# Supplementary material for: Isolation and reactivity of an elusive diazoalkene
Source: Springer Nature journal article supplement (doi:10.1038/s41557-021-00675-5), 2021-04-29
Supplement: 41557_2021_675_MOESM3_ESM.cif [file 41557_2021_675_MOESM3_ESM.cif]

data_pa5_29_cg
_audit_creation_date               2020-11-04
_audit_creation_method
;
Olex2 1.3
(compiled 2020.07.31 svn.rc2a77460 for OlexSys, GUI svn.r6145)
;
_shelx_SHELXL_version_number       '2018/3'
_audit_contact_author_address      ?
_audit_contact_author_email        ?
_audit_contact_author_name         ''
_audit_contact_author_phone        ?
_publ_contact_author_id_orcid      ?
_publ_section_references
;
D. Kratzert, I. Krossing, (2018), J. Appl. Cryst. 51, 928-934.

Dolomanov, O.V., Bourhis, L.J., Gildea, R.J, Howard, J.A.K. & Puschmann, H.
 (2009), J. Appl. Cryst. 42, 339-341.

Kratzert, D., Holstein, J.J. & Krossing, I. (2015). J. Appl. Cryst. 48, 933-938.

Sheldrick, G.M. (2008). Acta Cryst. A64, 112-122.

Sheldrick, G.M. (2015). Acta Cryst. A71, 3-8.
;
_chemical_name_common              ?
_chemical_name_systematic          ?
_chemical_formula_moiety           'C49 H53 N3, 0.5(C5 H12)'
_chemical_formula_sum              'C51.50 H59 N3'
_chemical_formula_weight           720.01
_chemical_melting_point            ?
loop_
  _atom_type_symbol
  _atom_type_description
  _atom_type_scat_dispersion_real
  _atom_type_scat_dispersion_imag
  _atom_type_scat_source
 'C' 'C' 0.0033 0.0016 'International Tables Vol C Tables 4.2.6.8 and 6.1.1.4'
 'H' 'H' 0.0000 0.0000 'International Tables Vol C Tables 4.2.6.8 and 6.1.1.4'
 'N' 'N' 0.0061 0.0033 'International Tables Vol C Tables 4.2.6.8 and 6.1.1.4'

_shelx_space_group_comment
;
The symmetry employed for this shelxl refinement is uniquely defined
by the following loop, which should always be used as a source of
symmetry information in preference to the above space-group names.
They are only intended as comments.
;
_space_group_crystal_system        'triclinic'
_space_group_IT_number             2
_space_group_name_H-M_alt          'P -1'
_space_group_name_Hall             '-P 1'
loop_
  _space_group_symop_operation_xyz
 'x, y, z'
 '-x, -y, -z'

_cell_length_a                     11.8302(12)
_cell_length_b                     13.7363(13)
_cell_length_c                     14.8635(13)
_cell_angle_alpha                  105.869(3)
_cell_angle_beta                   108.142(3)
_cell_angle_gamma                  97.134(4)
_cell_volume                       2149.1(4)
_cell_formula_units_Z              2
_cell_measurement_reflns_used      9916
_cell_measurement_temperature      100.0
_cell_measurement_theta_max        29.561
_cell_measurement_theta_min        2.538
_shelx_estimated_absorpt_T_max     0.984
_shelx_estimated_absorpt_T_min     0.978
_exptl_absorpt_coefficient_mu      0.064
_exptl_absorpt_correction_T_max    0.9011
_exptl_absorpt_correction_T_min    0.8721
_exptl_absorpt_correction_type     multi-scan
_exptl_absorpt_process_details
;
SADABS-2016/2 (Bruker,2016/2) was used for absorption correction.
wR2(int) was 0.1178 before and 0.0573 after correction.
The Ratio of minimum to maximum transmission is 0.9678.
The \l/2 correction factor is Not present.
;
_exptl_absorpt_special_details     ?
_exptl_crystal_colour              colourless
_exptl_crystal_colour_primary      colourless
_exptl_crystal_density_diffrn      1.113
_exptl_crystal_density_meas        ?
_exptl_crystal_density_method      ?
_exptl_crystal_description         block
_exptl_crystal_F_000               778
loop_
  _exptl_crystal_face_index_h
  _exptl_crystal_face_index_k
  _exptl_crystal_face_index_l
  _exptl_crystal_face_perp_dist
 0.00 -2.00 1.00 0.1490
 0.00 2.00 -1.00 0.1230
 -1.00 2.00 2.00 0.1380
 1.00 -2.00 -2.00 0.1140
 -1.00 1.00 2.00 0.1320
 1.00 -1.00 -2.00 0.1080
 0.00 1.00 -1.00 0.1170
 0.00 -1.00 1.00 0.1720
 -1.00 2.00 0.00 0.1000
 1.00 -2.00 0.00 0.1550
 1.00 -1.00 -1.00 0.1240
 1.00 0.00 -2.00 0.1310
 -1.00 0.00 2.00 0.1190
 2.00 -1.00 -2.00 0.1040
 1.00 -1.00 0.00 0.1670
 -2.00 2.00 -1.00 0.0460
 2.00 -2.00 1.00 0.1740
 -2.00 0.00 1.00 0.0620
 -2.00 1.00 -1.00 0.0340
 2.00 -1.00 1.00 0.1660
 1.00 1.00 0.00 0.1530
 -1.00 -1.00 0.00 0.0520

_exptl_crystal_size_max            0.348
_exptl_crystal_size_mid            0.28
_exptl_crystal_size_min            0.255
_exptl_transmission_factor_max     ?
_exptl_transmission_factor_min     ?
_diffrn_reflns_av_R_equivalents    0.0494
_diffrn_reflns_av_unetI/netI       0.0322
_diffrn_reflns_Laue_measured_fraction_full  0.999
_diffrn_reflns_Laue_measured_fraction_max  0.992
_diffrn_reflns_limit_h_max         16
_diffrn_reflns_limit_h_min         -16
_diffrn_reflns_limit_k_max         19
_diffrn_reflns_limit_k_min         -19
_diffrn_reflns_limit_l_max         20
_diffrn_reflns_limit_l_min         -18
_diffrn_reflns_number              79287
_diffrn_reflns_point_group_measured_fraction_full  0.999
_diffrn_reflns_point_group_measured_fraction_max  0.992
_diffrn_reflns_theta_full          25.242
_diffrn_reflns_theta_max           29.617
_diffrn_reflns_theta_min           2.449
_diffrn_ambient_temperature        100.0
_diffrn_detector_area_resol_mean   ?
_diffrn_measured_fraction_theta_full  0.999
_diffrn_measured_fraction_theta_max  0.992
_diffrn_measurement_device_type    'Bruker APEX-II CCD'
_diffrn_measurement_method         '\f and \w scans'
_diffrn_radiation_type             MoK\a
_diffrn_radiation_wavelength       0.71073
_diffrn_source                     ?
_diffrn_source_current             1.4
_diffrn_source_power               0.07
_diffrn_source_voltage             50.0
_diffrn_standards_number           0
_reflns_Friedel_coverage           0.000
_reflns_Friedel_fraction_full      .
_reflns_Friedel_fraction_max       .
_reflns_number_gt                  9300
_reflns_number_total               12012
_reflns_special_details
;
 Reflections were merged by SHELXL according to the crystal
 class for the calculation of statistics and refinement.
 
 _reflns_Friedel_fraction is defined as the number of unique
 Friedel pairs measured divided by the number that would be
 possible theoretically, ignoring centric projections and
 systematic absences.
;
_reflns_threshold_expression       'I > 2\s(I)'
_computing_cell_refinement         'SAINT V8.40A (Bruker, 2019)'
_computing_data_collection         ?
_computing_data_reduction          'SAINT V8.40A (Bruker, 2019)'
_computing_molecular_graphics      'Olex2 1.3 (Dolomanov et al., 2009)'
_computing_publication_material    'Olex2 1.3 (Dolomanov et al., 2009)'
_computing_structure_refinement    'XL  (Sheldrick, 2008)'
_computing_structure_solution      'SHELXT 2014/5 (Sheldrick, 2014)'
_refine_diff_density_max           0.305
_refine_diff_density_min           -0.272
_refine_diff_density_rms           0.044
_refine_ls_extinction_coef         .
_refine_ls_extinction_method       none
_refine_ls_goodness_of_fit_ref     1.035
_refine_ls_hydrogen_treatment      constr
_refine_ls_matrix_type             full
_refine_ls_number_parameters       526
_refine_ls_number_reflns           12012
_refine_ls_number_restraints       61
_refine_ls_R_factor_all            0.0658
_refine_ls_R_factor_gt             0.0451
_refine_ls_restrained_S_all        1.032
_refine_ls_shift/su_max            0.001
_refine_ls_shift/su_mean           0.000
_refine_ls_structure_factor_coef   Fsqd
_refine_ls_weighting_details      
 'w=1/[\s^2^(Fo^2^)+(0.0409P)^2^+0.8560P] where P=(Fo^2^+2Fc^2^)/3'
_refine_ls_weighting_scheme        calc
_refine_ls_wR_factor_gt            0.1018
_refine_ls_wR_factor_ref           0.1154
_refine_special_details            ?
_olex2_refinement_description
;
1. Fixed Uiso
 At 1.2 times of:
  All C(H) groups, All C(H,H) groups
 At 1.5 times of:
  All C(H,H,H) groups
2. Restrained distances
 C50-C51 = C51-C52 = C52-C53 = C53-C54
 1.52 with sigma of 0.02
 C50-C52 = C51-C53 = C52-C54
 2.54 with sigma of 0.04
 C50-C51 \\sim C51-C52 \\sim C52-C53 \\sim C53-C54
 with sigma of 0.02
 C50-C52 \\sim C52-C54 \\sim C51-C53
 with sigma of 0.04
3. Uiso/Uaniso restraints and constraints
C50 \\sim C51 \\sim C52 \\sim C53 \\sim C54: within 2A with sigma of 0.04 and
sigma for terminal atoms of 0.08 within 2A
4. Rigid body (RIGU) restrains
 C50, C51, C52, C53, C54
 with sigma for 1-2 distances of 0.004 and sigma for 1-3 distances of 0.004
5. Others
 Fixed Sof: C50(0.5) H50A(0.5) H50B(0.5) H50C(0.5) C51(0.5) H51A(0.5)
 H51B(0.5) C52(0.5) H52A(0.5) H52B(0.5) C53(0.5) H53A(0.5) H53B(0.5) C54(0.5)
 H54A(0.5) H54B(0.5) H54C(0.5)
6.a Ternary CH refined with riding coordinates:
 C25(H25), C28(H28), C44(H44), C47(H47)
6.b Secondary CH2 refined with riding coordinates:
 C51(H51A,H51B), C52(H52A,H52B), C53(H53A,H53B)
6.c Aromatic/amide H refined with riding coordinates:
 C6(H6), C7(H7), C8(H8), C9(H9), C10(H10), C13(H13), C14(H14), C15(H15),
 C21(H21), C22(H22), C23(H23), C33(H33), C34(H34), C35(H35), C36(H36), C37(H37),
  C40(H40), C41(H41), C42(H42)
6.d Idealised Me refined as rotating group:
 C17(H17A,H17B,H17C), C18(H18A,H18B,H18C), C26(H26A,H26B,H26C), C27(H27A,H27B,
 H27C), C29(H29A,H29B,H29C), C30(H30A,H30B,H30C), C45(H45A,H45B,H45C), C46(H46A,
 H46B,H46C), C48(H48A,H48B,H48C), C49(H49A,H49B,H49C), C50(H50A,H50B,H50C),
 C54(H54A,H54B,H54C)
;
_atom_sites_solution_hydrogens     geom
_atom_sites_solution_primary       dual
_atom_sites_solution_secondary     ?
loop_
  _atom_site_label
  _atom_site_type_symbol
  _atom_site_fract_x
  _atom_site_fract_y
  _atom_site_fract_z
  _atom_site_U_iso_or_equiv
  _atom_site_adp_type
  _atom_site_occupancy
  _atom_site_site_symmetry_order
  _atom_site_calc_flag
  _atom_site_refinement_flags_posn
  _atom_site_refinement_flags_adp
  _atom_site_refinement_flags_occupancy
  _atom_site_disorder_assembly
  _atom_site_disorder_group
 N1 N 0.45172(9) 0.75961(8) 0.71197(7) 0.0228(2) Uani 1 1 d . . . . .
 N2 N 0.33101(8) 0.66185(7) 0.34582(7) 0.01575(17) Uani 1 1 d . . . . .
 N3 N 0.48822(8) 0.71633(7) 0.31207(6) 0.01534(17) Uani 1 1 d . . . . .
 C1 C 0.42491(10) 0.73836(8) 0.61788(8) 0.0187(2) Uani 1 1 d . . . . .
 C2 C 0.41199(10) 0.71568(9) 0.52855(8) 0.0202(2) Uani 1 1 d . . . . .
 C3 C 0.42673(10) 0.71228(8) 0.43921(8) 0.0163(2) Uani 1 1 d . . . . .
 C4 C 0.52737(10) 0.74620(8) 0.41675(8) 0.0159(2) Uani 1 1 d . . . . .
 C5 C 0.65106(10) 0.80001(8) 0.48812(8) 0.0181(2) Uani 1 1 d . . . . .
 C6 C 0.75782(10) 0.78358(9) 0.47014(9) 0.0224(2) Uani 1 1 d . . . . .
 H6 H 0.752228 0.739846 0.406408 0.027 Uiso 1 1 calc R U . . .
 C7 C 0.87199(11) 0.83099(10) 0.54516(10) 0.0281(3) Uani 1 1 d . . . . .
 H7 H 0.943717 0.819410 0.532091 0.034 Uiso 1 1 calc R U . . .
 C8 C 0.88213(12) 0.89489(11) 0.63869(10) 0.0315(3) Uani 1 1 d . . . . .
 H8 H 0.960278 0.926079 0.689891 0.038 Uiso 1 1 calc R U . . .
 C9 C 0.77749(13) 0.91290(11) 0.65692(9) 0.0316(3) Uani 1 1 d . . . . .
 H9 H 0.783941 0.957273 0.720654 0.038 Uiso 1 1 calc R U . . .
 C10 C 0.66315(11) 0.86648(9) 0.58256(9) 0.0247(2) Uani 1 1 d . . . . .
 H10 H 0.592068 0.879943 0.595853 0.030 Uiso 1 1 calc R U . . .
 C11 C 0.37985(12) 0.78638(9) 0.76867(9) 0.0223(2) Uani 1 1 d . . . . .
 C12 C 0.25102(12) 0.76869(9) 0.73014(9) 0.0250(2) Uani 1 1 d . . . . .
 C13 C 0.19147(15) 0.80465(11) 0.79599(12) 0.0365(3) Uani 1 1 d . . . . .
 H13 H 0.104983 0.793823 0.770517 0.044 Uiso 1 1 calc R U . . .
 C14 C 0.25533(17) 0.85575(12) 0.89761(12) 0.0449(4) Uani 1 1 d . . . . .
 H14 H 0.213194 0.881002 0.940859 0.054 Uiso 1 1 calc R U . . .
 C15 C 0.38119(17) 0.86961(11) 0.93543(11) 0.0403(4) Uani 1 1 d . . . . .
 H15 H 0.424761 0.903268 1.005286 0.048 Uiso 1 1 calc R U . . .
 C16 C 0.44507(13) 0.83524(9) 0.87320(9) 0.0287(3) Uani 1 1 d . . . . .
 C17 C 0.58177(14) 0.85241(11) 0.91430(10) 0.0347(3) Uani 1 1 d . . . . .
 H17A H 0.617570 0.898000 0.884953 0.052 Uiso 1 1 calc R U . . .
 H17B H 0.604749 0.785488 0.897383 0.052 Uiso 1 1 calc R U . . .
 H17C H 0.612189 0.884945 0.987386 0.052 Uiso 1 1 calc R U . . .
 C18 C 0.17744(11) 0.71147(10) 0.62089(10) 0.0273(3) Uani 1 1 d . . . . .
 H18A H 0.090174 0.699840 0.610344 0.041 Uiso 1 1 calc R U . . .
 H18B H 0.199072 0.644397 0.600516 0.041 Uiso 1 1 calc R U . . .
 H18C H 0.195143 0.752921 0.580645 0.041 Uiso 1 1 calc R U . . .
 C19 C 0.21380(10) 0.60844(8) 0.33923(8) 0.0169(2) Uani 1 1 d . . . . .
 C20 C 0.20537(10) 0.50981(9) 0.35027(8) 0.0196(2) Uani 1 1 d . . . . .
 C21 C 0.09278(11) 0.45985(9) 0.34557(9) 0.0248(2) Uani 1 1 d . . . . .
 H21 H 0.083446 0.392711 0.352107 0.030 Uiso 1 1 calc R U . . .
 C22 C -0.00591(11) 0.50633(10) 0.33152(10) 0.0267(3) Uani 1 1 d . . . . .
 H22 H -0.082163 0.470643 0.327912 0.032 Uiso 1 1 calc R U . . .
 C23 C 0.00606(11) 0.60444(9) 0.32273(9) 0.0235(2) Uani 1 1 d . . . . .
 H23 H -0.062190 0.635576 0.313543 0.028 Uiso 1 1 calc R U . . .
 C24 C 0.11709(10) 0.65862(9) 0.32714(8) 0.0189(2) Uani 1 1 d . . . . .
 C25 C 0.12912(11) 0.76702(9) 0.31913(9) 0.0220(2) Uani 1 1 d . . . . .
 H25 H 0.218049 0.799416 0.341602 0.026 Uiso 1 1 calc R U . . .
 C26 C 0.07478(12) 0.83625(10) 0.38641(10) 0.0287(3) Uani 1 1 d . . . . .
 H26A H -0.014106 0.810508 0.360711 0.043 Uiso 1 1 calc R U . . .
 H26B H 0.094168 0.907783 0.386590 0.043 Uiso 1 1 calc R U . . .
 H26C H 0.109552 0.834707 0.454949 0.043 Uiso 1 1 calc R U . . .
 C27 C 0.06763(13) 0.76207(10) 0.21003(10) 0.0291(3) Uani 1 1 d . . . . .
 H27A H 0.105049 0.720157 0.167787 0.044 Uiso 1 1 calc R U . . .
 H27B H 0.078333 0.832547 0.206234 0.044 Uiso 1 1 calc R U . . .
 H27C H -0.019760 0.730333 0.186420 0.044 Uiso 1 1 calc R U . . .
 C28 C 0.31215(11) 0.45711(9) 0.36902(9) 0.0232(2) Uani 1 1 d . . . . .
 H28 H 0.384088 0.502924 0.368061 0.028 Uiso 1 1 calc R U . . .
 C29 C 0.34575(12) 0.44470(10) 0.47289(10) 0.0284(3) Uani 1 1 d . . . . .
 H29A H 0.275683 0.401255 0.475925 0.043 Uiso 1 1 calc R U . . .
 H29B H 0.367761 0.513243 0.524330 0.043 Uiso 1 1 calc R U . . .
 H29C H 0.415301 0.411649 0.484825 0.043 Uiso 1 1 calc R U . . .
 C30 C 0.28480(14) 0.35103(11) 0.28824(11) 0.0348(3) Uani 1 1 d . . . . .
 H30A H 0.264048 0.359772 0.222185 0.052 Uiso 1 1 calc R U . . .
 H30B H 0.215893 0.304222 0.289225 0.052 Uiso 1 1 calc R U . . .
 H30C H 0.356973 0.321325 0.301713 0.052 Uiso 1 1 calc R U . . .
 C31 C 0.36958(10) 0.66572(8) 0.27001(8) 0.01578(19) Uani 1 1 d . . . . .
 C32 C 0.29624(10) 0.62213(8) 0.16206(8) 0.0172(2) Uani 1 1 d . . . . .
 C33 C 0.30928(10) 0.67549(9) 0.09644(8) 0.0207(2) Uani 1 1 d . . . . .
 H33 H 0.366181 0.740555 0.121686 0.025 Uiso 1 1 calc R U . . .
 C34 C 0.23927(11) 0.63352(10) -0.00531(9) 0.0254(2) Uani 1 1 d . . . . .
 H34 H 0.248489 0.670040 -0.049344 0.030 Uiso 1 1 calc R U . . .
 C35 C 0.15602(11) 0.53861(10) -0.04290(9) 0.0268(3) Uani 1 1 d . . . . .
 H35 H 0.107812 0.510458 -0.112434 0.032 Uiso 1 1 calc R U . . .
 C36 C 0.14327(11) 0.48483(10) 0.02128(9) 0.0254(2) Uani 1 1 d . . . . .
 H36 H 0.086880 0.419429 -0.004585 0.030 Uiso 1 1 calc R U . . .
 C37 C 0.21252(10) 0.52617(9) 0.12305(8) 0.0213(2) Uani 1 1 d . . . . .
 H37 H 0.202981 0.489013 0.166531 0.026 Uiso 1 1 calc R U . . .
 C38 C 0.56541(9) 0.73074(8) 0.25569(8) 0.0158(2) Uani 1 1 d . . . . .
 C39 C 0.60146(10) 0.64384(9) 0.20800(8) 0.0184(2) Uani 1 1 d . . . . .
 C40 C 0.67512(11) 0.65995(9) 0.15375(9) 0.0229(2) Uani 1 1 d . . . . .
 H40 H 0.701723 0.603151 0.120197 0.028 Uiso 1 1 calc R U . . .
 C41 C 0.71015(11) 0.75764(10) 0.14801(9) 0.0255(2) Uani 1 1 d . . . . .
 H41 H 0.759486 0.766660 0.109935 0.031 Uiso 1 1 calc R U . . .
 C42 C 0.67405(11) 0.84198(9) 0.19709(9) 0.0237(2) Uani 1 1 d . . . . .
 H42 H 0.699579 0.908377 0.192792 0.028 Uiso 1 1 calc R U . . .
 C43 C 0.60057(10) 0.83097(8) 0.25291(8) 0.0189(2) Uani 1 1 d . . . . .
 C44 C 0.56169(12) 0.92474(9) 0.30611(9) 0.0229(2) Uani 1 1 d . . . . .
 H44 H 0.512719 0.901814 0.343717 0.027 Uiso 1 1 calc R U . . .
 C45 C 0.48101(13) 0.96794(10) 0.23094(9) 0.0284(3) Uani 1 1 d . . . . .
 H45A H 0.525473 0.986871 0.190245 0.043 Uiso 1 1 calc R U . . .
 H45B H 0.459859 1.029653 0.267372 0.043 Uiso 1 1 calc R U . . .
 H45C H 0.406117 0.914916 0.187161 0.043 Uiso 1 1 calc R U . . .
 C46 C 0.67286(14) 1.01014(10) 0.38181(10) 0.0333(3) Uani 1 1 d . . . . .
 H46A H 0.724613 0.981462 0.428714 0.050 Uiso 1 1 calc R U . . .
 H46B H 0.645359 1.066966 0.419052 0.050 Uiso 1 1 calc R U . . .
 H46C H 0.719731 1.036648 0.346111 0.050 Uiso 1 1 calc R U . . .
 C47 C 0.56544(10) 0.53619(9) 0.21421(9) 0.0208(2) Uani 1 1 d . . . . .
 H47 H 0.512726 0.540386 0.255635 0.025 Uiso 1 1 calc R U . . .
 C48 C 0.67808(12) 0.49951(10) 0.26530(10) 0.0270(3) Uani 1 1 d . . . . .
 H48A H 0.729598 0.492287 0.224533 0.040 Uiso 1 1 calc R U . . .
 H48B H 0.651924 0.432204 0.272109 0.040 Uiso 1 1 calc R U . . .
 H48C H 0.724710 0.550593 0.331889 0.040 Uiso 1 1 calc R U . . .
 C49 C 0.49196(12) 0.45593(10) 0.11015(10) 0.0287(3) Uani 1 1 d . . . . .
 H49A H 0.420750 0.479976 0.077089 0.043 Uiso 1 1 calc R U . . .
 H49B H 0.464575 0.389114 0.117368 0.043 Uiso 1 1 calc R U . . .
 H49C H 0.543636 0.447444 0.069554 0.043 Uiso 1 1 calc R U . . .
 C50 C 0.9420(6) 0.8239(4) 0.9601(5) 0.0668(16) Uani 0.5 1 d D U P A -1
 H50A H 0.976213 0.811506 0.906929 0.100 Uiso 0.5 1 calc R U P A -1
 H50B H 0.854905 0.822332 0.931342 0.100 Uiso 0.5 1 calc R U P A -1
 H50C H 0.952091 0.769647 0.991299 0.100 Uiso 0.5 1 calc R U P A -1
 C51 C 1.0083(4) 0.9293(3) 1.0387(3) 0.0486(8) Uani 0.5 1 d D U P A -1
 H51A H 1.095914 0.929986 1.068226 0.058 Uiso 0.5 1 calc R U P A -1
 H51B H 0.974844 0.940520 1.093081 0.058 Uiso 0.5 1 calc R U P A -1
 C52 C 0.9961(6) 1.0180(3) 0.9957(5) 0.0385(10) Uani 0.5 1 d D U P A -1
 H52A H 0.908420 1.014443 0.961913 0.046 Uiso 0.5 1 calc R U P A -1
 H52B H 1.035000 1.009754 0.944826 0.046 Uiso 0.5 1 calc R U P A -1
 C53 C 1.0554(3) 1.1241(3) 1.0769(2) 0.0409(7) Uani 0.5 1 d D U P A -1
 H53A H 1.020799 1.129952 1.130301 0.049 Uiso 0.5 1 calc R U P A -1
 H53B H 1.144128 1.129328 1.107215 0.049 Uiso 0.5 1 calc R U P A -1
 C54 C 1.0361(5) 1.2138(4) 1.0366(4) 0.0520(12) Uani 0.5 1 d D U P A -1
 H54A H 1.080372 1.214393 0.990900 0.078 Uiso 0.5 1 calc R U P A -1
 H54B H 1.066784 1.279571 1.092644 0.078 Uiso 0.5 1 calc R U P A -1
 H54C H 0.948706 1.205155 1.000458 0.078 Uiso 0.5 1 calc R U P A -1

loop_
  _atom_site_aniso_label
  _atom_site_aniso_U_11
  _atom_site_aniso_U_22
  _atom_site_aniso_U_33
  _atom_site_aniso_U_23
  _atom_site_aniso_U_13
  _atom_site_aniso_U_12
 N1 0.0261(5) 0.0251(5) 0.0169(4) 0.0063(4) 0.0076(4) 0.0063(4)
 N2 0.0148(4) 0.0177(4) 0.0157(4) 0.0066(3) 0.0060(3) 0.0033(3)
 N3 0.0158(4) 0.0162(4) 0.0145(4) 0.0057(3) 0.0058(3) 0.0033(3)
 C1 0.0189(5) 0.0171(5) 0.0206(5) 0.0063(4) 0.0081(4) 0.0035(4)
 C2 0.0197(5) 0.0232(5) 0.0196(5) 0.0083(4) 0.0083(4) 0.0055(4)
 C3 0.0180(5) 0.0157(5) 0.0157(5) 0.0057(4) 0.0057(4) 0.0048(4)
 C4 0.0182(5) 0.0153(5) 0.0142(5) 0.0050(4) 0.0057(4) 0.0039(4)
 C5 0.0188(5) 0.0177(5) 0.0170(5) 0.0078(4) 0.0047(4) 0.0017(4)
 C6 0.0201(5) 0.0242(6) 0.0222(5) 0.0093(4) 0.0060(4) 0.0037(4)
 C7 0.0180(6) 0.0342(7) 0.0310(6) 0.0156(5) 0.0046(5) 0.0028(5)
 C8 0.0243(6) 0.0349(7) 0.0253(6) 0.0120(5) -0.0019(5) -0.0041(5)
 C9 0.0331(7) 0.0317(7) 0.0189(6) 0.0032(5) 0.0035(5) -0.0046(5)
 C10 0.0250(6) 0.0245(6) 0.0212(6) 0.0051(5) 0.0077(5) 0.0007(5)
 C11 0.0347(6) 0.0169(5) 0.0198(5) 0.0082(4) 0.0135(5) 0.0067(5)
 C12 0.0337(7) 0.0207(5) 0.0284(6) 0.0118(5) 0.0181(5) 0.0072(5)
 C13 0.0448(8) 0.0321(7) 0.0453(8) 0.0136(6) 0.0315(7) 0.0113(6)
 C14 0.0674(11) 0.0375(8) 0.0429(8) 0.0078(7) 0.0419(8) 0.0123(8)
 C15 0.0687(11) 0.0300(7) 0.0244(6) 0.0047(5) 0.0259(7) 0.0054(7)
 C16 0.0465(8) 0.0207(6) 0.0197(6) 0.0076(5) 0.0135(5) 0.0049(5)
 C17 0.0484(8) 0.0289(7) 0.0185(6) 0.0072(5) 0.0031(5) 0.0051(6)
 C18 0.0241(6) 0.0324(6) 0.0299(6) 0.0145(5) 0.0125(5) 0.0061(5)
 C19 0.0155(5) 0.0193(5) 0.0160(5) 0.0064(4) 0.0061(4) 0.0023(4)
 C20 0.0181(5) 0.0214(5) 0.0202(5) 0.0089(4) 0.0064(4) 0.0048(4)
 C21 0.0215(6) 0.0242(6) 0.0313(6) 0.0156(5) 0.0082(5) 0.0032(5)
 C22 0.0176(5) 0.0310(6) 0.0349(7) 0.0172(5) 0.0093(5) 0.0028(5)
 C23 0.0169(5) 0.0275(6) 0.0284(6) 0.0129(5) 0.0075(4) 0.0066(4)
 C24 0.0184(5) 0.0208(5) 0.0177(5) 0.0078(4) 0.0055(4) 0.0046(4)
 C25 0.0190(5) 0.0209(5) 0.0283(6) 0.0111(5) 0.0083(4) 0.0063(4)
 C26 0.0323(7) 0.0251(6) 0.0285(6) 0.0082(5) 0.0101(5) 0.0101(5)
 C27 0.0358(7) 0.0308(6) 0.0304(6) 0.0179(5) 0.0153(5) 0.0160(5)
 C28 0.0205(5) 0.0226(5) 0.0295(6) 0.0134(5) 0.0084(5) 0.0070(4)
 C29 0.0257(6) 0.0287(6) 0.0334(7) 0.0185(5) 0.0068(5) 0.0074(5)
 C30 0.0390(8) 0.0280(7) 0.0378(7) 0.0106(6) 0.0117(6) 0.0155(6)
 C31 0.0163(5) 0.0153(5) 0.0166(5) 0.0058(4) 0.0064(4) 0.0042(4)
 C32 0.0158(5) 0.0197(5) 0.0161(5) 0.0052(4) 0.0058(4) 0.0055(4)
 C33 0.0209(5) 0.0224(5) 0.0188(5) 0.0074(4) 0.0063(4) 0.0053(4)
 C34 0.0260(6) 0.0332(6) 0.0187(5) 0.0106(5) 0.0079(5) 0.0089(5)
 C35 0.0230(6) 0.0358(7) 0.0158(5) 0.0037(5) 0.0038(4) 0.0069(5)
 C36 0.0202(6) 0.0261(6) 0.0223(6) 0.0007(5) 0.0055(4) 0.0012(5)
 C37 0.0196(5) 0.0225(5) 0.0201(5) 0.0054(4) 0.0071(4) 0.0027(4)
 C38 0.0155(5) 0.0180(5) 0.0138(5) 0.0058(4) 0.0053(4) 0.0024(4)
 C39 0.0164(5) 0.0204(5) 0.0179(5) 0.0064(4) 0.0054(4) 0.0043(4)
 C40 0.0212(6) 0.0274(6) 0.0230(5) 0.0079(5) 0.0107(4) 0.0087(5)
 C41 0.0223(6) 0.0343(6) 0.0259(6) 0.0137(5) 0.0139(5) 0.0054(5)
 C42 0.0250(6) 0.0240(6) 0.0236(6) 0.0109(5) 0.0099(5) 0.0008(5)
 C43 0.0205(5) 0.0181(5) 0.0171(5) 0.0062(4) 0.0059(4) 0.0022(4)
 C44 0.0335(6) 0.0160(5) 0.0206(5) 0.0065(4) 0.0115(5) 0.0049(4)
 C45 0.0381(7) 0.0211(6) 0.0248(6) 0.0066(5) 0.0096(5) 0.0101(5)
 C46 0.0438(8) 0.0199(6) 0.0259(6) 0.0037(5) 0.0040(6) 0.0025(5)
 C47 0.0212(5) 0.0181(5) 0.0255(6) 0.0074(4) 0.0108(4) 0.0064(4)
 C48 0.0273(6) 0.0254(6) 0.0311(6) 0.0121(5) 0.0100(5) 0.0111(5)
 C49 0.0265(6) 0.0215(6) 0.0323(7) 0.0033(5) 0.0083(5) 0.0043(5)
 C50 0.075(4) 0.045(3) 0.059(3) 0.002(3) 0.009(3) 0.011(2)
 C51 0.064(2) 0.0421(18) 0.0378(17) 0.0111(14) 0.0168(16) 0.0142(16)
 C52 0.0419(16) 0.050(3) 0.0284(16) 0.018(2) 0.0119(13) 0.016(2)
 C53 0.0460(18) 0.0474(18) 0.0322(15) 0.0199(14) 0.0124(13) 0.0108(14)
 C54 0.057(3) 0.056(3) 0.043(2) 0.026(2) 0.0099(19) 0.007(2)

_geom_special_details
;
 All esds (except the esd in the dihedral angle between two l.s. planes)
 are estimated using the full covariance matrix.  The cell esds are taken
 into account individually in the estimation of esds in distances, angles
 and torsion angles; correlations between esds in cell parameters are only
 used when they are defined by crystal symmetry.  An approximate (isotropic)
 treatment of cell esds is used for estimating esds involving l.s. planes.
;
loop_
  _geom_bond_atom_site_label_1
  _geom_bond_atom_site_label_2
  _geom_bond_distance
  _geom_bond_site_symmetry_2
  _geom_bond_publ_flag
 N1 C1 1.2725(14) . ?
 N1 C11 1.3867(15) . ?
 N2 C3 1.4105(13) . ?
 N2 C19 1.4470(13) . ?
 N2 C31 1.3519(13) . ?
 N3 C4 1.3994(13) . ?
 N3 C31 1.3482(14) . ?
 N3 C38 1.4483(13) . ?
 C1 C2 1.2324(16) . ?
 C2 C3 1.3815(15) . ?
 C3 C4 1.3931(15) . ?
 C4 C5 1.4659(15) . ?
 C5 C6 1.4020(16) . ?
 C5 C10 1.4022(16) . ?
 C6 H6 0.9500 . ?
 C6 C7 1.3922(17) . ?
 C7 H7 0.9500 . ?
 C7 C8 1.3857(19) . ?
 C8 H8 0.9500 . ?
 C8 C9 1.384(2) . ?
 C9 H9 0.9500 . ?
 C9 C10 1.3882(17) . ?
 C10 H10 0.9500 . ?
 C11 C12 1.4137(18) . ?
 C11 C16 1.4192(17) . ?
 C12 C13 1.3963(17) . ?
 C12 C18 1.5047(18) . ?
 C13 H13 0.9500 . ?
 C13 C14 1.387(2) . ?
 C14 H14 0.9500 . ?
 C14 C15 1.385(3) . ?
 C15 H15 0.9500 . ?
 C15 C16 1.3909(19) . ?
 C16 C17 1.502(2) . ?
 C17 H17A 0.9800 . ?
 C17 H17B 0.9800 . ?
 C17 H17C 0.9800 . ?
 C18 H18A 0.9800 . ?
 C18 H18B 0.9800 . ?
 C18 H18C 0.9800 . ?
 C19 C20 1.4037(15) . ?
 C19 C24 1.3971(15) . ?
 C20 C21 1.3925(16) . ?
 C20 C28 1.5216(16) . ?
 C21 H21 0.9500 . ?
 C21 C22 1.3859(17) . ?
 C22 H22 0.9500 . ?
 C22 C23 1.3834(17) . ?
 C23 H23 0.9500 . ?
 C23 C24 1.4001(16) . ?
 C24 C25 1.5188(15) . ?
 C25 H25 1.0000 . ?
 C25 C26 1.5328(17) . ?
 C25 C27 1.5349(17) . ?
 C26 H26A 0.9800 . ?
 C26 H26B 0.9800 . ?
 C26 H26C 0.9800 . ?
 C27 H27A 0.9800 . ?
 C27 H27B 0.9800 . ?
 C27 H27C 0.9800 . ?
 C28 H28 1.0000 . ?
 C28 C29 1.5327(16) . ?
 C28 C30 1.5343(18) . ?
 C29 H29A 0.9800 . ?
 C29 H29B 0.9800 . ?
 C29 H29C 0.9800 . ?
 C30 H30A 0.9800 . ?
 C30 H30B 0.9800 . ?
 C30 H30C 0.9800 . ?
 C31 C32 1.4712(14) . ?
 C32 C33 1.4032(15) . ?
 C32 C37 1.3981(15) . ?
 C33 H33 0.9500 . ?
 C33 C34 1.3893(16) . ?
 C34 H34 0.9500 . ?
 C34 C35 1.3862(18) . ?
 C35 H35 0.9500 . ?
 C35 C36 1.3877(18) . ?
 C36 H36 0.9500 . ?
 C36 C37 1.3873(16) . ?
 C37 H37 0.9500 . ?
 C38 C39 1.4004(15) . ?
 C38 C43 1.4035(14) . ?
 C39 C40 1.3949(15) . ?
 C39 C47 1.5229(15) . ?
 C40 H40 0.9500 . ?
 C40 C41 1.3879(17) . ?
 C41 H41 0.9500 . ?
 C41 C42 1.3824(18) . ?
 C42 H42 0.9500 . ?
 C42 C43 1.3972(15) . ?
 C43 C44 1.5206(16) . ?
 C44 H44 1.0000 . ?
 C44 C45 1.5332(17) . ?
 C44 C46 1.5314(18) . ?
 C45 H45A 0.9800 . ?
 C45 H45B 0.9800 . ?
 C45 H45C 0.9800 . ?
 C46 H46A 0.9800 . ?
 C46 H46B 0.9800 . ?
 C46 H46C 0.9800 . ?
 C47 H47 1.0000 . ?
 C47 C48 1.5337(16) . ?
 C47 C49 1.5347(17) . ?
 C48 H48A 0.9800 . ?
 C48 H48B 0.9800 . ?
 C48 H48C 0.9800 . ?
 C49 H49A 0.9800 . ?
 C49 H49B 0.9800 . ?
 C49 H49C 0.9800 . ?
 C50 H50A 0.9800 . ?
 C50 H50B 0.9800 . ?
 C50 H50C 0.9800 . ?
 C50 C51 1.516(6) . ?
 C51 H51A 0.9900 . ?
 C51 H51B 0.9900 . ?
 C51 C52 1.525(4) . ?
 C52 H52A 0.9900 . ?
 C52 H52B 0.9900 . ?
 C52 C53 1.526(6) . ?
 C53 H53A 0.9900 . ?
 C53 H53B 0.9900 . ?
 C53 C54 1.522(4) . ?
 C54 H54A 0.9800 . ?
 C54 H54B 0.9800 . ?
 C54 H54C 0.9800 . ?

loop_
  _geom_angle_atom_site_label_1
  _geom_angle_atom_site_label_2
  _geom_angle_atom_site_label_3
  _geom_angle
  _geom_angle_site_symmetry_1
  _geom_angle_site_symmetry_3
  _geom_angle_publ_flag
 C1 N1 C11 129.06(11) . . ?
 C3 N2 C19 121.32(8) . . ?
 C31 N2 C3 110.38(9) . . ?
 C31 N2 C19 128.13(9) . . ?
 C4 N3 C38 125.23(9) . . ?
 C31 N3 C4 110.49(9) . . ?
 C31 N3 C38 124.14(9) . . ?
 C2 C1 N1 172.75(12) . . ?
 C1 C2 C3 163.90(12) . . ?
 C2 C3 N2 121.72(10) . . ?
 C2 C3 C4 132.55(10) . . ?
 C4 C3 N2 105.62(9) . . ?
 N3 C4 C5 126.46(9) . . ?
 C3 C4 N3 106.50(9) . . ?
 C3 C4 C5 127.02(9) . . ?
 C6 C5 C4 123.92(10) . . ?
 C6 C5 C10 118.12(11) . . ?
 C10 C5 C4 117.81(10) . . ?
 C5 C6 H6 119.8 . . ?
 C7 C6 C5 120.37(11) . . ?
 C7 C6 H6 119.8 . . ?
 C6 C7 H7 119.6 . . ?
 C8 C7 C6 120.72(12) . . ?
 C8 C7 H7 119.6 . . ?
 C7 C8 H8 120.3 . . ?
 C9 C8 C7 119.46(12) . . ?
 C9 C8 H8 120.3 . . ?
 C8 C9 H9 119.8 . . ?
 C8 C9 C10 120.36(12) . . ?
 C10 C9 H9 119.8 . . ?
 C5 C10 H10 119.5 . . ?
 C9 C10 C5 120.96(12) . . ?
 C9 C10 H10 119.5 . . ?
 N1 C11 C12 125.19(11) . . ?
 N1 C11 C16 115.07(11) . . ?
 C12 C11 C16 119.74(11) . . ?
 C11 C12 C18 121.64(11) . . ?
 C13 C12 C11 118.65(12) . . ?
 C13 C12 C18 119.70(12) . . ?
 C12 C13 H13 119.2 . . ?
 C14 C13 C12 121.70(15) . . ?
 C14 C13 H13 119.2 . . ?
 C13 C14 H14 120.3 . . ?
 C15 C14 C13 119.33(13) . . ?
 C15 C14 H14 120.3 . . ?
 C14 C15 H15 119.3 . . ?
 C14 C15 C16 121.34(13) . . ?
 C16 C15 H15 119.3 . . ?
 C11 C16 C17 119.71(11) . . ?
 C15 C16 C11 119.16(14) . . ?
 C15 C16 C17 121.10(12) . . ?
 C16 C17 H17A 109.5 . . ?
 C16 C17 H17B 109.5 . . ?
 C16 C17 H17C 109.5 . . ?
 H17A C17 H17B 109.5 . . ?
 H17A C17 H17C 109.5 . . ?
 H17B C17 H17C 109.5 . . ?
 C12 C18 H18A 109.5 . . ?
 C12 C18 H18B 109.5 . . ?
 C12 C18 H18C 109.5 . . ?
 H18A C18 H18B 109.5 . . ?
 H18A C18 H18C 109.5 . . ?
 H18B C18 H18C 109.5 . . ?
 C20 C19 N2 117.51(9) . . ?
 C24 C19 N2 119.08(9) . . ?
 C24 C19 C20 123.34(10) . . ?
 C19 C20 C28 123.66(10) . . ?
 C21 C20 C19 117.06(10) . . ?
 C21 C20 C28 119.26(10) . . ?
 C20 C21 H21 119.4 . . ?
 C22 C21 C20 121.17(11) . . ?
 C22 C21 H21 119.4 . . ?
 C21 C22 H22 119.8 . . ?
 C23 C22 C21 120.32(11) . . ?
 C23 C22 H22 119.8 . . ?
 C22 C23 H23 119.5 . . ?
 C22 C23 C24 121.10(11) . . ?
 C24 C23 H23 119.5 . . ?
 C19 C24 C23 116.97(10) . . ?
 C19 C24 C25 122.68(10) . . ?
 C23 C24 C25 120.35(10) . . ?
 C24 C25 H25 108.1 . . ?
 C24 C25 C26 111.76(10) . . ?
 C24 C25 C27 110.77(10) . . ?
 C26 C25 H25 108.1 . . ?
 C26 C25 C27 109.78(10) . . ?
 C27 C25 H25 108.1 . . ?
 C25 C26 H26A 109.5 . . ?
 C25 C26 H26B 109.5 . . ?
 C25 C26 H26C 109.5 . . ?
 H26A C26 H26B 109.5 . . ?
 H26A C26 H26C 109.5 . . ?
 H26B C26 H26C 109.5 . . ?
 C25 C27 H27A 109.5 . . ?
 C25 C27 H27B 109.5 . . ?
 C25 C27 H27C 109.5 . . ?
 H27A C27 H27B 109.5 . . ?
 H27A C27 H27C 109.5 . . ?
 H27B C27 H27C 109.5 . . ?
 C20 C28 H28 108.2 . . ?
 C20 C28 C29 109.94(10) . . ?
 C20 C28 C30 112.27(10) . . ?
 C29 C28 H28 108.2 . . ?
 C29 C28 C30 110.03(10) . . ?
 C30 C28 H28 108.2 . . ?
 C28 C29 H29A 109.5 . . ?
 C28 C29 H29B 109.5 . . ?
 C28 C29 H29C 109.5 . . ?
 H29A C29 H29B 109.5 . . ?
 H29A C29 H29C 109.5 . . ?
 H29B C29 H29C 109.5 . . ?
 C28 C30 H30A 109.5 . . ?
 C28 C30 H30B 109.5 . . ?
 C28 C30 H30C 109.5 . . ?
 H30A C30 H30B 109.5 . . ?
 H30A C30 H30C 109.5 . . ?
 H30B C30 H30C 109.5 . . ?
 N2 C31 C32 126.47(10) . . ?
 N3 C31 N2 107.00(9) . . ?
 N3 C31 C32 126.53(9) . . ?
 C33 C32 C31 120.83(10) . . ?
 C37 C32 C31 120.33(10) . . ?
 C37 C32 C33 118.84(10) . . ?
 C32 C33 H33 119.9 . . ?
 C34 C33 C32 120.23(11) . . ?
 C34 C33 H33 119.9 . . ?
 C33 C34 H34 119.8 . . ?
 C35 C34 C33 120.34(11) . . ?
 C35 C34 H34 119.8 . . ?
 C34 C35 H35 120.1 . . ?
 C34 C35 C36 119.84(11) . . ?
 C36 C35 H35 120.1 . . ?
 C35 C36 H36 119.9 . . ?
 C37 C36 C35 120.28(11) . . ?
 C37 C36 H36 119.9 . . ?
 C32 C37 H37 119.8 . . ?
 C36 C37 C32 120.47(11) . . ?
 C36 C37 H37 119.8 . . ?
 C39 C38 N3 117.92(9) . . ?
 C39 C38 C43 123.94(10) . . ?
 C43 C38 N3 118.14(9) . . ?
 C38 C39 C47 123.28(10) . . ?
 C40 C39 C38 116.63(10) . . ?
 C40 C39 C47 120.08(10) . . ?
 C39 C40 H40 119.5 . . ?
 C41 C40 C39 121.05(11) . . ?
 C41 C40 H40 119.5 . . ?
 C40 C41 H41 119.6 . . ?
 C42 C41 C40 120.75(11) . . ?
 C42 C41 H41 119.6 . . ?
 C41 C42 H42 119.5 . . ?
 C41 C42 C43 120.95(11) . . ?
 C43 C42 H42 119.5 . . ?
 C38 C43 C44 123.24(10) . . ?
 C42 C43 C38 116.68(10) . . ?
 C42 C43 C44 120.08(10) . . ?
 C43 C44 H44 108.1 . . ?
 C43 C44 C45 111.30(9) . . ?
 C43 C44 C46 111.14(11) . . ?
 C45 C44 H44 108.1 . . ?
 C46 C44 H44 108.1 . . ?
 C46 C44 C45 110.09(10) . . ?
 C44 C45 H45A 109.5 . . ?
 C44 C45 H45B 109.5 . . ?
 C44 C45 H45C 109.5 . . ?
 H45A C45 H45B 109.5 . . ?
 H45A C45 H45C 109.5 . . ?
 H45B C45 H45C 109.5 . . ?
 C44 C46 H46A 109.5 . . ?
 C44 C46 H46B 109.5 . . ?
 C44 C46 H46C 109.5 . . ?
 H46A C46 H46B 109.5 . . ?
 H46A C46 H46C 109.5 . . ?
 H46B C46 H46C 109.5 . . ?
 C39 C47 H47 108.1 . . ?
 C39 C47 C48 111.28(10) . . ?
 C39 C47 C49 111.65(10) . . ?
 C48 C47 H47 108.1 . . ?
 C48 C47 C49 109.51(10) . . ?
 C49 C47 H47 108.1 . . ?
 C47 C48 H48A 109.5 . . ?
 C47 C48 H48B 109.5 . . ?
 C47 C48 H48C 109.5 . . ?
 H48A C48 H48B 109.5 . . ?
 H48A C48 H48C 109.5 . . ?
 H48B C48 H48C 109.5 . . ?
 C47 C49 H49A 109.5 . . ?
 C47 C49 H49B 109.5 . . ?
 C47 C49 H49C 109.5 . . ?
 H49A C49 H49B 109.5 . . ?
 H49A C49 H49C 109.5 . . ?
 H49B C49 H49C 109.5 . . ?
 H50A C50 H50B 109.5 . . ?
 H50A C50 H50C 109.5 . . ?
 H50B C50 H50C 109.5 . . ?
 C51 C50 H50A 109.5 . . ?
 C51 C50 H50B 109.5 . . ?
 C51 C50 H50C 109.5 . . ?
 C50 C51 H51A 109.1 . . ?
 C50 C51 H51B 109.1 . . ?
 C50 C51 C52 112.5(4) . . ?
 H51A C51 H51B 107.8 . . ?
 C52 C51 H51A 109.1 . . ?
 C52 C51 H51B 109.1 . . ?
 C51 C52 H52A 109.2 . . ?
 C51 C52 H52B 109.2 . . ?
 C51 C52 C53 112.0(4) . . ?
 H52A C52 H52B 107.9 . . ?
 C53 C52 H52A 109.2 . . ?
 C53 C52 H52B 109.2 . . ?
 C52 C53 H53A 109.0 . . ?
 C52 C53 H53B 109.0 . . ?
 H53A C53 H53B 107.8 . . ?
 C54 C53 C52 112.7(3) . . ?
 C54 C53 H53A 109.0 . . ?
 C54 C53 H53B 109.0 . . ?
 C53 C54 H54A 109.5 . . ?
 C53 C54 H54B 109.5 . . ?
 C53 C54 H54C 109.5 . . ?
 H54A C54 H54B 109.5 . . ?
 H54A C54 H54C 109.5 . . ?
 H54B C54 H54C 109.5 . . ?

loop_
  _geom_torsion_atom_site_label_1
  _geom_torsion_atom_site_label_2
  _geom_torsion_atom_site_label_3
  _geom_torsion_atom_site_label_4
  _geom_torsion
  _geom_torsion_site_symmetry_1
  _geom_torsion_site_symmetry_2
  _geom_torsion_site_symmetry_3
  _geom_torsion_site_symmetry_4
  _geom_torsion_publ_flag
 N1 C11 C12 C13 -176.87(11) . . . . ?
 N1 C11 C12 C18 3.78(18) . . . . ?
 N1 C11 C16 C15 176.79(11) . . . . ?
 N1 C11 C16 C17 -1.06(16) . . . . ?
 N2 C3 C4 N3 0.72(11) . . . . ?
 N2 C3 C4 C5 -177.72(10) . . . . ?
 N2 C19 C20 C21 178.90(10) . . . . ?
 N2 C19 C20 C28 0.26(16) . . . . ?
 N2 C19 C24 C23 -179.03(10) . . . . ?
 N2 C19 C24 C25 0.85(16) . . . . ?
 N2 C31 C32 C33 141.18(11) . . . . ?
 N2 C31 C32 C37 -39.14(16) . . . . ?
 N3 C4 C5 C6 -34.99(16) . . . . ?
 N3 C4 C5 C10 149.54(11) . . . . ?
 N3 C31 C32 C33 -39.41(16) . . . . ?
 N3 C31 C32 C37 140.27(11) . . . . ?
 N3 C38 C39 C40 179.61(9) . . . . ?
 N3 C38 C39 C47 -1.14(15) . . . . ?
 N3 C38 C43 C42 -179.41(10) . . . . ?
 N3 C38 C43 C44 0.04(16) . . . . ?
 C1 N1 C11 C12 18.13(19) . . . . ?
 C1 N1 C11 C16 -161.82(12) . . . . ?
 C1 C2 C3 N2 -163.3(4) . . . . ?
 C1 C2 C3 C4 21.1(5) . . . . ?
 C2 C3 C4 N3 176.83(11) . . . . ?
 C2 C3 C4 C5 -1.6(2) . . . . ?
 C3 N2 C19 C20 -77.71(13) . . . . ?
 C3 N2 C19 C24 99.31(12) . . . . ?
 C3 N2 C31 N3 0.70(11) . . . . ?
 C3 N2 C31 C32 -179.79(10) . . . . ?
 C3 C4 C5 C6 143.16(11) . . . . ?
 C3 C4 C5 C10 -32.31(16) . . . . ?
 C4 N3 C31 N2 -0.23(11) . . . . ?
 C4 N3 C31 C32 -179.73(10) . . . . ?
 C4 N3 C38 C39 103.73(12) . . . . ?
 C4 N3 C38 C43 -75.65(13) . . . . ?
 C4 C5 C6 C7 -174.38(10) . . . . ?
 C4 C5 C10 C9 174.33(11) . . . . ?
 C5 C6 C7 C8 0.13(18) . . . . ?
 C6 C5 C10 C9 -1.40(17) . . . . ?
 C6 C7 C8 C9 -1.04(19) . . . . ?
 C7 C8 C9 C10 0.7(2) . . . . ?
 C8 C9 C10 C5 0.52(19) . . . . ?
 C10 C5 C6 C7 1.08(16) . . . . ?
 C11 C12 C13 C14 -0.78(19) . . . . ?
 C12 C11 C16 C15 -3.16(17) . . . . ?
 C12 C11 C16 C17 178.99(11) . . . . ?
 C12 C13 C14 C15 -1.4(2) . . . . ?
 C13 C14 C15 C16 1.4(2) . . . . ?
 C14 C15 C16 C11 0.9(2) . . . . ?
 C14 C15 C16 C17 178.74(13) . . . . ?
 C16 C11 C12 C13 3.07(17) . . . . ?
 C16 C11 C12 C18 -176.28(11) . . . . ?
 C18 C12 C13 C14 178.58(13) . . . . ?
 C19 N2 C3 C2 -1.95(15) . . . . ?
 C19 N2 C3 C4 174.69(9) . . . . ?
 C19 N2 C31 N3 -174.50(9) . . . . ?
 C19 N2 C31 C32 5.00(17) . . . . ?
 C19 C20 C21 C22 -0.58(18) . . . . ?
 C19 C20 C28 C29 114.95(12) . . . . ?
 C19 C20 C28 C30 -122.22(12) . . . . ?
 C19 C24 C25 C26 -133.44(11) . . . . ?
 C19 C24 C25 C27 103.81(12) . . . . ?
 C20 C19 C24 C23 -2.19(16) . . . . ?
 C20 C19 C24 C25 177.68(10) . . . . ?
 C20 C21 C22 C23 -0.6(2) . . . . ?
 C21 C20 C28 C29 -63.66(14) . . . . ?
 C21 C20 C28 C30 59.17(15) . . . . ?
 C21 C22 C23 C24 0.40(19) . . . . ?
 C22 C23 C24 C19 0.93(17) . . . . ?
 C22 C23 C24 C25 -178.95(11) . . . . ?
 C23 C24 C25 C26 46.44(15) . . . . ?
 C23 C24 C25 C27 -76.32(14) . . . . ?
 C24 C19 C20 C21 2.02(17) . . . . ?
 C24 C19 C20 C28 -176.62(11) . . . . ?
 C28 C20 C21 C22 178.12(11) . . . . ?
 C31 N2 C3 C2 -177.53(10) . . . . ?
 C31 N2 C3 C4 -0.90(11) . . . . ?
 C31 N2 C19 C20 97.02(13) . . . . ?
 C31 N2 C19 C24 -85.96(14) . . . . ?
 C31 N3 C4 C3 -0.33(12) . . . . ?
 C31 N3 C4 C5 178.13(10) . . . . ?
 C31 N3 C38 C39 -71.68(13) . . . . ?
 C31 N3 C38 C43 108.93(12) . . . . ?
 C31 C32 C33 C34 -179.88(10) . . . . ?
 C31 C32 C37 C36 -179.97(10) . . . . ?
 C32 C33 C34 C35 -0.03(18) . . . . ?
 C33 C32 C37 C36 -0.28(17) . . . . ?
 C33 C34 C35 C36 -0.54(19) . . . . ?
 C34 C35 C36 C37 0.70(19) . . . . ?
 C35 C36 C37 C32 -0.29(18) . . . . ?
 C37 C32 C33 C34 0.44(17) . . . . ?
 C38 N3 C4 C3 -176.28(9) . . . . ?
 C38 N3 C4 C5 2.18(16) . . . . ?
 C38 N3 C31 N2 175.78(9) . . . . ?
 C38 N3 C31 C32 -3.73(16) . . . . ?
 C38 C39 C40 C41 -0.01(17) . . . . ?
 C38 C39 C47 C48 -117.46(12) . . . . ?
 C38 C39 C47 C49 119.84(12) . . . . ?
 C38 C43 C44 C45 -115.81(12) . . . . ?
 C38 C43 C44 C46 121.10(12) . . . . ?
 C39 C38 C43 C42 1.25(16) . . . . ?
 C39 C38 C43 C44 -179.31(10) . . . . ?
 C39 C40 C41 C42 0.80(18) . . . . ?
 C40 C39 C47 C48 61.77(14) . . . . ?
 C40 C39 C47 C49 -60.93(14) . . . . ?
 C40 C41 C42 C43 -0.59(19) . . . . ?
 C41 C42 C43 C38 -0.40(17) . . . . ?
 C41 C42 C43 C44 -179.86(11) . . . . ?
 C42 C43 C44 C45 63.62(14) . . . . ?
 C42 C43 C44 C46 -59.47(14) . . . . ?
 C43 C38 C39 C40 -1.05(16) . . . . ?
 C43 C38 C39 C47 178.21(10) . . . . ?
 C47 C39 C40 C41 -179.29(11) . . . . ?
 C50 C51 C52 C53 175.9(5) . . . . ?
 C51 C52 C53 C54 -175.8(4) . . . . ?

_shelx_res_file
;
TITL pa5_29_cg_a.res in P-1
    pa5_29_cg.res
    created by SHELXL-2018/3 at 14:55:44 on 04-Nov-2020
REM Old TITL PA5_29_CG in P-1
REM SHELXT solution in P-1
REM R1 0.142, Rweak 0.007, Alpha 0.034, Orientation as input
REM Formula found by SHELXT: C103 N8
CELL 0.71073 11.8302 13.7363 14.8635 105.869 108.142 97.134
ZERR 2 0.0012 0.0013 0.0013 0.003 0.003 0.004
LATT 1
SFAC C H N
UNIT 103 118 6
DFIX 1.52 C50 C51 C51 C52 C52 C53 C53 C54
SIMU C50 > C54
DANG 2.54 C50 C52 C51 C53 C52 C54
SADI C50 C51 C51 C52 C52 C53 C53 C54
RIGU C50 > C54
SADI 0.04 C50 C52 C52 C54 C51 C53

L.S. 4
PLAN  11
SIZE 0.255 0.28 0.348
TEMP -173.15
CONF
BOND $H
list 4
fmap 2
MORE -1
ACTA
OMIT -1 1 0
OMIT -1 0 1
OMIT 5 1 15
OMIT 1 -1 1
OMIT 0 1 1
OMIT -1 1 1
REM <olex2.extras>
REM <HklSrc "%.\\PA5_29_CG.hkl">
REM </olex2.extras>

WGHT    0.040900    0.856000
FVAR       0.51912
N1    3    0.451718    0.759613    0.711965    11.00000    0.02614    0.02509 =
         0.01687    0.00631    0.00761    0.00631
N2    3    0.331010    0.661851    0.345819    11.00000    0.01479    0.01766 =
         0.01571    0.00662    0.00595    0.00329
N3    3    0.488224    0.716333    0.312073    11.00000    0.01577    0.01625 =
         0.01454    0.00569    0.00585    0.00327
C1    1    0.424912    0.738364    0.617876    11.00000    0.01890    0.01707 =
         0.02062    0.00630    0.00809    0.00354
C2    1    0.411990    0.715683    0.528552    11.00000    0.01966    0.02319 =
         0.01960    0.00832    0.00831    0.00550
C3    1    0.426733    0.712284    0.439207    11.00000    0.01803    0.01565 =
         0.01569    0.00570    0.00573    0.00481
C4    1    0.527369    0.746199    0.416746    11.00000    0.01822    0.01525 =
         0.01423    0.00500    0.00573    0.00392
C5    1    0.651058    0.800014    0.488121    11.00000    0.01883    0.01773 =
         0.01705    0.00779    0.00471    0.00169
C6    1    0.757821    0.783579    0.470140    11.00000    0.02012    0.02420 =
         0.02224    0.00929    0.00603    0.00371
AFIX  43
H6    2    0.752228    0.739846    0.406408    11.00000   -1.20000
AFIX   0
C7    1    0.871985    0.830992    0.545164    11.00000    0.01805    0.03417 =
         0.03104    0.01556    0.00461    0.00283
AFIX  43
H7    2    0.943717    0.819410    0.532091    11.00000   -1.20000
AFIX   0
C8    1    0.882132    0.894890    0.638695    11.00000    0.02433    0.03493 =
         0.02534    0.01197   -0.00193   -0.00413
AFIX  43
H8    2    0.960278    0.926079    0.689891    11.00000   -1.20000
AFIX   0
C9    1    0.777491    0.912901    0.656915    11.00000    0.03312    0.03168 =
         0.01888    0.00323    0.00351   -0.00458
AFIX  43
H9    2    0.783941    0.957273    0.720654    11.00000   -1.20000
AFIX   0
C10   1    0.663151    0.866481    0.582559    11.00000    0.02500    0.02450 =
         0.02118    0.00510    0.00767    0.00071
AFIX  43
H10   2    0.592068    0.879943    0.595853    11.00000   -1.20000
AFIX   0
C11   1    0.379851    0.786377    0.768674    11.00000    0.03468    0.01690 =
         0.01982    0.00822    0.01354    0.00665
C12   1    0.251015    0.768687    0.730136    11.00000    0.03373    0.02071 =
         0.02837    0.01175    0.01805    0.00723
C13   1    0.191471    0.804647    0.795990    11.00000    0.04479    0.03214 =
         0.04526    0.01358    0.03148    0.01131
AFIX  43
H13   2    0.104983    0.793823    0.770517    11.00000   -1.20000
AFIX   0
C14   1    0.255328    0.855751    0.897611    11.00000    0.06742    0.03753 =
         0.04286    0.00778    0.04195    0.01226
AFIX  43
H14   2    0.213194    0.881002    0.940859    11.00000   -1.20000
AFIX   0
C15   1    0.381193    0.869608    0.935431    11.00000    0.06871    0.03005 =
         0.02441    0.00467    0.02591    0.00544
AFIX  43
H15   2    0.424761    0.903268    1.005286    11.00000   -1.20000
AFIX   0
C16   1    0.445068    0.835239    0.873198    11.00000    0.04648    0.02073 =
         0.01974    0.00759    0.01347    0.00485
C17   1    0.581768    0.852410    0.914300    11.00000    0.04841    0.02890 =
         0.01848    0.00720    0.00308    0.00505
AFIX 137
H17A  2    0.617570    0.898000    0.884953    11.00000   -1.50000
H17B  2    0.604749    0.785488    0.897383    11.00000   -1.50000
H17C  2    0.612189    0.884945    0.987386    11.00000   -1.50000
AFIX   0
C18   1    0.177437    0.711474    0.620886    11.00000    0.02414    0.03237 =
         0.02992    0.01446    0.01253    0.00607
AFIX 137
H18A  2    0.090174    0.699840    0.610344    11.00000   -1.50000
H18B  2    0.199072    0.644397    0.600516    11.00000   -1.50000
H18C  2    0.195143    0.752921    0.580645    11.00000   -1.50000
AFIX   0
C19   1    0.213805    0.608438    0.339231    11.00000    0.01546    0.01934 =
         0.01600    0.00636    0.00612    0.00231
C20   1    0.205374    0.509811    0.350272    11.00000    0.01809    0.02139 =
         0.02023    0.00890    0.00638    0.00478
C21   1    0.092778    0.459848    0.345570    11.00000    0.02146    0.02417 =
         0.03127    0.01562    0.00817    0.00325
AFIX  43
H21   2    0.083446    0.392711    0.352107    11.00000   -1.20000
AFIX   0
C22   1   -0.005914    0.506329    0.331521    11.00000    0.01757    0.03096 =
         0.03486    0.01720    0.00932    0.00280
AFIX  43
H22   2   -0.082163    0.470643    0.327912    11.00000   -1.20000
AFIX   0
C23   1    0.006060    0.604442    0.322727    11.00000    0.01693    0.02755 =
         0.02839    0.01292    0.00748    0.00661
AFIX  43
H23   2   -0.062190    0.635576    0.313543    11.00000   -1.20000
AFIX   0
C24   1    0.117094    0.658617    0.327136    11.00000    0.01837    0.02084 =
         0.01774    0.00778    0.00555    0.00455
C25   1    0.129119    0.767023    0.319130    11.00000    0.01903    0.02094 =
         0.02827    0.01107    0.00833    0.00631
AFIX  13
H25   2    0.218049    0.799416    0.341602    11.00000   -1.20000
AFIX   0
C26   1    0.074784    0.836247    0.386411    11.00000    0.03232    0.02511 =
         0.02846    0.00820    0.01008    0.01010
AFIX 137
H26A  2   -0.014106    0.810508    0.360711    11.00000   -1.50000
H26B  2    0.094168    0.907783    0.386590    11.00000   -1.50000
H26C  2    0.109552    0.834707    0.454949    11.00000   -1.50000
AFIX   0
C27   1    0.067627    0.762067    0.210032    11.00000    0.03579    0.03083 =
         0.03045    0.01787    0.01525    0.01596
AFIX 137
H27A  2    0.105049    0.720157    0.167787    11.00000   -1.50000
H27B  2    0.078333    0.832547    0.206234    11.00000   -1.50000
H27C  2   -0.019760    0.730333    0.186420    11.00000   -1.50000
AFIX   0
C28   1    0.312147    0.457113    0.369024    11.00000    0.02055    0.02263 =
         0.02949    0.01336    0.00836    0.00698
AFIX  13
H28   2    0.384088    0.502924    0.368061    11.00000   -1.20000
AFIX   0
C29   1    0.345753    0.444695    0.472889    11.00000    0.02574    0.02867 =
         0.03340    0.01845    0.00678    0.00745
AFIX 137
H29A  2    0.275683    0.401255    0.475925    11.00000   -1.50000
H29B  2    0.367761    0.513243    0.524330    11.00000   -1.50000
H29C  2    0.415301    0.411649    0.484825    11.00000   -1.50000
AFIX   0
C30   1    0.284795    0.351027    0.288241    11.00000    0.03904    0.02799 =
         0.03778    0.01065    0.01174    0.01553
AFIX 137
H30A  2    0.264048    0.359772    0.222185    11.00000   -1.50000
H30B  2    0.215893    0.304222    0.289225    11.00000   -1.50000
H30C  2    0.356973    0.321325    0.301713    11.00000   -1.50000
AFIX   0
C31   1    0.369583    0.665719    0.270007    11.00000    0.01630    0.01529 =
         0.01658    0.00581    0.00635    0.00419
C32   1    0.296239    0.622125    0.162059    11.00000    0.01580    0.01972 =
         0.01607    0.00520    0.00580    0.00554
C33   1    0.309280    0.675494    0.096445    11.00000    0.02086    0.02242 =
         0.01878    0.00740    0.00635    0.00526
AFIX  43
H33   2    0.366181    0.740555    0.121686    11.00000   -1.20000
AFIX   0
C34   1    0.239266    0.633518   -0.005306    11.00000    0.02596    0.03319 =
         0.01875    0.01061    0.00790    0.00888
AFIX  43
H34   2    0.248489    0.670040   -0.049344    11.00000   -1.20000
AFIX   0
C35   1    0.156018    0.538613   -0.042902    11.00000    0.02304    0.03583 =
         0.01584    0.00371    0.00380    0.00685
AFIX  43
H35   2    0.107812    0.510458   -0.112434    11.00000   -1.20000
AFIX   0
C36   1    0.143270    0.484833    0.021279    11.00000    0.02016    0.02605 =
         0.02230    0.00066    0.00546    0.00121
AFIX  43
H36   2    0.086880    0.419429   -0.004585    11.00000   -1.20000
AFIX   0
C37   1    0.212517    0.526169    0.123046    11.00000    0.01955    0.02255 =
         0.02010    0.00538    0.00714    0.00269
AFIX  43
H37   2    0.202981    0.489013    0.166531    11.00000   -1.20000
AFIX   0
C38   1    0.565411    0.730742    0.255694    11.00000    0.01551    0.01803 =
         0.01384    0.00576    0.00534    0.00245
C39   1    0.601458    0.643840    0.208003    11.00000    0.01639    0.02037 =
         0.01792    0.00645    0.00545    0.00426
C40   1    0.675115    0.659949    0.153751    11.00000    0.02121    0.02737 =
         0.02296    0.00792    0.01075    0.00873
AFIX  43
H40   2    0.701723    0.603151    0.120197    11.00000   -1.20000
AFIX   0
C41   1    0.710147    0.757644    0.148015    11.00000    0.02232    0.03428 =
         0.02592    0.01370    0.01390    0.00543
AFIX  43
H41   2    0.759486    0.766660    0.109935    11.00000   -1.20000
AFIX   0
C42   1    0.674054    0.841982    0.197088    11.00000    0.02499    0.02401 =
         0.02363    0.01091    0.00994    0.00081
AFIX  43
H42   2    0.699579    0.908377    0.192792    11.00000   -1.20000
AFIX   0
C43   1    0.600574    0.830972    0.252913    11.00000    0.02051    0.01809 =
         0.01714    0.00623    0.00587    0.00220
C44   1    0.561692    0.924738    0.306106    11.00000    0.03346    0.01596 =
         0.02063    0.00652    0.01155    0.00485
AFIX  13
H44   2    0.512719    0.901814    0.343717    11.00000   -1.20000
AFIX   0
C45   1    0.481007    0.967941    0.230941    11.00000    0.03813    0.02106 =
         0.02484    0.00655    0.00956    0.01012
AFIX 137
H45A  2    0.525473    0.986871    0.190245    11.00000   -1.50000
H45B  2    0.459859    1.029653    0.267372    11.00000   -1.50000
H45C  2    0.406117    0.914916    0.187161    11.00000   -1.50000
AFIX   0
C46   1    0.672855    1.010141    0.381810    11.00000    0.04378    0.01993 =
         0.02594    0.00366    0.00400    0.00250
AFIX 137
H46A  2    0.724613    0.981462    0.428714    11.00000   -1.50000
H46B  2    0.645359    1.066966    0.419052    11.00000   -1.50000
H46C  2    0.719731    1.036648    0.346111    11.00000   -1.50000
AFIX   0
C47   1    0.565440    0.536190    0.214209    11.00000    0.02120    0.01811 =
         0.02552    0.00736    0.01077    0.00639
AFIX  13
H47   2    0.512726    0.540386    0.255635    11.00000   -1.20000
AFIX   0
C48   1    0.678085    0.499508    0.265296    11.00000    0.02727    0.02535 =
         0.03107    0.01213    0.00997    0.01113
AFIX 137
H48A  2    0.729598    0.492287    0.224533    11.00000   -1.50000
H48B  2    0.651924    0.432204    0.272109    11.00000   -1.50000
H48C  2    0.724710    0.550593    0.331889    11.00000   -1.50000
AFIX   0
C49   1    0.491960    0.455928    0.110152    11.00000    0.02647    0.02149 =
         0.03227    0.00329    0.00830    0.00426
AFIX 137
H49A  2    0.420750    0.479976    0.077089    11.00000   -1.50000
H49B  2    0.464575    0.389114    0.117368    11.00000   -1.50000
H49C  2    0.543636    0.447444    0.069554    11.00000   -1.50000
AFIX   0

PART -1
C50   1    0.942012    0.823879    0.960118    10.50000    0.07487    0.04516 =
         0.05861    0.00212    0.00923    0.01094
AFIX 137
H50A  2    0.976213    0.811506    0.906929    10.50000   -1.50000
H50B  2    0.854905    0.822332    0.931342    10.50000   -1.50000
H50C  2    0.952091    0.769647    0.991299    10.50000   -1.50000
AFIX   0
C51   1    1.008253    0.929292    1.038668    10.50000    0.06391    0.04214 =
         0.03780    0.01112    0.01676    0.01416
AFIX  23
H51A  2    1.095914    0.929986    1.068226    10.50000   -1.20000
H51B  2    0.974844    0.940520    1.093081    10.50000   -1.20000
AFIX   0
C52   1    0.996094    1.018006    0.995731    10.50000    0.04193    0.04953 =
         0.02844    0.01802    0.01189    0.01603
AFIX  23
H52A  2    0.908420    1.014443    0.961913    10.50000   -1.20000
H52B  2    1.035000    1.009754    0.944826    10.50000   -1.20000
AFIX   0
C53   1    1.055351    1.124074    1.076851    10.50000    0.04596    0.04743 =
         0.03223    0.01990    0.01236    0.01079
AFIX  23
H53A  2    1.020799    1.129952    1.130301    10.50000   -1.20000
H53B  2    1.144128    1.129328    1.107215    10.50000   -1.20000
AFIX   0
C54   1    1.036089    1.213782    1.036635    10.50000    0.05666    0.05554 =
         0.04282    0.02650    0.00993    0.00742
AFIX 137
H54A  2    1.080372    1.214393    0.990900    10.50000   -1.50000
H54B  2    1.066784    1.279571    1.092644    10.50000   -1.50000
H54C  2    0.948706    1.205155    1.000458    10.50000   -1.50000
AFIX   0
HKLF 4


REM  pa5_29_cg_a.res in P-1
REM wR2 = 0.115378, GooF = S = 1.03456, Restrained GooF = 1.03199 for all data
REM R1 = 0.045088 for 9300 Fo > 4sig(Fo) and 0.065818 for all 12012 data
REM 526 parameters refined using 61 restraints

END

WGHT      0.0405      0.8567

REM Highest difference peak  0.305,  deepest hole -0.272,  1-sigma level  0.044
Q1    1   0.3305  0.6406  0.2135  11.00000  0.05    0.30
Q2    1   0.1727  0.6415  0.3411  11.00000  0.05    0.29
Q3    1   0.6023  0.6900  0.2454  11.00000  0.05    0.28
Q4    1   0.5646  0.7776  0.2413  11.00000  0.05    0.28
Q5    1   0.5942  0.7681  0.4516  11.00000  0.05    0.27
Q6    1   0.1269  0.7124  0.3210  11.00000  0.05    0.27
Q7    1   0.4747  0.7634  0.4352  11.00000  0.05    0.27
Q8    1   0.7001  0.7766  0.4790  11.00000  0.05    0.26
Q9    1   0.4859  0.7071  0.4261  11.00000  0.05    0.25
Q10   1   0.2644  0.4846  0.3552  11.00000  0.05    0.25
Q11   1   0.0522  0.4954  0.3452  11.00000  0.05    0.25
;
_shelx_res_checksum                61726
_shelx_hkl_file
;
  -2   0   0   14.30    1.30
  -2   0   0   15.00    1.10
  -2   0   0   10.60    1.90
   2   0   0   13.60    1.00
   2   0   0   12.30    2.20
   2   0   0   15.10    1.40
  -3   0   0  238.38    5.60
  -3   0   0  231.48    6.30
   3   0   0  225.58    6.30
   3   0   0  230.38    5.60
  -4   0   0   22.80    2.20
  -4   0   0   20.00    3.30
  -4   0   0   22.30    2.20
   4   0   0   23.70    1.70
   4   0   0   26.40    2.20
  -5   0   0    4.70    1.10
  -5   0   0    4.30    2.70
  -5   0   0    5.00    1.50
   5   0   0    3.90    1.10
   5   0   0    3.70    2.30
   5   0   0    6.00    1.60
  -6   0   0    1.30    2.20
  -6   0   0    0.40    0.80
  -6   0   0    1.00    1.10
   6   0   0    0.60    0.80
   6   0   0   -0.10    1.80
   6   0   0   -0.10    1.00
  -7   0   0    8.20    3.30
  -7   0   0   14.70    2.00
  -7   0   0   11.30    2.20
   7   0   0   12.70    1.90
   7   0   0   12.20    3.50
   7   0   0   12.40    2.40
  -8   0   0   29.90    5.80
  -8   0   0   19.40    2.40
  -8   0   0   25.30    3.60
   8   0   0   19.70    2.30
   8   0   0   14.70    2.60
   8   0   0   17.60    4.20
  -9   0   0  275.77    9.30
  -9   0   0  286.07   15.40
  -9   0   0  269.67   10.50
   9   0   0  278.47    9.10
   9   0   0  248.18   13.50
   9   0   0  284.17   11.10
 -10   0   0   29.90    4.20
 -10   0   0   30.90    6.70
 -10   0   0   40.50    3.80
  10   0   0   35.10    3.40
  10   0   0   34.90    4.90
  10   0   0   35.80    6.40
 -11   0   0   68.69    5.70
 -11   0   0   75.19    5.30
 -11   0   0   72.99    9.00
  11   0   0   70.69    8.20
  11   0   0   77.69    5.10
  11   0   0   66.29    6.00
 -12   0   0   32.80    4.10
 -12   0   0    4.50    4.40
 -12   0   0   35.80    5.00
  12   0   0   23.70    4.30
  12   0   0   19.70    3.30
  12   0   0   35.20    6.90
 -13   0   0   -3.50    1.60
 -13   0   0   -1.30    1.70
 -13   0   0    0.20    3.20
  13   0   0   -1.50    3.30
  13   0   0   -1.00    2.10
  13   0   0    1.00    1.80
 -14   0   0   18.30    3.70
 -14   0   0   14.20    3.70
  14   0   0   24.00    6.10
 -15   0   0    2.60    4.80
 -15   0   0    6.10    2.10
 -15   0   0   11.70    3.60
  15   0   0    7.90    2.70
  15   0   0   12.70    5.70
  15  -1   0   -2.20    4.10
  15  -1   0    5.20    3.60
 -15   1   0    4.40    8.70
 -15   1   0    1.90    2.90
  14  -1   0   53.69    5.10
  14  -1   0   50.29    8.40
 -14   1   0   54.09    5.70
 -14   1   0   47.00    5.50
 -14   1   0   60.49   10.50
  13  -1   0    0.70    3.10
  13  -1   0    2.00    2.50
  13  -1   0    1.00    1.70
 -13   1   0   -0.50    1.90
 -13   1   0    1.20    3.60
 -13   1   0   -1.00    1.90
  12  -1   0   18.10    6.60
  12  -1   0    5.60    2.10
  12  -1   0    7.00    2.60
 -12   1   0   10.00    4.70
 -12   1   0    2.20    2.10
 -12   1   0    2.40    2.10
  11  -1   0   -1.10    4.20
  11  -1   0    3.20    2.10
  11  -1   0    3.00    1.70
 -11   1   0   -0.40    3.40
 -11   1   0    2.60    1.80
 -11   1   0    0.40    1.60
  10  -1   0   13.50    2.40
  10  -1   0   17.90    4.70
  10  -1   0   14.00    3.20
 -10   1   0   17.00    2.80
 -10   1   0   22.90    6.20
   9  -1   0    0.10    1.00
   9  -1   0   -0.70    2.00
   9  -1   0    1.80    1.50
  -9   1   0    1.40    3.00
  -9   1   0    1.40    1.30
  -9   1   0    0.00    1.40
   8  -1   0   22.40    3.10
   8  -1   0   27.80    4.70
   8  -1   0   30.60    2.70
  -8   1   0   27.70    5.50
  -8   1   0   30.60    2.80
  -8   1   0   30.60    3.30
   7  -1   0   -0.30    1.70
   7  -1   0   -1.00    0.90
   7  -1   0   -0.10    0.70
  -7   1   0   -0.10    0.80
  -7   1   0    0.20    2.10
  -7   1   0    0.20    0.90
   6  -1   0  223.38    7.70
   6  -1   0  225.98    6.70
   6  -1   0  229.88   10.10
  -6   1   0  230.68    7.80
  -6   1   0  220.98    6.90
  -6   1   0  231.68    4.70
  -6   1   0  213.58   11.10
   5  -1   0    1.40    1.80
   5  -1   0    2.10    1.20
   5  -1   0    1.90    0.90
  -5   1   0    2.50    1.30
  -5   1   0    3.00    2.50
  -5   1   0    3.60    1.00
   4  -1   0  291.57    7.20
   4  -1   0  313.07   10.20
   4  -1   0  289.97    7.90
  -4   1   0  303.77    8.00
  -4   1   0  306.97   11.00
   3  -1   0   38.10    2.20
   3  -1   0   37.20    1.90
   3  -1   0   39.90    3.20
  -3   1   0   44.80    2.30
  -3   1   0   40.10    3.60
   2  -1   0   79.59    2.60
   2  -1   0   77.39    2.50
  -2   1   0   79.99    2.60
  -2   1   0   80.29    2.60
  -2   1   0   81.99    3.60
   1  -1   0    0.50    0.30
   1  -1   0    0.10    0.10
   1  -1   0    0.30    0.20
   1  -1   0   -0.10    0.10
  -1   1   0   -0.10    0.10
  -1   1   0    0.00    0.10
  -1   1   0    0.20    0.30
  -1   1   0   -0.20    0.20
  -1  -1   0  101.39    2.60
  -1  -1   0  102.89    2.00
  -2  -1   0 1432.96   26.10
  -2  -1   0 1468.75   29.10
   2   1   0 1356.06   26.10
   2   1   0 1402.66   29.20
  -3  -1   0   42.80    3.90
  -3  -1   0   35.00    1.80
  -3  -1   0   36.00    2.30
   3   1   0   35.40    1.90
   3   1   0   38.70    4.00
   3   1   0   34.50    2.40
  -4  -1   0  449.56   11.20
  -4  -1   0  441.66   11.00
  -4  -1   0  434.06   14.10
   4   1   0  454.95   11.30
   4   1   0  445.56   10.10
   4   1   0  442.66   14.60
  -5  -1   0   31.10    2.80
  -5  -1   0   27.60    4.20
  -5  -1   0   30.10    2.20
   5   1   0   30.50    2.90
   5   1   0   24.80    4.40
   5   1   0   31.20    2.20
  -6  -1   0   69.59    4.20
  -6  -1   0   69.99    3.50
  -6  -1   0   65.19    6.40
   6   1   0   67.09    3.40
   6   1   0   57.59    6.10
   6   1   0   68.59    4.30
  -7  -1   0   16.10    4.00
  -7  -1   0   17.90    2.10
  -7  -1   0   18.30    3.00
   7   1   0   13.50    3.90
   7   1   0   16.10    2.60
   7   1   0   15.00    2.00
  -8  -1   0    2.40    2.80
  -8  -1   0    1.60    1.20
  -8  -1   0   -0.40    1.10
   8   1   0   -1.20    1.90
   8   1   0    0.80    1.10
   8   1   0   -1.00    1.10
  -9  -1   0   27.70    4.00
  -9  -1   0   23.20    2.80
  -9  -1   0   38.60    7.20
   9   1   0   30.90    3.10
   9   1   0   30.20    4.20
   9   1   0   28.40    5.70
 -10  -1   0  109.59   10.20
 -10  -1   0   99.79    5.60
 -10  -1   0   96.19    6.40
  10   1   0   96.39    6.70
  10   1   0  101.59    9.60
  10   1   0   95.89    5.50
 -11  -1   0    2.40    1.70
 -11  -1   0    3.50    2.10
 -11  -1   0    5.10    4.70
  11   1   0    3.80    3.20
  11   1   0    2.00    1.60
  11   1   0    1.80    1.80
 -12  -1   0    0.80    1.60
 -12  -1   0    2.10    3.10
 -12  -1   0    0.50    2.00
  12   1   0   -0.40    1.30
  12   1   0    2.10    3.40
  12   1   0   -1.20    1.60
 -13  -1   0   25.90    4.00
 -13  -1   0   23.70    5.10
  13   1   0   19.40    3.50
  13   1   0   23.80    6.10
  13   1   0   15.40    4.20
 -14  -1   0    1.00    2.80
 -14  -1   0    4.70    3.40
 -14  -1   0    0.40    1.50
 -14  -1   0    6.20    4.00
  14   1   0    5.70    2.20
  14   1   0    6.60    6.80
  15  -2   0   -2.50    3.60
 -15   2   0   -4.50    4.70
 -15   2   0    6.60    2.80
  14  -2   0    2.60    1.90
  14  -2   0    6.60    3.00
  14  -2   0    1.00    3.10
 -14   2   0    1.30    2.30
 -14   2   0    0.70    3.00
 -14   2   0    8.00    4.60
  13  -2   0    7.40    3.10
  13  -2   0    8.60    2.50
  13  -2   0   17.70    4.70
 -13   2   0    8.70    4.90
 -13   2   0    8.90    3.00
 -13   2   0   14.60    3.40
  12  -2   0    0.10    2.90
  12  -2   0    5.00    2.40
  12  -2   0   -0.60    1.30
 -12   2   0    5.50    2.50
 -12   2   0   -0.30    1.70
 -12   2   0   -0.10    3.40
  11  -2   0    3.90    2.30
  11  -2   0    3.70    3.00
  11  -2   0    3.20    1.60
 -11   2   0    3.50    2.10
 -11   2   0    7.30    2.30
 -11   2   0    3.60    3.70
  10  -2   0  293.37   11.40
  10  -2   0  301.77   14.30
  10  -2   0  320.37   10.20
 -10   2   0  325.07   11.10
 -10   2   0  317.87   11.60
 -10   2   0  339.67   18.30
   9  -2   0   71.69    6.60
   9  -2   0   67.09    4.10
   9  -2   0   72.69    5.10
  -9   2   0   68.59    4.50
  -9   2   0   68.29    4.90
  -9   2   0   69.59    8.30
   8  -2   0    0.10    1.70
   8  -2   0    1.00    1.00
   8  -2   0    0.10    1.10
  -8   2   0   -2.40    1.80
  -8   2   0   -0.20    1.00
  -8   2   0   -0.10    0.50
  -8   2   0    0.40    1.10
   7  -2   0    0.80    1.10
   7  -2   0    0.20    0.90
   7  -2   0    2.20    1.90
  -7   2   0    0.50    1.00
  -7   2   0    0.30    2.30
  -7   2   0    1.10    1.10
   6  -2   0  607.24   15.20
   6  -2   0  630.14   14.20
   6  -2   0  654.93   18.10
  -6   2   0  634.84   15.40
  -6   2   0  635.04   14.80
  -6   2   0  625.44   20.10
   5  -2   0   95.39    3.70
   5  -2   0   98.09    5.60
   5  -2   0  100.59    5.10
  -5   2   0   92.69    4.00
  -5   2   0   92.99    4.20
  -5   2   0   96.89    6.50
   4  -2   0   63.99    4.10
   4  -2   0   67.29    2.90
   4  -2   0   70.29    3.20
  -4   2   0   65.59    3.10
  -4   2   0   69.49    3.20
  -4   2   0   68.99    4.80
   3  -2   0    0.60    0.70
   3  -2   0    1.70    1.10
   3  -2   0    1.10    0.70
  -3   2   0    1.00    0.80
  -3   2   0    1.00    0.80
  -3   2   0   -0.10    1.00
   2  -2   0    7.20    0.90
   2  -2   0    6.00    1.10
   2  -2   0    7.50    1.00
   2  -2   0    6.40    0.70
  -2   2   0    9.80    1.50
  -2   2   0    7.90    1.10
  -2   2   0    7.30    0.80
  -2   2   0    7.10    1.00
   1  -2   0 3061.39   66.29
   1  -2   0 3034.00   66.29
  -1   2   0 3002.40   65.79
  -1   2   0 3107.39   66.59
   0  -2   0 1278.57   24.60
   0  -2   0 1345.57   23.50
   0  -2   0 1333.27   24.90
   0   2   0 1317.87   24.70
   0   2   0 1354.26   23.50
   0   2   0 1330.67   25.00
   0   2   0 1309.17   24.30
  -1  -2   0   16.50    1.90
  -1  -2   0   18.00    1.40
  -1  -2   0   18.30    1.40
   1   2   0   18.30    1.50
   1   2   0   18.60    2.00
   1   2   0   14.80    1.30
  -2  -2   0   54.99    3.60
  -2  -2   0   51.59    2.20
  -2  -2   0   61.39    2.70
  -2  -2   0   55.79    1.40
   2   2   0   53.89    3.80
   2   2   0   53.09    2.30
  -3  -2   0    3.90    0.80
  -3  -2   0    4.40    1.30
  -3  -2   0    4.10    1.80
   3   2   0    6.00    1.50
   3   2   0    4.00    1.00
  -4  -2   0  116.29    4.10
  -4  -2   0  122.39    5.00
   4   2   0  119.29    5.10
   4   2   0  118.29    4.30
   4   2   0  122.69    7.50
  -5  -2   0   56.39    3.70
  -5  -2   0   53.69    2.90
  -5  -2   0   55.89    5.30
   5   2   0   60.39    3.90
   5   2   0   55.39    3.10
   5   2   0   49.90    5.70
  -6  -2   0  250.27    8.70
  -6  -2   0  236.88    7.20
  -6  -2   0  254.77   11.90
   6   2   0  241.78    7.50
   6   2   0  245.38   12.50
   6   2   0  236.28    8.70
  -7  -2   0   26.00    2.50
  -7  -2   0   26.10    3.10
  -7  -2   0   28.30    5.00
   7   2   0   18.30    4.70
   7   2   0   30.80    3.40
   7   2   0   22.50    2.40
  -8  -2   0   25.60    5.10
  -8  -2   0   20.30    3.00
  -8  -2   0   24.20    2.60
   8   2   0   25.10    2.70
   8   2   0   22.60    5.40
  -9  -2   0   13.90    4.60
  -9  -2   0   17.30    2.60
  -9  -2   0   15.80    3.30
   9   2   0   18.10    2.80
   9   2   0   16.30    4.90
 -10  -2   0   31.90    6.20
 -10  -2   0   34.50    4.20
 -10  -2   0   35.40    3.70
  10   2   0   36.40   11.00
  10   2   0   32.20    4.60
  10   2   0   37.10    3.70
 -11  -2   0    0.70    2.90
 -11  -2   0    2.90    1.70
 -11  -2   0    2.00    2.00
  11   2   0   -0.60    2.00
  11   2   0    0.40    1.60
 -12  -2   0   -0.30    3.10
 -12  -2   0    1.10    1.90
 -12  -2   0    0.60    2.10
 -12  -2   0    1.00    1.20
  12   2   0    0.30    1.70
  12   2   0   -2.20    2.90
  12   2   0    1.10    2.40
 -13  -2   0   33.60    4.60
 -13  -2   0   28.20    4.80
 -13  -2   0   26.80    6.70
  13   2   0   34.10    4.70
  13   2   0   25.60    6.60
 -14  -2   0   33.10    5.60
 -14  -2   0   27.40    6.70
 -14  -2   0   30.40    3.30
  14   2   0   13.10    6.50
  14   2   0   18.90    3.70
  15  -3   0   52.79    8.30
 -15   3   0   30.60    8.20
 -15   3   0   27.30    5.00
 -15   3   0   40.50    5.80
  14  -3   0   40.50    4.60
  14  -3   0   46.90    7.30
  14  -3   0   34.00    5.40
 -14   3   0   34.20    5.30
 -14   3   0   33.90    5.10
 -14   3   0   21.70    6.90
  13  -3   0   -1.20    1.30
  13  -3   0    0.10    2.00
  13  -3   0    3.40    2.90
 -13   3   0   -0.50    1.90
 -13   3   0    2.00    3.80
 -13   3   0   -1.40    1.50
  12  -3   0    4.10    1.70
  12  -3   0    3.10    3.00
  12  -3   0    1.50    1.90
 -12   3   0    3.20    2.00
 -12   3   0    6.00    2.40
  11  -3   0   20.60    3.00
  11  -3   0   24.20    4.00
  11  -3   0   29.30    5.60
 -11   3   0   19.00    6.20
 -11   3   0   19.00    3.50
 -11   3   0   27.80    3.90
  10  -3   0   68.19    5.30
  10  -3   0   65.99    4.30
  10  -3   0   69.19    6.70
 -10   3   0   63.89    5.00
 -10   3   0   74.89    9.30
 -10   3   0   66.99    2.60
 -10   3   0   66.09    5.10
   9  -3   0   86.29    5.30
   9  -3   0   84.39    4.60
   9  -3   0   84.89    6.90
  -9   3   0   88.39    5.20
  -9   3   0   90.19    9.30
  -9   3   0   87.29    5.50
   8  -3   0    0.00    0.90
   8  -3   0   -0.10    1.60
   8  -3   0    0.20    1.00
  -8   3   0    0.40    1.10
  -8   3   0    0.30    2.50
  -8   3   0   -0.30    1.00
   7  -3   0    8.70    2.60
   7  -3   0    9.40    1.80
   7  -3   0    9.40    1.60
  -7   3   0    8.70    1.90
  -7   3   0    8.20    1.80
  -7   3   0    4.90    2.60
   6  -3   0    4.30    1.30
   6  -3   0    3.40    1.10
   6  -3   0    5.00    2.00
  -6   3   0    7.60    2.70
  -6   3   0    1.60    1.30
  -6   3   0    4.90    1.50
   5  -3   0   63.09    2.40
   5  -3   0   57.39    4.10
   5  -3   0   58.29    3.20
   5  -3   0   58.99    3.10
  -5   3   0   59.59    5.00
  -5   3   0   57.79    3.30
  -5   3   0   59.49    3.30
   4  -3   0   40.20    2.80
   4  -3   0   36.30    2.30
   4  -3   0   40.10    1.80
   4  -3   0   44.10    3.30
  -4   3   0   40.80    2.50
  -4   3   0   39.90    2.60
  -4   3   0   38.10    3.50
   3  -3   0 2113.59   39.00
   3  -3   0 2112.69   39.40
   3  -3   0 2103.49   38.00
   3  -3   0 2076.79   40.40
  -3   3   0 2101.39   38.90
  -3   3   0 2132.79   40.80
  -3   3   0 2116.19   38.00
  -3   3   0 2098.09   39.70
   2  -3   0  115.99    4.20
   2  -3   0  117.99    4.00
   2  -3   0  120.29    3.10
  -2   3   0  113.79    4.10
  -2   3   0  119.69    3.50
  -2   3   0  118.99    3.10
  -2   3   0  117.99    4.20
   1  -3   0    0.60    0.70
   1  -3   0   -0.10    0.70
   1  -3   0    0.20    0.60
  -1   3   0    0.60    0.80
  -1   3   0    0.30    0.70
  -1   3   0    0.60    0.50
   0  -3   0 1692.23   32.60
   0  -3   0 1715.23   32.20
   0   3   0 1706.33   32.70
   0   3   0 1744.53   30.40
   0   3   0 1674.63   32.20
   0   3   0 1744.83   31.70
  -1  -3   0 1423.26   27.00
  -1  -3   0 1417.26   28.10
   1   3   0 1404.06   27.10
   1   3   0 1384.36   28.40
   1   3   0 1434.76   27.00
  -2  -3   0    8.60    1.80
  -2  -3   0    7.70    1.40
  -2  -3   0    5.20    0.90
   2   3   0    6.40    1.10
   2   3   0    5.90    2.10
   2   3   0    8.20    1.50
  -3  -3   0  456.15   11.40
  -3  -3   0  461.85   10.70
  -3  -3   0  462.95   13.40
  -3  -3   0  462.65    8.70
   3   3   0  449.16   11.50
   3   3   0  464.55   14.30
   3   3   0  474.05   10.90
  -4  -3   0  370.96   10.20
  -4  -3   0  374.36   12.50
  -4  -3   0  364.46    7.30
  -4  -3   0  347.47    8.90
   4   3   0  322.97   10.50
   4   3   0  360.36   13.50
   4   3   0  378.86   10.60
  -5  -3   0   71.69    2.30
  -5  -3   0   72.19    5.90
  -5  -3   0   70.69    4.20
  -5  -3   0   76.29    3.50
   5   3   0   66.29    6.40
   5   3   0   72.99    3.70
  -6  -3   0  114.69    5.70
  -6  -3   0  110.49    4.70
  -6  -3   0  102.49    7.50
   6   3   0  106.59    8.50
   6   3   0  106.09    5.80
   6   3   0  110.99    4.90
  -7  -3   0   30.70    5.50
  -7  -3   0   26.90    3.20
  -7  -3   0   29.30    2.70
   7   3   0   31.50    5.90
   7   3   0   28.40    2.90
   7   3   0   35.90    4.70
  -8  -3   0    1.10    2.30
  -8  -3   0   -0.30    1.10
  -8  -3   0    0.30    1.30
   8   3   0   -0.80    0.90
   8   3   0    1.60    1.50
   8   3   0   -1.60    2.60
  -9  -3   0    4.70    1.20
  -9  -3   0    6.30    1.90
  -9  -3   0    2.50    2.80
  -9  -3   0    5.10    2.10
   9   3   0    5.20    1.80
   9   3   0    3.90    3.70
   9   3   0    4.50    2.30
 -10  -3   0    0.30    1.50
 -10  -3   0    3.00    2.70
 -10  -3   0   -0.80    0.90
 -10  -3   0    1.20    1.60
  10   3   0   -1.00    1.40
  10   3   0   -0.80    1.20
  10   3   0    3.20    3.60
 -11  -3   0   19.50    3.90
 -11  -3   0   16.10    2.90
 -11  -3   0   18.10    2.20
 -11  -3   0   18.60    5.20
  11   3   0    8.00    4.90
  11   3   0   17.90    3.20
  11   3   0   16.90    3.60
 -12  -3   0    4.60    1.60
 -12  -3   0    2.80    1.90
 -12  -3   0   -1.00    1.60
 -12  -3   0    0.10    3.50
  12   3   0    5.00    2.30
  12   3   0    4.60    2.50
  12   3   0   -1.30    2.90
 -13  -3   0    1.80    1.40
 -13  -3   0    2.40    2.70
 -13  -3   0    1.10    2.10
 -13  -3   0    9.10    5.00
  13   3   0    4.00    4.50
  13   3   0   12.70    3.00
 -14  -3   0    6.20    4.20
  14   3   0    5.60    2.80
  14   3   0    3.70    5.10
  15  -4   0    6.60    2.50
  15  -4   0    7.70    5.30
 -15   4   0    6.40    3.10
 -15   4   0   -2.50    5.70
 -15   4   0    0.20    2.60
  14  -4   0   65.49    5.40
  14  -4   0   56.39    6.40
  14  -4   0   73.09    8.10
  14  -4   0   64.89    4.10
 -14   4   0   57.19    6.30
 -14   4   0   77.99    6.60
 -14   4   0   41.00    8.90
  13  -4   0   67.69    5.20
  13  -4   0   58.29    5.70
  13  -4   0   60.39    3.70
  13  -4   0   61.99    7.20
 -13   4   0   55.19    5.50
 -13   4   0   59.59   10.20
 -13   4   0   59.39    5.60
  12  -4   0    8.70    2.30
  12  -4   0    8.50    2.90
  12  -4   0    8.00    1.70
  12  -4   0    6.70    3.40
 -12   4   0   10.20    2.80
 -12   4   0    9.30    6.10
 -12   4   0    8.80    2.70
 -12   4   0   10.20    1.20
  11  -4   0   10.10    2.20
  11  -4   0    4.30    2.20
  11  -4   0    9.30    1.70
  11  -4   0    8.30    3.20
 -11   4   0   11.80    2.70
 -11   4   0    9.80    2.60
 -11   4   0    7.40    4.60
 -11   4   0   13.30    1.40
  10  -4   0   57.19    4.90
  10  -4   0   54.29    3.90
  10  -4   0   54.29    5.80
 -10   4   0   58.39    4.80
 -10   4   0   51.99    2.40
 -10   4   0   60.09    8.80
 -10   4   0   54.69    4.70
   9  -4   0   -0.80    1.50
   9  -4   0    0.30    1.00
   9  -4   0    0.90    1.00
   9  -4   0    0.80    1.40
  -9   4   0   -0.80    1.00
  -9   4   0    2.30    1.50
  -9   4   0    1.00    2.50
   8  -4   0   10.30    1.40
   8  -4   0   10.60    2.70
   8  -4   0    7.90    1.80
   8  -4   0    9.00    2.00
  -8   4   0    9.10    2.10
  -8   4   0    7.90    3.40
  -8   4   0   12.80    2.60
   7  -4   0    0.20    0.60
   7  -4   0   -0.10    0.80
   7  -4   0    0.70    1.00
   7  -4   0    0.20    1.30
  -7   4   0   -1.60    1.40
  -7   4   0   -0.50    1.00
  -7   4   0   -0.40    0.80
   6  -4   0  171.18    6.50
   6  -4   0  173.08    6.00
   6  -4   0  172.68    7.60
   6  -4   0  175.58    6.30
  -6   4   0  169.78    7.20
  -6   4   0  169.68    8.80
  -6   4   0  180.58    6.30
   5  -4   0  185.18    6.00
   5  -4   0  180.28    4.80
   5  -4   0  190.78    6.20
  -5   4   0  185.58    6.10
  -5   4   0  176.68    9.60
  -5   4   0  175.38    6.40
   4  -4   0    5.80    1.30
   4  -4   0    7.20    1.40
   4  -4   0    8.60    1.00
  -4   4   0    7.40    1.40
  -4   4   0    5.50    1.70
  -4   4   0    8.00    1.60
   3  -4   0 2079.89   40.20
   3  -4   0 2057.39   37.90
   3  -4   0 2071.59   39.50
  -3   4   0 2049.79   39.90
  -3   4   0 2080.99   37.90
  -3   4   0 2121.09   40.70
  -3   4   0 2091.59   38.70
   2  -4   0 1911.51   34.30
   2  -4   0 1867.01   36.30
   2  -4   0 1877.91   36.10
  -2   4   0 1861.91   36.30
  -2   4   0 1903.51   34.40
  -2   4   0 1854.61   38.00
  -2   4   0 1893.61   34.40
   1  -4   0  521.85   12.30
   1  -4   0  536.65   12.20
   1  -4   0  536.15   11.20
  -1   4   0  518.35   12.50
  -1   4   0  539.55   12.40
   0  -4   0  495.95   11.50
   0  -4   0  510.95   12.10
   0  -4   0  493.65    9.60
   0   4   0  502.45   12.30
   0   4   0  498.45   11.70
   0   4   0  519.55   11.00
  -1  -4   0   33.40    2.20
  -1  -4   0   31.40    1.40
  -1  -4   0   35.70    2.80
   1   4   0   34.40    2.30
   1   4   0   33.40    2.20
   1   4   0   32.00    3.00
  -2  -4   0    8.10    1.30
  -2  -4   0   12.00    2.30
   2   4   0    9.10    1.50
   2   4   0    8.20    2.20
   2   4   0   12.80    2.00
  -3  -4   0   80.29    5.10
  -3  -4   0   77.49    3.50
  -3  -4   0   77.49    4.00
   3   4   0   84.89    4.30
   3   4   0   69.89    5.50
   3   4   0   80.29    3.90
  -4  -4   0  621.34   14.20
  -4  -4   0  620.94   11.80
  -4  -4   0  628.64   15.40
  -4  -4   0  652.53   18.20
   4   4   0  605.24   19.40
   4   4   0  643.44   15.90
   4   4   0  633.74   14.80
  -5  -4   0   86.89    2.50
  -5  -4   0   85.79    4.80
  -5  -4   0   82.39    6.10
  -5  -4   0   91.99    4.10
   5   4   0   88.69    7.40
   5   4   0   93.49    5.30
   5   4   0   85.89    4.30
  -6  -4   0    0.50    0.50
  -6  -4   0    1.50    1.80
  -6  -4   0    0.80    1.00
  -6  -4   0    2.50    1.60
   6   4   0    1.80    1.20
   6   4   0   -0.70    2.30
  -7  -4   0   27.10    1.70
  -7  -4   0   24.60    4.60
  -7  -4   0   28.80    3.40
  -7  -4   0   29.20    2.80
   7   4   0   23.50    5.50
   7   4   0   24.80    4.60
   7   4   0   26.80    2.90
  -8  -4   0   13.00    2.30
  -8  -4   0   13.80    3.00
  -8  -4   0   18.80    4.30
  -8  -4   0   14.10    1.50
   8   4   0   15.70    5.00
   8   4   0   13.10    2.50
  -9  -4   0    1.60    1.30
  -9  -4   0   -0.80    1.40
  -9  -4   0   -0.60    0.80
  -9  -4   0    3.40    2.80
   9   4   0    0.20    1.20
   9   4   0   -0.30    1.20
 -10  -4   0   -0.50    0.90
 -10  -4   0   -1.40    1.20
 -10  -4   0    8.60    3.70
 -10  -4   0    1.60    1.70
  10   4   0   -0.60    1.30
  10   4   0    1.60    4.80
  10   4   0    2.00    1.60
 -11  -4   0    0.30    0.90
 -11  -4   0    0.60    2.30
 -11  -4   0    1.30    1.80
 -11  -4   0    0.20    1.80
  11   4   0   -2.80    1.40
  11   4   0    2.50    3.80
  11   4   0    1.90    1.70
 -12  -4   0    1.40    2.30
 -12  -4   0    6.50    1.60
 -12  -4   0    3.90    2.20
 -12  -4   0   14.30    4.90
  12   4   0    1.50    3.60
  12   4   0    4.60    4.60
  12   4   0    3.90    2.10
 -13  -4   0    9.70    5.00
 -13  -4   0   30.40    4.40
 -13  -4   0   31.40    2.60
  13   4   0   24.30    4.20
  13   4   0   23.20    7.30
 -14  -4   0    2.50    2.50
 -14  -4   0   -3.60    3.40
 -14  -4   0    5.70    1.50
  14   4   0    2.40    4.10
  15  -5   0    1.10    2.10
  15  -5   0    2.00    1.60
 -15   5   0   -3.40    5.50
 -15   5   0    2.50    2.80
 -15   5   0    6.50    3.20
  14  -5   0   26.30    2.90
  14  -5   0   35.20    6.50
  14  -5   0   35.40    4.40
  14  -5   0   30.40    5.90
 -14   5   0   28.50    7.60
 -14   5   0   37.40    5.50
 -14   5   0   25.60    4.70
  13  -5   0    1.40    1.10
  13  -5   0    2.60    1.80
  13  -5   0    7.40    3.60
  13  -5   0    1.00    2.00
 -13   5   0   -0.40    1.90
 -13   5   0    2.90    0.90
 -13   5   0    0.20    3.80
 -13   5   0    6.50    2.80
  12  -5   0   -2.00    2.10
  12  -5   0   -0.50    1.00
  12  -5   0    1.90    1.30
  12  -5   0    2.40    2.00
 -12   5   0    2.70    2.00
 -12   5   0    2.10    0.90
 -12   5   0    0.10    1.40
 -12   5   0    3.00    5.00
  11  -5   0   15.00    3.40
  11  -5   0   19.50    2.20
  11  -5   0   19.00    4.20
  11  -5   0   17.30    3.20
 -11   5   0   20.80    1.80
 -11   5   0   16.40    5.70
 -11   5   0   14.20    3.60
 -11   5   0   15.20    3.30
  10  -5   0   20.40    2.10
  10  -5   0   21.20    3.40
  10  -5   0   19.10    4.00
  10  -5   0   20.80    2.90
 -10   5   0   13.00    4.80
 -10   5   0   24.50    3.80
 -10   5   0   19.00    3.40
   9  -5   0    3.70    2.20
   9  -5   0    4.50    1.70
   9  -5   0    1.90    1.30
   9  -5   0    3.30    1.10
  -9   5   0    3.70    3.10
  -9   5   0    2.30    1.60
  -9   5   0    5.90    2.10
   8  -5   0    7.70    1.30
   8  -5   0    7.50    1.70
   8  -5   0    6.10    1.80
   8  -5   0    5.90    2.30
  -8   5   0    8.40    2.10
  -8   5   0    5.80    3.20
  -8   5   0    9.30    2.20
   7  -5   0   21.20    2.60
   7  -5   0   18.00    2.20
   7  -5   0   22.50    3.40
   7  -5   0   18.80    1.60
  -7   5   0   20.30    2.70
  -7   5   0   17.20    3.60
  -7   5   0   21.80    2.70
   6  -5   0   78.69    5.00
   6  -5   0   81.69    4.10
   6  -5   0   78.99    4.10
   6  -5   0   80.99    3.50
  -6   5   0   83.49    6.00
  -6   5   0   85.89    4.70
  -6   5   0   81.09    4.10
   5  -5   0   22.20    1.50
   5  -5   0   19.10    2.70
   5  -5   0   19.70    2.10
   5  -5   0   22.20    2.30
  -5   5   0   24.50    2.20
  -5   5   0   22.10    3.40
  -5   5   0   23.90    2.60
   4  -5   0  372.46    8.50
   4  -5   0  362.46   10.60
   4  -5   0  381.66   10.10
  -4   5   0  368.86    9.30
  -4   5   0  376.16   11.30
  -4   5   0  376.76   10.60
  -4   5   0  378.26    8.40
   3  -5   0    0.30    0.60
   3  -5   0    0.00    0.90
   3  -5   0    0.50    1.00
  -3   5   0    0.00    0.70
  -3   5   0    1.20    1.00
  -3   5   0    0.30    0.60
  -3   5   0    0.30    1.00
   2  -5   0   54.09    2.70
   2  -5   0   56.19    3.40
  -2   5   0   52.69    3.40
  -2   5   0   58.99    3.50
  -2   5   0   56.09    2.40
  -2   5   0   52.69    1.70
   1  -5   0  254.87    6.70
   1  -5   0  264.57    7.90
   1  -5   0  253.67    7.70
  -1   5   0  253.37    6.70
  -1   5   0  260.97    7.80
  -1   5   0  249.68    8.00
   0  -5   0  184.68    6.10
   0  -5   0  190.68    7.90
   0   5   0  187.58    5.70
   0   5   0  178.58    6.70
   0   5   0  192.98    6.40
  -1  -5   0   63.09    3.40
  -1  -5   0   62.29    2.20
  -1  -5   0   65.29    4.00
   1   5   0   70.29    4.40
   1   5   0   68.29    3.60
   1   5   0   64.59    3.30
   1   5   0   65.29    3.30
  -2  -5   0   20.30    2.90
  -2  -5   0   14.60    1.90
  -2  -5   0   16.80    1.30
   2   5   0   11.50    1.70
   2   5   0   15.40    2.80
   2   5   0   14.30    2.10
  -3  -5   0  435.46   13.30
  -3  -5   0  444.76   10.90
   3   5   0  433.46   11.90
   3   5   0  426.06   11.50
   3   5   0  415.96   14.50
  -4  -5   0    0.90    1.50
  -4  -5   0    1.10    0.90
  -4  -5   0    0.30    0.90
   4   5   0    2.30    2.10
   4   5   0    1.10    1.10
   4   5   0    2.70    1.40
  -5  -5   0   65.19    3.70
  -5  -5   0   62.99    4.30
  -5  -5   0   55.79    5.20
   5   5   0   70.39    6.90
   5   5   0   68.29    4.70
  -6  -5   0    4.50    2.20
  -6  -5   0    3.70    1.70
  -6  -5   0    3.70    1.30
   6   5   0    3.70    1.60
   6   5   0    6.00    2.20
   6   5   0    1.30    2.70
  -7  -5   0   28.90    4.80
  -7  -5   0   24.20    3.60
  -7  -5   0   25.80    1.50
  -7  -5   0   23.00    2.70
   7   5   0   21.70    3.30
   7   5   0   22.30    5.30
   7   5   0   24.90    3.00
  -8  -5   0  139.79    9.90
  -8  -5   0  134.19    4.00
  -8  -5   0  130.09    7.30
  -8  -5   0  133.99    6.10
   8   5   0  128.09   11.50
   8   5   0  130.69    6.80
  -9  -5   0   26.50    3.20
  -9  -5   0   19.10    3.70
  -9  -5   0   22.00    2.20
  -9  -5   0   24.60    5.40
   9   5   0   21.90    6.40
   9   5   0   22.70    3.60
 -10  -5   0    1.40    1.80
 -10  -5   0    0.10    1.40
 -10  -5   0   -0.40    0.70
 -10  -5   0    0.60    2.50
  10   5   0    0.10    1.70
  10   5   0   -1.50    1.40
  10   5   0    2.70    3.70
 -11  -5   0    7.70    2.50
 -11  -5   0    7.60    3.00
 -11  -5   0    0.90    2.80
 -11  -5   0    5.80    1.30
  11   5   0   10.50    2.90
  11   5   0    8.10    5.40
  11   5   0    3.00    2.30
 -12  -5   0   27.50    2.20
 -12  -5   0   17.90    5.50
 -12  -5   0   26.50    4.40
 -12  -5   0   31.00    4.30
  12   5   0   20.30    3.70
  12   5   0   12.50    5.80
 -13  -5   0   32.80    2.40
 -13  -5   0   34.80    7.40
  13   5   0   23.90    4.30
  13   5   0   24.80    7.50
  15  -6   0   57.49    6.50
  15  -6   0   50.09    3.30
  15  -6   0   49.00    5.10
 -15   6   0   41.20    8.90
 -15   6   0   53.99    7.10
 -15   6   0   45.00    6.10
  14  -6   0   36.90    2.90
  14  -6   0   45.00    6.00
  14  -6   0   33.10    4.10
  14  -6   0   42.30    7.30
 -14   6   0   32.40    5.00
 -14   6   0   39.30    2.40
 -14   6   0   34.60    8.60
 -14   6   0   43.90    6.80
  13  -6   0    2.20    2.20
  13  -6   0    7.30    1.50
  13  -6   0   11.50    3.90
  13  -6   0    6.90    2.20
 -13   6   0    5.90    2.60
 -13   6   0    5.80    2.90
 -13   6   0    7.50    1.40
 -13   6   0    8.60    5.00
  12  -6   0    0.40    1.90
  12  -6   0    2.80    1.80
  12  -6   0    3.40    1.20
  12  -6   0    1.10    2.40
 -12   6   0    4.00    1.10
 -12   6   0    0.70    1.70
 -12   6   0    0.50    1.90
  11  -6   0   57.19    4.50
  11  -6   0   52.69    6.00
  11  -6   0   51.99    3.00
  11  -6   0   46.70    4.70
 -11   6   0   57.79    4.90
 -11   6   0   57.79    9.00
 -11   6   0   50.19    5.10
  10  -6   0    2.90    2.10
  10  -6   0    1.30    1.30
  10  -6   0    0.30    1.50
  10  -6   0    0.80    0.90
 -10   6   0    2.20    3.00
 -10   6   0    1.30    1.50
   9  -6   0    0.00    1.30
   9  -6   0   -0.50    1.10
   9  -6   0    0.90    1.40
   9  -6   0    1.50    0.90
  -9   6   0    2.40    1.50
  -9   6   0   -0.20    1.40
  -9   6   0    3.00    2.90
   8  -6   0   59.29    2.80
   8  -6   0   60.69    4.00
   8  -6   0   60.49    5.10
   8  -6   0   53.89    4.00
  -8   6   0   60.49    4.70
  -8   6   0   58.59    4.10
  -8   6   0   58.59    6.40
   7  -6   0   67.09    4.10
   7  -6   0   67.69    2.80
   7  -6   0   63.69    4.00
   7  -6   0   63.39    4.90
  -7   6   0   68.19    4.00
  -7   6   0   68.99    4.60
  -7   6   0   61.09    5.80
   6  -6   0  391.76   12.50
   6  -6   0  402.56   11.30
   6  -6   0  385.96   10.60
  -6   6   0  401.06   10.70
  -6   6   0  394.46   13.70
  -6   6   0  406.16   12.10
   5  -6   0    6.40    1.20
   5  -6   0    6.90    1.70
   5  -6   0    7.60    2.00
  -5   6   0    7.60    1.50
  -5   6   0    7.80    1.20
  -5   6   0    5.30    1.90
  -5   6   0   10.20    2.20
   4  -6   0  779.72   17.90
   4  -6   0  771.52   15.50
   4  -6   0  741.03   18.50
  -4   6   0  769.22   16.90
  -4   6   0  783.92   18.60
  -4   6   0  764.22   15.80
   3  -6   0  338.87    9.80
   3  -6   0  339.87   10.20
  -3   6   0  337.77   10.20
  -3   6   0  342.97   10.30
  -3   6   0  330.97    7.80
  -3   6   0  315.07    8.80
   2  -6   0  360.26   10.40
   2  -6   0  360.96   10.70
   2  -6   0  371.96    9.20
  -2   6   0  380.56    8.70
  -2   6   0  371.16   10.90
  -2   6   0  360.66   10.50
   1  -6   0   16.60    2.80
   1  -6   0   15.40    1.70
   1  -6   0   18.60    2.70
   1  -6   0   15.60    1.00
  -1   6   0   18.60    1.90
  -1   6   0   17.60    2.70
  -1   6   0   16.80    2.40
   0  -6   0  445.76   11.70
   0  -6   0  448.96   12.30
   0   6   0  441.06   11.90
   0   6   0  443.06   10.90
   0   6   0  443.66   12.70
  -1  -6   0   88.99    2.90
  -1  -6   0   81.99    4.20
  -1  -6   0   83.49    4.80
   1   6   0   87.69    4.10
   1   6   0   87.69    4.20
   1   6   0   89.99    5.30
   1   6   0   85.59    4.50
  -2  -6   0  156.68    5.80
  -2  -6   0  157.08    7.00
  -2  -6   0  147.59    4.40
   2   6   0  155.48    7.80
   2   6   0  153.18    6.20
   2   6   0  153.38    6.00
  -3  -6   0  356.56    9.90
  -3  -6   0  340.57    8.40
  -3  -6   0  365.66   12.20
   3   6   0  357.06   13.50
   3   6   0  354.56   10.60
   3   6   0  363.16   10.80
  -4  -6   0   36.20    2.90
  -4  -6   0   35.00    4.10
   4   6   0   33.30    5.20
   4   6   0   39.60    3.40
   4   6   0   41.00    3.60
  -5  -6   0   25.80    2.70
  -5  -6   0   32.10    4.60
   5   6   0   18.70    4.60
   5   6   0   28.50    3.40
   5   6   0   24.40    2.90
  -6  -6   0   18.60    3.90
  -6  -6   0   21.90    2.60
   6   6   0   13.30    3.00
   6   6   0   23.20    3.40
   6   6   0   18.50    5.00
  -7  -6   0    1.20    1.30
  -7  -6   0   -0.90    1.10
  -7  -6   0   -0.90    1.60
   7   6   0   -4.70    2.00
   7   6   0   -0.40    1.40
   7   6   0    0.80    1.60
  -8  -6   0   84.19    7.60
  -8  -6   0   61.79    4.40
  -8  -6   0   62.09    5.30
   8   6   0   61.59    9.20
  -9  -6   0    7.10    3.30
   9   6   0   10.40    5.10
 -10  -6   0   42.50    7.70
 -10  -6   0   39.20    6.50
  10   6   0   29.10    4.30
  10   6   0   39.90    8.60
 -11  -6   0    3.80    3.50
 -11  -6   0    2.50    2.10
  11   6   0   -3.40    3.80
 -12  -6   0    3.20    3.30
 -12  -6   0    4.40    2.50
  12   6   0    3.80    5.20
 -13  -6   0   -0.30    2.40
 -13  -6   0    3.00    3.60
  15  -7   0   10.10    5.90
  15  -7   0    2.00    1.90
  15  -7   0    2.50    2.90
 -15   7   0    0.10    5.20
 -15   7   0    1.40    1.10
 -15   7   0   -3.20    5.10
  14  -7   0    6.00    2.90
  14  -7   0    3.90    1.30
  14  -7   0    2.30    2.00
  14  -7   0   -0.10    3.20
 -14   7   0   -0.80    1.90
 -14   7   0    7.40    5.70
 -14   7   0    1.90    2.90
 -14   7   0    4.30    1.20
  13  -7   0   38.80    4.10
  13  -7   0   35.70    2.60
  13  -7   0   28.60    4.80
  13  -7   0   32.60    5.80
 -13   7   0   34.80    5.30
 -13   7   0   33.20    2.50
 -13   7   0   31.20    5.00
  12  -7   0   68.19    5.70
  12  -7   0   69.69    5.10
  12  -7   0   66.99    3.20
  12  -7   0   75.29    7.10
 -12   7   0   64.39    6.10
 -12   7   0   63.99   13.40
 -12   7   0   69.29    5.60
  11  -7   0   14.00    3.00
  11  -7   0   18.50    3.00
  11  -7   0   17.80    1.80
  11  -7   0   17.20    4.10
 -11   7   0   15.30    3.70
 -11   7   0   11.40    2.80
 -11   7   0   13.10    5.30
  10  -7   0   25.10    4.40
  10  -7   0   31.30    3.70
  10  -7   0   31.90    2.30
  10  -7   0   36.50    3.50
 -10   7   0   29.80    4.30
 -10   7   0   23.40    5.70
 -10   7   0   34.10    3.60
   9  -7   0   20.40    2.90
   9  -7   0   17.30    2.80
   9  -7   0   17.90    1.80
   9  -7   0   14.50    3.40
  -9   7   0   23.10    5.10
  -9   7   0   25.50    3.10
  -9   7   0   22.00    3.70
   8  -7   0    6.90    1.90
   8  -7   0    4.80    2.20
   8  -7   0    8.60    2.00
  -8   7   0    6.10    3.10
  -8   7   0   10.10    2.20
  -8   7   0    5.70    2.20
   7  -7   0    7.80    1.50
   7  -7   0    5.50    1.70
   7  -7   0    9.20    2.40
  -7   7   0   11.40    3.20
  -7   7   0    7.40    2.10
  -7   7   0    6.20    1.70
   6  -7   0   -0.10    0.70
   6  -7   0    1.40    1.20
   6  -7   0    0.80    1.30
  -6   7   0    0.70    1.30
  -6   7   0   -0.90    1.20
  -6   7   0    4.10    1.40
   5  -7   0    2.10    1.30
   5  -7   0    1.20    1.40
  -5   7   0    2.30    1.60
  -5   7   0    2.60    0.90
  -5   7   0    1.80    1.00
  -5   7   0    2.40    1.50
   4  -7   0    7.20    1.90
   4  -7   0    8.80    1.90
  -4   7   0    4.30    1.70
  -4   7   0    7.90    1.30
  -4   7   0    5.90    1.80
  -4   7   0    7.20    1.50
   3  -7   0   -1.00    0.70
   3  -7   0    1.00    1.10
   3  -7   0    0.50    1.00
  -3   7   0   -0.40    1.00
  -3   7   0   -0.80    1.00
  -3   7   0    0.50    0.70
  -3   7   0    0.40    0.70
   2  -7   0  221.78    8.10
   2  -7   0  224.48    6.70
   2  -7   0  216.58    8.00
  -2   7   0  229.98    8.50
  -2   7   0  234.68    6.50
   1  -7   0  188.88    7.10
   1  -7   0  196.68    4.50
   1  -7   0  188.88    7.50
  -1   7   0  195.78    7.90
  -1   7   0  192.28    6.30
   0  -7   0  153.58    6.10
   0  -7   0  159.38    4.20
   0  -7   0  147.79    6.70
   0   7   0  143.09    7.00
   0   7   0  142.49    6.60
   0   7   0  152.58    5.80
  -1  -7   0  245.58    5.90
  -1  -7   0  245.88    8.10
  -1  -7   0  240.38    9.00
   1   7   0  243.98    7.90
   1   7   0  229.18    9.50
   1   7   0  233.98    8.50
   1   7   0  243.18    7.80
  -2  -7   0  472.75   14.40
  -2  -7   0  486.45   10.70
   2   7   0  492.25   15.90
   2   7   0  481.15   13.50
   2   7   0  488.15   13.10
   2   7   0  491.85   13.10
  -3  -7   0  103.89    6.30
  -3  -7   0  106.99    3.90
  -3  -7   0  102.59    4.90
   3   7   0  105.79    5.50
   3   7   0   97.79    7.10
   3   7   0  105.99    5.50
  -4  -7   0   21.00    2.00
  -4  -7   0   31.70    4.00
  -4  -7   0   27.60    2.70
   4   7   0   23.50    3.30
   4   7   0   26.90    4.70
   4   7   0   23.50    2.90
  -5  -7   0    8.50    2.80
  -5  -7   0   12.60    2.20
   5   7   0   13.00    2.50
   5   7   0   14.80    4.40
  -6  -7   0    0.10    1.60
  -6  -7   0   -1.00    0.90
   6   7   0    0.30    1.60
   6   7   0   -1.10    1.20
   6   7   0    2.90    2.90
  -7  -7   0   21.30    3.00
  -7  -7   0   16.80    4.10
   7   7   0   22.70    3.50
   7   7   0   25.10    6.40
  -8  -7   0   85.69    5.20
  -8  -7   0   78.59    7.50
   8   7   0   73.49   13.00
   8   7   0   85.29    6.10
  -9  -7   0    7.00    2.10
  -9  -7   0    6.10    3.30
   9   7   0    5.90    4.30
   9   7   0    4.80    2.40
   9   7   0    9.20    3.10
 -10  -7   0    1.90    3.10
 -10  -7   0   13.00    2.90
  10   7   0    5.80    3.00
  10   7   0    8.30    5.20
  10   7   0   11.10    2.90
 -11  -7   0    6.10    3.70
  11   7   0    2.70    2.10
  11   7   0    5.40    7.10
 -12  -7   0   44.10    4.70
 -12  -7   0   38.20    7.20
 -12  -7   0   49.40    5.50
  12   7   0   44.40    9.70
  12   7   0   39.70    5.70
  15  -8   0    0.90    3.40
  15  -8   0    8.60    3.20
  15  -8   0    5.60    2.40
 -15   8   0   -3.90    6.80
 -15   8   0    2.30    1.30
 -15   8   0    6.60    3.00
  14  -8   0    2.90    2.40
  14  -8   0    4.00    3.00
  14  -8   0    2.40    1.90
 -14   8   0   -5.20    4.70
 -14   8   0   -0.20    2.70
 -14   8   0    0.00    1.20
 -14   8   0   -2.60    1.70
  13  -8   0   -0.80    2.70
  13  -8   0   -0.10    2.00
  13  -8   0   -1.30    1.50
 -13   8   0   -2.60    1.60
 -13   8   0    8.80    4.70
 -13   8   0    0.00    2.20
  12  -8   0    8.20    3.70
  12  -8   0   11.50    2.80
  12  -8   0    8.70    2.40
 -12   8   0    5.40    2.90
 -12   8   0   16.90    5.40
 -12   8   0    8.60    2.60
  11  -8   0    0.20    1.60
  11  -8   0    0.60    1.50
 -11   8   0   -1.00    2.80
 -11   8   0    0.50    2.00
 -11   8   0   -0.90    1.30
  10  -8   0    5.90    2.20
  10  -8   0    5.50    2.70
 -10   8   0    2.60    2.90
 -10   8   0    2.80    1.90
   9  -8   0   31.30    4.70
   9  -8   0   40.40    3.70
   9  -8   0   37.40    2.90
  -9   8   0   38.30    3.60
  -9   8   0   34.90    5.90
   8  -8   0    0.60    0.90
   8  -8   0    1.80    1.50
   8  -8   0    0.90    1.90
  -8   8   0   -1.90    1.80
  -8   8   0    1.60    1.70
  -8   8   0    0.80    1.30
   7  -8   0   18.90    3.50
   7  -8   0   12.80    1.80
   7  -8   0   16.10    2.70
  -7   8   0   13.40    2.20
  -7   8   0   20.10    3.40
  -7   8   0   11.10    3.20
   6  -8   0    1.40    0.90
   6  -8   0    1.50    1.60
   6  -8   0    0.80    1.10
  -6   8   0    1.60    1.80
  -6   8   0   -0.20    0.70
  -6   8   0    0.50    1.30
  -6   8   0    0.90    1.10
   5  -8   0  153.88    6.70
   5  -8   0  151.28    7.30
  -5   8   0  153.18    7.30
  -5   8   0  143.49    5.70
  -5   8   0  157.18    5.20
  -5   8   0  173.98    8.00
   4  -8   0  154.98    5.90
   4  -8   0  153.98    6.80
   4  -8   0  148.39    7.00
  -4   8   0  148.69    7.10
  -4   8   0  156.78    7.30
  -4   8   0  152.78    5.20
  -4   8   0  147.99    5.60
  -4   8   0  149.49    4.10
   3  -8   0    1.30    1.20
   3  -8   0    1.00    1.20
   3  -8   0   -0.50    0.70
  -3   8   0   -0.20    0.70
  -3   8   0   -0.10    1.20
  -3   8   0    1.10    0.80
  -3   8   0    1.00    1.30
   2  -8   0    0.40    1.10
   2  -8   0   -0.50    1.10
   2  -8   0    1.10    0.90
  -2   8   0    1.50    0.90
  -2   8   0    0.40    1.30
  -2   8   0    0.40    1.10
   1  -8   0    8.20    2.00
   1  -8   0   11.60    2.30
  -1   8   0    8.40    2.00
  -1   8   0    9.20    1.70
  -1   8   0    8.90    2.30
   0  -8   0  229.48    8.30
   0  -8   0  235.88    9.20
   0  -8   0  238.38    6.00
   0   8   0  241.08    7.70
   0   8   0  242.68    7.80
   0   8   0  220.08    8.60
   0   8   0  231.28    9.70
  -1  -8   0   12.60    1.30
  -1  -8   0   10.60    2.10
  -1  -8   0   11.10    2.50
   1   8   0   12.70    2.80
   1   8   0    9.70    2.20
   1   8   0   13.70    2.30
   1   8   0   14.00    2.20
  -2  -8   0   49.70    2.50
  -2  -8   0   44.30    4.30
   2   8   0   50.79    3.80
   2   8   0   55.19    4.30
   2   8   0   47.30    3.60
   2   8   0   53.29    5.20
  -3  -8   0    5.10    1.20
  -3  -8   0    4.30    1.60
  -3  -8   0    4.10    2.00
   3   8   0    6.20    2.80
   3   8   0    6.00    2.00
   3   8   0    3.30    1.50
  -4  -8   0   17.50    1.90
  -4  -8   0   24.70    2.80
  -4  -8   0   19.80    3.40
   4   8   0   13.20    3.80
   4   8   0   17.70    3.10
   4   8   0   12.20    2.30
  -5  -8   0  112.49    5.70
  -5  -8   0  111.69    4.80
  -5  -8   0  110.69    7.60
   5   8   0  113.09    9.60
   5   8   0  107.89    6.40
   5   8   0  109.69    6.70
  -6  -8   0   37.00    3.00
  -6  -8   0   34.00    5.40
  -6  -8   0   33.90    3.50
   6   8   0   38.00    4.10
   6   8   0   23.70    6.40
  -7  -8   0   48.20    4.10
  -7  -8   0   43.60    6.80
  -7  -8   0   46.10    3.50
   7   8   0   49.20    4.90
   7   8   0   39.10    7.80
  -8  -8   0    1.30    1.70
  -8  -8   0    1.70    1.40
  -8  -8   0   -0.40    2.00
   8   8   0    4.00    2.20
   8   8   0    8.90    5.00
   8   8   0    0.40    1.70
  -9  -8   0   -0.40    1.10
  -9  -8   0   -0.10    2.30
   9   8   0    1.70    3.80
   9   8   0   -1.10    1.40
   9   8   0    0.40    1.90
 -10  -8   0    0.30    1.40
 -10  -8   0    0.60    1.70
 -10  -8   0   -2.80    2.70
  10   8   0    2.10    2.20
  10   8   0    3.90    5.50
 -11  -8   0    4.10    2.30
 -11  -8   0    3.80    3.80
 -11  -8   0    6.30    2.30
  11   8   0   27.00    7.30
  11   8   0    5.40    2.70
 -12  -8   0    3.30    2.20
 -12  -8   0    0.40    3.70
  12   8   0   -3.00    2.60
  15  -9   0    1.30    1.90
  15  -9   0    0.90    2.80
 -15   9   0   -0.30    2.60
 -15   9   0    3.20    1.30
  14  -9   0   52.99    5.80
  14  -9   0   40.60    8.10
  14  -9   0   60.19    8.00
 -14   9   0   52.69    5.30
 -14   9   0   43.70   10.60
 -14   9   0   54.49    7.10
 -14   9   0   43.60    3.20
  13  -9   0   15.90    3.20
  13  -9   0   14.90    2.80
  13  -9   0   13.80    4.00
 -13   9   0   22.60    7.30
 -13   9   0   21.20    4.40
 -13   9   0   14.60    3.10
  12  -9   0    3.30    1.90
  12  -9   0    9.10    3.70
  12  -9   0    5.20    1.90
 -12   9   0    2.40    2.40
 -12   9   0    3.70    2.10
 -12   9   0    3.50    4.10
  11  -9   0   14.50    3.90
  11  -9   0   15.30    2.40
  11  -9   0   15.10    3.00
 -11   9   0   26.40    4.60
 -11   9   0   12.60    2.70
 -11   9   0   17.20    5.50
  10  -9   0   72.09    6.60
  10  -9   0   76.29    4.10
  10  -9   0   77.29    5.20
 -10   9   0   72.19    8.30
 -10   9   0   75.99    5.20
 -10   9   0   73.19    6.40
   9  -9   0   60.19    3.50
   9  -9   0   63.19    6.00
   9  -9   0   57.99    4.60
  -9   9   0   55.29    7.90
  -9   9   0   59.89    4.40
  -9   9   0   62.49    5.80
   8  -9   0  177.68    6.00
   8  -9   0  184.58    7.90
   8  -9   0  174.68    9.20
  -8   9   0  170.68    7.10
  -8   9   0  171.88   10.30
  -8   9   0  188.58    9.50
   7  -9   0   14.40    1.70
   7  -9   0   17.50    3.30
   7  -9   0   16.90    2.90
  -7   9   0   13.70    3.50
  -7   9   0   11.30    2.90
  -7   9   0   14.40    2.50
   6  -9   0   -1.60    1.20
   6  -9   0   -1.30    0.90
  -6   9   0    1.00    1.50
  -6   9   0   -0.10    1.40
  -6   9   0    0.60    0.90
  -6   9   0    0.90    1.20
   5  -9   0  286.27   10.30
   5  -9   0  318.97    9.60
   5  -9   0  295.47   11.00
  -5   9   0  298.87    8.40
  -5   9   0  284.17   11.00
  -5   9   0  296.97   11.40
  -5   9   0  292.37    9.00
   4  -9   0   55.49    4.40
   4  -9   0   61.99    4.90
   4  -9   0   56.39    3.70
  -4   9   0   66.59    5.00
  -4   9   0   58.09    3.30
  -4   9   0   55.39    3.60
  -4   9   0   54.69    4.70
   3  -9   0  274.87   10.00
   3  -9   0  261.57   10.00
   3  -9   0  268.67    8.20
  -3   9   0  266.17   10.20
  -3   9   0  275.27   10.60
  -3   9   0  273.37    7.80
   2  -9   0  400.56   12.40
   2  -9   0  384.16   10.30
   2  -9   0  387.16   12.50
  -2   9   0  380.76   13.00
  -2   9   0  350.56   12.10
  -2   9   0  391.36   10.20
   1  -9   0   14.70    2.90
   1  -9   0   12.10    2.50
  -1   9   0   17.20    2.90
  -1   9   0   20.70    2.40
  -1   9   0   17.50    3.20
   0  -9   0    3.40    1.70
   0  -9   0    5.60    1.00
   0  -9   0    5.00    1.80
   0   9   0    5.20    1.60
   0   9   0    3.50    1.70
   0   9   0    4.70    2.20
   0   9   0    4.00    1.30
  -1  -9   0    7.80    2.00
  -1  -9   0    5.60    2.00
   1   9   0   11.10    2.50
   1   9   0    8.70    2.60
   1   9   0    8.10    2.00
   1   9   0    9.90    2.20
  -2  -9   0   31.20    3.90
  -2  -9   0   29.50    2.70
   2   9   0   32.50    3.30
   2   9   0   28.00    3.50
   2   9   0   31.90    3.30
   2   9   0   34.20    5.10
  -3  -9   0   34.60    3.30
  -3  -9   0   29.20    2.20
  -3  -9   0   32.20    3.90
   3   9   0   29.40    3.50
   3   9   0   33.70    3.90
   3   9   0   31.50    3.60
   3   9   0   32.30    5.30
  -4  -9   0   74.69    4.90
  -4  -9   0   83.39    3.90
  -4  -9   0   80.39    6.50
   4   9   0   78.29    5.60
   4   9   0   84.79    5.80
   4   9   0   81.99    7.90
  -5  -9   0   64.89    3.80
  -5  -9   0   78.09    5.00
  -5  -9   0   75.89    6.60
   5   9   0   81.89    6.00
   5   9   0   72.59    8.30
   5   9   0   74.19    5.80
  -6  -9   0   39.80    3.20
  -6  -9   0   50.59    6.00
  -6  -9   0   36.00    3.70
   6   9   0   34.70    7.30
   6   9   0   42.10    4.70
  -7  -9   0   92.19    5.00
  -7  -9   0  109.29    6.60
  -7  -9   0   92.19    7.90
   7   9   0  100.39    7.00
   7   9   0   86.19   10.40
   7   9   0   95.19    7.00
  -8  -9   0    2.50    1.90
  -8  -9   0    0.70    1.00
  -8  -9   0   -1.00    2.20
   8   9   0   -5.80    3.20
   8   9   0   -0.60    1.90
   8   9   0    0.90    2.80
  -9  -9   0   15.10    2.80
  -9  -9   0   17.40    3.20
  -9  -9   0   17.20    4.90
   9   9   0   33.10    7.90
   9   9   0   19.20    3.70
   9   9   0   12.70    4.30
 -10  -9   0    5.10    1.80
 -10  -9   0    7.10    3.60
 -10  -9   0    8.20    2.70
  10   9   0    5.00    5.60
  10   9   0    9.70    3.20
 -11  -9   0   -1.30    1.30
 -11  -9   0    3.30    3.00
 -11  -9   0   -4.00    2.80
  11   9   0   -2.30    2.10
  14 -10   0    0.30    3.20
  14 -10   0    4.70    3.50
  14 -10   0    3.40    2.20
 -14  10   0    4.70    2.60
 -14  10   0   16.50    6.50
 -14  10   0    6.90    5.00
  13 -10   0    2.40    2.50
  13 -10   0    0.80    1.50
  13 -10   0    0.90    1.90
 -13  10   0    1.10    2.60
 -13  10   0    7.10    5.20
 -13  10   0    3.50    1.70
  12 -10   0    1.20    1.30
  12 -10   0   -2.20    1.40
  12 -10   0    1.50    2.50
 -12  10   0   -0.40    1.30
 -12  10   0   -1.50    3.70
 -12  10   0   -1.40    2.20
  11 -10   0    1.40    1.60
  11 -10   0   -2.20    1.80
  11 -10   0    0.80    1.10
 -11  10   0   -1.90    3.40
 -11  10   0   -1.80    1.80
 -11  10   0   -1.20    1.40
  10 -10   0   21.20    4.30
  10 -10   0   23.60    2.40
  10 -10   0   22.10    3.50
 -10  10   0   23.60    3.50
 -10  10   0   20.90    4.30
 -10  10   0   24.70    5.90
   9 -10   0   15.90    2.10
   9 -10   0   14.20    3.00
   9 -10   0   20.40    4.20
  -9  10   0   15.10    2.70
  -9  10   0   14.50    4.30
   8 -10   0   12.40    3.20
   8 -10   0    7.90    2.20
   8 -10   0    8.30    1.50
  -8  10   0   14.30    2.50
  -8  10   0   13.30    3.40
  -8  10   0   12.20    3.70
   7 -10   0    0.70    1.40
   7 -10   0   -1.00    1.40
  -7  10   0    1.60    1.10
  -7  10   0    0.50    1.70
  -7  10   0    2.20    1.30
  -7  10   0    0.30    1.70
   6 -10   0  157.38    8.30
   6 -10   0  153.68    6.90
   6 -10   0  146.09    7.30
  -6  10   0  160.78    6.40
  -6  10   0  167.78    8.80
  -6  10   0  148.39    8.50
  -6  10   0  157.08    5.80
   5 -10   0  324.07   12.20
   5 -10   0  342.17   11.80
   5 -10   0  335.77   10.40
  -5  10   0  334.17   12.70
  -5  10   0  324.07   10.00
  -5  10   0  321.77    9.30
  -5  10   0  326.87   12.50
   4 -10   0    1.90    1.60
   4 -10   0    0.60    1.10
   4 -10   0    2.30    1.70
  -4  10   0    3.00    1.70
  -4  10   0    0.60    1.00
  -4  10   0    0.70    1.00
  -4  10   0    0.90    1.60
   3 -10   0  126.99    5.40
   3 -10   0  126.09    6.90
   3 -10   0  119.39    6.70
   3 -10   0  120.59    4.60
  -3  10   0  128.59    7.10
  -3  10   0  128.79    7.50
  -3  10   0  126.79    5.10
   2 -10   0    2.20    1.70
   2 -10   0    2.50    1.80
  -2  10   0    3.30    1.30
  -2  10   0    2.00    2.00
  -2  10   0    1.10    1.60
   1 -10   0   93.69    6.10
   1 -10   0   90.09    5.60
  -1  10   0   95.69    4.80
  -1  10   0   81.89    6.20
  -1  10   0   95.19    6.10
  -1  10   0   89.99    4.60
   0 -10   0  127.09    7.30
   0 -10   0  133.99    6.70
   0 -10   0  132.09    4.30
   0  10   0  121.69    5.90
   0  10   0  135.49    6.10
   0  10   0  117.19    7.80
   0  10   0  132.99    7.30
  -1 -10   0  197.18    8.30
  -1 -10   0  199.48    6.10
  -1 -10   0  193.78    9.30
   1  10   0  195.18    8.00
   1  10   0  237.68    8.50
   1  10   0  204.18   10.60
   1  10   0  199.98    9.00
  -2 -10   0   65.99    5.60
   2  10   0   55.69    4.50
   2  10   0   65.09    4.70
   2  10   0   64.69    5.30
   2  10   0   68.29    6.70
  -3 -10   0   49.00    5.20
  -3 -10   0   48.10    2.90
  -3 -10   0   51.99    4.20
   3  10   0   51.69    4.90
   3  10   0   49.00    4.50
   3  10   0   50.19    7.00
   3  10   0   49.40    4.40
  -4 -10   0   32.70    3.50
  -4 -10   0   28.40    2.50
  -4 -10   0   32.80    5.10
   4  10   0   37.30    4.90
   4  10   0   28.60    4.40
   4  10   0   28.60    5.60
   4  10   0   25.00    3.80
  -5 -10   0   45.30    5.60
  -5 -10   0   44.90    4.20
  -5 -10   0   48.40    3.40
   5  10   0   41.90    6.50
   5  10   0   49.20    5.00
   5  10   0   52.69   13.10
  -6 -10   0    0.00    0.90
  -6 -10   0   -1.90    1.40
  -6 -10   0    1.20    1.50
   6  10   0   -0.50    3.30
   6  10   0    0.60    1.60
   6  10   0    0.10    1.70
  -7 -10   0   29.80    5.40
  -7 -10   0   21.70    3.40
   7  10   0   27.50    6.80
   7  10   0   19.30    4.00
  -8 -10   0    6.60    2.00
  -8 -10   0    6.20    2.20
  -8 -10   0    6.50    3.10
   8  10   0    9.90    5.40
   8  10   0   10.30    3.20
   8  10   0    4.30    2.50
  -9 -10   0   34.00    4.20
  -9 -10   0   22.40    3.40
  -9 -10   0   23.80    5.40
   9  10   0   20.30    7.10
   9  10   0   22.80    4.60
 -10 -10   0   13.40    3.30
 -10 -10   0    8.80    2.50
 -10 -10   0   10.50    3.90
  10  10   0   18.10    8.70
  10  10   0   11.70    3.40
  14 -11   0   15.10    2.80
  14 -11   0    9.90    2.80
  14 -11   0   23.20    6.70
 -14  11   0   19.40    7.70
 -14  11   0   16.70    3.50
  13 -11   0   37.00    3.30
  13 -11   0   36.50    6.40
 -13  11   0   29.10    8.00
 -13  11   0   26.20    4.10
 -13  11   0   43.00    6.60
  12 -11   0   48.50    4.70
  12 -11   0   54.99    6.70
  12 -11   0   46.40    3.40
 -12  11   0   46.90    7.10
 -12  11   0   46.60    8.60
 -12  11   0   42.30    4.30
  11 -11   0   92.99    4.40
  11 -11   0   87.69    6.10
  11 -11   0   84.79   10.40
 -11  11   0   95.99    9.80
 -11  11   0   87.59    5.70
  10 -11   0   14.90    1.90
  10 -11   0   13.30    3.80
  10 -11   0   15.60    3.00
 -10  11   0   15.30    2.90
 -10  11   0   10.40    3.60
 -10  11   0   13.70    4.50
   9 -11   0   22.30    3.60
   9 -11   0   13.70    3.50
  -9  11   0   23.20    3.40
  -9  11   0   25.50    4.80
  -9  11   0   26.30    5.40
   8 -11   0   73.19    5.50
   8 -11   0   68.89    6.30
  -8  11   0   81.19    7.20
  -8  11   0   76.19    4.90
   7 -11   0    4.10    2.00
   7 -11   0    3.80    1.90
   7 -11   0    2.80    2.20
  -7  11   0    4.20    1.70
  -7  11   0    3.40    1.40
  -7  11   0    6.40    2.80
  -7  11   0    4.20    2.50
   6 -11   0   30.90    3.30
   6 -11   0   40.50    4.80
   6 -11   0   36.90    4.00
  -6  11   0   42.50    5.00
  -6  11   0   34.20    5.00
  -6  11   0   39.80    3.10
  -6  11   0   37.80    3.40
   5 -11   0    2.20    1.70
   5 -11   0    1.00    1.90
   5 -11   0    1.40    1.40
  -5  11   0    1.90    1.40
  -5  11   0    4.20    2.50
  -5  11   0    2.40    1.90
  -5  11   0    1.90    1.30
   4 -11   0   34.90    4.00
   4 -11   0   35.20    4.20
   4 -11   0   35.00    3.10
  -4  11   0   36.40    5.00
  -4  11   0   31.40    2.70
  -4  11   0   35.50    3.10
  -4  11   0   37.20    4.40
   3 -11   0    3.60    1.40
   3 -11   0    2.50    1.80
   3 -11   0    5.70    1.50
   3 -11   0    4.30    2.00
  -3  11   0    4.10    2.30
  -3  11   0    4.40    1.40
  -3  11   0    5.60    2.30
   2 -11   0  145.59    7.90
   2 -11   0  138.59    7.50
  -2  11   0  146.29    8.50
  -2  11   0  135.49    7.70
  -2  11   0  149.88    6.10
   1 -11   0  160.08    8.40
   1 -11   0  162.68    7.80
  -1  11   0  148.29    6.60
  -1  11   0  151.98    6.50
  -1  11   0  149.39    8.20
  -1  11   0  161.58    9.20
   0 -11   0   36.80    2.20
   0 -11   0   35.00    4.00
   0 -11   0   33.10    4.20
   0  11   0   37.40    4.40
   0  11   0   30.60    5.00
   0  11   0   33.90    3.40
   0  11   0   37.80    3.60
  -1 -11   0   -0.10    1.50
  -1 -11   0    1.00    0.90
  -1 -11   0    1.60    1.70
   1  11   0    2.10    1.80
   1  11   0    3.40    2.80
   1  11   0    2.70    1.60
   1  11   0    2.10    1.70
  -2 -11   0    0.60    1.70
  -2 -11   0   -2.60    1.10
  -2 -11   0   -1.00    0.80
   2  11   0   -0.10    1.50
   2  11   0    2.50    1.50
   2  11   0   -1.30    1.20
   2  11   0    1.30    2.30
  -3 -11   0  121.69    4.80
  -3 -11   0  128.39    6.90
   3  11   0  148.19   10.60
   3  11   0  129.09    7.40
   3  11   0  127.79    7.30
   3  11   0  128.79    7.80
  -4 -11   0   84.49    7.10
  -4 -11   0   74.29    3.90
  -4 -11   0   77.49    5.60
   4  11   0   78.89    5.90
   4  11   0   71.99    8.40
   4  11   0   81.99    6.40
  -5 -11   0   -0.50    1.00
  -5 -11   0    0.80    2.00
  -5 -11   0    1.80    1.70
   5  11   0   -1.10    1.30
   5  11   0    0.30    1.70
   5  11   0   -1.70    1.60
   5  11   0    0.30    3.10
  -6 -11   0   -0.10    1.50
  -6 -11   0    2.40    2.50
  -6 -11   0    2.70    1.30
   6  11   0   -0.30    3.50
   6  11   0    0.40    1.60
   6  11   0   -0.70    1.40
   6  11   0   -0.60    1.70
  -7 -11   0   26.50    5.40
  -7 -11   0   24.30    3.90
  -7 -11   0   28.50    3.20
   7  11   0   20.40    4.60
   7  11   0   22.70    4.40
   7  11   0   27.00    7.10
   7  11   0   21.90    4.60
  -8 -11   0    2.90    1.70
  -8 -11   0    4.10    3.10
  -8 -11   0    4.70    2.40
   8  11   0   -3.50    5.10
  -9 -11   0   29.00    3.80
  -9 -11   0   28.90    4.20
  -9 -11   0   26.00    5.80
   9  11   0   32.90    8.70
   9  11   0   24.20    5.10
 -10 -11   0    7.40    3.50
 -10 -11   0    7.00    6.10
  10  11   0   -3.00    2.80
  13 -12   0   13.20    4.90
  13 -12   0    3.30    2.30
 -13  12   0   -0.50    1.80
 -13  12   0    0.90    4.90
  12 -12   0   17.10    3.60
  12 -12   0   18.80    4.40
 -12  12   0   17.70    4.90
 -12  12   0   18.30    5.70
 -12  12   0   19.40    3.30
  11 -12   0   12.00    4.20
  11 -12   0   15.30    3.20
 -11  12   0    6.00    3.50
 -11  12   0    8.70    4.70
  10 -12   0   11.20    3.70
  10 -12   0    7.20    2.60
 -10  12   0   10.60    3.80
 -10  12   0    7.60    2.40
   9 -12   0   71.89    5.80
  -9  12   0   72.89    4.90
  -9  12   0   81.19    8.20
  -9  12   0   81.69    7.20
   8 -12   0   32.70    3.90
   8 -12   0   32.80    4.00
   8 -12   0   30.80    5.10
  -8  12   0   27.90    2.80
  -8  12   0   33.20    3.50
  -8  12   0   30.30    5.30
  -8  12   0   28.00    2.20
  -8  12   0   25.60    4.90
   7 -12   0    4.50    2.30
   7 -12   0    4.30    1.90
   7 -12   0    3.70    1.90
  -7  12   0    2.70    2.30
  -7  12   0    0.00    2.00
  -7  12   0    1.90    1.30
  -7  12   0    1.80    1.50
   6 -12   0   16.60    3.20
   6 -12   0   15.10    2.70
   6 -12   0   10.70    3.10
  -6  12   0    8.30    3.00
  -6  12   0   13.40    2.70
  -6  12   0    7.50    3.00
  -6  12   0   13.20    2.20
   5 -12   0    2.10    2.00
   5 -12   0    3.90    1.70
   5 -12   0    2.20    2.10
  -5  12   0    2.80    1.60
  -5  12   0    4.30    1.60
  -5  12   0    3.40    2.10
  -5  12   0    1.80    2.30
   4 -12   0    0.90    1.20
   4 -12   0    1.80    1.90
   4 -12   0    1.60    1.60
  -4  12   0    0.40    1.20
  -4  12   0    1.00    1.20
  -4  12   0   -2.70    1.50
  -4  12   0    1.00    1.80
   3 -12   0   12.60    3.00
   3 -12   0   15.10    3.20
   3 -12   0   13.20    2.10
  -3  12   0   13.70    3.30
  -3  12   0   21.40    4.20
  -3  12   0   13.20    2.20
   2 -12   0    7.60    2.50
   2 -12   0    4.10    2.10
  -2  12   0    3.10    2.30
  -2  12   0    3.80    2.20
  -2  12   0    6.80    1.90
   1 -12   0   59.29    5.10
   1 -12   0   59.99    5.50
  -1  12   0   62.69    4.50
  -1  12   0   59.59    4.20
  -1  12   0   52.39    5.80
  -1  12   0   49.90    5.10
   0 -12   0   11.40    1.40
   0 -12   0    6.50    2.40
   0 -12   0   11.80    3.20
   0  12   0    8.60    3.30
   0  12   0    6.70    2.60
   0  12   0    8.70    2.20
  -1 -12   0    9.20    3.10
  -1 -12   0    6.50    1.40
  -1 -12   0    3.70    2.10
   1  12   0    6.40    2.10
   1  12   0    3.70    2.10
   1  12   0    3.60    1.80
   1  12   0    8.30    3.10
  -2 -12   0    1.10    2.00
  -2 -12   0    3.10    1.80
  -2 -12   0    1.80    1.20
   2  12   0    0.80    1.70
   2  12   0    1.30    1.70
   2  12   0    1.10    2.80
   2  12   0    1.80    1.80
  -3 -12   0   36.40    2.60
  -3 -12   0   33.80    5.30
  -3 -12   0   36.50    4.10
   3  12   0   36.60    6.60
   3  12   0   35.40    5.10
   3  12   0   26.90    4.00
  -4 -12   0   12.90    2.80
  -4 -12   0    9.70    3.30
  -4 -12   0   11.70    2.00
   4  12   0   12.40    3.10
   4  12   0    8.60    3.00
   4  12   0   12.70    5.20
   4  12   0    8.80    3.00
  -5 -12   0    9.40    3.20
  -5 -12   0   12.10    2.10
  -5 -12   0   13.80    2.90
   5  12   0    6.80    2.40
   5  12   0    6.50    2.70
   5  12   0   17.50    5.50
   5  12   0   11.70    3.40
  -6 -12   0    9.10    3.00
  -6 -12   0    2.80    1.50
  -6 -12   0    3.50    2.60
   6  12   0    5.00    2.60
   6  12   0   11.70    5.50
   6  12   0    6.80    2.90
   6  12   0    3.50    2.40
  -7 -12   0   21.30    3.10
  -7 -12   0   22.80    5.30
  -7 -12   0   25.90    4.00
   7  12   0   25.00    4.50
   7  12   0   30.30    5.00
   7  12   0   24.80    7.80
  -8 -12   0   -0.10    1.40
  -8 -12   0    4.40    3.20
  -8 -12   0    2.80    2.10
   8  12   0    3.00    2.70
   8  12   0   -3.40    5.80
   8  12   0    2.70    2.50
  -9 -12   0   17.80    3.30
  -9 -12   0   30.80    7.00
  -9 -12   0   19.30    6.60
   9  12   0   22.20    5.00
  13 -13   0   35.20    5.10
  13 -13   0   37.00    7.20
 -13  13   0   49.80    5.00
 -13  13   0   40.10    9.50
  12 -13   0    5.20    3.40
  12 -13   0   -0.10    1.80
 -12  13   0    0.50    1.80
 -12  13   0   10.60    3.70
 -12  13   0    0.40    3.90
  11 -13   0    3.90    3.00
  11 -13   0    4.90    2.20
 -11  13   0   -0.50    3.10
 -11  13   0    2.10    1.90
 -11  13   0    7.20    3.50
  10 -13   0   21.80    4.00
  10 -13   0   18.10    4.50
  10 -13   0   13.50    3.20
 -10  13   0   18.90    4.70
 -10  13   0   26.00    5.80
 -10  13   0   21.00    3.20
   9 -13   0    9.30    3.40
   9 -13   0    4.20    2.10
  -9  13   0    8.90    1.60
  -9  13   0    5.80    3.00
  -9  13   0    3.00    3.40
  -9  13   0    9.00    2.30
   8 -13   0   39.40    4.00
   8 -13   0   32.50    3.90
  -8  13   0   31.60    5.30
  -8  13   0   28.70    3.30
  -8  13   0   33.20    6.10
  -8  13   0   26.70    2.90
   7 -13   0    5.50    2.00
   7 -13   0    5.40    2.70
   7 -13   0    1.40    2.00
  -7  13   0    1.70    2.30
  -7  13   0    5.50    1.70
  -7  13   0    8.30    2.20
  -7  13   0    3.70    3.10
   6 -13   0   74.79    6.00
   6 -13   0   78.19    5.10
   6 -13   0   88.09    7.00
  -6  13   0   90.79    7.40
  -6  13   0   84.39    7.40
  -6  13   0   81.59    4.80
  -6  13   0   84.69    5.20
   5 -13   0    0.60    2.10
   5 -13   0    3.50    2.20
  -5  13   0    4.20    1.70
  -5  13   0    5.60    2.00
  -5  13   0    8.60    2.80
  -5  13   0    1.40    2.40
   4 -13   0    2.30    2.20
   4 -13   0    4.80    2.50
  -4  13   0   -1.00    1.90
  -4  13   0    1.20    1.30
  -4  13   0    0.60    1.10
  -4  13   0    2.50    2.20
   3 -13   0    3.00    1.40
   3 -13   0    2.30    2.10
   3 -13   0    0.70    1.70
  -3  13   0    1.80    1.50
  -3  13   0    1.10    2.60
  -3  13   0    2.70    1.60
  -3  13   0   -0.10    1.70
   2 -13   0    2.40    2.00
   2 -13   0    1.00    1.80
  -2  13   0   -1.10    1.90
  -2  13   0    0.40    1.40
  -2  13   0    1.60    1.80
  -2  13   0    1.40    1.30
   1 -13   0    2.60    2.10
   1 -13   0    1.00    1.80
  -1  13   0    1.80    1.50
  -1  13   0    0.40    2.40
  -1  13   0   -0.20    1.20
  -1  13   0   -0.40    1.70
   0 -13   0   24.30    3.90
   0 -13   0   27.60    4.50
   0  13   0   23.70    3.50
   0  13   0   28.00    3.40
   0  13   0   20.80    4.00
   0  13   0   24.10    5.00
  -1 -13   0   13.20    3.60
  -1 -13   0   16.30    2.00
  -1 -13   0   14.10    3.10
   1  13   0   12.50    2.80
   1  13   0   13.20    2.70
   1  13   0   18.90    4.00
   1  13   0   13.20    4.20
  -2 -13   0   11.70    3.60
  -2 -13   0   17.50    3.30
  -2 -13   0   18.20    2.40
   2  13   0   11.20    3.60
   2  13   0   14.10    3.00
   2  13   0    9.40    4.20
  -3 -13   0    6.30    1.70
  -3 -13   0   10.20    4.20
  -3 -13   0    8.50    2.90
   3  13   0    3.60    3.40
   3  13   0    9.70    3.10
   3  13   0    7.50    2.60
  -4 -13   0   72.79    5.80
  -4 -13   0   70.49    4.60
  -4 -13   0   75.49    4.00
  -4 -13   0   78.99    7.40
   4  13   0   74.09   10.40
   4  13   0   69.49    6.10
   4  13   0   68.69   11.00
   4  13   0   61.99    6.00
  -5 -13   0    5.40    2.90
  -5 -13   0    1.90    2.30
  -5 -13   0    1.80    1.30
   5  13   0    5.50    2.80
   5  13   0    0.80    4.00
   5  13   0    4.40    2.60
   5  13   0    2.50    2.50
  -6 -13   0    1.00    1.30
  -6 -13   0    3.00    2.30
  -6 -13   0    0.90    2.40
   6  13   0    3.00    2.30
   6  13   0    3.10    2.60
   6  13   0   -0.60    4.10
  -7 -13   0   22.10    4.00
  -7 -13   0   16.80    4.90
  -7 -13   0   22.20    3.10
   7  13   0   19.10    4.50
   7  13   0   38.30   10.50
   7  13   0   31.40    7.80
  -8 -13   0   63.79    7.00
  -8 -13   0   43.40    4.30
  -8 -13   0   30.30    7.20
   8  13   0   44.90    6.60
   8  13   0   33.80    5.40
  12 -14   0   32.70    6.20
  12 -14   0   27.80    4.40
 -12  14   0   29.70    7.70
 -12  14   0   21.80    3.60
  11 -14   0   16.20    4.30
  11 -14   0   15.60    3.70
  11 -14   0   17.60    4.10
 -11  14   0   17.00    4.50
 -11  14   0   12.90    2.20
 -11  14   0   10.40    2.80
 -11  14   0   12.70    4.90
  10 -14   0   -4.90    2.50
  10 -14   0   -1.80    1.40
 -10  14   0   -0.10    1.40
 -10  14   0    3.10    3.10
 -10  14   0    2.70    3.00
   9 -14   0   18.60    4.90
   9 -14   0    7.40    2.70
   9 -14   0   16.50    3.90
  -9  14   0   10.20    3.80
  -9  14   0   15.90    2.90
  -9  14   0   17.30    4.40
   8 -14   0   -1.40    1.50
   8 -14   0    0.40    2.10
   8 -14   0    3.30    1.80
  -8  14   0   -2.50    2.10
  -8  14   0    0.00    1.30
  -8  14   0    0.80    1.20
   7 -14   0    4.20    2.20
   7 -14   0    2.40    1.80
   7 -14   0    5.60    2.80
  -7  14   0    4.20    2.90
  -7  14   0    3.40    1.60
  -7  14   0    5.20    2.80
  -7  14   0    3.90    1.80
   6 -14   0   12.10    3.10
   6 -14   0   11.60    3.70
   6 -14   0   12.80    2.50
  -6  14   0    9.50    3.50
  -6  14   0    7.30    3.10
  -6  14   0   11.80    2.30
  -6  14   0   11.10    2.60
   5 -14   0    0.00    1.80
   5 -14   0    0.20    1.30
   5 -14   0    1.30    2.30
  -5  14   0    9.40    3.50
  -5  14   0    3.70    1.80
  -5  14   0    3.60    1.70
  -5  14   0    2.00    2.40
   4 -14   0   24.50    4.30
   4 -14   0   11.40    3.10
  -4  14   0   12.00    2.50
  -4  14   0   13.90    3.50
  -4  14   0   16.30    2.60
  -4  14   0   21.00    4.50
   3 -14   0   17.80    3.60
   3 -14   0   14.80    2.40
   3 -14   0   15.50    3.30
  -3  14   0   13.20    3.40
  -3  14   0   17.70    4.20
  -3  14   0   12.40    2.50
  -3  14   0   14.70    2.70
  -3  14   0   15.50    3.60
   2 -14   0   28.90    4.60
   2 -14   0   30.90    4.70
  -2  14   0   28.90    3.20
  -2  14   0   26.50    5.30
  -2  14   0   33.40    3.80
  -2  14   0   28.60    4.60
   1 -14   0    1.30    1.90
   1 -14   0    5.00    2.60
  -1  14   0    2.70    2.10
  -1  14   0    4.90    2.00
  -1  14   0    2.80    2.70
  -1  14   0    6.30    2.70
   0 -14   0    3.10    2.50
   0 -14   0    1.40    1.90
   0  14   0    1.50    1.70
   0  14   0    1.60    2.10
   0  14   0    1.10    1.40
   0  14   0   -0.30    2.40
  -1 -14   0   22.10    4.60
  -1 -14   0   21.40    2.20
   1  14   0   18.60    3.20
   1  14   0   17.60    3.90
   1  14   0   16.40    5.00
  -2 -14   0    3.20    1.40
  -2 -14   0    4.20    2.40
  -2 -14   0    4.50    2.60
   2  14   0    1.50    2.00
   2  14   0    2.60    2.10
   2  14   0    3.90    3.20
   2  14   0    1.90    2.30
  -3 -14   0   25.90    4.20
  -3 -14   0   26.90    2.90
   3  14   0   29.50    4.80
   3  14   0   25.20    4.10
   3  14   0   22.60    6.00
   3  14   0   23.20    4.60
  -4 -14   0    0.70    1.30
  -4 -14   0   -0.90    1.90
  -4 -14   0   -0.20    2.20
   4  14   0    4.90    5.30
   4  14   0    1.40    2.00
   4  14   0    1.40    2.50
   4  14   0   -0.30    2.10
  -5 -14   0   70.09    6.20
  -5 -14   0   57.99    9.40
  -5 -14   0   74.69    5.00
  -5 -14   0   67.19    4.00
   5  14   0   73.19   11.20
   5  14   0   65.59    6.30
   5  14   0   65.29    7.10
  -6 -14   0   31.50    3.20
  -6 -14   0   40.00    5.40
  -6 -14   0   29.90    5.90
   6  14   0   28.10    5.40
   6  14   0   24.80    4.80
  -7 -14   0    9.80    2.30
  -7 -14   0   10.40    3.30
   7  14   0    1.20    3.00
   7  14   0    6.40    3.30
  11 -15   0   -1.30    2.00
 -11  15   0   19.00    5.70
  10 -15   0    6.50    3.50
  10 -15   0    3.40    2.10
 -10  15   0    3.10    1.90
 -10  15   0    3.00    4.00
 -10  15   0    8.30    3.60
   9 -15   0   14.30    3.50
   9 -15   0    9.30    3.00
   9 -15   0   11.70    4.20
  -9  15   0   16.50    4.90
  -9  15   0    8.20    3.70
  -9  15   0   13.80    2.70
   8 -15   0    2.80    1.80
   8 -15   0    0.40    2.50
   8 -15   0    1.70    2.20
  -8  15   0    0.80    2.90
  -8  15   0   -0.10    2.40
  -8  15   0   -0.90    2.60
  -8  15   0    1.80    1.60
   7 -15   0    1.00    1.50
   7 -15   0    4.40    2.60
   7 -15   0    6.00    3.30
  -7  15   0    2.50    2.90
  -7  15   0    1.80    1.70
  -7  15   0    5.30    1.90
  -7  15   0    3.00    2.60
   6 -15   0   15.10    3.50
   6 -15   0   14.70    3.90
   6 -15   0   14.00    2.50
  -6  15   0   11.30    2.20
  -6  15   0   13.00    4.30
  -6  15   0   16.20    3.10
  -6  15   0   15.20    5.50
   5 -15   0   22.60    4.40
  -5  15   0   15.80    2.90
  -5  15   0   22.80    4.70
  -5  15   0   22.30    4.80
  -5  15   0   22.70    3.40
   4 -15   0    2.00    2.30
   4 -15   0    8.00    3.10
  -4  15   0    9.40    2.20
  -4  15   0    8.40    2.20
  -4  15   0   11.00    3.90
  -4  15   0    4.50    1.90
  -4  15   0    5.30    2.50
   3 -15   0    2.10    2.20
   3 -15   0   -3.20    1.50
  -3  15   0    1.00    1.50
  -3  15   0   -0.70    1.30
  -3  15   0   -0.20    1.50
  -3  15   0   -4.30    1.70
  -3  15   0   -0.70    1.80
   2 -15   0   -0.10    1.80
   2 -15   0   -0.10    1.20
   2 -15   0   -2.00    1.60
  -2  15   0    2.90    1.50
  -2  15   0    2.50    2.20
  -2  15   0   -1.40    2.30
  -2  15   0   -1.40    1.50
   1 -15   0   15.50    4.00
   1 -15   0   18.90    4.00
  -1  15   0   18.10    3.20
  -1  15   0   23.20    4.00
  -1  15   0   24.50    4.80
  -1  15   0   23.20    5.00
   0 -15   0    8.60    2.90
   0 -15   0    6.20    3.10
   0  15   0    5.40    3.10
   0  15   0    8.40    2.40
   0  15   0    1.20    3.50
  -1 -15   0   12.00    3.60
   1  15   0   18.10    5.50
   1  15   0    9.90    3.40
   1  15   0   11.70    3.10
   1  15   0   11.10    2.70
   1  15   0   15.80    3.40
  -2 -15   0   -3.40    1.70
  -2 -15   0   -2.10    2.10
  -2 -15   0    0.30    1.10
   2  15   0    1.80    2.60
   2  15   0   -2.40    1.60
   2  15   0    1.50    4.00
   2  15   0   -0.10    2.40
  -3 -15   0   33.90    3.30
  -3 -15   0   28.10    5.60
  -3 -15   0   30.20    4.50
   3  15   0   36.60    5.10
   3  15   0   43.40    8.60
   3  15   0   33.00    5.80
   3  15   0   30.70    4.90
  -4 -15   0    7.30    2.90
  -4 -15   0    3.90    1.80
  -4 -15   0    5.00    3.40
   4  15   0    6.60    2.80
   4  15   0    1.90    4.50
   4  15   0    5.00    2.70
  -5 -15   0   -3.00    3.00
  -5 -15   0    1.20    1.60
  -5 -15   0   -0.50    2.40
   5  15   0   -4.00    2.20
   5  15   0   -0.90    2.00
  10 -16   0    5.00    2.90
  10 -16   0    0.70    2.40
 -10  16   0   -4.80    2.80
 -10  16   0   -3.10    1.60
   9 -16   0   -0.40    2.70
   9 -16   0    4.40    2.20
   9 -16   0   -0.60    1.90
  -9  16   0    4.50    1.90
  -9  16   0   -3.00    3.20
   8 -16   0   83.69    5.70
   8 -16   0   85.79    7.30
   8 -16   0   79.59    8.00
  -8  16   0   74.09    5.20
  -8  16   0   78.09    8.50
  -8  16   0   90.29    8.90
  -8  16   0   85.99    5.30
   7 -16   0   10.10    2.40
   7 -16   0    5.00    3.10
   7 -16   0    8.30    3.70
  -7  16   0    4.50    3.20
  -7  16   0    5.00    2.10
  -7  16   0   12.40    4.20
  -7  16   0   10.80    2.60
   6 -16   0    1.30    2.40
   6 -16   0    0.80    1.90
  -6  16   0    1.60    1.50
  -6  16   0   -0.90    1.50
  -6  16   0    2.00    2.40
  -6  16   0   -3.50    2.90
   5 -16   0   34.80    5.50
   5 -16   0   37.40    6.60
  -5  16   0   43.60    6.40
  -5  16   0   51.89    4.30
  -5  16   0   44.80    7.30
  -5  16   0   46.40    4.20
   4 -16   0    1.50    2.20
  -4  16   0   -0.20    1.40
  -4  16   0    0.10    2.00
  -4  16   0    0.20    2.20
  -4  16   0   -1.80    1.50
   3 -16   0   36.50    5.70
  -3  16   0   34.40    5.50
  -3  16   0   38.30    3.80
  -3  16   0   36.80    4.20
  -3  16   0   41.70    4.30
   2 -16   0    2.90    2.40
   2 -16   0    1.30    1.50
  -2  16   0    3.20    2.40
  -2  16   0   11.00    6.70
  -2  16   0    0.20    1.60
   1 -16   0    9.80    3.20
   1 -16   0    3.50    2.80
  -1  16   0   11.00    4.50
  -1  16   0    9.10    3.30
  -1  16   0    6.90    2.50
  -1  16   0    9.10    3.30
   0 -16   0   77.59    7.50
   0 -16   0   69.49    6.60
   0  16   0   62.19    5.30
   0  16   0   63.99    6.00
   0  16   0   61.69    9.20
   0  16   0   62.49    6.60
  -1 -16   0    0.40    2.50
  -1 -16   0   -1.40    3.80
   1  16   0    3.90    2.90
   1  16   0    8.30    2.70
   1  16   0    8.20    4.50
   1  16   0    4.40    4.50
  -2 -16   0    2.20    2.50
  -2 -16   0    3.90    1.30
  -2 -16   0   -3.00    2.70
   2  16   0   -7.80    3.50
   2  16   0   -0.50    2.00
   2  16   0    2.70    2.50
   2  16   0    3.40    3.20
   2  16   0    6.30    2.30
  -3 -16   0    0.70    2.40
  -3 -16   0    3.80    1.60
  -3 -16   0    1.40    2.60
   3  16   0    1.30    2.20
   3  16   0   -1.50    2.70
  -4 -16   0   21.80    3.10
  -4 -16   0   19.60    4.20
   4  16   0   22.00    5.00
   4  16   0   16.10    4.00
   9 -17   0   -1.60    2.60
  -9  17   0   -1.60    1.60
   8 -17   0    0.60    2.20
   8 -17   0    2.20    2.70
  -8  17   0    1.40    1.80
  -8  17   0    7.20    3.30
   7 -17   0    5.60    2.90
   7 -17   0   11.00    4.00
  -7  17   0   13.20    2.80
  -7  17   0    6.20    2.50
  -7  17   0    4.70    3.40
   6 -17   0   21.90    5.00
   6 -17   0   21.70    4.40
  -6  17   0   19.40    4.60
  -6  17   0   21.00    3.60
  -6  17   0   18.90    3.30
  -6  17   0   23.10    3.80
   5 -17   0   -1.50    2.30
   5 -17   0    2.70    2.90
  -5  17   0    2.90    1.80
  -5  17   0   -0.40    3.30
  -5  17   0    6.20    3.30
  -5  17   0    1.00    1.80
  -5  17   0    0.60    1.70
   4 -17   0   22.90    4.50
   4 -17   0   14.10    3.80
  -4  17   0   26.90    5.20
  -4  17   0   12.70    3.00
  -4  17   0   14.80    3.20
  -4  17   0   20.50    3.10
  -4  17   0   20.70    5.60
   3 -17   0    2.60    2.40
   3 -17   0    1.50    2.40
  -3  17   0   -2.70    2.20
  -3  17   0   -1.10    1.50
  -3  17   0    1.40    2.30
  -3  17   0   -5.20    2.60
   2 -17   0   -0.80    2.30
   2 -17   0    1.00    1.70
   2 -17   0    6.10    3.10
  -2  17   0    0.70    1.80
  -2  17   0    0.90    1.60
  -2  17   0    2.50    2.10
  -2  17   0    4.10    2.80
  -2  17   0    3.50    3.60
   1 -17   0    0.00    2.50
   1 -17   0    8.50    3.60
  -1  17   0    4.20    2.10
  -1  17   0    7.00    3.20
  -1  17   0    2.40    5.60
  -1  17   0    8.30    3.10
   0 -17   0    2.10    2.30
   0  17   0    0.10    2.10
   0  17   0   -1.30    2.10
   0  17   0   -1.10    2.20
  -1 -17   0    8.00    3.30
  -1 -17   0    7.80    3.40
   1  17   0   12.00    4.10
   1  17   0    4.80    2.70
   1  17   0    1.00    2.80
  -2 -17   0    1.90    2.70
   2  17   0    0.20    3.10
   2  17   0    3.80    2.30
   2  17   0   -1.10    2.20
   6 -18   0    3.80    3.30
  -6  18   0    1.40    2.00
  -6  18   0    2.90    2.20
  -6  18   0    4.40    3.20
  -6  18   0   -0.80    2.40
   5 -18   0   -1.40    2.50
  -5  18   0    2.10    3.10
  -5  18   0    2.90    2.10
  -5  18   0   -3.50    1.50
   4 -18   0    2.30    2.70
  -4  18   0   -1.60    1.50
  -4  18   0   -1.00    2.60
  -4  18   0    0.00    2.10
  -4  18   0    0.60    2.30
   3 -18   0    0.00    2.50
  -3  18   0   -3.00    1.70
  -3  18   0   -0.80    1.70
  -3  18   0    2.10    2.50
  -3  18   0    4.70    3.10
   2 -18   0    7.10    2.40
   2 -18   0    7.20    3.20
  -2  18   0    4.20    5.20
  -2  18   0   10.40    2.90
  -2  18   0    8.00    3.70
   1 -18   0    3.00    2.70
   1 -18   0    0.20    1.70
  -1  18   0   -0.70    2.60
  -1  18   0    2.10    2.50
  -1  18   0    4.30    2.80
   0  18  -1   10.90    3.70
   0  18  -1   14.90    3.60
   0  18  -1   16.60    4.10
  -1  18  -1    0.30    2.50
  -1  18  -1    3.70    2.40
  -1  18  -1   -1.00    2.30
   1 -18   1    3.20    2.10
   1 -18   1   -0.10    2.30
  -2  18  -1   12.70    3.90
  -2  18  -1   19.20    4.30
  -2  18  -1   18.10    3.70
  -2  18  -1   20.70    3.60
   2 -18   1   23.90    3.30
   2 -18   1   11.70    3.90
  -3  18  -1   -0.70    1.70
  -3  18  -1    3.50    2.80
  -3  18  -1    0.50    1.80
   3 -18   1   -1.90    2.10
  -4  18  -1   31.90    4.40
  -4  18  -1   33.60    5.90
  -4  18  -1   28.70    4.10
  -4  18  -1   32.40    4.20
   4 -18   1   24.20    5.10
  -5  18  -1   10.30    4.10
  -5  18  -1    9.30    2.90
  -5  18  -1    4.90    2.40
  -5  18  -1   17.80    4.40
   5 -18   1   13.20    4.30
  -6  18  -1   14.70    4.60
  -6  18  -1   10.10    2.70
  -6  18  -1    9.40    2.70
   6 -18   1   17.50    4.60
  -7  18  -1   -0.70    2.10
  -7  18  -1   -1.00    1.40
   7 -18   1    0.30    2.60
   3  17  -1   13.70    5.30
   3  17  -1   23.70    4.60
   3  17  -1   24.00    5.10
  -3 -17   1   34.10    4.90
   2  17  -1   -1.90    2.70
   2  17  -1    2.10    2.40
   2  17  -1    2.50    2.40
   2  17  -1   -5.50    2.30
  -2 -17   1    2.90    2.60
   1  17  -1    2.80    2.30
   1  17  -1   -1.10    2.40
   1  17  -1    3.40    2.20
  -1 -17   1    2.30    2.70
  -1 -17   1   -2.60    2.20
   0  17  -1   11.10    3.10
   0  17  -1   13.00    3.60
   0  17  -1   15.20    4.00
   0 -17   1   13.70    3.80
  -1  17  -1    7.10    2.40
  -1  17  -1    4.10    2.70
  -1  17  -1    4.00    2.50
  -1  17  -1    5.20    2.30
   1 -17   1    2.20    2.50
   1 -17   1    1.70    2.70
  -2  17  -1    4.00    2.60
  -2  17  -1    3.90    3.60
  -2  17  -1    2.70    1.90
  -2  17  -1   -1.80    1.60
   2 -17   1    0.00    2.00
  -3  17  -1   -2.40    2.50
  -3  17  -1    5.30    2.80
  -3  17  -1    1.40    1.90
  -3  17  -1   -0.20    1.80
  -3  17  -1    2.10    1.80
   3 -17   1    3.20    2.40
  -4  17  -1   10.30    3.30
  -4  17  -1   11.20    2.50
  -4  17  -1    9.80    4.20
  -4  17  -1   11.40    3.30
  -4  17  -1    5.00    2.30
   4 -17   1   11.90    3.30
  -5  17  -1    4.00    2.80
  -5  17  -1    2.00    2.10
  -5  17  -1    7.10    2.40
  -5  17  -1   -0.80    1.90
  -5  17  -1    5.20    4.40
   5 -17   1    2.10    2.90
   5 -17   1   -2.10    2.10
  -6  17  -1    8.00    2.30
  -6  17  -1    2.70    2.20
  -6  17  -1    9.40    3.60
   6 -17   1    3.40    2.50
   6 -17   1    8.00    3.50
  -7  17  -1   34.20    6.40
  -7  17  -1   47.00    4.70
   7 -17   1   36.60    5.60
   7 -17   1   37.20    6.10
   7 -17   1   40.70    4.60
  -8  17  -1   11.80    4.10
  -8  17  -1   10.90    2.50
   8 -17   1    9.60    2.70
   8 -17   1   12.10    3.90
  -9  17  -1   22.00    5.40
   9 -17   1    9.90    3.30
   9 -17   1   22.00    4.90
   4  16  -1    0.00    2.00
   4  16  -1    3.20    2.60
  -4 -16   1    5.60    2.50
  -4 -16   1    0.80    3.00
  -4 -16   1    0.80    1.50
   3  16  -1   -0.50    2.10
   3  16  -1    0.00    2.00
   3  16  -1   -1.60    1.80
   3  16  -1   -4.40    2.00
  -3 -16   1    4.00    2.80
  -3 -16   1   -1.40    1.10
  -3 -16   1    3.10    2.60
   2  16  -1   16.00    3.20
   2  16  -1   13.90    3.10
   2  16  -1   20.60    5.90
   2  16  -1   20.50    4.60
   2  16  -1   14.60    5.70
  -2 -16   1   12.50    3.90
  -2 -16   1   19.70    4.20
   1  16  -1   32.60    7.00
   1  16  -1   37.50    4.80
   1  16  -1   35.00    6.10
   1  16  -1   30.70    4.50
  -1 -16   1   36.20    9.80
  -1 -16   1   27.90    4.80
   0  16  -1    0.10    3.50
   0  16  -1    3.40    2.10
   0  16  -1    5.60    2.90
   0 -16   1    1.60    2.30
   0 -16   1    4.80    2.80
  -1  16  -1    1.70    2.10
  -1  16  -1    0.90    1.80
  -1  16  -1    5.50    3.60
  -1  16  -1    0.90    1.50
   1 -16   1    2.50    2.30
   1 -16   1    1.90    2.20
  -2  16  -1    5.90    3.30
  -2  16  -1    1.70    1.50
  -2  16  -1   -0.40    1.70
  -2  16  -1    3.40    2.00
  -2  16  -1    1.10    2.10
   2 -16   1    2.70    1.60
   2 -16   1    5.30    2.60
   2 -16   1    7.60    3.20
  -3  16  -1   -0.80    1.50
  -3  16  -1   -1.80    1.30
  -3  16  -1   -0.40    1.40
  -3  16  -1    4.70    4.20
  -3  16  -1    0.40    1.90
   3 -16   1   -0.10    2.20
   3 -16   1    0.00    1.80
  -4  16  -1   24.60    5.90
  -4  16  -1   16.90    2.90
  -4  16  -1   22.60    4.70
  -4  16  -1   17.10    3.70
  -4  16  -1   15.90    3.00
  -4  16  -1   19.20    3.30
   4 -16   1   17.10    3.90
   4 -16   1   21.10    4.30
  -5  16  -1    4.50    1.90
  -5  16  -1    6.00    2.20
  -5  16  -1    9.30    3.20
  -5  16  -1    9.10    3.80
  -5  16  -1    0.60    1.90
   5 -16   1    9.60    3.60
   5 -16   1    6.80    2.80
  -6  16  -1   47.60    4.10
  -6  16  -1   42.90    4.20
  -6  16  -1   62.79   10.50
  -6  16  -1   50.69    7.30
   6 -16   1   38.70    6.40
   6 -16   1   41.10    5.10
   6 -16   1   48.70    4.60
  -7  16  -1    3.20    3.50
  -7  16  -1    4.60    3.10
  -7  16  -1    5.50    2.00
  -7  16  -1    4.10    1.90
   7 -16   1    5.60    4.30
  -8  16  -1    1.50    3.50
  -8  16  -1    4.50    1.80
  -8  16  -1    5.30    2.10
  -8  16  -1    5.70    3.40
   8 -16   1    2.00    2.00
   8 -16   1    1.80    2.30
   8 -16   1    3.80    3.30
  -9  16  -1   17.80    5.30
   9 -16   1   14.00    4.30
   9 -16   1   15.50    3.80
   9 -16   1   19.80    3.90
 -10  16  -1   34.50    7.30
  10 -16   1   56.39    7.60
   6  15  -1   15.50    4.10
   6  15  -1    9.90    4.00
  -6 -15   1   17.30    3.00
  -6 -15   1    7.80    3.20
   5  15  -1    8.80    3.70
   5  15  -1   15.20    3.90
  -5 -15   1   19.50    4.80
  -5 -15   1   11.80    2.40
  -5 -15   1   19.40    3.70
   4  15  -1   11.20    5.20
   4  15  -1   11.60    3.90
   4  15  -1   15.70    5.00
   4  15  -1   14.10    3.60
  -4 -15   1   12.80    4.10
  -4 -15   1   17.00    3.60
  -4 -15   1   13.50    2.50
   3  15  -1   65.39    6.30
   3  15  -1   54.19    8.80
   3  15  -1   67.29   12.80
   3  15  -1   55.59    7.00
  -3 -15   1   68.69    7.30
  -3 -15   1   71.09    6.20
  -3 -15   1   61.89    3.90
   2  15  -1   11.60    3.10
   2  15  -1   21.80    4.10
   2  15  -1   20.20    7.70
   2  15  -1    8.90    2.80
   2  15  -1   12.90    3.20
  -2 -15   1   20.30    2.20
  -2 -15   1   15.00    3.60
  -2 -15   1   18.30    3.90
   1  15  -1    6.90    2.90
   1  15  -1   10.00    2.80
   1  15  -1    7.20    2.70
  -1 -15   1    7.80    3.20
   0  15  -1    6.80    3.00
   0  15  -1    6.40    2.40
   0  15  -1    9.40    2.60
   0  15  -1    3.20    3.10
   0 -15   1    6.40    2.90
   0 -15   1    9.10    2.90
  -1  15  -1   40.30    4.20
  -1  15  -1   45.90    7.30
  -1  15  -1   39.30    5.60
  -1  15  -1   47.30    5.60
   1 -15   1   39.30    5.50
   1 -15   1   46.60    5.50
  -2  15  -1    9.10    3.30
  -2  15  -1    5.50    2.00
  -2  15  -1    8.70    2.40
  -2  15  -1    6.00    2.10
  -2  15  -1   17.20    4.70
   2 -15   1    5.00    2.70
   2 -15   1    7.40    2.80
  -3  15  -1   62.99    5.00
  -3  15  -1   68.59    4.80
  -3  15  -1   64.39    6.30
  -3  15  -1   71.79    7.30
  -3  15  -1   63.69    4.70
   3 -15   1   73.09    6.60
   3 -15   1   64.99    6.20
  -4  15  -1    8.70    3.00
  -4  15  -1    8.10    2.10
  -4  15  -1    6.90    3.60
  -4  15  -1    7.00    2.10
  -4  15  -1    9.80    2.20
   4 -15   1   12.00    3.30
   4 -15   1    5.60    2.80
  -5  15  -1   -2.10    1.50
  -5  15  -1    0.40    1.40
  -5  15  -1   -1.40    1.20
  -5  15  -1   -1.70    2.00
   5 -15   1   -1.70    1.20
   5 -15   1    0.20    1.90
   5 -15   1    2.50    2.30
  -6  15  -1   57.99    6.80
  -6  15  -1   45.70    3.90
  -6  15  -1   45.90    4.10
  -6  15  -1   47.20    6.90
   6 -15   1   51.89    6.20
   6 -15   1   49.50    4.50
   6 -15   1   50.59    5.40
  -7  15  -1   47.10    4.10
  -7  15  -1   44.40    6.90
  -7  15  -1   46.90    3.80
   7 -15   1   33.80    5.00
   7 -15   1   52.69    4.80
   7 -15   1   52.79    6.40
  -8  15  -1    5.10    2.00
  -8  15  -1    5.60    1.90
  -8  15  -1    6.60    3.70
   8 -15   1    6.20    3.40
   8 -15   1    7.10    2.60
   8 -15   1    3.50    2.30
  -9  15  -1   82.79    5.00
  -9  15  -1   96.79    9.30
   9 -15   1   91.89    7.00
   9 -15   1   74.99    9.10
   9 -15   1  127.19   10.20
 -10  15  -1    8.10    4.00
  10 -15   1    1.80    2.50
  10 -15   1    0.30    2.00
  10 -15   1    4.10    3.60
 -11  15  -1   -7.10    3.20
 -11  15  -1    0.70    1.20
  11 -15   1    1.20    2.80
  11 -15   1    4.40    2.70
   7  14  -1    2.70    2.50
   7  14  -1    4.00    2.90
  -7 -14   1    6.20    5.00
  -7 -14   1    2.30    1.50
  -7 -14   1    3.80    2.20
   6  14  -1   22.90    4.50
   6  14  -1   26.50    5.20
  -6 -14   1   19.30    3.80
  -6 -14   1   24.40    2.60
  -6 -14   1   18.30    4.60
   5  14  -1   18.70    6.10
   5  14  -1   15.90    4.00
   5  14  -1   10.20    3.10
   5  14  -1    6.60    3.10
  -5 -14   1   13.10    4.10
   4  14  -1   13.30    3.60
   4  14  -1   11.10    3.10
   4  14  -1   11.80    8.50
   4  14  -1   15.50    4.60
  -4 -14   1   12.50    3.20
  -4 -14   1   15.40    2.50
  -4 -14   1   13.60    3.80
   3  14  -1    3.50    2.30
   3  14  -1   -0.80    1.60
   3  14  -1    2.10    2.20
   3  14  -1   -0.70    3.00
  -3 -14   1    0.70    1.10
  -3 -14   1    5.30    2.60
  -3 -14   1    0.90    2.20
   2  14  -1    6.10    4.00
   2  14  -1    8.50    2.90
  -2 -14   1   10.20    1.70
  -2 -14   1   10.10    3.00
  -2 -14   1    9.20    2.90
   1  14  -1    4.30    2.10
   1  14  -1    5.00    3.60
   1  14  -1    3.30    2.20
   1  14  -1    4.80    2.60
   1  14  -1    6.20    2.20
  -1 -14   1   10.10    3.20
  -1 -14   1    9.80    3.00
   0  14  -1    0.20    1.40
   0  14  -1    1.70    1.60
   0  14  -1    0.90    2.40
   0  14  -1    5.60    2.90
   0 -14   1    0.10    1.70
   0 -14   1    0.10    1.60
  -1  14  -1   12.50    2.70
  -1  14  -1    7.70    2.90
  -1  14  -1   11.50    4.00
  -1  14  -1   10.70    2.60
   1 -14   1   15.30    3.50
   1 -14   1    9.50    3.00
  -2  14  -1   -0.20    1.40
  -2  14  -1    1.70    1.50
  -2  14  -1   -0.20    1.30
  -2  14  -1   -1.00    1.70
  -2  14  -1   -3.50    1.90
   2 -14   1    0.60    1.50
   2 -14   1   -0.10    1.60
  -3  14  -1    0.20    1.30
  -3  14  -1   -0.50    1.10
  -3  14  -1   -3.20    1.80
  -3  14  -1   -0.30    1.70
  -3  14  -1    0.90    1.30
   3 -14   1    0.70    1.80
   3 -14   1    1.90    2.10
  -4  14  -1   46.80    6.50
  -4  14  -1   38.40    3.50
  -4  14  -1   41.90    5.10
  -4  14  -1   39.50    3.80
   4 -14   1   42.90    3.90
   4 -14   1   39.60    4.80
   4 -14   1   40.90    4.70
  -5  14  -1    7.50    3.20
  -5  14  -1    8.90    3.10
  -5  14  -1   10.60    2.30
  -5  14  -1    5.70    2.00
   5 -14   1    8.20    2.10
   5 -14   1    7.00    2.60
   5 -14   1   10.20    3.20
  -6  14  -1   27.20    3.20
  -6  14  -1   28.50    5.20
  -6  14  -1   32.20    5.50
   6 -14   1   28.90    4.40
   6 -14   1   31.70    3.80
   6 -14   1   30.60    5.10
  -7  14  -1    4.80    1.70
  -7  14  -1    6.30    3.30
  -7  14  -1    2.30    2.40
  -7  14  -1    0.60    1.40
   7 -14   1    2.90    2.00
   7 -14   1    1.30    2.30
   7 -14   1    3.80    2.20
  -8  14  -1    3.50    1.50
  -8  14  -1    5.80    3.20
  -8  14  -1    6.20    1.90
  -8  14  -1    9.10    3.40
   8 -14   1    4.70    2.40
   8 -14   1   -0.60    1.50
   8 -14   1    8.70    4.70
  -9  14  -1   49.70    3.90
  -9  14  -1   48.40    8.60
  -9  14  -1   41.80    7.10
   9 -14   1   44.10    4.90
   9 -14   1   53.09    6.60
 -10  14  -1   13.10    4.70
 -10  14  -1   21.60    5.10
 -10  14  -1   12.00    2.40
  10 -14   1   16.20    4.60
  10 -14   1    8.70    3.40
  10 -14   1   12.70    3.60
 -11  14  -1   21.30    5.90
 -11  14  -1   19.20    2.90
  11 -14   1   16.90    4.80
  11 -14   1   16.90    3.60
  11 -14   1   15.70    3.80
 -12  14  -1   19.30    5.80
  12 -14   1   10.10    4.10
   8  13  -1    6.70    3.20
   8  13  -1    1.50    2.90
  -8 -13   1    9.20    2.20
  -8 -13   1   12.20    4.30
  -8 -13   1    7.90    3.00
   7  13  -1   28.20    5.20
   7  13  -1   30.00    5.50
   7  13  -1   18.40    6.70
  -7 -13   1   24.60    4.00
  -7 -13   1   18.60    5.00
  -7 -13   1   18.80    2.70
   6  13  -1    3.00    2.60
   6  13  -1    3.80    4.70
   6  13  -1    2.60    2.10
   6  13  -1    3.50    2.20
  -6 -13   1   -0.40    2.00
  -6 -13   1   -0.10    2.50
  -6 -13   1    0.80    1.10
   5  13  -1    5.50    4.50
   5  13  -1   -3.50    1.60
   5  13  -1   -2.20    1.70
  -5 -13   1    1.60    2.00
  -5 -13   1    0.30    1.20
  -5 -13   1   -1.60    2.10
   4  13  -1    8.50    4.30
   4  13  -1    3.20    2.20
   4  13  -1    5.60    2.50
   4  13  -1   12.70    3.40
  -4 -13   1    8.40    2.50
  -4 -13   1    6.40    2.90
   3  13  -1    2.30    1.90
   3  13  -1   -1.60    1.60
   3  13  -1   -1.60    2.80
  -3 -13   1    0.40    1.70
  -3 -13   1   -0.40    1.70
  -3 -13   1    1.70    1.10
   2  13  -1   92.79    6.50
   2  13  -1   93.29    6.40
   2  13  -1   93.89    9.00
   2  13  -1   96.39    7.20
  -2 -13   1  103.69    7.80
  -2 -13   1   96.69    4.30
  -2 -13   1   98.29    6.30
   1  13  -1   96.89    8.40
   1  13  -1   85.99    5.90
   1  13  -1   75.29    6.40
   1  13  -1   87.89    5.80
  -1 -13   1   84.59    6.00
  -1 -13   1   87.99    3.60
  -1 -13   1   93.49    7.20
   0  13  -1   16.40    3.50
   0  13  -1   20.40    3.20
   0  13  -1   28.90    7.10
   0  13  -1   19.50    3.20
   0  13  -1   19.50    4.30
   0 -13   1   21.10    3.70
   0 -13   1   20.10    3.90
  -1  13  -1    1.90    1.30
  -1  13  -1    0.10    1.60
  -1  13  -1    1.10    2.20
  -1  13  -1    0.70    1.30
   1 -13   1   -0.80    1.40
   1 -13   1    0.30    1.40
  -2  13  -1    3.90    2.40
  -2  13  -1    0.70    1.70
  -2  13  -1    1.00    1.40
  -2  13  -1    3.40    1.60
   2 -13   1    2.10    2.00
   2 -13   1    5.20    2.30
  -3  13  -1  114.09    5.70
  -3  13  -1  116.89    8.20
  -3  13  -1  113.39    5.50
  -3  13  -1  116.49    7.70
  -3  13  -1   99.79    8.90
   3 -13   1  117.79    7.40
   3 -13   1  119.99    7.40
  -4  13  -1   55.69    5.60
  -4  13  -1   49.70    5.70
  -4  13  -1   52.79    4.10
  -4  13  -1   57.59    3.90
   4 -13   1   62.09    5.50
   4 -13   1   52.49    4.30
   4 -13   1   57.99    5.70
  -5  13  -1    7.70    2.10
  -5  13  -1    8.80    2.20
  -5  13  -1   13.90    3.80
  -5  13  -1    5.80    2.50
   5 -13   1   13.60    3.10
   5 -13   1   11.80    3.30
   5 -13   1   12.00    2.60
  -6  13  -1    6.10    2.80
  -6  13  -1    5.00    1.70
  -6  13  -1    5.40    2.90
  -6  13  -1    6.10    1.80
   6 -13   1    7.30    2.90
   6 -13   1    4.20    2.10
   6 -13   1    9.20    2.40
  -7  13  -1   20.70    4.20
  -7  13  -1   23.50    4.90
  -7  13  -1   19.40    2.70
  -7  13  -1   23.50    2.80
   7 -13   1   14.50    3.10
   7 -13   1   19.40    4.10
   7 -13   1   23.90    3.70
  -8  13  -1   21.90    3.10
  -8  13  -1   19.50    4.50
  -8  13  -1   17.40    4.50
   8 -13   1   18.00    3.50
   8 -13   1   28.00    4.80
  -9  13  -1   86.69    7.70
  -9  13  -1   79.19    8.10
  -9  13  -1   75.29    4.60
   9 -13   1   79.99    6.10
   9 -13   1   87.39   12.60
   9 -13   1   77.09    6.00
 -10  13  -1   25.80   10.00
 -10  13  -1   15.40    2.90
  10 -13   1   23.60    4.80
  10 -13   1   21.20    3.80
 -11  13  -1   36.00    6.20
 -11  13  -1   33.00    3.50
 -11  13  -1   25.60    6.70
  11 -13   1   33.10    5.70
  11 -13   1   43.60    6.80
 -12  13  -1   25.90    3.60
 -12  13  -1   22.80    6.70
  12 -13   1   30.20    5.50
  12 -13   1   24.60    4.20
 -13  13  -1   33.90    8.20
  13 -13   1   40.70    6.60
   9  12  -1   77.99    7.50
   9  12  -1   57.19    8.50
  -9 -12   1   65.19    8.10
  -9 -12   1   70.39    5.80
  -9 -12   1   69.59    5.10
   8  12  -1   22.90    1.80
   8  12  -1   28.20    4.90
   8  12  -1   27.80    8.40
   8  12  -1   23.70    5.00
  -8 -12   1   19.10    2.90
  -8 -12   1   30.10    5.90
  -8 -12   1   24.80    3.90
   7  12  -1   14.90    3.80
   7  12  -1   16.40    6.20
   7  12  -1   11.10    3.20
   7  12  -1   13.30    4.00
  -7 -12   1   14.00    4.40
  -7 -12   1   12.40    4.10
  -7 -12   1   12.90    2.20
   6  12  -1   71.49   10.90
   6  12  -1   58.39    6.10
   6  12  -1   63.49    7.40
   6  12  -1   73.09    6.60
  -6 -12   1   72.89    5.70
  -6 -12   1   69.89    7.10
  -6 -12   1   69.69    4.10
   5  12  -1   28.10    4.80
   5  12  -1   23.60    4.20
   5  12  -1   32.60    6.80
   5  12  -1   19.10    3.80
  -5 -12   1   20.10    2.40
  -5 -12   1   26.20    4.80
  -5 -12   1   23.00    3.50
   4  12  -1    7.40    2.40
   4  12  -1    5.10    2.40
   4  12  -1    2.90    3.30
  -4 -12   1    0.60    2.00
  -4 -12   1    2.50    1.90
  -4 -12   1    4.10    1.20
   3  12  -1   30.80    4.60
   3  12  -1   25.90    5.40
   3  12  -1   27.70    4.10
   3  12  -1   18.10    3.60
  -3 -12   1   15.60    3.70
  -3 -12   1   23.90    3.50
   2  12  -1    8.80    3.50
   2  12  -1   13.70    3.00
   2  12  -1    5.70    2.40
   2  12  -1   10.30    2.70
  -2 -12   1    9.00    1.60
  -2 -12   1    6.90    2.70
  -2 -12   1   10.20    2.50
   1  12  -1   17.40    4.30
   1  12  -1   22.20    3.90
   1  12  -1   24.10    3.60
   1  12  -1   28.10    3.90
  -1 -12   1   20.80    3.50
  -1 -12   1   28.80    4.50
  -1 -12   1   30.00    2.30
   0  12  -1    1.70    1.60
   0  12  -1    2.30    1.60
   0  12  -1    0.90    1.30
   0  12  -1    2.90    2.40
   0  12  -1    1.40    1.80
   0 -12   1    0.70    2.00
   0 -12   1    1.90    1.80
  -1  12  -1   42.00    3.70
  -1  12  -1   35.70    4.40
  -1  12  -1   47.50    5.40
  -1  12  -1   32.00    3.30
   1 -12   1   41.10    4.50
   1 -12   1   42.10    4.40
  -2  12  -1  303.27   12.20
  -2  12  -1  303.57    9.60
  -2  12  -1  301.67   10.00
  -2  12  -1  298.17   12.90
   2 -12   1  309.57   12.10
   2 -12   1  297.97   11.60
  -3  12  -1   33.10    4.70
  -3  12  -1   41.20    5.00
  -3  12  -1   38.50    3.30
  -3  12  -1   42.50    3.60
   3 -12   1   33.70    3.40
   3 -12   1   35.60    4.10
   3 -12   1   35.20    4.40
  -4  12  -1    3.40    1.60
  -4  12  -1    2.40    1.50
  -4  12  -1    0.50    1.10
  -4  12  -1    0.40    1.70
  -4  12  -1    3.70    2.10
   4 -12   1    1.70    1.50
   4 -12   1    0.20    1.60
   4 -12   1    0.60    1.80
  -5  12  -1   68.39    4.40
  -5  12  -1   68.49    6.00
  -5  12  -1   71.19    4.30
  -5  12  -1   62.19    5.90
   5 -12   1   67.29    4.80
   5 -12   1   63.89    5.40
   5 -12   1   70.59    5.90
  -6  12  -1   39.70    5.60
  -6  12  -1   35.00    3.20
  -6  12  -1   34.40    5.20
  -6  12  -1   39.30    3.40
   6 -12   1   37.70    4.30
   6 -12   1   37.60    5.10
   6 -12   1   34.90    3.90
  -7  12  -1  104.39    5.10
  -7  12  -1   95.59    7.70
  -7  12  -1  108.29    7.80
  -7  12  -1   95.29    5.00
   7 -12   1  101.39    6.30
   7 -12   1   92.49    7.20
   7 -12   1   91.49    6.20
  -8  12  -1   69.99    6.60
  -8  12  -1   51.59    6.30
  -8  12  -1   59.29    4.10
   8 -12   1   62.09    6.30
   8 -12   1   65.79    5.30
   8 -12   1   64.49    5.30
  -9  12  -1    1.50    2.20
  -9  12  -1    0.50    1.20
  -9  12  -1    3.30    2.80
   9 -12   1   -1.20    1.20
   9 -12   1   -1.00    1.70
 -10  12  -1   38.40    3.70
 -10  12  -1   45.70    6.60
 -10  12  -1   45.80    8.00
  10 -12   1   43.80    3.20
  10 -12   1   43.80    7.40
  10 -12   1   56.29    4.90
 -11  12  -1   -0.50    1.40
 -11  12  -1   -6.60    2.60
 -11  12  -1   -0.80    3.00
  11 -12   1    0.80    1.90
  11 -12   1   -3.20    2.10
  11 -12   1    2.30    1.30
 -12  12  -1   12.00    4.30
 -12  12  -1    9.40    2.60
 -12  12  -1    8.90    4.60
  12 -12   1    7.50    3.60
  12 -12   1   11.90    2.20
 -13  12  -1   25.80    7.40
 -13  12  -1   31.70    4.20
  13 -12   1   31.50    3.50
  13 -12   1   39.30    4.80
  13 -12   1   36.90    6.40
  10  11  -1    9.90    3.40
 -10 -11   1   20.10    3.80
 -10 -11   1   11.30    4.40
 -10 -11   1    6.40    2.20
   9  11  -1    1.90    2.10
   9  11  -1    0.50    2.50
   9  11  -1    0.80    4.80
  -9 -11   1    0.70    1.90
  -9 -11   1   -1.10    1.20
  -9 -11   1   -1.40    2.30
   8  11  -1   12.70    7.40
   8  11  -1    0.10    1.90
   8  11  -1    0.50    0.90
   8  11  -1   -2.30    1.70
   8  11  -1    0.00    2.00
  -8 -11   1    4.00    2.90
  -8 -11   1    0.30    1.10
   7  11  -1   34.00    5.00
   7  11  -1   47.60    5.60
   7  11  -1   51.59    5.40
   7  11  -1   50.99    8.90
  -7 -11   1   46.90    4.40
  -7 -11   1   41.20    6.40
  -7 -11   1   50.69    3.70
   6  11  -1    3.30    2.40
   6  11  -1   10.30    3.20
   6  11  -1    7.50    2.70
   6  11  -1   10.70    5.20
  -6 -11   1    5.90    2.70
  -6 -11   1    7.20    1.90
  -6 -11   1    4.80    2.10
   5  11  -1    9.20    2.80
   5  11  -1   11.40    3.20
   5  11  -1   16.20    5.50
  -5 -11   1   15.90    2.20
  -5 -11   1   12.00    2.60
  -5 -11   1    9.00    3.30
   4  11  -1   28.00    4.10
   4  11  -1   25.00    4.10
   4  11  -1   33.50    4.70
   4  11  -1   36.00    6.70
  -4 -11   1   37.00    3.90
  -4 -11   1   26.70    4.60
  -4 -11   1   36.00    2.60
   3  11  -1   24.70    5.10
   3  11  -1   23.00    3.90
   3  11  -1   23.60    3.60
   3  11  -1   24.30    3.80
  -3 -11   1   22.60    5.30
  -3 -11   1   23.50    3.30
  -3 -11   1   27.90    2.10
   2  11  -1    1.20    1.50
   2  11  -1    4.10    2.50
   2  11  -1    3.50    1.70
   2  11  -1    0.60    1.60
  -2 -11   1    5.20    2.30
   1  11  -1   53.49    4.20
   1  11  -1   51.59    4.80
   1  11  -1   57.19    4.60
  -1 -11   1   48.10    4.20
  -1 -11   1   47.30    4.80
  -1 -11   1   50.49    2.70
   0  11  -1   -0.80    1.60
   0  11  -1   -0.50    1.40
   0  11  -1   -0.10    1.20
   0  11  -1    0.00    1.20
   0  11  -1   -1.50    1.00
   0 -11   1    0.00    1.40
   0 -11   1    0.00    1.30
  -1  11  -1    6.60    1.80
  -1  11  -1    4.80    2.40
  -1  11  -1    3.20    1.50
  -1  11  -1    5.50    2.20
   1 -11   1    4.90    2.10
   1 -11   1    4.80    2.00
  -2  11  -1   21.50    3.60
  -2  11  -1   18.80    3.60
  -2  11  -1   21.80    2.80
   2 -11   1   21.90    3.50
   2 -11   1   17.90    3.20
   2 -11   1   16.50    2.60
  -3  11  -1  215.58   10.10
  -3  11  -1  222.08    7.70
  -3  11  -1  224.38    7.80
  -3  11  -1  226.78    9.90
   3 -11   1  225.48    8.20
   3 -11   1  217.68    9.50
   3 -11   1  220.28    9.40
  -4  11  -1  618.64   18.80
  -4  11  -1  646.74   15.70
  -4  11  -1  636.54   15.80
  -4  11  -1  624.54   19.40
   4 -11   1  642.04   18.10
   4 -11   1  636.24   16.60
   4 -11   1  637.94   18.60
  -5  11  -1    5.40    1.60
  -5  11  -1    4.00    1.40
  -5  11  -1    7.60    2.90
  -5  11  -1    2.90    2.00
   5 -11   1    4.30    1.80
   5 -11   1    4.50    2.00
   5 -11   1    2.30    2.00
  -6  11  -1   28.40    4.60
  -6  11  -1   34.50    5.00
  -6  11  -1   31.60    2.90
  -6  11  -1   34.50    3.00
   6 -11   1   31.90    3.60
   6 -11   1   27.90    3.90
   6 -11   1   28.40    4.60
  -7  11  -1   -0.70    1.80
  -7  11  -1    1.10    1.20
  -7  11  -1   -0.10    1.00
  -7  11  -1    0.70    2.00
   7 -11   1    1.60    2.00
   7 -11   1    0.10    1.20
  -8  11  -1   58.19    5.90
  -8  11  -1   58.69    4.10
  -8  11  -1   59.39    6.40
   8 -11   1   65.09    3.60
   8 -11   1   54.99    5.70
   8 -11   1   61.29    5.00
  -9  11  -1    4.60    1.80
  -9  11  -1   10.30    3.40
  -9  11  -1    4.10    2.80
   9 -11   1    6.30    2.80
   9 -11   1    6.30    1.60
   9 -11   1    5.10    2.20
 -10  11  -1    1.20    1.40
 -10  11  -1   -3.90    2.00
  10 -11   1    0.80    2.30
  10 -11   1    1.20    1.60
  10 -11   1   -1.10    1.10
 -11  11  -1    0.90    3.70
 -11  11  -1    3.40    1.90
 -11  11  -1    0.60    2.30
  11 -11   1    3.10    1.50
  11 -11   1    1.70    2.70
  11 -11   1    1.20    1.80
 -12  11  -1    2.10    2.10
 -12  11  -1    9.70    4.40
 -12  11  -1    3.70    3.50
  12 -11   1    3.30    2.10
  12 -11   1    7.30    3.40
  12 -11   1    2.20    1.60
 -13  11  -1    2.80    2.00
 -13  11  -1    5.30    4.80
 -13  11  -1   -6.50    2.50
  13 -11   1    1.50    2.30
  13 -11   1   -5.60    2.40
 -14  11  -1   93.69    6.70
 -14  11  -1   79.69   12.60
 -14  11  -1   90.29    5.00
  14 -11   1   79.89    8.90
  14 -11   1   96.89    6.20
  11  10  -1   -4.50    2.40
 -11 -10   1   -2.20    2.10
 -11 -10   1    0.90    1.50
  10  10  -1    3.30    5.40
  10  10  -1   -0.30    1.90
 -10 -10   1    0.80    1.40
 -10 -10   1    3.80    2.50
 -10 -10   1   -0.40    2.60
   9  10  -1   -1.30    2.00
   9  10  -1   -0.30    5.00
  -9 -10   1   -0.20    1.80
  -9 -10   1   -0.80    1.10
  -9 -10   1    2.90    2.70
   8  10  -1    0.10    0.80
   8  10  -1    0.10    1.70
   8  10  -1    1.20    1.90
   8  10  -1   12.00    4.70
  -8 -10   1   -0.50    1.60
  -8 -10   1   -2.60    1.90
  -8 -10   1    0.20    1.10
   7  10  -1    4.20    3.80
   7  10  -1   -0.60    1.80
   7  10  -1    0.80    1.90
  -7 -10   1   -0.90    1.40
  -7 -10   1    0.00    1.90
  -7 -10   1   -1.00    0.90
   6  10  -1    1.00    3.30
   6  10  -1   -0.60    1.50
   6  10  -1    1.50    1.90
  -6 -10   1    1.80    1.60
  -6 -10   1   -0.20    1.70
  -6 -10   1   -0.50    0.80
   5  10  -1   58.69    5.30
   5  10  -1   73.59    5.90
  -5 -10   1   68.19    6.30
  -5 -10   1   62.49    3.60
  -5 -10   1   69.99    4.80
   4  10  -1  137.69    7.50
   4  10  -1  130.29    7.50
   4  10  -1  135.09    7.60
   4  10  -1  119.09    9.70
  -4 -10   1  136.09    6.70
  -4 -10   1  143.39    8.50
  -4 -10   1  142.19    5.00
   3  10  -1   15.80    3.30
   3  10  -1   12.70    3.00
   3  10  -1   20.80    4.30
   3  10  -1   12.10    4.90
  -3 -10   1   11.50    1.50
  -3 -10   1   12.70    2.40
  -3 -10   1   17.10    3.50
   2  10  -1    4.90    2.00
   2  10  -1    1.70    1.70
   2  10  -1    6.30    3.00
   2  10  -1    6.90    1.90
  -2 -10   1    6.80    2.50
   1  10  -1   17.80    3.00
   1  10  -1   14.60    2.90
   1  10  -1    9.40    2.80
   1  10  -1   19.00    3.00
  -1 -10   1   10.80    2.30
  -1 -10   1   13.90    3.10
   0  10  -1    0.30    1.10
   0  10  -1   -1.20    1.30
   0  10  -1    2.20    1.50
   0  10  -1    1.00    1.20
   0 -10   1    1.80    1.60
   0 -10   1    0.20    1.30
  -1  10  -1   16.10    2.40
  -1  10  -1   19.10    2.70
  -1  10  -1   15.80    3.30
  -1  10  -1   19.00    3.40
   1 -10   1   16.40    2.90
   1 -10   1   18.80    3.10
  -2  10  -1  204.58    8.90
  -2  10  -1  195.58    7.10
  -2  10  -1  194.78    9.10
   2 -10   1  200.18    7.40
   2 -10   1  206.28    8.80
   2 -10   1  197.28    8.50
  -3  10  -1    1.20    1.10
  -3  10  -1    0.80    1.60
  -3  10  -1   -1.50    1.10
  -3  10  -1    0.40    1.00
   3 -10   1    0.50    1.30
   3 -10   1    0.40    1.30
  -4  10  -1  204.48    9.40
  -4  10  -1  209.48    7.10
  -4  10  -1  207.98    9.30
  -4  10  -1  208.68    7.10
   4 -10   1  205.78    9.00
   4 -10   1  201.68    7.80
   4 -10   1  201.18    8.60
  -5  10  -1   66.29    5.60
  -5  10  -1   71.89    4.00
  -5  10  -1   71.79    4.00
  -5  10  -1   63.59    5.40
   5 -10   1   70.69    5.00
   5 -10   1   71.99    4.70
   5 -10   1   84.09    5.80
  -6  10  -1   43.50    3.20
  -6  10  -1   42.10    3.20
  -6  10  -1   40.30    4.80
  -6  10  -1   38.00    4.40
   6 -10   1   41.80    4.60
   6 -10   1   45.70    4.10
  -7  10  -1   14.10    3.70
  -7  10  -1   12.70    3.10
  -7  10  -1   14.70    2.30
   7 -10   1   12.30    2.60
   7 -10   1   10.80    3.00
   7 -10   1   13.40    2.00
  -8  10  -1   30.70    3.00
  -8  10  -1   31.70    5.50
  -8  10  -1   28.60    4.60
   8 -10   1   28.00    4.10
   8 -10   1   29.20    4.70
   8 -10   1   26.40    2.60
  -9  10  -1   11.80    3.40
  -9  10  -1    6.90    3.60
  -9  10  -1   11.00    2.30
   9 -10   1   11.80    2.00
   9 -10   1    9.00    2.20
   9 -10   1   10.40    3.20
 -10  10  -1    6.40    2.90
 -10  10  -1    8.60    2.20
 -10  10  -1    8.90    3.70
  10 -10   1    4.20    2.50
  10 -10   1    5.60    1.70
  10 -10   1    6.80    2.20
 -11  10  -1   23.20    3.50
 -11  10  -1   23.00    4.60
 -11  10  -1   25.20    6.30
  11 -10   1   24.30    5.30
  11 -10   1   26.70    2.90
  11 -10   1   21.30    3.40
 -12  10  -1    4.70    2.90
 -12  10  -1    2.90    4.00
  12 -10   1    5.00    1.90
  12 -10   1    4.90    2.10
 -13  10  -1    2.40    4.60
 -13  10  -1   -0.10    1.30
 -13  10  -1    2.10    1.80
 -13  10  -1   -1.70    2.50
  13 -10   1   -4.30    1.40
  13 -10   1   -3.10    2.30
  13 -10   1   -0.70    2.60
 -14  10  -1   -7.00    5.60
 -14  10  -1    7.00    2.80
 -14  10  -1    1.90    1.50
  14 -10   1    1.90    3.60
  14 -10   1    6.50    2.30
  14 -10   1   -3.10    1.80
  11   9  -1   -0.40    2.30
 -11  -9   1   -2.30    2.20
 -11  -9   1   -2.20    2.00
  10   9  -1    1.80    2.10
  10   9  -1    4.70    5.10
 -10  -9   1    4.70    2.20
 -10  -9   1    0.80    2.90
 -10  -9   1    5.20    2.10
   9   9  -1   10.40    3.20
   9   9  -1   16.70    6.00
  -9  -9   1   10.80    3.80
  -9  -9   1   20.50    3.20
  -9  -9   1   16.40    2.90
   8   9  -1    6.50    1.00
   8   9  -1    4.10    2.10
   8   9  -1    4.60    4.30
   8   9  -1    3.70    2.00
  -8  -9   1    5.70    1.60
  -8  -9   1   11.40    3.60
  -8  -9   1    5.80    2.20
   7   9  -1   23.50    4.40
   7   9  -1   20.90    6.10
   7   9  -1   23.10    3.90
  -7  -9   1   27.80    3.50
  -7  -9   1   24.70    2.60
  -7  -9   1   26.00    5.00
   6   9  -1   24.60    3.90
   6   9  -1   27.60    6.60
   6   9  -1   21.30    3.50
  -6  -9   1   25.60    3.40
  -6  -9   1   30.10    5.00
  -6  -9   1   28.60    2.60
   5   9  -1    0.40    1.40
   5   9  -1   -0.50    1.40
   5   9  -1   -0.40    2.40
  -5  -9   1    0.90    0.90
  -5  -9   1    0.90    1.60
  -5  -9   1    0.40    1.30
   4   9  -1   66.69    5.20
   4   9  -1   83.59    7.70
   4   9  -1   78.19    5.60
  -4  -9   1   72.39    6.10
  -4  -9   1   80.39    3.60
  -4  -9   1   77.29    4.80
   3   9  -1   12.50    2.50
   3   9  -1   15.10    2.90
   3   9  -1   19.40    3.30
   3   9  -1   14.90    3.70
  -3  -9   1   14.60    3.00
  -3  -9   1   15.90    2.50
  -3  -9   1   15.70    1.60
   2   9  -1   68.79    4.90
   2   9  -1   65.49    6.00
   2   9  -1   68.59    4.70
   2   9  -1   66.99    4.50
  -2  -9   1   65.79    5.20
   1   9  -1    2.40    1.30
   1   9  -1    0.70    1.30
   1   9  -1    0.20    1.40
   1   9  -1    1.00    1.20
  -1  -9   1   -0.60    1.00
  -1  -9   1    0.10    1.20
   0   9  -1   -0.80    1.20
   0   9  -1    0.00    0.90
   0   9  -1    2.20    1.60
   0  -9   1    1.00    0.50
   0  -9   1   -0.90    1.10
   0  -9   1   -0.70    0.90
  -1   9  -1   67.09    3.80
  -1   9  -1   68.99    4.80
  -1   9  -1   67.99    5.10
  -1   9  -1   64.89    4.00
   1  -9   1   74.59    5.00
   1  -9   1   68.69    4.00
   1  -9   1   67.39    4.50
  -2   9  -1  161.68    7.70
  -2   9  -1  147.59    7.10
  -2   9  -1  164.48    6.00
   2  -9   1  152.88    6.20
   2  -9   1  151.78    7.10
   2  -9   1  151.48    7.00
  -3   9  -1   43.40    3.00
  -3   9  -1   42.70    2.90
  -3   9  -1   41.80    3.90
  -3   9  -1   41.80    4.00
   3  -9   1   38.60    3.20
   3  -9   1   42.10    3.90
   3  -9   1   36.00    3.50
  -4   9  -1    0.00    1.30
  -4   9  -1    0.00    0.90
  -4   9  -1    0.50    1.20
  -4   9  -1    0.60    1.00
   4  -9   1    0.40    1.10
   4  -9   1   -0.10    1.10
   4  -9   1   -0.10    1.30
  -5   9  -1   61.69    3.40
  -5   9  -1   67.29    3.60
  -5   9  -1   66.19    5.00
  -5   9  -1   62.89    5.10
   5  -9   1   68.69    4.60
   5  -9   1   57.49    4.80
  -6   9  -1   -0.40    0.80
  -6   9  -1    2.00    1.90
  -6   9  -1   -0.60    1.30
   6  -9   1    1.20    1.60
   6  -9   1    0.20    1.20
   6  -9   1    0.20    0.80
  -7   9  -1   36.60    4.10
  -7   9  -1   32.20    2.90
  -7   9  -1   40.10    5.00
   7  -9   1   36.80    2.80
   7  -9   1   37.80    3.60
   7  -9   1   39.90    4.30
  -8   9  -1    2.60    2.50
  -8   9  -1    2.30    1.50
  -8   9  -1    2.20    1.90
   8  -9   1    1.00    1.10
   8  -9   1    2.30    2.00
   8  -9   1    2.80    1.50
  -9   9  -1    8.00    2.10
  -9   9  -1   13.90    3.50
  -9   9  -1   16.30    4.70
   9  -9   1    9.90    3.00
   9  -9   1    8.10    1.80
   9  -9   1   12.90    2.50
 -10   9  -1    0.20    2.00
 -10   9  -1    6.20    4.00
 -10   9  -1    2.80    1.60
  10  -9   1    2.10    1.60
  10  -9   1    5.90    2.80
  10  -9   1    3.20    1.60
 -11   9  -1   11.10    5.00
 -11   9  -1    1.80    1.90
 -11   9  -1    3.50    2.30
  11  -9   1    3.60    2.50
  11  -9   1    5.70    2.00
  11  -9   1    2.10    1.50
 -12   9  -1   21.50    4.20
 -12   9  -1   17.80    3.50
 -12   9  -1   18.00    8.10
  12  -9   1   27.70    5.40
  12  -9   1   19.80    3.70
  12  -9   1   17.10    3.10
 -13   9  -1   15.00    4.00
 -13   9  -1   15.60    2.20
 -13   9  -1   11.90    3.10
 -13   9  -1    8.50    5.70
  13  -9   1   14.30    3.50
  13  -9   1   16.60    3.30
  13  -9   1   10.10    4.20
 -14   9  -1    7.30    2.50
 -14   9  -1    4.90    1.60
 -14   9  -1   10.00    6.10
  14  -9   1    7.40    3.50
  14  -9   1    6.30    2.40
  14  -9   1    0.10    2.70
  12   8  -1   -0.10    2.50
 -12  -8   1    0.30    3.40
 -12  -8   1    0.10    2.30
  11   8  -1   14.80    6.90
  11   8  -1   12.00    3.20
 -11  -8   1   15.30    3.30
 -11  -8   1   11.70    4.30
  10   8  -1   55.89    7.60
  10   8  -1   44.30    9.00
  10   8  -1   48.50    5.20
 -10  -8   1   50.09    7.80
 -10  -8   1   48.30    8.10
   9   8  -1   16.10    3.20
   9   8  -1   18.70    4.80
   9   8  -1   18.00    5.90
  -9  -8   1   18.50    4.50
  -9  -8   1   21.20    3.90
   8   8  -1    0.30    1.90
   8   8  -1    0.80    1.80
   8   8  -1    2.70    3.60
  -8  -8   1    1.20    2.00
  -8  -8   1   -0.30    1.20
   7   8  -1   14.40    5.10
   7   8  -1    9.30    2.60
  -7  -8   1    7.50    2.00
  -7  -8   1   12.30    3.50
   6   8  -1   19.50    3.30
   6   8  -1   19.60    3.90
   6   8  -1   15.60    4.70
  -6  -8   1   18.20    3.90
  -6  -8   1   17.50    2.60
   5   8  -1    1.30    1.70
   5   8  -1    5.20    1.90
   5   8  -1    4.60    3.00
  -5  -8   1    8.70    1.90
  -5  -8   1    5.10    2.30
   4   8  -1  210.48    8.70
   4   8  -1  190.48   11.10
   4   8  -1  219.28    8.70
  -4  -8   1  208.38    9.80
  -4  -8   1  212.08    7.70
  -4  -8   1  213.38    6.20
   3   8  -1   30.80    4.60
   3   8  -1   35.90    3.50
   3   8  -1   36.60    3.50
   3   8  -1   34.10    3.50
  -3  -8   1   33.50    3.10
  -3  -8   1   33.70    2.10
  -3  -8   1   37.60    4.00
   2   8  -1   -0.30    1.50
   2   8  -1    0.40    1.00
   2   8  -1    1.60    1.30
   2   8  -1    0.10    0.90
  -2  -8   1    0.20    1.10
  -2  -8   1   -0.20    0.50
   1   8  -1   67.79    5.20
   1   8  -1   66.29    4.20
   1   8  -1   62.49    4.70
   1   8  -1   70.49    3.90
  -1  -8   1   70.59    4.80
  -1  -8   1   63.99    4.10
   0   8  -1    0.40    1.00
   0   8  -1    0.00    0.80
   0   8  -1    0.20    1.20
   0   8  -1   -1.30    0.70
   0  -8   1   -0.70    0.40
   0  -8   1    0.50    1.10
   0  -8   1   -0.50    0.80
  -1   8  -1  122.49    5.00
  -1   8  -1  129.89    6.50
  -1   8  -1  129.99    6.20
  -1   8  -1  128.09    5.40
   1  -8   1  124.69    5.80
   1  -8   1  127.69    5.30
   1  -8   1  126.89    6.20
  -2   8  -1  521.25   14.90
  -2   8  -1  510.85   12.40
  -2   8  -1  511.35   14.40
   2  -8   1  524.35   14.20
   2  -8   1  523.55   14.30
   2  -8   1  518.45   13.10
  -3   8  -1   97.69    5.60
  -3   8  -1   97.39    4.10
  -3   8  -1   91.19    6.60
  -3   8  -1   96.29    4.10
   3  -8   1   86.59    4.50
   3  -8   1   90.69    5.20
   3  -8   1   94.49    5.10
  -4   8  -1  271.97    9.80
  -4   8  -1  264.37    7.60
  -4   8  -1  256.77    9.80
   4  -8   1  267.07    7.30
   4  -8   1  261.97    9.70
   4  -8   1  265.27    9.10
   4  -8   1  265.47    8.70
  -5   8  -1  168.18    5.70
  -5   8  -1  165.18    5.60
  -5   8  -1  176.18    8.20
  -5   8  -1  172.88    7.70
   5  -8   1  168.68    7.70
   5  -8   1  167.98    5.60
   5  -8   1  164.58    6.90
  -6   8  -1   46.70    3.10
  -6   8  -1   42.00    4.10
  -6   8  -1   41.50    4.50
  -6   8  -1   43.60    2.80
   6  -8   1   48.60    3.80
   6  -8   1   45.00    4.30
   6  -8   1   47.60    3.00
  -7   8  -1   12.00    2.10
  -7   8  -1   10.30    3.30
  -7   8  -1    9.30    2.50
   7  -8   1    9.60    2.10
   7  -8   1   11.10    2.70
   7  -8   1   13.30    2.10
  -8   8  -1   20.30    3.50
  -8   8  -1   20.70    4.50
  -8   8  -1   20.70    2.90
   8  -8   1   20.60    2.40
   8  -8   1   19.40    2.90
   8  -8   1   21.30    3.80
  -9   8  -1    0.50    2.40
  -9   8  -1    1.30    1.80
  -9   8  -1   -0.10    1.20
   9  -8   1    2.30    1.50
   9  -8   1    2.80    1.10
   9  -8   1    1.50    1.80
   9  -8   1    0.40    1.30
 -10   8  -1   25.50    3.60
 -10   8  -1   23.40    6.00
 -10   8  -1   34.00    5.00
  10  -8   1   32.60    5.00
  10  -8   1   23.90    3.50
  10  -8   1   26.00    3.20
  10  -8   1   22.40    2.20
 -11   8  -1   37.60    5.40
 -11   8  -1   36.90    7.60
 -11   8  -1   38.10    4.00
  11  -8   1   41.60    4.00
  11  -8   1   43.80    2.90
  11  -8   1   38.10    5.80
 -12   8  -1    4.70    4.60
 -12   8  -1    7.00    1.50
 -12   8  -1    9.70    2.60
 -12   8  -1    7.30    2.90
  12  -8   1    4.70    2.90
  12  -8   1    6.70    1.50
  12  -8   1   11.30    2.60
 -13   8  -1    2.70    4.50
 -13   8  -1    4.70    2.40
 -13   8  -1    8.00    5.80
 -13   8  -1    8.60    1.60
  13  -8   1    5.40    2.10
  13  -8   1    9.60    1.80
  13  -8   1    5.00    2.70
  13  -8   1    8.00    3.70
 -14   8  -1   23.00    4.60
 -14   8  -1   18.50    2.20
 -14   8  -1   21.10    7.60
 -14   8  -1   19.40    4.00
  14  -8   1   21.20    3.60
  14  -8   1   27.00    5.40
  14  -8   1   18.90    2.20
  14  -8   1   20.10    4.40
 -15   8  -1    2.10    1.20
 -15   8  -1    3.60    2.90
 -15   8  -1   -2.20    5.50
  15  -8   1   -2.80    1.30
  15  -8   1    4.90    2.90
  13   7  -1   13.00    3.70
 -13  -7   1   17.50    8.90
  12   7  -1    1.10    2.10
  12   7  -1   -0.10    5.60
 -12  -7   1    4.00    2.30
 -12  -7   1    4.00    4.60
  11   7  -1   13.30    6.30
  11   7  -1   22.60    4.10
 -11  -7   1   14.40    2.90
 -11  -7   1   17.70    5.30
  10   7  -1    1.30    4.10
  10   7  -1   -2.50    1.60
  10   7  -1    0.60    2.00
 -10  -7   1    6.30    3.30
 -10  -7   1    2.40    1.80
   9   7  -1    0.00    1.60
   9   7  -1    2.80    1.70
   9   7  -1   -1.40    4.30
  -9  -7   1    1.30    1.80
  -9  -7   1    1.40    1.50
  -9  -7   1    0.50    2.30
   8   7  -1   25.20    3.70
  -8  -7   1   30.00    3.40
  -8  -7   1   31.30    5.60
  -8  -7   1   26.00    3.80
   7   7  -1    2.20    3.20
   7   7  -1    1.40    1.60
   7   7  -1    3.50    1.70
  -7  -7   1    0.10    1.10
  -7  -7   1    0.20    1.80
  -7  -7   1   -0.40    1.30
   6   7  -1    0.40    2.70
   6   7  -1    0.00    1.20
   6   7  -1   -0.70    1.00
  -6  -7   1   -1.10    1.50
  -6  -7   1   -0.10    1.10
  -6  -7   1   -1.10    1.10
   5   7  -1    0.20    1.00
   5   7  -1    0.10    1.10
   5   7  -1    1.70    2.40
  -5  -7   1    0.90    1.60
  -5  -7   1    1.00    1.10
   4   7  -1   57.49    4.10
   4   7  -1   58.39    4.30
   4   7  -1   54.89    5.90
  -4  -7   1   59.69    3.70
  -4  -7   1   54.69    4.80
   3   7  -1   -0.20    0.90
   3   7  -1   -1.90    1.10
   3   7  -1   -1.20    0.70
  -3  -7   1    1.20    1.30
  -3  -7   1    0.30    0.90
   2   7  -1   32.00    3.00
   2   7  -1   32.60    2.90
   2   7  -1   33.20    3.90
   2   7  -1   30.60    3.00
  -2  -7   1   33.90    1.70
  -2  -7   1   32.70    3.40
   1   7  -1  105.09    6.00
   1   7  -1  104.59    5.20
   1   7  -1  114.39    4.70
   1   7  -1  103.99    5.00
  -1  -7   1  110.39    5.70
  -1  -7   1  102.09    4.80
   0   7  -1   79.79    4.40
   0   7  -1   77.89    3.60
   0   7  -1   66.89    3.90
   0   7  -1   77.19    4.90
   0  -7   1   81.89    4.50
   0  -7   1   75.99    4.60
  -1   7  -1  233.98    6.90
  -1   7  -1  232.18    8.50
  -1   7  -1  234.48    7.40
  -1   7  -1  230.48    8.20
   1  -7   1  239.28    7.40
   1  -7   1  230.58    8.20
   1  -7   1  236.18    8.00
  -2   7  -1   14.00    2.30
  -2   7  -1   13.70    1.80
  -2   7  -1   13.10    2.30
   2  -7   1   12.70    2.30
   2  -7   1   15.50    2.10
   2  -7   1   14.30    2.40
  -3   7  -1   32.20    3.10
  -3   7  -1   32.00    2.20
  -3   7  -1   36.50    3.30
  -3   7  -1   35.00    2.40
  -3   7  -1   33.50    2.30
   3  -7   1   33.40    3.00
   3  -7   1   31.60    2.70
   3  -7   1   30.70    3.10
  -4   7  -1  177.88    7.50
  -4   7  -1  171.58    5.40
  -4   7  -1  167.58    5.40
  -4   7  -1  174.98    7.20
   4  -7   1  179.38    5.50
   4  -7   1  162.18    7.00
   4  -7   1  166.68    6.50
  -5   7  -1   19.90    2.90
  -5   7  -1   16.40    2.90
  -5   7  -1   20.90    1.90
   5  -7   1   18.40    1.90
   5  -7   1   16.50    2.70
   5  -7   1   21.40    2.50
  -6   7  -1    2.90    1.20
  -6   7  -1    2.90    2.00
  -6   7  -1    3.10    1.70
   6  -7   1    2.50    1.10
   6  -7   1    1.30    1.20
   6  -7   1    1.20    1.50
  -7   7  -1    3.60    1.40
  -7   7  -1    2.80    2.40
  -7   7  -1    4.30    1.90
   7  -7   1    4.90    1.50
   7  -7   1    5.80    1.60
   7  -7   1    2.60    1.00
   7  -7   1    3.20    1.80
  -8   7  -1    1.30    2.50
  -8   7  -1    1.70    1.40
  -8   7  -1    5.10    2.00
   8  -7   1    5.10    2.40
   8  -7   1    4.50    1.50
   8  -7   1    2.50    1.40
   8  -7   1    4.80    1.20
  -9   7  -1    3.10    3.00
  -9   7  -1    6.20    2.70
  -9   7  -1    6.30    2.00
   9  -7   1    6.10    2.10
   9  -7   1    3.10    1.50
   9  -7   1    5.20    2.40
   9  -7   1    3.50    1.20
 -10   7  -1    1.80    1.70
 -10   7  -1    0.80    2.70
 -10   7  -1    2.20    1.80
  10  -7   1    1.40    2.00
  10  -7   1    1.40    1.40
  10  -7   1    0.70    1.40
  10  -7   1    0.80    1.10
 -11   7  -1   31.60    7.10
 -11   7  -1   31.10    4.50
 -11   7  -1   37.70    4.60
  11  -7   1   28.70    2.60
  11  -7   1   22.10    4.40
  11  -7   1   30.60    4.10
  11  -7   1   35.20    3.60
 -12   7  -1   11.00    1.70
 -12   7  -1   13.30    3.40
 -12   7  -1    8.60    4.80
 -12   7  -1   11.10    3.00
  12  -7   1   13.20    2.00
  12  -7   1   18.30    4.30
  12  -7   1    7.20    2.60
  12  -7   1   12.00    2.60
 -13   7  -1    1.50    1.10
 -13   7  -1   -2.80    3.90
 -13   7  -1    0.20    2.00
 -13   7  -1   -2.10    2.20
  13  -7   1    2.10    1.30
  13  -7   1   -1.70    2.30
  13  -7   1   -0.40    1.50
 -14   7  -1    1.40    1.00
 -14   7  -1   -1.20    2.30
 -14   7  -1    5.90    2.50
  14  -7   1    1.00    3.20
  14  -7   1   -5.20    2.00
  14  -7   1    0.10    2.90
  14  -7   1   -2.50    1.10
 -15   7  -1    1.50    4.70
 -15   7  -1    5.80    6.20
 -15   7  -1    4.60    1.20
  15  -7   1    5.20    3.50
  15  -7   1    4.50    4.40
  15  -7   1    0.40    1.60
  15  -7   1    2.70    2.20
 -13  -6   1   21.60    4.00
 -13  -6   1   12.40    4.40
  12   6  -1   25.70    7.50
  12   6  -1   14.20    3.30
 -12  -6   1   22.70    3.80
 -12  -6   1   15.40    4.30
 -12  -6   1    8.60    4.20
  11   6  -1   32.70    7.40
  11   6  -1   22.20    4.00
  11   6  -1   21.80    4.30
 -11  -6   1   29.90    6.40
 -11  -6   1   27.80    5.50
 -11  -6   1   24.30    4.60
  10   6  -1   83.19    6.00
  10   6  -1   69.19   10.70
  10   6  -1   82.89    7.40
 -10  -6   1   60.09    5.80
 -10  -6   1   70.39    8.00
 -10  -6   1   62.59    6.40
   9   6  -1    6.20    2.20
   9   6  -1    3.90    3.90
  -9  -6   1    5.70    1.90
  -9  -6   1    4.40    2.10
  -9  -6   1    5.40    2.80
   8   6  -1   -0.20    0.80
   8   6  -1    1.20    3.30
  -8  -6   1   -0.70    1.20
  -8  -6   1   -1.30    1.20
  -8  -6   1   -0.10    1.90
   7   6  -1    0.90    2.70
   7   6  -1    1.70    1.50
  -7  -6   1    1.10    1.20
  -7  -6   1    1.40    1.60
  -7  -6   1    3.60    2.30
   6   6  -1  120.39    7.00
   6   6  -1  118.99    6.10
   6   6  -1  111.39    9.20
  -6  -6   1  124.09    6.40
  -6  -6   1  120.29    5.40
  -6  -6   1  111.89    7.70
   5   6  -1  585.54   15.40
   5   6  -1  570.74   16.20
   5   6  -1  579.54   20.70
  -5  -6   1  585.94   15.70
  -5  -6   1  590.64   14.30
  -5  -6   1  578.14   18.00
   4   6  -1   14.60    3.60
   4   6  -1   12.60    2.20
   4   6  -1    9.50    2.00
  -4  -6   1    9.30    1.90
  -4  -6   1   10.90    2.70
  -4  -6   1   12.30    1.90
   3   6  -1   81.99    6.00
   3   6  -1   81.09    4.40
   3   6  -1   87.49    4.60
  -3  -6   1   80.49    5.20
  -3  -6   1   87.09    4.10
   2   6  -1   20.70    2.40
   2   6  -1   24.50    2.40
   2   6  -1   16.30    3.00
   2   6  -1   20.00    2.40
  -2  -6   1   21.50    3.00
   1   6  -1  387.06    9.90
   1   6  -1  385.36   10.60
   1   6  -1  373.46   11.70
   1   6  -1  385.66   10.50
  -1  -6   1  388.96   11.20
  -1  -6   1  394.06   10.30
   0   6  -1    9.60    1.50
   0   6  -1    5.70    1.80
   0   6  -1    7.00    1.50
   0  -6   1    7.70    1.70
   0  -6   1    6.20    1.50
  -1   6  -1  585.04   14.60
  -1   6  -1  568.74   12.80
  -1   6  -1  560.04   14.00
   1  -6   1  565.94   14.10
   1  -6   1  571.34   13.30
   1  -6   1  575.04   13.90
  -2   6  -1  101.89    3.80
  -2   6  -1  102.59    4.90
  -2   6  -1  104.49    3.90
  -2   6  -1   99.39    4.70
   2  -6   1  100.89    4.80
   2  -6   1   96.09    4.60
   2  -6   1  106.19    4.40
  -3   6  -1  437.66   11.90
  -3   6  -1  439.16    9.90
  -3   6  -1  427.86   10.10
  -3   6  -1  433.26   12.00
   3  -6   1  436.66   10.80
   3  -6   1  423.46   11.80
   3  -6   1  436.76   11.40
  -4   6  -1  971.00   22.10
  -4   6  -1  957.60   19.90
  -4   6  -1  978.00   22.90
  -4   6  -1  962.50   19.80
   4  -6   1  976.20   20.00
   4  -6   1  976.10   21.40
   4  -6   1 1055.59   25.20
  -5   6  -1   33.50    3.20
  -5   6  -1   33.90    2.40
  -5   6  -1   30.50    3.70
   5  -6   1   29.70    3.20
   5  -6   1   33.00    2.30
   5  -6   1   34.30    2.80
   5  -6   1   32.30    2.00
  -6   6  -1    0.50    1.20
  -6   6  -1   -0.50    1.50
  -6   6  -1    1.20    1.00
   6  -6   1    0.40    0.70
   6  -6   1   -1.20    0.70
   6  -6   1   -1.50    1.00
   6  -6   1    0.50    0.90
  -7   6  -1   57.39    3.70
  -7   6  -1   55.79    5.80
  -7   6  -1   51.79    4.10
   7  -6   1   55.19    3.70
   7  -6   1   56.69    3.60
   7  -6   1   50.79    4.60
   7  -6   1   57.09    2.90
  -8   6  -1   33.50    3.20
  -8   6  -1   38.60    3.80
  -8   6  -1   29.60    5.30
   8  -6   1   39.30    3.40
   8  -6   1   37.90    2.50
   8  -6   1   39.20    3.20
   8  -6   1   34.90    4.30
  -9   6  -1    9.10    3.80
  -9   6  -1    7.30    2.00
  -9   6  -1    7.30    2.30
   9  -6   1    7.50    1.90
   9  -6   1    5.50    2.50
   9  -6   1   12.10    2.60
   9  -6   1    7.30    1.40
 -10   6  -1    2.50    1.70
 -10   6  -1    2.90    3.30
 -10   6  -1    0.50    1.50
  10  -6   1    2.50    2.10
  10  -6   1   -0.30    1.00
  10  -6   1    0.50    1.30
  10  -6   1   -0.10    1.40
 -11   6  -1    6.80    4.50
 -11   6  -1   15.90    3.50
 -11   6  -1   11.60    1.60
 -11   6  -1   12.50    2.90
  11  -6   1   14.20    2.70
  11  -6   1   16.50    2.20
  11  -6   1   17.60    3.30
  11  -6   1   13.50    3.80
 -12   6  -1   33.20    8.20
 -12   6  -1   38.20    2.40
 -12   6  -1   36.50    4.40
 -12   6  -1   44.20    5.60
  12  -6   1   32.60    2.90
  12  -6   1   42.00    4.80
  12  -6   1   39.50    6.10
  12  -6   1   35.40    3.80
 -13   6  -1   28.30    2.20
 -13   6  -1   24.00    4.30
 -13   6  -1   16.60    6.30
 -13   6  -1   24.40    4.60
  13  -6   1   32.30    6.10
  13  -6   1   21.10    3.50
  13  -6   1   22.60    2.70
  13  -6   1   22.10    4.10
 -14   6  -1    4.20    2.40
 -14   6  -1    2.70    4.80
 -14   6  -1   -2.50    1.90
 -14   6  -1    0.70    0.90
  14  -6   1    4.40    2.90
  14  -6   1    2.60    2.00
  14  -6   1    2.40    1.50
  14  -6   1    0.70    3.10
 -15   6  -1   21.40    7.80
 -15   6  -1    2.80    2.90
  15  -6   1   15.20    4.50
  15  -6   1   10.00    3.00
  15  -6   1   13.50    4.80
  13   5  -1    6.30    2.80
  13   5  -1    4.00    5.60
 -13  -5   1    6.00    1.40
 -13  -5   1    7.20    2.90
  12   5  -1   24.80    6.80
  12   5  -1   29.20    4.50
 -12  -5   1   17.10    4.40
 -12  -5   1   22.30    3.70
 -12  -5   1   21.00    2.00
 -12  -5   1   12.70    4.60
  11   5  -1   36.30    5.90
  11   5  -1   32.40    7.40
 -11  -5   1   30.00    2.10
 -11  -5   1   25.20    4.30
 -11  -5   1   30.50    3.90
 -11  -5   1   19.00    5.20
  10   5  -1   54.09    4.70
  10   5  -1   51.19    8.90
 -10  -5   1   47.50    4.10
 -10  -5   1   46.60    2.40
 -10  -5   1   60.99    7.50
 -10  -5   1   46.80    5.00
   9   5  -1    2.20    3.40
   9   5  -1    1.10    1.50
  -9  -5   1    0.70    1.40
  -9  -5   1    0.70    1.50
  -9  -5   1    2.50    0.90
  -9  -5   1    3.50    3.60
   8   5  -1   33.60    6.70
   8   5  -1   37.80    3.60
  -8  -5   1   27.00    4.00
  -8  -5   1   32.60    5.50
  -8  -5   1   33.40    3.20
  -8  -5   1   35.00    1.80
   7   5  -1   29.20    6.00
   7   5  -1   25.90    3.10
   7   5  -1   26.00    3.80
  -7  -5   1   29.30    3.40
  -7  -5   1   21.00    4.20
  -7  -5   1   26.60    2.80
   6   5  -1    0.70    1.50
   6   5  -1   -0.20    2.30
   6   5  -1   -0.30    1.00
  -6  -5   1   -0.20    1.70
  -6  -5   1    1.00    1.20
  -6  -5   1   -0.20    0.80
   5   5  -1    8.00    3.00
   5   5  -1    9.90    2.30
  -5  -5   1    7.70    2.40
  -5  -5   1   11.00    1.80
  -5  -5   1   11.40    2.20
   4   5  -1    8.00    2.80
   4   5  -1   10.20    2.30
   4   5  -1    9.70    1.90
  -4  -5   1    8.50    1.50
  -4  -5   1   15.40    2.40
  -4  -5   1    7.60    2.30
   3   5  -1  338.67   12.30
   3   5  -1  354.46    9.90
   3   5  -1  342.57    9.50
  -3  -5   1  354.06   11.30
  -3  -5   1  325.77   10.10
  -3  -5   1  337.27    9.60
   2   5  -1   84.29    4.00
   2   5  -1   81.79    5.10
   2   5  -1   90.99    4.10
  -2  -5   1   85.89    3.70
  -2  -5   1   85.39    4.70
   1   5  -1  427.96   10.10
   1   5  -1  418.76   10.60
   1   5  -1  416.16   11.70
   1   5  -1  435.16   10.80
  -1  -5   1  414.76   11.20
  -1  -5   1  413.36   10.30
   0   5  -1  141.59    4.30
   0   5  -1  145.39    5.60
   0   5  -1  137.99    5.00
   0  -5   1  142.09    5.50
   0  -5   1  142.29    5.10
  -1   5  -1   85.49    4.00
  -1   5  -1   81.19    4.00
  -1   5  -1   79.89    3.20
   1  -5   1   85.79    3.90
   1  -5   1   85.39    3.70
   1  -5   1   73.09    3.80
  -2   5  -1   71.39    3.70
  -2   5  -1   71.69    2.90
  -2   5  -1   70.69    3.00
  -2   5  -1   69.29    3.70
   2  -5   1   67.99    3.60
   2  -5   1   75.49    2.90
   2  -5   1   73.19    3.60
  -3   5  -1   49.70    2.30
  -3   5  -1   50.29    3.50
  -3   5  -1   44.00    3.10
  -3   5  -1   47.10    2.40
   3  -5   1   45.20    2.90
   3  -5   1   48.20    2.50
   3  -5   1   46.60    3.20
  -4   5  -1  537.75   13.80
  -4   5  -1  582.84   12.50
  -4   5  -1  580.14   12.20
  -4   5  -1  573.54   15.20
   4  -5   1  585.34   12.60
   4  -5   1  551.84   12.40
   4  -5   1  553.44   14.40
   4  -5   1  587.44   13.60
   4  -5   1  565.04   12.00
  -5   5  -1    0.40    0.80
  -5   5  -1   -0.20    1.30
  -5   5  -1    2.00    1.20
   5  -5   1    1.60    0.70
   5  -5   1    2.30    1.40
   5  -5   1    1.10    0.90
   5  -5   1    0.50    0.90
  -6   5  -1    4.50    2.40
  -6   5  -1    5.10    1.40
  -6   5  -1    3.00    1.30
   6  -5   1    3.60    1.20
   6  -5   1    4.10    1.80
   6  -5   1    4.50    1.00
   6  -5   1    3.60    1.30
  -7   5  -1  182.98    6.70
  -7   5  -1  188.18    7.50
  -7   5  -1  193.98   10.60
   7  -5   1  195.78    6.80
   7  -5   1  186.88    5.70
   7  -5   1  187.18    8.50
   7  -5   1  180.88    6.80
  -8   5  -1    8.70    3.80
  -8   5  -1    3.40    1.60
  -8   5  -1    7.50    2.00
   8  -5   1    5.70    1.30
   8  -5   1    5.40    1.80
   8  -5   1    8.30    1.90
   8  -5   1    8.20    2.60
  -9   5  -1   13.50    2.50
  -9   5  -1    9.80    4.40
  -9   5  -1    9.40    2.50
   9  -5   1   11.70    2.10
   9  -5   1   10.20    2.20
   9  -5   1   13.00    1.80
   9  -5   1   10.10    3.00
 -10   5  -1   74.89    5.20
 -10   5  -1   81.79    9.50
 -10   5  -1   77.39    5.60
 -10   5  -1   78.59    3.20
  10  -5   1   82.19    4.90
  10  -5   1   72.09    5.20
  10  -5   1   70.69    6.60
  10  -5   1   81.69    4.00
 -11   5  -1    5.70    2.50
 -11   5  -1    6.90    1.30
 -11   5  -1    7.20    4.70
 -11   5  -1   10.00    2.80
  11  -5   1    9.00    1.80
  11  -5   1    9.80    3.40
  11  -5   1    7.00    2.00
  11  -5   1    9.30    2.60
 -12   5  -1   28.00    2.00
 -12   5  -1   30.00    7.20
 -12   5  -1   30.40    4.60
 -12   5  -1   34.70    4.70
  12  -5   1   30.40    3.60
  12  -5   1   28.90    4.30
  12  -5   1   28.00    2.90
  12  -5   1   32.90    5.80
 -13   5  -1    3.20    4.40
 -13   5  -1    1.00    2.00
 -13   5  -1    1.50    2.30
  13  -5   1    1.60    2.70
  13  -5   1   -1.00    1.90
  13  -5   1   -0.90    1.40
  13  -5   1    1.90    1.40
 -14   5  -1  101.59    7.40
 -14   5  -1  118.89   14.10
 -14   5  -1  104.59    7.90
  14  -5   1  114.69   10.10
  14  -5   1  120.19    8.50
  14  -5   1  109.29    6.90
 -15   5  -1    3.50    2.60
 -15   5  -1   11.30    7.00
  15  -5   1    5.00    2.40
  15  -5   1   12.00    7.50
  15  -5   1   11.80    2.50
  14   4  -1   14.20    3.50
 -14  -4   1   20.40    6.00
 -14  -4   1   19.20    2.30
 -14  -4   1   12.10    5.30
  13   4  -1    0.80    4.30
  13   4  -1   -0.30    1.80
 -13  -4   1   -0.90    2.50
 -13  -4   1   -1.50    3.50
 -13  -4   1    0.40    2.00
 -13  -4   1    1.80    1.20
  12   4  -1  135.29   13.00
  12   4  -1  138.69    9.60
  12   4  -1  150.88    8.20
 -12  -4   1  143.49    5.20
 -12  -4   1  140.89    7.70
 -12  -4   1  143.29    9.90
 -12  -4   1  142.49   12.10
  11   4  -1   39.80    4.20
  11   4  -1   28.80    6.90
  11   4  -1   34.90    6.00
 -11  -4   1   30.80    3.70
 -11  -4   1   29.80    6.20
 -11  -4   1   31.40    2.40
 -11  -4   1   27.00    4.40
  10   4  -1   17.70    3.00
  10   4  -1   23.60    4.00
 -10  -4   1   24.70    2.00
 -10  -4   1   27.60    5.80
 -10  -4   1   14.90    3.40
 -10  -4   1   17.60    2.90
   9   4  -1   -0.30    0.70
   9   4  -1   -0.20    1.30
   9   4  -1   -1.50    2.70
  -9  -4   1   -1.10    1.10
  -9  -4   1    1.00    0.70
  -9  -4   1   -0.30    1.40
  -9  -4   1    4.70    3.10
   8   4  -1    6.60    1.90
   8   4  -1    7.30    2.50
   8   4  -1    7.50    3.90
  -8  -4   1    3.60    1.40
  -8  -4   1   10.30    3.80
  -8  -4   1    5.80    1.60
  -8  -4   1    7.10    2.30
   7   4  -1   11.70    2.10
   7   4  -1   11.60    2.70
   7   4  -1   12.60    4.10
  -7  -4   1   14.40    3.00
  -7  -4   1   10.90    1.90
  -7  -4   1   14.80    3.70
   6   4  -1  120.79    5.30
   6   4  -1  110.49    5.90
   6   4  -1   97.89    8.30
  -6  -4   1  115.59    3.10
  -6  -4   1  118.59    4.90
  -6  -4   1  131.29    8.10
  -6  -4   1  117.89    5.90
   5   4  -1  101.79    7.70
   5   4  -1  102.79    5.40
   5   4  -1  104.09    4.60
  -5  -4   1  108.99    4.40
  -5  -4   1   94.09    6.50
  -5  -4   1  105.69    5.20
  -5  -4   1  100.29    2.50
   4   4  -1    5.80    1.80
   4   4  -1    4.30    2.50
   4   4  -1    5.50    1.40
  -4  -4   1    5.40    1.30
  -4  -4   1    7.90    1.80
  -4  -4   1    4.90    1.90
   3   4  -1   48.30    4.40
   3   4  -1   52.69    3.00
  -3  -4   1   55.59    3.20
  -3  -4   1   52.29    2.70
  -3  -4   1   52.59    4.10
   2   4  -1  148.69    5.10
   2   4  -1  158.48    5.30
   2   4  -1  163.88    6.70
  -2  -4   1  152.08    4.80
  -2  -4   1  146.79    7.20
   1   4  -1   92.59    4.40
   1   4  -1   90.79    3.80
   1   4  -1   95.09    3.50
   1   4  -1   95.39    3.80
  -1  -4   1   96.69    4.20
  -1  -4   1   96.89    3.60
   0   4  -1 2059.49   37.90
   0   4  -1 2029.00   40.20
   0   4  -1 1916.31   37.80
   0  -4   1 2072.49   37.90
   0  -4   1 1988.60   37.80
   0  -4   1 2009.10   38.30
  -1   4  -1 9999.00  194.48
  -1   4  -1 9645.44  193.88
   1  -4   1 9694.23  193.88
   1  -4   1 9773.12  194.48
  -2   4  -1 1322.47   24.70
  -2   4  -1 1312.97   26.30
  -2   4  -1 1328.67   26.60
  -2   4  -1 1355.66   25.10
   2  -4   1 1347.97   25.30
   2  -4   1 1304.37   26.00
   2  -4   1 1335.47   26.50
  -3   4  -1    1.00    1.00
  -3   4  -1    4.70    0.90
  -3   4  -1    3.00    0.80
  -3   4  -1    2.10    1.10
   3  -4   1    1.70    0.90
   3  -4   1    2.50    1.20
   3  -4   1    1.90    0.70
   3  -4   1    2.60    0.80
  -4   4  -1    7.10    2.00
  -4   4  -1    7.50    1.60
  -4   4  -1    8.00    1.30
   4  -4   1    6.60    1.30
   4  -4   1    8.10    1.30
   4  -4   1    8.80    1.40
   4  -4   1    9.00    1.80
  -5   4  -1    1.50    1.90
  -5   4  -1    0.80    1.00
   5  -4   1    1.70    1.00
   5  -4   1    0.10    0.80
   5  -4   1    0.80    1.20
  -6   4  -1   63.89    3.50
  -6   4  -1   57.49    3.70
  -6   4  -1   75.69    6.20
   6  -4   1   63.49    3.40
   6  -4   1   59.59    3.50
   6  -4   1   61.39    2.80
   6  -4   1   66.79    4.80
  -7   4  -1   34.50    3.10
  -7   4  -1   31.90    2.90
  -7   4  -1   33.20    5.30
   7  -4   1   36.00    2.80
   7  -4   1   35.10    3.00
   7  -4   1   32.90    3.80
   7  -4   1   35.30    2.30
  -8   4  -1    2.90    3.10
  -8   4  -1    4.50    1.60
  -8   4  -1    1.50    1.30
   8  -4   1    2.00    1.40
   8  -4   1    1.80    1.10
   8  -4   1    2.90    2.00
  -9   4  -1   -1.40    1.00
  -9   4  -1    0.20    0.70
  -9   4  -1    1.50    3.30
   9  -4   1   -0.40    1.00
   9  -4   1   -1.60    1.70
 -10   4  -1   48.00    4.60
 -10   4  -1   47.60    2.30
 -10   4  -1   49.10    4.40
 -10   4  -1   48.90    8.30
  10  -4   1   49.60    3.80
  10  -4   1   51.09    5.00
  10  -4   1   49.10    5.80
 -11   4  -1   22.10    1.70
 -11   4  -1   24.00    6.50
 -11   4  -1   20.70    3.70
  11  -4   1   22.60    4.40
  11  -4   1   24.40    3.30
  11  -4   1   22.80    4.60
 -12   4  -1   11.60    3.00
 -12   4  -1    9.20    4.60
 -12   4  -1   11.50    3.00
  12  -4   1   11.50    3.20
  12  -4   1   11.40    2.40
  12  -4   1   13.80    4.00
 -13   4  -1   -4.30    3.20
 -13   4  -1   -0.50    2.00
 -13   4  -1    1.30    2.20
  13  -4   1    2.00    1.60
  13  -4   1    1.10    2.00
  13  -4   1   -1.90    2.90
  13  -4   1    0.80    1.60
 -14   4  -1   47.60    9.10
 -14   4  -1   60.19    6.10
 -14   4  -1   64.69    6.40
  14  -4   1   54.09    6.20
  14  -4   1   58.99    5.20
  14  -4   1   65.79    7.90
  14  -4   1   70.29    4.50
 -15   4  -1    6.10    6.00
 -15   4  -1   15.40    3.80
  15  -4   1   11.80    3.00
  15  -4   1   17.10    2.90
  14   3  -1    7.60    4.60
  14   3  -1    1.80    2.20
 -14  -3   1    2.40    1.60
 -14  -3   1    5.70    4.80
 -14  -3   1    4.80    2.40
  13   3  -1   -0.10    1.70
  13   3  -1   -3.30    3.80
 -13  -3   1    2.40    1.30
 -13  -3   1    3.70    2.10
 -13  -3   1    2.40    4.00
 -13  -3   1    0.80    2.00
  12   3  -1    3.80    2.50
  12   3  -1   17.30    5.50
  12   3  -1    7.00    2.60
 -12  -3   1    5.50    2.90
 -12  -3   1    8.90    1.70
 -12  -3   1    2.70    3.30
 -12  -3   1   10.40    3.60
  11   3  -1   -0.50    1.30
  11   3  -1   -0.50    1.80
  11   3  -1    6.00    4.20
 -11  -3   1    0.90    2.50
 -11  -3   1    2.10    1.90
 -11  -3   1   -1.40    2.70
  10   3  -1    8.90    2.30
  10   3  -1    5.50    4.10
  10   3  -1    9.80    2.90
 -10  -3   1    9.60    2.50
 -10  -3   1   11.90    4.30
 -10  -3   1   12.20    2.40
   9   3  -1   10.70    4.10
   9   3  -1   10.20    2.80
   9   3  -1   14.70    2.50
  -9  -3   1   12.20    4.10
  -9  -3   1   11.90    2.30
  -9  -3   1    9.30    2.50
   8   3  -1  153.98    6.60
   8   3  -1  158.98    8.00
   8   3  -1  155.78   11.30
  -8  -3   1  157.18    7.60
  -8  -3   1  174.48   10.90
  -8  -3   1  162.68    6.40
   7   3  -1   62.99    3.80
   7   3  -1   51.99    6.60
   7   3  -1   62.49    4.70
  -7  -3   1   60.89    6.30
  -7  -3   1   62.19    4.60
  -7  -3   1   62.29    3.70
   6   3  -1   38.90    3.70
   6   3  -1   38.70    6.00
   6   3  -1   38.50    2.90
  -6  -3   1   41.70    3.60
  -6  -3   1   48.80    5.20
  -6  -3   1   44.70    2.80
   5   3  -1  741.53   16.60
   5   3  -1  758.22   18.10
   5   3  -1  736.43   22.60
  -5  -3   1  778.92   21.50
  -5  -3   1  762.32   18.00
  -5  -3   1  740.63   16.20
   4   3  -1   13.40    3.10
   4   3  -1   10.70    1.60
   4   3  -1   17.80    2.60
  -4  -3   1   16.10    2.90
  -4  -3   1   14.50    2.20
  -4  -3   1   15.60    1.60
   3   3  -1  358.66    8.80
   3   3  -1  374.96    9.70
   3   3  -1  363.46   11.90
  -3  -3   1  359.66    8.50
  -3  -3   1  359.76    9.40
   2   3  -1 1579.64   34.00
   2   3  -1 1660.93   31.40
   2   3  -1 1599.84   30.70
  -2  -3   1 1670.23   32.60
  -2  -3   1 1606.74   30.40
  -2  -3   1 1623.84   31.00
  -1  -3   1 4201.98   76.29
   0   3  -1  121.09    4.10
   0   3  -1  125.59    3.20
   0   3  -1  124.89    3.90
   0  -3   1  122.69    4.00
   0  -3   1  122.29    3.90
   0  -3   1  120.79    3.80
  -1   3  -1  312.97    7.50
  -1   3  -1  308.77    7.50
  -1   3  -1  316.77    7.00
  -1   3  -1  311.47    6.80
   1  -3   1  311.27    7.50
   1  -3   1  314.77    7.00
   1  -3   1  308.97    7.40
  -2   3  -1  451.75   10.70
  -2   3  -1  444.76   10.20
  -2   3  -1  468.65    9.50
  -2   3  -1  462.25    9.10
   2  -3   1  446.86    9.10
   2  -3   1  449.95   10.50
   2  -3   1  460.55    9.40
   2  -3   1  450.85   10.00
   2  -3   1  461.45    9.70
  -3   3  -1  307.47    7.00
  -3   3  -1  298.67    7.70
  -3   3  -1  310.67    9.10
   3  -3   1  297.27    7.40
   3  -3   1  292.07    7.00
   3  -3   1  307.47    6.90
   3  -3   1  307.57    8.50
  -4   3  -1    0.40    0.80
  -4   3  -1    0.20    0.70
  -4   3  -1   -0.10    1.30
   4  -3   1    0.00    0.60
   4  -3   1    1.00    0.80
   4  -3   1    1.00    1.20
   4  -3   1   -0.70    0.60
  -5   3  -1 1016.60   25.30
  -5   3  -1 1000.70   20.60
  -5   3  -1  983.80   20.60
   5  -3   1  877.51   24.90
   5  -3   1  986.20   20.20
   5  -3   1  972.20   20.50
  -6   3  -1  277.47   12.40
  -6   3  -1  266.37    8.20
  -6   3  -1  273.27    8.30
   6  -3   1  269.37   10.30
   6  -3   1  264.17    7.70
   6  -3   1  250.37    8.00
  -7   3  -1  128.09    5.70
  -7   3  -1  125.39    5.50
  -7   3  -1  132.69    9.40
   7  -3   1  124.59    5.10
   7  -3   1  134.69    7.60
   7  -3   1  122.39    5.60
  -8   3  -1    1.90    1.30
  -8   3  -1    7.20    3.70
  -8   3  -1    1.50    1.30
   8  -3   1    3.00    1.30
   8  -3   1    2.00    2.10
   8  -3   1    2.20    1.30
  -9   3  -1    6.10    2.00
  -9   3  -1    2.30    3.40
  -9   3  -1    6.00    2.00
   9  -3   1    3.30    1.90
   9  -3   1   12.90    3.60
   9  -3   1    5.90    1.70
 -10   3  -1    3.80    3.40
 -10   3  -1    1.80    1.80
 -10   3  -1    2.10    3.60
 -10   3  -1    5.70    1.00
  10  -3   1    3.30    1.50
  10  -3   1    1.60    2.20
  10  -3   1    2.40    1.70
 -11   3  -1   16.00    4.20
 -11   3  -1   15.30    5.60
 -11   3  -1   13.00    3.10
  11  -3   1   12.50    3.80
  11  -3   1   12.80    3.30
  11  -3   1   11.30    2.40
 -12   3  -1   10.70    3.00
 -12   3  -1   13.80    3.20
 -12   3  -1    3.30    4.30
  12  -3   1    9.30    3.70
  12  -3   1   16.30    2.80
  12  -3   1   12.00    3.30
 -13   3  -1   -1.90    1.70
 -13   3  -1   -0.80    1.70
 -13   3  -1   -4.20    3.60
  13  -3   1    1.50    1.70
  13  -3   1    0.60    2.10
  13  -3   1   -1.50    3.10
 -14   3  -1   10.40    5.60
 -14   3  -1   13.50    3.60
 -14   3  -1   -1.20    3.90
  14  -3   1   16.20    4.00
  14  -3   1   12.00    4.50
 -15   3  -1    1.70    2.80
 -15   3  -1    4.70    5.50
  15  -3   1   -2.70    3.80
  15  -3   1   -1.80    1.70
  15   2  -1    8.40    3.90
 -15  -2   1   -2.10    4.10
 -15  -2   1    0.10    2.60
 -15  -2   1    0.30    1.50
  14   2  -1   -6.60    3.80
  14   2  -1    0.90    1.80
 -14  -2   1    3.40    2.30
 -14  -2   1   -5.70    3.50
 -14  -2   1   -0.50    1.30
  13   2  -1    3.40    2.10
  13   2  -1    2.50    2.60
 -13  -2   1    2.50    2.50
 -13  -2   1   -0.10    3.40
 -13  -2   1    2.80    2.10
  12   2  -1   11.20    4.70
  12   2  -1   13.70    2.90
 -12  -2   1   10.60    2.90
 -12  -2   1    7.50    2.50
 -12  -2   1    6.90    4.00
  11   2  -1    0.40    1.80
  11   2  -1   -2.10    2.80
  11   2  -1    0.30    1.40
 -11  -2   1   -0.70    1.20
 -11  -2   1   -0.10    2.50
 -11  -2   1   -0.90    1.60
  10   2  -1   -2.50    2.90
  10   2  -1    1.40    1.40
  10   2  -1    0.10    1.40
 -10  -2   1   -3.60    2.30
 -10  -2   1    0.70    1.60
 -10  -2   1    0.90    1.30
   9   2  -1   46.60    7.20
   9   2  -1   39.40    4.30
   9   2  -1   42.70    3.50
  -9  -2   1   54.59    7.60
  -9  -2   1   42.80    3.50
   8   2  -1    7.90    2.10
   8   2  -1    8.80    3.80
   8   2  -1   10.30    2.00
  -8  -2   1    9.70    2.30
  -8  -2   1    9.30    1.90
  -8  -2   1    8.20    3.40
   7   2  -1    2.10    1.10
   7   2  -1    1.20    1.40
   7   2  -1   -0.20    1.90
  -7  -2   1    2.00    1.10
  -7  -2   1    2.90    1.50
  -7  -2   1    2.80    2.40
   6   2  -1   72.49    4.50
   6   2  -1   62.19    6.30
   6   2  -1   67.59    3.50
  -6  -2   1   73.89    6.40
  -6  -2   1   68.39    4.30
  -6  -2   1   63.79    3.30
   5   2  -1  450.55   10.70
   5   2  -1  434.86   15.60
   5   2  -1  436.16   12.00
  -5  -2   1  442.96   10.40
  -5  -2   1  445.86   12.00
  -5  -2   1  423.06   14.90
   4   2  -1 1889.91   41.80
   4   2  -1 1908.01   36.00
   4   2  -1 1890.31   37.50
  -4  -2   1 1944.81   37.40
  -4  -2   1 1883.41   35.70
  -4  -2   1 1950.70   40.90
   3   2  -1  706.73   15.50
   3   2  -1  711.83   14.40
   3   2  -1  690.93   18.10
  -3  -2   1  698.13   14.20
  -3  -2   1  717.03   15.40
  -3  -2   1  724.73   17.70
   2   2  -1   20.50    1.70
   2   2  -1   23.00    1.50
   2   2  -1   18.10    2.40
  -2  -2   1   20.20    1.70
  -2  -2   1   15.60    2.00
  -2  -2   1   23.40    1.40
   1   2  -1  375.36    8.80
   1   2  -1  356.46    7.70
   1   2  -1  393.96    8.10
  -1  -2   1  367.86    7.70
  -1  -2   1  369.46    8.60
  -1  -2   1  381.96    8.00
   0   2  -1 4110.69   82.69
   0  -2   1 4131.79   82.59
   0  -2   1 4205.58   82.79
  -1   2  -1 1962.60   35.80
   1  -2   1 1972.80   35.70
   1  -2   1 1982.50   36.00
   1  -2   1 1972.90   35.80
  -2   2  -1  428.36   10.20
  -2   2  -1  406.66    9.00
  -2   2  -1  433.26    8.60
   2  -2   1  417.36    8.90
   2  -2   1  430.66    8.70
   2  -2   1  416.86    8.60
   2  -2   1  416.16    9.80
  -3   2  -1  742.93   14.80
  -3   2  -1  737.53   17.50
   3  -2   1  726.33   16.60
   3  -2   1  703.13   14.60
   3  -2   1  721.13   14.70
  -4   2  -1 1131.69   22.60
  -4   2  -1 1154.28   22.80
   4  -2   1 1116.69   22.70
   4  -2   1 1137.59   22.40
   4  -2   1 1140.09   25.30
  -5   2  -1   91.69    4.20
  -5   2  -1   94.89    6.90
  -5   2  -1   88.29    3.90
   5  -2   1   86.49    4.10
   5  -2   1   95.19    3.70
   5  -2   1   83.69    5.60
  -6   2  -1   12.10    1.80
  -6   2  -1    9.30    1.80
  -6   2  -1   11.80    1.00
  -6   2  -1   12.70    3.50
   6  -2   1   12.80    2.20
   6  -2   1   10.90    1.60
   6  -2   1   10.40    2.80
  -7   2  -1   46.30    1.80
  -7   2  -1   45.60    6.50
  -7   2  -1   46.20    3.20
  -7   2  -1   46.60    3.60
   7  -2   1   43.50    3.60
   7  -2   1   48.90    5.10
   7  -2   1   43.00    2.90
  -8   2  -1  226.18   13.40
  -8   2  -1  236.58    8.10
  -8   2  -1  220.98    8.60
  -8   2  -1  224.28    5.20
   8  -2   1  232.88    7.60
   8  -2   1  218.58    8.60
   8  -2   1  221.78   11.10
  -9   2  -1   26.10    3.10
  -9   2  -1   25.60    5.90
  -9   2  -1   27.10    3.70
   9  -2   1   29.40    3.00
   9  -2   1   24.00    4.60
   9  -2   1   23.20    3.40
 -10   2  -1   17.40    5.60
 -10   2  -1   21.30    3.70
  10  -2   1   22.70    3.00
  10  -2   1   22.60    4.90
  10  -2   1   16.20    3.50
 -11   2  -1  102.59   10.90
 -11   2  -1   83.59    6.30
 -11   2  -1  105.39    6.90
  11  -2   1   93.79    5.50
  11  -2   1   86.89    8.60
  11  -2   1   94.59    6.60
 -12   2  -1   16.30    3.20
 -12   2  -1   12.60    3.30
  12  -2   1   14.50    4.40
  12  -2   1   14.40    3.50
  12  -2   1   16.00    2.90
 -13   2  -1   16.20    3.60
 -13   2  -1   10.20    5.10
 -13   2  -1   17.10    3.70
  13  -2   1   21.00    5.40
  13  -2   1   15.90    3.00
 -14   2  -1   14.20    6.30
 -14   2  -1   31.80    5.00
 -14   2  -1   24.40    4.20
  14  -2   1   36.70    6.40
  14  -2   1   22.50    6.20
  14  -2   1   30.30    4.30
 -15   2  -1   19.10    5.90
  15  -2   1    1.40    2.30
  15  -2   1   -0.50    4.30
  15   1  -1    7.60    3.10
 -15  -1   1   10.80    5.10
 -15  -1   1   13.90    3.80
  14   1  -1    4.80    2.50
  14   1  -1   -1.10    4.40
 -14  -1   1    5.10    2.80
 -14  -1   1    3.80    2.50
 -14  -1   1    2.80    3.90
  13   1  -1    0.70    1.50
  13   1  -1   -0.70    2.20
  13   1  -1    1.60    3.40
 -13  -1   1   -0.30    1.60
 -13  -1   1   -1.10    1.80
 -13  -1   1   -1.10    3.30
  12   1  -1    3.00    2.20
  12   1  -1   -2.80    2.80
 -12  -1   1    0.20    1.80
 -12  -1   1    0.90    3.30
 -12  -1   1    2.70    1.80
  11   1  -1   56.99    5.70
  11   1  -1   60.29    4.60
  11   1  -1   51.99    7.80
 -11  -1   1   50.69   11.30
 -11  -1   1   57.29    4.60
 -11  -1   1   57.39    5.40
  10   1  -1    2.30    2.90
  10   1  -1    6.60    2.60
  10   1  -1    2.30    1.50
 -10  -1   1    2.20    2.00
 -10  -1   1    6.10    1.90
 -10  -1   1    3.80    3.50
   9   1  -1  179.88   11.30
   9   1  -1  169.68    8.30
   9   1  -1  182.78    7.00
  -9  -1   1  171.28    8.20
  -9  -1   1  162.38   11.40
  -9  -1   1  167.98    6.90
   8   1  -1   34.20    5.80
   8   1  -1   34.30    3.70
   8   1  -1   27.60    2.70
  -8  -1   1   29.10    5.40
  -8  -1   1   32.20    2.90
  -8  -1   1   40.70    3.80
   7   1  -1   13.70    3.60
   7   1  -1   13.80    2.00
   7   1  -1   15.50    2.70
  -7  -1   1   18.70    3.00
  -7  -1   1   13.30    3.90
  -7  -1   1   18.40    2.10
   6   1  -1  150.88    5.30
   6   1  -1  149.29    8.90
   6   1  -1  144.69    6.30
  -6  -1   1  147.39    5.10
  -6  -1   1  150.18    6.30
  -6  -1   1  146.29    9.00
   5   1  -1  640.04   19.00
   5   1  -1  627.64   15.10
   5   1  -1  627.34   13.60
  -5  -1   1  616.24   15.10
  -5  -1   1  640.74   19.20
  -5  -1   1  578.94   14.60
   4   1  -1  172.08    5.90
   4   1  -1  167.18    4.80
  -4  -1   1  165.48    4.70
  -4  -1   1  178.98    6.00
  -4  -1   1  165.48    8.10
   3   1  -1    8.60    1.00
   3   1  -1    7.50    2.50
   3   1  -1    6.00    1.10
  -3  -1   1    8.20    1.00
  -3  -1   1    9.80    1.50
  -3  -1   1    8.10    2.20
   2   1  -1   78.49    1.70
   2   1  -1   82.99    3.00
   2   1  -1   80.39    2.40
   2   1  -1   77.09    4.20
  -2  -1   1   83.49    3.00
  -2  -1   1   85.79    4.20
  -2  -1   1   76.29    2.30
  -1  -1   1    5.30    0.30
  -1   1  -1  212.78    4.10
  -1   1  -1  195.28    4.20
  -2   1  -1   11.90    1.10
  -2   1  -1   12.20    0.70
  -2   1  -1   12.80    1.20
  -2   1  -1   13.70    2.00
   2  -1   1   12.80    1.00
   2  -1   1    7.30    1.60
   2  -1   1    9.90    1.20
  -3   1  -1  226.18    6.00
  -3   1  -1  219.28    5.60
  -3   1  -1  206.68    8.30
  -3   1  -1  237.88    4.60
   3  -1   1  216.08    5.40
   3  -1   1  214.58    7.80
   3  -1   1  217.88    6.00
  -4   1  -1   22.50    2.30
  -4   1  -1   25.10    1.80
  -4   1  -1   29.00    4.30
  -4   1  -1   24.80    1.10
   4  -1   1   20.30    3.30
   4  -1   1   22.40    2.10
  -5   1  -1  682.93   15.00
  -5   1  -1  708.63   16.00
  -5   1  -1  695.13   13.00
  -5   1  -1  708.13   21.00
   5  -1   1  692.73   16.10
   5  -1   1  686.23   14.90
   5  -1   1  674.33   19.20
  -6   1  -1   24.50    4.60
  -6   1  -1   27.90    1.20
  -6   1  -1   28.00    2.30
  -6   1  -1   30.50    2.80
   6  -1   1   28.30    4.40
   6  -1   1   28.70    2.80
   6  -1   1   27.80    2.20
  -7   1  -1   19.60    2.20
  -7   1  -1   19.90    2.80
  -7   1  -1   13.40    3.80
   7  -1   1   22.00    4.30
   7  -1   1   19.70    3.00
   7  -1   1   19.90    2.10
  -8   1  -1    6.90    1.70
  -8   1  -1   10.90    4.00
  -8   1  -1    8.60    2.40
   8  -1   1    9.60    3.40
   8  -1   1    6.00    1.50
   8  -1   1    6.50    1.90
  -9   1  -1  169.48    7.90
  -9   1  -1  172.08   12.40
  -9   1  -1  162.88    7.00
   9  -1   1  160.08   10.50
   9  -1   1  179.78   10.10
   9  -1   1  175.88    6.90
 -10   1  -1    8.80    4.30
 -10   1  -1    0.70    1.50
  10  -1   1    2.00    2.90
  10  -1   1    0.80    1.20
  10  -1   1   -0.10    2.20
 -11   1  -1  194.88    9.50
 -11   1  -1  207.68   14.90
 -11   1  -1  217.08   11.30
  11  -1   1  202.28    8.40
  11  -1   1  198.78    9.80
  11  -1   1  192.48   13.40
 -12   1  -1    9.30    2.70
 -12   1  -1    1.60    3.60
 -12   1  -1    4.90    2.60
  12  -1   1   13.50    4.60
  12  -1   1    7.50    2.20
  12  -1   1    8.80    3.20
 -13   1  -1   18.10    3.80
 -13   1  -1   18.00    3.50
 -13   1  -1   27.10    7.30
  13  -1   1   17.60    5.60
  13  -1   1   14.20    3.60
  13  -1   1   12.30    3.00
 -14   1  -1   17.80    3.90
 -14   1  -1   22.50    6.10
 -14   1  -1   11.70    3.40
  14  -1   1   19.10    6.10
  14  -1   1   24.80    4.00
 -15   1  -1    4.90    5.70
 -15   1  -1    5.10    2.70
  15  -1   1    6.70    4.60
  15  -1   1    1.30    2.00
  15   0  -1   13.60    3.40
  15   0  -1    4.10    4.50
 -15   0   1    2.00    4.80
 -15   0   1   11.70    3.80
  14   0  -1   13.90    3.10
  14   0  -1   12.00    4.90
 -14   0   1   16.80    3.80
 -14   0   1   15.50    3.30
 -14   0   1    8.50    5.20
  13   0  -1    4.10    2.60
  13   0  -1    1.00    3.10
  13   0  -1    1.80    1.70
 -13   0   1    4.10    3.90
 -13   0   1    0.50    1.90
 -13   0   1    3.50    2.30
  12   0  -1   57.59    8.30
  12   0  -1   60.59    5.30
  12   0  -1   53.19    5.60
 -12   0   1   58.19    5.00
 -12   0   1   47.20    5.20
 -12   0   1   51.09    9.00
  11   0  -1   73.99    6.10
  11   0  -1   83.89    8.40
  11   0  -1   70.09    4.80
 -11   0   1   73.19    5.90
 -11   0   1   70.59    5.10
 -11   0   1   70.69    9.90
  10   0  -1    2.50    2.70
  10   0  -1    0.60    1.30
  10   0  -1   -0.50    2.20
 -10   0   1   -0.30    1.20
 -10   0   1   -2.50    2.40
 -10   0   1    0.70    1.50
   9   0  -1  119.59    5.50
   9   0  -1   99.59    9.30
   9   0  -1  130.99    9.30
  -9   0   1  115.29   10.10
  -9   0   1  125.69    5.80
  -9   0   1  113.39    6.40
   8   0  -1  141.89    5.60
   8   0  -1  127.49    6.70
   8   0  -1  136.69    9.00
  -8   0   1  146.69   10.40
  -8   0   1  148.79    7.00
  -8   0   1  146.39    5.90
   7   0  -1    6.90    2.00
   7   0  -1    6.10    1.30
   7   0  -1    6.90    2.90
  -7   0   1    8.10    3.10
  -7   0   1    9.00    1.60
  -7   0   1    8.30    2.20
   6   0  -1    7.80    1.80
   6   0  -1   11.10    3.10
   6   0  -1    9.30    1.50
  -6   0   1   16.00    2.40
  -6   0   1    7.90    3.00
  -6   0   1    9.40    1.60
   5   0  -1   36.90    2.90
   5   0  -1   34.00    4.20
   5   0  -1   35.60    2.20
  -5   0   1   42.40    4.80
  -5   0   1   39.20    3.00
   4   0  -1 1733.53   33.90
   4   0  -1 1759.22   36.80
   4   0  -1 1723.03   32.50
  -4   0   1 1833.22   36.00
  -4   0   1 1733.93   37.70
  -4   0   1 1679.53   32.50
   3   0  -1   22.80    2.00
   3   0  -1   20.00    2.90
   3   0  -1   21.60    1.40
  -3   0   1   25.60    3.30
  -3   0   1   24.50    1.90
  -3   0   1   24.10    1.50
   2   0  -1 3346.97   61.79
  -2   0   1 3392.96   62.19
   1   0  -1    0.00    0.30
   1   0  -1    0.20    0.20
  -1   0   1   -0.10    0.10
  -1   0  -1   48.90    1.50
  -1   0  -1   56.19    1.60
   1   0   1   47.40    1.50
   1   0   1   55.39    1.80
   1   0   1   54.19    1.30
  -2   0  -1 2293.97   41.40
  -2   0  -1 2223.08   40.70
  -2   0  -1 2290.47   44.30
   2   0   1 2222.28   40.80
   2   0   1 2283.07   44.30
  -3   0  -1   20.00    3.20
  -3   0  -1   23.50    1.60
  -3   0  -1   21.80    1.80
   3   0   1   23.20    0.80
   3   0   1   21.20    1.50
   3   0   1   22.00    1.90
   3   0   1   18.10    3.00
  -4   0  -1  103.89    4.30
  -4   0  -1   97.09    3.60
  -4   0  -1  102.39    6.70
   4   0   1   99.49    4.30
   4   0   1   98.19    4.70
  -5   0  -1  152.78    8.90
  -5   0  -1  150.78    5.00
  -5   0  -1  147.89    5.80
   5   0   1  146.59    4.90
   5   0   1  143.39    5.80
   5   0   1  145.69    8.50
  -6   0  -1   26.30    2.70
  -6   0  -1   26.50    4.80
  -6   0  -1   23.50    2.20
   6   0   1   24.90    2.20
   6   0   1   20.90    4.10
   6   0   1   23.10    2.70
  -7   0  -1   91.79    5.20
  -7   0  -1   98.59    4.60
  -7   0  -1   99.69    8.30
   7   0   1   98.39    4.50
   7   0   1   81.59    7.30
   7   0   1  103.99    5.60
  -8   0  -1  123.59    6.50
  -8   0  -1  117.49    9.50
  -8   0  -1  126.09    5.60
   8   0   1  118.39    6.50
   8   0   1  125.79    5.50
   8   0   1  119.99    9.20
  -9   0  -1  220.48    9.20
  -9   0  -1  204.18    7.90
  -9   0  -1  217.08   13.60
   9   0   1  202.98    9.20
   9   0   1  213.48    7.90
   9   0   1  227.08   12.90
 -10   0  -1    0.30    1.40
 -10   0  -1    3.60    3.30
 -10   0  -1    1.40    1.50
  10   0   1    1.40    2.70
  10   0   1   -0.20    1.40
  10   0   1    1.10    1.30
 -11   0  -1  152.68   12.80
 -11   0  -1  125.69    7.70
  11   0   1  133.59    8.30
  11   0   1  140.69   11.40
  11   0   1  139.69    7.00
 -12   0  -1   -1.30    1.50
 -12   0  -1   -0.80    1.60
 -12   0  -1    3.80    3.60
  12   0   1    2.00    3.40
  12   0   1    1.60    1.50
  12   0   1   -1.20    1.70
 -13   0  -1  129.69   12.40
 -13   0  -1  121.99   12.70
 -13   0  -1  129.29    7.70
  13   0   1  118.49   11.30
  13   0   1  135.79    7.70
  13   0   1  124.59    8.90
 -14   0  -1    3.10    2.70
 -14   0  -1   14.30    3.40
 -14   0  -1    7.60    5.10
 -14   0  -1    7.50    2.20
  14   0   1    9.40    4.60
  14   0   1   12.70    3.10
  15  -1  -1   12.70    3.00
  15  -1  -1    9.50    4.70
 -15   1   1   30.60    7.00
 -15   1   1   16.00   10.70
  14  -1  -1    0.50    1.70
  14  -1  -1   -1.90    2.70
  14  -1  -1    2.10    2.60
 -14   1   1    0.50    2.30
 -14   1   1   -0.30    4.10
 -14   1   1    2.20    2.20
  13  -1  -1   14.00    4.60
  13  -1  -1   13.90    5.50
  13  -1  -1   10.10    2.40
 -13   1   1    6.90    2.50
 -13   1   1   12.00    5.30
 -13   1   1   15.80    3.60
  12  -1  -1    7.50    2.70
  12  -1  -1    5.30    2.00
  12  -1  -1    3.70    3.20
 -12   1   1    5.30    2.30
 -12   1   1    5.60    2.40
 -12   1   1    1.20    3.80
  11  -1  -1   28.60    4.60
  11  -1  -1   35.30    3.50
  11  -1  -1   25.00    5.30
 -11   1   1   32.50    3.70
 -11   1   1   36.60    5.00
 -11   1   1   30.00    6.80
  10  -1  -1  164.28    8.30
  10  -1  -1  173.98    7.00
  10  -1  -1  168.28   10.50
 -10   1   1  173.88   12.90
 -10   1   1  148.69    8.40
 -10   1   1  166.48    7.40
   9  -1  -1   11.60    2.00
   9  -1  -1   14.20    3.80
   9  -1  -1   12.40    2.70
  -9   1   1   11.90    2.30
  -9   1   1   10.00    4.00
  -9   1   1   11.70    2.80
   8  -1  -1   87.99    5.30
   8  -1  -1   96.59    7.30
   8  -1  -1   95.99    4.50
  -8   1   1   97.29    8.50
  -8   1   1   92.29    4.80
  -8   1   1   97.19    5.50
   7  -1  -1    0.30    1.00
   7  -1  -1   -0.60    1.50
   7  -1  -1    0.20    0.80
  -7   1   1    0.40    0.90
  -7   1   1    1.10    1.00
  -7   1   1    0.30    2.20
   6  -1  -1   27.40    2.70
   6  -1  -1   30.10    2.20
   6  -1  -1   30.30    4.10
  -6   1   1   31.80    2.80
  -6   1   1   30.80    2.50
  -6   1   1   41.10    6.00
   5  -1  -1   18.70    2.10
   5  -1  -1   20.90    3.20
   5  -1  -1   19.70    1.80
  -5   1   1   18.70    2.30
  -5   1   1   18.60    2.20
  -5   1   1   13.50    3.20
   4  -1  -1  110.69    5.40
   4  -1  -1  113.29    3.70
   4  -1  -1  108.29    4.20
  -4   1   1  110.19    4.30
  -4   1   1  110.09    3.80
  -4   1   1  113.89    6.10
   3  -1  -1 6357.06  133.19
   3  -1  -1 6334.67  130.59
  -3   1   1 6488.55  129.89
  -3   1   1 6479.85  133.19
   2  -1  -1 1918.71   36.00
  -2   1   1 1960.30   36.30
   1  -1  -1  783.32   14.10
  -1   1   1  683.43   14.00
   0  -1  -1  341.57    7.80
   0   1   1  443.76    7.80
  -1  -1  -1  734.63   13.50
  -1  -1  -1  750.62   15.50
  -1  -1  -1  737.93   14.00
  -1  -1  -1  712.53   13.90
   1   1   1  723.83   14.40
   1   1   1  712.03   15.70
   1   1   1  725.63   14.00
   1   1   1  756.12   13.50
  -2  -1  -1  385.96    7.70
  -2  -1  -1  376.56    8.90
  -2  -1  -1  387.16   10.80
  -2  -1  -1  391.56    8.30
   2   1   1  390.86    8.40
   2   1   1  393.86   11.30
   2   1   1  393.66    9.10
  -3  -1  -1    1.40    0.70
  -3  -1  -1    0.70    1.50
   3   1   1    1.60    0.70
   3   1   1    1.70    2.00
   3   1   1    1.90    0.90
  -4  -1  -1   76.29    5.70
  -4  -1  -1   70.09    3.00
  -4  -1  -1   72.79    3.70
   4   1   1   68.49    3.10
   4   1   1   58.19    6.40
  -5  -1  -1   30.60    2.80
  -5  -1  -1   32.80    4.80
  -5  -1  -1   30.50    2.20
   5   1   1   33.20    5.00
   5   1   1   32.40    3.00
   5   1   1   29.20    2.30
  -6  -1  -1   14.60    2.40
  -6  -1  -1   21.50    4.20
  -6  -1  -1   17.20    2.00
   6   1   1   17.80    2.00
   6   1   1   22.30    2.70
   6   1   1   19.30    4.50
  -7  -1  -1    4.80    1.60
  -7  -1  -1    6.00    1.50
  -7  -1  -1    5.50    2.90
   7   1   1    6.90    1.50
   7   1   1    3.20    1.50
   7   1   1    2.70    2.90
  -8  -1  -1  145.89   10.50
  -8  -1  -1  150.68    7.20
  -8  -1  -1  151.78    6.20
   8   1   1  144.49   10.60
   8   1   1  138.89    7.40
   8   1   1  150.78    6.30
  -9  -1  -1   75.79    8.20
  -9  -1  -1   71.09    4.60
  -9  -1  -1   63.79    6.10
   9   1   1   75.99    7.90
   9   1   1   65.19    5.40
   9   1   1   81.19    4.80
 -10  -1  -1   44.80    7.70
 -10  -1  -1   51.39    4.20
 -10  -1  -1   60.49    5.20
  10   1   1   58.09    4.40
  10   1   1   44.00    4.90
  10   1   1   54.09    8.20
 -11  -1  -1   21.90    3.30
 -11  -1  -1   14.60    3.20
 -11  -1  -1    8.50    4.40
  11   1   1   18.30    3.10
  11   1   1   29.50    6.30
  11   1   1   34.20    5.30
 -12  -1  -1    1.40    3.40
 -12  -1  -1    2.80    1.70
 -12  -1  -1    2.00    2.10
  12   1   1    0.60    1.40
  12   1   1    0.50    3.40
  12   1   1    0.10    2.30
 -13  -1  -1    3.50    4.20
 -13  -1  -1    7.00    1.90
 -13  -1  -1    4.80    2.30
 -13  -1  -1    4.80    2.60
  13   1   1   15.50    5.60
  13   1   1    4.90    5.10
  13   1   1    4.30    2.40
 -14  -1  -1   23.30    4.30
 -14  -1  -1   17.70    6.40
 -14  -1  -1   20.60    3.10
  14   1   1   26.00   11.10
  15  -2  -1    1.00    3.30
  15  -2  -1   -0.30    1.50
 -15   2   1   -0.20    4.50
 -15   2   1    1.30    2.80
  14  -2  -1   65.29    7.80
  14  -2  -1   49.10    6.00
  14  -2  -1   51.89    4.90
 -14   2   1   60.29    5.70
 -14   2   1   41.60    9.30
 -14   2   1   53.09    9.70
  13  -2  -1    0.80    1.50
  13  -2  -1    3.10    2.40
  13  -2  -1   -0.40    2.80
 -13   2   1    1.90    1.90
 -13   2   1   -0.40    2.00
  12  -2  -1   17.20    2.90
  12  -2  -1   20.50    3.70
 -12   2   1   20.40    6.50
 -12   2   1   16.80    3.30
 -12   2   1   16.70    3.70
  11  -2  -1   13.20    3.20
  11  -2  -1    0.40    2.90
  11  -2  -1    5.20    1.80
 -11   2   1    4.80    4.20
 -11   2   1    4.70    2.10
 -11   2   1    3.80    2.00
  10  -2  -1  179.68    8.40
  10  -2  -1  188.68    7.30
  10  -2  -1  187.48   10.80
 -10   2   1  179.28    7.90
 -10   2   1  184.28   13.10
 -10   2   1  175.68    8.40
   9  -2  -1  245.88   11.70
   9  -2  -1  243.98    8.20
   9  -2  -1  243.68    9.60
  -9   2   1  256.27    9.10
  -9   2   1  254.77    9.90
  -9   2   1  257.47   14.80
   8  -2  -1   15.20    3.40
   8  -2  -1   14.60    2.10
   8  -2  -1   16.80    2.60
  -8   2   1   15.00    2.50
  -8   2   1   17.50    2.50
  -8   2   1   17.30    4.60
   7  -2  -1   46.80    4.60
   7  -2  -1   50.29    3.60
   7  -2  -1   47.20    3.00
  -7   2   1   54.99    6.10
  -7   2   1   50.89    3.40
  -7   2   1   50.49    3.70
   6  -2  -1    5.10    1.50
   6  -2  -1    4.50    1.90
   6  -2  -1    3.80    1.10
  -6   2   1    6.30    2.70
  -6   2   1    4.50    1.30
  -6   2   1    3.00    1.20
   5  -2  -1  227.48    7.00
   5  -2  -1  215.68    6.20
   5  -2  -1  219.48    8.20
  -5   2   1  218.08    6.90
  -5   2   1  218.18    9.30
  -5   2   1  224.88    6.70
   4  -2  -1  130.19    4.70
   4  -2  -1  132.29    4.30
  -4   2   1  130.39    4.60
  -4   2   1  130.59    6.00
  -4   2   1  132.89    4.70
   3  -2  -1 3538.75   64.69
   3  -2  -1 3612.64   65.89
  -3   2   1 3581.24   64.99
  -3   2   1 3597.94   66.39
   2  -2  -1  659.03   13.50
   2  -2  -1  652.43   13.80
  -2   2   1  649.54   13.50
  -2   2   1  666.03   13.70
  -2   2   1  688.63   13.30
  -2   2   1  663.33   14.00
   1  -2  -1   15.90    1.60
   1  -2  -1   16.80    1.30
   1  -2  -1   14.30    1.40
  -1   2   1   16.40    1.60
  -1   2   1   16.40    1.50
  -1   2   1   15.70    1.10
   0  -2  -1  269.87    5.80
   0  -2  -1  273.27    5.80
   0  -2  -1  264.77    6.80
   0  -2  -1  266.17    6.40
   0   2   1  269.67    6.40
   0   2   1  269.97    5.70
   0   2   1  264.37    6.90
  -1  -2  -1  126.29    3.30
  -1  -2  -1  124.79    3.70
   1   2   1  120.99    3.80
   1   2   1  126.19    2.90
   1   2   1  122.89    3.90
  -2  -2  -1  441.56    8.60
  -2  -2  -1  444.16   11.90
  -2  -2  -1  444.56    9.60
   2   2   1  433.96    9.80
   2   2   1  432.86   12.40
   2   2   1  430.36   10.30
  -3  -2  -1  397.46   10.00
  -3  -2  -1  378.96    8.90
  -3  -2  -1  381.06    7.90
  -3  -2  -1  407.96   12.30
   3   2   1  376.66   10.00
   3   2   1  386.16   12.90
   3   2   1  381.26    9.20
  -4  -2  -1   84.49    4.20
  -4  -2  -1   86.79    6.10
  -4  -2  -1   84.49    3.50
  -4  -2  -1   86.39    2.70
   4   2   1   78.89    6.40
   4   2   1   85.39    3.60
   4   2   1   82.69    4.30
  -5  -2  -1  383.86   14.20
  -5  -2  -1  382.36    9.70
  -5  -2  -1  380.76    8.30
  -5  -2  -1  378.16   10.90
   5   2   1  387.16   11.30
   5   2   1  367.86   15.00
   5   2   1  365.46    9.80
  -6  -2  -1   35.30    5.30
  -6  -2  -1   47.50    3.00
  -6  -2  -1   48.90    3.70
   6   2   1   46.20    6.60
   6   2   1   41.60    3.70
   6   2   1   46.60    3.20
  -7  -2  -1    8.10    3.20
  -7  -2  -1   11.20    1.90
  -7  -2  -1   10.50    2.40
   7   2   1   11.40    2.00
   7   2   1    7.50    1.80
   7   2   1   12.00    4.20
  -8  -2  -1    0.40    2.10
  -8  -2  -1   -1.00    1.00
  -8  -2  -1    2.00    1.60
  -8  -2  -1    1.30    0.90
   8   2   1   -0.90    0.90
   8   2   1   -0.10    1.20
   8   2   1   -3.40    2.40
  -9  -2  -1    5.70    3.10
  -9  -2  -1    2.70    1.90
  -9  -2  -1    2.90    1.60
  -9  -2  -1    2.90    1.20
   9   2   1    1.80    1.70
   9   2   1   -0.70    2.70
   9   2   1    5.10    1.80
 -10  -2  -1    3.20    1.60
 -10  -2  -1    0.10    1.50
 -10  -2  -1   -3.70    1.90
 -10  -2  -1    0.80    1.10
  10   2   1    0.20    1.70
  10   2   1   -0.40    1.30
  10   2   1   -2.20    2.80
 -11  -2  -1   10.90    2.90
 -11  -2  -1   11.30    2.60
 -11  -2  -1   10.70    2.00
 -11  -2  -1    5.00    3.60
  11   2   1   15.20    2.80
  11   2   1   21.20    7.10
  11   2   1   11.70    3.10
 -12  -2  -1   60.49    5.90
 -12  -2  -1   54.19    9.00
 -12  -2  -1   67.69    5.30
 -12  -2  -1   69.89    4.00
  12   2   1   69.99    6.80
  12   2   1   66.99    5.60
  12   2   1   65.79    9.60
 -13  -2  -1    4.90    2.50
 -13  -2  -1    7.10    3.00
 -13  -2  -1    3.60    3.40
 -13  -2  -1    3.80    1.50
  13   2   1   -0.50    5.00
  13   2   1    7.20    2.80
 -14  -2  -1   12.50    5.50
 -14  -2  -1   14.10    2.30
 -14  -2  -1   10.00    3.30
  14   2   1    9.10    2.80
  14   2   1   10.20    5.70
  15  -3  -1   -4.90    2.80
  15  -3  -1   -0.60    1.50
  15  -3  -1    0.10    1.70
 -15   3   1    4.70    2.80
 -15   3   1    7.10    5.20
 -15   3   1   -7.50    4.50
  14  -3  -1   -2.00    2.20
  14  -3  -1    2.40    1.90
  14  -3  -1    2.70    3.10
 -14   3   1    1.30    4.80
 -14   3   1   -1.50    2.10
 -14   3   1    0.10    2.20
  13  -3  -1   30.60    3.70
  13  -3  -1   28.80    5.60
  13  -3  -1   26.30    4.50
 -13   3   1   28.90    4.50
 -13   3   1   33.50    7.80
 -13   3   1   24.60    4.20
  12  -3  -1    1.90    1.60
  12  -3  -1    2.00    1.80
  12  -3  -1    6.90    4.70
 -12   3   1    1.60    1.90
 -12   3   1    2.50    1.90
 -12   3   1    0.30    3.90
  11  -3  -1  111.39    5.80
  11  -3  -1  108.49    7.90
 -11   3   1  114.39    7.00
 -11   3   1  107.09    6.50
 -11   3   1  113.69   11.00
  10  -3  -1   17.90    3.60
  10  -3  -1   10.20    3.40
  10  -3  -1   11.20    2.20
 -10   3   1   14.30    3.00
 -10   3   1   11.90    2.60
 -10   3   1   15.60    5.10
   9  -3  -1  382.16   14.60
   9  -3  -1  372.46   12.40
   9  -3  -1  400.06   11.20
  -9   3   1  395.06   12.10
  -9   3   1  390.96   12.60
  -9   3   1  377.66   17.90
   8  -3  -1   16.60    2.20
   8  -3  -1   19.90    3.60
   8  -3  -1   15.30    2.60
  -8   3   1   13.40    3.90
  -8   3   1   15.40    2.60
  -8   3   1   16.60    2.60
   7  -3  -1   10.80    1.70
   7  -3  -1   10.80    2.10
   7  -3  -1   12.20    2.80
  -7   3   1   13.20    2.60
  -7   3   1    9.80    3.10
  -7   3   1   12.50    2.10
   6  -3  -1   -0.20    0.80
   6  -3  -1    0.50    0.90
   6  -3  -1    0.20    1.20
   6  -3  -1    0.60    0.50
  -6   3   1    0.60    1.00
  -6   3   1    0.50    0.90
   5  -3  -1   88.49    4.90
   5  -3  -1   90.99    3.90
   5  -3  -1   89.69    2.60
  -5   3   1   96.59    5.80
  -5   3   1   92.89    4.20
  -5   3   1   81.99    4.00
   4  -3  -1  301.27    6.00
   4  -3  -1  297.57    7.80
   4  -3  -1  291.87    7.90
   4  -3  -1  298.67    8.80
  -4   3   1  300.07    9.40
  -4   3   1  288.97    7.80
  -4   3   1  286.17    8.30
   3  -3  -1   84.29    3.40
   3  -3  -1   77.39    3.70
  -3   3   1   84.39    2.30
  -3   3   1   82.29    3.00
  -3   3   1   82.39    3.40
  -3   3   1   84.39    3.70
  -3   3   1   83.89    4.00
   2  -3  -1  856.41   16.70
   2  -3  -1  859.11   17.90
   2  -3  -1  853.61   17.60
  -2   3   1  863.81   16.50
  -2   3   1  851.21   17.90
  -2   3   1  850.31   17.80
   1  -3  -1    2.90    0.70
   1  -3  -1    1.80    0.90
   1  -3  -1    3.10    1.00
  -1   3   1    3.70    1.10
  -1   3   1    1.70    0.60
  -1   3   1    3.20    0.60
  -1   3   1    3.00    0.90
   0  -3  -1  204.28    4.80
   0  -3  -1  201.48    5.70
   0  -3  -1  200.88    4.80
   0  -3  -1  205.38    6.20
   0   3   1  203.78    5.80
   0   3   1  200.88    6.30
   0   3   1  207.48    4.70
  -1  -3  -1   83.29    3.30
  -1  -3  -1   82.49    2.70
   1   3   1   83.09    4.30
   1   3   1   78.49    3.30
  -2  -3  -1   93.89    4.90
  -2  -3  -1   85.29    3.50
   2   3   1   93.39    3.80
   2   3   1   93.29    4.00
   2   3   1   92.29    2.40
   2   3   1   85.89    5.20
  -3  -3  -1  641.94   14.70
  -3  -3  -1  622.74   12.10
  -3  -3  -1  635.24   13.70
  -3  -3  -1  662.53   17.10
   3   3   1  613.34   17.90
   3   3   1  624.24   14.90
   3   3   1  583.54   14.20
  -4  -3  -1    2.30    1.70
  -4  -3  -1    0.20    0.90
  -4  -3  -1    1.00    0.80
  -4  -3  -1   -0.30    0.50
   4   3   1    1.00    0.90
   4   3   1    0.40    2.10
   4   3   1    2.20    1.30
  -5  -3  -1   91.09    4.10
  -5  -3  -1   94.49    6.50
  -5  -3  -1   83.19    4.70
  -5  -3  -1   89.39    3.00
   5   3   1   83.19    4.90
   5   3   1   88.79    4.30
   5   3   1   87.69    7.50
  -6  -3  -1   11.00    3.30
  -6  -3  -1   10.80    2.20
  -6  -3  -1   11.30    1.80
   6   3   1   11.20    2.50
   6   3   1   10.40    1.90
   6   3   1   16.00    4.30
  -7  -3  -1   12.40    1.40
  -7  -3  -1   16.30    2.90
  -7  -3  -1   12.10    3.70
  -7  -3  -1   11.20    1.90
   7   3   1   17.00    4.60
   7   3   1    9.10    2.40
   7   3   1   13.60    2.20
  -8  -3  -1   12.30    1.60
  -8  -3  -1   12.50    4.00
  -8  -3  -1   12.20    2.70
  -8  -3  -1   15.30    2.40
   8   3   1    9.10    2.90
   8   3   1    8.40    2.10
   8   3   1    4.50    3.50
  -9  -3  -1   -0.60    0.80
  -9  -3  -1   -0.10    1.10
  -9  -3  -1    0.60    1.20
  -9  -3  -1   -2.50    2.20
   9   3   1   -1.40    2.80
   9   3   1    1.10    1.50
   9   3   1   -0.40    1.30
 -10  -3  -1   32.80    3.70
 -10  -3  -1   30.80    2.50
 -10  -3  -1   31.00    4.40
 -10  -3  -1   29.50    6.20
  10   3   1   23.20    6.30
  10   3   1   34.40    5.20
 -11  -3  -1    4.30    2.00
 -11  -3  -1    0.00    2.80
 -11  -3  -1    5.50    2.60
 -11  -3  -1    4.40    1.40
  11   3   1    1.40    1.70
  11   3   1    5.20    4.20
 -12  -3  -1    0.50    1.50
 -12  -3  -1    0.40    1.20
 -12  -3  -1    1.70    2.20
 -12  -3  -1    1.90    3.50
  12   3   1    1.90    2.00
  12   3   1   -1.30    3.10
  12   3   1    1.40    2.10
 -13  -3  -1   -3.80    3.00
 -13  -3  -1    4.90    1.70
 -13  -3  -1    1.50    3.80
  13   3   1    5.10    2.40
  13   3   1   -0.90    4.50
 -14  -3  -1   17.00    5.40
 -14  -3  -1   12.60    2.20
  14   3   1    6.50    3.10
  14   3   1    4.80    7.60
  15  -4  -1    0.50    1.30
  15  -4  -1   -0.70    1.60
  15  -4  -1   -4.60    3.00
 -15   4   1    6.10    4.00
 -15   4   1    0.20    5.20
 -15   4   1   -1.60    2.30
  14  -4  -1   36.60    5.40
  14  -4  -1   38.70    6.70
  14  -4  -1   32.40    3.90
  14  -4  -1   31.90    2.80
 -14   4   1   38.20    5.30
 -14   4   1   30.20    7.50
 -14   4   1   21.20    4.10
  13  -4  -1   12.20    2.70
  13  -4  -1   14.00    3.40
  13  -4  -1   10.80    4.00
  13  -4  -1    9.40    1.70
 -13   4   1   14.50    3.40
 -13   4   1   12.70    3.50
 -13   4   1    6.70    5.10
  12  -4  -1   37.90    2.70
  12  -4  -1   42.00    6.90
  12  -4  -1   44.70    4.90
  12  -4  -1   39.60    6.60
 -12   4   1   42.00    2.10
 -12   4   1   39.70    4.60
 -12   4   1   34.60    7.80
 -12   4   1   44.10    4.80
  11  -4  -1    6.20    2.40
  11  -4  -1    6.10    1.40
  11  -4  -1    7.70    5.10
  11  -4  -1    1.90    1.50
 -11   4   1    3.50    3.50
 -11   4   1    6.00    2.30
 -11   4   1    2.70    1.90
  10  -4  -1    2.90    2.00
  10  -4  -1    1.30    1.30
  10  -4  -1    2.20    2.20
  10  -4  -1    2.20    1.00
 -10   4   1    2.10    1.60
 -10   4   1    2.00    1.50
 -10   4   1    3.00    3.30
   9  -4  -1   -0.20    1.00
   9  -4  -1    0.40    1.80
   9  -4  -1    0.00    0.60
   9  -4  -1    0.50    1.20
  -9   4   1    2.90    1.70
  -9   4   1    1.50    2.70
  -9   4   1    0.10    1.10
   8  -4  -1   -0.30    0.80
   8  -4  -1    0.40    1.40
   8  -4  -1    0.30    1.20
   8  -4  -1    0.50    1.00
  -8   4   1    0.60    2.30
  -8   4   1   -0.30    1.10
  -8   4   1    0.80    1.40
   7  -4  -1   43.00    4.10
   7  -4  -1   41.50    3.00
   7  -4  -1   39.60    3.30
   7  -4  -1   39.80    1.90
  -7   4   1   43.00    3.40
  -7   4   1   45.30    5.10
  -7   4   1   36.80    3.20
   6  -4  -1  679.73   17.60
   6  -4  -1  686.73   15.70
   6  -4  -1  687.53   13.30
   6  -4  -1  647.34   16.10
  -6   4   1  667.53   19.20
  -6   4   1  679.23   16.40
  -6   4   1  693.73   16.10
   5  -4  -1 1261.37   26.50
   5  -4  -1 1296.07   28.00
   5  -4  -1 1296.97   23.80
   5  -4  -1 1313.57   26.50
  -5   4   1 1284.37   27.10
  -5   4   1 1315.77   26.50
  -5   4   1 1297.97   29.10
   4  -4  -1  432.16   10.70
   4  -4  -1  401.66   11.20
  -4   4   1  421.56    8.60
  -4   4   1  411.16   12.00
  -4   4   1  434.06   11.10
  -4   4   1  432.56    9.70
  -4   4   1  420.36   10.50
   3  -4  -1    3.20    0.50
   3  -4  -1    3.90    1.30
   3  -4  -1    5.60    1.40
  -3   4   1    4.90    0.80
  -3   4   1    3.30    0.70
  -3   4   1    3.60    1.10
  -3   4   1    4.20    1.40
  -3   4   1    1.90    1.00
   2  -4  -1  276.87    7.80
   2  -4  -1  269.47    6.60
   2  -4  -1  275.17    6.20
   2  -4  -1  266.87    7.80
  -2   4   1  274.17    6.20
  -2   4   1  276.27    8.00
  -2   4   1  271.07    5.80
  -2   4   1  264.47    7.80
   1  -4  -1    0.70    0.60
   1  -4  -1    1.00    0.90
   1  -4  -1    0.20    0.80
  -1   4   1    0.50    1.10
  -1   4   1    0.70    0.40
  -1   4   1    0.40    0.50
  -1   4   1    1.00    0.90
  -1   4   1   -0.30    0.50
   0  -4  -1    6.20    1.40
   0  -4  -1    4.10    0.80
   0  -4  -1    4.40    0.80
   0  -4  -1    4.80    1.30
   0   4   1    5.40    1.00
   0   4   1    6.30    1.40
   0   4   1    6.10    1.60
   0   4   1    5.70    0.80
  -1  -4  -1   73.39    4.10
  -1  -4  -1   70.79    3.40
  -1  -4  -1   70.29    2.60
   1   4   1   68.19    3.40
  -2  -4  -1  115.39    4.50
  -2  -4  -1  117.19    5.80
  -2  -4  -1  118.79    3.90
   2   4   1  123.39    6.40
   2   4   1  137.69    3.10
  -3  -4  -1  150.58    7.20
  -3  -4  -1  149.79    5.20
   3   4   1  158.18    8.30
   3   4   1  149.59    5.70
   3   4   1  156.68    6.10
  -4  -4  -1   24.80    3.80
  -4  -4  -1   22.50    2.10
   4   4   1   29.00    2.90
   4   4   1   26.50    4.60
  -5  -4  -1    3.90    2.00
  -5  -4  -1   -0.20    0.50
  -5  -4  -1    0.20    0.80
  -5  -4  -1    1.00    1.20
   5   4   1    2.00    2.50
   5   4   1   -0.50    0.80
   5   4   1   -0.80    0.90
  -6  -4  -1   14.80    1.40
  -6  -4  -1   19.30    2.40
  -6  -4  -1   14.50    2.70
  -6  -4  -1   23.80    4.40
   6   4   1   21.80    3.80
   6   4   1   19.80    2.70
   6   4   1   19.40    4.90
  -7  -4  -1   -2.00    1.40
  -7  -4  -1   -0.60    0.60
  -7  -4  -1    0.50    1.30
  -7  -4  -1   -0.90    0.90
   7   4   1   -0.80    1.30
   7   4   1    0.00    2.60
   7   4   1   -0.30    1.00
  -8  -4  -1   50.39    6.30
  -8  -4  -1   46.90    4.50
  -8  -4  -1   47.70    2.60
  -8  -4  -1   45.20    3.60
   8   4   1   49.30    4.10
   8   4   1   38.30    4.40
   8   4   1   47.50    8.30
  -9  -4  -1    2.20    1.80
  -9  -4  -1    1.40    1.00
  -9  -4  -1    0.40    1.60
  -9  -4  -1    2.40    2.90
   9   4   1   -0.60    1.30
   9   4   1    0.40    2.00
   9   4   1    0.00    4.40
 -10  -4  -1    2.00    2.80
 -10  -4  -1    0.60    1.00
 -10  -4  -1   -0.10    1.50
  10   4   1    1.00    3.70
  10   4   1    5.10    2.40
  10   4   1    1.50    1.60
 -11  -4  -1    5.10    2.60
 -11  -4  -1   11.10    2.80
 -11  -4  -1    7.80    4.00
 -11  -4  -1   13.30    1.90
  11   4   1   11.50    3.50
  11   4   1    4.60    4.60
  11   4   1   15.90    3.30
 -12  -4  -1   -1.90    1.50
 -12  -4  -1   -1.60    2.90
 -12  -4  -1   -2.90    1.00
  12   4   1    3.20    4.30
  12   4   1    0.60    1.90
 -13  -4  -1   27.80    3.70
 -13  -4  -1   10.30    5.00
 -13  -4  -1   27.90    4.50
  13   4   1   26.50    4.50
  13   4   1   28.80    7.40
  15  -5  -1    2.60    1.20
  15  -5  -1    6.40    3.90
  15  -5  -1    2.00    3.00
  15  -5  -1    2.70    2.10
 -15   5   1    4.60    5.60
 -15   5   1    0.60    2.40
 -15   5   1    3.20    2.60
  14  -5  -1   71.89    3.50
  14  -5  -1   72.89    5.50
  14  -5  -1   74.79    7.90
 -14   5   1   70.89    6.50
 -14   5   1   74.59    6.70
 -14   5   1   54.89   10.50
  13  -5  -1  142.19    8.50
  13  -5  -1  118.79    4.60
  13  -5  -1  129.09    7.00
  13  -5  -1  126.09    9.50
 -13   5   1  126.59   13.60
 -13   5   1  131.39    8.40
 -13   5   1  116.79    7.70
 -13   5   1  125.29    4.10
  12  -5  -1   -2.10    1.90
  12  -5  -1    0.10    1.40
  12  -5  -1   -0.80    0.90
  12  -5  -1    1.80    1.90
 -12   5   1    3.50    2.10
 -12   5   1   -1.40    3.00
 -12   5   1    0.30    2.00
  11  -5  -1    3.00    2.00
  11  -5  -1    3.70    1.80
  11  -5  -1    4.10    1.20
 -11   5   1    3.60    3.50
  10  -5  -1   23.00    1.90
  10  -5  -1   15.10    3.60
  10  -5  -1   25.80    3.70
  10  -5  -1   22.10    2.80
 -10   5   1   21.20    3.50
 -10   5   1   21.80    5.50
 -10   5   1   34.00    3.70
   9  -5  -1   11.80    2.50
   9  -5  -1    9.80    2.00
   9  -5  -1   10.20    1.30
   9  -5  -1    8.50    2.80
  -9   5   1   11.30    2.60
  -9   5   1   11.80    2.30
  -9   5   1   12.10    3.90
   8  -5  -1   54.99    3.70
   8  -5  -1   49.40    4.80
   8  -5  -1   49.70    3.90
   8  -5  -1   51.09    2.20
  -8   5   1   61.59    6.50
  -8   5   1   53.39    4.00
  -8   5   1   44.40    3.90
   7  -5  -1  103.09    6.00
   7  -5  -1  100.89    5.10
   7  -5  -1   99.59    3.10
   7  -5  -1   97.99    4.80
  -7   5   1   91.59    5.20
  -7   5   1   90.89    4.90
  -7   5   1  100.09    7.10
   6  -5  -1  517.55   14.80
   6  -5  -1  531.45   13.30
   6  -5  -1  530.25   13.50
  -6   5   1  538.25   13.50
  -6   5   1  535.05   16.30
  -6   5   1  532.15   14.20
   5  -5  -1  239.38    7.70
   5  -5  -1  228.48    8.40
   5  -5  -1  233.58    5.80
  -5   5   1  244.08    5.60
  -5   5   1  239.88    8.30
  -5   5   1  240.98    6.60
  -5   5   1  235.18    8.90
  -5   5   1  236.88    7.40
   4  -5  -1  295.27    8.70
   4  -5  -1  286.37    9.30
   4  -5  -1  296.07    6.40
  -4   5   1  311.07    6.80
  -4   5   1  299.57    7.10
  -4   5   1  289.57    8.20
  -4   5   1  301.67    9.70
  -4   5   1  295.37    9.20
   3  -5  -1  582.34   14.60
   3  -5  -1  617.44   12.60
   3  -5  -1  579.74   14.60
  -3   5   1  589.74   14.70
  -3   5   1  603.14   14.90
   2  -5  -1  405.96   11.10
   2  -5  -1  433.36    9.30
   2  -5  -1  424.56    9.70
   2  -5  -1  423.46   11.20
  -2   5   1  430.96    8.90
  -2   5   1  424.66   11.30
  -2   5   1  421.16   11.50
  -2   5   1  422.96    8.90
   1  -5  -1  198.88    6.70
   1  -5  -1  201.78    5.00
   1  -5  -1  187.28    6.80
  -1   5   1  203.38    6.80
  -1   5   1  202.08    5.30
  -1   5   1  196.18    4.80
  -1   5   1  191.28    7.00
   0  -5  -1   25.10    1.60
   0  -5  -1   24.00    2.30
   0  -5  -1   23.70    1.60
   0  -5  -1   24.10    2.60
   0   5   1   24.20    1.30
   0   5   1   23.70    2.80
   0   5   1   25.90    2.50
   0   5   1   25.60    1.90
  -1  -5  -1   19.20    1.50
  -1  -5  -1   22.30    2.20
  -1  -5  -1   16.80    3.10
   1   5   1   19.90    2.90
   1   5   1   20.80    3.20
   1   5   1   19.40    2.10
  -2  -5  -1  361.96    9.60
  -2  -5  -1  377.66    9.90
  -2  -5  -1  380.06   11.80
   2   5   1  361.86   12.60
   2   5   1  355.96   10.20
   2   5   1  369.96   10.40
   2   5   1  380.16    7.60
  -3  -5  -1  249.08    6.70
  -3  -5  -1  229.28    7.30
  -3  -5  -1  245.58    9.60
   3   5   1  244.58    8.10
   3   5   1  236.28    8.20
   3   5   1  233.98   10.60
  -4  -5  -1  336.17   12.30
  -4  -5  -1  316.27    9.20
   4   5   1  331.17   10.70
   4   5   1  316.27    9.90
   4   5   1  315.37   13.70
  -5  -5  -1   10.10    2.80
  -5  -5  -1    5.20    1.50
   5   5   1    4.50    1.70
   5   5   1    1.70    2.40
   5   5   1    1.90    1.30
  -6  -5  -1    5.90    1.50
  -6  -5  -1    2.40    2.10
   6   5   1    4.30    1.60
   6   5   1    7.50    3.80
  -7  -5  -1   30.20    1.80
  -7  -5  -1   34.80    3.20
  -7  -5  -1   27.70    5.00
   7   5   1   30.20    3.40
   7   5   1   31.60    6.60
  -8  -5  -1  158.48    7.00
  -8  -5  -1  171.68   11.00
  -8  -5  -1  171.08    6.70
   8   5   1  166.58    7.90
   8   5   1  160.78   13.00
  -9  -5  -1    1.40    0.80
  -9  -5  -1   -1.10    1.20
  -9  -5  -1   -0.20    1.80
   9   5   1    1.10    1.30
   9   5   1    1.10    1.50
   9   5   1   -2.90    3.20
 -10  -5  -1    3.90    2.80
 -10  -5  -1    2.40    1.50
  10   5   1    3.40    3.90
  10   5   1    2.20    1.80
  10   5   1    2.40    3.00
 -11  -5  -1   33.10    2.50
 -11  -5  -1   26.80    6.30
 -11  -5  -1   32.20    4.20
  11   5   1   29.30    7.60
  11   5   1   37.00    4.60
 -12  -5  -1   30.40    4.30
 -12  -5  -1   27.50    2.40
 -12  -5  -1   15.00    5.10
  12   5   1   24.80    4.50
  12   5   1   13.10    5.70
 -13  -5  -1    3.60    1.40
 -13  -5  -1   10.30    5.30
 -13  -5  -1    6.20    2.70
  13   5   1    4.80    5.70
  13   5   1    4.90    2.50
  15  -6  -1   -1.90    1.70
  15  -6  -1    4.30    2.60
  15  -6  -1    2.50    3.20
 -15   6   1   -1.30    2.80
 -15   6   1    0.50    5.80
 -15   6   1   -0.70    2.30
  14  -6  -1    1.10    2.20
  14  -6  -1    1.80    1.80
  14  -6  -1    1.70    1.00
  14  -6  -1    0.20    2.50
 -14   6   1    0.60    2.50
 -14   6   1   -9.20    4.00
 -14   6   1    0.30    1.00
 -14   6   1    2.90    2.40
  13  -6  -1   11.30    2.70
  13  -6  -1    5.10    3.20
  13  -6  -1    9.60    1.40
  13  -6  -1    8.70    3.10
 -13   6   1    6.80    4.90
 -13   6   1    5.10    1.20
 -13   6   1    5.20    2.60
 -13   6   1    6.40    2.80
  12  -6  -1   71.69    5.10
  12  -6  -1   54.79   11.00
  12  -6  -1   65.79    5.60
  12  -6  -1   65.29    2.90
 -12   6   1   69.19    5.70
 -12   6   1   67.69    6.10
 -12   6   1   56.49    9.40
  11  -6  -1    7.00    1.20
  11  -6  -1   10.60    2.40
  11  -6  -1    6.50    3.70
  11  -6  -1    8.40    2.60
 -11   6   1   13.90    3.20
 -11   6   1    8.10    2.30
 -11   6   1    2.70    3.20
  10  -6  -1    3.40    0.90
  10  -6  -1    4.20    2.00
  10  -6  -1    2.60    2.30
  10  -6  -1    3.20    1.60
 -10   6   1    7.80    2.40
 -10   6   1    3.50    2.20
 -10   6   1    3.20    3.50
   9  -6  -1   35.80    5.00
   9  -6  -1   27.40    3.60
   9  -6  -1   32.30    3.30
   9  -6  -1   28.10    2.60
  -9   6   1   29.50    4.10
  -9   6   1   29.60    5.60
  -9   6   1   26.70    3.30
   8  -6  -1   25.30    3.00
   8  -6  -1   27.70    4.10
   8  -6  -1   25.20    2.80
  -8   6   1   15.70    2.80
  -8   6   1   25.30    3.50
  -8   6   1   20.50    4.50
   7  -6  -1   63.59    4.10
   7  -6  -1   65.99    5.00
   7  -6  -1   67.89    4.20
  -7   6   1   69.49    5.90
  -7   6   1   71.09    4.20
  -7   6   1   67.59    4.70
   6  -6  -1   92.69    3.30
   6  -6  -1   93.89    4.80
   6  -6  -1  104.79    5.80
  -6   6   1   87.09    5.20
  -6   6   1   93.89    6.10
  -6   6   1   95.69    4.60
  -6   6   1   89.29    3.70
   5  -6  -1   10.20    1.10
   5  -6  -1   10.50    1.90
   5  -6  -1    7.00    1.90
  -5   6   1    8.30    1.70
  -5   6   1    7.00    1.00
  -5   6   1    7.70    1.90
  -5   6   1    8.50    2.20
   4  -6  -1    5.10    1.60
   4  -6  -1    8.20    1.80
  -4   6   1    5.20    1.60
  -4   6   1    6.60    1.70
  -4   6   1    6.70    1.10
  -4   6   1    6.50    1.80
   3  -6  -1   81.59    4.60
   3  -6  -1   82.99    3.30
   3  -6  -1   75.99    4.20
   3  -6  -1   79.19    3.30
  -3   6   1   78.99    2.80
  -3   6   1   75.59    4.60
  -3   6   1   78.19    4.40
  -3   6   1   80.79    2.80
   2  -6  -1    1.80    1.30
   2  -6  -1    3.10    1.40
   2  -6  -1    3.30    0.90
  -2   6   1    2.20    0.80
  -2   6   1    1.10    1.20
  -2   6   1    2.80    0.80
  -2   6   1    2.40    1.30
  -2   6   1    2.80    0.70
   1  -6  -1    4.10    1.40
   1  -6  -1    6.70    1.10
   1  -6  -1    6.20    1.70
  -1   6   1    6.10    0.90
  -1   6   1    6.10    1.80
  -1   6   1    5.30    1.10
  -1   6   1    3.30    1.40
   0  -6  -1  559.14   11.60
   0  -6  -1  536.85   14.70
   0  -6  -1  552.84   13.90
   0  -6  -1  573.74   11.90
   0   6   1  550.94   14.30
   0   6   1  554.54   15.30
   0   6   1  560.44   12.70
  -1  -6  -1   64.19    4.40
  -1  -6  -1   69.99    3.80
   1   6   1   64.19    4.80
   1   6   1   66.49    4.10
  -2  -6  -1    2.90    1.20
  -2  -6  -1    1.80    1.50
  -2  -6  -1    1.60    0.80
   2   6   1    0.30    1.00
   2   6   1    1.10    0.90
   2   6   1    1.10    0.50
   2   6   1    0.60    1.50
  -3  -6  -1   14.90    1.60
  -3  -6  -1   14.50    2.80
  -3  -6  -1   11.90    1.90
   3   6   1   11.40    3.10
   3   6   1   17.30    2.80
   3   6   1   12.70    2.20
  -4  -6  -1   19.20    2.50
  -4  -6  -1   20.30    2.00
  -4  -6  -1   22.00    3.80
   4   6   1   19.20    2.90
   4   6   1   14.50    2.50
   4   6   1   10.90    3.50
  -5  -6  -1    6.00    1.40
  -5  -6  -1    5.90    1.60
  -5  -6  -1    7.60    2.60
   5   6   1    1.60    2.80
   5   6   1    1.60    1.40
   5   6   1    7.00    2.20
  -6  -6  -1   11.50    2.20
  -6  -6  -1   11.20    3.30
   6   6   1    4.30    3.60
   6   6   1    7.70    2.30
   6   6   1    7.50    2.10
  -7  -6  -1    2.40    2.40
  -7  -6  -1    0.80    1.40
   7   6   1   -2.40    2.80
   7   6   1    1.50    1.70
  -8  -6  -1   20.80    4.90
   8   6   1   19.00    6.30
   8   6   1   24.90    3.70
  -9  -6  -1    0.60    1.50
  -9  -6  -1    0.60    2.20
   9   6   1   -0.90    3.60
   9   6   1   -0.60    1.60
   9   6   1    1.50    1.80
 -10  -6  -1   24.70    3.60
 -10  -6  -1   23.00    5.50
  10   6   1   13.40    5.70
  10   6   1   17.70    3.80
 -11  -6  -1   39.40    6.80
 -11  -6  -1   40.80    4.40
  11   6   1   35.90    5.20
  11   6   1   25.00    7.30
 -12  -6  -1    1.10    2.00
 -12  -6  -1    2.00    4.00
 -12  -6  -1    8.10    3.00
  12   6   1   -5.20    4.50
  12   6   1    1.80    2.50
  15  -7  -1   -1.80    2.90
  15  -7  -1    3.40    2.50
 -15   7   1   -1.60    6.00
 -15   7   1    4.50    4.90
 -15   7   1   -0.30    2.70
 -15   7   1    0.90    1.00
  14  -7  -1   35.40    4.30
  14  -7  -1   36.70    6.50
  14  -7  -1   38.70    5.80
 -14   7   1   68.99   11.60
 -14   7   1   27.10    4.30
 -14   7   1   35.50    5.80
 -14   7   1   30.50    2.50
  13  -7  -1   44.90    6.50
  13  -7  -1   60.29    5.00
  13  -7  -1   52.19    5.30
 -13   7   1   55.39    5.40
 -13   7   1   50.69    5.80
 -13   7   1   51.69    9.80
  12  -7  -1   44.20    4.80
  12  -7  -1   31.10    7.20
  12  -7  -1   41.20    4.10
 -12   7   1   39.20    8.10
 -12   7   1   47.00    5.80
 -12   7   1   38.80    4.50
  11  -7  -1   -1.80    1.30
  11  -7  -1    2.00    2.10
  11  -7  -1   -0.10    1.60
 -11   7   1   -1.60    2.70
 -11   7   1    1.80    1.60
 -11   7   1   -0.60    1.90
  10  -7  -1   84.79    5.70
  10  -7  -1   85.69    6.70
  10  -7  -1   85.89    5.20
 -10   7   1   91.29    6.60
 -10   7   1   85.09    8.90
 -10   7   1   83.89    5.60
   9  -7  -1   78.89    6.10
   9  -7  -1   72.29    4.70
   9  -7  -1   77.49    5.10
  -9   7   1   77.59    7.60
  -9   7   1   77.99    5.70
  -9   7   1   74.39    5.00
   8  -7  -1    9.20    2.50
   8  -7  -1    9.60    1.50
   8  -7  -1   11.00    2.30
  -8   7   1   10.40    2.60
  -8   7   1    6.20    2.90
  -8   7   1    9.10    2.20
  -8   7   1    8.90    1.70
   7  -7  -1   57.09    4.00
   7  -7  -1   63.79    5.00
  -7   7   1   60.89    4.00
  -7   7   1   61.29    5.60
  -7   7   1   52.89    4.50
   6  -7  -1    5.50    1.00
   6  -7  -1    6.40    2.10
   6  -7  -1    6.30    1.80
  -6   7   1    4.10    1.90
  -6   7   1    5.30    1.10
  -6   7   1    7.10    2.30
  -6   7   1    5.90    1.60
   5  -7  -1  126.19    5.80
   5  -7  -1  122.79    6.30
  -5   7   1  121.79    4.90
  -5   7   1  120.19    6.50
  -5   7   1  126.29    6.50
  -5   7   1  126.29    5.40
   4  -7  -1    0.20    1.10
   4  -7  -1    1.60    1.30
  -4   7   1   -0.10    0.80
  -4   7   1    0.30    1.10
  -4   7   1    0.40    0.60
  -4   7   1    0.00    1.20
  -4   7   1   -0.60    0.60
   3  -7  -1  122.79    5.80
   3  -7  -1  125.99    4.40
   3  -7  -1  123.89    6.00
   3  -7  -1  128.59    4.50
  -3   7   1  123.29    4.00
  -3   7   1  117.39    5.90
  -3   7   1  127.99    6.30
  -3   7   1  125.49    3.60
   2  -7  -1   46.40    2.50
   2  -7  -1   45.00    3.60
   2  -7  -1   43.40    3.50
  -2   7   1   46.50    2.10
  -2   7   1   44.10    3.60
  -2   7   1   45.20    2.40
  -2   7   1   45.70    4.00
   1  -7  -1  342.87    8.00
   1  -7  -1  353.26   11.10
   1  -7  -1  339.57   10.40
  -1   7   1  346.87    7.50
  -1   7   1  347.97    8.80
  -1   7   1  346.87   10.80
  -1   7   1  352.36   11.50
   0  -7  -1    1.60    1.30
   0  -7  -1    4.50    0.90
   0  -7  -1    3.50    1.40
   0  -7  -1    3.00    0.90
   0   7   1    2.50    1.50
   0   7   1    4.60    1.90
   0   7   1    3.30    1.20
  -1  -7  -1    1.40    0.80
  -1  -7  -1    1.20    1.30
  -1  -7  -1    1.50    1.20
   1   7   1    2.30    1.20
   1   7   1    2.50    1.20
   1   7   1    2.20    1.30
   1   7   1    0.60    1.50
  -2  -7  -1   28.30    2.10
  -2  -7  -1   30.90    3.50
  -2  -7  -1   29.20    2.90
   2   7   1   29.00    1.50
   2   7   1   27.90    2.90
   2   7   1   39.30    5.40
   2   7   1   31.10    3.20
  -3  -7  -1   17.10    1.90
  -3  -7  -1   16.30    3.10
  -3  -7  -1   17.00    2.40
   3   7   1   18.60    3.00
   3   7   1   27.00    4.80
   3   7   1   16.60    2.70
  -4  -7  -1    5.60    1.30
  -4  -7  -1    4.10    2.10
  -4  -7  -1    3.40    1.50
   4   7   1    1.80    2.70
   4   7   1    4.00    1.70
   4   7   1    1.80    1.40
  -5  -7  -1    1.80    1.30
  -5  -7  -1    2.10    1.10
  -5  -7  -1    2.10    2.00
   5   7   1    1.90    1.60
   5   7   1    7.80    3.60
   5   7   1    2.50    1.60
  -6  -7  -1   21.30    2.50
  -6  -7  -1   17.30    2.60
  -6  -7  -1   19.40    4.10
   6   7   1   15.60    4.90
   6   7   1   24.90    3.70
   6   7   1   19.70    3.40
  -7  -7  -1   15.20    2.60
  -7  -7  -1   20.40    4.60
  -7  -7  -1   11.20    2.20
   7   7   1   12.30    2.90
   7   7   1   20.40    6.50
  -8  -7  -1   32.90    5.80
  -8  -7  -1   30.70    3.50
  -8  -7  -1   34.60    3.40
   8   7   1   36.50    8.70
   8   7   1   35.20    4.20
  -9  -7  -1    1.40    1.70
  -9  -7  -1   -0.90    2.10
  -9  -7  -1    2.90    1.70
   9   7   1   -1.00    1.60
   9   7   1    0.60    1.50
   9   7   1   -1.40    3.70
 -10  -7  -1    1.30    1.70
 -10  -7  -1    0.10    2.40
 -10  -7  -1    1.30    1.60
  10   7   1    1.30    2.00
  10   7   1    5.40    5.00
 -11  -7  -1    0.40    2.20
 -11  -7  -1    0.60    3.20
 -11  -7  -1    2.00    1.50
  11   7   1    7.90    8.80
  11   7   1    0.40    2.20
 -12  -7  -1    3.00    2.40
 -12  -7  -1   -4.50    3.30
  12   7   1   -9.50    5.80
  15  -8  -1    0.20    1.70
  15  -8  -1   -0.30    2.30
  15  -8  -1   -0.30    2.90
 -15   8   1   15.50    7.10
 -15   8   1   -0.40    4.40
 -15   8   1    4.60    3.60
  14  -8  -1    7.40    2.50
  14  -8  -1    2.70    3.00
  14  -8  -1    7.60    3.20
 -14   8   1    5.20    5.00
 -14   8   1    9.70    4.80
 -14   8   1   10.30    3.20
  13  -8  -1    1.00    1.70
  13  -8  -1    0.10    2.60
  13  -8  -1    1.00    1.80
 -13   8   1    0.40    1.80
 -13   8   1   -2.50    3.20
 -13   8   1    0.60    2.50
  12  -8  -1    7.40    3.00
  12  -8  -1    5.40    2.00
  12  -8  -1    6.90    2.50
 -12   8   1    6.70    2.30
 -12   8   1    0.60    3.60
 -12   8   1    6.00    2.90
  11  -8  -1    0.40    1.20
  11  -8  -1    2.20    1.80
  11  -8  -1   -0.50    2.00
 -11   8   1    2.90    1.90
 -11   8   1    3.70    3.30
  10  -8  -1    1.70    1.50
  10  -8  -1    2.50    1.30
  10  -8  -1    3.20    2.40
 -10   8   1    4.30    2.30
 -10   8   1    3.60    3.30
 -10   8   1    3.30    1.80
   9  -8  -1  265.67   11.60
   9  -8  -1  273.97    9.90
   9  -8  -1  266.87    7.60
  -9   8   1  271.67   11.40
  -9   8   1  258.87   13.60
  -9   8   1  261.87    9.70
   8  -8  -1   92.29    3.70
   8  -8  -1  103.89    5.60
   8  -8  -1   87.69    6.40
  -8   8   1   91.49    7.40
  -8   8   1  102.49    6.60
  -8   8   1   93.19    5.30
   7  -8  -1   41.50    4.40
   7  -8  -1   34.80    3.40
   7  -8  -1   39.10    2.10
  -7   8   1   37.30    4.70
  -7   8   1   38.20    4.10
   6  -8  -1   28.90    3.60
   6  -8  -1   29.30    3.20
  -6   8   1   27.20    2.90
  -6   8   1   35.50    3.80
  -6   8   1   28.60    2.10
  -6   8   1   36.90    4.30
   5  -8  -1    3.30    1.80
   5  -8  -1    4.40    1.70
  -5   8   1    5.50    2.00
  -5   8   1    4.40    1.20
  -5   8   1    8.30    1.90
  -5   8   1    0.90    1.40
   4  -8  -1   15.20    2.70
   4  -8  -1   17.50    2.80
   4  -8  -1   15.40    1.90
  -4   8   1    9.70    1.50
  -4   8   1   13.20    2.60
  -4   8   1   14.50    2.20
  -4   8   1   12.90    1.30
  -4   8   1   14.70    2.90
   3  -8  -1    0.60    1.30
   3  -8  -1    0.00    1.00
   3  -8  -1   -0.20    0.70
   3  -8  -1    0.30    0.70
  -3   8   1    2.20    1.40
  -3   8   1   -1.10    0.60
  -3   8   1   -0.40    1.20
  -3   8   1   -0.30    0.60
   2  -8  -1   45.10    3.80
   2  -8  -1   44.40    3.80
  -2   8   1   45.50    4.20
  -2   8   1   40.40    2.60
  -2   8   1   43.40    2.00
  -2   8   1   44.30    3.80
   1  -8  -1   60.09    4.60
   1  -8  -1   61.89    4.30
   1  -8  -1   62.69    2.70
  -1   8   1   58.09    3.30
  -1   8   1   64.99    4.50
  -1   8   1   56.69    4.80
   0  -8  -1   40.10    3.50
   0  -8  -1   40.90    2.40
   0  -8  -1   41.60    4.00
   0   8   1   45.10    3.90
   0   8   1   38.40    2.90
   0   8   1   43.60    4.30
  -1  -8  -1   48.40    3.70
  -1  -8  -1   54.29    4.60
  -1  -8  -1   48.70    2.60
  -1  -8  -1   50.69    2.80
   1   8   1   49.90    4.10
   1   8   1   53.49    3.60
   1   8   1   51.69    3.80
   1   8   1   56.89    5.20
  -2  -8  -1   62.59    3.10
  -2  -8  -1   61.89    4.10
  -2  -8  -1   66.49    5.20
   2   8   1   66.89    4.50
   2   8   1   63.49    6.00
   2   8   1   65.49    4.20
   2   8   1   59.99    2.30
   2   8   1   62.99    4.70
  -3  -8  -1   -0.60    1.30
  -3  -8  -1    0.00    1.00
  -3  -8  -1   -0.80    0.70
   3   8   1    0.50    1.20
   3   8   1    1.90    2.10
   3   8   1    0.80    1.40
  -4  -8  -1  100.89    7.00
  -4  -8  -1   87.69    4.20
  -4  -8  -1   92.99    5.20
   4   8   1   78.99    5.60
   4   8   1   84.59    5.70
   4   8   1   96.99    8.40
  -5  -8  -1   33.60    2.80
  -5  -8  -1   28.40    3.30
  -5  -8  -1   27.70    4.70
   5   8   1   29.40    6.10
   5   8   1   32.00    3.80
   5   8   1   23.90    3.60
  -6  -8  -1  104.59    5.20
  -6  -8  -1   99.99    5.60
  -6  -8  -1   96.39    7.70
   6   8   1  103.39    6.80
   6   8   1   86.59   16.00
  -7  -8  -1    3.30    1.90
  -7  -8  -1   -0.10    2.10
   7   8   1   -0.30    1.60
   7   8   1   -0.20    3.90
   7   8   1    1.50    1.80
  -8  -8  -1   16.50    4.30
  -8  -8  -1   16.60    2.70
   8   8   1   16.80    6.30
   8   8   1   19.30    3.70
  -9  -8  -1    2.70    1.60
  -9  -8  -1    3.80    3.30
  -9  -8  -1    1.10    1.80
   9   8   1    2.40    3.70
   9   8   1    2.70    2.20
   9   8   1    0.40    2.10
 -10  -8  -1    0.00    1.30
 -10  -8  -1    1.90    1.70
 -10  -8  -1    1.00    2.90
  10   8   1   -1.30    1.70
 -11  -8  -1   -1.30    2.20
 -11  -8  -1    1.90    5.10
 -11  -8  -1   -1.60    1.40
  11   8   1    2.60    2.20
  11   8   1    9.10    6.30
  15  -9  -1    2.80    2.10
  15  -9  -1    2.70    2.30
  15  -9  -1    4.20    3.20
 -15   9   1    1.70    1.30
 -15   9   1    0.30    2.70
  14  -9  -1    2.70    3.10
  14  -9  -1    3.80    1.90
 -14   9   1    5.70    2.30
 -14   9   1   -6.80    4.00
 -14   9   1    5.00    3.50
  13  -9  -1   -0.10    1.60
  13  -9  -1    2.90    1.50
  13  -9  -1    2.80    2.50
 -13   9   1    5.60    4.00
 -13   9   1    1.60    2.40
 -13   9   1    5.30    2.30
  12  -9  -1   -1.30    1.10
  12  -9  -1    2.20    2.60
  12  -9  -1    2.50    1.70
 -12   9   1    7.20    4.40
 -12   9   1    7.00    2.80
 -12   9   1    0.10    1.70
  11  -9  -1   23.80    3.60
  11  -9  -1   25.60    2.40
  11  -9  -1   27.40    4.90
 -11   9   1   21.20    4.30
 -11   9   1   24.30    4.00
  10  -9  -1  284.67    7.90
  10  -9  -1  243.58   17.80
 -10   9   1  262.17   10.20
 -10   9   1  280.47   12.30
 -10   9   1  276.67   15.30
   9  -9  -1   86.29    6.70
   9  -9  -1   78.59    3.40
   9  -9  -1   74.19    5.30
  -9   9   1   76.99    5.10
  -9   9   1   81.39    7.80
   8  -9  -1    1.30    1.50
   8  -9  -1    2.40    2.00
  -8   9   1    4.10    2.30
  -8   9   1    3.10    2.40
  -8   9   1    0.80    1.40
   7  -9  -1    1.20    1.80
   7  -9  -1    3.70    1.80
  -7   9   1    3.30    1.10
  -7   9   1    2.90    2.20
  -7   9   1    6.10    1.90
  -7   9   1    2.80    1.90
   6  -9  -1   19.50    3.10
   6  -9  -1   27.10    4.10
  -6   9   1   21.60    2.10
  -6   9   1   26.50    2.90
  -6   9   1   25.80    4.20
  -6   9   1   20.90    3.60
   5  -9  -1   -1.30    1.20
   5  -9  -1   -0.50    1.00
   5  -9  -1   -0.50    0.90
  -5   9   1    0.10    1.50
  -5   9   1   -0.10    1.10
  -5   9   1    1.50    1.60
  -5   9   1   -0.20    0.70
  -5   9   1   -0.30    0.60
   4  -9  -1   25.10    3.10
   4  -9  -1   21.80    2.20
   4  -9  -1   19.50    3.10
  -4   9   1   20.00    2.20
  -4   9   1   23.20    3.70
  -4   9   1   22.20    1.40
  -4   9   1   22.60    1.90
  -4   9   1   22.50    3.50
   3  -9  -1   10.00    2.50
   3  -9  -1    9.20    1.60
   3  -9  -1    9.40    1.70
   3  -9  -1   11.20    2.60
  -3   9   1    9.10    2.50
  -3   9   1    9.30    1.30
  -3   9   1    7.10    2.20
  -3   9   1   11.30    1.70
   2  -9  -1    0.90    1.20
   2  -9  -1    1.80    1.50
  -2   9   1    0.80    1.30
  -2   9   1    7.40    2.30
  -2   9   1    3.20    1.20
   1  -9  -1   45.60    2.30
   1  -9  -1   41.70    3.90
   1  -9  -1   42.60    4.20
  -1   9   1   41.40    4.00
  -1   9   1   41.70    3.00
  -1   9   1   46.10    4.60
   0  -9  -1   43.90    3.90
   0  -9  -1   37.60    4.00
   0  -9  -1   43.40    3.90
   0   9   1   46.30    3.60
   0   9   1   43.70    4.00
   0   9   1   43.50    3.30
   0   9   1   44.70    4.70
  -1  -9  -1    1.00    1.40
  -1  -9  -1    0.40    0.80
  -1  -9  -1    0.20    0.80
  -1  -9  -1   -0.30    1.20
   1   9   1   -0.50    1.10
   1   9   1    0.10    1.70
   1   9   1    0.90    1.40
   1   9   1    0.60    1.10
  -2  -9  -1   83.09    5.10
  -2  -9  -1   86.39    3.80
  -2  -9  -1   85.69    6.10
   2   9   1   83.29    5.10
   2   9   1   87.89    5.40
   2   9   1   84.39    5.80
   2   9   1   87.29    2.90
   2   9   1   90.39    7.50
  -3  -9  -1  227.68   10.70
  -3  -9  -1  240.68    8.90
  -3  -9  -1  233.58    7.30
   3   9   1  235.48   10.00
   3   9   1  241.78    9.80
   3   9   1  251.57   13.10
   3   9   1  240.78    9.40
  -4  -9  -1    4.40    2.40
  -4  -9  -1    3.60    1.70
  -4  -9  -1    7.30    1.70
   4   9   1    3.50    2.10
   4   9   1    0.00    2.50
   4   9   1    4.40    2.40
  -5  -9  -1  194.08   10.80
  -5  -9  -1  206.08    8.40
  -5  -9  -1  188.98    7.10
   5   9   1  189.38   13.40
   5   9   1  200.18    9.60
  -6  -9  -1   27.30    5.00
  -6  -9  -1   28.80    2.90
   6   9   1   28.30    4.40
   6   9   1   25.00    4.20
   6   9   1   27.40    6.90
  -7  -9  -1    3.20    2.60
  -7  -9  -1    1.50    1.40
  -7  -9  -1    3.50    1.90
   7   9   1    1.30    2.10
   7   9   1   -5.50    2.90
   7   9   1   -0.30    1.80
  -8  -9  -1    4.70    2.30
  -8  -9  -1    3.70    2.70
  -8  -9  -1    6.70    2.20
   8   9   1    9.40    5.30
   8   9   1    6.70    2.60
   8   9   1    7.60    3.20
  -9  -9  -1    0.70    3.10
  -9  -9  -1    6.30    2.20
  -9  -9  -1    3.70    1.70
   9   9   1   13.50    5.30
   9   9   1    7.80    3.00
 -10  -9  -1    2.40    1.80
 -10  -9  -1    4.30    2.30
 -10  -9  -1   -2.40    2.70
  10   9   1   -1.30    5.00
 -11  -9  -1    1.10    1.90
 -11  -9  -1    0.40    2.40
 -11  -9  -1    1.50    3.20
  11   9   1   -1.50    3.00
  14 -10  -1    1.30    3.20
  14 -10  -1    1.60    1.60
 -14  10   1    6.40    2.70
 -14  10   1    5.10    5.80
 -14  10   1   -0.60    2.70
  13 -10  -1    6.00    2.20
  13 -10  -1    8.10    1.80
  13 -10  -1    8.70    3.50
 -13  10   1    0.70    2.80
 -13  10   1    7.90    2.50
 -13  10   1    8.40    4.90
  12 -10  -1   13.30    3.00
  12 -10  -1   14.00    2.00
  12 -10  -1   16.50    4.20
 -12  10   1    9.10    2.60
 -12  10   1    8.40    3.20
 -12  10   1    7.70    4.20
  11 -10  -1    7.70    1.50
  11 -10  -1   12.90    2.80
 -11  10   1    8.60    4.10
 -11  10   1    9.70    3.40
 -11  10   1    6.20    2.70
  10 -10  -1   12.00    3.50
  10 -10  -1    2.40    1.80
 -10  10   1    7.60    3.10
 -10  10   1    9.90    3.80
 -10  10   1    3.70    1.90
   9 -10  -1    1.00    2.00
   9 -10  -1    2.10    2.20
  -9  10   1    1.20    2.20
  -9  10   1    5.40    2.00
   8 -10  -1    2.30    1.60
   8 -10  -1    1.30    2.00
  -8  10   1    0.20    1.30
  -8  10   1    2.70    2.90
  -8  10   1    2.60    2.30
   7 -10  -1    4.30    2.00
   7 -10  -1    9.00    2.70
  -7  10   1    1.10    1.50
  -7  10   1    4.40    2.40
  -7  10   1    0.90    1.80
  -7  10   1    3.00    1.20
   6 -10  -1   11.90    2.20
   6 -10  -1   12.60    2.70
   6 -10  -1    7.10    2.50
  -6  10   1   12.50    1.70
  -6  10   1    3.40    2.30
  -6  10   1   12.10    3.20
  -6  10   1    8.40    2.20
  -6  10   1    7.40    1.50
   5 -10  -1   29.50    4.40
   5 -10  -1   31.80    3.80
   5 -10  -1   29.80    2.80
  -5  10   1   33.20    2.70
  -5  10   1   36.10    4.30
  -5  10   1   43.90    4.70
  -5  10   1   34.60    3.40
   4 -10  -1  320.27   11.60
   4 -10  -1  319.37    9.10
   4 -10  -1  342.57   12.30
  -4  10   1  341.17   12.90
  -4  10   1  321.47    8.20
  -4  10   1  321.17    8.70
  -4  10   1  319.27    9.20
  -4  10   1  325.07   12.40
   3 -10  -1   28.00    3.90
   3 -10  -1   21.00    2.40
   3 -10  -1   25.30    3.80
  -3  10   1   20.00    2.20
  -3  10   1   14.20    3.00
  -3  10   1   18.50    3.70
   2 -10  -1    0.80    1.50
   2 -10  -1    0.80    1.40
  -2  10   1   -0.30    1.30
  -2  10   1   -0.50    0.90
  -2  10   1   -1.20    1.30
   1 -10  -1   78.79    5.70
   1 -10  -1   79.29    5.30
   1 -10  -1   80.99    3.20
  -1  10   1   72.29    5.50
  -1  10   1   78.19    6.30
  -1  10   1   76.49    4.20
   0 -10  -1  215.18    9.70
   0 -10  -1  192.58    6.10
   0 -10  -1  214.88    8.90
   0  10   1  188.08   10.10
   0  10   1  191.98    7.30
   0  10   1  198.78    9.20
   0  10   1  192.28    7.90
  -1 -10  -1  118.79    6.40
  -1 -10  -1  126.19    7.60
  -1 -10  -1  106.49    4.60
  -1 -10  -1  102.59    5.90
   1  10   1  112.99    5.70
   1  10   1  110.69    6.10
   1  10   1  109.99    8.20
   1  10   1  114.59    6.90
  -2 -10  -1    3.80    1.70
  -2 -10  -1    2.60    1.20
  -2 -10  -1    4.50    1.30
  -2 -10  -1    3.40    2.10
   2  10   1    3.00    2.00
   2  10   1    3.60    0.90
   2  10   1    3.00    2.60
   2  10   1    5.80    1.90
   2  10   1    2.20    1.70
  -3 -10  -1    4.60    2.60
  -3 -10  -1    6.80    2.20
  -3 -10  -1    5.10    1.50
   3  10   1    3.10    1.80
   3  10   1    4.40    2.00
   3  10   1    5.50    3.40
   3  10   1    3.20    2.80
  -4 -10  -1    4.10    2.40
  -4 -10  -1    1.90    1.60
  -4 -10  -1    0.10    1.00
   4  10   1   -0.80    1.30
   4  10   1    2.50    1.90
   4  10   1   -0.10    1.60
   4  10   1    3.80    3.00
  -5 -10  -1  280.57    9.20
  -5 -10  -1  299.77   13.80
   5  10   1  276.57   12.00
   5  10   1  298.17   13.20
   5  10   1  298.67   22.30
  -6 -10  -1   59.09    6.40
  -6 -10  -1   53.99    4.00
  -6 -10  -1   53.59    4.60
   6  10   1   47.90    5.50
   6  10   1   60.19    9.60
  -7 -10  -1    1.30    1.30
  -7 -10  -1    1.60    2.40
  -7 -10  -1    2.60    1.90
   7  10   1    2.90    2.40
   7  10   1    1.70    1.90
   7  10   1   -0.50    3.80
  -8 -10  -1    2.90    2.20
  -8 -10  -1    5.30    3.10
  -8 -10  -1    2.10    1.50
   8  10   1    1.30    2.00
   8  10   1    2.70    3.90
  -9 -10  -1    4.50    2.00
  -9 -10  -1    4.40    3.30
  -9 -10  -1    6.60    2.40
   9  10   1    1.20    5.40
   9  10   1    8.40    2.90
 -10 -10  -1   27.70    4.50
 -10 -10  -1   28.80    4.30
 -10 -10  -1   24.40    5.30
  10  10   1   23.40    4.90
  14 -11  -1   49.30    5.00
  14 -11  -1   49.70    7.70
 -14  11   1   42.10    9.90
 -14  11   1   61.99    5.80
  13 -11  -1    9.80    4.00
  13 -11  -1    9.50    2.80
 -13  11   1   16.10    5.70
 -13  11   1   10.00    2.50
 -13  11   1   12.20    4.20
  12 -11  -1   10.20    2.80
  12 -11  -1   12.50    4.30
 -12  11   1    5.20    3.20
 -12  11   1    7.70    2.50
 -12  11   1    8.00    4.90
  11 -11  -1   40.80    6.00
  11 -11  -1   27.30    4.10
 -11  11   1   29.60    5.40
 -11  11   1   22.10    6.10
  10 -11  -1   11.20    2.90
  10 -11  -1   10.50    3.60
 -10  11   1   12.10    2.60
 -10  11   1    8.60    6.40
 -10  11   1    7.20    3.30
   9 -11  -1   45.90    6.50
   9 -11  -1   41.40    4.40
  -9  11   1   43.60    4.20
  -9  11   1   39.40    5.80
  -9  11   1   42.10    6.80
   8 -11  -1   25.90    4.50
  -8  11   1   26.80    2.50
  -8  11   1   32.50    5.20
  -8  11   1   27.60    5.20
  -8  11   1   32.60    3.40
   7 -11  -1    3.90    2.00
   7 -11  -1    2.40    2.20
   7 -11  -1    2.00    1.50
  -7  11   1    2.00    1.50
  -7  11   1    0.00    1.80
  -7  11   1    3.50    1.20
  -7  11   1    2.20    1.30
  -7  11   1    0.20    2.00
   6 -11  -1   20.90    4.10
   6 -11  -1   17.60    2.60
   6 -11  -1   24.20    3.80
  -6  11   1   18.20    3.90
  -6  11   1   14.70    2.20
  -6  11   1   11.50    3.10
  -6  11   1   20.60    3.10
   5 -11  -1  105.19    7.10
   5 -11  -1  116.19    7.00
   5 -11  -1  117.39    5.20
  -5  11   1  107.69    7.30
  -5  11   1  117.79    7.70
  -5  11   1  111.89    5.90
  -5  11   1  111.59    4.40
  -5  11   1  110.19    5.00
   4 -11  -1  512.85   13.10
   4 -11  -1  558.84   17.00
   4 -11  -1  543.25   13.20
   4 -11  -1  523.55   16.80
  -4  11   1  543.55   13.00
  -4  11   1  528.85   13.60
  -4  11   1  526.55   17.80
  -4  11   1  569.94   17.70
   3 -11  -1  260.97    8.50
   3 -11  -1  269.27   11.00
   3 -11  -1  262.37   11.00
  -3  11   1  260.17    8.20
  -3  11   1  266.47   11.90
  -3  11   1  271.57   11.30
   2 -11  -1   15.90    3.10
   2 -11  -1   12.10    3.00
  -2  11   1   15.70    2.30
  -2  11   1   15.70    3.70
  -2  11   1   11.30    3.00
   1 -11  -1    0.80    1.40
   1 -11  -1   -0.50    1.50
  -1  11   1   -1.10    1.30
  -1  11   1    0.70    1.90
   0 -11  -1  101.79    4.20
   0 -11  -1  113.79    6.60
   0 -11  -1  117.79    7.40
   0  11   1  111.09    8.10
   0  11   1  108.99    5.60
   0  11   1  104.89    7.00
   0  11   1  104.39    6.00
  -1 -11  -1   11.70    3.10
  -1 -11  -1    9.80    2.50
  -1 -11  -1   15.40    2.10
   1  11   1   10.00    2.80
   1  11   1   13.00    3.00
   1  11   1   14.40    2.80
   1  11   1   16.00    4.10
  -2 -11  -1    3.10    2.00
  -2 -11  -1    3.00    1.30
  -2 -11  -1    4.10    2.00
  -2 -11  -1    2.30    1.20
   2  11   1    2.30    1.90
   2  11   1    3.60    1.90
   2  11   1    2.80    2.00
   2  11   1    3.30    2.90
  -3 -11  -1    6.50    2.20
  -3 -11  -1    6.80    1.80
   3  11   1    7.40    2.70
   3  11   1    7.40    2.20
   3  11   1    5.90    3.30
   3  11   1    6.30    2.30
  -4 -11  -1  214.28    7.50
  -4 -11  -1  197.38   13.80
  -4 -11  -1  221.48   11.70
   4  11   1  229.08   11.00
   4  11   1  202.78   13.60
   4  11   1  237.88   15.10
   4  11   1  217.78    9.90
  -5 -11  -1    2.60    2.10
  -5 -11  -1    5.10    1.60
  -5 -11  -1    3.40    2.40
   5  11   1    2.00    1.60
   5  11   1    1.10    3.30
   5  11   1    4.20    2.30
  -6 -11  -1   14.50    4.40
  -6 -11  -1   14.60    3.00
  -6 -11  -1   10.90    2.10
   6  11   1    8.50    2.80
   6  11   1   10.90    3.00
   6  11   1   11.70    3.50
   6  11   1   11.90    5.30
  -7 -11  -1    0.90    1.40
  -7 -11  -1    2.80    2.80
  -7 -11  -1    3.00    2.20
   7  11   1   -2.10    1.70
   7  11   1   -2.60    3.50
   7  11   1   -2.60    3.30
  -8 -11  -1   11.00    3.00
  -8 -11  -1   11.10    4.20
  -8 -11  -1    5.40    2.10
   8  11   1    6.50    2.80
   8  11   1    6.30    6.00
  -9 -11  -1    1.40    2.30
  -9 -11  -1   -3.20    1.30
  -9 -11  -1   -0.20    2.70
   9  11   1   -7.50    6.10
   9  11   1    2.80    2.90
  13 -12  -1   18.90    5.00
  13 -12  -1    7.80    3.70
 -13  12   1   16.50    4.80
 -13  12   1    9.50    5.60
 -13  12   1   13.00    3.20
  12 -12  -1   60.19    5.40
  12 -12  -1   59.79    7.00
 -12  12   1   52.09    9.10
 -12  12   1   79.09   14.60
 -12  12   1   57.09    5.20
  11 -12  -1    9.40    3.60
  11 -12  -1    8.20    2.70
 -11  12   1    5.80    3.80
 -11  12   1    5.50    2.30
 -11  12   1    8.70    3.50
  10 -12  -1   40.40    4.50
  10 -12  -1   39.60    6.10
 -10  12   1   41.10    4.20
 -10  12   1   42.40    7.30
 -10  12   1   48.30    6.50
   9 -12  -1    7.80    2.60
   9 -12  -1    7.70    2.90
   9 -12  -1   10.80    2.50
  -9  12   1    8.60    3.30
  -9  12   1   13.10    6.00
  -9  12   1    9.40    2.60
   8 -12  -1    8.60    2.60
   8 -12  -1   12.60    4.20
   8 -12  -1    9.60    2.20
  -8  12   1   11.60    1.90
  -8  12   1   10.20    3.30
  -8  12   1   12.10    1.70
  -8  12   1   16.60    4.00
  -8  12   1   13.90    2.80
   7 -12  -1   46.70    4.80
   7 -12  -1   44.30    3.80
   7 -12  -1   46.10    5.50
  -7  12   1   45.60    4.00
  -7  12   1   55.99   10.40
  -7  12   1   45.60    5.50
  -7  12   1   49.00    3.40
   6 -12  -1   50.09    3.70
   6 -12  -1   45.20    5.20
   6 -12  -1   52.69    9.00
  -6  12   1   43.80    5.30
  -6  12   1   56.19    5.90
  -6  12   1   47.90    4.20
  -6  12   1   47.40    3.50
   5 -12  -1   12.90    3.20
   5 -12  -1   20.20    2.70
   5 -12  -1   19.40    3.60
  -5  12   1   20.00    4.20
  -5  12   1   23.00    3.50
  -5  12   1   22.90    4.20
  -5  12   1   23.60    2.70
   4 -12  -1   11.00    3.00
   4 -12  -1   15.70    3.40
  -4  12   1   12.40    2.00
  -4  12   1   10.30    3.20
  -4  12   1   11.10    2.20
  -4  12   1    8.00    2.80
   3 -12  -1    7.60    2.60
   3 -12  -1   11.60    2.20
   3 -12  -1   16.50    3.40
  -3  12   1   12.00    3.40
  -3  12   1   12.40    2.10
  -3  12   1   11.80    3.20
   2 -12  -1   34.70    5.00
   2 -12  -1   42.70    4.70
  -2  12   1   50.99    5.90
  -2  12   1   41.70    3.40
  -2  12   1   40.20    4.80
   1 -12  -1  114.19    7.10
   1 -12  -1  100.99    7.20
  -1  12   1  112.29    8.50
  -1  12   1  113.89    5.70
  -1  12   1  112.49    7.50
  -1  12   1  123.39    7.80
   0 -12  -1   12.50    3.30
   0 -12  -1    8.00    2.60
   0 -12  -1   13.50    1.80
   0  12   1   10.60    2.40
   0  12   1   13.00    2.80
   0  12   1   10.40    2.90
   0  12   1   10.90    3.70
  -1 -12  -1   63.29    5.40
  -1 -12  -1   72.49    3.80
   1  12   1   81.39    6.40
   1  12   1   68.29    5.30
   1  12   1   55.79    4.60
   1  12   1   61.99    7.10
  -2 -12  -1    2.70    1.30
  -2 -12  -1    4.10    2.20
  -2 -12  -1    2.70    1.20
  -2 -12  -1    1.20    2.00
   2  12   1    2.20    1.80
   2  12   1    2.80    2.10
   2  12   1    1.20    1.60
   2  12   1   -1.50    3.20
  -3 -12  -1   14.90    3.00
  -3 -12  -1   15.80    3.70
  -3 -12  -1   13.70    2.00
  -3 -12  -1   13.70    2.40
   3  12   1   14.80    3.10
   3  12   1   19.50    4.00
   3  12   1   18.50    5.00
   3  12   1    9.30    3.00
  -4 -12  -1    7.30    2.50
  -4 -12  -1    6.10    1.70
  -4 -12  -1    2.80    2.30
   4  12   1    1.70    3.70
   4  12   1    8.00    3.00
   4  12   1    6.00    2.40
   4  12   1    6.50    2.90
  -5 -12  -1    4.20    2.40
  -5 -12  -1    3.30    1.50
  -5 -12  -1   -0.70    2.40
   5  12   1    0.80    2.30
   5  12   1    1.00    4.00
   5  12   1    3.80    2.30
   5  12   1   -0.90    1.80
  -6 -12  -1   75.39    5.80
  -6 -12  -1   67.99    5.00
  -6 -12  -1   72.99    7.80
   6  12   1   80.09    7.30
   6  12   1   73.29    7.40
   6  12   1   78.39    6.90
   6  12   1   78.19   11.50
  -7 -12  -1   23.90    4.00
  -7 -12  -1   29.90    3.50
  -7 -12  -1   16.00    4.60
   7  12   1   27.20    5.20
   7  12   1   26.20    5.30
  -8 -12  -1    3.70    1.90
  -8 -12  -1    7.90    3.60
   8  12   1    1.50    2.40
   8  12   1    2.00    2.50
   8  12   1   -9.60    7.00
  13 -13  -1   -3.00    1.60
  13 -13  -1   -1.00    3.00
 -13  13   1    0.60    2.00
  12 -13  -1    2.00    2.60
 -12  13   1   10.40    4.40
 -12  13   1    6.60    2.40
 -12  13   1    9.10    3.80
  11 -13  -1    2.50    2.00
  11 -13  -1   -0.30    2.50
 -11  13   1    2.70    3.10
 -11  13   1    3.30    1.80
  10 -13  -1   49.10    5.10
  10 -13  -1   53.29    7.40
 -10  13   1   54.39    6.70
 -10  13   1   50.89    4.70
 -10  13   1   61.19    8.90
 -10  13   1   40.70    3.30
   9 -13  -1   23.90    4.20
   9 -13  -1   25.60    5.00
   9 -13  -1   26.50    3.70
  -9  13   1   22.00    4.50
  -9  13   1   16.20    4.50
  -9  13   1   18.40    2.00
  -9  13   1   19.80    3.30
   8 -13  -1    1.70    1.90
   8 -13  -1    2.40    2.50
   8 -13  -1    4.10    1.80
  -8  13   1    1.70    2.40
  -8  13   1    3.80    1.50
  -8  13   1   -0.60    1.40
   7 -13  -1    1.80    2.00
   7 -13  -1    2.10    1.50
   7 -13  -1    1.00    2.10
  -7  13   1    2.10    1.80
  -7  13   1    2.90    1.50
  -7  13   1    0.00    2.20
  -7  13   1    2.50    2.70
   6 -13  -1  109.69    5.30
   6 -13  -1  116.09    7.50
   6 -13  -1  112.69   10.60
  -6  13   1  114.79    4.50
  -6  13   1  112.99    8.30
  -6  13   1  114.09    8.60
  -6  13   1  116.69    5.60
  -6  13   1  113.09    6.40
   5 -13  -1    7.30    2.50
   5 -13  -1    5.10    2.60
  -5  13   1    2.30    2.20
  -5  13   1    6.60    2.20
  -5  13   1    4.10    2.70
  -5  13   1    3.60    1.60
   4 -13  -1   67.49    5.80
   4 -13  -1   71.79    6.20
  -4  13   1   59.69    3.80
  -4  13   1   58.79    4.20
  -4  13   1   59.29    5.90
   3 -13  -1    5.80    2.40
   3 -13  -1    1.40    1.80
   3 -13  -1    2.60    1.50
  -3  13   1    0.10    1.20
  -3  13   1    2.60    1.90
   2 -13  -1    1.00    1.70
   2 -13  -1    0.40    1.50
  -2  13   1    0.60    1.90
  -2  13   1    0.20    1.50
  -2  13   1    0.50    1.30
   1 -13  -1   -0.60    1.50
   1 -13  -1    3.50    2.30
  -1  13   1    2.00    1.60
  -1  13   1    3.20    3.00
  -1  13   1    2.70    1.80
  -1  13   1    1.40    1.90
   0 -13  -1  139.29    4.90
   0 -13  -1  125.79    8.50
   0 -13  -1  137.49    8.00
   0  13   1  136.79    6.70
   0  13   1  136.39    8.70
   0  13   1  139.59    7.50
   0  13   1  123.29    9.80
  -1 -13  -1   45.70    5.40
  -1 -13  -1   56.39    3.50
   1  13   1   44.60    7.10
   1  13   1   40.00    7.50
   1  13   1   53.99    5.70
   1  13   1   45.80    4.40
  -2 -13  -1    4.40    1.60
  -2 -13  -1    5.30    2.80
  -2 -13  -1    6.50    2.50
   2  13   1    7.60    3.80
   2  13   1    3.80    2.60
   2  13   1    7.80    2.70
   2  13   1    5.00    2.20
  -3 -13  -1   63.59    6.60
  -3 -13  -1   48.30    3.80
   3  13   1   59.09    5.70
   3  13   1   51.29    9.40
   3  13   1   47.90    5.60
   3  13   1   44.80    7.90
  -4 -13  -1   51.59    6.40
  -4 -13  -1   53.29    3.70
  -4 -13  -1   61.19    5.40
  -4 -13  -1   48.20    4.10
   4  13   1   48.60    5.70
   4  13   1   53.89    5.80
   4  13   1   52.89    9.50
   4  13   1   57.59    5.30
  -5 -13  -1   29.10    5.60
  -5 -13  -1   37.60    3.80
  -5 -13  -1   36.60    3.40
  -5 -13  -1   38.50    4.60
   5  13   1   29.00    7.10
   5  13   1   29.60    4.90
   5  13   1   27.60    5.10
   5  13   1   28.50    4.50
  -6 -13  -1    2.20    3.10
  -6 -13  -1    4.40    2.30
   6  13   1   -6.10    4.00
   6  13   1    1.20    2.70
   6  13   1   -0.10    2.20
  -7 -13  -1    4.70    1.80
  -7 -13  -1    2.40    3.10
  -7 -13  -1    4.20    2.90
   7  13   1   -0.30    2.20
   7  13   1    6.60    2.90
  12 -14  -1    2.50    1.90
  12 -14  -1   -0.40    3.40
 -12  14   1    1.10    1.90
 -12  14   1   -1.20    1.60
 -12  14   1    7.70    4.70
  11 -14  -1   -5.10    2.10
  11 -14  -1   -3.40    2.70
 -11  14   1   -0.60    3.70
 -11  14   1   -2.60    1.20
 -11  14   1    0.70    1.70
 -11  14   1    1.80    3.00
  10 -14  -1   -1.00    2.40
  10 -14  -1    5.40    2.40
 -10  14   1    4.90    4.40
 -10  14   1    3.90    2.20
 -10  14   1    8.20    3.90
   9 -14  -1   27.40    3.80
   9 -14  -1   30.00    4.80
   9 -14  -1   22.80    5.10
  -9  14   1   24.80    5.00
  -9  14   1   28.30    6.10
  -9  14   1   29.00    4.10
   8 -14  -1    6.70    2.00
   8 -14  -1    7.30    2.60
   8 -14  -1    8.50    3.40
  -8  14   1    2.90    2.00
  -8  14   1    5.50    3.20
  -8  14   1    6.90    3.60
  -8  14   1    5.00    1.70
   7 -14  -1    9.50    3.70
   7 -14  -1    7.20    2.00
   7 -14  -1    6.70    2.60
  -7  14   1    1.90    1.70
  -7  14   1    8.30    3.20
  -7  14   1    9.70    3.80
  -7  14   1    4.70    1.70
   6 -14  -1   27.00    4.50
   6 -14  -1   33.30    5.20
  -6  14   1   31.90    5.70
  -6  14   1   25.20    3.20
  -6  14   1   29.30    3.90
  -6  14   1   42.90   10.40
   5 -14  -1    2.70    2.40
   5 -14  -1    1.50    1.90
  -5  14   1    2.10    1.60
  -5  14   1    5.70    2.30
  -5  14   1   -1.80    1.90
  -5  14   1    2.30    2.10
   4 -14  -1   36.70    5.50
   4 -14  -1   28.20    4.70
  -4  14   1   33.60    5.60
  -4  14   1   27.80    2.90
  -4  14   1   33.40    3.60
  -4  14   1   34.50    5.90
   3 -14  -1    0.30    1.30
   3 -14  -1   -1.80    1.70
   3 -14  -1    0.50    1.90
  -3  14   1    1.40    2.00
  -3  14   1    0.50    1.20
  -3  14   1    3.10    3.00
   2 -14  -1   -1.40    1.70
   2 -14  -1    2.30    2.10
   2 -14  -1    0.80    1.30
  -2  14   1    1.40    1.60
  -2  14   1    1.60    1.90
  -2  14   1   -1.30    2.40
  -2  14   1   -2.10    0.90
   1 -14  -1    0.40    1.90
   1 -14  -1    2.60    2.20
  -1  14   1    1.90    2.70
  -1  14   1    0.90    1.80
  -1  14   1    0.40    1.50
  -1  14   1    2.30    1.70
   0 -14  -1   43.20    6.10
   0 -14  -1   45.10    5.10
   0  14   1   33.80    6.30
   0  14   1   43.80    3.90
   0  14   1   44.40    4.20
  -1 -14  -1  107.49    8.30
  -1 -14  -1  113.49    5.00
   1  14   1  109.29    6.50
   1  14   1  104.99    7.20
   1  14   1  120.79    8.50
   1  14   1  117.39   10.20
  -2 -14  -1   12.50    3.20
  -2 -14  -1   10.60    3.50
  -2 -14  -1    9.20    2.00
   2  14   1    9.00    4.40
   2  14   1   16.10    4.00
   2  14   1   17.30    3.20
   2  14   1   11.20    3.40
  -3 -14  -1   -1.00    1.20
  -3 -14  -1    0.00    1.80
  -3 -14  -1   -0.10    2.30
   3  14   1   -0.90    3.50
   3  14   1   -0.60    2.20
   3  14   1    1.60    2.40
   3  14   1   -0.70    1.60
  -4 -14  -1   -0.70    2.40
  -4 -14  -1   -0.50    1.20
  -4 -14  -1   -3.30    1.70
  -4 -14  -1    0.50    1.50
   4  14   1    0.90    2.10
   4  14   1    2.90    4.50
   4  14   1    1.70    2.40
   4  14   1   -0.60    1.60
  -5 -14  -1    6.70    2.30
  -5 -14  -1    4.00    2.60
  -5 -14  -1   13.60    2.40
   5  14   1   10.30    3.80
   5  14   1   10.80    3.40
   5  14   1   13.80    5.90
  -6 -14  -1    6.20    4.60
  -6 -14  -1    6.30    2.60
  -6 -14  -1    8.40    3.80
   6  14   1    8.60    3.30
   6  14   1    8.20    3.30
  11 -15  -1   -3.80    3.90
  11 -15  -1    2.20    3.30
  11 -15  -1   -0.70    1.90
 -11  15   1    2.00    1.80
 -11  15   1    2.40    3.60
  10 -15  -1   16.40    4.90
  10 -15  -1   11.50    3.70
  10 -15  -1   15.10    3.60
 -10  15   1   12.00    4.80
 -10  15   1    5.00    4.00
 -10  15   1    9.00    2.70
   9 -15  -1   -0.90    1.50
   9 -15  -1    0.20    2.20
   9 -15  -1    0.10    2.00
  -9  15   1    0.20    1.70
  -9  15   1    4.60    3.30
  -9  15   1   -2.90    2.60
  -9  15   1   -2.20    1.20
   8 -15  -1   -0.20    1.40
   8 -15  -1   -1.10    2.40
   8 -15  -1   -1.00    1.90
  -8  15   1    1.40    2.10
  -8  15   1    0.90    2.50
  -8  15   1    2.20    1.30
  -8  15   1    1.20    1.40
  -8  15   1   -3.50    3.10
   7 -15  -1    1.40    2.10
   7 -15  -1    1.70    1.40
   7 -15  -1    2.40    2.60
  -7  15   1    1.40    2.60
  -7  15   1    3.40    1.50
  -7  15   1    1.80    2.20
   6 -15  -1    2.50    2.50
   6 -15  -1    2.80    2.20
  -6  15   1    1.20    3.00
  -6  15   1    1.30    2.00
  -6  15   1    2.90    1.70
  -6  15   1   -0.10    2.20
   5 -15  -1   51.39    5.60
   5 -15  -1   53.09    7.40
  -5  15   1   42.50    6.70
  -5  15   1   41.20    4.50
  -5  15   1   41.50    4.00
  -5  15   1   43.90    6.40
   4 -15  -1    5.40    2.80
  -4  15   1    3.10    1.70
  -4  15   1    3.10    2.50
  -4  15   1    7.80    2.00
  -4  15   1    5.70    3.20
   3 -15  -1   21.10    3.10
   3 -15  -1   20.20    4.20
  -3  15   1   25.10    3.10
  -3  15   1   21.50    3.60
  -3  15   1   20.40    4.80
  -3  15   1   19.60    4.20
   2 -15  -1   -1.80    1.10
   2 -15  -1   -0.10    2.10
   2 -15  -1    0.00    3.50
  -2  15   1   -1.20    2.00
  -2  15   1   -0.50    2.30
  -2  15   1   -0.10    1.80
  -2  15   1   -1.80    1.10
   1 -15  -1   47.50    5.70
   1 -15  -1   64.69    6.60
  -1  15   1   64.59    7.80
  -1  15   1   52.29    4.50
  -1  15   1   43.90    6.30
   0 -15  -1    6.90    2.70
   0 -15  -1    4.40    3.00
   0  15   1    5.00    2.60
   0  15   1    2.40    1.90
   0  15   1    1.00    3.40
   0  15   1    1.00    2.50
  -1 -15  -1   14.80    4.10
  -1 -15  -1   14.50    3.40
  -1 -15  -1   12.80    2.00
   1  15   1    7.50    3.10
   1  15   1   14.20    1.60
   1  15   1    7.70    4.30
   1  15   1   14.90    3.70
   1  15   1   19.40    3.20
  -2 -15  -1   89.89    4.80
  -2 -15  -1   89.79    8.20
  -2 -15  -1   83.89    6.70
   2  15   1   93.09   12.80
   2  15   1   91.39    6.60
   2  15   1   89.19    7.90
   2  15   1   90.19    7.40
  -3 -15  -1   60.79    5.90
  -3 -15  -1   44.20    7.10
  -3 -15  -1   55.29    4.20
   3  15   1   44.30    5.20
   3  15   1   42.70    8.80
   3  15   1   51.79    6.40
   3  15   1   53.59    9.20
  -4 -15  -1   18.90    4.80
  -4 -15  -1   25.10    3.50
  -4 -15  -1   28.00    4.60
   4  15   1   21.10    4.20
   4  15   1   23.90    9.10
   4  15   1   22.00    4.90
  -5 -15  -1   48.70    6.00
  -5 -15  -1   28.10    5.60
  -5 -15  -1   30.50    3.90
   5  15   1   24.70    5.30
   5  15   1   35.00    5.20
  10 -16  -1   -0.20    1.90
  10 -16  -1    6.20    4.80
  10 -16  -1    1.30    1.90
 -10  16   1   -0.90    3.00
 -10  16   1    1.20    1.50
 -10  16   1    3.60    2.00
   9 -16  -1   -2.20    2.70
   9 -16  -1    6.40    2.40
   9 -16  -1   -0.40    1.70
  -9  16   1    2.50    2.90
  -9  16   1    0.50    1.80
   8 -16  -1    3.80    3.70
   8 -16  -1   10.10    3.80
  -8  16   1   12.90    4.80
  -8  16   1    9.50    2.70
  -8  16   1    3.10    3.90
  -8  16   1    4.80    1.90
   7 -16  -1    6.00    3.30
   7 -16  -1    6.80    3.00
  -7  16   1    7.90    3.90
  -7  16   1   12.50    3.30
  -7  16   1    3.30    1.60
  -7  16   1   13.40    4.00
   6 -16  -1   -0.20    2.20
   6 -16  -1    4.20    3.00
  -6  16   1    2.50    1.60
  -6  16   1    1.60    2.00
  -6  16   1   -2.20    2.80
  -6  16   1   -5.50    1.90
   5 -16  -1    1.30    2.60
   5 -16  -1   -2.20    1.90
  -5  16   1   -4.20    1.70
  -5  16   1   -1.90    1.30
  -5  16   1   -2.30    1.50
   4 -16  -1    0.50    2.40
   4 -16  -1    1.20    2.40
  -4  16   1   -0.60    2.00
  -4  16   1    1.70    3.80
  -4  16   1    1.00    1.30
  -4  16   1   -0.20    1.60
   3 -16  -1   -1.10    1.50
   3 -16  -1    1.60    2.50
   3 -16  -1    2.20    2.50
  -3  16   1    0.90    1.40
  -3  16   1    0.10    2.10
  -3  16   1    0.40    1.50
   2 -16  -1    4.20    2.00
   2 -16  -1    6.10    3.20
   2 -16  -1    6.60    3.20
  -2  16   1    0.80    1.80
  -2  16   1    0.90    2.90
  -2  16   1    4.80    2.30
   1 -16  -1   12.80    3.90
   1 -16  -1    5.40    2.80
  -1  16   1   10.80    2.70
  -1  16   1    7.60    3.60
  -1  16   1    6.60    4.20
  -1  16   1   15.20    3.50
   0 -16  -1   -1.10    2.30
   0  16   1    1.20    1.80
   0  16   1    1.80    4.00
   0  16   1    3.30    2.50
   0  16   1   -2.20    2.30
  -1 -16  -1   30.10    4.90
   1  16   1   26.30    4.60
   1  16   1   23.40    4.90
   1  16   1   29.50    7.20
   1  16   1   23.30    3.90
  -2 -16  -1   -2.40    2.30
  -2 -16  -1    1.20    1.30
   2  16   1    0.40    2.70
   2  16   1    9.30    5.20
   2  16   1   -3.10    1.60
  -3 -16  -1   -2.90    2.20
  -3 -16  -1   -0.50    1.40
  -3 -16  -1    2.50    2.80
   3  16   1    2.00    2.90
   3  16   1    4.60    2.30
   8 -17  -1    8.50    4.20
   8 -17  -1   -1.40    2.40
  -8  17   1    9.40    2.90
  -8  17   1    4.80    2.00
  -8  17   1    4.30    3.60
   7 -17  -1   16.00    4.70
   7 -17  -1    5.10    2.70
  -7  17   1    2.70    3.10
  -7  17   1    5.00    2.50
  -7  17   1    8.00    2.30
   6 -17  -1   14.00    3.60
   6 -17  -1   18.90    4.60
  -6  17   1   20.80    5.00
  -6  17   1   11.60    3.10
  -6  17   1   27.10    9.50
  -6  17   1   12.10    3.00
   5 -17  -1    0.60    2.30
   5 -17  -1    2.10    2.50
  -5  17   1   -1.10    1.80
  -5  17   1   -0.50    2.30
  -5  17   1   -3.10    2.70
  -5  17   1   -3.40    1.60
   4 -17  -1   25.60    5.10
   4 -17  -1   26.60    4.90
  -4  17   1   18.20    3.40
  -4  17   1   23.60    3.80
  -4  17   1   35.10    3.40
  -4  17   1   22.90    5.80
  -4  17   1   29.70    5.60
   3 -17  -1    0.00    1.60
   3 -17  -1    3.20    2.80
   3 -17  -1    5.80    2.70
  -3  17   1    2.20    2.00
  -3  17   1    3.00    3.50
  -3  17   1    2.70    2.40
  -3  17   1   -0.20    2.30
   2 -17  -1   23.20    3.60
   2 -17  -1   27.00    5.50
   2 -17  -1   25.50    4.90
  -2  17   1   24.50    5.00
  -2  17   1   21.80    6.20
  -2  17   1   21.50    4.90
  -2  17   1   28.30    3.90
   1 -17  -1    1.60    2.10
   1 -17  -1    0.00    1.60
   1 -17  -1   -2.30    2.30
  -1  17   1   -0.80    1.90
  -1  17   1   -1.50    2.40
  -1  17   1    2.00    2.60
   0 -17  -1    7.10    3.20
   0  17   1    1.90    3.40
   0  17   1    2.40    3.00
   0  17   1    7.80    2.80
  -1 -17  -1   14.00    4.40
  -1 -17  -1    4.90    3.70
   1  17   1   12.60    4.20
   1  17   1   19.00    6.00
  -5  18   1    4.30    2.60
  -5  18   1    3.10    3.10
  -5  18   1    5.50    2.90
  -5  18   1    5.80    2.40
   4 -18  -1   39.20    8.10
  -4  18   1    7.40    3.90
  -4  18   1    8.90    2.90
  -4  18   1   16.70    4.50
  -3  18   1   -4.60    1.90
  -3  18   1    2.10    3.10
  -3  18   1    1.90    2.40
  -3  18   1   -1.80    1.50
   1  18  -2    0.10    2.80
   1  18  -2   -0.30    2.20
   1  18  -2   -3.50    2.60
  -1 -18   2   -2.80    2.20
   0  18  -2   12.60    4.00
   0  18  -2   13.40    3.30
   0  18  -2   14.30    3.40
  -1  18  -2    1.40    2.30
  -1  18  -2   -2.10    2.20
  -1  18  -2    2.60    2.40
   1 -18   2   -0.30    2.50
  -2  18  -2   47.10    4.90
  -2  18  -2   50.89    5.20
  -2  18  -2   50.59    5.30
  -2  18  -2   48.70    7.10
  -3  18  -2   10.20    2.90
  -3  18  -2    6.60    2.60
  -3  18  -2    5.50    3.00
  -3  18  -2    1.90    2.70
  -4  18  -2    2.70    1.60
  -4  18  -2   -3.00    2.00
  -4  18  -2    8.60    2.80
  -4  18  -2   -3.70    2.00
  -5  18  -2    0.30    1.70
  -5  18  -2    0.50    2.70
  -5  18  -2    1.10    1.70
  -5  18  -2    3.60    1.60
   5 -18   2    2.90    2.80
  -6  18  -2   10.90    3.30
  -6  18  -2    0.90    1.50
  -6  18  -2    3.10    3.30
  -6  18  -2    6.70    2.20
   6 -18   2   11.20    3.80
  -7  18  -2   17.30    5.10
  -7  18  -2   24.60    3.80
   7 -18   2   29.40    4.60
   7 -18   2   19.00    4.90
   3  17  -2   51.69    5.70
   3  17  -2   53.19    6.50
   3  17  -2   55.89    6.00
   3  17  -2   51.99    7.40
  -3 -17   2   57.79    6.10
   2  17  -2   11.30    3.20
   2  17  -2    4.50    2.60
   2  17  -2    5.20    2.70
   2  17  -2    8.90    3.30
  -2 -17   2    9.80    4.10
   1  17  -2    0.70    2.40
   1  17  -2    3.00    2.40
   1  17  -2   -2.00    1.70
  -1 -17   2    5.40    2.50
  -1 -17   2   -3.30    2.30
   0  17  -2    9.80    3.90
   0  17  -2   11.70    2.90
   0  17  -2   14.00    3.10
   0 -17   2    3.70    3.00
   0 -17   2   13.10    3.50
  -1  17  -2    5.80    2.50
  -1  17  -2    4.70    2.50
  -1  17  -2    8.20    3.30
  -1  17  -2    6.60    2.50
   1 -17   2    4.50    2.80
   1 -17   2    6.70    2.80
  -2  17  -2   13.70    5.00
  -2  17  -2   13.90    3.90
  -2  17  -2    2.40    3.60
  -2  17  -2   16.20    4.20
  -2  17  -2   16.10    3.10
   2 -17   2   12.20    4.90
   2 -17   2   18.20    4.30
  -3  17  -2   22.80    3.30
  -3  17  -2   26.00    3.90
  -3  17  -2   31.20    3.80
  -3  17  -2   16.50    4.00
  -3  17  -2   20.90    5.80
   3 -17   2   30.80    7.90
   3 -17   2   23.20    4.40
  -4  17  -2   -2.00    1.40
  -4  17  -2   -0.60    3.30
  -4  17  -2   -0.60    1.60
  -4  17  -2    3.40    2.30
  -4  17  -2   -1.60    1.40
   4 -17   2    3.70    2.90
   4 -17   2    2.20    2.10
  -5  17  -2    4.60    1.90
  -5  17  -2    4.50    1.80
  -5  17  -2    2.80    1.90
  -5  17  -2    3.80    3.20
   5 -17   2    0.70    2.60
   5 -17   2    5.00    2.90
  -6  17  -2   43.30    3.70
  -6  17  -2   48.40    4.80
  -6  17  -2   41.00   10.50
   6 -17   2   32.20    7.40
   6 -17   2   30.10    5.10
   6 -17   2   39.50    6.60
  -7  17  -2   10.90    2.90
  -7  17  -2   10.50    3.70
  -7  17  -2   17.20    2.50
   7 -17   2   26.30    7.10
   7 -17   2   20.20    3.70
   7 -17   2   15.30    3.80
  -8  17  -2    5.30    2.10
  -8  17  -2    5.10    3.60
   8 -17   2   -1.50    3.10
   8 -17   2    1.90    2.70
  -9  17  -2   17.60    5.10
   9 -17   2   19.70    5.30
   5  16  -2    8.90    5.40
   5  16  -2   13.00    3.80
  -5 -16   2   12.60    2.20
  -5 -16   2   15.00    3.60
   4  16  -2    2.20    2.80
   4  16  -2    3.90    2.70
   4  16  -2    0.90    2.20
   4  16  -2    6.40    3.20
  -4 -16   2    3.10    1.50
  -4 -16   2    4.30    2.50
  -4 -16   2    5.20    3.30
   3  16  -2    5.00    3.10
   3  16  -2    6.10    2.80
   3  16  -2   11.90    3.40
  -3 -16   2    9.60    3.50
  -3 -16   2    9.50    3.00
   2  16  -2   24.50    4.90
   2  16  -2   21.20    3.80
   2  16  -2   18.10    3.80
   2  16  -2   25.00    4.40
   2  16  -2   21.90    5.90
  -2 -16   2   22.00    4.10
  -2 -16   2   21.00    4.70
   1  16  -2    1.70    3.20
   1  16  -2    3.10    2.40
   1  16  -2    0.70    1.90
  -1 -16   2   -0.10    3.20
   0  16  -2   26.00    4.10
   0  16  -2   27.40    5.90
   0  16  -2   29.00    5.10
   0  16  -2   30.20    4.40
   0 -16   2   30.60    5.00
   0 -16   2   28.40    4.90
  -1  16  -2   61.29    7.30
  -1  16  -2   50.39    4.80
  -1  16  -2   49.20    4.80
  -1  16  -2   47.10    5.50
  -1  16  -2   51.99    5.60
   1 -16   2   50.09    5.70
   1 -16   2   50.69    5.80
  -2  16  -2    2.10    1.70
  -2  16  -2    2.20    3.20
  -2  16  -2    0.90    1.70
  -2  16  -2    1.20    1.60
  -2  16  -2    4.80    2.30
   2 -16   2    0.80    2.00
   2 -16   2    1.40    2.10
  -3  16  -2   55.69    5.00
  -3  16  -2   49.50    4.20
  -3  16  -2   53.99    7.70
  -3  16  -2   54.69    6.00
   3 -16   2   49.70    5.80
   3 -16   2   42.50    5.20
  -4  16  -2    8.30    2.80
  -4  16  -2    1.80    1.60
  -4  16  -2    1.10    1.50
  -4  16  -2    3.70    1.80
  -4  16  -2    1.50    2.70
   4 -16   2    2.80    2.60
   4 -16   2    1.00    1.90
  -5  16  -2   14.10    2.80
  -5  16  -2    8.90    3.40
  -5  16  -2   16.90    2.70
  -5  16  -2   13.40    2.50
  -5  16  -2   16.70    4.50
   5 -16   2   14.50    3.10
   5 -16   2   16.60    3.80
   5 -16   2   10.40    3.70
  -6  16  -2  185.28    6.90
  -6  16  -2  188.78   11.50
  -6  16  -2  183.48    8.40
  -6  16  -2  183.88    7.20
  -6  16  -2  199.88   12.40
   6 -16   2  175.48   10.90
   6 -16   2  187.48   13.30
   6 -16   2  183.08    8.90
  -7  16  -2   91.69    8.50
  -7  16  -2   90.49    5.70
  -7  16  -2   87.69    8.50
  -7  16  -2   86.29    4.50
   7 -16   2   92.39    8.70
   7 -16   2   84.89    6.90
  -8  16  -2   92.89    5.60
   8 -16   2   95.39    6.90
   8 -16   2   99.49    7.30
   8 -16   2   80.19    8.20
  -9  16  -2    7.30    3.70
   9 -16   2    7.90    3.70
   9 -16   2    6.00    2.60
 -10  16  -2   15.50    5.50
  10 -16   2   28.30    5.10
  10 -16   2   16.80    4.40
   6  15  -2   -0.20    2.80
   6  15  -2    4.10    2.60
  -6 -15   2    4.70    2.50
   5  15  -2   -4.90    1.80
   5  15  -2    3.80    2.70
   5  15  -2   -3.50    1.80
  -5 -15   2   -1.90    2.20
  -5 -15   2   -4.50    2.10
   4  15  -2   28.40    6.90
   4  15  -2   18.40    4.60
   4  15  -2   15.80    4.10
   4  15  -2   16.40    3.80
  -4 -15   2   15.40    4.60
  -4 -15   2   24.90    4.00
  -4 -15   2   20.50    2.70
   3  15  -2   54.29    5.50
   3  15  -2   44.20    5.20
   3  15  -2   38.50    5.80
   3  15  -2   42.60    7.60
   3  15  -2   46.60    5.40
  -3 -15   2   49.30    5.10
  -3 -15   2   49.60    3.30
  -3 -15   2   46.00    6.50
   2  15  -2    4.80    2.50
   2  15  -2    5.20    2.40
   2  15  -2   11.10    3.20
   2  15  -2    7.90    5.90
  -2 -15   2    8.30    2.70
  -2 -15   2    4.60    2.60
   1  15  -2    1.30    2.00
   1  15  -2   -0.70    3.40
   1  15  -2    0.10    0.70
   1  15  -2    4.60    2.40
   1  15  -2    1.10    2.00
   1  15  -2    2.20    1.90
  -1 -15   2    1.80    1.90
   0  15  -2   43.40    4.50
   0  15  -2   40.10    6.80
   0  15  -2   30.50    4.20
   0  15  -2   32.30    5.20
   0 -15   2   43.00    4.60
   0 -15   2   36.20    5.50
  -1  15  -2    6.20    3.40
  -1  15  -2   10.90    2.60
  -1  15  -2    6.40    2.90
  -1  15  -2    5.60    2.50
  -1  15  -2    7.20    2.10
   1 -15   2    5.60    2.60
   1 -15   2    6.00    2.60
  -2  15  -2    6.10    2.20
  -2  15  -2    6.10    2.70
  -2  15  -2    7.70    2.20
  -2  15  -2    3.10    2.80
  -2  15  -2    5.00    2.10
   2 -15   2    5.40    2.70
   2 -15   2    2.90    2.10
  -3  15  -2    1.60    1.90
  -3  15  -2    0.30    1.60
  -3  15  -2   -0.30    1.20
  -3  15  -2   -3.60    1.80
  -3  15  -2   -0.90    1.20
   3 -15   2   -2.60    1.80
   3 -15   2   -1.30    1.50
  -4  15  -2    5.50    2.70
  -4  15  -2    9.30    2.10
  -4  15  -2   10.10    3.60
  -4  15  -2   10.40    2.30
  -4  15  -2    9.70    2.30
   4 -15   2   13.90    2.80
   4 -15   2    9.40    2.90
   4 -15   2   14.30    3.60
  -5  15  -2  156.68   10.40
  -5  15  -2  146.99    6.00
  -5  15  -2  135.69    9.40
  -5  15  -2  159.18    7.50
  -5  15  -2  145.29    6.30
   5 -15   2  151.58    8.10
   5 -15   2  152.88    9.40
   5 -15   2  158.48    9.10
  -6  15  -2    1.10    1.40
  -6  15  -2    5.00    2.80
  -6  15  -2    0.10    1.90
  -6  15  -2    4.50    2.00
   6 -15   2    4.50    2.30
   6 -15   2    1.00    2.50
   6 -15   2    3.70    2.20
  -7  15  -2    0.40    2.10
  -7  15  -2    3.60    1.60
  -7  15  -2    3.00    2.90
  -7  15  -2    2.90    1.70
   7 -15   2    7.30    2.70
   7 -15   2    4.70    2.20
   7 -15   2    3.50    2.90
  -8  15  -2   -1.10    2.80
  -8  15  -2    1.80    1.40
  -8  15  -2    1.60    1.70
  -8  15  -2    1.90    3.00
   8 -15   2    3.10    3.10
   8 -15   2    7.80    2.70
   8 -15   2    3.90    2.50
  -9  15  -2    7.70    3.70
  -9  15  -2   -1.50    1.00
  -9  15  -2    6.70    3.30
   9 -15   2    6.20    3.10
   9 -15   2    0.20    2.80
   9 -15   2    1.50    1.80
 -10  15  -2   -1.40    1.00
 -10  15  -2   -7.60    2.90
  10 -15   2   -3.10    1.60
  10 -15   2    0.60    3.00
  10 -15   2    0.90    2.50
 -11  15  -2   -4.90    3.70
 -11  15  -2    0.10    1.30
  11 -15   2    8.60    4.10
  11 -15   2    1.00    3.50
   8  14  -2    4.00    3.00
   8  14  -2    2.70    1.90
  -8 -14   2    1.40    1.50
  -8 -14   2   -0.50    2.20
   7  14  -2    2.10    2.70
   7  14  -2   -3.40    1.80
  -7 -14   2    1.10    1.30
  -7 -14   2   -1.70    1.80
  -7 -14   2   -1.90    2.60
   6  14  -2   18.90    5.10
   6  14  -2   20.80    9.10
   6  14  -2   17.50    4.20
   6  14  -2   21.10    4.60
  -6 -14   2   15.80    4.20
  -6 -14   2   24.70    4.00
  -6 -14   2   26.10    2.60
   5  14  -2    3.30    2.50
   5  14  -2   -3.00    2.00
   5  14  -2   -1.20    1.60
   5  14  -2   -0.20    3.40
  -5 -14   2    4.90    3.90
  -5 -14   2    3.00    2.40
   4  14  -2   10.10    3.20
   4  14  -2   11.40    3.30
   4  14  -2    4.10    2.30
  -4 -14   2    7.00    2.60
  -4 -14   2    5.60    2.70
   3  14  -2    2.20    2.30
   3  14  -2   -2.10    2.40
   3  14  -2    3.20    2.30
  -3 -14   2    1.00    1.10
  -3 -14   2    2.20    2.30
  -3 -14   2    6.60    2.30
   2  14  -2   59.49    5.30
   2  14  -2   73.49    8.20
   2  14  -2   67.19    6.20
   2  14  -2   63.09    5.40
   2  14  -2   67.49    5.80
  -2 -14   2   63.69    3.10
  -2 -14   2   69.89    5.60
  -2 -14   2   62.39    6.20
   1  14  -2    2.10    1.60
   1  14  -2   -1.40    1.40
   1  14  -2   -0.80    2.10
   1  14  -2    1.80    1.60
   1  14  -2    0.10    1.30
  -1 -14   2    1.10    1.70
  -1 -14   2    0.30    1.80
   0  14  -2    2.50    2.50
   0  14  -2    2.00    1.70
   0  14  -2   -1.10    2.50
   0  14  -2    4.20    2.40
   0 -14   2    2.80    1.90
   0 -14   2    1.20    1.80
  -1  14  -2   32.60    3.60
  -1  14  -2   31.90    5.20
  -1  14  -2   24.00    3.40
  -1  14  -2   27.10    3.60
  -1  14  -2   21.70    4.90
   1 -14   2   26.70    4.40
   1 -14   2   20.80    3.80
  -2  14  -2    3.80    1.70
  -2  14  -2    5.20    2.00
  -2  14  -2    3.20    2.40
  -2  14  -2    2.40    2.70
  -2  14  -2    6.50    2.00
   2 -14   2    3.30    2.20
   2 -14   2    2.30    1.90
  -3  14  -2   27.90    3.30
  -3  14  -2   22.40    4.50
  -3  14  -2   25.20    2.90
  -3  14  -2   15.60    2.70
  -3  14  -2   13.20    3.60
   3 -14   2   21.00    4.00
   3 -14   2   21.80    3.90
  -4  14  -2   -1.40    1.10
  -4  14  -2    2.20    1.50
  -4  14  -2    1.10    2.20
  -4  14  -2    3.00    2.20
  -4  14  -2    2.10    1.30
   4 -14   2    0.20    1.70
   4 -14   2    0.20    1.60
   4 -14   2   -2.50    1.20
  -5  14  -2  149.59    6.20
  -5  14  -2  148.79    9.40
  -5  14  -2  157.28    7.30
  -5  14  -2  162.78   10.10
   5 -14   2  153.88    9.10
   5 -14   2  160.68    8.70
   5 -14   2  154.68    7.90
  -6  14  -2  138.99    5.80
  -6  14  -2  143.49    9.40
  -6  14  -2  135.99    6.70
  -6  14  -2  142.59    9.50
   6 -14   2  143.19    8.00
   6 -14   2  139.79    8.10
   6 -14   2  151.08    9.20
  -7  14  -2    5.90    1.60
  -7  14  -2    3.60    2.80
  -7  14  -2   -1.20    2.20
   7 -14   2    0.80    1.80
   7 -14   2    3.90    2.00
   7 -14   2    1.20    2.00
  -8  14  -2    1.60    1.30
  -8  14  -2    0.20    2.30
  -8  14  -2   -2.30    1.70
   8 -14   2   -0.80    2.10
   8 -14   2    3.40    2.10
  -9  14  -2    8.50    2.00
  -9  14  -2    7.60    3.60
  -9  14  -2    8.90    3.70
   9 -14   2   15.50    3.20
   9 -14   2    5.30    2.60
   9 -14   2   12.90    4.20
 -10  14  -2   27.30    5.50
 -10  14  -2   41.30    9.10
 -10  14  -2   35.90    3.20
  10 -14   2   41.60    6.80
  10 -14   2   44.00    6.60
  10 -14   2   44.30    4.90
 -11  14  -2   -5.90    3.10
 -11  14  -2    0.40    1.20
  11 -14   2    1.50    3.10
  11 -14   2   -0.90    1.80
 -12  14  -2   -1.30    3.60
 -12  14  -2    0.30    1.30
  12 -14   2    0.80    2.70
   9  13  -2   -0.10    2.60
  -9 -13   2    1.80    1.60
  -9 -13   2    3.10    2.20
   8  13  -2   -1.60    2.30
   8  13  -2    1.00    2.70
   8  13  -2   -1.60    0.80
  -8 -13   2    2.60    3.00
  -8 -13   2   -0.30    1.30
  -8 -13   2    2.30    2.40
   7  13  -2   -1.30    3.20
   7  13  -2    2.80    2.60
   7  13  -2    1.00    3.50
   7  13  -2   -6.60    4.10
  -7 -13   2    2.10    1.30
  -7 -13   2    4.20    2.20
  -7 -13   2    0.60    2.60
   6  13  -2   73.19   10.80
   6  13  -2   71.39    6.60
   6  13  -2   71.09    6.50
   6  13  -2   65.49    6.60
  -6 -13   2   80.59    7.90
  -6 -13   2   74.09    4.10
  -6 -13   2   63.49    6.80
   5  13  -2    7.40    4.80
   5  13  -2    9.40    2.90
   5  13  -2    7.80    2.90
   5  13  -2    8.90    3.00
  -5 -13   2    5.60    2.90
  -5 -13   2   10.40    2.60
   4  13  -2   10.20    2.90
   4  13  -2   12.70    3.40
   4  13  -2   17.60    5.40
  -4 -13   2   14.30    3.60
  -4 -13   2   14.10    3.00
   3  13  -2   14.40    3.40
   3  13  -2   20.00    3.90
   3  13  -2   11.60    2.90
   3  13  -2   11.50    4.40
  -3 -13   2   15.00    3.50
  -3 -13   2   13.30    2.80
   2  13  -2   29.20    4.20
   2  13  -2   33.80    6.00
   2  13  -2   21.70    4.00
   2  13  -2   20.30    3.70
  -2 -13   2   26.40    2.20
  -2 -13   2   16.90    3.80
  -2 -13   2   26.90    3.80
   1  13  -2   12.50    2.80
   1  13  -2   10.10    3.10
   1  13  -2   11.30    2.60
   1  13  -2   10.70    3.70
  -1 -13   2    7.20    2.60
  -1 -13   2   10.30    2.70
   0  13  -2    1.30    2.10
   0  13  -2    3.20    1.80
   0  13  -2    2.80    1.70
   0  13  -2    4.20    2.90
   0  13  -2    2.70    1.80
   0 -13   2    3.50    2.00
   0 -13   2    3.80    2.10
  -1  13  -2   10.60    2.30
  -1  13  -2   13.00    2.50
  -1  13  -2    8.90    3.20
  -1  13  -2    7.60    2.80
   1 -13   2   10.80    2.90
   1 -13   2    6.40    2.30
  -2  13  -2   40.60    3.40
  -2  13  -2   39.20    3.80
  -2  13  -2   38.60    3.70
  -2  13  -2   47.10    5.20
  -2  13  -2   33.00    5.10
   2 -13   2   49.10    4.90
   2 -13   2   39.20    4.60
  -3  13  -2   24.20    3.20
  -3  13  -2   18.00    3.80
  -3  13  -2   25.10    2.70
  -3  13  -2   18.50    4.00
  -3  13  -2   26.20    5.10
   3 -13   2   26.40    4.10
   3 -13   2   24.10    3.60
   3 -13   2   21.70    3.90
  -4  13  -2   29.10    3.30
  -4  13  -2   29.30    3.00
  -4  13  -2   23.60    4.20
  -4  13  -2   29.10    4.80
   4 -13   2   29.90    4.00
   4 -13   2   23.60    4.00
   4 -13   2   26.60    4.10
  -5  13  -2   48.70    3.90
  -5  13  -2   43.40    3.40
  -5  13  -2   41.50    5.70
  -5  13  -2   44.90    5.40
   5 -13   2   42.10    4.40
   5 -13   2   47.10    5.20
   5 -13   2   44.40    4.40
  -6  13  -2   17.10    4.10
  -6  13  -2   22.60    2.50
  -6  13  -2   19.90    2.90
  -6  13  -2   24.60    4.60
   6 -13   2   23.50    4.20
   6 -13   2   21.00    3.60
   6 -13   2   27.90    4.10
  -7  13  -2   12.60    2.10
  -7  13  -2    9.20    3.30
  -7  13  -2    3.30    2.60
  -7  13  -2   11.60    2.30
   7 -13   2    9.80    2.70
   7 -13   2    6.50    2.80
   7 -13   2   14.50    3.70
  -8  13  -2   11.80    3.80
  -8  13  -2    9.50    3.30
  -8  13  -2   13.00    2.30
   8 -13   2   11.10    3.00
   8 -13   2   12.90    2.80
   8 -13   2    7.80    3.00
  -9  13  -2   -1.50    2.00
  -9  13  -2    3.30    2.70
  -9  13  -2   -0.10    1.20
   9 -13   2    1.10    1.60
   9 -13   2   -0.10    2.20
   9 -13   2   -3.20    1.50
 -10  13  -2   22.30    5.00
 -10  13  -2   18.70    2.70
 -10  13  -2   29.90    6.40
  10 -13   2   20.30    2.70
  10 -13   2   19.00    3.50
 -11  13  -2   -3.70    3.20
 -11  13  -2   -0.40    1.30
 -11  13  -2   -1.60    2.50
  11 -13   2    1.90    2.00
  11 -13   2    2.50    1.60
  11 -13   2    3.50    2.90
 -12  13  -2   -4.60    3.70
  12 -13   2    1.00    2.80
  12 -13   2   -3.20    1.20
  12 -13   2   -0.90    1.50
 -13  13  -2    1.40    1.80
  13 -13   2    0.30    2.20
  10  12  -2    7.60    3.60
 -10 -12   2   10.40    2.50
 -10 -12   2   13.60    3.30
   9  12  -2   27.50    5.20
   9  12  -2   23.90    5.00
  -9 -12   2   29.80    5.90
  -9 -12   2   21.50    3.10
  -9 -12   2   26.90    4.20
   8  12  -2    6.70    1.40
   8  12  -2   -0.90    5.10
   8  12  -2    9.30    3.10
  -8 -12   2    4.40    1.70
  -8 -12   2    9.70    5.70
  -8 -12   2   11.10    3.00
   7  12  -2   37.50    8.50
   7  12  -2   49.50    6.80
   7  12  -2   40.20    5.70
   7  12  -2   45.60    6.50
  -7 -12   2   45.50    6.30
  -7 -12   2   47.30    3.50
  -7 -12   2   37.70    6.10
   6  12  -2    2.70    2.20
   6  12  -2    4.30    4.20
   6  12  -2    0.40    1.90
   6  12  -2    3.20    2.40
  -6 -12   2    4.50    2.70
  -6 -12   2    2.70    1.90
  -6 -12   2    2.40    1.20
   5  12  -2    2.40    2.30
   5  12  -2    5.20    2.70
   5  12  -2    7.10    4.40
  -5 -12   2    8.50    2.50
  -5 -12   2    8.30    1.50
  -5 -12   2   10.90    3.50
   4  12  -2    2.80    2.90
   4  12  -2    1.40    1.60
   4  12  -2   -0.30    1.50
   4  12  -2    0.90    1.70
  -4 -12   2    0.10    1.60
  -4 -12   2   -2.00    1.20
   3  12  -2    2.90    2.00
   3  12  -2   -1.00    2.10
   3  12  -2    1.10    1.80
   3  12  -2    2.90    2.20
  -3 -12   2    2.20    1.80
  -3 -12   2    3.50    1.90
   2  12  -2    3.40    2.30
   2  12  -2    0.60    1.60
   2  12  -2   -1.60    1.40
  -2 -12   2   -1.60    1.30
   1  12  -2   21.90    3.40
   1  12  -2   19.60    3.70
   1  12  -2   25.00    6.50
   1  12  -2   22.70    3.50
   1  12  -2   20.10    3.10
  -1 -12   2   20.10    3.30
  -1 -12   2   15.20    3.40
   0  12  -2  204.28    9.70
   0  12  -2  206.18    8.10
   0  12  -2  203.08   10.80
   0  12  -2  219.38    8.70
   0  12  -2  201.18    8.80
   0 -12   2  214.68    9.20
   0 -12   2  207.58   13.90
  -1  12  -2    0.50    1.30
  -1  12  -2    0.30    1.10
  -1  12  -2   -0.80    1.60
  -1  12  -2    2.70    2.00
   1 -12   2    0.00    1.80
   1 -12   2    0.40    1.40
  -2  12  -2   84.79    6.20
  -2  12  -2   81.49    5.00
  -2  12  -2   83.09    4.40
  -2  12  -2   77.79    4.90
  -2  12  -2   78.89    6.30
   2 -12   2   82.79    5.20
   2 -12   2   80.29    6.50
   2 -12   2   80.09    5.70
  -3  12  -2  162.88    6.90
  -3  12  -2  167.28    8.70
  -3  12  -2  156.08    8.80
  -3  12  -2  161.18    5.90
  -3  12  -2  159.48    6.90
   3 -12   2  159.68    8.30
   3 -12   2  161.28    7.40
  -4  12  -2  153.18    8.50
  -4  12  -2  152.98    6.60
  -4  12  -2  148.49    8.70
  -4  12  -2  138.79    5.70
   4 -12   2  150.78    8.20
   4 -12   2  140.99    7.00
   4 -12   2  136.19    7.70
  -5  12  -2  271.77   15.50
  -5  12  -2  284.77    8.50
  -5  12  -2  298.97    9.60
  -5  12  -2  282.07   12.30
   5 -12   2  279.77   10.60
   5 -12   2  293.47   12.00
   5 -12   2  274.77   10.90
  -6  12  -2   32.30    3.20
  -6  12  -2   27.30    4.60
  -6  12  -2   29.00    4.90
  -6  12  -2   32.20    2.80
   6 -12   2   31.10    3.80
   6 -12   2   31.50    3.80
   6 -12   2   29.90    4.70
  -7  12  -2   -1.40    1.80
  -7  12  -2    1.40    1.20
  -7  12  -2    0.80    1.10
  -7  12  -2   -2.80    1.50
   7 -12   2    1.90    2.00
   7 -12   2    0.80    1.80
   7 -12   2   -1.90    1.10
  -8  12  -2   34.90    6.10
  -8  12  -2   44.30    5.50
  -8  12  -2   38.20    3.10
   8 -12   2   35.60    4.10
   8 -12   2   38.60    5.50
   8 -12   2   38.40    3.20
  -9  12  -2   23.60    3.00
  -9  12  -2   24.90    4.90
  -9  12  -2   22.90    5.50
   9 -12   2   23.70    3.90
   9 -12   2   22.50    2.60
   9 -12   2   29.70    5.20
 -10  12  -2   -3.40    2.10
 -10  12  -2    1.40    1.50
 -10  12  -2    8.50    4.20
  10 -12   2    0.10    1.20
  10 -12   2   -2.10    2.00
  10 -12   2    1.10    1.60
 -11  12  -2   29.20    5.30
 -11  12  -2   15.50    5.30
 -11  12  -2   29.20    3.20
  11 -12   2   32.50    3.30
  11 -12   2   23.40    4.90
  11 -12   2   18.80    3.50
 -12  12  -2    8.00    4.90
 -12  12  -2    3.30    1.80
  12 -12   2    7.70    3.90
  12 -12   2   -2.30    1.70
 -13  12  -2   -2.40    4.80
 -13  12  -2   -1.80    1.60
 -13  12  -2   -0.50    1.30
  13 -12   2    3.90    3.70
  13 -12   2    3.30    2.10
  10  11  -2   -0.20    2.30
 -10 -11   2    0.80    2.30
 -10 -11   2   -5.00    2.40
 -10 -11   2    0.00    1.20
   9  11  -2    5.00    3.20
   9  11  -2    0.40    4.70
   9  11  -2    0.60    2.10
  -9 -11   2    4.20    1.70
  -9 -11   2    1.00    3.00
   8  11  -2   12.40    1.60
   8  11  -2   10.90    3.20
   8  11  -2   10.70    3.70
   8  11  -2    8.80    3.30
  -8 -11   2   10.70    3.50
  -8 -11   2    7.40    1.70
  -8 -11   2    6.70    4.10
   7  11  -2    3.30    2.00
   7  11  -2   10.20    5.50
   7  11  -2    2.20    2.10
   7  11  -2    6.10    3.10
  -7 -11   2    4.90    2.10
  -7 -11   2    2.90    2.50
  -7 -11   2    3.00    1.30
   6  11  -2   31.80    7.20
   6  11  -2   24.80    3.90
   6  11  -2   28.90    4.60
   6  11  -2   26.80    4.40
  -6 -11   2   31.00    5.20
  -6 -11   2   30.70    3.50
  -6 -11   2   29.80    2.70
   5  11  -2   -0.60    2.70
   5  11  -2    3.60    1.90
   5  11  -2   -0.60    1.80
   5  11  -2    3.50    2.10
  -5 -11   2    1.70    1.10
  -5 -11   2   -0.30    1.60
  -5 -11   2    6.20    2.00
   4  11  -2    6.10    3.00
   4  11  -2    1.60    1.80
   4  11  -2   -1.00    1.60
   4  11  -2    4.80    2.60
  -4 -11   2    4.30    1.90
  -4 -11   2    3.70    2.40
  -4 -11   2    3.10    1.10
   3  11  -2   52.89    6.20
   3  11  -2   52.79    4.90
   3  11  -2   54.19    5.60
  -3 -11   2   51.39    5.60
  -3 -11   2   53.39    4.30
   2  11  -2   10.60    2.50
   2  11  -2    8.70    2.40
   2  11  -2    7.60    3.00
   2  11  -2   10.80    2.80
   2  11  -2    9.40    1.00
  -2 -11   2    8.80    2.60
   1  11  -2    0.40    1.20
   1  11  -2   -0.40    1.20
   1  11  -2    0.70    1.70
   1  11  -2    1.00    1.40
   1  11  -2   -0.30    1.60
  -1 -11   2    0.10    1.40
  -1 -11   2    1.70    1.50
   0  11  -2    9.40    2.10
   0  11  -2    5.20    1.90
   0  11  -2    6.60    2.00
   0  11  -2    4.70    2.10
   0  11  -2    5.40    2.80
   0 -11   2    6.00    2.30
   0 -11   2    4.80    2.00
  -1  11  -2   53.79    3.50
  -1  11  -2   55.59    5.20
  -1  11  -2   53.59    4.00
  -1  11  -2   50.19    4.60
   1 -11   2   62.09    4.70
   1 -11   2   52.29    4.70
  -2  11  -2    1.60    1.70
  -2  11  -2    2.20    1.20
  -2  11  -2    2.00    1.30
  -2  11  -2    3.50    1.60
  -2  11  -2   -0.30    1.50
   2 -11   2    2.00    1.50
   2 -11   2    2.90    1.80
   2 -11   2    4.00    2.00
  -3  11  -2    5.90    2.20
  -3  11  -2    6.90    1.90
  -3  11  -2    5.70    2.50
  -3  11  -2    6.50    1.80
   3 -11   2    4.70    2.10
   3 -11   2    7.10    2.00
   3 -11   2    4.80    2.00
  -4  11  -2   74.39    3.90
  -4  11  -2   69.89    4.30
  -4  11  -2   63.99    6.20
  -4  11  -2   67.39    5.40
   4 -11   2   71.89    5.00
   4 -11   2   63.29    5.30
   4 -11   2   61.99    4.90
  -5  11  -2   48.00    3.10
  -5  11  -2   45.10    4.80
  -5  11  -2   48.50    3.60
  -5  11  -2   45.30    5.00
   5 -11   2   47.80    4.30
   5 -11   2   50.89    4.40
   5 -11   2   52.89    5.00
  -6  11  -2   41.20    2.90
  -6  11  -2   39.10    5.50
  -6  11  -2   44.20    4.90
  -6  11  -2   36.30    3.20
   6 -11   2   43.10    4.30
   6 -11   2   33.70    5.40
   6 -11   2   46.10    4.70
  -7  11  -2   -1.20    1.90
  -7  11  -2   -0.30    1.10
  -7  11  -2    1.90    1.80
   7 -11   2    2.50    2.00
   7 -11   2    0.50    1.10
   7 -11   2    0.10    1.30
  -8  11  -2   45.00    5.20
  -8  11  -2   40.40    3.30
  -8  11  -2   36.40    6.00
   8 -11   2   43.20    5.10
   8 -11   2   41.40    4.00
   8 -11   2   41.10    3.30
  -9  11  -2    5.00    3.10
  -9  11  -2    5.80    2.60
  -9  11  -2    3.50    1.40
   9 -11   2    1.70    1.60
   9 -11   2   -0.30    1.20
   9 -11   2    3.40    2.40
 -10  11  -2    5.70    1.90
 -10  11  -2    2.40    2.40
 -10  11  -2    7.80    4.00
  10 -11   2   -0.30    2.30
  10 -11   2    1.80    1.40
  10 -11   2    4.70    1.60
 -11  11  -2   -1.10    2.80
 -11  11  -2    0.20    1.40
 -11  11  -2   -0.30    2.70
  11 -11   2   -0.40    1.20
  11 -11   2   -1.50    4.20
  11 -11   2    0.70    1.50
 -12  11  -2    5.00    3.10
 -12  11  -2    6.00    4.40
 -12  11  -2    3.80    2.10
  12 -11   2    8.10    3.90
  12 -11   2    3.60    1.80
 -13  11  -2   26.80    3.10
 -13  11  -2   24.70    3.90
 -13  11  -2   14.50    6.70
  13 -11   2   24.80    3.90
  13 -11   2   29.50    4.30
  13 -11   2   20.70    5.10
  11  10  -2   -2.90    2.20
 -11 -10   2    1.50    2.40
 -11 -10   2   -3.00    3.60
 -11 -10   2    1.20    2.10
  10  10  -2    8.40    3.20
  10  10  -2    4.70    5.00
 -10 -10   2   10.60    2.80
 -10 -10   2    2.20    3.00
 -10 -10   2    5.30    1.80
   9  10  -2   13.90    9.60
   9  10  -2   -1.20    2.10
   9  10  -2    2.60    2.00
  -9 -10   2    4.20    2.20
  -9 -10   2    5.70    3.20
   8  10  -2    1.70    0.80
   8  10  -2    0.60    4.00
   8  10  -2    2.00    3.50
   8  10  -2    2.20    2.10
  -8 -10   2    3.50    1.90
  -8 -10   2   10.00    3.20
   7  10  -2   84.79    6.50
   7  10  -2   87.49    7.00
   7  10  -2   87.79   10.30
   7  10  -2   82.39    6.50
  -7 -10   2   90.29    5.50
  -7 -10   2   85.99    7.50
  -7 -10   2   76.39    4.30
   6  10  -2  210.78    9.90
   6  10  -2  231.48   15.00
   6  10  -2  200.08   10.10
  -6 -10   2  192.38   10.70
  -6 -10   2  206.98    6.90
  -6 -10   2  200.78    8.30
   5  10  -2  147.89    9.00
   5  10  -2  170.08    8.60
  -5 -10   2  160.18    7.10
  -5 -10   2  160.68    9.30
  -5 -10   2  155.98    5.50
   4  10  -2   67.79    5.50
   4  10  -2   68.99    7.10
   4  10  -2   58.69    5.00
   4  10  -2   62.89    5.20
  -4 -10   2   73.29    4.70
  -4 -10   2   63.69    3.00
  -4 -10   2   58.29    5.50
   3  10  -2   26.30    3.70
   3  10  -2   19.20    3.40
   3  10  -2   22.00    3.30
  -3 -10   2   24.70    1.70
  -3 -10   2   21.90    3.00
  -3 -10   2   22.90    4.00
   2  10  -2    0.10    1.30
   2  10  -2    3.60    1.80
   2  10  -2    1.30    1.40
   2  10  -2    0.70    1.80
  -2 -10   2    2.40    1.70
   1  10  -2    7.40    2.10
   1  10  -2    9.90    2.10
   1  10  -2    9.70    2.30
   1  10  -2   10.00    2.80
  -1 -10   2    7.20    2.30
  -1 -10   2    8.20    2.10
   0  10  -2   25.80    2.80
   0  10  -2   29.10    3.30
   0  10  -2   22.30    2.50
   0  10  -2   21.90    3.40
   0  10  -2   17.50    3.20
   0 -10   2   23.20    2.90
   0 -10   2   23.20    3.50
  -1  10  -2    9.80    1.70
  -1  10  -2    5.90    2.20
  -1  10  -2    7.00    1.70
  -1  10  -2    4.70    1.90
   1 -10   2    7.60    2.00
   1 -10   2    7.60    2.30
   1 -10   2    6.00    1.90
  -2  10  -2   82.69    4.40
  -2  10  -2   85.19    5.80
  -2  10  -2   90.39    3.90
  -2  10  -2   83.89    5.50
  -2  10  -2   84.79    4.60
   2 -10   2   80.59    5.30
   2 -10   2   84.89    4.90
   2 -10   2   85.39    5.40
  -3  10  -2  213.38    7.40
  -3  10  -2  214.68    9.20
  -3  10  -2  210.78    9.30
  -3  10  -2  219.68    7.50
   3 -10   2  200.68    8.70
   3 -10   2  229.58    9.00
   3 -10   2  216.68    8.30
  -4  10  -2  972.90   20.70
  -4  10  -2  999.70   21.80
  -4  10  -2 1005.60   24.90
  -4  10  -2  971.50   24.80
   4 -10   2  954.10   23.40
   4 -10   2  981.30   24.40
   4 -10   2  966.50   23.20
  -5  10  -2  309.77   12.10
  -5  10  -2  308.27    8.40
  -5  10  -2  312.87   11.70
  -5  10  -2  304.37    9.30
   5 -10   2  314.67   11.60
   5 -10   2  307.07   10.80
   5 -10   2  309.67   10.80
  -6  10  -2   15.90    3.60
  -6  10  -2   17.20    2.10
  -6  10  -2   15.10    2.30
  -6  10  -2   15.90    3.20
   6 -10   2   15.90    3.30
   6 -10   2   17.30    2.90
   6 -10   2   17.50    2.40
  -7  10  -2    0.00    1.10
  -7  10  -2   -1.90    1.30
  -7  10  -2    0.00    2.00
   7 -10   2    2.10    1.90
   7 -10   2    2.30    1.90
   7 -10   2    0.10    1.10
  -8  10  -2   -0.20    2.30
  -8  10  -2    3.90    2.20
  -8  10  -2    1.20    1.30
   8 -10   2    4.60    2.40
   8 -10   2    2.70    1.50
   8 -10   2   -0.20    1.10
  -9  10  -2    0.10    2.80
  -9  10  -2    1.10    2.10
  -9  10  -2    1.40    1.40
   9 -10   2    1.10    1.30
   9 -10   2    0.50    1.80
   9 -10   2    2.70    1.70
 -10  10  -2    1.20    1.40
 -10  10  -2    0.30    2.00
 -10  10  -2   -2.30    2.30
  10 -10   2    2.20    1.40
  10 -10   2   -0.10    1.90
  10 -10   2    1.40    1.40
 -11  10  -2   11.80    3.50
 -11  10  -2   10.00    4.60
 -11  10  -2   10.00    2.30
  11 -10   2   11.20    2.40
  11 -10   2   13.00    3.80
  11 -10   2   12.30    2.90
 -12  10  -2    3.80    2.00
 -12  10  -2   -1.30    2.10
 -12  10  -2    8.70    7.00
 -12  10  -2    2.10    1.40
  12 -10   2    0.70    1.80
  12 -10   2    3.80    3.10
  12 -10   2    3.30    1.80
 -13  10  -2   22.20    7.70
 -13  10  -2   23.50    8.50
 -13  10  -2   19.50    2.60
 -13  10  -2   24.60    4.20
  13 -10   2   22.50    3.50
  13 -10   2   13.70    3.00
  13 -10   2   15.80    4.90
 -14  10  -2    6.30    1.80
 -14  10  -2    1.50    2.30
  14 -10   2   -3.10    3.40
  12   9  -2    4.10    2.60
 -12  -9   2   -2.00    2.10
  11   9  -2    5.60    2.80
  11   9  -2    8.30    7.80
 -11  -9   2    7.10    2.70
 -11  -9   2    5.40    3.40
  10   9  -2   -6.00    4.60
 -10  -9   2    4.90    3.40
 -10  -9   2    4.60    1.90
   9   9  -2    0.80    2.00
   9   9  -2   -1.30    1.40
   9   9  -2    1.00    4.20
  -9  -9   2    1.90    1.80
  -9  -9   2   -1.50    2.10
   8   9  -2   -3.00    3.00
   8   9  -2    5.60    1.00
   8   9  -2    6.30    2.40
   8   9  -2    4.70    2.20
  -8  -9   2    8.30    2.30
  -8  -9   2    7.60    3.40
   7   9  -2   21.40    3.60
   7   9  -2    8.50    4.20
  -7  -9   2   19.90    2.90
  -7  -9   2   19.20    4.10
   6   9  -2  273.07   11.50
   6   9  -2  284.87   18.70
   6   9  -2  281.67   10.90
  -6  -9   2  264.27   12.40
  -6  -9   2  260.37    9.40
   5   9  -2   58.09    4.90
   5   9  -2   62.39    7.10
   5   9  -2   59.49    4.80
   5   9  -2   60.49    5.10
  -5  -9   2   61.49    4.30
  -5  -9   2   50.49    5.20
   4   9  -2   52.69    6.20
   4   9  -2   53.49    4.70
   4   9  -2   54.69    4.60
   4   9  -2   50.79    4.50
  -4  -9   2   56.69    4.00
  -4  -9   2   52.89    5.00
   3   9  -2   88.69    7.00
   3   9  -2   84.19    5.60
   3   9  -2   81.89    5.30
   3   9  -2   92.19    5.30
  -3  -9   2   90.69    4.90
  -3  -9   2   90.39    3.20
  -3  -9   2   90.99    6.10
   2   9  -2    3.30    2.10
   2   9  -2    0.90    1.20
   2   9  -2    2.90    1.60
   2   9  -2    1.20    1.40
  -2  -9   2    1.40    1.30
  -2  -9   2    0.60    1.10
   1   9  -2    3.40    1.50
   1   9  -2    5.50    1.80
   1   9  -2    4.70    1.90
   1   9  -2    2.80    1.50
  -1  -9   2    2.60    1.40
  -1  -9   2    2.60    1.50
   0   9  -2   37.60    3.40
   0   9  -2   32.40    3.40
   0   9  -2   34.10    3.00
   0   9  -2   33.60    3.80
   0   9  -2   36.20    2.70
   0  -9   2   36.00    3.30
   0  -9   2   30.80    3.40
  -1   9  -2   13.00    2.80
  -1   9  -2   14.30    1.90
  -1   9  -2   10.60    1.80
  -1   9  -2   12.70    2.60
   1  -9   2   11.50    2.30
   1  -9   2    8.10    2.00
   1  -9   2   14.30    2.30
  -2   9  -2    1.40    1.40
  -2   9  -2    2.60    1.20
  -2   9  -2    1.20    1.50
  -2   9  -2    1.90    1.20
   2  -9   2    2.40    1.50
   2  -9   2    0.60    1.10
   2  -9   2    1.30    1.50
  -3   9  -2   25.80    3.20
  -3   9  -2   25.80    3.60
  -3   9  -2   28.70    2.60
  -3   9  -2   28.30    2.60
   3  -9   2   29.70    3.10
   3  -9   2   26.90    3.00
   3  -9   2   26.60    3.20
  -4   9  -2  111.99    4.90
  -4   9  -2  122.09    4.40
  -4   9  -2  115.79    6.40
   4  -9   2  118.59    6.30
   4  -9   2  120.79    5.90
   4  -9   2  110.29    5.80
   4  -9   2  119.49    4.80
  -5   9  -2   20.10    2.30
  -5   9  -2   15.30    3.00
  -5   9  -2   17.80    3.10
  -5   9  -2   20.50    1.90
   5  -9   2   17.50    2.20
   5  -9   2   20.10    2.90
   5  -9   2   16.60    3.10
  -6   9  -2   -1.10    0.80
  -6   9  -2   -0.50    1.30
  -6   9  -2    0.50    1.00
  -6   9  -2    0.80    1.50
   6  -9   2    1.50    1.60
   6  -9   2    1.30    1.20
   6  -9   2    1.10    1.20
  -7   9  -2    6.60    2.70
  -7   9  -2    4.30    2.50
  -7   9  -2    6.70    1.80
   7  -9   2    5.80    1.80
   7  -9   2    5.50    2.30
   7  -9   2    5.00    1.60
  -8   9  -2   31.20    2.90
  -8   9  -2   28.10    5.70
  -8   9  -2   24.70    4.00
   8  -9   2   27.40    2.90
   8  -9   2   30.20    4.60
  -9   9  -2    0.20    1.20
  -9   9  -2    1.80    2.10
  -9   9  -2   -3.00    2.10
   9  -9   2    1.00    1.40
   9  -9   2    0.50    1.00
   9  -9   2    0.90    1.20
   9  -9   2    1.60    2.10
 -10   9  -2   18.80    3.00
 -10   9  -2    8.20    4.20
 -10   9  -2    9.40    3.10
  10  -9   2   11.20    2.60
  10  -9   2   12.40    3.50
  10  -9   2   11.60    1.90
  10  -9   2   16.50    2.80
 -11   9  -2    2.70    3.90
 -11   9  -2   -1.20    1.80
 -11   9  -2   -1.60    1.20
  11  -9   2    2.10    1.70
  11  -9   2   -1.30    0.90
  11  -9   2    0.80    2.10
  11  -9   2    2.80    1.80
 -12   9  -2   14.40    3.70
 -12   9  -2   12.90    2.10
 -12   9  -2   17.20    5.20
 -12   9  -2   17.20    5.00
  12  -9   2   16.40    3.20
  12  -9   2    5.40    3.10
  12  -9   2   16.70    2.20
  12  -9   2   15.50    3.00
 -13   9  -2    9.40    2.90
 -13   9  -2    9.70    5.50
 -13   9  -2    5.10    1.50
 -13   9  -2    7.00    3.60
  13  -9   2    5.90    1.80
  13  -9   2    7.90    3.20
  13  -9   2    1.10    2.40
  13  -9   2    6.80    3.30
 -14   9  -2   10.90    2.00
 -14   9  -2   13.60    3.40
 -14   9  -2    6.20    6.40
  14  -9   2    9.90    4.30
  14  -9   2    8.20    2.80
  14  -9   2   10.10    3.40
  14  -9   2    7.90    2.00
  12   8  -2    1.40    2.10
 -12  -8   2   -3.50    3.00
 -12  -8   2    1.20    1.90
  11   8  -2   41.00    9.20
  11   8  -2   38.90    4.90
 -11  -8   2   32.20    6.30
 -11  -8   2   38.40    5.30
  10   8  -2   26.50    7.50
  10   8  -2   31.10    4.90
  10   8  -2   32.80    4.80
 -10  -8   2   34.90    5.10
 -10  -8   2   36.70    6.40
 -10  -8   2   27.30    4.90
   9   8  -2    0.60    1.90
   9   8  -2   -0.10    4.00
   9   8  -2    6.20    2.30
  -9  -8   2    1.00    1.40
  -9  -8   2    0.50    2.20
  -9  -8   2    0.80    1.70
   8   8  -2    3.10    2.20
   8   8  -2   10.90    4.60
   8   8  -2    4.40    2.10
  -8  -8   2    7.30    3.10
  -8  -8   2    4.20    1.80
  -8  -8   2    3.30    2.10
   7   8  -2   14.40    1.40
   7   8  -2   15.60    5.70
   7   8  -2   14.70    3.60
   7   8  -2   10.40    2.70
  -7  -8   2   15.80    3.30
  -7  -8   2   12.20    2.30
  -7  -8   2    9.70    3.10
   6   8  -2   53.69    4.90
   6   8  -2   59.99    7.50
   6   8  -2   64.09    5.00
  -6  -8   2   57.69    4.00
  -6  -8   2   57.39    5.70
  -6  -8   2   59.69    9.60
   5   8  -2   11.00    2.50
   5   8  -2   13.60    4.10
   5   8  -2   18.20    3.30
  -5  -8   2   15.60    2.30
  -5  -8   2   17.20    3.40
   4   8  -2   41.40    3.90
   4   8  -2   39.80    5.70
   4   8  -2   39.40    3.90
   4   8  -2   35.80    3.50
  -4  -8   2   39.70    3.30
  -4  -8   2   35.50    4.10
   3   8  -2   45.50    3.70
   3   8  -2   40.60    3.70
   3   8  -2   36.30    4.50
  -3  -8   2   42.90    3.20
  -3  -8   2   36.00    3.80
   2   8  -2   69.59    5.50
   2   8  -2   72.59    4.30
   2   8  -2   83.59    4.90
   2   8  -2   78.49    4.80
   2   8  -2   78.19    2.20
  -2  -8   2   77.79    4.30
  -2  -8   2   73.39    4.90
   1   8  -2    6.70    2.20
   1   8  -2   11.10    1.90
   1   8  -2    5.90    1.70
   1   8  -2    9.20    2.10
  -1  -8   2    9.80    2.00
  -1  -8   2    9.70    2.30
   0   8  -2    1.40    1.40
   0   8  -2    1.10    1.10
   0   8  -2   -0.10    0.80
   0   8  -2    2.90    1.30
   0   8  -2    2.10    1.30
   0  -8   2    2.20    1.20
   0  -8   2    1.40    1.30
   0  -8   2    0.80    1.00
  -1   8  -2  201.98    8.00
  -1   8  -2  201.08    6.90
  -1   8  -2  203.18    7.70
  -1   8  -2  205.48    6.00
   1  -8   2  204.78    7.30
   1  -8   2  201.08    7.70
   1  -8   2  200.58    7.50
  -2   8  -2   95.59    5.30
  -2   8  -2   95.99    4.40
  -2   8  -2  100.39    4.30
  -2   8  -2   96.39    5.20
   2  -8   2  102.39    5.30
   2  -8   2  100.79    5.20
   2  -8   2  103.29    5.10
  -3   8  -2  283.17    9.90
  -3   8  -2  292.47    7.40
  -3   8  -2  292.17    9.90
  -3   8  -2  280.77    8.20
  -3   8  -2  287.37    8.40
   3  -8   2  294.37    8.20
   3  -8   2  306.47    9.60
   3  -8   2  294.37    9.40
   3  -8   2  274.77    9.60
  -4   8  -2   45.90    2.50
  -4   8  -2   49.60    3.10
  -4   8  -2   47.50    4.10
  -4   8  -2   46.80    3.90
   4  -8   2   49.60    3.00
   4  -8   2   48.60    3.50
   4  -8   2   47.90    3.90
  -5   8  -2   36.60    3.60
  -5   8  -2   38.80    2.80
  -5   8  -2   39.70    2.50
   5  -8   2   33.40    3.00
   5  -8   2   32.50    3.50
   5  -8   2   31.60    2.60
  -6   8  -2  245.68   10.90
  -6   8  -2  240.18    7.20
  -6   8  -2  247.18    9.50
   6  -8   2  255.17   10.10
   6  -8   2  246.18    7.90
   6  -8   2  251.97    8.80
  -7   8  -2   11.10    2.70
  -7   8  -2   12.20    3.50
  -7   8  -2   12.50    2.00
   7  -8   2   13.00    1.90
   7  -8   2   15.40    2.30
   7  -8   2   13.70    2.40
   7  -8   2    6.20    2.30
  -8   8  -2    2.90    2.80
  -8   8  -2    1.80    1.30
  -8   8  -2    1.30    1.50
   8  -8   2    3.30    1.20
   8  -8   2    0.40    1.70
   8  -8   2    1.10    1.30
   8  -8   2    5.40    1.70
   8  -8   2    1.30    1.20
  -9   8  -2    0.30    2.30
  -9   8  -2    4.50    3.40
  -9   8  -2    0.30    1.30
   9  -8   2    0.50    1.00
   9  -8   2    1.50    2.10
   9  -8   2   -0.20    1.20
   9  -8   2    0.40    1.20
 -10   8  -2    5.80    2.40
 -10   8  -2    1.30    1.60
 -10   8  -2    2.70    3.50
  10  -8   2    1.80    1.60
  10  -8   2    4.90    1.80
  10  -8   2    1.30    2.10
  10  -8   2    2.00    1.30
 -11   8  -2   51.39    9.30
 -11   8  -2   56.29    3.30
 -11   8  -2   50.99    5.50
 -11   8  -2   57.29    4.70
  11  -8   2   61.69    6.40
  11  -8   2   57.09    3.60
  11  -8   2   61.69    4.70
  11  -8   2   56.49    4.90
 -12   8  -2    1.10    1.10
 -12   8  -2    3.90    2.60
 -12   8  -2   -7.60    3.00
 -12   8  -2    3.10    1.80
  12  -8   2    0.40    1.50
  12  -8   2    3.10    2.60
  12  -8   2    2.50    2.50
  12  -8   2    1.00    1.30
 -13   8  -2    7.70    5.40
 -13   8  -2   13.80    2.00
 -13   8  -2    7.20    3.30
 -13   8  -2   15.70    3.50
  13  -8   2   18.10    3.50
  13  -8   2   15.80    4.40
  13  -8   2   17.30    2.30
  13  -8   2   15.70    3.50
 -14   8  -2    2.80    1.20
 -14   8  -2    5.40    5.70
 -14   8  -2    0.20    2.10
  14  -8   2    0.50    1.60
  14  -8   2   -3.20    2.10
  14  -8   2   -0.70    2.70
  14  -8   2   -1.20    1.60
  13   7  -2    0.20    2.00
 -13  -7   2    0.20    3.70
 -13  -7   2    1.50    2.20
  12   7  -2   25.00    4.40
  12   7  -2   18.80    7.50
 -12  -7   2   20.00    3.60
 -12  -7   2   17.50    7.40
  11   7  -2    9.00    5.40
  11   7  -2    8.60    3.60
 -11  -7   2   14.50    3.00
 -11  -7   2   24.90    4.20
  10   7  -2    3.90    2.60
  10   7  -2    5.80    4.80
 -10  -7   2    8.60    3.70
 -10  -7   2    8.00    2.30
 -10  -7   2    5.30    2.40
   9   7  -2   86.19    6.20
   9   7  -2   90.79   10.70
   9   7  -2   87.79    6.80
  -9  -7   2   97.89    5.60
  -9  -7   2   94.99    6.70
  -9  -7   2  101.39    8.60
   8   7  -2    0.70    1.60
   8   7  -2   -0.10    2.00
  -8  -7   2    0.50    1.60
  -8  -7   2    2.70    2.30
  -8  -7   2    1.60    1.50
   7   7  -2   43.20    1.90
   7   7  -2   43.70    7.40
   7   7  -2   46.00    9.70
   7   7  -2   42.60    4.10
  -7  -7   2   36.80    3.30
  -7  -7   2   39.90    5.80
  -7  -7   2   42.30    4.30
   6   7  -2   73.49    5.40
   6   7  -2   65.69    4.60
   6   7  -2   61.49    7.00
  -6  -7   2   72.29    6.10
  -6  -7   2   66.59    4.10
  -6  -7   2   65.19    4.80
   5   7  -2   24.30    5.20
   5   7  -2   23.40    2.80
   5   7  -2   29.00    3.30
  -5  -7   2   24.70    2.50
  -5  -7   2   27.60    4.10
  -5  -7   2   27.60    3.10
   4   7  -2  197.78    7.90
   4   7  -2  187.78   10.10
  -4  -7   2  187.68    8.70
  -4  -7   2  181.58    6.60
  -4  -7   2  187.88    7.30
   3   7  -2    7.30    1.90
   3   7  -2    8.80    1.90
   3   7  -2    6.20    1.50
   3   7  -2    7.30    2.40
  -3  -7   2    9.50    2.40
  -3  -7   2    6.20    1.80
   2   7  -2   14.10    2.50
   2   7  -2    9.30    2.40
   2   7  -2   12.00    1.90
   2   7  -2   13.60    2.10
  -2  -7   2   12.10    2.40
   1   7  -2    4.00    1.40
   1   7  -2    3.10    1.40
   1   7  -2    2.40    1.60
   1   7  -2    3.30    1.30
  -1  -7   2    4.50    1.40
  -1  -7   2    3.50    1.50
   0   7  -2  706.83   15.20
   0   7  -2  690.93   16.80
   0   7  -2  725.53   16.20
   0   7  -2  688.83   17.60
   0   7  -2  704.93   17.00
   0  -7   2  720.93   16.70
   0  -7   2  719.23   16.70
   0  -7   2  707.73   17.20
  -1   7  -2  243.48    8.10
  -1   7  -2  251.87    6.40
  -1   7  -2  237.88    7.40
  -1   7  -2  250.37    7.20
  -1   7  -2  246.58    8.50
   1  -7   2  248.38    8.00
   1  -7   2  235.88    7.80
   1  -7   2  248.68    8.20
  -2   7  -2    5.30    1.40
  -2   7  -2    5.80    1.60
  -2   7  -2    7.90    1.40
  -2   7  -2    8.40    1.90
   2  -7   2    9.90    1.90
   2  -7   2    8.40    1.80
   2  -7   2    7.70    1.80
  -3   7  -2   34.70    3.20
  -3   7  -2   34.40    3.20
  -3   7  -2   36.60    2.50
  -3   7  -2   31.20    1.90
   3  -7   2   33.30    2.40
   3  -7   2   35.00    2.90
   3  -7   2   29.80    2.80
   3  -7   2   34.20    3.10
  -4   7  -2   66.49    3.40
  -4   7  -2   65.19    4.30
  -4   7  -2   64.99    4.50
  -4   7  -2   69.89    2.90
   4  -7   2   66.79    4.40
   4  -7   2   65.49    3.40
   4  -7   2   75.09    4.10
  -5   7  -2    7.00    1.40
  -5   7  -2    5.10    1.70
  -5   7  -2    6.00    1.30
  -5   7  -2    7.70    2.30
   5  -7   2    8.90    1.40
   5  -7   2    8.60    1.60
   5  -7   2    4.90    1.40
   5  -7   2    7.30    2.00
  -6   7  -2   81.49    3.80
  -6   7  -2   84.19    6.40
  -6   7  -2   81.59    5.10
   6  -7   2   80.99    3.70
   6  -7   2   80.79    5.30
   6  -7   2   82.09    4.40
   6  -7   2   74.69    4.00
  -7   7  -2   60.39    4.50
  -7   7  -2   58.39    6.10
  -7   7  -2   61.79    3.60
   7  -7   2   58.99    3.50
   7  -7   2   57.99    3.20
   7  -7   2   59.89    4.00
   7  -7   2   52.49    4.70
  -8   7  -2   67.49    7.10
  -8   7  -2   70.69    4.20
  -8   7  -2   57.49    4.90
   8  -7   2   65.59    4.30
   8  -7   2   77.19    4.40
   8  -7   2   65.39    5.60
   8  -7   2   76.09    3.80
  -9   7  -2    6.70    2.20
  -9   7  -2    3.30    3.20
  -9   7  -2    6.40    1.80
   9  -7   2    6.40    1.50
   9  -7   2    4.90    2.50
   9  -7   2    4.30    1.80
   9  -7   2    5.10    1.90
 -10   7  -2   -1.20    1.20
 -10   7  -2    0.50    1.80
 -10   7  -2   -0.40    0.90
 -10   7  -2    2.30    3.50
  10  -7   2    0.60    1.30
  10  -7   2    0.90    1.50
  10  -7   2   -1.80    1.70
  10  -7   2    2.20    1.30
 -11   7  -2   -1.30    1.50
 -11   7  -2   -2.80    3.30
 -11   7  -2    0.00    1.90
 -11   7  -2    1.20    1.10
  11  -7   2    0.50    1.80
  11  -7   2    0.20    1.80
  11  -7   2   -0.50    1.00
  11  -7   2    1.00    1.40
 -12   7  -2    4.30    4.00
 -12   7  -2    4.80    2.60
 -12   7  -2    1.10    2.10
 -12   7  -2    3.10    1.20
  12  -7   2    6.40    2.40
  12  -7   2    5.50    2.10
  12  -7   2    2.70    4.70
  12  -7   2    2.00    1.30
 -13   7  -2   51.99    5.10
 -13   7  -2   56.89    6.20
 -13   7  -2   48.80    3.00
 -13   7  -2   47.10    9.20
  13  -7   2   42.70    3.60
  13  -7   2   44.40    5.00
  13  -7   2   45.20    4.50
  13  -7   2   54.19    8.60
 -14   7  -2    8.60    6.00
 -14   7  -2   11.30    3.00
  14  -7   2   12.90    3.90
  14  -7   2    7.10    2.50
  14  -7   2   13.50    4.50
  14  -7   2   12.90    2.30
  13   6  -2   -1.60    2.00
 -13  -6   2    4.90    2.60
 -13  -6   2    9.00    4.20
  12   6  -2   15.40    6.80
  12   6  -2   40.90    4.80
 -12  -6   2   26.10    6.40
 -12  -6   2   41.00    4.50
 -12  -6   2   33.70    5.30
  11   6  -2   47.60    9.20
  11   6  -2   68.19    5.70
  11   6  -2   63.09    6.30
 -11  -6   2   58.09    5.70
 -11  -6   2   46.20    7.30
 -11  -6   2   69.59    5.30
  10   6  -2   22.40    6.80
  10   6  -2   37.60    4.30
 -10  -6   2   24.70    4.20
 -10  -6   2   24.80    5.50
 -10  -6   2   34.50    3.60
   9   6  -2  169.48   13.50
   9   6  -2  160.18    7.80
  -9  -6   2  149.59    8.30
  -9  -6   2  146.89    6.80
  -9  -6   2  150.78   10.50
   8   6  -2    1.00    1.60
   8   6  -2    0.00    1.30
   8   6  -2   -0.50    2.80
  -8  -6   2    0.90    1.30
  -8  -6   2   -2.10    1.50
  -8  -6   2   -0.60    1.30
   7   6  -2    1.10    1.50
   7   6  -2    1.80    2.90
  -7  -6   2    1.90    2.30
  -7  -6   2    1.30    1.20
  -7  -6   2    0.70    1.40
   6   6  -2    5.20    0.80
   6   6  -2    7.30    3.60
   6   6  -2    6.90    2.30
  -6  -6   2    4.90    2.30
  -6  -6   2    2.60    1.60
  -6  -6   2    4.30    1.50
   5   6  -2   18.20    2.60
   5   6  -2   28.70    3.90
   5   6  -2   17.90    4.30
  -5  -6   2   21.00    2.30
  -5  -6   2   22.00    3.60
  -5  -6   2   23.30    2.70
   4   6  -2   35.40    5.00
   4   6  -2   38.00    3.00
   4   6  -2   37.90    3.30
  -4  -6   2   41.30    3.90
  -4  -6   2   39.00    3.20
  -4  -6   2   39.20    2.90
   3   6  -2  978.20   21.80
   3   6  -2 1014.20   22.90
   3   6  -2 1008.70   22.30
   3   6  -2  983.80   25.00
  -3  -6   2 1014.50   21.70
  -3  -6   2  976.80   23.40
  -3  -6   2 1002.00   21.10
   2   6  -2   52.49    4.20
   2   6  -2   51.49    3.30
   2   6  -2   46.90    3.10
   2   6  -2   43.90    3.40
  -2  -6   2   51.69    3.70
  -2  -6   2   47.90    2.90
   1   6  -2    3.50    1.10
   1   6  -2    6.30    1.70
   1   6  -2    4.00    1.30
   1   6  -2    4.00    1.70
  -1  -6   2    3.10    1.10
  -1  -6   2    3.90    1.30
   0   6  -2   21.60    1.70
   0   6  -2   20.90    2.30
   0   6  -2   19.80    2.60
   0   6  -2   20.00    2.30
   0   6  -2   21.50    2.00
   0  -6   2   17.10    2.30
   0  -6   2   18.30    2.10
   0  -6   2   23.20    2.30
  -1   6  -2 2486.35   47.70
  -1   6  -2 2453.45   46.00
  -1   6  -2 2469.55   47.30
  -1   6  -2 2440.86   46.70
   1  -6   2 2470.15   47.30
   1  -6   2 2472.05   47.30
   1  -6   2 2484.65   47.30
  -2   6  -2  261.67    8.20
  -2   6  -2  263.37    7.20
  -2   6  -2  260.07    8.20
   2  -6   2  255.27    7.20
   2  -6   2  267.47    8.20
   2  -6   2  259.37    7.90
   2  -6   2  269.17    8.20
  -3   6  -2  161.78    4.40
  -3   6  -2  165.68    6.60
  -3   6  -2  164.68    6.30
  -3   6  -2  164.98    5.30
   3  -6   2  165.78    6.40
   3  -6   2  189.28    5.70
   3  -6   2  166.58    6.00
  -4   6  -2  353.36    8.30
  -4   6  -2  354.66    8.90
  -4   6  -2  354.16   10.40
  -4   6  -2  370.76   11.40
   4  -6   2  347.97    9.30
   4  -6   2  351.56   10.60
   4  -6   2  351.26    8.70
   4  -6   2  357.56    9.80
  -5   6  -2  141.79    4.80
  -5   6  -2  147.49    7.50
  -5   6  -2  134.59    6.00
   5  -6   2  141.29    4.80
   5  -6   2  146.29    5.60
   5  -6   2  143.79    4.80
  -6   6  -2   92.59    4.00
  -6   6  -2   75.29    4.70
   6  -6   2   82.99    3.70
   6  -6   2   81.19    3.90
   6  -6   2   74.89    5.10
   6  -6   2   77.99    4.10
  -7   6  -2   20.70    3.00
  -7   6  -2   21.30    2.40
  -7   6  -2   15.90    3.90
   7  -6   2   22.60    2.10
   7  -6   2   22.40    2.50
   7  -6   2   20.30    3.40
   7  -6   2   19.90    2.40
  -8   6  -2   52.39    3.80
  -8   6  -2   61.49    7.10
  -8   6  -2   53.49    4.30
   8  -6   2   48.70    3.50
   8  -6   2   55.39    3.80
   8  -6   2   46.60    4.70
   8  -6   2   50.99    3.20
  -9   6  -2  123.39    6.10
  -9   6  -2  130.19    7.00
  -9   6  -2  130.59    4.50
  -9   6  -2  124.59   10.60
   9  -6   2  130.69    8.10
   9  -6   2  135.09    5.40
   9  -6   2  125.69    6.20
   9  -6   2  131.39    6.00
 -10   6  -2   35.20    5.20
 -10   6  -2   33.10    2.40
 -10   6  -2   32.70    3.70
 -10   6  -2   37.90    7.60
  10  -6   2   33.30    5.20
  10  -6   2   31.80    3.40
  10  -6   2   29.20    2.90
  10  -6   2   38.10    3.90
 -11   6  -2   29.10    4.40
 -11   6  -2   25.50    6.70
 -11   6  -2   27.70    2.20
 -11   6  -2   35.00    4.10
  11  -6   2   31.60    3.50
  11  -6   2   28.20    4.10
  11  -6   2   27.30    2.90
  11  -6   2   34.90    5.70
 -12   6  -2    3.70    1.10
 -12   6  -2    2.20    4.40
 -12   6  -2    3.20    2.30
 -12   6  -2    3.90    2.30
  12  -6   2    4.60    2.20
  12  -6   2    5.90    2.00
  12  -6   2    4.00    1.50
 -13   6  -2   -4.70    3.60
 -13   6  -2    3.20    2.70
 -13   6  -2    0.50    1.90
 -13   6  -2    2.80    1.10
  13  -6   2    1.40    3.90
  13  -6   2   -0.70    1.50
  13  -6   2   -0.10    2.00
 -14   6  -2    2.60    2.10
 -14   6  -2    3.30    5.30
 -14   6  -2    6.50    3.20
  14  -6   2    1.60    2.10
  14  -6   2    6.80    2.10
  14  -6   2   -1.70    3.30
 -15   6  -2   -0.80    5.70
 -15   6  -2    4.70    2.90
  15  -6   2    9.90    2.70
  14   5  -2   -3.50    2.10
 -14  -5   2   -0.80    1.90
 -14  -5   2    4.30    4.10
  13   5  -2   39.20    4.90
  13   5  -2   36.70    8.50
 -13  -5   2   34.10    4.70
 -13  -5   2   32.10    2.40
  12   5  -2   43.20    8.10
  12   5  -2   48.90    4.90
  12   5  -2   37.60    6.00
 -12  -5   2   42.10    2.50
 -12  -5   2   34.60    4.50
 -12  -5   2   41.20    7.60
 -12  -5   2   34.40    5.20
  11   5  -2   31.10    6.40
  11   5  -2   26.20    3.80
  11   5  -2   43.80    8.40
 -11  -5   2   26.50    4.40
 -11  -5   2   26.50    2.00
 -11  -5   2   32.50    6.40
 -11  -5   2   29.90    3.50
  10   5  -2    7.30    2.40
  10   5  -2    1.80    3.50
 -10  -5   2    1.90    2.80
 -10  -5   2    5.50    2.00
 -10  -5   2    7.90    1.20
 -10  -5   2    9.20    2.70
   9   5  -2    0.10    1.30
   9   5  -2   -4.00    3.00
  -9  -5   2    0.40    1.50
  -9  -5   2   -0.40    0.60
  -9  -5   2   -0.50    1.20
   8   5  -2   30.10    3.20
   8   5  -2   24.10    3.80
   8   5  -2   33.40    6.90
  -8  -5   2   27.90    2.90
  -8  -5   2   33.80    4.60
  -8  -5   2   28.80    5.20
  -8  -5   2   29.90    1.50
   7   5  -2    7.10    2.70
   7   5  -2    9.00    2.00
   7   5  -2   10.40    4.20
  -7  -5   2    9.40    3.20
  -7  -5   2    6.40    1.80
  -7  -5   2    8.20    1.80
   6   5  -2  119.19    3.00
   6   5  -2  117.79    6.40
   6   5  -2  115.99    5.40
   6   5  -2  110.19    8.60
  -6  -5   2  113.59    6.00
  -6  -5   2  110.39    7.30
  -6  -5   2  113.59    4.80
   5   5  -2  351.76   11.10
   5   5  -2  354.86   14.60
   5   5  -2  361.76   10.30
  -5  -5   2  369.56   11.10
  -5  -5   2  377.96   13.30
  -5  -5   2  375.76    9.70
   4   5  -2  143.99    5.60
   4   5  -2  160.98    6.50
   4   5  -2  142.39    8.20
  -4  -5   2  148.19    5.10
  -4  -5   2  152.48    6.00
  -4  -5   2  146.19    7.10
   3   5  -2   45.90    2.90
   3   5  -2   45.80    3.20
   3   5  -2   48.30    4.50
  -3  -5   2   44.50    2.70
  -3  -5   2   43.90    3.00
  -3  -5   2   45.00    3.70
   2   5  -2    0.70    1.20
   2   5  -2    0.90    0.90
   2   5  -2   -0.20    1.00
   2   5  -2    0.20    0.80
  -2  -5   2   -0.70    0.80
  -2  -5   2    0.30    0.80
  -2  -5   2   -0.40    0.60
   1   5  -2  129.99    6.20
   1   5  -2  131.89    5.50
   1   5  -2  134.09    4.90
  -1  -5   2  128.89    4.60
  -1  -5   2  139.09    5.30
   0   5  -2  501.85   10.30
   0   5  -2  476.85   11.90
   0   5  -2  484.85   11.90
   0   5  -2  480.25   11.20
   0   5  -2  488.95   11.60
   0  -5   2  482.45   11.70
   0  -5   2  480.35   11.30
   0  -5   2  486.85   11.80
  -1   5  -2   18.10    1.80
  -1   5  -2   18.40    2.00
  -1   5  -2   17.40    2.00
  -1   5  -2   18.40    2.10
   1  -5   2   18.90    2.00
   1  -5   2   19.00    1.80
   1  -5   2   21.70    2.10
   1  -5   2   18.30    2.10
  -2   5  -2   -1.20    0.80
  -2   5  -2    0.50    0.90
  -2   5  -2    0.10    0.50
   2  -5   2   -0.40    0.70
   2  -5   2    0.70    1.00
   2  -5   2    0.50    0.70
   2  -5   2   -0.50    0.70
  -3   5  -2   62.19    3.90
  -3   5  -2   59.09    3.40
   3  -5   2   53.49    3.40
   3  -5   2   64.99    3.20
   3  -5   2   64.59    2.90
   3  -5   2   63.29    3.10
  -4   5  -2   65.89    4.50
  -4   5  -2   66.89    3.80
  -4   5  -2   68.39    2.80
   4  -5   2   62.39    2.70
   4  -5   2   70.99    3.10
   4  -5   2   60.79    3.30
   4  -5   2   65.09    4.00
  -5   5  -2   41.20    4.40
  -5   5  -2   47.20    3.30
  -5   5  -2   44.40    2.60
   5  -5   2   43.20    2.50
   5  -5   2   46.50    2.60
   5  -5   2   45.70    3.70
   5  -5   2   46.20    2.90
  -6   5  -2  524.45   17.60
  -6   5  -2  528.55   12.80
  -6   5  -2  521.15   13.90
   6  -5   2  540.75   12.30
   6  -5   2  530.65   12.90
   6  -5   2  504.65   15.10
   6  -5   2  554.64   13.20
  -7   5  -2   15.60    2.50
  -7   5  -2   21.60    2.50
  -7   5  -2   17.00    3.90
   7  -5   2   18.70    2.00
   7  -5   2   20.60    2.40
   7  -5   2   21.10    2.30
   7  -5   2   17.00    3.30
  -8   5  -2   66.39    4.60
  -8   5  -2   60.69    7.40
  -8   5  -2   67.89    2.90
  -8   5  -2   64.99    4.20
   8  -5   2   62.19    3.50
   8  -5   2   70.29    4.10
   8  -5   2   66.79    4.30
   8  -5   2   61.49    5.40
  -9   5  -2   39.30    3.70
  -9   5  -2   29.50    2.10
  -9   5  -2   23.90    4.70
  -9   5  -2   31.60    6.70
   9  -5   2   32.10    4.80
   9  -5   2   29.00    2.60
   9  -5   2   29.60    3.00
   9  -5   2   36.50    3.60
 -10   5  -2   77.29    5.30
 -10   5  -2   90.39    6.50
 -10   5  -2   79.09    3.30
 -10   5  -2   76.89    9.50
  10  -5   2   78.49    4.30
  10  -5   2   86.09    7.20
  10  -5   2   73.09    4.70
  10  -5   2   71.09    5.20
 -11   5  -2   -1.20    1.50
 -11   5  -2   -1.80    0.70
 -11   5  -2   -0.50    3.70
  11  -5   2    1.60    1.70
  11  -5   2   -1.00    1.00
  11  -5   2   -2.50    1.00
  11  -5   2   -4.00    1.70
 -12   5  -2   43.10    4.80
 -12   5  -2   37.00    4.40
 -12   5  -2   36.50    2.30
 -12   5  -2   22.30    7.10
  12  -5   2   44.00    4.80
  12  -5   2   43.90    3.50
  12  -5   2   43.70   10.30
  12  -5   2   38.60    4.00
 -13   5  -2    0.70    2.90
 -13   5  -2    4.70    2.40
 -13   5  -2   -2.00    4.40
  13  -5   2    2.90    3.30
  13  -5   2    4.30    1.70
  13  -5   2    1.40    2.20
  13  -5   2    2.90    1.90
 -14   5  -2   -0.50    4.80
 -14   5  -2    1.10    2.20
 -14   5  -2    2.60    2.40
  14  -5   2    2.00    1.80
  14  -5   2    3.20    3.70
  14  -5   2    4.70    2.80
  14  -5   2    4.20    2.20
 -15   5  -2   -4.60    5.10
 -15   5  -2    4.20    2.50
  15  -5   2   -1.10    3.90
  14   4  -2   12.90    3.30
 -14  -4   2   17.30    5.90
 -14  -4   2   15.10    2.40
 -14  -4   2   11.40    3.10
  13   4  -2    5.40    4.70
  13   4  -2   -1.10    1.60
 -13  -4   2    1.10    4.00
 -13  -4   2   -2.00    1.00
 -13  -4   2   -0.50    1.70
 -13  -4   2   -0.40    2.00
  12   4  -2   -6.10    2.70
  12   4  -2    0.30    2.40
  12   4  -2    1.30    2.00
 -12  -4   2    0.80    3.20
 -12  -4   2    0.70    1.00
 -12  -4   2    2.70    1.90
 -12  -4   2    1.20    2.10
  11   4  -2   55.69    5.80
  11   4  -2   37.20    7.30
  11   4  -2   49.50    4.60
 -11  -4   2   40.70    7.30
 -11  -4   2   44.40    4.20
 -11  -4   2   48.90    5.20
  10   4  -2  122.89    6.60
 -10  -4   2  120.99    7.60
 -10  -4   2  120.59   10.30
 -10  -4   2  122.29    6.20
   9   4  -2   20.60    2.90
   9   4  -2   27.10    5.90
  -9  -4   2   25.50    5.20
  -9  -4   2   23.00    3.00
  -9  -4   2   21.40    3.50
   8   4  -2   51.39    4.70
   8   4  -2   39.30    6.60
   8   4  -2   48.50    3.80
  -8  -4   2   50.99    3.60
  -8  -4   2   66.09    6.80
  -8  -4   2   58.19    4.80
   7   4  -2    7.10    3.30
   7   4  -2   10.50    2.70
   7   4  -2    7.10    1.70
  -7  -4   2    9.20    2.10
  -7  -4   2   10.10    1.80
  -7  -4   2    8.40    3.00
   6   4  -2  139.99    9.50
   6   4  -2  144.79    5.90
   6   4  -2  130.59    6.50
  -6  -4   2  135.99    6.40
  -6  -4   2  136.99    8.20
  -6  -4   2  146.39    5.30
   5   4  -2   -0.20    1.20
   5   4  -2    0.20    0.40
   5   4  -2    0.60    0.80
   5   4  -2   -0.10    1.70
  -5  -4   2    0.10    1.50
  -5  -4   2   -0.10    0.80
  -5  -4   2    0.20    1.40
   4   4  -2  323.07    8.70
   4   4  -2  306.87   12.10
   4   4  -2  335.67    9.70
  -4  -4   2  326.47    8.30
  -4  -4   2  331.57    9.50
  -4  -4   2  333.67   11.30
   3   4  -2  379.76   12.20
   3   4  -2  386.56   10.20
  -3  -4   2  375.06    9.00
  -3  -4   2  392.96   10.00
  -3  -4   2  378.56   11.30
   2   4  -2  223.18    7.80
   2   4  -2  230.48    6.60
   2   4  -2  224.18    6.30
   2   4  -2  235.58    8.20
  -2  -4   2  222.28    7.20
  -2  -4   2  236.18    6.50
  -2  -4   2  228.88    6.00
   1   4  -2 2677.73   50.89
   1   4  -2 2694.13   49.80
   1   4  -2 2700.13   50.79
  -1  -4   2 2701.83   50.59
  -1  -4   2 2708.03   50.49
  -1  -4   2 2780.62   49.70
   0   4  -2 1072.99   21.30
   0   4  -2  987.20   21.10
   0   4  -2 1077.69   21.60
   0   4  -2 1125.79   20.20
   0   4  -2 1091.09   20.90
   0   4  -2 1073.69   21.90
   0  -4   2 1069.29   22.20
   0  -4   2 1092.29   21.50
   0  -4   2 1084.89   21.20
  -1   4  -2 2745.63   51.09
  -1   4  -2 2810.52   50.79
  -1   4  -2 2807.12   51.49
  -1   4  -2 2817.52   51.39
  -1   4  -2 2735.93   49.40
   1  -4   2 2819.92   54.79
   1  -4   2 2753.72   50.79
   1  -4   2 2862.91   51.39
   1  -4   2 2702.73   51.09
   1  -4   2 2800.32   51.09
  -2   4  -2   15.00    1.50
  -2   4  -2   14.60    1.80
  -2   4  -2   16.60    1.80
  -2   4  -2   17.50    0.90
   2  -4   2   17.40    2.00
   2  -4   2   15.00    1.70
   2  -4   2   17.70    2.20
   2  -4   2   16.20    1.50
  -3   4  -2   34.90    2.40
  -3   4  -2   34.50    1.70
  -3   4  -2   31.10    3.00
   3  -4   2   33.10    2.00
   3  -4   2   32.40    2.20
   3  -4   2   34.70    2.70
   3  -4   2   32.00    1.70
  -4   4  -2  199.48    8.20
  -4   4  -2  207.98    5.70
  -4   4  -2  195.08    6.40
   4  -4   2  204.98    7.40
   4  -4   2  194.88    5.90
   4  -4   2  200.08    5.60
   4  -4   2  205.68    5.70
  -5   4  -2  132.79    5.20
  -5   4  -2  132.99    7.50
  -5   4  -2  125.49    4.70
   5  -4   2  120.39    4.30
   5  -4   2  128.09    4.70
   5  -4   2  125.39    6.10
   5  -4   2  115.29    4.50
  -6   4  -2   14.10    2.10
  -6   4  -2   15.00    3.70
  -6   4  -2   14.00    2.10
   6  -4   2   21.20    2.10
   6  -4   2   12.80    1.80
   6  -4   2   13.60    1.70
   6  -4   2   16.10    2.90
  -7   4  -2   11.50    3.80
  -7   4  -2   10.80    2.10
  -7   4  -2   12.20    1.30
  -7   4  -2   14.60    2.30
   7  -4   2   12.90    2.30
   7  -4   2   12.90    2.00
   7  -4   2   10.60    2.70
  -8   4  -2  118.69   10.00
  -8   4  -2  111.19    3.70
  -8   4  -2   98.59    5.40
  -8   4  -2  113.79    5.70
   8  -4   2  123.79    7.70
   8  -4   2  110.09    5.60
   8  -4   2  114.29    5.20
  -9   4  -2    9.00    4.30
  -9   4  -2    4.50    1.80
  -9   4  -2    6.40    1.10
  -9   4  -2    4.00    2.10
   9  -4   2    6.10    2.10
   9  -4   2    5.00    2.80
   9  -4   2    4.50    1.50
 -10   4  -2   84.39    5.60
 -10   4  -2   83.09    5.60
 -10   4  -2   86.09    3.20
 -10   4  -2   83.29    9.60
  10  -4   2   77.69    7.40
  10  -4   2   79.59    5.70
 -11   4  -2   12.40    5.10
 -11   4  -2   20.00    3.30
 -11   4  -2   23.70    1.70
 -11   4  -2   25.10    3.90
  11  -4   2   24.60    5.00
  11  -4   2   18.90    4.40
  11  -4   2   22.50    3.10
 -12   4  -2    5.90    2.30
 -12   4  -2   -2.20    3.90
 -12   4  -2    9.10    2.80
  12  -4   2    5.10    3.50
  12  -4   2    6.30    2.50
  12  -4   2    3.50    1.80
 -13   4  -2   10.20    3.10
 -13   4  -2   16.00    4.10
 -13   4  -2   15.50    6.20
  13  -4   2   13.10    3.40
  13  -4   2   15.60    4.90
  13  -4   2   14.00    3.00
 -14   4  -2   10.70    5.50
 -14   4  -2   11.00    3.20
 -14   4  -2   14.40    3.90
  14  -4   2   14.30    4.60
  14  -4   2   13.00    3.20
  14  -4   2   11.40    2.60
  14  -4   2   12.30    3.00
 -15   4  -2   -2.90    1.90
 -15   4  -2    5.60    5.70
  15  -4   2    4.20    2.30
  15  -4   2    3.60    5.90
 -15  -3   2   19.80    2.70
  14   3  -2   23.40    6.40
  14   3  -2   19.60    3.70
 -14  -3   2   10.90    2.00
 -14  -3   2    9.60    4.90
 -14  -3   2   10.40    3.10
  13   3  -2   -0.10    1.60
  13   3  -2   -1.30    3.50
 -13  -3   2    3.00    3.60
 -13  -3   2   -0.50    2.10
 -13  -3   2    2.60    2.20
  12   3  -2   12.20    2.70
  12   3  -2   14.40    5.20
  12   3  -2    6.70    2.80
 -12  -3   2   10.60    3.10
 -12  -3   2   13.10    4.70
 -12  -3   2   13.80    2.80
  11   3  -2    7.40    2.70
  11   3  -2    8.40    2.40
  11   3  -2    8.50    4.30
 -11  -3   2   12.20    2.50
 -11  -3   2    4.50    3.30
 -11  -3   2    6.60    2.50
  10   3  -2    1.70    1.70
  10   3  -2    1.40    3.10
  10   3  -2    0.70    1.30
 -10  -3   2    0.50    1.70
 -10  -3   2    1.00    1.40
   9   3  -2    5.80    3.60
   9   3  -2    0.90    1.20
  -9  -3   2    1.00    2.20
  -9  -3   2    2.20    1.40
  -9  -3   2    1.70    1.70
   8   3  -2  233.98   13.40
   8   3  -2  242.38    8.30
  -8  -3   2  241.58   12.70
  -8  -3   2  236.08    7.90
  -8  -3   2  230.28    9.50
   7   3  -2   63.19    4.60
   7   3  -2   59.89    3.70
   7   3  -2   70.19    7.20
  -7  -3   2   58.79    6.10
  -7  -3   2   65.69    3.50
  -7  -3   2   61.99    4.50
   6   3  -2  308.97   10.10
   6   3  -2  297.17   13.50
   6   3  -2  292.07    8.40
  -6  -3   2  298.97    9.90
  -6  -3   2  294.57    8.20
  -6  -3   2  291.67   12.30
   5   3  -2  779.52   17.20
   5   3  -2  795.32   23.10
   5   3  -2  822.72   19.20
  -5  -3   2  820.32   18.90
  -5  -3   2  766.72   21.60
  -5  -3   2  827.62   17.00
   4   3  -2  272.87    8.40
   4   3  -2  290.97    5.70
   4   3  -2  262.47   10.90
   4   3  -2  284.57    7.40
  -4  -3   2  282.67   10.30
  -4  -3   2  284.67    8.40
  -4  -3   2  280.57    7.10
   3   3  -2    4.90    0.60
   3   3  -2    4.30    2.10
   3   3  -2    5.70    1.50
   3   3  -2    3.60    0.90
  -3  -3   2    4.40    0.80
  -3  -3   2    5.40    1.50
  -3  -3   2    2.90    1.40
   2   3  -2  286.97    8.80
   2   3  -2  306.47    7.60
   2   3  -2  300.07    7.10
  -2  -3   2  320.97    7.60
  -2  -3   2  289.77    6.80
  -2  -3   2  302.77    5.80
  -2  -3   2  308.17    8.40
   1   3  -2 1816.82   31.80
   1   3  -2 1727.13   33.90
   1   3  -2 1745.53   33.60
  -1  -3   2 1755.42   32.60
  -1  -3   2 1797.92   33.40
  -1  -3   2 1821.72   33.90
   0   3  -2  522.85    9.90
   0   3  -2  512.75    9.70
   0   3  -2  512.15   11.00
   0   3  -2  519.55   11.50
   0   3  -2  515.95   10.90
   0   3  -2  507.45   10.60
   0  -3   2  502.45    9.60
   0  -3   2  530.85    9.80
   0  -3   2  527.35   11.60
   0  -3   2  507.15   10.60
   0  -3   2  507.05   10.70
   0  -3   2  515.45    9.90
   0  -3   2  510.05   10.90
  -1   3  -2 1387.76   26.30
  -1   3  -2 1362.06   26.10
  -1   3  -2 1353.56   25.90
  -1   3  -2 1430.56   25.20
  -1   3  -2 1383.06   25.20
   1  -3   2 1413.96   25.40
   1  -3   2 1382.66   26.30
   1  -3   2 1365.56   26.20
   1  -3   2 1378.76   25.90
   1  -3   2 1363.86   25.90
  -2   3  -2   75.59    3.00
  -2   3  -2   82.69    3.70
  -2   3  -2   77.99    2.50
  -2   3  -2   79.19    2.90
   2  -3   2   77.59    2.90
   2  -3   2   72.79    3.30
   2  -3   2   81.89    2.20
   2  -3   2   76.99    2.80
  -3   3  -2    2.30    0.70
  -3   3  -2    2.60    1.00
  -3   3  -2   -0.30    1.10
   3  -3   2    0.90    0.70
   3  -3   2    0.50    0.70
   3  -3   2    1.00    0.70
   3  -3   2   -0.10    0.90
  -4   3  -2  233.08    9.30
  -4   3  -2  257.27    6.50
  -4   3  -2  211.08    6.50
   4  -3   2  211.38    6.20
   4  -3   2  247.98    7.90
   4  -3   2  216.48    8.00
  -5   3  -2  260.17    6.00
  -5   3  -2  260.67    7.40
  -5   3  -2  235.58    7.30
  -5   3  -2  246.28   11.00
   5  -3   2  241.78    9.30
   5  -3   2  245.08    7.00
   5  -3   2  253.67    7.40
  -6   3  -2    7.00    1.50
  -6   3  -2    6.70    1.50
  -6   3  -2    8.40    3.00
  -6   3  -2    9.60    1.30
   6  -3   2    6.70    1.70
   6  -3   2    8.30    2.40
   6  -3   2    7.80    1.50
  -7   3  -2   62.59    4.00
  -7   3  -2   62.59    3.90
  -7   3  -2   58.89    2.40
  -7   3  -2   55.99    6.60
   7  -3   2   56.79    3.90
   7  -3   2   60.39    3.50
   7  -3   2   60.39    5.50
  -8   3  -2   31.60    5.90
  -8   3  -2   30.30    3.30
  -8   3  -2   32.70    1.80
  -8   3  -2   24.00    2.80
   8  -3   2   29.80    4.80
   8  -3   2   27.30    3.20
   8  -3   2   29.60    2.70
  -9   3  -2    3.90    3.40
  -9   3  -2    2.10    1.50
  -9   3  -2    2.10    1.50
  -9   3  -2    1.70    0.70
   9  -3   2    1.70    1.20
   9  -3   2    4.20    1.70
   9  -3   2    6.10    2.90
 -10   3  -2   90.29    5.90
 -10   3  -2  112.59   11.10
 -10   3  -2   96.99    6.00
  10  -3   2   93.59    8.10
  10  -3   2   99.99    6.30
 -11   3  -2   13.10    5.30
 -11   3  -2   22.20    3.70
 -11   3  -2   27.60    3.90
  11  -3   2   29.80    3.30
  11  -3   2   25.70    5.20
  11  -3   2   25.60    4.40
 -12   3  -2   54.29    9.60
 -12   3  -2   55.59    5.20
 -12   3  -2   42.40    4.70
  12  -3   2   41.30    4.10
  12  -3   2   44.90    5.10
  12  -3   2   42.10    6.80
 -13   3  -2   12.50    5.00
 -13   3  -2    9.70    3.20
 -13   3  -2    8.80    2.80
  13  -3   2    5.20    4.00
  13  -3   2    7.20    2.40
  13  -3   2    6.40    3.00
 -14   3  -2   20.20    4.10
 -14   3  -2   18.60    7.00
 -14   3  -2   23.90    4.10
  14  -3   2   19.60    4.30
  14  -3   2   24.30    5.70
  14  -3   2   19.00    3.50
  15   2  -2   -1.30    1.90
 -15  -2   2   -3.00    4.10
 -15  -2   2    5.50    2.90
  14   2  -2    7.10    2.60
  14   2  -2    7.10    5.30
 -14  -2   2    1.40    4.60
 -14  -2   2    2.40    2.40
 -14  -2   2    9.10    2.70
  13   2  -2    4.00    2.00
  13   2  -2   11.20    3.60
  13   2  -2    8.70    4.20
 -13  -2   2    6.60    4.50
 -13  -2   2    7.20    2.60
 -13  -2   2    2.30    2.90
  12   2  -2    4.90    2.70
  12   2  -2    5.80    2.10
  12   2  -2    3.30    3.70
 -12  -2   2   -2.60    2.80
 -12  -2   2    9.30    2.80
  11   2  -2  108.19    6.00
  11   2  -2   97.69    7.20
  11   2  -2  103.19   10.00
 -11  -2   2  107.19    6.00
 -11  -2   2  122.09   10.80
 -11  -2   2   92.69    6.70
  10   2  -2   -0.20    1.20
  10   2  -2   -1.20    2.40
  10   2  -2    1.30    1.70
 -10  -2   2   -0.60    1.20
 -10  -2   2    0.60    2.30
 -10  -2   2    0.00    1.30
   9   2  -2   76.39    8.00
   9   2  -2   85.09    6.10
   9   2  -2   89.09    4.90
  -9  -2   2   91.09    6.00
  -9  -2   2   94.89    8.70
  -9  -2   2   88.59    4.90
   8   2  -2  111.89    8.80
   8   2  -2  113.69    5.20
   8   2  -2  120.09    6.60
  -8  -2   2  111.19    6.30
  -8  -2   2  122.79    5.30
  -8  -2   2  123.99    9.30
   7   2  -2   72.99    7.00
   7   2  -2   75.09    4.80
   7   2  -2   69.69    3.70
  -7  -2   2   65.99    3.60
  -7  -2   2   68.59    4.60
  -7  -2   2   66.09    6.60
   6   2  -2  127.29    6.00
   6   2  -2  132.69    4.90
   6   2  -2  133.79    8.50
  -6  -2   2  127.89    8.10
  -6  -2   2  135.39    4.80
  -6  -2   2  137.29    6.10
   5   2  -2  246.28    8.20
   5   2  -2  253.97    6.90
   5   2  -2  248.58   11.00
  -5  -2   2  254.77    8.30
  -5  -2   2  248.28   10.60
  -5  -2   2  249.68    6.80
   4   2  -2    1.90    2.10
   4   2  -2    1.80    0.80
   4   2  -2    4.10    1.30
  -4  -2   2    3.80    1.40
  -4  -2   2    3.50    0.80
  -4  -2   2    3.60    2.00
   3   2  -2    2.00    0.70
   3   2  -2    1.60    1.00
   3   2  -2    1.50    0.40
   3   2  -2    2.70    1.70
  -3  -2   2    1.70    0.60
  -3  -2   2    3.90    1.10
  -3  -2   2    4.20    1.70
   2   2  -2  426.86   10.80
   2   2  -2  431.26    9.50
   2   2  -2  413.66    8.10
  -2  -2   2  432.06    9.50
  -2  -2   2  405.96    8.50
   1   2  -2  266.77    5.90
   1   2  -2  273.77    5.40
   1   2  -2  257.37    5.30
   1   2  -2  257.27    6.10
   1   2  -2  252.47    6.60
   1   2  -2  261.27    6.20
   1   2  -2  259.97    5.80
  -1  -2   2  247.18    5.40
  -1  -2   2  256.47    6.00
  -1  -2   2  266.47    5.90
  -1  -2   2  255.77    5.30
  -1  -2   2  261.97    6.60
   0   2  -2  709.53   14.10
   0   2  -2  705.93   12.90
   0   2  -2  707.53   13.40
   0   2  -2  708.63   13.40
   0   2  -2  726.23   13.50
   0   2  -2  713.33   13.30
   0   2  -2  717.53   14.50
   0   2  -2  714.63   13.80
   0  -2   2  732.73   13.50
   0  -2   2  716.53   12.90
   0  -2   2  709.13   13.70
   0  -2   2  691.03   14.10
   0  -2   2  696.53   14.50
   0  -2   2  701.23   13.30
   0  -2   2  700.53   13.40
   0  -2   2  700.43   13.30
  -1   2  -2   11.70    1.00
  -1   2  -2   11.30    1.20
  -1   2  -2   13.60    0.90
  -1   2  -2   14.00    1.30
  -1   2  -2   10.80    1.10
   1  -2   2   12.10    1.30
   1  -2   2   13.20    1.30
   1  -2   2   10.60    1.00
  -2   2  -2   48.30    1.80
  -2   2  -2   45.50    1.60
  -2   2  -2   40.90    2.10
   2  -2   2   45.90    1.90
   2  -2   2   44.20    2.70
  -3   2  -2  161.18    4.80
  -3   2  -2  185.78    5.00
  -3   2  -2  175.88    4.10
   3  -2   2  163.58    6.40
   3  -2   2  174.98    5.00
  -4   2  -2  750.42   14.20
  -4   2  -2  737.83   20.30
  -4   2  -2  721.03   15.70
  -4   2  -2  743.83   15.60
   4  -2   2  730.13   18.60
   4  -2   2  757.92   16.00
   4  -2   2  725.83   15.30
  -5   2  -2  205.88    6.40
  -5   2  -2  211.48    6.80
  -5   2  -2  221.98   10.60
  -5   2  -2  208.08    4.90
   5  -2   2  205.48    8.90
   5  -2   2  215.38    6.90
   5  -2   2  203.18    6.10
  -6   2  -2   26.70    2.60
  -6   2  -2   28.60    2.40
  -6   2  -2   30.00    5.90
  -6   2  -2   29.60    1.50
   6  -2   2   25.80    2.60
   6  -2   2   32.90    4.10
   6  -2   2   26.80    2.20
  -7   2  -2   21.20    1.40
  -7   2  -2   21.00    4.90
  -7   2  -2   16.10    2.30
  -7   2  -2   20.90    2.90
   7  -2   2   23.10    2.80
   7  -2   2   25.30    4.40
   7  -2   2   25.40    2.40
  -8   2  -2   11.90    4.40
  -8   2  -2   10.70    2.10
  -8   2  -2   10.10    1.10
  -8   2  -2   10.90    2.30
   8  -2   2    8.20    3.20
   8  -2   2    8.90    2.20
   8  -2   2    9.50    1.80
  -9   2  -2  287.77   10.30
  -9   2  -2  269.57   15.80
  -9   2  -2  280.67    9.70
   9  -2   2  265.57   10.40
   9  -2   2  277.77    9.20
   9  -2   2  281.77   13.70
 -10   2  -2    5.80    3.30
 -10   2  -2    6.20    2.10
 -10   2  -2    7.70    4.20
  10  -2   2    9.30    2.70
  10  -2   2    5.50    3.20
 -11   2  -2    3.60    1.90
 -11   2  -2    4.90    4.20
 -11   2  -2    1.00    1.70
  11  -2   2    3.90    1.70
  11  -2   2    3.20    3.10
  11  -2   2    2.90    2.20
 -12   2  -2    8.90    2.50
 -12   2  -2   11.40    5.00
 -12   2  -2   10.90    3.00
  12  -2   2    5.50    2.60
  12  -2   2   10.20    4.20
  12  -2   2    6.90    2.30
 -13   2  -2   46.80    9.20
 -13   2  -2   64.29    6.30
 -13   2  -2   54.99    5.70
  13  -2   2   49.10    7.90
  13  -2   2   52.69    5.90
  13  -2   2   56.79    4.90
 -14   2  -2   -3.80    1.90
 -14   2  -2    8.80    5.50
 -14   2  -2    1.50    2.40
  14  -2   2    5.90    3.90
  14  -2   2    2.50    2.10
  15   1  -2   19.80    3.60
 -15  -1   2   15.00    5.80
 -15  -1   2   15.00    3.90
  14   1  -2   15.30    3.30
  14   1  -2    8.50    4.80
 -14  -1   2   15.00    3.60
 -14  -1   2   16.50    3.60
 -14  -1   2   16.30    5.90
  13   1  -2   12.70    2.90
  13   1  -2    2.80    3.50
  13   1  -2    5.50    2.70
 -13  -1   2    3.50    3.10
 -13  -1   2    5.00    2.70
 -13  -1   2    4.40    4.30
  12   1  -2    0.20    1.90
  12   1  -2    0.70    1.50
  12   1  -2   -0.70    2.70
 -12  -1   2    1.60    1.80
 -12  -1   2    4.30    3.70
 -12  -1   2    2.20    1.90
  11   1  -2    0.20    1.20
  11   1  -2    3.60    3.70
  11   1  -2   -0.20    1.50
 -11  -1   2   -0.10    1.70
 -11  -1   2   -1.50    2.60
 -11  -1   2   -0.40    1.40
  10   1  -2   77.39    4.70
  10   1  -2   67.79    5.60
 -10  -1   2   77.49    4.80
 -10  -1   2   73.09    5.70
 -10  -1   2   74.19    8.50
   9   1  -2  132.29    7.30
   9   1  -2  114.29    9.00
   9   1  -2  130.59    5.80
  -9  -1   2  141.89    6.00
  -9  -1   2  128.69    7.00
  -9  -1   2  145.09   10.80
   8   1  -2  444.16   17.20
   8   1  -2  448.16   13.80
   8   1  -2  451.85   11.90
  -8  -1   2  443.16   13.80
  -8  -1   2  440.86   18.30
  -8  -1   2  461.05   12.10
   7   1  -2   39.40    3.60
   7   1  -2   41.60    2.70
   7   1  -2   39.50    4.90
  -7  -1   2   33.60    5.30
  -7  -1   2   41.70    2.80
  -7  -1   2   35.70    3.30
   6   1  -2   35.40    3.30
   6   1  -2   32.80    4.80
   6   1  -2   38.60    2.50
  -6  -1   2   37.40    3.40
  -6  -1   2   33.30    5.00
  -6  -1   2   36.10    2.50
   5   1  -2  148.59    4.70
   5   1  -2  155.38    8.10
   5   1  -2  161.58    6.10
  -5  -1   2  157.68    4.90
  -5  -1   2  161.18    8.50
   4   1  -2   15.60    1.30
   4   1  -2   18.90    2.40
   4   1  -2   13.80    2.70
  -4  -1   2   18.30    1.50
  -4  -1   2   17.00    2.00
  -4  -1   2    9.70    3.00
  -4  -1   2   15.30    0.70
   3   1  -2  199.18    6.60
   3   1  -2  186.28    4.60
  -3  -1   2  184.38    4.60
  -3  -1   2  188.58    3.90
  -3  -1   2  188.58    5.60
   2   1  -2    0.00    0.50
   2   1  -2    1.50    1.30
  -2  -1   2    0.20    0.40
  -2  -1   2    0.60    0.40
  -2  -1   2   -0.30    1.00
  -2  -1   2    0.70    0.80
   1   1  -2    7.20    0.60
   1   1  -2    8.20    1.10
   1   1  -2    9.90    1.10
   1   1  -2    7.30    0.90
   1   1  -2    7.60    0.50
   1   1  -2   10.30    1.10
   1   1  -2    6.60    0.70
  -1  -1   2    7.90    0.70
  -1  -1   2    8.20    0.90
  -1  -1   2    7.40    0.70
  -1  -1   2    7.60    0.40
  -1  -1   2    6.90    1.00
  -1  -1   2    7.70    0.80
  -1  -1   2    7.90    0.80
   0   1  -2  402.56    8.50
   0   1  -2  373.86    8.60
   0   1  -2  424.46    9.20
   0   1  -2  432.46    7.80
   0   1  -2  396.36    8.40
   0   1  -2  455.15    8.30
   0  -1   2  442.56    8.00
   0  -1   2  458.65    8.30
   0  -1   2  437.36    8.60
   0  -1   2  450.85    8.80
   0  -1   2  431.46    8.60
   0  -1   2  447.36    9.20
   0  -1   2  426.56    8.90
   0  -1   2  443.56    8.50
   0  -1   2  416.96    7.70
  -1   1  -2  260.67    5.50
  -1   1  -2  265.47    5.50
  -1   1  -2  269.67    5.90
  -1   1  -2  275.87    5.80
   1  -1   2  258.17    5.40
   1  -1   2  275.07    5.50
  -2   1  -2 3875.31   72.29
   2  -1   2 3841.62   71.79
  -3   1  -2   17.80    1.60
  -3   1  -2   17.20    1.10
  -3   1  -2   17.90    3.20
  -3   1  -2   18.60    1.50
   3  -1   2   18.50    2.00
   3  -1   2   14.70    2.50
   3  -1   2   19.30    1.70
  -4   1  -2  222.98   10.00
  -4   1  -2  239.38    5.20
  -4   1  -2  239.78    6.90
  -4   1  -2  236.08    6.40
   4  -1   2  240.18    9.70
   4  -1   2  242.28    7.20
   4  -1   2  240.18    6.40
  -5   1  -2   39.70    2.80
  -5   1  -2   36.30    2.40
  -5   1  -2   40.20    5.00
  -5   1  -2   33.50    1.50
   5  -1   2   33.70    2.30
   5  -1   2   33.60    2.80
  -6   1  -2    1.70    1.10
  -6   1  -2    2.60    2.40
  -6   1  -2    1.10    0.90
   6  -1   2    2.20    1.20
   6  -1   2   -1.80    1.50
   6  -1   2    1.00    0.80
  -7   1  -2   38.70    3.40
  -7   1  -2   21.30    4.80
  -7   1  -2   28.30    2.60
   7  -1   2   25.70    3.00
   7  -1   2   26.00    2.50
   7  -1   2   27.80    4.80
  -8   1  -2    2.40    1.30
  -8   1  -2    0.10    1.30
  -8   1  -2    0.90    2.60
   8  -1   2    0.10    1.00
   8  -1   2    1.70    2.30
   8  -1   2    1.90    1.60
  -9   1  -2  393.06   12.00
  -9   1  -2  399.76   12.90
  -9   1  -2  391.86   19.00
   9  -1   2  389.46   11.60
   9  -1   2  367.16   16.60
   9  -1   2  391.96   13.30
 -10   1  -2   14.80    2.90
 -10   1  -2   15.20    2.80
 -10   1  -2   17.40    5.40
  10  -1   2   11.80    4.00
  10  -1   2   14.30    3.80
  10  -1   2   12.20    3.00
 -11   1  -2   42.20    7.90
 -11   1  -2   50.59    4.90
 -11   1  -2   49.99    4.50
  11  -1   2   52.49    8.00
  11  -1   2   51.59    4.40
  11  -1   2   56.39    5.70
 -12   1  -2   -0.30    1.50
 -12   1  -2    0.00    1.60
 -12   1  -2   -4.90    3.60
  12  -1   2   -2.40    1.30
  12  -1   2    0.90    3.20
  12  -1   2   -0.20    2.20
 -13   1  -2   17.80    5.70
 -13   1  -2   20.90    4.20
 -13   1  -2   23.70    3.10
 -13   1  -2   28.40    5.60
  13  -1   2   23.00    4.50
  13  -1   2   21.30    3.60
  13  -1   2   21.10    6.10
 -14   1  -2   -1.40    2.50
 -14   1  -2    1.60    1.70
 -14   1  -2   -0.10    4.50
 -14   1  -2    1.30    1.80
  14  -1   2   -3.70    4.50
  14  -1   2    0.90    1.80
  15   0  -2   -2.00    1.80
  15   0  -2    7.20    4.70
 -15   0   2    0.60    3.90
 -15   0   2   -5.10    2.10
  14   0  -2    7.10    4.30
  14   0  -2    5.70    4.90
  14   0  -2   15.60    3.10
 -14   0   2   12.10    5.70
 -14   0   2    9.30    3.00
 -14   0   2    5.60    2.90
  13   0  -2    2.80    2.50
  13   0  -2   -0.90    2.70
  13   0  -2    0.40    1.40
 -13   0   2   -1.10    1.80
 -13   0   2   -1.10    1.60
 -13   0   2    6.20    4.00
  12   0  -2   11.10    3.10
  12   0  -2   11.90    2.60
  12   0  -2   20.20    4.90
 -12   0   2   17.10    3.70
 -12   0   2    4.70    3.90
 -12   0   2   16.90    3.10
  11   0  -2   40.10    3.70
  11   0  -2   36.80    4.40
  11   0  -2   41.00    6.70
 -11   0   2   37.50    4.50
 -11   0   2   36.90   11.60
 -11   0   2   35.50    3.80
  10   0  -2  308.27    9.70
  10   0  -2  284.77   11.50
  10   0  -2  285.17   14.10
 -10   0   2  291.77   16.60
 -10   0   2  298.87   10.10
 -10   0   2  273.87   11.50
   9   0  -2    1.20    1.10
   9   0  -2    5.40    2.10
   9   0  -2    2.60    2.40
  -9   0   2    4.00    3.10
  -9   0   2    8.00    2.30
  -9   0   2    2.90    1.50
   8   0  -2  226.88    7.30
   8   0  -2  226.38    8.90
   8   0  -2  217.48   11.00
  -8   0   2  231.58    7.70
  -8   0   2  218.58    8.80
  -8   0   2  232.18   13.00
   7   0  -2   68.39    3.50
   7   0  -2   64.69    5.80
   7   0  -2   63.99    4.30
  -7   0   2   68.79    4.40
  -7   0   2   64.29    3.60
  -7   0   2   69.29    6.80
   6   0  -2   20.50    1.90
   6   0  -2   17.70    3.30
   6   0  -2   18.10    2.40
  -6   0   2   23.90    3.10
  -6   0   2   21.90    2.10
  -6   0   2   23.10    4.50
   5   0  -2  441.76   13.60
   5   0  -2  458.95   10.20
   5   0  -2  435.06   11.50
  -5   0   2  434.36   14.70
  -5   0   2  430.26   11.50
  -5   0   2  448.06   10.30
   4   0  -2  583.64   11.90
   4   0  -2  567.74   13.10
   4   0  -2  574.74   14.80
  -4   0   2  576.84   12.10
  -4   0   2  545.45   13.30
   3   0  -2    3.30    0.70
   3   0  -2    3.90    1.40
  -3   0   2    4.60    1.70
  -3   0   2    5.60    0.90
   2   0  -2  328.37    6.20
   2   0  -2  320.47    7.60
   2   0  -2  320.37    7.50
  -2   0   2  313.87    6.60
  -2   0   2  319.87    7.90
  -2   0   2  326.37    7.50
   1   0  -2   90.49    2.60
   1   0  -2   91.79    2.30
   1   0  -2   96.19    2.20
   1   0  -2   93.09    2.50
   1   0  -2   88.79    3.20
  -1   0   2   93.99    2.60
  -1   0   2   87.99    2.30
  -1   0   2   94.89    2.50
  -1   0   2   90.59    2.30
  -1   0   2   92.59    3.20
  -1   0   2   76.29    2.60
   0   0  -2 1184.48   22.20
   0   0   2 1220.88   22.30
   1   0   2 4015.20   73.49
  -2   0  -2    6.10    1.80
  -2   0  -2    6.20    0.90
  -2   0  -2    4.80    0.80
   2   0   2    5.60    1.00
   2   0   2    6.00    0.70
   2   0   2    5.90    2.00
   2   0   2    5.80    0.80
  -3   0  -2    0.50    0.80
  -3   0  -2    1.00    0.70
  -3   0  -2    0.00    1.50
   3   0   2    0.00    0.80
   3   0   2    0.70    1.90
   3   0   2    0.40    0.40
  -4   0  -2   20.00    3.70
  -4   0  -2   19.60    1.70
  -4   0  -2   20.00    2.10
   4   0   2   17.80    1.00
   4   0   2   18.80    2.10
   4   0   2   18.40    1.70
   4   0   2   18.60    3.50
  -5   0  -2   64.49    6.00
  -5   0  -2   65.19    3.80
  -5   0  -2   57.29    3.00
   5   0   2   65.29    6.10
   5   0   2   59.39    3.10
   5   0   2   64.39    3.90
  -6   0  -2    2.90    1.00
  -6   0  -2    2.20    1.40
  -6   0  -2   -0.30    2.00
   6   0   2    2.30    1.10
   6   0   2    1.30    2.00
   6   0   2    2.90    1.60
  -7   0  -2   37.20    2.90
  -7   0  -2   28.60    5.40
  -7   0  -2   34.50    3.30
   7   0   2   32.40    5.50
   7   0   2   33.20    2.80
   7   0   2   42.00    3.90
  -8   0  -2   13.50    2.20
  -8   0  -2    9.60    2.40
  -8   0  -2   19.90    4.80
   8   0   2   10.10    3.60
   8   0   2    7.80    2.30
   8   0   2   10.90    2.00
  -9   0  -2    2.00    1.70
  -9   0  -2    0.60    2.60
  -9   0  -2    1.70    1.90
   9   0   2    2.80    3.00
   9   0   2    2.70    1.70
   9   0   2    3.80    1.50
 -10   0  -2    6.40    2.20
 -10   0  -2   11.80    2.60
 -10   0  -2    8.10    4.10
  10   0   2    9.90    2.30
  10   0   2    6.90    2.50
  10   0   2    2.60    3.10
 -11   0  -2   -0.30    1.60
 -11   0  -2    1.50    3.10
 -11   0  -2    4.40    1.90
 -11   0  -2    3.40    2.10
  11   0   2    0.60    1.30
  11   0   2    3.20    2.30
 -12   0  -2   40.70    8.10
 -12   0  -2   27.30    4.30
 -12   0  -2   28.60    4.00
 -12   0  -2   26.70    2.90
  12   0   2   23.30    3.70
  12   0   2   32.60   10.30
 -13   0  -2    7.00    4.60
 -13   0  -2   10.20    3.30
 -13   0  -2    6.70    2.00
 -13   0  -2   10.20    3.70
  13   0   2   -1.40    3.90
  13   0   2    8.50    2.90
  13   0   2    8.20    3.60
 -14   0  -2    5.80    4.50
 -14   0  -2    1.10    1.80
  14   0   2    1.50    2.10
  14   0   2    9.40    4.90
  15  -1  -2    7.50    2.60
  15  -1  -2    4.80    3.80
 -15   1   2    7.00    9.60
 -15   1   2    8.00    3.30
 -15   1   2   17.30    6.50
  14  -1  -2    2.90    3.70
  14  -1  -2    5.50    3.10
  14  -1  -2    8.30    2.40
 -14   1   2    9.80    3.50
 -14   1   2    6.20    5.10
 -14   1   2    7.40    2.90
  13  -1  -2   -1.40    1.20
  13  -1  -2   -2.80    2.40
  13  -1  -2    1.70    2.20
 -13   1   2    0.20    2.10
 -13   1   2    0.80    4.00
 -13   1   2    2.90    1.90
  12  -1  -2   -0.40    2.40
  12  -1  -2    1.80    1.80
  12  -1  -2   -1.20    1.00
 -12   1   2    2.50    1.80
 -12   1   2    0.00    3.30
 -12   1   2    3.10    1.90
  11  -1  -2    3.90    1.60
  11  -1  -2    2.20    2.70
  11  -1  -2    4.20    2.10
 -11   1   2    7.80    2.60
 -11   1   2    4.90    2.00
 -11   1   2    0.80    3.20
  10  -1  -2   51.99    3.70
  10  -1  -2   47.30    4.50
  10  -1  -2   52.49    6.10
 -10   1   2   40.60    7.40
 -10   1   2   48.50    4.60
 -10   1   2   47.90    4.10
   9  -1  -2  208.38    7.30
   9  -1  -2  207.58   10.80
   9  -1  -2  217.58    9.00
  -9   1   2  218.28   13.30
  -9   1   2  191.18    8.60
  -9   1   2  215.58    8.00
   8  -1  -2  587.44   18.90
   8  -1  -2  612.44   16.50
   8  -1  -2  627.54   14.60
  -8   1   2  609.04   15.20
  -8   1   2  617.64   22.20
  -8   1   2  607.24   16.40
   7  -1  -2  273.57    9.30
   7  -1  -2  286.37    8.00
   7  -1  -2  274.47   11.10
  -7   1   2  275.57    9.40
  -7   1   2  284.17    8.40
  -7   1   2  279.17   13.10
   6  -1  -2   35.40    3.90
   6  -1  -2   36.20    3.00
   6  -1  -2   37.10    2.40
  -6   1   2   38.10    3.10
  -6   1   2   38.80    5.40
  -6   1   2   39.10    2.70
   5  -1  -2  226.08    6.20
   5  -1  -2  216.38    7.10
   5  -1  -2  220.88    8.40
  -5   1   2  233.78    6.60
  -5   1   2  240.78    9.80
  -5   1   2  226.88    7.20
   4  -1  -2  101.89    4.20
   4  -1  -2  109.49    5.00
   4  -1  -2  110.49    3.70
  -4   1   2  111.29    3.90
  -4   1   2  114.09    5.70
  -3   1   2 4124.79   75.69
   2  -1  -2  246.48    6.20
   2  -1  -2  225.38    5.50
   2  -1  -2  236.78    5.90
   2  -1  -2  241.48    4.80
  -2   1   2  236.68    6.40
  -2   1   2  244.18    6.20
  -2   1   2  242.88    6.10
  -2   1   2  238.58    5.80
   1  -1  -2  864.81   16.50
   1  -1  -2  854.91   16.60
   1  -1  -2  859.31   17.30
  -1   1   2  865.21   16.50
  -1   1   2  884.01   15.70
  -1   1   2  857.01   17.20
  -1   1   2  854.01   16.60
  -1   1   2  858.01   16.60
   0  -1  -2   73.89    2.60
   0  -1  -2   77.39    2.50
   0  -1  -2   77.69    2.60
   0   1   2   75.09    2.60
   0   1   2   76.49    2.60
   0   1   2   77.19    2.60
   0   1   2   80.29    3.00
  -1  -1  -2   19.20    1.30
  -1  -1  -2   20.00    1.40
  -1  -1  -2   17.30    2.10
  -1  -1  -2   18.00    1.20
   1   1   2   18.80    1.20
   1   1   2   21.00    1.40
   1   1   2   20.00    1.40
   1   1   2   23.00    2.50
  -2  -1  -2  769.92   15.30
  -2  -1  -2  762.72   15.60
  -2  -1  -2  789.82   18.40
  -2  -1  -2  789.72   15.00
   2   1   2  763.52   16.20
   2   1   2  787.02   19.00
   2   1   2  760.32   15.50
  -3  -1  -2  739.33   14.40
  -3  -1  -2  735.43   18.90
  -3  -1  -2  720.93   14.90
  -3  -1  -2  730.23   15.90
   3   1   2  722.73   16.10
   3   1   2  730.23   15.10
   3   1   2  711.53   19.80
  -4  -1  -2  238.48    6.70
  -4  -1  -2  246.48   10.40
  -4  -1  -2  259.07    7.80
  -4  -1  -2  253.97    6.20
   4   1   2  251.87   11.20
   4   1   2  250.27    7.90
   4   1   2  252.57    5.30
   4   1   2  246.98    7.00
  -5  -1  -2    8.80    1.90
  -5  -1  -2    8.20    1.20
  -5  -1  -2    6.00    1.30
   5   1   2    7.30    1.70
   5   1   2    7.00    1.40
   5   1   2    4.70    2.60
   5   1   2    7.50    0.70
  -6  -1  -2    0.20    0.60
  -6  -1  -2   -1.00    0.60
  -6  -1  -2    0.40    1.80
  -6  -1  -2   -0.50    0.90
   6   1   2   -0.20    0.80
   6   1   2   -0.30    0.80
   6   1   2   -0.90    2.00
  -7  -1  -2    4.20    1.10
  -7  -1  -2    3.70    2.80
  -7  -1  -2    4.60    1.50
  -7  -1  -2    4.80    1.70
   7   1   2    4.50    1.80
   7   1   2    2.50    3.10
   7   1   2    4.80    1.50
  -8  -1  -2    4.00    1.80
  -8  -1  -2    2.70    1.20
  -8  -1  -2    0.60    1.20
  -8  -1  -2    3.70    2.90
   8   1   2    4.00    1.50
   8   1   2    1.90    2.00
   8   1   2    3.30    3.10
  -9  -1  -2   18.80    3.40
  -9  -1  -2   16.60    4.70
  -9  -1  -2   29.30    2.60
  -9  -1  -2   21.30    3.90
   9   1   2   22.40    5.30
   9   1   2   20.90    3.90
   9   1   2   27.10    3.10
 -10  -1  -2  104.89    6.80
 -10  -1  -2  133.39   11.20
 -10  -1  -2  111.69    5.00
  10   1   2  118.29   10.70
  10   1   2  103.69    6.00
  10   1   2  103.89    7.20
 -11  -1  -2    6.20    2.70
 -11  -1  -2    2.30    3.20
 -11  -1  -2    8.30    1.90
 -11  -1  -2    5.30    2.20
  11   1   2    5.20    3.80
  11   1   2    3.20    2.40
  11   1   2    3.60    1.80
 -12  -1  -2    5.50    2.30
 -12  -1  -2   11.50    5.20
 -12  -1  -2    3.40    1.60
 -12  -1  -2    2.70    2.20
  12   1   2    1.90    4.50
  12   1   2    5.10    3.10
  12   1   2    5.30    2.40
 -13  -1  -2   -2.30    3.30
 -13  -1  -2    3.10    2.30
 -13  -1  -2    2.10    2.20
 -13  -1  -2    0.20    1.30
  13   1   2    0.30    1.90
  13   1   2    3.50    4.10
 -14  -1  -2    8.40    5.30
  14   1   2    8.00    9.70
  14   1   2    1.50    2.30
  15  -2  -2   17.60    3.30
  15  -2  -2   21.20    5.40
 -15   2   2   10.60    3.80
 -15   2   2   19.30    4.30
 -15   2   2   28.20    8.70
  14  -2  -2    4.70    2.00
  14  -2  -2    4.70    2.60
  14  -2  -2    0.60    2.70
 -14   2   2    0.50    5.00
 -14   2   2    3.10    2.20
 -14   2   2    2.60    2.50
  13  -2  -2    2.60    3.30
  13  -2  -2    5.50    2.60
  13  -2  -2    4.00    1.90
 -13   2   2   -1.60    3.20
 -13   2   2    5.90    2.50
 -13   2   2    4.60    2.60
  12  -2  -2   18.00    3.00
  12  -2  -2   21.30    4.90
  12  -2  -2   14.50    3.30
 -12   2   2   10.70    4.80
 -12   2   2   18.60    3.40
 -12   2   2   20.10    3.50
  11  -2  -2    3.30    1.60
  11  -2  -2    3.70    2.90
  11  -2  -2    3.70    2.10
 -11   2   2    3.60    1.90
 -11   2   2    5.50    4.40
 -11   2   2    1.70    1.70
  10  -2  -2   -1.90    1.60
  10  -2  -2   -0.10    1.10
  10  -2  -2    0.30    1.10
 -10   2   2   -0.70    1.20
 -10   2   2    2.50    3.20
 -10   2   2    1.00    1.60
   9  -2  -2   31.90    3.60
   9  -2  -2   42.00    5.00
   9  -2  -2   36.90    3.10
  -9   2   2   38.60    3.50
  -9   2   2   29.70    3.50
  -9   2   2   38.30    6.40
   8  -2  -2  446.26   11.50
   8  -2  -2  412.56   12.80
   8  -2  -2  424.76   14.70
  -8   2   2  439.86   12.20
  -8   2   2  425.86   17.70
  -8   2   2  442.66   13.10
   7  -2  -2   45.50    2.90
   7  -2  -2   40.60    3.30
   7  -2  -2   44.50    4.30
  -7   2   2   43.20    3.10
  -7   2   2   35.60    5.10
  -7   2   2   43.20    3.50
   6  -2  -2  145.29    5.90
   6  -2  -2  130.69    6.60
   6  -2  -2  143.09    5.10
  -6   2   2  138.89    5.40
  -6   2   2  155.88    8.30
  -6   2   2  142.29    5.80
   5  -2  -2   -0.80    0.70
   5  -2  -2    0.60    1.10
   5  -2  -2    0.10    0.70
  -5   2   2    0.30    0.90
  -5   2   2    1.40    1.00
  -5   2   2   -0.70    1.30
   4  -2  -2   20.90    1.80
   4  -2  -2   20.80    2.40
   4  -2  -2   23.80    2.20
  -4   2   2   22.80    2.00
  -4   2   2   23.90    2.90
   3  -2  -2  436.36    9.80
  -3   2   2  428.16   10.00
  -3   2   2  435.46   10.30
  -3   2   2  439.76   10.70
   2  -2  -2    5.30    1.10
   2  -2  -2    6.00    1.10
   2  -2  -2    5.20    1.10
  -2   2   2    4.50    1.10
  -2   2   2    7.40    1.20
  -2   2   2    3.90    1.00
   1  -2  -2  823.62   16.60
   1  -2  -2  830.12   16.80
   1  -2  -2  813.42   16.10
   1  -2  -2  840.22   16.80
  -1   2   2  828.92   16.10
  -1   2   2  815.52   16.80
  -1   2   2  810.32   16.50
  -1   2   2  825.82   16.10
   0  -2  -2   11.90    1.40
   0  -2  -2   11.80    1.20
   0  -2  -2   15.20    1.90
   0  -2  -2   12.50    1.30
   0   2   2   12.90    1.90
   0   2   2   11.60    1.20
   0   2   2   13.00    1.40
  -1  -2  -2   28.20    1.70
  -1  -2  -2   28.40    2.50
   1   2   2   26.90    1.60
   1   2   2   24.00    1.40
   1   2   2   26.80    1.90
   1   2   2   27.00    2.60
  -2  -2  -2    4.40    1.00
  -2  -2  -2    3.10    1.50
  -2  -2  -2    2.60    0.70
  -2  -2  -2    4.60    1.00
   2   2   2    2.80    1.00
   2   2   2    2.40    0.90
   2   2   2    3.30    1.70
   2   2   2    4.30    0.70
  -3  -2  -2   35.00    2.20
  -3  -2  -2   36.70    1.80
  -3  -2  -2   33.90    3.70
   3   2   2   36.50    4.40
   3   2   2   36.10    2.30
   3   2   2   42.10    2.90
  -4  -2  -2  144.99    4.20
  -4  -2  -2  156.18    8.10
  -4  -2  -2  143.59    5.80
  -4  -2  -2  148.89    5.00
   4   2   2  164.68    9.20
   4   2   2  146.99    5.30
   4   2   2  144.29    6.00
  -5  -2  -2    4.00    2.20
  -5  -2  -2    4.10    1.10
  -5  -2  -2    4.90    1.60
  -5  -2  -2    5.80    1.10
   5   2   2    6.30    1.60
   5   2   2    4.60    0.60
   5   2   2    3.40    1.20
   5   2   2    5.60    2.90
  -6  -2  -2  331.67    8.10
  -6  -2  -2  337.77   10.70
  -6  -2  -2  350.46   14.50
  -6  -2  -2  324.37    9.20
   6   2   2  343.17   15.80
   6   2   2  328.97    9.70
   6   2   2  303.57   10.80
  -7  -2  -2    1.70    2.40
  -7  -2  -2    2.50    1.30
  -7  -2  -2    3.90    1.70
  -7  -2  -2    4.20    1.10
   7   2   2    1.80    1.20
   7   2   2    1.10    1.20
   7   2   2   -0.20    2.60
  -8  -2  -2  101.39    5.20
  -8  -2  -2  100.29    7.90
  -8  -2  -2   93.89    8.60
  -8  -2  -2  100.09    4.20
   8   2   2   85.89    9.20
   8   2   2   90.89    6.20
   8   2   2   91.99    5.20
  -9  -2  -2   -0.80    1.10
  -9  -2  -2    0.40    0.90
  -9  -2  -2    0.90    1.40
  -9  -2  -2   -1.80    2.10
   9   2   2    0.60    1.60
   9   2   2    1.70    2.90
   9   2   2   -0.40    1.20
 -10  -2  -2   23.70    4.00
 -10  -2  -2   29.10    3.40
 -10  -2  -2   17.10    5.10
 -10  -2  -2   29.00    2.60
  10   2   2   30.10    3.70
  10   2   2   28.60    4.70
  10   2   2   19.00    5.60
 -11  -2  -2    1.80    2.00
 -11  -2  -2   -0.70    3.10
 -11  -2  -2    1.20    1.20
 -11  -2  -2   -3.00    1.30
  11   2   2   -1.60    3.70
  11   2   2    0.60    1.60
  11   2   2   -0.10    2.30
 -12  -2  -2    0.40    1.60
 -12  -2  -2    1.50    1.60
 -12  -2  -2   -0.90    2.90
  12   2   2    1.60    4.00
  12   2   2   -0.70    2.20
  12   2   2   -2.00    1.60
 -13  -2  -2    2.70    1.60
 -13  -2  -2    5.30    2.20
 -13  -2  -2    1.40    4.30
  13   2   2    5.00    4.90
  13   2   2    1.70    2.10
 -14  -2  -2   21.50    2.90
 -14  -2  -2   15.10    6.70
  16  -3  -2   -0.50    1.40
  16  -3  -2   -0.30    2.00
 -16   3   2    3.80    6.20
 -16   3   2   -0.90    2.60
  15  -3  -2    3.30    1.50
  15  -3  -2    8.30    4.20
  15  -3  -2    6.70    2.50
 -15   3   2    5.90    2.90
 -15   3   2   -0.30    5.10
 -15   3   2    4.60    2.80
  14  -3  -2   25.40    5.00
  14  -3  -2   33.00    6.30
  14  -3  -2   35.80    3.90
 -14   3   2   19.40    7.50
 -14   3   2   36.40    5.40
 -14   3   2   22.70    4.50
  13  -3  -2   -0.30    1.40
  13  -3  -2   -0.90    1.80
  13  -3  -2    2.70    2.60
 -13   3   2   -4.50    1.60
 -13   3   2    2.10    3.40
 -13   3   2    0.40    1.80
  12  -3  -2   22.70    4.10
  12  -3  -2   21.20    4.70
  12  -3  -2   21.60    3.20
 -12   3   2   16.70    3.30
 -12   3   2   23.90    6.50
 -12   3   2   16.40    3.90
  11  -3  -2   17.20    4.10
  11  -3  -2   12.30    3.10
  11  -3  -2   14.30    2.50
 -11   3   2   15.30    5.20
 -11   3   2   18.50    3.40
 -11   3   2   16.40    3.50
  10  -3  -2   68.79    4.40
  10  -3  -2   66.59    5.20
  10  -3  -2   70.09    6.50
 -10   3   2   63.89    5.00
 -10   3   2   76.89    8.90
 -10   3   2   59.39    4.70
   9  -3  -2   21.70    2.60
   9  -3  -2   21.60    4.00
   9  -3  -2   16.50    2.80
  -9   3   2   26.60    3.10
  -9   3   2   28.40    4.00
  -9   3   2   25.00    5.30
   8  -3  -2    0.00    1.10
   8  -3  -2    1.60    1.10
   8  -3  -2    1.70    1.50
  -8   3   2    1.20    1.40
  -8   3   2   -1.10    1.90
  -8   3   2    0.40    1.10
   7  -3  -2   22.50    2.20
   7  -3  -2   21.40    2.60
   7  -3  -2   22.10    1.20
   7  -3  -2   22.60    3.40
  -7   3   2   24.80    4.40
  -7   3   2   23.10    2.60
  -7   3   2   27.50    2.70
   6  -3  -2  138.89    6.50
   6  -3  -2  133.19    5.70
  -6   3   2  152.98    6.00
  -6   3   2  136.19    5.60
  -6   3   2  143.39    7.70
   5  -3  -2  236.28    8.20
   5  -3  -2  236.98    7.50
   5  -3  -2  242.68    7.10
  -5   3   2  243.18    9.10
  -5   3   2  231.78    7.40
   4  -3  -2  175.78    6.30
   4  -3  -2  167.68    5.80
   4  -3  -2  173.18    5.60
  -4   3   2  179.78    6.00
  -4   3   2  178.98    6.70
  -4   3   2  178.18    5.90
   3  -3  -2   37.00    2.60
   3  -3  -2   34.70    2.40
  -3   3   2   35.40    2.70
  -3   3   2   35.90    2.60
  -3   3   2   38.70    2.30
  -3   3   2   35.70    2.40
   2  -3  -2  244.08    6.60
   2  -3  -2  240.88    6.80
  -2   3   2  238.98    6.90
  -2   3   2  234.98    6.00
  -2   3   2  236.88    6.90
  -2   3   2  239.88    6.30
   1  -3  -2   13.90    1.40
   1  -3  -2   12.20    1.90
   1  -3  -2    9.50    1.50
  -1   3   2   12.40    1.30
  -1   3   2   11.50    1.20
  -1   3   2   10.40    1.40
  -1   3   2   11.80    1.80
   0  -3  -2  208.78    5.60
   0  -3  -2  216.88    5.60
   0  -3  -2  214.98    6.80
   0  -3  -2  218.08    6.30
   0   3   2  219.58    7.00
   0   3   2  223.08    6.40
   0   3   2  221.08    5.40
  -1  -3  -2    5.80    1.50
  -1  -3  -2    7.20    1.20
   1   3   2    5.30    0.80
   1   3   2    4.90    1.60
   1   3   2    4.40    1.20
  -2  -3  -2    8.80    1.20
  -2  -3  -2   10.70    1.50
  -2  -3  -2   13.50    2.40
   2   3   2   11.50    1.70
   2   3   2   13.00    1.10
   2   3   2   13.80    2.80
   2   3   2   12.20    1.70
  -3  -3  -2   38.90    2.40
  -3  -3  -2   43.70    3.90
  -3  -3  -2   42.40    2.00
  -3  -3  -2   39.30    2.50
   3   3   2   39.30    3.00
   3   3   2   44.50    4.70
  -4  -3  -2    3.10    2.10
  -4  -3  -2    1.50    0.70
  -4  -3  -2    1.50    0.90
   4   3   2    6.30    2.80
   4   3   2    3.90    1.30
   4   3   2    4.80    1.60
  -5  -3  -2   40.90    2.90
  -5  -3  -2   42.10    4.80
   5   3   2   42.40    3.60
   5   3   2   44.00    3.20
   5   3   2   35.90    5.80
  -6  -3  -2    4.90    1.10
  -6  -3  -2    3.20    2.30
  -6  -3  -2    2.60    1.30
  -6  -3  -2    2.40    1.50
   6   3   2    5.80    2.10
   6   3   2    6.60    3.50
   6   3   2    5.20    1.50
  -7  -3  -2   31.30    3.50
  -7  -3  -2   33.40    3.00
  -7  -3  -2   35.20    2.30
  -7  -3  -2   30.20    5.40
   7   3   2   33.30    3.90
   7   3   2   32.50    3.20
   7   3   2   27.80    6.20
  -8  -3  -2   29.90    2.40
  -8  -3  -2   29.50    5.60
  -8  -3  -2   36.40    4.00
  -8  -3  -2   32.90    3.20
   8   3   2   34.60    3.50
   8   3   2   39.60    7.40
   8   3   2   32.30    4.60
  -9  -3  -2  264.27   11.10
  -9  -3  -2  267.27    7.80
  -9  -3  -2  266.27   14.90
  -9  -3  -2  289.87    9.90
   9   3   2  268.27   11.80
   9   3   2  280.37   17.00
   9   3   2  284.57   11.80
 -10  -3  -2   20.80    2.40
 -10  -3  -2   24.40    5.80
 -10  -3  -2   23.30    3.40
  10   3   2   17.50    6.00
  10   3   2   18.60    3.90
  10   3   2   24.60    3.60
 -11  -3  -2    2.50    3.10
 -11  -3  -2    0.60    1.70
 -11  -3  -2    5.20    1.50
  11   3   2   -0.20    3.70
  11   3   2    2.80    1.90
  11   3   2    2.00    2.20
 -12  -3  -2    4.40    2.30
 -12  -3  -2    6.60    4.00
 -12  -3  -2    5.30    1.60
  12   3   2   -1.50    4.40
  12   3   2    5.20    2.60
 -13  -3  -2   11.70    5.40
 -13  -3  -2   11.10    3.30
 -13  -3  -2   13.40    3.30
  13   3   2    9.20    3.00
  13   3   2   22.10    7.20
  16  -4  -2    6.00    4.10
 -16   4   2    2.80    3.10
 -16   4   2   11.60    6.70
  15  -4  -2    2.10    1.70
  15  -4  -2    7.00    3.50
  15  -4  -2   -1.50    1.00
 -15   4   2    1.90    2.60
 -15   4   2    1.00    2.40
 -15   4   2    2.00    5.50
  14  -4  -2   -3.00    2.00
  14  -4  -2    0.10    1.00
  14  -4  -2   -0.40    1.30
  14  -4  -2   -4.70    2.20
 -14   4   2    0.10    4.70
 -14   4   2    1.20    2.40
 -14   4   2    0.30    1.90
  13  -4  -2  106.99    4.00
  13  -4  -2  108.69    6.40
  13  -4  -2  105.59    8.70
  13  -4  -2  113.59    7.90
 -13   4   2  119.39   12.70
 -13   4   2   97.49    7.20
 -13   4   2   89.49   10.70
  12  -4  -2    7.70    2.70
  12  -4  -2    6.30    1.20
  12  -4  -2    3.90    1.90
  12  -4  -2    5.30    3.00
 -12   4   2    6.50    4.30
  11  -4  -2    0.60    0.80
  11  -4  -2    1.70    1.40
  11  -4  -2    2.20    2.50
  11  -4  -2    0.60    1.80
 -11   4   2    8.40    4.10
 -11   4   2    1.60    1.70
 -11   4   2    3.00    1.90
  10  -4  -2   28.90    3.10
  10  -4  -2   24.80    4.40
 -10   4   2   26.60    3.80
 -10   4   2   19.90    5.30
 -10   4   2   23.80    3.60
   9  -4  -2    8.70    2.90
   9  -4  -2    5.60    1.60
   9  -4  -2    7.20    1.00
   9  -4  -2    4.60    1.90
  -9   4   2    6.60    3.10
  -9   4   2    9.40    2.30
  -9   4   2    7.10    2.10
   8  -4  -2   53.79    2.00
   8  -4  -2   55.59    3.60
   8  -4  -2   55.99    4.20
   8  -4  -2   57.79    4.90
  -8   4   2   58.09    4.20
  -8   4   2   60.19    6.30
  -8   4   2   55.59    4.10
   7  -4  -2   63.09    4.70
   7  -4  -2   60.99    3.60
   7  -4  -2   67.09    4.20
  -7   4   2   72.89    4.30
  -7   4   2   57.19    5.50
  -7   4   2   64.29    4.20
   6  -4  -2   47.90    3.90
   6  -4  -2   51.79    3.30
   6  -4  -2   46.70    3.40
  -6   4   2   52.49    3.60
  -6   4   2   52.19    3.50
  -6   4   2   53.99    4.70
   5  -4  -2  133.59    6.00
   5  -4  -2  141.69    5.40
   5  -4  -2  137.39    5.50
  -5   4   2  143.09    5.30
  -5   4   2  150.88    5.70
  -5   4   2  135.99    5.70
  -5   4   2  140.39    6.60
   4  -4  -2    1.60    1.00
   4  -4  -2   -0.80    0.90
  -4   4   2    0.30    0.40
  -4   4   2    0.30    0.80
  -4   4   2   -0.40    1.00
  -4   4   2    0.40    0.90
  -4   4   2    0.50    1.10
   3  -4  -2   33.80    2.70
   3  -4  -2   33.40    2.30
   3  -4  -2   36.40    2.70
  -3   4   2   36.30    2.20
  -3   4   2   33.50    3.20
  -3   4   2   35.40    2.80
   2  -4  -2  124.29    4.90
   2  -4  -2  115.69    4.30
   2  -4  -2  117.69    4.80
  -2   4   2  119.29    3.80
  -2   4   2  121.89    4.90
  -2   4   2  122.89    5.00
   1  -4  -2  158.68    4.60
   1  -4  -2  160.68    5.80
   1  -4  -2  154.08    5.50
  -1   4   2  154.58    5.60
  -1   4   2  158.98    3.80
  -1   4   2  160.58    4.50
  -1   4   2  161.88    6.00
  -1   4   2  159.98    4.40
   0  -4  -2   86.59    4.30
   0  -4  -2   87.59    3.20
   0  -4  -2   89.39    3.40
   0  -4  -2   83.69    3.80
   0   4   2   88.69    3.00
   0   4   2   86.99    4.60
  -1  -4  -2   88.09    4.70
  -1  -4  -2   87.29    3.30
  -1  -4  -2   88.69    3.90
   1   4   2   82.69    4.00
   1   4   2   85.29    5.00
  -2  -4  -2   15.20    1.60
  -2  -4  -2   15.70    1.90
  -2  -4  -2   14.00    2.50
   2   4   2   17.70    3.20
   2   4   2   17.80    1.30
   2   4   2   18.70    2.20
   2   4   2   16.40    2.20
  -3  -4  -2    1.30    0.90
  -3  -4  -2    1.20    0.70
  -3  -4  -2   -1.70    1.00
   3   4   2    0.60    0.90
   3   4   2    0.30    1.70
   3   4   2    0.50    1.00
  -4  -4  -2    1.00    1.00
  -4  -4  -2   -0.20    0.60
  -4  -4  -2    1.70    1.70
   4   4   2    2.10    1.20
   4   4   2    2.50    1.30
   4   4   2   -0.20    1.90
  -5  -4  -2  248.88    7.90
  -5  -4  -2  251.97    6.30
  -5  -4  -2  254.27   11.40
   5   4   2  248.58    9.40
   5   4   2  253.47   13.20
   5   4   2  248.08    8.50
  -6  -4  -2   19.00    2.30
  -6  -4  -2   16.30    1.60
  -6  -4  -2   18.50    4.10
   6   4   2   15.80    2.50
   6   4   2   13.20    4.40
   6   4   2   11.50    4.10
  -7  -4  -2    3.30    1.60
  -7  -4  -2    3.90    2.40
  -7  -4  -2    5.60    1.20
   7   4   2    3.80    1.70
   7   4   2    1.80    3.00
   7   4   2    0.60    1.40
  -8  -4  -2   97.89    8.50
  -8  -4  -2   98.59    4.00
   8   4   2   97.79   10.60
   8   4   2   99.89    5.90
   8   4   2   96.89    6.80
  -9  -4  -2   70.19    3.50
  -9  -4  -2   60.89    7.20
  -9  -4  -2   78.49    5.90
   9   4   2   57.99    5.70
   9   4   2   63.49    5.10
   9   4   2   67.99    9.90
 -10  -4  -2   14.00    2.00
 -10  -4  -2   15.30    4.70
 -10  -4  -2   17.90    3.20
  10   4   2   15.30    5.90
  10   4   2   12.30    2.80
  10   4   2    8.00    3.40
 -11  -4  -2   12.60    2.80
 -11  -4  -2   12.30    1.80
 -11  -4  -2    7.60    4.20
  11   4   2   12.60    3.70
  11   4   2   11.60    3.00
  11   4   2    5.50    4.90
 -12  -4  -2    8.90    3.40
 -12  -4  -2    9.20    1.70
 -12  -4  -2    3.40    3.90
 -12  -4  -2    9.40    2.80
  12   4   2    5.80    2.80
  12   4   2    7.40    5.40
 -13  -4  -2    0.80    3.90
 -13  -4  -2    3.40    1.50
  13   4   2    7.40    3.00
  13   4   2   14.50    6.50
 -16   5   2    2.80    5.90
  15  -5  -2   41.40    6.80
  15  -5  -2   25.80    4.00
  15  -5  -2   32.70    6.30
 -15   5   2   33.80    5.40
 -15   5   2   23.70    8.30
 -15   5   2   41.00    6.20
  14  -5  -2    5.00    3.20
  14  -5  -2    7.20    2.40
  14  -5  -2    7.10    3.80
 -14   5   2    4.40    2.50
 -14   5   2   27.60    7.10
 -14   5   2    7.80    1.20
 -14   5   2   13.30    3.60
  13  -5  -2   22.20    3.50
  13  -5  -2   22.20    4.40
  13  -5  -2   20.20    4.90
 -13   5   2   18.40    3.60
 -13   5   2   21.60    4.10
 -13   5   2   16.40    6.40
  12  -5  -2   35.30    5.60
  12  -5  -2   40.40    4.00
  12  -5  -2   40.40    5.30
 -12   5   2   41.30    8.00
 -12   5   2   41.00    4.70
 -12   5   2   32.60    4.40
  11  -5  -2   37.20    3.60
  11  -5  -2   44.60    5.40
 -11   5   2   41.60    4.60
 -11   5   2   40.20    4.40
 -11   5   2   31.40    6.80
  10  -5  -2   98.69    7.20
  10  -5  -2   99.19    7.50
  10  -5  -2   99.79    5.40
 -10   5   2   83.59    8.70
 -10   5   2   95.59    6.10
 -10   5   2   99.39    6.20
   9  -5  -2  391.56   14.20
   9  -5  -2  387.56   12.60
   9  -5  -2  399.36   11.60
  -9   5   2  409.16   13.00
  -9   5   2  403.96   17.20
  -9   5   2  391.86   12.60
   8  -5  -2  175.38    7.60
   8  -5  -2  185.18    8.70
   8  -5  -2  193.28    7.20
  -8   5   2  207.88    8.40
  -8   5   2  200.68   10.70
  -8   5   2  192.48    7.80
   7  -5  -2  177.58    6.70
   7  -5  -2  176.68    7.10
   7  -5  -2  176.48    7.90
  -7   5   2  167.28    6.90
  -7   5   2  175.88    7.40
  -7   5   2  181.28    9.20
   6  -5  -2  187.48    6.80
   6  -5  -2  192.78    7.90
  -6   5   2  183.78    8.50
  -6   5   2  185.78    7.40
  -6   5   2  200.38    7.10
  -6   5   2  192.68    6.50
   5  -5  -2    6.50    1.60
   5  -5  -2    3.70    1.50
  -5   5   2    4.90    1.70
  -5   5   2    4.60    0.70
  -5   5   2    9.70    1.80
  -5   5   2    5.30    1.30
  -5   5   2    4.60    1.50
   4  -5  -2  445.26   12.50
   4  -5  -2  457.15   12.10
  -4   5   2  465.45   10.70
  -4   5   2  455.35   12.60
  -4   5   2  451.35   11.70
  -4   5   2  480.35   13.00
   3  -5  -2   -0.80    1.50
   3  -5  -2    0.20    0.50
   3  -5  -2    1.40    1.20
   3  -5  -2    1.10    0.90
  -3   5   2    2.00    1.10
  -3   5   2    0.70    1.20
  -3   5   2    1.50    0.80
   2  -5  -2  192.58    7.00
   2  -5  -2  199.98    7.10
   2  -5  -2  198.78    6.20
  -2   5   2  204.28    7.10
  -2   5   2  202.78    8.70
  -2   5   2  191.38    5.60
  -2   5   2  210.68    5.40
   1  -5  -2  484.55   12.70
   1  -5  -2  460.95   12.50
   1  -5  -2  464.85   10.50
  -1   5   2  486.65   12.50
  -1   5   2  478.75   10.30
  -1   5   2  460.35   14.50
  -1   5   2  472.75    9.90
   0  -5  -2  246.48    8.50
   0  -5  -2  248.88    6.50
   0  -5  -2  243.58    8.50
   0  -5  -2  252.57    6.70
   0   5   2  251.07    8.00
   0   5   2  255.67    8.90
  -1  -5  -2   17.30    1.80
  -1  -5  -2   15.30    2.80
  -1  -5  -2   21.50    2.20
   1   5   2   17.50    2.90
   1   5   2   21.90    2.40
  -2  -5  -2   76.19    3.40
  -2  -5  -2   70.89    3.70
  -2  -5  -2   76.39    5.10
   2   5   2   78.29    4.30
   2   5   2   74.09    4.20
   2   5   2   84.19    5.90
   2   5   2   74.19    2.60
  -3  -5  -2  260.67    8.00
  -3  -5  -2  246.28    7.40
  -3  -5  -2  272.97   10.50
   3   5   2  270.27   11.90
   3   5   2  265.57    5.90
   3   5   2  254.07    8.70
   3   5   2  264.07    8.90
  -4  -5  -2   52.99    5.00
  -4  -5  -2   56.39    3.20
  -4  -5  -2   50.59    3.30
   4   5   2   57.49    4.20
   4   5   2   57.29    3.90
   4   5   2   52.09    6.00
  -5  -5  -2    1.90    1.10
  -5  -5  -2    1.00    1.10
  -5  -5  -2    0.40    1.80
   5   5   2    1.00    2.40
   5   5   2    1.40    1.30
   5   5   2    1.50    1.30
  -6  -5  -2   59.39    6.10
  -6  -5  -2   58.79    3.90
  -6  -5  -2   63.49    3.90
   6   5   2   53.39    4.70
   6   5   2   58.09    4.50
   6   5   2   53.99    8.00
  -7  -5  -2    0.70    2.20
  -7  -5  -2    3.20    1.60
  -7  -5  -2    2.00    1.40
   7   5   2    6.10    3.90
   7   5   2   -1.00    1.00
  -8  -5  -2    1.40    1.20
  -8  -5  -2    0.00    0.80
  -8  -5  -2    2.00    2.30
  -8  -5  -2    1.10    1.40
   8   5   2    3.70    4.20
   8   5   2    1.20    1.70
  -9  -5  -2    6.10    2.10
  -9  -5  -2   11.30    2.40
  -9  -5  -2   17.40    4.70
  -9  -5  -2    8.30    1.50
   9   5   2    4.80    4.50
   9   5   2   10.80    2.80
 -10  -5  -2    1.60    2.70
 -10  -5  -2    0.20    1.50
 -10  -5  -2    2.60    1.10
 -10  -5  -2   -0.20    1.40
  10   5   2    1.70    2.10
  10   5   2   -4.90    3.10
 -11  -5  -2    7.70    3.70
 -11  -5  -2    7.70    2.40
 -11  -5  -2    5.60    1.50
 -11  -5  -2    7.20    2.20
  11   5   2    6.60    4.70
 -12  -5  -2   52.19    8.50
 -12  -5  -2   61.69    5.70
  12   5   2   31.40    8.40
  15  -6  -2   -1.00    2.40
  15  -6  -2   -2.90    1.60
  15  -6  -2   -1.70    3.00
 -15   6   2   -2.40    2.10
 -15   6   2   -1.40    5.00
 -15   6   2    2.80    3.00
 -15   6   2   -1.20    0.90
  14  -6  -2  150.58    7.90
  14  -6  -2  155.68   14.60
  14  -6  -2  148.79   10.60
 -14   6   2  140.79   14.90
 -14   6   2  144.49    4.70
 -14   6   2  145.19    9.30
 -14   6   2  132.69    8.70
  13  -6  -2    6.40    3.00
  13  -6  -2    3.70    2.30
  13  -6  -2    5.00    2.10
 -13   6   2    2.80    2.40
 -13   6   2   10.10    5.50
 -13   6   2    6.30    2.70
  12  -6  -2   -1.20    1.90
  12  -6  -2    1.00    1.60
  12  -6  -2    1.30    1.70
 -12   6   2    2.20    3.60
 -12   6   2   -0.20    1.70
 -12   6   2    2.60    1.90
  11  -6  -2    9.20    2.30
  11  -6  -2   12.50    3.00
  11  -6  -2   10.10    3.10
 -11   6   2   13.20    3.20
 -11   6   2   11.60    4.20
 -11   6   2    7.40    2.70
  10  -6  -2   16.30    3.90
  10  -6  -2   12.70    3.50
  10  -6  -2   12.60    2.50
 -10   6   2   17.00    4.80
 -10   6   2   15.80    3.30
 -10   6   2   11.00    2.80
   9  -6  -2  116.29    7.30
   9  -6  -2  116.99    5.80
   9  -6  -2  113.19    6.30
  -9   6   2  119.89    6.80
  -9   6   2  121.79    9.10
  -9   6   2  113.19    6.20
   8  -6  -2  118.89    5.80
   8  -6  -2  108.59    5.90
   8  -6  -2  109.99    6.70
  -8   6   2  115.79    5.90
  -8   6   2  121.09    6.60
  -8   6   2  123.29    8.30
   7  -6  -2   29.00    2.90
   7  -6  -2   25.50    1.60
   7  -6  -2   27.70    3.40
  -7   6   2   23.10    2.80
  -7   6   2   24.70    3.40
  -7   6   2   20.40    3.60
  -7   6   2   27.50    2.60
   6  -6  -2   20.40    2.50
   6  -6  -2   18.00    2.90
  -6   6   2   25.90    3.90
  -6   6   2   20.10    2.20
  -6   6   2   15.70    2.40
  -6   6   2   17.90    2.90
  -6   6   2   18.30    1.30
   5  -6  -2   58.79    3.80
   5  -6  -2   57.39    4.20
  -5   6   2   54.79    2.30
  -5   6   2   60.79    2.90
  -5   6   2   63.49    4.30
  -5   6   2   56.79    4.30
  -5   6   2   63.79    3.80
   4  -6  -2  115.89    5.80
   4  -6  -2  117.39    5.50
  -4   6   2  123.09    5.30
  -4   6   2  123.69    6.00
  -4   6   2  115.79    5.80
   3  -6  -2  358.16    9.40
   3  -6  -2  343.67   10.60
   3  -6  -2  358.06    7.90
   3  -6  -2  357.16   10.80
  -3   6   2  358.16    7.70
  -3   6   2  369.66   11.20
  -3   6   2  359.16   10.90
  -3   6   2  350.76    8.40
   2  -6  -2  351.06    9.40
   2  -6  -2  355.56   10.70
   2  -6  -2  369.16   10.60
  -2   6   2  295.97   10.50
  -2   6   2  352.76    8.00
  -2   6   2  356.56   11.10
  -2   6   2  333.27   10.40
   1  -6  -2   20.70    2.90
   1  -6  -2   20.30    1.80
   1  -6  -2   21.40    2.60
  -1   6   2   19.30    3.00
  -1   6   2   18.10    1.80
  -1   6   2   21.70    1.70
  -1   6   2   21.90    2.60
   0  -6  -2    2.30    0.90
   0  -6  -2    2.50    1.40
   0  -6  -2    2.70    1.10
   0  -6  -2    4.50    1.50
   0   6   2    4.20    1.10
   0   6   2    5.60    1.50
   0   6   2    1.70    1.50
   0   6   2    2.30    0.80
  -1  -6  -2   89.59    5.40
  -1  -6  -2  100.39    3.90
   1   6   2   94.49    6.00
   1   6   2   93.09    5.00
  -2  -6  -2   38.50    3.00
  -2  -6  -2   41.10    2.60
  -2  -6  -2   41.70    3.90
   2   6   2   39.00    3.30
   2   6   2   42.20    4.60
   2   6   2   40.80    3.40
   2   6   2   39.90    1.90
  -3  -6  -2   52.49    3.50
  -3  -6  -2   45.60    4.50
  -3  -6  -2   52.19    3.10
   3   6   2   47.70    5.40
   3   6   2   50.49    3.90
   3   6   2   53.49    2.00
   3   6   2   54.69    4.00
  -4  -6  -2  152.28    8.30
  -4  -6  -2  140.89    6.00
  -4  -6  -2  146.69    5.70
   4   6   2  167.18    7.50
   4   6   2  131.79    6.50
   4   6   2  145.09    9.80
  -5  -6  -2   37.10    3.00
  -5  -6  -2   38.30    5.30
  -5  -6  -2   38.70    3.30
   5   6   2   35.10    3.90
   5   6   2   39.30    3.90
   5   6   2   36.50    6.30
  -6  -6  -2   30.30    4.90
  -6  -6  -2   34.60    3.10
  -6  -6  -2   40.00    3.50
   6   6   2   43.20    7.30
   6   6   2   40.00    4.00
  -7  -6  -2   55.49    5.90
  -7  -6  -2   74.49    7.10
   7   6   2   56.09    8.70
   7   6   2   72.29    5.50
  -8  -6  -2    0.60    1.10
  -8  -6  -2    4.10    1.90
  -8  -6  -2   -1.70    2.00
   8   6   2    1.60    4.10
   8   6   2    0.30    1.00
   8   6   2    3.90    1.80
  -9  -6  -2   15.00    2.40
  -9  -6  -2   24.80    5.50
  -9  -6  -2   26.20    3.60
   9   6   2   14.20    3.30
   9   6   2   15.40    8.20
   9   6   2   25.40    4.80
 -10  -6  -2   72.29    5.40
 -10  -6  -2   64.29    7.90
 -10  -6  -2   63.49    5.20
  10   6   2   59.79    6.90
  10   6   2   68.09    6.20
  10   6   2   54.29   10.20
 -11  -6  -2    0.70    3.60
 -11  -6  -2    6.20    2.10
 -11  -6  -2    3.00    4.10
  11   6   2    6.30    2.70
  11   6   2    9.80    5.90
 -12  -6  -2    5.10    2.60
 -12  -6  -2    7.60    4.20
  12   6   2    5.50    6.00
  12   6   2    2.00    2.50
  15  -7  -2   17.90    4.30
  15  -7  -2   11.40    2.90
  15  -7  -2    9.30    3.90
 -15   7   2   13.50    5.50
 -15   7   2    6.20    2.90
 -15   7   2   13.80    2.30
 -15   7   2   10.50    5.90
  14  -7  -2   83.19    7.60
  14  -7  -2   80.89    8.00
  14  -7  -2   73.09    5.70
 -14   7   2   73.59    6.50
 -14   7   2   79.99    7.30
 -14   7   2   74.09   12.00
  13  -7  -2    0.30    2.40
  13  -7  -2    1.40    1.60
  13  -7  -2    1.80    2.10
 -13   7   2   -0.10    1.80
 -13   7   2   -4.30    3.30
 -13   7   2    2.30    2.20
  12  -7  -2    0.10    2.30
  12  -7  -2    0.80    1.80
  12  -7  -2   -0.60    1.20
 -12   7   2   -0.20    1.30
 -12   7   2   -0.50    3.10
 -12   7   2   -2.10    2.10
  11  -7  -2   10.80    3.20
  11  -7  -2   13.30    2.90
  11  -7  -2   13.70    2.90
 -11   7   2   23.40    8.70
 -11   7   2   11.20    3.90
 -11   7   2    7.70    3.30
  10  -7  -2   62.59    6.20
  10  -7  -2   65.39    6.10
  10  -7  -2   56.59    4.50
 -10   7   2   57.39    4.80
 -10   7   2   63.79    5.50
 -10   7   2   52.39    7.70
   9  -7  -2   18.30    3.70
   9  -7  -2   21.50    3.10
  -9   7   2   21.90    3.80
  -9   7   2   18.60    2.70
  -9   7   2   17.50    4.40
  -9   7   2   18.90    3.40
   8  -7  -2   20.80    2.90
   8  -7  -2   22.60    3.80
  -8   7   2   19.70    4.20
  -8   7   2   19.80    2.30
  -8   7   2   25.50    3.10
  -8   7   2   22.00    3.60
   7  -7  -2    2.90    1.70
   7  -7  -2    1.70    1.30
  -7   7   2    2.30    1.60
  -7   7   2    0.80    1.60
  -7   7   2    3.30    1.50
   6  -7  -2   56.19    4.10
   6  -7  -2   68.99    5.00
  -6   7   2   62.19    3.00
  -6   7   2   64.29    4.10
  -6   7   2   66.29    5.20
  -6   7   2   58.09    2.50
  -6   7   2   62.29    4.80
   5  -7  -2  134.29    6.80
   5  -7  -2  139.29    6.30
  -5   7   2  135.59    6.80
  -5   7   2  140.79    6.10
  -5   7   2  136.19    7.00
  -5   7   2  145.29    4.40
   4  -7  -2  116.99    4.10
   4  -7  -2  126.59    6.20
   4  -7  -2  120.79    4.70
   4  -7  -2  112.69    5.70
  -4   7   2  111.69    6.00
  -4   7   2  115.49    4.20
  -4   7   2  114.19    6.10
   3  -7  -2   98.09    5.40
   3  -7  -2   95.19    3.30
   3  -7  -2  106.29    4.50
   3  -7  -2  101.29    5.50
  -3   7   2  101.99    3.30
  -3   7   2   95.09    5.40
  -3   7   2   96.49    5.60
  -3   7   2   95.99    3.40
  -3   7   2   95.79    3.70
   2  -7  -2    2.30    1.40
   2  -7  -2    1.40    1.40
  -2   7   2    0.90    0.70
  -2   7   2    0.80    1.20
  -2   7   2    1.50    1.40
   1  -7  -2    9.20    2.20
   1  -7  -2    8.70    2.00
   1  -7  -2    9.50    1.40
  -1   7   2    6.80    2.10
  -1   7   2    7.10    1.10
  -1   7   2    8.40    1.40
  -1   7   2    8.90    2.10
   0  -7  -2  233.58    8.30
   0  -7  -2  233.48    6.80
   0  -7  -2  241.58    9.30
   0  -7  -2  234.18    6.60
   0   7   2  235.28    7.00
   0   7   2  234.98    9.80
   0   7   2  235.98    8.80
  -1  -7  -2   38.60    3.80
  -1  -7  -2   36.00    2.40
  -1  -7  -2   35.20    2.50
  -1  -7  -2   36.20    3.20
   1   7   2   35.90    3.20
   1   7   2   39.70    3.60
   1   7   2   39.40    4.40
  -2  -7  -2   52.29    3.70
  -2  -7  -2   49.50    3.00
  -2  -7  -2   48.80    4.50
   2   7   2   49.40    5.30
   2   7   2   51.59    3.90
   2   7   2   55.59    4.20
  -3  -7  -2   97.49    4.40
  -3  -7  -2   97.79    6.60
  -3  -7  -2  102.39    5.20
   3   7   2   95.79    2.90
   3   7   2   95.19    5.50
   3   7   2   99.59    5.80
   3   7   2  106.39    8.10
  -4  -7  -2   11.50    3.10
  -4  -7  -2    6.50    1.50
  -4  -7  -2   11.80    2.20
   4   7   2    7.80    2.30
   4   7   2   12.50    2.70
   4   7   2    7.30    3.40
  -5  -7  -2  172.18    9.70
  -5  -7  -2  165.98    7.00
  -5  -7  -2  160.48    6.50
   5   7   2  170.28   12.00
   5   7   2  168.48    8.10
  -6  -7  -2   10.80    2.20
  -6  -7  -2    6.70    2.90
  -6  -7  -2   12.90    2.40
   6   7   2   10.80    2.80
   6   7   2   15.20    5.10
  -7  -7  -2    6.20    1.80
  -7  -7  -2    3.80    2.70
  -7  -7  -2    8.40    2.20
   7   7   2    9.00    7.60
   7   7   2    7.50    2.70
  -8  -7  -2    2.10    2.50
  -8  -7  -2    3.40    1.70
  -8  -7  -2    1.70    1.70
   8   7   2   -1.40    3.80
   8   7   2    3.20    2.10
   8   7   2    4.30    2.30
  -9  -7  -2    3.20    1.60
  -9  -7  -2    5.30    2.20
  -9  -7  -2    1.90    2.60
   9   7   2    7.70    3.00
   9   7   2    3.90    2.20
   9   7   2    7.40    4.90
 -10  -7  -2   16.80    3.00
 -10  -7  -2    6.70    3.50
 -10  -7  -2   14.20    3.00
  10   7   2   13.70    6.00
  10   7   2   12.00    3.30
 -11  -7  -2    0.10    1.50
 -11  -7  -2    3.60    3.20
 -11  -7  -2    5.50    2.40
  11   7   2    4.30    2.50
  15  -8  -2    4.60    2.30
  15  -8  -2   15.50    4.20
  15  -8  -2   10.80    3.80
 -15   8   2    6.90    3.60
 -15   8   2   16.90   11.00
 -15   8   2    4.10    3.60
  14  -8  -2    8.80    3.30
  14  -8  -2   12.70    4.00
  14  -8  -2   13.00    2.80
 -14   8   2   15.60    3.60
 -14   8   2    6.50    6.00
 -14   8   2   11.40    3.90
  13  -8  -2    1.30    1.80
  13  -8  -2    2.30    1.90
  13  -8  -2    3.70    2.70
 -13   8   2    2.00    1.90
 -13   8   2    0.10    2.40
 -13   8   2    0.20    3.80
 -13   8   2    1.30    1.60
  12  -8  -2    1.10    1.60
  12  -8  -2   10.90    3.30
 -12   8   2    7.00    2.90
 -12   8   2   10.00    4.40
 -12   8   2    3.40    1.90
 -12   8   2    5.90    2.20
  11  -8  -2   -0.30    1.30
  11  -8  -2    0.40    2.00
  11  -8  -2    0.20    0.90
 -11   8   2    0.30    1.90
 -11   8   2   -0.90    2.30
 -11   8   2   -0.20    1.00
 -11   8   2    0.60    1.80
  10  -8  -2   26.50    2.10
  10  -8  -2   22.80    3.40
  10  -8  -2   21.40    4.40
 -10   8   2   26.30    2.80
 -10   8   2   18.40    3.40
 -10   8   2   30.30    4.70
 -10   8   2   25.40    5.20
   9  -8  -2   69.49    5.00
   9  -8  -2   64.59    5.90
  -9   8   2   63.39    4.80
  -9   8   2   67.19    3.80
  -9   8   2   73.19    7.20
  -9   8   2   63.09    5.60
   8  -8  -2   29.50    3.40
   8  -8  -2   34.70    4.30
  -8   8   2   30.70    5.10
  -8   8   2   35.80    3.60
  -8   8   2   33.40    4.70
   7  -8  -2   65.99    5.30
   7  -8  -2   69.69    4.70
  -7   8   2   62.89    2.70
  -7   8   2   70.89    4.60
  -7   8   2   62.09    5.20
  -7   8   2   66.99    5.70
   6  -8  -2    6.40    2.10
   6  -8  -2    6.20    1.90
  -6   8   2    4.30    2.00
  -6   8   2    3.50    1.00
  -6   8   2    5.80    1.80
  -6   8   2    6.10    2.30
   5  -8  -2  162.78    5.50
   5  -8  -2  153.68    7.10
   5  -8  -2  157.08    7.60
  -5   8   2  155.68    7.80
  -5   8   2  170.28    8.00
  -5   8   2  163.78    5.10
  -5   8   2  155.58    6.60
  -5   8   2  157.98    5.30
   4  -8  -2  119.29    6.20
   4  -8  -2  114.29    4.10
   4  -8  -2  117.59    6.40
   4  -8  -2  120.99    5.00
  -4   8   2  117.79    3.70
  -4   8   2  107.19    6.30
  -4   8   2  120.49    6.80
   3  -8  -2   54.09    3.60
   3  -8  -2   63.89    4.60
   3  -8  -2   62.49    4.60
  -3   8   2   56.39    2.80
  -3   8   2   60.89    4.80
  -3   8   2   57.09    4.50
  -3   8   2   56.49    2.70
   2  -8  -2    3.50    1.70
   2  -8  -2    2.90    1.50
  -2   8   2    3.20    0.90
  -2   8   2    3.20    1.80
  -2   8   2    4.30    1.60
   1  -8  -2   44.40    3.80
   1  -8  -2   43.20    2.60
   1  -8  -2   44.50    4.00
  -1   8   2   45.10    4.00
  -1   8   2   43.40    4.30
  -1   8   2   42.60    2.70
  -1   8   2   44.90    2.20
   0  -8  -2  158.38    5.40
   0  -8  -2  157.88    6.90
   0  -8  -2  159.98    7.80
   0   8   2  148.99    7.10
   0   8   2  140.29    7.90
   0   8   2  148.99    5.60
  -1  -8  -2   16.20    1.90
  -1  -8  -2   15.50    2.50
  -1  -8  -2   10.70    1.80
  -1  -8  -2    9.60    2.60
   1   8   2   14.10    2.60
   1   8   2   11.30    3.30
   1   8   2   20.10    2.40
   1   8   2   15.50    2.90
  -2  -8  -2   23.80    3.10
  -2  -8  -2   25.50    4.00
  -2  -8  -2   23.50    2.20
   2   8   2   21.50    3.00
   2   8   2   21.80    1.60
   2   8   2   18.20    3.00
   2   8   2   20.30    4.20
  -3  -8  -2   28.70    3.10
  -3  -8  -2   26.60    2.50
  -3  -8  -2   35.00    4.30
   3   8   2   30.60    1.50
   3   8   2   28.70    3.60
   3   8   2   30.00    3.50
   3   8   2   25.90    4.80
  -4  -8  -2   52.89    4.10
  -4  -8  -2   53.19    5.50
  -4  -8  -2   50.89    3.50
   4   8   2   61.09    7.30
   4   8   2   49.20    4.60
   4   8   2   50.19    6.00
  -5  -8  -2    4.50    2.60
  -5  -8  -2    7.10    1.80
  -5  -8  -2    9.00    2.20
   5   8   2    4.90    2.30
   5   8   2    9.00    2.90
   5   8   2    6.40    3.70
  -6  -8  -2  148.19    6.90
[truncated: 1,950,298 more chars]
