# Supplementary material for: Isolation and reactivity of an elusive diazoalkene
Source: Springer Nature journal article supplement (doi:10.1038/s41557-021-00675-5), 2021-04-29
Supplement: 41557_2021_675_MOESM7_ESM.mol [file 41557_2021_675_MOESM7_ESM.mol]

nchem.20081997B-comp3.mol
  ChemDraw02182123572D

 44 48  0  0  0  0  0  0  0  0999 V2000
   -2.2784   -0.9500    0.0000 C   0  0  0  0  0  0  0  0  0  0  0  0
   -1.5476   -0.3816    0.0000 N   0  0  0  0  0  0  0  0  0  0  0  0
   -1.0096   -0.6921    0.0000 C   0  0  0  0  0  0  0  0  0  0  0  0
   -0.4717   -0.3816    0.0000 C   0  0  0  0  0  0  0  0  0  0  0  0
   -1.0096   -1.3132    0.0000 C   0  0  0  0  0  0  0  0  0  0  0  0
    0.0657   -0.6921    0.0000 C   0  0  0  0  0  0  0  0  0  0  0  0
   -0.4717    0.2389    0.0000 N   0  0  0  0  0  0  0  0  0  0  0  0
   -0.6499    0.7929    0.0000 C   0  0  0  0  0  0  0  0  0  0  0  0
   -0.2815    1.2930    0.0000 C   0  0  0  0  0  0  0  0  0  0  0  0
   -1.2669    0.8622    0.0000 O   0  0  0  0  0  0  0  0  0  0  0  0
    2.0656    0.8391    0.0000 C   0  0  0  0  0  0  0  0  0  0  0  0
   -1.7774    0.2263    0.0000 H   0  0  0  0  0  0  0  0  0  0  0  0
    2.5455    0.1681    0.0000 C   0  0  0  0  0  0  0  0  0  0  0  0
    3.3666    0.2481    0.0000 C   0  0  0  0  0  0  0  0  0  0  0  0
    3.7079    0.9992    0.0000 C   0  0  0  0  0  0  0  0  0  0  0  0
    3.2280    1.6703    0.0000 C   0  0  0  0  0  0  0  0  0  0  0  0
    2.4069    1.5903    0.0000 C   0  0  0  0  0  0  0  0  0  0  0  0
   -2.9932   -0.5380    0.0000 C   0  0  0  0  0  0  0  0  0  0  0  0
   -3.7073   -0.9500    0.0000 C   0  0  0  0  0  0  0  0  0  0  0  0
   -3.7073   -1.7750    0.0000 C   0  0  0  0  0  0  0  0  0  0  0  0
   -2.9932   -2.1870    0.0000 C   0  0  0  0  0  0  0  0  0  0  0  0
   -2.2784   -1.7750    0.0000 C   0  0  0  0  0  0  0  0  0  0  0  0
   -2.9933    0.2870    0.0000 C   0  0  0  0  0  0  0  0  0  0  0  0
   -1.5639   -2.1875    0.0000 C   0  0  0  0  0  0  0  0  0  0  0  0
    2.3783   -0.3138    0.0000 C   0  0  0  0  0  0  0  0  0  0  0  0
    1.9270    2.2614    0.0000 C   0  0  0  0  0  0  0  0  0  0  0  0
    0.0653   -1.5171    0.0000 C   0  0  0  0  0  0  0  0  0  0  0  0
    0.7795   -1.9300    0.0000 C   0  0  0  0  0  0  0  0  0  0  0  0
    1.4942   -1.5171    0.0000 C   0  0  0  0  0  0  0  0  0  0  0  0
    1.4942   -0.6921    0.0000 C   0  0  0  0  0  0  0  0  0  0  0  0
    0.7795   -0.2792    0.0000 C   0  0  0  0  0  0  0  0  0  0  0  0
    0.5384    1.2015    0.0000 C   0  0  0  0  0  0  0  0  0  0  0  0
    1.0277    1.8657    0.0000 C   0  0  0  0  0  0  0  0  0  0  0  0
    0.6970    2.6216    0.0000 C   0  0  0  0  0  0  0  0  0  0  0  0
   -0.1229    2.7131    0.0000 C   0  0  0  0  0  0  0  0  0  0  0  0
   -0.6121    2.0489    0.0000 C   0  0  0  0  0  0  0  0  0  0  0  0
    2.2683    3.0125    0.0000 C   0  0  0  0  0  0  0  0  0  0  0  0
    1.1059    2.1813    0.0000 C   0  0  0  0  0  0  0  0  0  0  0  0
    2.8245   -1.0077    0.0000 C   0  0  0  0  0  0  0  0  0  0  0  0
    1.5542   -0.3531    0.0000 C   0  0  0  0  0  0  0  0  0  0  0  0
   -0.8495   -1.7750    0.0000 C   0  0  0  0  0  0  0  0  0  0  0  0
   -1.5639   -3.0125    0.0000 C   0  0  0  0  0  0  0  0  0  0  0  0
   -2.2789    0.6997    0.0000 C   0  0  0  0  0  0  0  0  0  0  0  0
   -3.7079    0.6994    0.0000 C   0  0  0  0  0  0  0  0  0  0  0  0
  1  2  1  0      
  2  3  1  0      
  3  4  2  0      
  3  5  1  0      
  4  6  1  0      
  4  7  1  0      
  7  8  1  0      
  8  9  1  0      
  8 10  2  0      
  7 11  1  0      
  2 12  1  0      
 10 12  1  6      
 11 13  2  0      
 13 14  1  0      
 14 15  2  0      
 15 16  1  0      
 16 17  2  0      
 17 11  1  0      
  1 18  2  0      
 18 19  1  0      
 19 20  2  0      
 20 21  1  0      
 21 22  2  0      
 22  1  1  0      
 18 23  1  0      
 22 24  1  0      
 13 25  1  0      
 17 26  1  0      
  6 27  2  0      
 27 28  1  0      
 28 29  2  0      
 29 30  1  0      
 30 31  2  0      
 31  6  1  0      
  9 32  2  0      
 32 33  1  0      
 33 34  2  0      
 34 35  1  0      
 35 36  2  0      
 36  9  1  0      
 26 37  1  0      
 26 38  1  0      
 25 39  1  0      
 25 40  1  0      
 24 41  1  0      
 24 42  1  0      
 23 43  1  0      
 23 44  1  0      
M  END
