# Supplementary material for: Isolation and reactivity of an elusive diazoalkene
Source: Springer Nature journal article supplement (doi:10.1038/s41557-021-00675-5), 2021-04-29
Supplement: 41557_2021_675_MOESM9_ESM.cif [file 41557_2021_675_MOESM9_ESM.cif]

data_0923_aba2
_audit_creation_date               2020-01-13
_audit_creation_method
;
Olex2 1.3
(compiled Nov 21 2019 18:26:39 for OlexSys, GUI svn.r6003)
;
_shelx_SHELXL_version_number       '2018/3'
loop_
  _audit_author_name
  _audit_author_email
  _audit_author_address
 'Hansmann, M.M.' mhansma@gwdg.de
;
Georg-August-Universitaet Goettingen
Institut fuer Organische und Biomolekulare Chemie 
Tammannstrasse 2
Goettingen
D-37077
Germany
;
 'Golz, C.' 'cgolz@gwdg.de '
;
Georg-August-Universitaet Goettingen
Institut fuer Organische und Biomolekulare Chemie 
Tammannstrasse 2
Goettingen
D-37077
Germany
;

_audit_contact_author_address
;
Georg-August-Universitaet Goettingen
Institut fuer Organische und Biomolekulare Chemie 
Tammannstrasse 2
Goettingen
D-37077
Germany
;
_audit_contact_author_email        'cgolz@gwdg.de '
_audit_contact_author_name         'Golz, C.'
_audit_contact_author_phone        '+49(551) 39-21751'
_publ_contact_author_id_orcid      ''
_publ_section_references
;
Dolomanov, O.V., Bourhis, L.J., Gildea, R.J, Howard, J.A.K. & Puschmann, H.
 (2009), J. Appl. Cryst. 42, 339-341.

Sheldrick, G.M. (2008). Acta Cryst. A64, 112-122.

Sheldrick, G.M. (2015). Acta Cryst. A71, 3-8.
;
_chemical_name_common              ?
_chemical_name_systematic          ?
_chemical_formula_moiety           'C40 H44 N4'
_chemical_formula_sum              'C40 H44 N4'
_chemical_formula_weight           580.79
_chemical_absolute_configuration   unk
_chemical_melting_point            ?
loop_
  _atom_type_symbol
  _atom_type_description
  _atom_type_scat_dispersion_real
  _atom_type_scat_dispersion_imag
  _atom_type_scat_source
 'C' 'C' 0.0033 0.0016 'International Tables Vol C Tables 4.2.6.8 and 6.1.1.4'
 'H' 'H' 0.0000 0.0000 'International Tables Vol C Tables 4.2.6.8 and 6.1.1.4'
 'N' 'N' 0.0061 0.0033 'International Tables Vol C Tables 4.2.6.8 and 6.1.1.4'

_shelx_space_group_comment
;
The symmetry employed for this shelxl refinement is uniquely defined
by the following loop, which should always be used as a source of
symmetry information in preference to the above space-group names.
They are only intended as comments.
;
_space_group_crystal_system        'orthorhombic'
_space_group_IT_number             41
_space_group_name_H-M_alt          'A e a 2'
_space_group_name_Hall             'A 2 -2ac'
loop_
  _space_group_symop_operation_xyz
 'x, y, z'
 '-x, -y, z'
 'x+1/2, -y+1/2, z'
 '-x+1/2, y+1/2, z'
 'x, y+1/2, z+1/2'
 '-x, -y+1/2, z+1/2'
 'x+1/2, -y+1, z+1/2'
 '-x+1/2, y+1, z+1/2'

_cell_length_a                     20.415(4)
_cell_length_b                     22.313(4)
_cell_length_c                     14.878(4)
_cell_angle_alpha                  90
_cell_angle_beta                   90
_cell_angle_gamma                  90
_cell_volume                       6777(2)
_cell_formula_units_Z              8
_cell_measurement_reflns_used      9982
_cell_measurement_temperature      100.0
_cell_measurement_theta_max        22.686
_cell_measurement_theta_min        2.582
_shelx_estimated_absorpt_T_max     ?
_shelx_estimated_absorpt_T_min     ?
_exptl_absorpt_coefficient_mu      0.067
_exptl_absorpt_correction_T_max    0.9010
_exptl_absorpt_correction_T_min    0.8094
_exptl_absorpt_correction_type     multi-scan
_exptl_absorpt_process_details
;
SADABS-2016/2 (Bruker,2016/2) was used for absorption correction.
wR2(int) was 0.0922 before and 0.0771 after correction.
The Ratio of minimum to maximum transmission is 0.8983.
The \l/2 correction factor is Not present.
;
_exptl_absorpt_special_details     ?
_exptl_crystal_colour              red
_exptl_crystal_colour_primary      red
_exptl_crystal_density_diffrn      1.138
_exptl_crystal_density_meas        ?
_exptl_crystal_density_method      ?
_exptl_crystal_description         plate
_exptl_crystal_F_000               2496
loop_
  _exptl_crystal_face_index_h
  _exptl_crystal_face_index_k
  _exptl_crystal_face_index_l
  _exptl_crystal_face_perp_dist
 -2.00 -1.00 0.00 0.0290
 2.00 1.00 0.00 0.0380
 1.00 0.00 1.00 0.1220
 -1.00 -2.00 2.00 0.1210
 1.00 2.00 -2.00 0.0880
 -1.00 0.00 -1.00 0.0810
 -1.00 -1.00 0.00 0.0530
 -2.00 -2.00 -1.00 0.0360
 2.00 2.00 1.00 0.0540
 -1.00 -2.00 -1.00 0.0370
 1.00 2.00 1.00 0.0570
 0.00 1.00 0.00 0.0660
 0.00 -1.00 0.00 0.0960
 1.00 -2.00 -2.00 0.0660
 -1.00 2.00 2.00 0.0660
 -2.00 2.00 1.00 0.0300
 2.00 -2.00 -1.00 0.0420
 1.00 0.00 0.00 0.0510
 -1.00 0.00 0.00 0.0280

_exptl_crystal_recrystallization_method  ?
_exptl_crystal_size_max            0.299
_exptl_crystal_size_mid            0.094
_exptl_crystal_size_min            0.077
_exptl_transmission_factor_max     ?
_exptl_transmission_factor_min     ?
_diffrn_reflns_av_R_equivalents    0.0689
_diffrn_reflns_av_unetI/netI       0.0315
_diffrn_reflns_Laue_measured_fraction_full  0.997
_diffrn_reflns_Laue_measured_fraction_max  0.997
_diffrn_reflns_limit_h_max         24
_diffrn_reflns_limit_h_min         -24
_diffrn_reflns_limit_k_max         26
_diffrn_reflns_limit_k_min         -26
_diffrn_reflns_limit_l_max         17
_diffrn_reflns_limit_l_min         -17
_diffrn_reflns_number              89996
_diffrn_reflns_point_group_measured_fraction_full  0.998
_diffrn_reflns_point_group_measured_fraction_max  0.998
_diffrn_reflns_theta_full          25.156
_diffrn_reflns_theta_max           25.156
_diffrn_reflns_theta_min           1.924
_diffrn_ambient_temperature        100.0
_diffrn_detector_area_resol_mean   ?
_diffrn_measured_fraction_theta_full  0.997
_diffrn_measured_fraction_theta_max  0.997
_diffrn_measurement_device_type    'Bruker D8 Venture AgMo Dual Source'
_diffrn_measurement_method         '\f and \w scans'
_diffrn_radiation_type             MoK\a
_diffrn_radiation_wavelength       0.71073
_diffrn_source                     ?
_diffrn_source_current             1.4
_diffrn_source_power               0.07
_diffrn_source_voltage             50.0
_diffrn_special_details           
 'Red plates only found in a matrix of colourless amorphous material (decomposition product?). Crystal diffracts rather weak and unfortunately there is a lot of ice formation during data collection (53 hours).'
_diffrn_standards_number           0
_reflns_Friedel_coverage           0.918
_reflns_Friedel_fraction_full      0.998
_reflns_Friedel_fraction_max       0.998
_reflns_number_gt                  5211
_reflns_number_total               6046
_reflns_special_details
;
 Reflections were merged by SHELXL according to the crystal
 class for the calculation of statistics and refinement.
 
 _reflns_Friedel_fraction is defined as the number of unique
 Friedel pairs measured divided by the number that would be
 possible theoretically, ignoring centric projections and
 systematic absences. Completness statistics refer to single and
 composite reflections containing twin component 1 only.
;
_reflns_threshold_expression       'I > 2\s(I)'
_computing_cell_refinement         'SAINT V8.40A (?, 2016)'
_computing_data_collection         ?
_computing_data_reduction          'SAINT V8.40A (?, 2016)'
_computing_molecular_graphics      'Olex2 1.3 (Dolomanov et al., 2009)'
_computing_publication_material    'Olex2 1.3 (Dolomanov et al., 2009)'
_computing_structure_refinement    'XL  (Sheldrick, 2008)'
_computing_structure_solution      'XT  (Sheldrick, 2015)'
_refine_diff_density_max           0.313
_refine_diff_density_min           -0.271
_refine_diff_density_rms           0.069
_refine_ls_abs_structure_details
;
 Refined as a perfect inversion twin.
;
_refine_ls_abs_structure_Flack     0.5
_refine_ls_extinction_coef         0.0056(11)
_refine_ls_extinction_expression  
 'Fc^*^=kFc[1+0.001xFc^2^\l^3^/sin(2\q)]^-1/4^'
_refine_ls_extinction_method       'SHELXL-2018/3 (Sheldrick 2018)'
_refine_ls_goodness_of_fit_ref     1.101
_refine_ls_hydrogen_treatment      constr
_refine_ls_matrix_type             full
_refine_ls_number_parameters       406
_refine_ls_number_reflns           6046
_refine_ls_number_restraints       1
_refine_ls_R_factor_all            0.0819
_refine_ls_R_factor_gt             0.0714
_refine_ls_restrained_S_all        1.101
_refine_ls_shift/su_max            0.000
_refine_ls_shift/su_mean           0.000
_refine_ls_structure_factor_coef   Fsqd
_refine_ls_weighting_details      
 'w=1/[\s^2^(Fo^2^)+(0.1623P)^2^+2.3597P] where P=(Fo^2^+2Fc^2^)/3'
_refine_ls_weighting_scheme        calc
_refine_ls_wR_factor_gt            0.2090
_refine_ls_wR_factor_ref           0.2273
_refine_special_details            ?
_olex2_refinement_description
;
1. Fixed Uiso
 At 1.2 times of:
  All C(H) groups
 At 1.5 times of:
  All C(H,H,H) groups
2.a Ternary CH refined with riding coordinates:
 C16(H16), C19(H19), C35(H35), C38(H38)
2.b Aromatic/amide H refined with riding coordinates:
 C5(H5), C6(H6), C7(H7), C8(H8), C9(H9), C12(H12), C13(H13), C14(H14),
 C24(H24), C25(H25), C26(H26), C27(H27), C28(H28), C31(H31), C32(H32), C33(H33)
2.c Idealised Me refined as rotating group:
 C17(H17A,H17B,H17C), C18(H18A,H18B,H18C), C20(H20A,H20B,H20C), C21(H21A,H21B,
 H21C), C36(H36A,H36B,H36C), C37(H37A,H37B,H37C), C39(H39A,H39B,H39C), C40(H40A,
 H40B,H40C)
;
_atom_sites_solution_hydrogens     geom
_atom_sites_solution_primary       dual
_atom_sites_solution_secondary     ?
loop_
  _atom_site_label
  _atom_site_type_symbol
  _atom_site_fract_x
  _atom_site_fract_y
  _atom_site_fract_z
  _atom_site_U_iso_or_equiv
  _atom_site_adp_type
  _atom_site_occupancy
  _atom_site_site_symmetry_order
  _atom_site_calc_flag
  _atom_site_refinement_flags_posn
  _atom_site_refinement_flags_adp
  _atom_site_refinement_flags_occupancy
  _atom_site_disorder_assembly
  _atom_site_disorder_group
 N1 N 0.2186(2) 0.1871(2) 0.4237(3) 0.0477(10) Uani 1 1 d . . . . .
 N2 N 0.2177(2) 0.1416(2) 0.3827(4) 0.0555(12) Uani 1 1 d . . . . .
 N3 N 0.3244(2) 0.26804(17) 0.4828(3) 0.0402(9) Uani 1 1 d . . . . .
 N4 N 0.3110(2) 0.35850(18) 0.5303(3) 0.0418(9) Uani 1 1 d . . . . .
 C1 C 0.2082(3) 0.2341(2) 0.4681(4) 0.0471(12) Uani 1 1 d . . . . .
 C2 C 0.2561(2) 0.2759(2) 0.4902(3) 0.0427(11) Uani 1 1 d . . . . .
 C3 C 0.2484(2) 0.3346(2) 0.5238(4) 0.0421(10) Uani 1 1 d . . . . .
 C4 C 0.1867(2) 0.3654(2) 0.5454(3) 0.0436(11) Uani 1 1 d . . . . .
 C5 C 0.1813(3) 0.4117(2) 0.6084(4) 0.0487(12) Uani 1 1 d . . . . .
 H5 H 0.218916 0.424325 0.640867 0.058 Uiso 1 1 calc R U . . .
 C6 C 0.1208(3) 0.4394(3) 0.6238(4) 0.0546(13) Uani 1 1 d . . . . .
 H6 H 0.118117 0.471184 0.666177 0.066 Uiso 1 1 calc R U . . .
 C7 C 0.0655(3) 0.4218(3) 0.5790(4) 0.0566(14) Uani 1 1 d . . . . .
 H7 H 0.024867 0.441266 0.589668 0.068 Uiso 1 1 calc R U . . .
 C8 C 0.0698(3) 0.3747(3) 0.5173(4) 0.0518(13) Uani 1 1 d . . . . .
 H8 H 0.031739 0.361599 0.486337 0.062 Uiso 1 1 calc R U . . .
 C9 C 0.1291(3) 0.3474(2) 0.5015(4) 0.0487(12) Uani 1 1 d . . . . .
 H9 H 0.131081 0.315317 0.459522 0.058 Uiso 1 1 calc R U . . .
 C10 C 0.3546(2) 0.2131(2) 0.4519(4) 0.0414(11) Uani 1 1 d . . . . .
 C11 C 0.3750(2) 0.2098(2) 0.3639(4) 0.0446(11) Uani 1 1 d . . . . .
 C12 C 0.4028(3) 0.1555(2) 0.3353(4) 0.0498(12) Uani 1 1 d . . . . .
 H12 H 0.417463 0.151704 0.274980 0.060 Uiso 1 1 calc R U . . .
 C13 C 0.4092(3) 0.1082(2) 0.3925(4) 0.0530(14) Uani 1 1 d . . . . .
 H13 H 0.427423 0.071588 0.371520 0.064 Uiso 1 1 calc R U . . .
 C14 C 0.3891(3) 0.1131(2) 0.4812(4) 0.0491(12) Uani 1 1 d . . . . .
 H14 H 0.394284 0.079737 0.520289 0.059 Uiso 1 1 calc R U . . .
 C15 C 0.3617(2) 0.1655(2) 0.5141(4) 0.0423(11) Uani 1 1 d . . . . .
 C16 C 0.3386(3) 0.1689(2) 0.6112(4) 0.0495(12) Uani 1 1 d . . . . .
 H16 H 0.322135 0.210441 0.622613 0.059 Uiso 1 1 calc R U . . .
 C17 C 0.3948(3) 0.1559(4) 0.6783(5) 0.0703(18) Uani 1 1 d . . . . .
 H17A H 0.409561 0.114390 0.670971 0.105 Uiso 1 1 calc R U . . .
 H17B H 0.379095 0.161925 0.739818 0.105 Uiso 1 1 calc R U . . .
 H17C H 0.431458 0.183189 0.666399 0.105 Uiso 1 1 calc R U . . .
 C18 C 0.2827(3) 0.1252(3) 0.6284(4) 0.0555(13) Uani 1 1 d . . . . .
 H18A H 0.245156 0.135890 0.590525 0.083 Uiso 1 1 calc R U . . .
 H18B H 0.269808 0.127247 0.691805 0.083 Uiso 1 1 calc R U . . .
 H18C H 0.297022 0.084439 0.614000 0.083 Uiso 1 1 calc R U . . .
 C19 C 0.3660(3) 0.2605(2) 0.2954(4) 0.0478(12) Uani 1 1 d . . . . .
 H19 H 0.345509 0.295061 0.327572 0.057 Uiso 1 1 calc R U . . .
 C20 C 0.4316(3) 0.2817(3) 0.2582(4) 0.0606(15) Uani 1 1 d . . . . .
 H20A H 0.460129 0.293776 0.307985 0.091 Uiso 1 1 calc R U . . .
 H20B H 0.424548 0.315867 0.218049 0.091 Uiso 1 1 calc R U . . .
 H20C H 0.452362 0.248959 0.224687 0.091 Uiso 1 1 calc R U . . .
 C21 C 0.3200(3) 0.2421(3) 0.2210(4) 0.0597(15) Uani 1 1 d . . . . .
 H21A H 0.337696 0.206889 0.190020 0.090 Uiso 1 1 calc R U . . .
 H21B H 0.315321 0.275170 0.178154 0.090 Uiso 1 1 calc R U . . .
 H21C H 0.277042 0.232285 0.246524 0.090 Uiso 1 1 calc R U . . .
 C22 C 0.3564(2) 0.3190(2) 0.5049(3) 0.0399(10) Uani 1 1 d . . . . .
 C23 C 0.4268(2) 0.3284(2) 0.5005(4) 0.0449(11) Uani 1 1 d . . . . .
 C24 C 0.4717(3) 0.2853(3) 0.5300(4) 0.0490(12) Uani 1 1 d . . . . .
 H24 H 0.456169 0.248963 0.555354 0.059 Uiso 1 1 calc R U . . .
 C25 C 0.5383(3) 0.2950(2) 0.5227(4) 0.0549(13) Uani 1 1 d . . . . .
 H25 H 0.568145 0.265373 0.543649 0.066 Uiso 1 1 calc R U . . .
 C26 C 0.5616(3) 0.3468(3) 0.4857(6) 0.0663(19) Uani 1 1 d . . . . .
 H26 H 0.607502 0.352823 0.479784 0.080 Uiso 1 1 calc R U . . .
 C27 C 0.5184(3) 0.3904(3) 0.4568(6) 0.074(2) Uani 1 1 d . . . . .
 H27 H 0.534644 0.426992 0.432739 0.089 Uiso 1 1 calc R U . . .
 C28 C 0.4519(3) 0.3810(3) 0.4628(5) 0.0596(15) Uani 1 1 d . . . . .
 H28 H 0.422664 0.410757 0.441045 0.072 Uiso 1 1 calc R U . . .
 C29 C 0.3282(2) 0.4171(2) 0.5668(4) 0.0422(11) Uani 1 1 d . . . . .
 C30 C 0.3175(2) 0.4682(2) 0.5150(4) 0.0453(11) Uani 1 1 d . . . . .
 C31 C 0.3345(3) 0.5232(2) 0.5518(4) 0.0515(13) Uani 1 1 d . . . . .
 H31 H 0.328209 0.558882 0.518041 0.062 Uiso 1 1 calc R U . . .
 C32 C 0.3605(3) 0.5262(3) 0.6375(4) 0.0561(14) Uani 1 1 d . . . . .
 H32 H 0.371068 0.564164 0.662550 0.067 Uiso 1 1 calc R U . . .
 C33 C 0.3712(3) 0.4747(3) 0.6874(4) 0.0518(13) Uani 1 1 d . . . . .
 H33 H 0.389937 0.477908 0.745656 0.062 Uiso 1 1 calc R U . . .
 C34 C 0.3551(2) 0.4177(2) 0.6537(4) 0.0466(12) Uani 1 1 d . . . . .
 C35 C 0.3641(3) 0.3621(3) 0.7097(4) 0.0522(13) Uani 1 1 d . . . . .
 H35 H 0.360017 0.326840 0.668571 0.063 Uiso 1 1 calc R U . . .
 C36 C 0.3099(3) 0.3568(3) 0.7805(5) 0.0618(15) Uani 1 1 d . . . . .
 H36A H 0.309992 0.392666 0.818537 0.093 Uiso 1 1 calc R U . . .
 H36B H 0.317729 0.321298 0.817697 0.093 Uiso 1 1 calc R U . . .
 H36C H 0.267358 0.353115 0.750499 0.093 Uiso 1 1 calc R U . . .
 C37 C 0.4306(3) 0.3589(4) 0.7533(5) 0.0733(19) Uani 1 1 d . . . . .
 H37A H 0.464637 0.364097 0.707486 0.110 Uiso 1 1 calc R U . . .
 H37B H 0.436000 0.319784 0.782380 0.110 Uiso 1 1 calc R U . . .
 H37C H 0.434509 0.390690 0.798427 0.110 Uiso 1 1 calc R U . . .
 C38 C 0.2886(3) 0.4659(2) 0.4205(4) 0.0517(13) Uani 1 1 d . . . . .
 H38 H 0.281808 0.422923 0.403603 0.062 Uiso 1 1 calc R U . . .
 C39 C 0.2219(3) 0.4981(2) 0.4172(4) 0.0550(13) Uani 1 1 d . . . . .
 H39A H 0.190017 0.475903 0.453467 0.082 Uiso 1 1 calc R U . . .
 H39B H 0.206624 0.500224 0.354876 0.082 Uiso 1 1 calc R U . . .
 H39C H 0.226682 0.538775 0.441303 0.082 Uiso 1 1 calc R U . . .
 C40 C 0.3337(4) 0.4950(3) 0.3504(5) 0.0667(17) Uani 1 1 d . . . . .
 H40A H 0.339777 0.537412 0.365124 0.100 Uiso 1 1 calc R U . . .
 H40B H 0.313853 0.491392 0.290687 0.100 Uiso 1 1 calc R U . . .
 H40C H 0.376266 0.474663 0.350738 0.100 Uiso 1 1 calc R U . . .

loop_
  _atom_site_aniso_label
  _atom_site_aniso_U_11
  _atom_site_aniso_U_22
  _atom_site_aniso_U_33
  _atom_site_aniso_U_23
  _atom_site_aniso_U_13
  _atom_site_aniso_U_12
 N1 0.047(2) 0.044(2) 0.052(3) 0.007(2) 0.0033(19) -0.0012(18)
 N2 0.056(3) 0.044(3) 0.066(3) -0.007(2) -0.002(2) -0.0034(19)
 N3 0.045(2) 0.0324(19) 0.043(2) 0.0011(17) -0.0001(17) -0.0008(16)
 N4 0.043(2) 0.037(2) 0.046(2) 0.0023(18) -0.0006(18) 0.0015(15)
 C1 0.045(3) 0.038(3) 0.059(3) 0.002(2) 0.003(2) -0.001(2)
 C2 0.045(2) 0.043(2) 0.041(3) 0.004(2) 0.000(2) 0.004(2)
 C3 0.042(2) 0.041(2) 0.043(3) 0.003(2) 0.000(2) -0.0019(19)
 C4 0.046(3) 0.042(3) 0.043(3) 0.004(2) 0.001(2) 0.0003(19)
 C5 0.047(3) 0.049(3) 0.050(3) 0.003(2) 0.000(2) 0.002(2)
 C6 0.055(3) 0.052(3) 0.057(3) -0.005(3) 0.001(3) 0.009(2)
 C7 0.046(3) 0.059(3) 0.065(4) 0.003(3) 0.004(3) 0.007(2)
 C8 0.044(3) 0.055(3) 0.057(3) 0.006(3) -0.004(2) 0.001(2)
 C9 0.049(3) 0.046(3) 0.051(3) 0.006(2) 0.001(2) -0.002(2)
 C10 0.037(2) 0.036(2) 0.051(3) 0.001(2) 0.000(2) -0.0005(18)
 C11 0.043(2) 0.042(3) 0.049(3) -0.001(2) -0.002(2) -0.004(2)
 C12 0.044(3) 0.045(3) 0.060(3) -0.011(3) 0.002(2) 0.001(2)
 C13 0.048(3) 0.040(3) 0.072(4) -0.009(3) 0.000(2) 0.000(2)
 C14 0.054(3) 0.036(3) 0.057(3) 0.003(2) -0.001(2) -0.002(2)
 C15 0.041(2) 0.035(2) 0.051(3) 0.003(2) -0.003(2) -0.0031(17)
 C16 0.058(3) 0.041(3) 0.050(3) 0.005(2) 0.003(2) -0.006(2)
 C17 0.068(4) 0.082(5) 0.060(4) 0.013(3) -0.011(3) -0.017(3)
 C18 0.057(3) 0.052(3) 0.057(3) 0.003(3) 0.005(3) -0.010(2)
 C19 0.057(3) 0.042(3) 0.044(3) 0.000(2) 0.005(2) -0.002(2)
 C20 0.063(3) 0.063(4) 0.055(3) 0.003(3) 0.006(3) -0.008(3)
 C21 0.073(4) 0.059(3) 0.047(3) 0.003(3) -0.003(3) 0.002(3)
 C22 0.042(2) 0.038(2) 0.039(2) -0.001(2) -0.0001(19) 0.0017(19)
 C23 0.046(3) 0.038(2) 0.050(3) -0.006(2) 0.001(2) -0.0027(19)
 C24 0.048(3) 0.049(3) 0.050(3) -0.003(2) -0.002(2) 0.003(2)
 C25 0.048(3) 0.048(3) 0.069(4) -0.011(3) -0.003(3) 0.003(2)
 C26 0.038(3) 0.049(3) 0.112(6) -0.016(3) 0.004(3) -0.004(2)
 C27 0.057(3) 0.042(3) 0.124(6) -0.002(3) 0.017(4) -0.008(3)
 C28 0.048(3) 0.040(3) 0.091(4) 0.005(3) 0.009(3) 0.008(2)
 C29 0.042(2) 0.035(2) 0.050(3) -0.003(2) -0.003(2) 0.0014(18)
 C30 0.047(3) 0.037(2) 0.052(3) -0.002(2) 0.001(2) 0.0035(19)
 C31 0.058(3) 0.037(3) 0.059(3) -0.001(2) -0.001(3) 0.001(2)
 C32 0.057(3) 0.046(3) 0.065(4) -0.012(3) 0.003(3) -0.009(2)
 C33 0.049(3) 0.054(3) 0.053(3) -0.016(3) -0.005(2) -0.002(2)
 C34 0.045(2) 0.048(3) 0.047(3) -0.004(2) 0.003(2) 0.002(2)
 C35 0.059(3) 0.049(3) 0.048(3) -0.002(2) -0.003(2) 0.011(2)
 C36 0.064(3) 0.061(4) 0.060(4) 0.018(3) 0.002(3) 0.002(3)
 C37 0.062(4) 0.091(5) 0.067(4) 0.008(4) 0.000(3) 0.015(3)
 C38 0.062(3) 0.038(2) 0.055(3) -0.001(2) -0.007(3) 0.000(2)
 C39 0.061(3) 0.045(3) 0.059(3) 0.002(3) -0.009(3) 0.003(2)
 C40 0.072(4) 0.066(4) 0.061(4) 0.002(3) -0.003(3) 0.022(3)

_geom_special_details
;
 All esds (except the esd in the dihedral angle between two l.s. planes)
 are estimated using the full covariance matrix.  The cell esds are taken
 into account individually in the estimation of esds in distances, angles
 and torsion angles; correlations between esds in cell parameters are only
 used when they are defined by crystal symmetry.  An approximate (isotropic)
 treatment of cell esds is used for estimating esds involving l.s. planes.
;
loop_
  _geom_bond_atom_site_label_1
  _geom_bond_atom_site_label_2
  _geom_bond_distance
  _geom_bond_site_symmetry_2
  _geom_bond_publ_flag
 N1 N2 1.184(7) . ?
 N1 C1 1.257(7) . ?
 N3 C2 1.409(7) . ?
 N3 C10 1.447(6) . ?
 N3 C22 1.351(6) . ?
 N4 C3 1.388(7) . ?
 N4 C22 1.334(6) . ?
 N4 C29 1.458(6) . ?
 C1 C2 1.391(8) . ?
 C2 C3 1.413(7) . ?
 C3 C4 1.470(7) . ?
 C4 C5 1.398(8) . ?
 C4 C9 1.404(8) . ?
 C5 H5 0.9500 . ?
 C5 C6 1.401(8) . ?
 C6 H6 0.9500 . ?
 C6 C7 1.369(9) . ?
 C7 H7 0.9500 . ?
 C7 C8 1.398(9) . ?
 C8 H8 0.9500 . ?
 C8 C9 1.375(8) . ?
 C9 H9 0.9500 . ?
 C10 C11 1.376(8) . ?
 C10 C15 1.417(7) . ?
 C11 C12 1.404(8) . ?
 C11 C19 1.533(8) . ?
 C12 H12 0.9500 . ?
 C12 C13 1.363(9) . ?
 C13 H13 0.9500 . ?
 C13 C14 1.385(9) . ?
 C14 H14 0.9500 . ?
 C14 C15 1.386(8) . ?
 C15 C16 1.522(8) . ?
 C16 H16 1.0000 . ?
 C16 C17 1.549(9) . ?
 C16 C18 1.523(8) . ?
 C17 H17A 0.9800 . ?
 C17 H17B 0.9800 . ?
 C17 H17C 0.9800 . ?
 C18 H18A 0.9800 . ?
 C18 H18B 0.9800 . ?
 C18 H18C 0.9800 . ?
 C19 H19 1.0000 . ?
 C19 C20 1.525(8) . ?
 C19 C21 1.508(8) . ?
 C20 H20A 0.9800 . ?
 C20 H20B 0.9800 . ?
 C20 H20C 0.9800 . ?
 C21 H21A 0.9800 . ?
 C21 H21B 0.9800 . ?
 C21 H21C 0.9800 . ?
 C22 C23 1.454(7) . ?
 C23 C24 1.399(8) . ?
 C23 C28 1.399(8) . ?
 C24 H24 0.9500 . ?
 C24 C25 1.381(8) . ?
 C25 H25 0.9500 . ?
 C25 C26 1.367(9) . ?
 C26 H26 0.9500 . ?
 C26 C27 1.383(10) . ?
 C27 H27 0.9500 . ?
 C27 C28 1.376(9) . ?
 C28 H28 0.9500 . ?
 C29 C30 1.394(7) . ?
 C29 C34 1.405(8) . ?
 C30 C31 1.388(8) . ?
 C30 C38 1.526(8) . ?
 C31 H31 0.9500 . ?
 C31 C32 1.382(9) . ?
 C32 H32 0.9500 . ?
 C32 C33 1.387(9) . ?
 C33 H33 0.9500 . ?
 C33 C34 1.405(8) . ?
 C34 C35 1.506(8) . ?
 C35 H35 1.0000 . ?
 C35 C36 1.532(9) . ?
 C35 C37 1.508(9) . ?
 C36 H36A 0.9800 . ?
 C36 H36B 0.9800 . ?
 C36 H36C 0.9800 . ?
 C37 H37A 0.9800 . ?
 C37 H37B 0.9800 . ?
 C37 H37C 0.9800 . ?
 C38 H38 1.0000 . ?
 C38 C39 1.540(8) . ?
 C38 C40 1.535(10) . ?
 C39 H39A 0.9800 . ?
 C39 H39B 0.9800 . ?
 C39 H39C 0.9800 . ?
 C40 H40A 0.9800 . ?
 C40 H40B 0.9800 . ?
 C40 H40C 0.9800 . ?

loop_
  _geom_angle_atom_site_label_1
  _geom_angle_atom_site_label_2
  _geom_angle_atom_site_label_3
  _geom_angle
  _geom_angle_site_symmetry_1
  _geom_angle_site_symmetry_3
  _geom_angle_publ_flag
 N2 N1 C1 169.2(5) . . ?
 C2 N3 C10 123.5(4) . . ?
 C22 N3 C2 110.8(4) . . ?
 C22 N3 C10 125.7(4) . . ?
 C3 N4 C29 126.3(4) . . ?
 C22 N4 C3 111.5(4) . . ?
 C22 N4 C29 122.0(4) . . ?
 N1 C1 C2 124.3(5) . . ?
 N3 C2 C3 104.6(4) . . ?
 C1 C2 N3 126.5(5) . . ?
 C1 C2 C3 128.9(5) . . ?
 N4 C3 C2 106.1(4) . . ?
 N4 C3 C4 126.5(4) . . ?
 C2 C3 C4 127.3(5) . . ?
 C5 C4 C3 123.9(5) . . ?
 C5 C4 C9 117.3(5) . . ?
 C9 C4 C3 118.8(5) . . ?
 C4 C5 H5 119.8 . . ?
 C4 C5 C6 120.3(5) . . ?
 C6 C5 H5 119.8 . . ?
 C5 C6 H6 119.3 . . ?
 C7 C6 C5 121.4(6) . . ?
 C7 C6 H6 119.3 . . ?
 C6 C7 H7 120.5 . . ?
 C6 C7 C8 119.0(5) . . ?
 C8 C7 H7 120.5 . . ?
 C7 C8 H8 120.0 . . ?
 C9 C8 C7 120.1(5) . . ?
 C9 C8 H8 120.0 . . ?
 C4 C9 H9 119.0 . . ?
 C8 C9 C4 122.0(5) . . ?
 C8 C9 H9 119.0 . . ?
 C11 C10 N3 118.5(4) . . ?
 C11 C10 C15 123.4(5) . . ?
 C15 C10 N3 118.1(5) . . ?
 C10 C11 C12 117.2(5) . . ?
 C10 C11 C19 123.8(5) . . ?
 C12 C11 C19 118.9(5) . . ?
 C11 C12 H12 119.4 . . ?
 C13 C12 C11 121.2(5) . . ?
 C13 C12 H12 119.4 . . ?
 C12 C13 H13 119.8 . . ?
 C12 C13 C14 120.4(5) . . ?
 C14 C13 H13 119.8 . . ?
 C13 C14 H14 119.3 . . ?
 C13 C14 C15 121.5(5) . . ?
 C15 C14 H14 119.3 . . ?
 C10 C15 C16 123.4(5) . . ?
 C14 C15 C10 116.3(5) . . ?
 C14 C15 C16 120.2(5) . . ?
 C15 C16 H16 108.2 . . ?
 C15 C16 C17 111.8(5) . . ?
 C15 C16 C18 111.1(5) . . ?
 C17 C16 H16 108.2 . . ?
 C18 C16 H16 108.2 . . ?
 C18 C16 C17 109.1(5) . . ?
 C16 C17 H17A 109.5 . . ?
 C16 C17 H17B 109.5 . . ?
 C16 C17 H17C 109.5 . . ?
 H17A C17 H17B 109.5 . . ?
 H17A C17 H17C 109.5 . . ?
 H17B C17 H17C 109.5 . . ?
 C16 C18 H18A 109.5 . . ?
 C16 C18 H18B 109.5 . . ?
 C16 C18 H18C 109.5 . . ?
 H18A C18 H18B 109.5 . . ?
 H18A C18 H18C 109.5 . . ?
 H18B C18 H18C 109.5 . . ?
 C11 C19 H19 107.5 . . ?
 C20 C19 C11 111.3(5) . . ?
 C20 C19 H19 107.5 . . ?
 C21 C19 C11 111.3(5) . . ?
 C21 C19 H19 107.5 . . ?
 C21 C19 C20 111.4(5) . . ?
 C19 C20 H20A 109.5 . . ?
 C19 C20 H20B 109.5 . . ?
 C19 C20 H20C 109.5 . . ?
 H20A C20 H20B 109.5 . . ?
 H20A C20 H20C 109.5 . . ?
 H20B C20 H20C 109.5 . . ?
 C19 C21 H21A 109.5 . . ?
 C19 C21 H21B 109.5 . . ?
 C19 C21 H21C 109.5 . . ?
 H21A C21 H21B 109.5 . . ?
 H21A C21 H21C 109.5 . . ?
 H21B C21 H21C 109.5 . . ?
 N3 C22 C23 126.1(4) . . ?
 N4 C22 N3 106.8(4) . . ?
 N4 C22 C23 127.2(4) . . ?
 C24 C23 C22 122.3(5) . . ?
 C28 C23 C22 120.2(5) . . ?
 C28 C23 C24 117.5(5) . . ?
 C23 C24 H24 119.5 . . ?
 C25 C24 C23 121.0(5) . . ?
 C25 C24 H24 119.5 . . ?
 C24 C25 H25 119.8 . . ?
 C26 C25 C24 120.4(5) . . ?
 C26 C25 H25 119.8 . . ?
 C25 C26 H26 120.0 . . ?
 C25 C26 C27 120.0(5) . . ?
 C27 C26 H26 120.0 . . ?
 C26 C27 H27 120.0 . . ?
 C28 C27 C26 120.1(6) . . ?
 C28 C27 H27 120.0 . . ?
 C23 C28 H28 119.4 . . ?
 C27 C28 C23 121.1(5) . . ?
 C27 C28 H28 119.4 . . ?
 C30 C29 N4 119.4(4) . . ?
 C30 C29 C34 124.1(5) . . ?
 C34 C29 N4 116.5(4) . . ?
 C29 C30 C38 122.8(4) . . ?
 C31 C30 C29 117.8(5) . . ?
 C31 C30 C38 119.4(5) . . ?
 C30 C31 H31 119.9 . . ?
 C32 C31 C30 120.2(5) . . ?
 C32 C31 H31 119.9 . . ?
 C31 C32 H32 119.5 . . ?
 C31 C32 C33 120.9(5) . . ?
 C33 C32 H32 119.5 . . ?
 C32 C33 H33 119.3 . . ?
 C32 C33 C34 121.5(5) . . ?
 C34 C33 H33 119.3 . . ?
 C29 C34 C35 123.2(5) . . ?
 C33 C34 C29 115.5(5) . . ?
 C33 C34 C35 121.3(5) . . ?
 C34 C35 H35 107.5 . . ?
 C34 C35 C36 110.9(4) . . ?
 C34 C35 C37 112.8(5) . . ?
 C36 C35 H35 107.5 . . ?
 C37 C35 H35 107.5 . . ?
 C37 C35 C36 110.5(5) . . ?
 C35 C36 H36A 109.5 . . ?
 C35 C36 H36B 109.5 . . ?
 C35 C36 H36C 109.5 . . ?
 H36A C36 H36B 109.5 . . ?
 H36A C36 H36C 109.5 . . ?
 H36B C36 H36C 109.5 . . ?
 C35 C37 H37A 109.5 . . ?
 C35 C37 H37B 109.5 . . ?
 C35 C37 H37C 109.5 . . ?
 H37A C37 H37B 109.5 . . ?
 H37A C37 H37C 109.5 . . ?
 H37B C37 H37C 109.5 . . ?
 C30 C38 H38 108.5 . . ?
 C30 C38 C39 110.8(5) . . ?
 C30 C38 C40 112.3(5) . . ?
 C39 C38 H38 108.5 . . ?
 C40 C38 H38 108.5 . . ?
 C40 C38 C39 108.1(5) . . ?
 C38 C39 H39A 109.5 . . ?
 C38 C39 H39B 109.5 . . ?
 C38 C39 H39C 109.5 . . ?
 H39A C39 H39B 109.5 . . ?
 H39A C39 H39C 109.5 . . ?
 H39B C39 H39C 109.5 . . ?
 C38 C40 H40A 109.5 . . ?
 C38 C40 H40B 109.5 . . ?
 C38 C40 H40C 109.5 . . ?
 H40A C40 H40B 109.5 . . ?
 H40A C40 H40C 109.5 . . ?
 H40B C40 H40C 109.5 . . ?

loop_
  _geom_torsion_atom_site_label_1
  _geom_torsion_atom_site_label_2
  _geom_torsion_atom_site_label_3
  _geom_torsion_atom_site_label_4
  _geom_torsion
  _geom_torsion_site_symmetry_1
  _geom_torsion_site_symmetry_2
  _geom_torsion_site_symmetry_3
  _geom_torsion_site_symmetry_4
  _geom_torsion_publ_flag
 N1 C1 C2 N3 -13.0(9) . . . . ?
 N1 C1 C2 C3 166.6(5) . . . . ?
 N2 N1 C1 C2 -175(3) . . . . ?
 N3 C2 C3 N4 2.6(5) . . . . ?
 N3 C2 C3 C4 -178.9(5) . . . . ?
 N3 C10 C11 C12 -178.6(4) . . . . ?
 N3 C10 C11 C19 -1.8(7) . . . . ?
 N3 C10 C15 C14 178.2(4) . . . . ?
 N3 C10 C15 C16 0.7(7) . . . . ?
 N3 C22 C23 C24 -43.1(8) . . . . ?
 N3 C22 C23 C28 134.6(6) . . . . ?
 N4 C3 C4 C5 -27.8(8) . . . . ?
 N4 C3 C4 C9 152.9(5) . . . . ?
 N4 C22 C23 C24 137.6(6) . . . . ?
 N4 C22 C23 C28 -44.7(8) . . . . ?
 N4 C29 C30 C31 180.0(5) . . . . ?
 N4 C29 C30 C38 -0.2(7) . . . . ?
 N4 C29 C34 C33 -179.9(5) . . . . ?
 N4 C29 C34 C35 -2.3(7) . . . . ?
 C1 C2 C3 N4 -177.1(5) . . . . ?
 C1 C2 C3 C4 1.4(9) . . . . ?
 C2 N3 C10 C11 99.2(6) . . . . ?
 C2 N3 C10 C15 -80.9(6) . . . . ?
 C2 N3 C22 N4 2.9(6) . . . . ?
 C2 N3 C22 C23 -176.6(5) . . . . ?
 C2 C3 C4 C5 154.0(5) . . . . ?
 C2 C3 C4 C9 -25.3(8) . . . . ?
 C3 N4 C22 N3 -1.1(6) . . . . ?
 C3 N4 C22 C23 178.3(5) . . . . ?
 C3 N4 C29 C30 -77.0(6) . . . . ?
 C3 N4 C29 C34 103.2(6) . . . . ?
 C3 C4 C5 C6 178.7(5) . . . . ?
 C3 C4 C9 C8 -179.0(5) . . . . ?
 C4 C5 C6 C7 0.9(9) . . . . ?
 C5 C4 C9 C8 1.6(8) . . . . ?
 C5 C6 C7 C8 0.6(9) . . . . ?
 C6 C7 C8 C9 -0.9(9) . . . . ?
 C7 C8 C9 C4 -0.3(8) . . . . ?
 C9 C4 C5 C6 -1.9(8) . . . . ?
 C10 N3 C2 C1 -1.3(8) . . . . ?
 C10 N3 C2 C3 179.0(5) . . . . ?
 C10 N3 C22 N4 -179.6(5) . . . . ?
 C10 N3 C22 C23 0.9(8) . . . . ?
 C10 C11 C12 C13 0.0(8) . . . . ?
 C10 C11 C19 C20 120.5(6) . . . . ?
 C10 C11 C19 C21 -114.6(6) . . . . ?
 C10 C15 C16 C17 -124.0(5) . . . . ?
 C10 C15 C16 C18 113.9(5) . . . . ?
 C11 C10 C15 C14 -2.0(7) . . . . ?
 C11 C10 C15 C16 -179.4(5) . . . . ?
 C11 C12 C13 C14 -1.1(8) . . . . ?
 C12 C11 C19 C20 -62.8(6) . . . . ?
 C12 C11 C19 C21 62.2(6) . . . . ?
 C12 C13 C14 C15 0.6(8) . . . . ?
 C13 C14 C15 C10 0.9(7) . . . . ?
 C13 C14 C15 C16 178.4(5) . . . . ?
 C14 C15 C16 C17 58.7(6) . . . . ?
 C14 C15 C16 C18 -63.5(7) . . . . ?
 C15 C10 C11 C12 1.5(7) . . . . ?
 C15 C10 C11 C19 178.4(5) . . . . ?
 C19 C11 C12 C13 -177.0(5) . . . . ?
 C22 N3 C2 C1 176.3(5) . . . . ?
 C22 N3 C2 C3 -3.4(5) . . . . ?
 C22 N3 C10 C11 -78.0(6) . . . . ?
 C22 N3 C10 C15 101.9(6) . . . . ?
 C22 N4 C3 C2 -1.0(6) . . . . ?
 C22 N4 C3 C4 -179.5(5) . . . . ?
 C22 N4 C29 C30 108.3(6) . . . . ?
 C22 N4 C29 C34 -71.5(6) . . . . ?
 C22 C23 C24 C25 178.3(5) . . . . ?
 C22 C23 C28 C27 -179.0(6) . . . . ?
 C23 C24 C25 C26 -0.6(9) . . . . ?
 C24 C23 C28 C27 -1.3(9) . . . . ?
 C24 C25 C26 C27 1.3(11) . . . . ?
 C25 C26 C27 C28 -1.9(12) . . . . ?
 C26 C27 C28 C23 2.0(12) . . . . ?
 C28 C23 C24 C25 0.6(8) . . . . ?
 C29 N4 C3 C2 -176.2(5) . . . . ?
 C29 N4 C3 C4 5.3(8) . . . . ?
 C29 N4 C22 N3 174.3(4) . . . . ?
 C29 N4 C22 C23 -6.3(8) . . . . ?
 C29 C30 C31 C32 -0.6(7) . . . . ?
 C29 C30 C38 C39 116.1(5) . . . . ?
 C29 C30 C38 C40 -122.9(6) . . . . ?
 C29 C34 C35 C36 -101.4(6) . . . . ?
 C29 C34 C35 C37 134.1(6) . . . . ?
 C30 C29 C34 C33 0.3(7) . . . . ?
 C30 C29 C34 C35 177.9(5) . . . . ?
 C30 C31 C32 C33 1.3(8) . . . . ?
 C31 C30 C38 C39 -64.2(6) . . . . ?
 C31 C30 C38 C40 56.8(7) . . . . ?
 C31 C32 C33 C34 -1.2(9) . . . . ?
 C32 C33 C34 C29 0.5(8) . . . . ?
 C32 C33 C34 C35 -177.2(5) . . . . ?
 C33 C34 C35 C36 76.1(7) . . . . ?
 C33 C34 C35 C37 -48.5(7) . . . . ?
 C34 C29 C30 C31 -0.2(7) . . . . ?
 C34 C29 C30 C38 179.6(5) . . . . ?
 C38 C30 C31 C32 179.7(5) . . . . ?

_shelx_res_file
;
TITL 0923_aba2_a.res in Aba2
    0923_aba2.res
    created by SHELXL-2018/3 at 10:16:50 on 13-Jan-2020
REM Old TITL 0923_Aba2 in Aba2
REM SHELXT solution in Aba2
REM R1 0.128, Rweak 0.008, Alpha 0.003, Orientation as input
REM Flack x = -4.907 ( 4.324 ) from Parsons' quotients
REM Formula found by SHELXT: N2 N3
CELL 0.71073 20.4149 22.3132 14.8781 90 90 90
ZERR 8 0.0038 0.0035 0.0035 0 0 0
LATT -5
SYMM -X,-Y,+Z
SYMM 0.5+X,0.5-Y,+Z
SYMM 0.5-X,0.5+Y,+Z
SFAC C H N
UNIT 320 352 32

L.S. 4 0 0
PLAN  10
TEMP -173.15
CONF
BOND $H
list 4
MORE -1
fmap 2 53
acta
TWIN -1 0 0 0 -1 0 0 0 -1 2
OMIT 1 6 0
REM <olex2.extras>
REM <HklSrc "%.\\0923_Aba2.hkl">
REM </olex2.extras>

WGHT    0.162300    2.359700
EXTI    0.005564
FVAR       0.08647
N1    3    0.218625    0.187091    0.423739    11.00000    0.04667    0.04404 =
         0.05225    0.00737    0.00333   -0.00124
N2    3    0.217678    0.141598    0.382747    11.00000    0.05643    0.04417 =
         0.06581   -0.00672   -0.00173   -0.00342
N3    3    0.324371    0.268039    0.482815    11.00000    0.04535    0.03244 =
         0.04294    0.00111   -0.00010   -0.00080
N4    3    0.310961    0.358503    0.530307    11.00000    0.04260    0.03653 =
         0.04626    0.00227   -0.00063    0.00150
C1    1    0.208159    0.234080    0.468103    11.00000    0.04465    0.03773 =
         0.05878    0.00215    0.00341   -0.00103
C2    1    0.256088    0.275852    0.490165    11.00000    0.04462    0.04269 =
         0.04072    0.00419   -0.00034    0.00374
C3    1    0.248361    0.334644    0.523792    11.00000    0.04223    0.04121 =
         0.04301    0.00325   -0.00024   -0.00186
C4    1    0.186661    0.365390    0.545408    11.00000    0.04609    0.04186 =
         0.04298    0.00374    0.00084    0.00025
C5    1    0.181323    0.411665    0.608374    11.00000    0.04650    0.04912 =
         0.05038    0.00276    0.00046    0.00164
AFIX  43
H5    2    0.218916    0.424325    0.640867    11.00000   -1.20000
AFIX   0
C6    1    0.120819    0.439447    0.623776    11.00000    0.05486    0.05205 =
         0.05690   -0.00451    0.00105    0.00863
AFIX  43
H6    2    0.118117    0.471184    0.666177    11.00000   -1.20000
AFIX   0
C7    1    0.065522    0.421810    0.579000    11.00000    0.04565    0.05909 =
         0.06496    0.00251    0.00410    0.00735
AFIX  43
H7    2    0.024867    0.441266    0.589668    11.00000   -1.20000
AFIX   0
C8    1    0.069807    0.374726    0.517336    11.00000    0.04369    0.05497 =
         0.05664    0.00584   -0.00436    0.00126
AFIX  43
H8    2    0.031739    0.361599    0.486337    11.00000   -1.20000
AFIX   0
C9    1    0.129061    0.347366    0.501465    11.00000    0.04865    0.04644 =
         0.05098    0.00563    0.00124   -0.00203
AFIX  43
H9    2    0.131081    0.315317    0.459522    11.00000   -1.20000
AFIX   0
C10   1    0.354598    0.213104    0.451902    11.00000    0.03728    0.03558 =
         0.05125    0.00077   -0.00047   -0.00045
C11   1    0.375016    0.209810    0.363905    11.00000    0.04262    0.04184 =
         0.04939   -0.00079   -0.00182   -0.00431
C12   1    0.402810    0.155515    0.335314    11.00000    0.04400    0.04502 =
         0.06038   -0.01094    0.00164    0.00080
AFIX  43
H12   2    0.417463    0.151704    0.274980    11.00000   -1.20000
AFIX   0
C13   1    0.409160    0.108151    0.392548    11.00000    0.04756    0.03952 =
         0.07204   -0.00945   -0.00001   -0.00024
AFIX  43
H13   2    0.427423    0.071588    0.371520    11.00000   -1.20000
AFIX   0
C14   1    0.389127    0.113058    0.481176    11.00000    0.05436    0.03568 =
         0.05722    0.00323   -0.00065   -0.00212
AFIX  43
H14   2    0.394284    0.079737    0.520289    11.00000   -1.20000
AFIX   0
C15   1    0.361732    0.165465    0.514100    11.00000    0.04073    0.03548 =
         0.05079    0.00299   -0.00327   -0.00313
C16   1    0.338576    0.168919    0.611171    11.00000    0.05789    0.04055 =
         0.05004    0.00506    0.00284   -0.00594
AFIX  13
H16   2    0.322135    0.210441    0.622613    11.00000   -1.20000
AFIX   0
C17   1    0.394840    0.155911    0.678250    11.00000    0.06801    0.08240 =
         0.06046    0.01335   -0.01101   -0.01719
AFIX 137
H17A  2    0.409561    0.114390    0.670971    11.00000   -1.50000
H17B  2    0.379095    0.161925    0.739818    11.00000   -1.50000
H17C  2    0.431458    0.183189    0.666399    11.00000   -1.50000
AFIX   0
C18   1    0.282656    0.125230    0.628412    11.00000    0.05715    0.05208 =
         0.05742    0.00282    0.00454   -0.00975
AFIX 137
H18A  2    0.245156    0.135890    0.590525    11.00000   -1.50000
H18B  2    0.269808    0.127247    0.691805    11.00000   -1.50000
H18C  2    0.297022    0.084439    0.614000    11.00000   -1.50000
AFIX   0
C19   1    0.365968    0.260453    0.295391    11.00000    0.05691    0.04242 =
         0.04420   -0.00042    0.00460   -0.00154
AFIX  13
H19   2    0.345509    0.295061    0.327572    11.00000   -1.20000
AFIX   0
C20   1    0.431619    0.281659    0.258205    11.00000    0.06333    0.06316 =
         0.05545    0.00284    0.00617   -0.00838
AFIX 137
H20A  2    0.460129    0.293776    0.307985    11.00000   -1.50000
H20B  2    0.424548    0.315867    0.218049    11.00000   -1.50000
H20C  2    0.452362    0.248959    0.224687    11.00000   -1.50000
AFIX   0
C21   1    0.319982    0.242092    0.221012    11.00000    0.07261    0.05923 =
         0.04724    0.00256   -0.00347    0.00178
AFIX 137
H21A  2    0.337696    0.206889    0.190020    11.00000   -1.50000
H21B  2    0.315321    0.275170    0.178154    11.00000   -1.50000
H21C  2    0.277042    0.232285    0.246524    11.00000   -1.50000
AFIX   0
C22   1    0.356375    0.318977    0.504871    11.00000    0.04235    0.03825 =
         0.03902   -0.00125   -0.00012    0.00172
C23   1    0.426778    0.328397    0.500471    11.00000    0.04568    0.03841 =
         0.05049   -0.00641    0.00138   -0.00272
C24   1    0.471713    0.285349    0.529971    11.00000    0.04752    0.04916 =
         0.05028   -0.00344   -0.00207    0.00287
AFIX  43
H24   2    0.456169    0.248963    0.555354    11.00000   -1.20000
AFIX   0
C25   1    0.538348    0.294956    0.522746    11.00000    0.04784    0.04754 =
         0.06924   -0.01080   -0.00298    0.00329
AFIX  43
H25   2    0.568145    0.265373    0.543649    11.00000   -1.20000
AFIX   0
C26   1    0.561638    0.346788    0.485687    11.00000    0.03783    0.04923 =
         0.11182   -0.01570    0.00422   -0.00351
AFIX  43
H26   2    0.607502    0.352823    0.479784    11.00000   -1.20000
AFIX   0
C27   1    0.518425    0.390449    0.456786    11.00000    0.05701    0.04199 =
         0.12436   -0.00168    0.01673   -0.00844
AFIX  43
H27   2    0.534644    0.426992    0.432739    11.00000   -1.20000
AFIX   0
C28   1    0.451949    0.381024    0.462817    11.00000    0.04773    0.04033 =
         0.09075    0.00520    0.00937    0.00788
AFIX  43
H28   2    0.422664    0.410757    0.441045    11.00000   -1.20000
AFIX   0
C29   1    0.328163    0.417063    0.566772    11.00000    0.04161    0.03486 =
         0.05019   -0.00335   -0.00268    0.00140
C30   1    0.317526    0.468210    0.514992    11.00000    0.04668    0.03704 =
         0.05208   -0.00211    0.00072    0.00348
C31   1    0.334476    0.523207    0.551814    11.00000    0.05786    0.03730 =
         0.05929   -0.00146   -0.00131    0.00097
AFIX  43
H31   2    0.328209    0.558882    0.518041    11.00000   -1.20000
AFIX   0
C32   1    0.360451    0.526228    0.637490    11.00000    0.05738    0.04568 =
         0.06512   -0.01181    0.00283   -0.00917
AFIX  43
H32   2    0.371068    0.564164    0.662550    11.00000   -1.20000
AFIX   0
C33   1    0.371236    0.474659    0.687390    11.00000    0.04877    0.05355 =
         0.05317   -0.01566   -0.00468   -0.00162
AFIX  43
H33   2    0.389937    0.477908    0.745656    11.00000   -1.20000
AFIX   0
C34   1    0.355119    0.417742    0.653684    11.00000    0.04486    0.04811 =
         0.04693   -0.00409    0.00308    0.00205
C35   1    0.364065    0.362106    0.709674    11.00000    0.05937    0.04939 =
         0.04774   -0.00182   -0.00307    0.01065
AFIX  13
H35   2    0.360017    0.326840    0.668571    11.00000   -1.20000
AFIX   0
C36   1    0.309910    0.356820    0.780477    11.00000    0.06402    0.06105 =
         0.06041    0.01766    0.00175    0.00179
AFIX 137
H36A  2    0.309992    0.392666    0.818537    11.00000   -1.50000
H36B  2    0.317729    0.321298    0.817697    11.00000   -1.50000
H36C  2    0.267358    0.353115    0.750499    11.00000   -1.50000
AFIX   0
C37   1    0.430627    0.358887    0.753310    11.00000    0.06177    0.09115 =
         0.06707    0.00804    0.00015    0.01525
AFIX 137
H37A  2    0.464637    0.364097    0.707486    11.00000   -1.50000
H37B  2    0.436000    0.319784    0.782380    11.00000   -1.50000
H37C  2    0.434509    0.390690    0.798427    11.00000   -1.50000
AFIX   0
C38   1    0.288580    0.465859    0.420477    11.00000    0.06168    0.03828 =
         0.05505   -0.00055   -0.00651    0.00033
AFIX  13
H38   2    0.281808    0.422923    0.403603    11.00000   -1.20000
AFIX   0
C39   1    0.221912    0.498125    0.417236    11.00000    0.06094    0.04517 =
         0.05877    0.00217   -0.00906    0.00312
AFIX 137
H39A  2    0.190017    0.475903    0.453467    11.00000   -1.50000
H39B  2    0.206624    0.500224    0.354876    11.00000   -1.50000
H39C  2    0.226682    0.538775    0.441303    11.00000   -1.50000
AFIX   0
C40   1    0.333697    0.494962    0.350424    11.00000    0.07243    0.06642 =
         0.06116    0.00221   -0.00280    0.02160
AFIX 137
H40A  2    0.339777    0.537412    0.365124    11.00000   -1.50000
H40B  2    0.313853    0.491392    0.290687    11.00000   -1.50000
H40C  2    0.376266    0.474663    0.350738    11.00000   -1.50000
AFIX   0
HKLF 4


REM  0923_aba2_a.res in Aba2
REM wR2 = 0.227265, GooF = S = 1.10133, Restrained GooF = 1.10123 for all data
REM R1 = 0.071395 for 5211 Fo > 4sig(Fo) and 0.081928 for all 6046 data
REM 406 parameters refined using 1 restraints

END

WGHT      0.1624      2.3600

REM Highest difference peak  0.313,  deepest hole -0.271,  1-sigma level  0.069
Q1    1   0.1959  0.3604  0.7718  11.00000  0.05    0.29
Q2    1   0.3143  0.2975  0.8198  11.00000  0.05    0.24
Q3    1   0.2989  0.3595  0.7123  11.00000  0.05    0.24
Q4    1   0.3374  0.1187  0.4746  11.00000  0.05    0.23
Q5    1   0.2958  0.5322  0.6287  11.00000  0.05    0.23
Q6    1   0.3006  0.1612  0.5026  11.00000  0.05    0.22
Q7    1   0.3230  0.4057  0.8478  11.00000  0.05    0.21
Q8    1   0.3540  0.1133  0.3786  11.00000  0.05    0.21
Q9    1   0.3212  0.2432  0.7802  11.00000  0.05    0.21
Q10   1   0.1531  0.2006  0.4153  11.00000  0.05    0.20
;
_shelx_res_checksum                39050
_shelx_hkl_file
;
   0   0  -4  523.71   40.12
   0   0  -4  491.44   40.13
   0   0   4  488.60   40.13
   0   0  -4  522.34   40.11
   0   0  -4  540.74   40.10
   0   0   4  515.12   40.10
   0   0  -4  504.03   40.12
   0   0   4  489.11   40.12
   0   0   4  516.60   40.11
   0   0   4  492.99   40.12
   0   0   4  502.26   40.13
   0   0  -4  493.80   40.13
   0   0  -4  514.86   40.13
   0   0  -6  191.27   15.86
   0   0  -6  199.86   15.88
   0   0   6  201.29   15.88
   0   0   6  202.94   15.85
   0   0  -6  193.02   15.86
   0   0  -6  208.26   15.82
   0   0   6  203.80   15.81
   0   0   6  185.56   15.87
   0   0   6  204.77   15.86
   0   0  -6  205.40   15.82
   0   0   6  212.63   15.82
   0   0   6  194.98   15.83
   0   0  -6  192.08   15.85
   0   0  -8  132.54   10.86
   0   0   8  132.03   10.82
   0   0  -8  138.32   10.83
   0   0   8  137.01   10.85
   0   0  -8  135.99   10.90
   0   0   8  139.14   10.85
   0   0  -8  142.59   10.89
   0   0   8  137.52   10.87
   0   0   8  135.09   10.86
   0   0  -8  137.12   10.87
   0   0   8  138.42   10.83
   0   0  -8  134.70   10.87
   0   0   8  133.13   10.88
   0   0  10   18.20    1.60
   0   0  10   14.71    1.68
   0   0  10   18.07    1.82
   0   0  10   20.26    1.61
   0   0 -10   18.56    1.57
   0   0 -10   17.95    1.75
   0   0  10   17.91    1.60
   0   0 -10   19.19    1.64
   0   0 -12    9.92    1.16
   0   0 -12    9.01    1.05
   0   0  12    8.16    0.97
   0   0  12    9.94    1.00
   0   0  12    9.31    1.15
   0   0  12    8.37    1.00
   0   0  14    2.54    0.52
   0   0  14    2.04    0.50
   0   0 -14    2.90    0.62
   0   0  16    0.92    0.55
   0   0 -16    0.26    0.71
   0   0  16    0.62    0.41
   0   0  16   -0.03    0.40
   0   0 -16    0.21    0.48
   0   1  -3    0.11    0.16
   0   1   3   -0.18    0.24
   0   1   3    0.24    0.19
   0   1  -3    0.42    0.27
   0   1  -3    0.34    0.22
   0   1  -3    0.25    0.16
   0   1  -3    0.08    0.18
   0   1  -3   -0.09    0.15
   0   1   3    0.45    0.21
   0   1   3    0.38    0.16
   0   1   3    0.47    0.23
   0   1   3    0.25    0.22
   0   1  -3   -0.04    0.16
   0  -1   3    0.47    0.16
   0  -1   3    0.37    0.26
   0  -1  -3   -0.11    0.21
   0  -1  -3    0.35    0.24
   0  -1   3    0.00    0.17
   0  -1   3    0.15    0.16
   0  -1   3   -0.14    0.24
   0  -1  -3    0.16    0.16
   0  -1   3    0.56    0.17
   0  -1   3   -0.19    0.14
   0  -1  -3    0.56    0.24
   0  -1  -3    0.19    0.15
   0  -1   3    0.36    0.21
   0   1  -5    0.47    0.18
   0   1   5   -0.05    0.16
   0   1   5   -0.04    0.20
   0   1  -5    0.22    0.25
   0   1  -5    0.46    0.20
   0   1  -5    0.14    0.30
   0   1  -5    0.39    0.19
   0   1   5   -0.17    0.25
   0   1   5   -0.15    0.25
   0   1   5    0.24    0.23
   0   1   5    0.17    0.26
   0   1   5   -0.09    0.23
   0   1   5    0.10    0.29
   0  -1   5    0.42    0.23
   0  -1   5    0.24    0.20
   0  -1  -5    0.69    0.33
   0  -1  -5   -0.18    0.26
   0  -1   5    0.54    0.29
   0  -1   5    0.27    0.16
   0  -1   5    1.05    0.52
   0  -1  -5    0.27    0.23
   0  -1   5    0.39    0.27
   0  -1  -5    0.32    0.23
   0  -1  -5    0.09    0.18
   0  -1   5    0.26    0.20
   0  -1  -5   -0.13    0.25
   0  -1  -5    0.10    0.17
   0  -1   5    0.44    0.21
   0   1  -7   -0.65    0.21
   0   1   7    0.52    0.31
   0   1   7    0.54    0.36
   0   1  -7    0.65    0.41
   0   1  -7    0.11    0.35
   0   1   7    0.29    0.28
   0   1  -7    0.15    0.22
   0   1  -7    0.75    0.36
   0   1   7    1.09    0.35
   0   1  -7    0.21    0.24
   0   1   7    0.05    0.22
   0   1   7    0.30    0.29
   0  -1  -7    0.24    0.39
   0  -1  -7    0.65    0.28
   0  -1   7    0.48    0.34
   0  -1  -7    0.47    0.43
   0  -1  -7    0.09    0.25
   0  -1  -7    0.09    0.25
   0  -1   7    0.40    0.27
   0  -1  -7    1.12    0.27
   0  -1   7    0.55    0.30
   0  -1  -7    1.08    0.37
   0  -1   7    0.42    0.19
   0  -1   7    0.30    0.26
   0  -1   7    0.10    0.24
   0   1  -9   -0.26    0.33
   0   1   9    0.02    0.25
   0   1   9   -0.41    0.27
   0   1   9    0.29    0.31
   0   1   9   -0.10    0.25
   0   1  -9   -0.07    0.21
   0   1   9   -0.10    0.24
   0   1  -9    0.71    0.34
   0   1  -9   -0.08    0.38
   0  -1   9    0.51    0.27
   0  -1  -9    0.06    0.22
   0  -1   9    0.05    0.24
   0  -1  -9    1.09    0.43
   0  -1   9    0.08    0.29
   0  -1  -9    0.39    0.26
   0  -1  -9    0.01    0.35
   0  -1   9    0.10    0.26
   0   1 -11   -0.39    0.44
   0   1  11   -0.15    0.29
   0   1  11    0.23    0.41
   0   1 -11   -0.12    0.35
   0   1  11   -0.09    0.30
   0   1  11    0.15    0.29
   0   1 -11    0.18    0.43
   0  -1  11    0.11    0.29
   0  -1 -11   -0.43    0.36
   0  -1  11   -0.26    0.28
   0  -1  11    0.14    0.37
   0  -1  11    0.30    0.29
   0  -1 -11   -0.17    0.45
   0   1  13   -0.42    0.31
   0   1 -13    0.15    0.47
   0   1  13    0.18    0.39
   0   1 -13   -0.51    0.57
   0   1  13    0.41    0.45
   0   1  13    0.25    0.34
   0  -1 -13   -0.22    0.57
   0  -1  13   -0.09    0.42
   0  -1  13   -0.08    0.34
   0  -1 -13    0.11    0.42
   0  -1  13   -0.14    0.34
   0  -1  13    0.36    0.61
   0   1  15    0.35    0.46
   0   1 -15    0.22    0.46
   0   1 -15    0.19    0.63
   0   1  15    0.11    0.39
   0   1  15   -0.04    0.35
   0   1  15   -0.09    0.34
   0  -1 -15    0.32    0.61
   0  -1 -15   -0.12    0.47
   0  -1  15    0.02    0.35
   0  -1  15   -0.13    0.36
   0  -1  15    0.06    0.35
   0   1  17    0.01    0.42
   0   1 -17   -0.20    0.72
   0   1  17   -0.50    0.48
   0   1 -17   -0.40    0.48
   0   1  17   -0.04    0.42
   0  -1  17   -0.55    0.48
   0  -1 -17   -0.26    0.48
   0  -1 -17    0.26    0.75
   0  -1  17    0.22    0.40
   0   2   2  115.47    9.96
   0   2  -2  139.58    9.95
   0   2   2  108.53    9.96
   0   2   2  117.39    9.97
   0   2  -2  124.54    9.95
   0   2   2  121.46    9.95
   0   2   2  120.88    9.96
   0   2  -2  139.85    9.96
   0   2   2  129.07    9.98
   0   2  -2  126.73    9.96
   0   2   2  129.09    9.95
   0   2   2  125.25    9.97
   0   2   2  124.12    9.97
   0  -2  -2  116.98    9.96
   0  -2   2  125.96    9.96
   0  -2  -2  132.19    9.95
   0  -2  -2  119.97    9.96
   0  -2  -2  122.75    9.95
   0  -2  -2  121.33    9.96
   0  -2   2  130.16    9.95
   0  -2   2  123.33    9.95
   0  -2   2  142.48    9.96
   0  -2  -2  125.29    9.97
   0  -2  -2  125.47    9.96
   0  -2   2  133.86    9.95
   0   2   4  933.50   71.16
   0   2  -4  869.85   71.13
   0   2   4  910.37   71.14
   0   2  -4  921.25   71.12
   0   2   4  809.80   71.13
   0   2   4  772.43   71.17
   0   2  -4  858.08   71.13
   0   2   4  962.70   71.12
   0   2   4  882.81   71.14
   0   2   4  902.26   71.14
   0   2   4  915.08   71.13
   0   2  -4  951.49   71.14
   0  -2  -4  895.50   71.14
   0  -2  -4  815.02   71.22
   0  -2  -4  898.34   71.14
   0  -2  -4  902.62   71.14
   0  -2   4  953.42   71.13
   0  -2   4  905.81   71.12
   0  -2   4  961.31   71.13
   0  -2   4 1000.00   71.14
   0  -2   4  877.23   71.13
   0  -2  -4  873.05   71.17
   0  -2   4  857.94   71.13
   0  -2  -4  956.59   71.12
   0  -2  -4  902.95   71.13
   0  -2   4  867.43   71.11
   0  -2  -4  940.01   71.12
   0   2  -6   82.27    6.29
   0   2  -6   81.98    6.29
   0   2  -6   80.02    6.33
   0   2   6   79.88    6.31
   0   2   6   69.65    6.30
   0   2   6   75.32    6.31
   0   2   6   80.54    6.32
   0   2  -6   81.31    6.31
   0   2  -6   82.22    6.28
   0   2  -6   80.53    6.30
   0   2   6   76.27    6.32
   0  -2   6   80.79    6.29
   0  -2   6   78.09    6.29
   0  -2  -6   77.96    6.28
   0  -2  -6   79.14    6.33
   0  -2  -6   76.36    6.31
   0  -2   6   80.45    6.33
   0  -2   6   82.68    6.31
   0  -2   6   78.21    6.28
   0  -2  -6   78.07    6.35
   0  -2  -6   76.46    6.33
   0  -2   6   80.47    6.31
   0  -2   6   80.49    6.30
   0  -2   6   76.32    6.27
   0  -2  -6   76.39    6.31
   0   2   8   46.67    3.97
   0   2  -8   51.84    4.01
   0   2  -8   50.04    3.96
   0   2   8   48.08    3.97
   0   2  -8   47.36    3.95
   0   2   8   50.22    3.99
   0   2   8   47.97    3.94
   0   2  -8   47.84    3.96
   0   2   8   51.02    3.98
   0   2  -8   52.67    4.03
   0   2  -8   48.77    3.97
   0  -2  -8   49.93    4.04
   0  -2   8   47.07    3.96
   0  -2  -8   53.96    4.04
   0  -2  -8   50.67    3.99
   0  -2  -8   49.27    3.98
   0  -2   8   48.91    3.99
   0  -2  -8   49.88    3.94
   0  -2   8   51.75    3.97
   0  -2   8   48.31    3.95
   0  -2   8   40.37    3.93
   0  -2   8   47.64    3.95
   0   2  10   12.72    1.14
   0   2  10   10.32    1.09
   0   2 -10   10.40    1.03
   0   2  10   12.89    1.11
   0   2  10   11.17    1.21
   0   2 -10   11.41    1.27
   0   2 -10   10.10    1.10
   0   2 -10   10.86    1.22
   0  -2  10    9.02    1.01
   0  -2 -10   13.28    1.16
   0  -2 -10   13.21    1.29
   0  -2  10   10.53    1.17
   0  -2 -10   11.16    1.04
   0  -2  10   10.50    1.05
   0  -2  10   11.54    1.09
   0   2 -12    0.57    0.42
   0   2  12    1.53    0.44
   0   2  12    1.38    0.40
   0   2  12    1.77    0.52
   0   2  12    1.30    0.40
   0   2 -12    1.10    0.58
   0  -2 -12    1.19    0.36
   0  -2 -12    0.99    0.47
   0  -2  12    0.80    0.48
   0  -2  12    1.58    0.42
   0  -2 -12    0.68    0.59
   0  -2  12    1.32    0.37
   0   2  14    2.92    0.60
   0   2  14    5.61    0.77
   0   2  14    4.43    0.74
   0   2  14    4.95    0.68
   0   2 -14    4.33    0.70
   0   2 -14    5.70    0.92
   0  -2  14    3.20    0.57
   0  -2 -14    4.13    0.89
   0  -2  14    3.81    0.62
   0  -2  14    3.90    0.72
   0  -2 -14    4.53    0.74
   0   2  16    0.10    0.43
   0   2  16    0.26    0.43
   0   2  16    1.12    0.55
   0   2 -16    0.60    0.51
   0   2 -16    0.82    0.73
   0   2  16    0.75    0.43
   0  -2  16    0.50    0.39
   0  -2  16    1.04    0.56
   0  -2  16   -0.42    0.38
   0  -2  16   -0.16    0.40
   0  -2 -16    0.50    0.54
   0  -2 -16   -0.01    0.69
   0   3   1    0.01    0.17
   0   3  -1    0.03    0.15
   0   3  -1   -0.20    0.15
   0   3  -1   -0.06    0.15
   0   3   1    0.18    0.16
   0   3  -1   -0.16    0.12
   0   3   1   -0.19    0.19
   0   3   1   -0.03    0.18
   0   3   1   -0.52    0.19
   0   3   1   -0.35    0.17
   0   3  -1   -0.50    0.14
   0   3   1   -0.21    0.15
   0   3  -1   -0.39    0.17
   0   3   1    0.01    0.17
   0   3   1   -0.04    0.16
   0   3  -1   -0.46    0.14
   0   3  -1   -0.24    0.12
   0   3   1    0.05    0.17
   0  -3  -1   -0.42    0.16
   0  -3   1   -0.12    0.14
   0  -3   1   -0.02    0.15
   0  -3   1    0.05    0.15
   0  -3  -1    0.36    0.17
   0  -3   1   -0.28    0.14
   0  -3  -1   -0.59    0.17
   0  -3   1    0.02    0.18
   0  -3  -1   -0.31    0.18
   0  -3  -1   -0.12    0.19
   0  -3  -1   -0.37    0.20
   0  -3  -1    0.14    0.19
   0  -3   1   -0.01    0.15
   0  -3  -1   -0.01    0.18
   0  -3  -1    0.01    0.17
   0  -3   1   -0.01    0.18
   0  -3   1   -0.20    0.13
   0  -3  -1   -0.33    0.13
   0  -3   1   -0.21    0.16
   0  -3   1   -0.27    0.16
   0   3  -3    0.59    0.21
   0   3   3   -0.11    0.29
   0   3   3    0.20    0.26
   0   3   3    0.54    0.26
   0   3   3    0.32    0.27
   0   3   3    0.17    0.21
   0   3   3   -0.26    0.26
   0   3   3   -0.35    0.25
   0   3   3   -0.10    0.19
   0  -3  -3   -0.09    0.27
   0  -3  -3    0.12    0.32
   0  -3  -3   -0.16    0.18
   0  -3  -3    0.03    0.26
   0  -3  -3    0.39    0.26
   0  -3  -3   -0.11    0.24
   0  -3   3   -0.17    0.19
   0  -3  -3   -0.10    0.28
   0   3   5   -0.73    0.24
   0   3  -5   -0.40    0.22
   0   3  -5   -0.16    0.19
   0   3   5   -0.27    0.24
   0   3   5   -0.54    0.30
   0   3  -5   -0.59    0.34
   0   3   5   -0.40    0.25
   0   3   5   -0.33    0.18
   0   3   5   -0.89    0.31
   0   3   5   -0.35    0.22
   0   3   5    0.05    0.26
   0   3  -5   -0.31    0.20
   0  -3  -5   -0.11    0.23
   0  -3  -5   -0.07    0.27
   0  -3  -5   -0.29    0.19
   0  -3   5    0.41    0.23
   0  -3  -5    0.15    0.29
   0  -3  -5   -0.54    0.31
   0  -3  -5   -0.77    0.29
   0  -3   5   -0.16    0.20
   0  -3   5   -0.15    0.30
   0  -3  -5   -0.24    0.19
   0  -3   5   -0.29    0.22
   0  -3   5   -0.13    0.17
   0  -3  -5   -0.80    0.29
   0  -3   5    0.07    0.18
   0   3  -7    1.05    0.50
   0   3  -7    0.75    0.41
   0   3   7    0.50    0.32
   0   3  -7   -0.11    0.26
   0  -3   7    0.74    0.31
   0  -3   7    1.09    0.34
   0  -3  -7    1.02    0.29
   0  -3   7    0.29    0.21
   0  -3   7    0.81    0.23
   0  -3   7    0.43    0.29
   0  -3   7    0.31    0.32
   0   3  -9    0.09    0.22
   0   3  -9    0.38    0.41
   0   3  -9   -0.14    0.23
   0   3  -9    0.06    0.31
   0   3  -9   -0.10    0.19
   0   3   9    0.12    0.27
   0   3   9   -0.05    0.33
   0   3   9   -0.10    0.28
   0   3  -9    0.34    0.33
   0  -3   9    0.03    0.21
   0  -3   9    0.09    0.30
   0  -3   9   -0.29    0.21
   0  -3  -9    0.59    0.47
   0  -3   9   -0.04    0.19
   0  -3  -9    0.46    0.35
   0  -3  -9   -0.32    0.21
   0  -3  -9   -0.16    0.23
   0  -3   9   -0.10    0.25
   0  -3  -9    0.44    0.42
   0  -3   9   -0.16    0.24
   0   3  11   -0.62    0.34
   0   3 -11   -0.79    0.35
   0   3  11   -0.17    0.40
   0   3  11   -0.19    0.39
   0   3 -11   -0.11    0.46
   0   3 -11   -0.04    0.28
   0   3 -11   -0.25    0.45
   0   3  11    0.08    0.35
   0  -3 -11    0.22    0.44
   0  -3  11   -0.41    0.36
   0  -3  11    0.02    0.26
   0  -3 -11   -0.01    0.29
   0  -3 -11   -0.74    0.44
   0  -3  11   -0.16    0.28
   0  -3  11    0.02    0.31
   0   3 -13    0.58    0.43
   0   3  13   -0.14    0.33
   0   3  13    0.12    0.43
   0   3  13   -0.37    0.41
   0   3 -13   -0.32    0.53
   0   3  13    0.91    0.36
   0   3  13   -0.28    0.38
   0  -3 -13   -0.28    0.55
   0  -3  13    0.16    0.43
   0  -3 -13   -0.39    0.45
   0  -3  13   -0.02    0.34
   0  -3 -13    0.13    0.36
   0  -3  13    0.02    0.31
   0   3  15   -0.20    0.38
   0   3 -15    0.56    0.47
   0   3  15    0.03    0.48
   0   3 -15    0.61    0.63
   0   3  15    0.27    0.45
   0  -3  15    0.08    0.43
   0  -3 -15   -0.75    0.60
   0  -3 -15    0.41    0.50
   0  -3  15   -0.30    0.33
   0  -3  15   -0.36    0.52
   0   3  17   -0.48    0.46
   0   3  17    0.05    0.51
   0   3  17   -0.03    0.57
   0   3 -17   -0.17    0.53
   0   3  17   -0.31    0.45
   0  -3  17    0.66    0.44
   0  -3  17   -0.27    0.51
   0  -3 -17   -0.30    0.75
   0  -3 -17    0.69    0.60
   0   4   0  294.50   21.61
   0   4   0  267.88   21.58
   0   4   0  278.23   21.58
   0   4   0  282.37   21.58
   0   4   0  292.08   21.59
   0   4   0  263.13   21.60
   0   4   0  260.67   21.58
   0   4   0  261.29   21.59
   0   4   0  267.41   21.58
   0  -4   0  272.69   21.58
   0  -4   0  270.65   21.59
   0  -4   0  279.78   21.58
   0  -4   0  270.83   21.59
   0  -4   0  282.68   21.59
   0  -4   0  271.26   21.58
   0  -4   0  273.23   21.58
   0  -4   0  269.89   21.59
   0  -4   0  271.93   21.59
   0  -4   0  252.51   21.59
   0   4   2  170.58   13.87
   0   4  -2  179.41   13.88
   0   4   2  162.23   13.88
   0   4   2  169.79   13.89
   0   4  -2  186.42   13.86
   0   4  -2  176.57   13.86
   0   4  -2  185.41   13.86
   0   4   2  166.54   13.88
   0   4   2  172.90   13.88
   0   4   2  149.91   13.87
   0   4   2  173.24   13.87
   0   4   2  171.61   13.89
   0   4  -2  168.95   13.87
   0   4   2  182.57   13.88
   0   4   2  170.07   13.88
   0  -4  -2  165.40   13.87
   0  -4   2  181.09   13.87
   0  -4   2  180.22   13.87
   0  -4  -2  182.79   13.89
   0  -4  -2  170.63   13.88
   0  -4  -2  182.57   13.88
   0  -4  -2  171.61   13.87
   0  -4   2  196.22   13.87
   0  -4   2  175.34   13.89
   0  -4  -2  170.95   13.88
   0  -4   2  179.35   13.88
   0  -4   2  188.85   13.86
   0  -4  -2  172.38   13.88
   0  -4   2  191.17   13.87
   0  -4  -2  168.78   13.87
   0  -4  -2  166.97   13.89
   0  -4  -2  172.03   13.89
   0   4   4   21.98    2.00
   0   4   4   25.28    1.97
   0   4   4   22.95    2.02
   0   4   4   24.82    2.02
   0   4  -4   24.63    1.98
   0   4  -4   23.15    1.97
   0   4   4   21.10    2.00
   0   4   4   22.41    2.03
   0   4  -4   23.84    1.98
   0   4   4   23.96    2.00
   0   4  -4   27.02    1.97
   0   4  -4   27.91    1.99
   0  -4  -4   20.16    2.04
   0  -4  -4   22.71    2.01
   0  -4  -4   23.73    1.96
   0  -4  -4   21.64    2.01
   0  -4  -4   23.53    1.98
   0  -4   4   28.78    2.00
   0  -4  -4   21.41    2.02
   0  -4  -4   23.83    2.03
   0  -4   4   28.12    1.96
   0  -4   4   24.14    1.97
   0  -4  -4   23.73    1.97
   0  -4   4   24.68    1.99
   0   4   6   24.98    2.22
   0   4  -6   20.98    2.18
   0   4  -6   25.98    2.23
   0   4   6   28.01    2.21
   0  -4   6   29.28    2.22
   0  -4  -6   24.87    2.23
   0  -4  -6   26.50    2.18
   0  -4   6   30.46    2.23
   0  -4  -6   27.98    2.26
   0   4  -8   28.49    2.57
   0   4  -8   31.70    2.57
   0   4   8   33.79    2.63
   0   4  -8   28.85    2.57
   0   4  -8   33.69    2.64
   0   4  -8   32.41    2.61
   0   4   8   25.76    2.60
   0   4   8   37.36    2.65
   0   4   8   34.29    2.61
   0  -4   8   27.82    2.56
   0  -4  -8   32.73    2.56
   0  -4  -8   35.00    2.69
   0  -4   8   31.13    2.62
   0  -4   8   30.12    2.58
   0  -4  -8   35.78    2.67
   0  -4   8   27.03    2.55
   0  -4  -8   33.08    2.63
   0  -4  -8   30.45    2.56
   0   4 -10    5.87    0.73
   0   4  10    8.07    0.89
   0   4 -10    8.75    0.95
   0   4 -10    6.19    0.73
   0   4 -10    6.16    0.76
   0   4  10    6.43    0.79
   0   4  10    7.49    0.81
   0   4 -10    4.79    0.63
   0  -4  10    5.82    0.75
   0  -4  10    7.21    0.80
   0  -4 -10    6.08    0.85
   0  -4  10    4.78    0.61
   0  -4 -10    7.02    0.71
   0  -4 -10    6.03    0.72
   0  -4 -10    8.39    0.90
   0  -4  10    4.08    0.58
   0   4  12    1.70    0.47
   0   4 -12    1.14    0.59
   0   4  12    1.11    0.48
   0   4  12    0.47    0.40
   0   4  12    0.66    0.51
   0   4 -12    0.68    0.42
   0  -4  12    1.48    0.43
   0  -4 -12    0.28    0.47
   0  -4  12    1.36    0.50
   0  -4 -12    1.20    0.60
   0  -4  12    1.02    0.31
   0  -4 -12    1.39    0.38
   0   4  14    4.21    0.75
   0   4  14    5.04    0.78
   0   4  14    4.99    0.70
   0   4 -14    5.51    0.94
   0   4 -14    3.13    0.76
   0   4  14    5.52    0.73
   0  -4 -14    5.80    0.84
   0  -4  14    4.78    0.64
   0  -4 -14    4.96    0.97
   0  -4  14    4.65    0.70
   0  -4  14    5.11    0.80
   0  -4 -14    4.19    0.61
   0   4  16    6.30    0.83
   0   4  16    7.95    1.00
   0   4  16    5.67    0.85
   0   4  16    5.72    0.84
   0  -4  16    5.38    0.89
   0  -4 -16    5.20    1.07
   0   5  -1   -0.10    0.22
   0   5   1   -0.51    0.25
   0   5  -1    0.09    0.20
   0   5  -1   -0.09    0.17
   0   5  -1   -0.44    0.23
   0   5  -1    0.00    0.24
   0   5  -1   -0.39    0.25
   0   5  -1   -0.82    0.22
   0   5   1   -0.43    0.27
   0   5   1   -0.16    0.23
   0   5   1   -0.19    0.21
   0   5   1   -0.42    0.26
   0   5  -1   -0.15    0.25
   0   5   1   -0.55    0.22
   0   5   1   -0.30    0.21
   0   5   1   -0.56    0.25
   0   5  -1   -0.34    0.22
   0   5  -1   -0.40    0.22
   0   5   1   -0.43    0.22
   0  -5   1   -0.19    0.27
   0  -5   1   -0.21    0.28
   0  -5   1    0.50    0.21
   0  -5   1   -0.26    0.21
   0  -5   1    0.45    0.27
   0  -5  -1   -0.32    0.20
   0  -5  -1   -0.13    0.22
   0  -5  -1   -0.39    0.25
   0  -5  -1   -0.05    0.24
   0  -5   1   -0.30    0.21
   0  -5  -1   -0.18    0.23
   0  -5  -1   -0.30    0.26
   0  -5  -1   -0.44    0.27
   0  -5  -1   -0.07    0.24
   0  -5   1   -0.38    0.22
   0  -5  -1   -0.26    0.26
   0  -5   1    0.38    0.22
   0  -5   1   -0.32    0.22
   0  -5  -1   -0.45    0.25
   0   5   3    0.68    0.27
   0   5   3    0.34    0.25
   0   5   3    0.89    0.29
   0   5   3   -0.16    0.35
   0   5  -3    0.01    0.20
   0  -5  -3   -0.22    0.23
   0  -5  -3    0.46    0.29
   0  -5  -3    0.45    0.25
   0   5   5    0.39    0.31
   0   5   5   -0.08    0.30
   0   5   5    0.05    0.28
   0   5   5   -0.24    0.26
   0   5  -5    0.88    0.26
   0   5   5   -0.13    0.31
   0   5  -5    0.50    0.23
   0   5  -5    0.28    0.24
   0   5   5    0.02    0.33
   0   5   5    0.16    0.43
   0  -5  -5   -0.19    0.23
   0  -5  -5   -0.01    0.21
   0  -5  -5   -0.11    0.22
   0  -5   5   -0.10    0.30
   0  -5  -5   -0.04    0.38
   0  -5   5    0.65    0.20
   0  -5  -5    0.17    0.33
   0  -5   5   -0.15    0.24
   0  -5   5    0.17    0.31
   0  -5  -5    0.38    0.31
   0  -5  -5   -0.18    0.34
   0   5   7   10.50    1.16
   0  -5   7   16.09    1.35
   0   5  -9    1.11    0.33
   0   5   9    1.69    0.41
   0   5   9    1.67    0.37
   0  -5   9    0.83    0.35
   0  -5  -9    2.53    0.47
   0  -5   9    0.85    0.27
   0  -5  -9    1.53    0.31
   0  -5  -9    2.26    0.52
   0  -5   9    1.75    0.39
   0   5  11    0.47    0.41
   0   5 -11    1.52    0.56
   0   5 -11    1.50    0.38
   0   5  11    1.18    0.49
   0   5 -11    1.99    0.48
   0   5  11    0.53    0.41
   0  -5  11    1.54    0.45
   0  -5 -11    0.98    0.48
   0  -5 -11    0.50    0.54
   0  -5 -11    1.49    0.35
   0  -5 -11    1.16    0.35
   0  -5  11    1.21    0.41
   0   5  13   -0.54    0.45
   0   5  13    0.11    0.39
   0   5 -13    0.78    0.59
   0   5  13   -0.34    0.39
   0   5  13    0.86    0.52
   0  -5  13    0.38    0.40
   0  -5 -13    0.69    0.36
   0  -5  13   -0.26    0.41
   0  -5 -13   -0.08    0.49
   0   5  15   -0.56    0.43
   0   5  15    0.05    0.45
   0   5  15   -0.08    0.38
   0   5  15   -0.01    0.49
   0   5  15    0.44    0.39
   0  -5  15   -0.23    0.42
   0  -5 -15   -0.61    0.64
   0  -5  15   -0.11    0.45
   0  -5 -15   -0.14    0.34
   0  -5 -15    0.26    0.52
   0   5  17   -0.27    0.50
   0   5  17   -0.18    0.43
   0   5  17    0.05    0.45
   0   5  17    0.70    0.60
   0   5  17   -0.06    0.55
   0  -5 -17    0.54    0.58
   0  -5  17   -0.93    0.45
   0   6   0  254.05   20.63
   0   6   0  257.01   20.63
   0   6   0  256.04   20.63
   0   6   0  266.60   20.63
   0   6   0  248.56   20.63
   0   6   0  255.07   20.63
   0   6   0  265.20   20.65
   0   6   0  301.90   20.63
   0   6   0  262.18   20.63
   0  -6   0  263.13   20.65
   0  -6   0  254.38   20.62
   0  -6   0  256.06   20.64
   0  -6   0  279.82   20.63
   0  -6   0  260.36   20.63
   0  -6   0  251.48   20.63
   0  -6   0  264.46   20.63
   0  -6   0  249.35   20.66
   0  -6   0  247.08   20.63
   0  -6   0  264.60   20.63
   0  -6   0  251.79   20.62
   0   6   2   77.95    6.19
   0   6  -2   81.80    6.18
   0   6   2   75.96    6.24
   0   6  -2   84.26    6.19
   0   6   2   80.01    6.21
   0   6   2   80.67    6.23
   0   6   2   72.06    6.22
   0   6   2   79.08    6.24
   0   6   2   77.98    6.19
   0   6  -2   77.51    6.21
   0   6  -2   76.83    6.18
   0   6  -2   77.40    6.19
   0   6  -2   81.54    6.19
   0   6   2   70.37    6.21
   0   6   2   77.78    6.20
   0   6  -2   78.77    6.23
   0  -6   2   74.32    6.24
   0  -6  -2   71.17    6.21
   0  -6  -2   73.19    6.22
   0  -6   2   81.58    6.19
   0  -6   2   82.26    6.22
   0  -6   2   77.91    6.18
   0  -6   2   80.11    6.18
   0  -6  -2   75.04    6.22
   0  -6  -2   72.30    6.19
   0  -6   2   79.33    6.18
   0  -6   2   79.73    6.19
   0  -6  -2   73.22    6.19
   0  -6  -2   74.23    6.23
   0  -6   2   83.10    6.22
   0   6   4   43.52    3.63
   0   6  -4   42.58    3.72
   0   6   4   45.63    3.63
   0   6   4   42.48    3.62
   0   6   4   44.89    3.65
   0   6   4   43.96    3.63
   0   6   4   45.97    3.64
   0   6  -4   43.41    3.61
   0   6   4   44.78    3.64
   0   6   4   47.28    3.61
   0   6   4   49.06    3.64
   0  -6   4   44.28    3.61
   0  -6  -4   42.24    3.64
   0  -6  -4   44.73    3.64
   0  -6  -4   45.57    3.64
   0  -6   4   39.70    3.61
   0  -6  -4   44.41    3.61
   0  -6   4   43.01    3.59
   0  -6  -4   46.22    3.64
   0  -6  -4   41.23    3.60
   0  -6  -4   47.41    3.60
   0  -6   4   46.84    3.67
   0  -6  -4   47.55    3.65
   0   6  -6  180.61   14.56
   0   6  -6  175.46   14.57
   0   6   6  186.04   14.61
   0   6   6  184.04   14.58
   0   6   6  171.97   14.59
   0   6   6  175.21   14.60
   0   6  -6  183.84   14.57
   0   6  -6  175.57   14.55
   0   6   6  184.45   14.56
   0  -6   6  186.30   14.58
   0  -6  -6  179.70   14.59
   0  -6   6  190.16   14.57
   0  -6  -6  193.06   14.56
   0  -6  -6  181.10   14.60
   0  -6  -6  177.57   14.55
   0  -6  -6  204.54   14.57
   0  -6   6  185.95   14.58
   0  -6   6  185.43   14.55
   0  -6  -6  184.05   14.60
   0   6  -8   53.16    5.12
   0   6   8   69.79    5.14
   0   6   8   67.36    5.12
   0   6  -8   65.62    5.08
   0   6  -8   63.17    5.11
   0   6   8   67.83    5.11
   0   6  -8   64.07    5.07
   0   6  -8   62.24    5.07
   0   6   8   67.53    5.14
   0  -6  -8   61.19    5.11
   0  -6  -8   69.07    5.08
   0  -6   8   68.20    5.11
   0  -6  -8   64.43    5.07
   0  -6   8   53.66    5.09
   0  -6   8   58.26    5.07
   0  -6   8   64.14    5.11
   0  -6  -8   61.11    5.06
   0  -6  -8   61.58    5.17
   0  -6  -8   66.64    5.13
   0  -6   8   53.91    5.06
   0   6  10   49.84    4.04
   0   6 -10   49.63    4.02
   0   6 -10   48.13    3.99
   0   6  10   52.59    4.07
   0   6  10   53.19    4.08
   0   6  10   48.28    4.03
   0  -6 -10   46.62    3.98
   0  -6  10   45.59    4.01
   0  -6 -10   48.68    4.06
   0  -6  10   46.79    4.05
   0  -6 -10   49.70    4.11
   0  -6 -10   50.35    3.99
   0   6  12   79.52    6.01
   0   6 -12   70.71    5.90
   0   6  12   77.24    5.99
   0   6  12   70.16    5.96
   0  -6 -12   75.76    5.91
   0  -6 -12   74.42    6.07
   0  -6  12   71.42    5.94
   0  -6 -12   68.88    5.88
   0  -6 -12   75.57    6.00
   0  -6  12   69.05    5.97
   0   6  14   -0.33    0.38
   0   6  14    0.33    0.46
   0   6  14    0.42    0.54
   0   6  14    0.95    0.56
   0   6 -14    0.52    0.40
   0  -6 -14    0.20    0.35
   0  -6 -14   -0.21    0.51
   0  -6 -14    0.62    0.64
   0  -6  14   -0.61    0.37
   0   6  16    0.72    0.50
   0   6  16    1.28    0.48
   0   6  16    0.98    0.59
   0   6  16    2.04    0.64
   0  -6 -16    1.32    0.45
   0  -6  16    1.43    0.54
   0  -6 -16    1.29    0.64
   0  -6  16    0.90    0.62
   0  -6 -16    1.51    0.83
   0   7   1    0.28    0.25
   0   7   1    0.70    0.30
   0   7  -1    0.53    0.27
   0   7  -1    0.04    0.20
   0   7  -1   -0.26    0.26
   0   7  -1   -0.65    0.25
   0   7  -1   -0.84    0.24
   0   7   1    0.52    0.27
   0   7   1    0.50    0.25
   0   7  -1    0.04    0.24
   0   7   1   -0.17    0.31
   0   7  -1   -0.16    0.24
   0   7   1    0.08    0.23
   0   7   1    0.29    0.28
   0   7   1    0.27    0.23
   0   7  -1   -0.12    0.20
   0   7  -1    0.00    0.20
   0   7   1    0.00    0.26
   0  -7  -1    0.42    0.27
   0  -7  -1   -0.01    0.21
   0  -7   1   -0.17    0.24
   0  -7   1   -0.20    0.19
   0  -7   1   -0.22    0.26
   0  -7  -1   -0.41    0.28
   0  -7   1   -0.46    0.27
   0  -7   1    0.05    0.22
   0  -7   1   -0.37    0.23
   0  -7  -1    0.56    0.27
   0  -7  -1   -0.05    0.25
   0  -7   1   -0.63    0.28
   0  -7  -1   -0.89    0.29
   0  -7   1    0.36    0.25
   0  -7  -1    0.32    0.25
   0  -7  -1    0.04    0.23
   0  -7  -1   -0.51    0.24
   0  -7   1   -0.03    0.23
   0   7  -3    1.30    0.32
   0   7   3    0.16    0.24
   0   7   3    0.79    0.27
   0   7   3    0.44    0.31
   0   7   3    0.42    0.29
   0   7   3    0.51    0.28
   0   7   3    0.45    0.27
   0   7  -3    1.45    0.24
   0   7   3    0.91    0.33
   0   7   3    1.16    0.30
   0   7   3   -0.14    0.27
   0   7   3   -0.30    0.25
   0   7  -3    1.11    0.31
   0  -7   3    1.06    0.25
   0  -7  -3    0.55    0.28
   0  -7   3    1.26    0.34
   0  -7   3    1.16    0.34
   0  -7  -3    0.82    0.35
   0  -7  -3    0.64    0.31
   0  -7  -3    0.71    0.32
   0  -7  -3    1.59    0.38
   0  -7   3    0.57    0.29
   0  -7  -3    0.33    0.23
   0  -7  -3    1.42    0.36
   0  -7  -3    1.18    0.33
   0  -7  -3    0.30    0.24
   0  -7   3    1.22    0.27
   0   7   5    0.38    0.38
   0   7   5   -0.01    0.31
   0   7   5    0.88    0.40
   0  -7  -5    0.85    0.39
   0  -7  -5    0.44    0.25
   0   7   7    1.41    0.39
   0   7  -7    0.41    0.25
   0   7   7    1.15    0.36
   0   7   7    0.83    0.30
   0   7   7    1.12    0.39
   0  -7   7    0.72    0.25
   0  -7  -7    0.85    0.28
   0  -7  -7    0.27    0.25
   0  -7   7    1.13    0.33
   0  -7   7    1.04    0.32
   0  -7  -7    0.98    0.37
   0  -7  -7    0.70    0.26
   0   7   9    0.79    0.42
   0   7  -9    1.17    0.36
   0   7   9    1.07    0.43
   0   7   9    1.08    0.38
   0   7   9    0.77    0.47
   0  -7  -9    1.13    0.31
   0  -7   9    1.36    0.39
   0  -7  -9    1.52    0.46
   0  -7  -9    1.74    0.52
   0  -7   9    0.94    0.37
   0  -7  -9    1.36    0.46
   0  -7  -9    1.54    0.33
   0   7 -11    0.32    0.37
   0   7  11   -0.16    0.39
   0   7  11    0.03    0.40
   0   7  11    0.23    0.47
   0   7  11   -0.27    0.49
   0  -7 -11    0.55    0.54
   0  -7  11    0.57    0.40
   0  -7  11    0.53    0.45
   0  -7 -11    0.27    0.34
   0  -7 -11    0.12    0.35
   0  -7 -11    0.32    0.49
   0   7  13    0.58    0.47
   0   7  13   -0.25    0.40
   0   7  13    0.31    0.51
   0   7 -13    0.85    0.42
   0   7  13    0.37    0.57
   0  -7  13    0.47    0.42
   0  -7 -13   -0.02    0.49
   0  -7 -13    0.90    0.38
   0  -7  13    0.67    0.51
   0  -7 -13    0.39    0.36
   0  -7 -13    1.37    0.67
   0   7  15   -0.21    0.53
   0   7  15   -0.22    0.47
   0   7  15    0.79    0.52
   0   7  15    0.08    0.53
   0  -7  15    0.26    0.61
   0  -7 -15    1.23    0.60
   0  -7  15   -0.17    0.52
   0  -7 -15    0.27    0.66
   0  -7 -15    0.34    0.38
   0   7  17   -0.02    0.57
   0   7  17    0.32    0.47
   0   7  17    0.25    0.45
   0   7  17    0.58    0.62
   0   7  17    0.58    0.59
   0  -7 -17    0.02    0.42
   0  -7 -17    0.12    0.75
   0  -7  17   -0.06    0.55
   0  -7 -17   -1.00    0.56
   0   8   0  228.76   18.70
   0   8   0  229.90   18.71
   0   8   0  243.11   18.74
   0   8   0  234.61   18.72
   0   8   0  240.29   18.74
   0   8   0  233.03   18.71
   0   8   0  233.00   18.72
   0   8   0  239.66   18.71
   0   8   0  237.71   18.71
   0  -8   0  255.97   18.74
   0  -8   0  233.93   18.72
   0  -8   0  244.06   18.74
   0  -8   0  230.97   18.71
   0  -8   0  240.01   18.71
   0  -8   0  236.54   18.74
   0  -8   0  228.71   18.70
   0  -8   0  244.50   18.71
   0  -8   0  240.46   18.70
   0  -8   0  216.20   18.71
   0  -8   0  229.10   18.71
   0   8   2   91.79    7.68
   0   8  -2   95.22    7.69
   0   8   2   90.81    7.68
   0   8  -2   99.82    7.66
   0   8  -2   82.88    7.78
   0   8   2   93.93    7.69
   0   8  -2  102.48    7.67
   0   8  -2   99.77    7.67
   0   8  -2   98.62    7.65
   0   8  -2   96.84    7.67
   0   8  -2   99.98    7.68
   0   8   2   92.43    7.68
   0   8   2   92.94    7.70
   0   8  -2  112.29    7.78
   0   8   2   92.25    7.70
   0   8   2   91.98    7.67
   0   8   2   95.90    7.68
   0   8   2   97.94    7.70
   0  -8  -2   87.82    7.67
   0  -8  -2   93.50    7.68
   0  -8   2  102.08    7.69
   0  -8  -2   97.46    7.69
   0  -8   2  100.90    7.71
   0  -8  -2   91.13    7.70
   0  -8   2   98.77    7.66
   0  -8   2  100.42    7.70
   0  -8   2   96.39    7.68
   0  -8  -2   93.59    7.70
   0  -8  -2   89.79    7.68
   0  -8  -2   95.31    7.70
   0  -8  -2   90.62    7.68
   0  -8   2  102.57    7.67
   0  -8   2   98.75    7.67
   0  -8  -2   89.64    7.67
   0  -8   2   99.69    7.67
   0  -8   2  100.21    7.67
   0  -8   2  101.00    7.67
   0   8  -4  111.18    9.20
   0   8  -4  111.33    9.23
   0   8   4  107.83    9.25
   0   8   4  114.61    9.22
   0   8  -4  112.52    9.21
   0   8   4  115.88    9.22
   0   8   4  115.63    9.24
   0   8  -4  121.05    9.22
   0   8  -4  114.20    9.20
   0  -8   4  112.33    9.20
   0  -8  -4  116.54    9.23
   0  -8  -4  115.22    9.21
   0  -8  -4  112.39    9.24
   0  -8  -4  110.88    9.25
   0  -8  -4  123.75    9.24
   0  -8   4  115.96    9.24
   0  -8   4  133.34    9.32
   0  -8   4  125.49    9.26
   0  -8   4  131.02    9.22
   0  -8  -4   99.97    9.21
   0  -8   4  110.13    9.26
   0  -8   4  114.20    9.20
   0   8   6    3.48    0.57
   0   8  -6    3.56    0.42
   0   8   6    2.18    0.48
   0  -8   6    3.80    0.50
   0  -8  -6    3.12    0.42
   0  -8  -6    2.82    0.53
   0  -8  -6    1.97    0.51
   0  -8   6    3.05    0.48
   0   8   8    4.59    0.54
   0   8  -8    3.97    0.50
   0   8   8    3.04    0.63
   0   8  -8    4.10    0.54
   0   8   8    3.02    0.59
   0   8   8    3.40    0.59
   0  -8  -8    4.83    0.53
   0  -8  -8    3.73    0.67
   0  -8  -8    3.72    0.62
   0  -8   8    3.55    0.56
   0  -8   8    4.36    0.60
   0  -8  -8    5.61    0.68
   0   8 -10    9.29    1.01
   0   8 -10   10.85    1.08
   0   8  10   11.22    1.26
   0   8  10    9.60    1.13
   0   8  10    9.56    1.19
   0   8  10   10.10    1.13
   0   8 -10   10.21    1.07
   0  -8  10   10.25    1.09
   0  -8 -10    9.81    1.03
   0  -8 -10    9.16    1.18
   0  -8 -10    9.38    1.06
   0  -8 -10    9.78    1.15
   0  -8 -10   10.82    1.27
   0   8  12   28.85    2.61
   0   8  12   31.22    2.67
   0   8  12   31.12    2.68
   0   8 -12   28.67    2.54
   0   8  12   30.70    2.66
   0  -8 -12   31.45    2.75
   0  -8  12   31.28    2.63
   0  -8 -12   28.88    2.52
   0  -8 -12   28.40    2.54
   0  -8 -12   32.38    2.68
   0  -8  12   27.18    2.57
   0   8 -14    5.46    0.70
   0   8  14    4.05    0.76
   0   8  14    5.59    0.90
   0   8  14    4.93    0.85
   0   8  14    4.32    0.73
   0  -8 -14    4.52    0.62
   0  -8 -14    4.73    0.95
   0  -8  14    4.58    0.77
   0  -8  14    2.23    0.79
   0  -8 -14    5.67    0.97
   0  -8 -14    3.52    0.58
   0   8  16    4.43    0.90
   0   8  16    5.03    0.92
   0   8  16    4.68    0.92
   0   8  16    6.09    0.88
   0  -8  16    5.34    0.81
   0  -8 -16    3.44    0.66
   0  -8 -16    6.23    0.99
   0  -8 -16    7.05    1.15
   0   9  -1   -0.02    0.24
   0   9   1    0.36    0.27
   0   9   1    1.00    0.32
   0   9   1    0.30    0.34
   0   9  -1   -0.24    0.23
   0   9  -1   -0.27    0.22
   0   9  -1   -0.28    0.28
   0   9   1    0.15    0.25
   0   9  -1   -0.05    0.27
   0   9   1    0.26    0.29
   0   9  -1   -0.35    0.29
   0   9  -1    0.03    0.26
   0   9  -1   -0.27    0.27
   0   9   1    0.36    0.32
   0   9   1    0.49    0.26
   0   9   1    0.35    0.29
   0  -9   1   -0.14    0.28
   0  -9  -1    0.01    0.31
   0  -9  -1   -0.04    0.29
   0  -9  -1    0.21    0.22
   0  -9   1    0.67    0.31
   0  -9   1   -0.12    0.36
   0  -9  -1    0.18    0.29
   0  -9   1   -0.14    0.26
   0  -9   1    0.11    0.26
   0  -9  -1   -0.22    0.29
   0  -9  -1   -0.06    0.34
   0  -9  -1   -0.23    0.33
   0  -9   1   -0.46    0.32
   0  -9   1   -0.23    0.29
   0   9  -3    0.09    0.99
   0  -9  -3    0.29    1.45
   0  -9   3    0.70    1.08
   0  -9  -3    0.16    1.30
   0   9   5   20.47    1.74
   0  -9  -5   19.34    1.73
   0  -9  -5   19.50    1.70
   0  -9  -5   16.34    1.73
   0   9  -7   -0.22    0.31
   0   9   7    0.23    0.30
   0   9   7    0.07    0.41
   0   9  -7    0.02    0.25
   0   9   7    0.04    0.35
   0   9   7   -0.07    0.38
   0  -9   7    0.53    0.38
   0  -9  -7   -0.04    0.24
   0  -9   7    0.13    0.30
   0  -9  -7    0.43    0.39
   0  -9  -7   -0.63    0.36
   0  -9   7    0.05    0.34
   0   9  -9    0.13    0.37
   0   9   9    0.88    0.50
   0   9   9    0.19    0.52
   0   9  -9    0.45    0.31
   0   9   9    0.39    0.40
   0   9   9    0.15    0.35
   0  -9  -9    0.38    0.43
   0  -9  -9    0.45    0.32
   0  -9   9   -0.12    0.40
   0  -9  -9    0.32    0.41
   0  -9   9   -0.01    0.37
   0  -9  -9    1.07    0.50
   0   9 -11    0.63    0.42
   0   9  11    0.16    0.41
   0   9  11    0.26    0.56
   0   9 -11   -0.16    0.33
   0   9  11   -0.19    0.48
   0   9  11    0.53    0.46
   0  -9 -11    0.86    0.58
   0  -9  11    0.88    0.46
   0  -9 -11    0.30    0.31
   0  -9  11    0.56    0.45
   0  -9 -11    0.50    0.50
   0  -9 -11   -0.10    0.33
   0   9 -13    0.38    0.64
   0   9  13    0.49    0.56
   0   9  13    0.70    0.45
   0   9  13    0.19    0.58
   0  -9 -13   -0.21    0.35
   0  -9 -13    0.45    0.64
   0  -9  13    0.11    0.48
   0  -9 -13   -0.08    0.60
   0  -9 -13    0.42    0.35
   0  -9  13    0.37    0.67
   0   9 -15    0.30    0.45
   0   9  15    0.55    0.63
   0   9  15   -0.40    0.47
   0   9  15    0.63    0.47
   0  -9 -15    0.69    0.40
   0  -9 -15    0.35    0.69
   0  -9  15    0.55    0.99
   0  -9  15    0.79    0.54
   0  -9 -15   -0.59    0.50
   0  10   0   71.53    5.52
   0  10   0   75.79    5.53
   0  10   0   69.67    5.54
   0  10   0   58.30    5.50
   0  10   0   57.89    5.50
   0  10   0   67.58    5.52
   0 -10   0   81.07    5.59
   0 -10   0   71.02    5.52
   0 -10   0   67.57    5.52
   0 -10   0   67.38    5.56
   0  10  -2   54.90    4.57
   0  10  -2   51.22    4.57
   0  10  -2   54.68    4.57
   0  10  -2   57.23    4.57
   0  10   2   57.63    4.57
   0  10   2   58.52    4.59
   0  10   2   59.27    4.59
   0  10  -2   59.78    4.60
   0  10  -2   58.99    4.55
   0  10   2   56.99    4.62
   0  10   2   56.86    4.59
   0  10   2   56.24    4.61
   0  10  -2   57.46    4.56
   0 -10   2   55.37    4.65
   0 -10  -2   54.71    4.64
   0 -10   2   56.65    4.62
   0 -10   2   57.40    4.57
   0 -10   2   55.02    4.57
   0 -10  -2   57.95    4.60
   0 -10  -2   53.75    4.60
   0 -10   2   56.81    4.56
   0 -10  -2   56.73    4.63
   0 -10   2   56.17    4.59
   0  10  -4  120.71    9.20
   0  10   4  119.83    9.25
   0  10   4  116.64    9.22
   0  10   4  110.21    9.25
   0  10   4  104.18    9.24
   0  10  -4  112.58    9.19
   0  10  -4  119.80    9.20
   0  10  -4  122.34    9.23
   0  10   4  108.32    9.20
   0 -10  -4  109.44    9.21
   0 -10   4  122.10    9.26
   0 -10   4  119.40    9.20
   0 -10  -4  108.49    9.25
   0 -10  -4  115.04    9.24
   0 -10   4  124.88    9.27
   0 -10   4  108.49    9.18
   0 -10  -4  119.79    9.25
   0  10  -6   18.10    1.58
   0  10   6   19.17    1.71
   0  10  -6   19.00    1.62
   0  10   6   18.23    1.61
   0  10   6   19.50    1.69
   0  10   6   19.96    1.92
   0 -10   6   18.43    1.56
   0 -10   6   18.11    1.65
   0 -10  -6   16.49    1.91
   0 -10   6   19.58    1.68
   0 -10  -6   16.69    1.67
   0 -10  -6   18.20    1.66
   0 -10  -6   17.87    1.59
   0 -10   6   17.37    1.61
   0 -10  -6   16.92    1.63
   0  10  -8    9.71    1.09
   0  10   8   12.81    1.50
   0  10  -8   10.36    1.03
   0  10   8   10.88    1.10
   0  10   8    9.43    1.14
   0  10   8   10.96    1.19
   0 -10  -8    9.63    1.17
   0 -10  -8   11.65    1.19
   0 -10  -8    9.98    1.06
   0 -10  -8    9.07    1.19
   0 -10   8   11.67    1.15
   0 -10   8   10.28    1.10
   0  10 -10   10.86    1.24
   0  10  10   10.60    1.27
   0  10  10   12.30    1.32
   0  10  10   12.57    1.45
   0  10  10   11.16    1.41
   0  10 -10   12.53    1.20
   0 -10 -10   10.41    1.32
   0 -10  10   12.98    1.31
   0 -10  10   13.07    1.29
   0 -10 -10    9.31    1.30
   0 -10 -10   12.31    1.41
   0 -10 -10   14.55    1.20
   0  10  12    3.22    0.67
   0  10 -12    1.95    0.63
   0  10  12    2.18    0.54
   0  10  12    2.12    0.66
   0  10  12    1.31    0.56
   0 -10  12    1.70    0.67
   0 -10  12    3.73    0.63
   0 -10 -12    3.72    0.89
   0 -10 -12    2.60    0.69
   0 -10 -12    2.25    0.51
   0 -10 -12    1.05    0.43
   0  10  14    0.02    0.48
   0  10  14   -0.06    0.56
   0  10 -14   -0.50    0.43
   0  10  14    0.05    0.44
   0  10  14    0.37    0.61
   0 -10 -14    0.64    0.41
   0 -10 -14    0.02    0.59
   0 -10  14    0.29    0.48
   0 -10 -14    0.61    0.40
   0 -10  14    0.36    0.51
   0 -10 -14   -0.82    0.58
   0  10 -16   -0.18    0.56
   0  10  16    0.07    0.56
   0  10  16    0.52    0.52
   0  10  16    0.52    0.66
   0 -10 -16    0.58    0.67
   0 -10  16    0.77    0.59
   0 -10 -16    0.86    0.88
   0 -10 -16   -0.06    0.43
   0 -10  16    2.53    0.69
   0  11  -1   -0.75    0.35
   0  11  -1   -1.19    0.33
   0  11  -1    0.18    0.26
   0  11  -1   -0.72    0.35
   0  11   1   -1.37    0.38
   0  11   1   -1.15    0.37
   0  11  -1   -0.66    0.36
   0  11   1   -1.48    0.38
   0  11   1   -0.21    0.26
   0 -11   1   -1.54    0.43
   0 -11   1   -0.55    0.42
   0 -11   1   -0.86    0.29
   0 -11  -1   -0.79    0.37
   0  11  -3   -0.12    0.18
   0  11   3    0.24    0.28
   0 -11   3    0.54    0.26
   0  11   5   -0.25    0.36
   0  11  -5   -0.06    0.25
   0  11   5   -0.05    0.37
   0  11  -5    0.28    0.32
   0  11  -5   -0.36    0.23
   0  11   5    0.01    0.30
   0  11   5   -0.17    0.31
   0 -11  -5   -0.04    0.25
   0 -11   5   -0.46    0.37
   0 -11  -5    0.08    0.37
   0 -11  -5   -0.02    0.35
   0 -11  -5    0.10    0.36
   0 -11   5    0.59    0.34
   0 -11   5   -0.13    0.23
   0 -11  -5    0.00    0.34
   0 -11   5   -0.51    0.33
   0  11   7    0.65    0.45
   0  11   7    1.38    0.52
   0  11  -7    1.12    0.43
   0  11  -7    1.49    0.36
   0  11   7    0.22    0.37
   0  11   7    0.75    0.38
   0 -11  -7    0.74    0.32
   0 -11  -7    0.77    0.48
   0 -11   7    1.26    0.49
   0 -11   7    0.97    0.45
   0 -11  -7    1.40    0.46
   0 -11   7    2.03    0.43
   0 -11  -7    0.74    0.60
   0  11  -9    0.95    0.46
   0  11  -9   -0.10    0.32
   0  11   9    0.59    0.40
   0  11   9    0.22    0.54
   0  11   9    0.56    0.42
   0  11   9    0.46    0.50
   0  11   9   -0.35    0.38
   0 -11   9    0.62    0.47
   0 -11  -9    0.44    0.33
   0 -11  -9   -0.35    0.41
   0 -11   9   -0.01    0.78
   0 -11  -9    0.24    0.51
   0 -11  -9    1.09    0.52
   0  11  11    0.09    0.58
   0  11  11   -0.44    0.52
   0  11  11   -0.02    0.40
   0  11 -11    0.15    0.42
   0  11  11    0.56    0.40
   0  11 -11    0.25    0.62
   0  11  11    0.44    0.47
   0 -11 -11    0.29    0.34
   0 -11 -11   -0.43    0.41
   0 -11 -11   -0.33    0.48
   0 -11 -11    0.51    0.46
   0 -11 -11   -0.07    0.52
   0 -11  11    0.49    0.43
   0 -11  11    0.76    0.50
   0  11  13    0.78    0.62
   0  11  13    0.59    0.55
   0  11  13    0.02    0.47
   0  11 -13    0.85    0.50
   0  11  13    0.80    0.56
   0 -11  13    0.76    0.56
   0 -11 -13   -0.17    0.35
   0 -11  13    1.16    0.51
   0 -11 -13    0.14    0.63
   0 -11 -13    0.11    0.38
   0 -11 -13   -0.12    0.54
   0  11  15    0.37    0.57
   0  11  15    0.11    0.65
   0  11 -15    0.33    0.49
   0  11  15    0.02    0.48
   0 -11  15    0.01    0.57
   0 -11  15    0.71    0.53
   0 -11 -15    0.15    0.62
   0 -11 -15    1.11    0.72
   0 -11 -15    0.20    0.45
   0 -11 -15   -0.31    0.39
   0  12   0    2.11    0.40
   0  12   0    2.99    0.47
   0  12   0    2.87    0.49
   0 -12   0    1.96    0.42
   0 -12   0    2.68    0.43
   0  12   2   24.83    2.15
   0  12  -2   25.75    2.05
   0  12  -2   23.16    2.07
   0  12   2   20.77    2.10
   0  12  -2   25.85    2.11
   0  12   2   23.64    2.13
   0  12  -2   24.51    2.09
   0  12  -2   25.06    2.09
   0  12   2   22.77    2.10
   0  12   2   24.85    2.10
   0  12   2   24.53    2.09
   0 -12  -2   25.56    2.16
   0 -12   2   27.86    2.17
   0 -12   2   24.37    2.17
   0 -12   2   26.52    2.11
   0 -12   2   24.60    2.06
   0 -12  -2   24.53    2.17
   0 -12  -2   22.96    2.10
   0 -12  -2   22.65    2.10
   0 -12   2   24.56    2.08
   0  12   4   22.69    2.25
   0  12  -4   26.37    2.17
   0  12  -4   25.34    2.12
   0  12  -4   27.13    2.10
   0  12   4   23.19    2.32
   0  12   4   26.38    2.19
   0  12  -4   25.54    2.13
   0  12   4   24.30    2.13
   0  12   4   22.92    2.14
   0 -12   4   23.21    2.09
   0 -12   4   27.13    2.23
   0 -12  -4   24.86    2.15
   0 -12  -4   25.07    2.18
   0 -12  -4   26.69    2.22
   0 -12   4   24.71    2.11
   0 -12   4   26.24    2.20
   0 -12  -4   22.23    2.17
   0 -12   4   25.93    2.16
   0 -12  -4   25.11    2.21
   0 -12   4   25.41    2.09
   0  12   6    1.42    0.54
   0  12  -6    1.96    0.38
   0  12  -6    1.93    0.46
   0  12   6    1.31    0.45
   0  12   6    1.18    0.52
   0  12   6    1.49    0.60
   0  12  -6    2.09    0.40
   0 -12  -6    1.20    0.47
   0 -12  -6    1.83    0.50
   0 -12   6    1.34    0.53
   0 -12  -6    1.21    0.47
   0 -12   6    1.82    0.48
   0 -12   6    1.22    0.52
   0 -12  -6    2.21    0.40
   0 -12  -6    2.21    0.98
   0  12   8    5.48    0.76
   0  12  -8    5.33    0.84
   0  12   8    5.21    0.71
   0  12   8    6.14    0.84
   0  12  -8    3.60    0.61
   0  12   8    5.37    0.80
   0 -12   8    6.32    0.91
   0 -12  -8    6.59    0.81
   0 -12   8    4.26    0.75
   0 -12  -8    5.41    0.78
   0 -12  -8    5.39    0.82
   0 -12   8    4.94    0.73
   0 -12  -8    5.38    0.66
   0  12  10   10.20    1.09
   0  12  10    7.93    1.06
   0  12  10   10.63    1.20
   0  12 -10   11.31    1.17
   0  12  10    9.81    1.16
   0  12  10   10.83    1.26
   0  12 -10    8.07    0.97
   0 -12 -10    8.66    1.16
   0 -12 -10    8.75    1.14
   0 -12  10   10.20    1.13
   0 -12 -10   10.05    1.03
   0 -12  10    8.67    1.12
   0 -12 -10    8.92    1.15
   0  12  12   23.48    2.12
   0  12  12   23.16    2.11
   0  12 -12   21.59    1.98
   0  12  12   19.92    1.99
   0 -12 -12   25.19    2.13
   0 -12 -12   17.02    2.00
   0 -12  12   19.61    1.96
   0 -12 -12   20.49    1.92
   0 -12 -12   21.39    2.14
   0 -12 -12   19.78    1.89
   0 -12  12   21.98    2.02
   0  12  14    4.97    0.86
   0  12  14    2.94    0.71
   0  12  14    2.68    0.84
   0  12  14    4.70    0.92
   0  12 -14    3.22    0.66
   0 -12  14    4.40    0.80
   0 -12 -14    3.60    0.63
   0 -12 -14    3.40    0.86
   0 -12  14    3.67    0.71
   0 -12 -14    2.63    0.90
   0 -12 -14    3.50    0.95
   0  13  -1    0.33    0.28
   0  13   1   -0.20    0.30
   0  13  -1    0.16    0.34
   0  13  -1   -0.13    0.32
   0  13   1    0.79    0.31
   0  13   1   -0.35    0.23
   0  13   1    0.09    0.33
   0  13  -1   -0.09    0.31
   0  13   1    0.43    0.37
   0  13  -1    0.42    0.33
   0  13   1    0.29    0.35
   0 -13   1    0.12    0.28
   0 -13   1    0.21    0.31
   0 -13  -1   -0.01    0.37
   0 -13   1   -0.12    0.38
   0 -13   1    0.22    0.30
   0 -13  -1   -0.05    0.30
   0 -13  -1   -0.09    0.30
   0 -13  -1    0.19    0.36
   0 -13   1   -0.11    0.37
   0  13   3   -0.30    0.36
   0  13   3    0.22    0.30
   0  13  -3    0.10    0.31
   0  13  -3   -0.08    0.31
   0  13  -3   -0.28    0.32
   0  13   3   -0.09    0.29
   0  13  -3   -0.14    0.21
   0 -13   3   -0.07    0.37
   0 -13  -3    0.20    0.39
   0 -13   3    0.19    0.42
   0 -13  -3    0.38    0.35
   0 -13   3   -0.26    0.34
   0 -13  -3   -0.18    0.34
   0 -13   3   -0.16    0.25
   0 -13   3   -0.15    0.29
   0  13  -5   -0.34    0.29
   0  13  -5   -0.36    0.42
   0  13   5   -0.17    0.36
   0  13   5   -0.22    0.34
   0  13   5   -0.09    0.41
   0  13   5    0.28    0.42
   0  13  -5   -0.58    0.30
   0 -13   5    0.37    0.27
   0 -13  -5   -0.01    0.37
   0 -13  -5   -0.26    0.38
   0 -13  -5   -0.35    0.42
   0 -13  -5    0.23    0.44
   0 -13   5    0.17    0.40
   0 -13   5    0.17    0.45
   0 -13  -5    0.01    0.30
   0 -13   5   -0.13    0.27
   0  13   7   -0.08    0.47
   0  13   7   -0.35    0.39
   0  13  -7   -0.39    0.34
   0  13  -7   -0.27    0.38
   0  13   7    0.62    0.40
   0  13   7   -0.28    0.48
   0 -13  -7   -0.06    0.44
   0 -13   7   -0.58    0.39
   0 -13   7   -0.62    0.44
   0 -13  -7   -0.37    0.42
   0 -13   7   -0.43    0.27
   0 -13  -7   -0.64    0.41
   0 -13   7   -0.42    0.45
   0 -13  -7   -0.56    0.45
   0 -13  -7   -0.46    0.28
   0  13   9   -0.74    0.39
   0  13  -9    0.04    0.43
   0  13  -9   -0.06    0.34
   0  13   9   -0.25    0.54
   0  13   9    0.17    0.43
   0  13   9    0.00    0.54
   0 -13  -9   -0.26    0.47
   0 -13   9   -0.16    0.45
   0 -13  -9   -0.63    0.48
   0 -13  -9   -0.88    0.46
   0 -13   9   -0.01    0.48
   0 -13   9   -0.70    0.41
   0 -13  -9   -0.22    0.32
   0  13  11    0.39    0.62
   0  13  11    0.74    0.44
   0  13 -11    0.94    0.50
   0  13  11    1.14    0.63
   0  13  11    0.04    0.46
   0  13  11    1.00    0.80
   0  13 -11    1.01    0.43
   0 -13 -11    1.01    0.40
   0 -13  11    1.02    0.54
   0 -13  11    1.44    0.52
   0 -13 -11    0.95    0.57
   0 -13 -11    1.02    0.54
   0  13  13   -0.23    0.44
   0  13  13    0.10    0.50
   0  13  13   -0.75    0.54
   0  13 -13    0.02    0.47
   0  13  13    0.25    0.66
   0 -13 -13   -0.44    0.56
   0 -13  13    0.35    0.55
   0 -13  13    0.07    0.48
   0 -13 -13   -0.24    0.38
   0 -13 -13    0.17    0.63
   0  13  15    0.20    0.52
   0  13 -15    0.08    0.51
   0  13  15   -0.58    0.64
   0 -13  15    0.02    0.59
   0 -13 -15    0.07    0.65
   0 -13  15    0.06    0.49
   0 -13 -15    0.17    0.42
   0 -13 -15    0.19    0.47
   0  14   0   38.96    3.24
   0  14   0   37.50    3.24
   0  14   0   43.36    3.23
   0  14   0   40.70    3.24
   0  14   0   38.70    3.25
   0 -14   0   35.94    3.22
   0 -14   0   39.03    3.23
   0 -14   0   37.41    3.24
   0 -14   0   37.80    3.30
   0 -14   0   39.05    3.29
   0  14  -2    8.04    0.86
   0  14  -2    7.02    0.77
   0  14  -2    7.53    0.83
   0  14   2    7.24    0.84
   0  14   2    6.29    0.77
   0  14   2    8.21    0.90
   0  14   2    6.06    0.77
   0  14   2    6.35    0.80
   0  14  -2    6.73    0.75
   0 -14  -2    5.56    0.86
   0 -14  -2    5.22    0.83
   0 -14   2    6.55    0.76
   0 -14   2    6.30    0.74
   0 -14   2    7.42    0.90
   0 -14  -2    5.59    0.87
   0 -14   2    5.72    0.86
   0 -14   2    8.40    0.83
   0  14  -4   31.55    2.61
   0  14  -4   32.23    2.65
   0  14   4   32.45    2.71
   0  14   4   28.90    2.63
   0  14   4   31.63    2.68
   0  14   4   28.80    2.62
   0  14   4   30.88    2.66
   0  14  -4   29.75    2.58
   0 -14   4   30.98    2.71
   0 -14   4   29.78    2.58
   0 -14  -4   30.06    2.71
   0 -14   4   34.03    2.74
   0 -14   4   27.76    2.58
   0 -14  -4   30.36    2.66
   0 -14  -4   30.38    2.71
   0 -14  -4   32.57    2.68
   0 -14   4   35.13    2.65
   0  14  -6   15.36    1.29
   0  14  -6   11.62    1.26
   0  14   6   13.42    1.45
   0  14   6   15.12    1.38
   0  14  -6   16.05    1.38
   0  14   6   12.10    1.43
   0 -14  -6   12.03    1.28
   0 -14   6   15.21    1.45
   0 -14  -6   13.19    1.40
   0 -14   6   12.73    1.35
   0 -14  -6   12.91    1.46
   0 -14   6   12.31    1.24
   0 -14  -6   11.24    1.55
   0 -14  -6   14.59    1.50
   0 -14   6   14.27    1.46
   0  14   8    0.29    0.57
   0  14   8    0.44    0.45
   0  14  -8    0.78    0.38
   0  14   8    1.27    0.50
   0  14   8    1.17    0.59
   0  14  -8    0.95    0.48
   0 -14   8    1.37    0.47
   0 -14  -8    0.43    0.37
   0 -14  -8    1.10    0.55
   0 -14  -8    1.30    0.57
   0 -14   8    1.17    0.56
   0 -14  -8    0.98    0.57
   0 -14   8    0.70    0.54
   0 -14  -8    0.74    0.53
   0  14  10   25.37    2.34
   0  14 -10   26.18    2.18
   0  14  10   26.00    2.30
   0  14  10   23.45    2.24
   0  14  10   18.70    2.11
   0 -14  10   23.90    2.16
   0 -14 -10   19.28    2.19
   0 -14 -10   23.01    2.29
   0 -14  10   27.40    2.24
   0 -14  10   26.63    2.25
   0 -14 -10   24.62    2.34
   0 -14 -10   20.40    2.08
   0  14 -12    2.42    0.61
   0  14  12    3.05    0.66
   0  14 -12    1.75    0.50
   0  14  12    1.62    0.67
   0  14  12    3.37    0.80
   0  14  12    2.48    0.55
   0  14  12    2.68    0.80
   0 -14 -12    2.97    0.78
   0 -14 -12    1.83    0.76
   0 -14 -12    2.39    0.68
   0 -14  12    3.19    0.64
   0  14 -14    0.68    0.56
   0  14  14    0.66    0.73
   0  14  14   -0.13    0.55
   0  14  14    0.57    0.66
   0  14  14    0.22    0.53
   0 -14  14    0.66    0.66
   0 -14 -14    0.37    0.69
   0 -14  14    0.54    0.57
   0 -14 -14    0.01    0.43
   0 -14 -14    0.01    0.64
   0 -14 -14    0.72    0.44
   0  15  -1    0.27    0.40
   0  15  -1    0.21    0.28
   0  15   1    0.48    0.41
   0  15   1    0.02    0.30
   0  15   1   -0.49    0.37
   0  15   1   -0.21    0.40
   0  15  -1    0.13    0.43
   0  15  -1   -0.16    0.39
   0  15  -1    0.28    0.38
   0  15   1    0.25    0.40
   0 -15   1    0.56    0.48
   0 -15  -1   -0.03    0.47
   0 -15   1   -0.08    0.43
   0 -15  -1    0.89    0.41
   0 -15   1    0.54    0.48
   0 -15   1    0.19    0.34
   0 -15   1    0.42    0.36
   0 -15  -1    0.30    0.44
   0  15  -3    0.23    0.26
   0  15   3   -0.08    0.40
   0  15   3    0.16    0.37
   0  15   3   -0.27    0.40
   0  15  -3    0.05    0.33
   0  15   3    0.16    0.34
   0  15  -3   -0.40    0.39
   0  15   3    0.33    0.49
   0  15  -3    0.96    0.39
   0 -15  -3   -0.41    0.37
   0 -15   3   -0.28    0.46
   0 -15   3   -0.24    0.41
   0 -15   3   -0.66    0.47
   0 -15  -3   -0.81    0.41
   0 -15  -3   -0.07    0.39
   0 -15   3   -0.36    0.31
   0 -15   3   -0.26    0.28
   0 -15  -3    0.36    0.48
   0  15  -5   -0.51    0.28
   0  15  -5    0.28    0.36
   0  15   5   -0.65    0.46
   0  15   5   -0.80    0.43
   0  15   5   -0.79    0.45
   0  15   5    0.47    0.40
   0  15  -5    0.31    0.45
   0 -15  -5   -0.44    0.50
   0 -15  -5   -0.99    0.42
   0 -15  -5   -0.03    0.44
   0 -15   5   -0.11    0.29
   0 -15  -5   -0.56    0.32
   0 -15   5   -0.57    0.47
   0 -15   5   -0.48    0.46
   0 -15   5   -0.19    0.29
   0  15   7    1.24    0.51
   0  15   7    0.85    0.45
   0  15  -7    0.12    0.37
   0  15   7    0.07    0.50
   0  15  -7    0.12    0.68
   0  15  -7   -0.06    0.43
   0  15   7    0.88    0.62
   0 -15   7    0.29    0.53
   0 -15   7    0.05    0.30
   0 -15   7    0.91    0.45
   0 -15  -7    0.84    0.51
   0 -15  -7    0.19    0.35
   0 -15  -7    1.12    0.48
   0 -15  -7    0.40    0.55
   0 -15  -7    0.52    0.46
   0 -15   7   -0.23    0.49
   0  15   9   -0.33    0.57
   0  15   9    0.14    0.62
   0  15  -9   -0.56    0.35
   0  15  -9   -0.74    0.47
   0  15   9   -0.86    0.41
   0 -15  -9    0.15    0.52
   0 -15  -9   -0.22    0.34
   0 -15   9   -0.07    0.51
   0 -15   9   -0.01    0.44
   0 -15   9   -0.28    0.52
   0 -15  -9   -0.24    0.53
   0  15  11   -0.09    0.47
   0  15  11    0.68    0.67
   0  15 -11    0.07    0.50
   0  15 -11    0.34    0.39
   0  15  11   -0.01    0.43
   0  15  11    0.55    0.64
   0  15  11    0.28    0.50
   0 -15 -11    0.29    0.60
   0 -15  11    0.76    0.57
   0 -15 -11    0.67    0.58
   0 -15 -11   -0.34    0.52
   0 -15 -11    0.66    0.64
   0 -15  11    0.66    0.58
   0 -15  11    0.23    0.51
   0  15 -13    0.74    0.53
   0  15  13   -0.43    0.63
   0  15  13   -0.49    0.61
   0  15 -13    0.19    0.40
   0  15  13    0.34    0.46
   0 -15 -13    0.14    0.64
   0 -15 -13   -0.18    0.56
   0 -15 -13   -0.56    0.42
   0 -15  13   -0.27    0.60
   0 -15 -13   -0.13    0.39
   0 -15 -13    0.03    0.57
   0 -15  13   -0.40    0.45
   0  16   0   38.16    3.35
   0  16   0   39.54    3.36
   0  16   0   39.50    3.37
   0  16   0   42.06    3.39
   0  16   0   42.05    3.33
   0 -16   0   41.22    3.39
   0 -16   0   41.28    3.44
   0 -16   0   36.85    3.35
   0 -16   0   39.67    3.45
   0  16  -2    9.78    1.09
   0  16   2   12.52    1.23
   0  16   2   10.28    1.15
   0  16  -2   10.65    1.19
   0  16  -2   10.88    1.22
   0  16  -2   11.43    1.21
   0  16   2   12.04    1.22
   0  16   2   13.31    1.30
   0  16   2   13.11    1.27
   0 -16  -2   13.54    1.23
   0 -16   2    9.61    1.19
   0 -16   2   10.83    1.15
   0 -16  -2   11.94    1.32
   0 -16   2   10.28    1.29
   0 -16  -2   11.70    1.29
   0 -16   2   10.37    1.12
   0 -16   2    9.84    1.32
   0 -16  -2   11.46    1.24
   0  16   4    8.97    1.14
   0  16   4   10.58    1.20
   0  16  -4   10.60    1.21
   0  16   4   11.15    1.32
   0  16  -4    9.56    1.00
   0  16  -4   10.49    1.09
   0  16  -4    8.92    1.12
   0  16   4   10.19    1.15
   0  16   4    9.83    1.18
   0 -16   4   11.40    1.32
   0 -16  -4   10.80    1.31
   0 -16  -4   12.38    1.24
   0 -16   4   10.14    1.30
   0 -16  -4   12.08    1.22
   0 -16  -4   10.93    1.33
   0 -16   4   10.43    1.05
   0 -16   4   11.24    1.17
   0 -16   4    9.51    1.13
   0  16   6   11.19    1.19
   0  16  -6   11.21    1.12
   0  16   6   11.83    1.32
   0  16   6    9.57    1.23
   0  16   6   11.07    1.24
   0  16  -6   11.70    1.23
   0 -16   6    9.34    1.05
   0 -16  -6    8.00    1.03
   0 -16  -6   11.72    1.23
   0 -16   6    9.79    1.22
   0 -16  -6   12.28    1.26
   0 -16   6   12.65    1.32
   0 -16   6    9.81    1.19
   0 -16  -6    9.04    1.21
   0 -16  -6   10.85    1.28
   0 -16   6    8.64    1.05
   0  16   8    0.46    0.50
   0  16  -8    0.94    0.39
   0  16   8    1.90    0.65
   0  16   8    1.98    0.70
   0  16  -8    0.73    0.43
   0  16   8    1.82    0.70
   0  16  -8    1.51    0.54
   0 -16   8    1.01    0.37
   0 -16   8    1.67    0.64
   0 -16   8    0.92    0.61
   0 -16  -8    0.66    0.56
   0 -16  -8    1.22    0.76
   0 -16  -8    1.43    0.43
   0 -16   8    1.17    0.47
   0 -16  -8    1.26    0.65
   0 -16  -8    0.83    0.56
   0  16  10    1.88    0.55
   0  16  10    1.25    0.54
   0  16 -10    1.46    0.57
   0  16 -10    1.23    0.46
   0  16  10    3.21    0.79
   0  16  10    1.31    0.70
   0  16  10    1.72    0.62
   0 -16  10    1.20    0.63
   0 -16 -10    1.59    0.68
   0 -16 -10    2.06    0.71
   0 -16  10    1.97    0.57
   0 -16 -10    1.84    0.71
   0 -16 -10    3.02    0.58
   0 -16  10    1.75    0.67
   0  16  12    2.93    0.76
   0  16 -12    2.60    0.56
   0  16  12    2.40    0.73
   0  16  12    4.86    1.06
   0  16  12    2.35    0.68
   0  16 -12    3.17    0.68
   0 -16 -12    3.28    0.86
   0 -16  12    3.11    0.66
   0 -16 -12    2.92    0.80
   0 -16 -12    2.26    0.76
   0 -16 -12    2.77    0.56
   0  16 -14    0.53    0.77
   0  16  14    0.35    0.75
   0  16 -14    1.14    0.51
   0  16  14    1.57    0.70
   0  16  14    1.07    0.80
   0  16  14    1.54    0.69
   0 -16 -14    1.75    1.11
   0 -16  14    0.99    0.65
   0 -16 -14    1.48    0.56
   0 -16 -14    1.15    0.74
   0 -16  14    1.66    0.80
   0 -16 -14    0.59    0.48
   0  17   1   -0.27    0.43
   0  17  -1    0.28    0.45
   0  17   1   -0.41    0.44
   0  17   1    0.26    0.35
   0  17  -1    0.06    0.44
   0  17  -1   -0.25    0.41
   0  17   1    0.39    0.44
   0  17  -1    0.48    0.33
   0  17   1    0.29    0.48
   0  17  -1    0.48    0.45
   0 -17   1    0.22    0.38
   0 -17  -1    0.38    0.44
   0 -17   1    0.55    0.51
   0 -17  -1    0.66    0.46
   0 -17   1    0.13    0.50
   0 -17   1    0.07    0.38
   0 -17   1   -0.66    0.45
   0 -17  -1   -0.22    0.51
   0 -17  -1    0.23    0.52
   0  17   3    0.43    0.47
   0  17  -3   -0.48    0.44
   0  17   3   -0.30    0.40
   0  17  -3    0.05    0.41
   0  17  -3   -0.20    0.27
   0  17   3    0.24    0.53
   0  17   3   -0.44    0.49
   0  17   3   -0.30    0.36
   0  17  -3   -0.33    0.40
   0 -17  -3    1.43    0.63
   0 -17   3   -0.18    0.35
   0 -17  -3    0.25    0.45
   0 -17   3   -0.30    0.50
   0 -17  -3    0.51    0.48
   0 -17   3   -0.12    0.52
   0 -17   3    0.44    0.37
   0 -17   3    0.70    0.49
   0 -17  -3   -0.21    0.52
   0  17  -5   -0.39    0.32
   0  17   5   -0.26    0.47
   0  17  -5    0.33    0.40
   0  17   5   -0.26    0.51
   0  17   5   -0.26    0.41
   0  17  -5    0.52    0.49
   0  17   5    0.09    0.53
   0 -17   5   -0.14    0.53
   0 -17  -5   -0.07    0.37
   0 -17   5    0.44    0.35
   0 -17   5   -0.01    0.33
   0 -17  -5   -0.02    0.47
   0 -17   5   -0.01    0.44
   0 -17   5   -0.64    0.49
   0 -17  -5   -0.23    0.51
   0 -17  -5   -0.34    0.52
   0  17   7    0.30    0.47
   0  17   7    0.76    0.58
   0  17   7    0.02    0.49
   0  17  -7    0.14    0.38
   0  17   7    0.83    0.73
   0  17  -7    0.89    0.49
   0 -17  -7    0.48    0.41
   0 -17   7    0.54    0.61
   0 -17   7    0.82    0.49
   0 -17  -7    0.07    0.53
   0 -17  -7    0.09    0.50
   0 -17  -7    0.69    0.60
   0 -17  -7    0.59    0.59
   0 -17   7   -0.13    0.31
   0 -17   7    0.00    0.57
   0  17  -9    0.17    0.50
   0  17   9    0.41    0.50
   0  17   9    1.13    0.65
   0  17   9    0.59    0.48
   0 -17  -9   -0.06    0.54
   0 -17   9    0.37    0.46
   0 -17  -9    0.77    0.42
   0 -17   9    0.47    0.60
   0 -17  -9    0.64    0.60
   0 -17  -9    0.18    0.52
   0 -17  -9    1.01    0.66
   0 -17   9   -0.06    0.56
   0  17  11    0.56    0.50
   0  17  11    1.18    0.70
   0  17 -11    0.18    0.40
   0  17  11   -0.63    0.48
   0  17 -11   -0.87    0.47
   0 -17 -11    0.20    0.39
   0 -17  11    0.60    0.50
   0 -17  11   -0.12    0.56
   0 -17  11    0.31    0.58
   0 -17 -11   -0.81    0.50
   0 -17 -11    1.03    0.63
   0  17  13    0.13    0.48
   0  17  13   -0.51    0.66
   0  17  13    0.76    0.73
   0  17 -13    0.38    0.45
   0  17 -13   -0.54    0.50
   0  17  13    0.83    0.57
   0 -17 -13   -0.08    0.56
   0 -17  13   -0.16    0.49
   0 -17 -13   -0.02    0.41
   0 -17  13   -0.06    1.26
   0 -17 -13   -0.29    0.63
   0  18   0    1.00    0.51
   0  18   0    1.61    0.45
   0  18   0    0.28    0.50
   0  18   0    1.15    0.53
   0  18   0    2.06    0.55
   0 -18   0    1.92    0.53
   0 -18   0    0.86    0.60
   0 -18   0    1.59    0.53
   0 -18   0    1.77    0.65
   0  18   2   37.89    3.50
   0  18   2   41.31    3.48
   0  18  -2   41.73    3.48
   0  18  -2   43.63    3.43
   0  18  -2   43.65    3.51
   0  18   2   41.10    3.53
   0  18   2   42.92    3.49
   0  18  -2   41.56    3.48
   0  18   2   41.90    3.49
   0 -18  -2   41.72    3.58
   0 -18   2   38.75    3.46
   0 -18  -2   38.85    3.49
   0 -18   2   40.70    3.59
   0 -18   2   42.50    3.49
   0 -18  -2   38.09    3.57
   0 -18   2   38.26    3.57
   0 -18   2   41.75    3.45
   0 -18  -2   43.41    3.51
   0  18   4    9.12    1.14
   0  18  -4    9.92    1.00
   0  18   4    8.35    1.04
   0  18  -4    6.86    0.94
   0  18   4    8.30    1.07
   0  18  -4   12.48    1.17
   0  18  -4    8.21    0.90
   0  18   4    8.36    1.10
   0  18   4    7.94    0.98
   0 -18  -4    7.14    1.10
   0 -18   4    9.45    1.15
   0 -18   4    8.96    1.15
   0 -18  -4    8.85    1.05
   0 -18   4    8.35    1.06
   0 -18  -4    8.68    1.09
   0 -18  -4    7.86    1.15
   0 -18   4    9.56    1.00
   0 -18   4    8.64    1.07
   0  18  -6   28.30    2.34
   0  18  -6   29.86    2.42
   0  18   6   26.99    2.43
   0  18   6   26.33    2.43
   0 -18   6   29.19    2.50
   0 -18  -6   24.80    2.50
   0 -18   6   28.15    2.55
   0 -18   6   27.12    2.28
   0 -18  -6   25.95    2.35
   0 -18   6   27.74    2.38
   0 -18  -6   25.15    2.41
   0 -18  -6   23.20    2.49
   0 -18  -6   26.63    2.49
   0 -18   6   23.77    2.29
   0  18   8   21.13    2.02
   0  18   8   17.37    2.02
   0  18   8   20.95    2.00
   0  18  -8   18.66    1.76
   0  18  -8   20.60    1.94
   0 -18  -8   20.50    1.82
   0 -18   8   21.30    1.98
   0 -18   8   20.88    2.02
   0 -18  -8   21.65    2.82
   0 -18  -8   17.29    1.95
   0 -18   8   17.44    1.84
   0 -18   8   17.56    1.73
   0 -18  -8   18.20    1.95
   0 -18  -8   21.74    2.01
   0  18 -10    2.84    0.82
   0  18  10    1.03    0.53
   0  18  10    1.60    0.74
   0  18  10    1.74    0.66
   0  18  10    1.76    0.68
   0  18  10    1.96    0.58
   0 -18  10    1.20    0.67
   0 -18 -10    2.21    0.72
   0 -18 -10    1.53    0.62
   0 -18  10    2.40    0.76
   0 -18  10    0.67    0.49
   0 -18 -10    0.67    0.68
   0 -18 -10    1.46    0.49
   0 -18 -10    1.87    0.71
   0  18  12    0.77    0.57
   0  18  12    1.62    0.77
   0  18  12    0.52    0.53
   0  18  12    0.63    0.74
   0  18  12    1.56    0.74
   0  18 -12    0.80    0.62
   0 -18 -12    1.79    0.75
   0 -18  12    0.90    0.70
   0 -18 -12    0.31    0.64
   0 -18 -12    1.76    0.78
   0 -18 -12    0.37    0.47
   0 -18  12    1.26    0.82
   0 -18  12    0.72    0.59
   0  19   1   -0.05    0.38
   0  19  -1    0.32    0.49
   0  19   1   -0.41    0.47
   0  19  -1    0.57    0.49
   0  19   1   -0.15    0.47
   0  19   1   -0.35    0.49
   0  19  -1    0.99    0.53
   0  19  -1    0.30    0.37
   0  19   1    0.27    0.46
   0 -19   1   -0.58    0.50
   0 -19  -1   -0.27    0.50
   0 -19   1   -0.39    0.39
   0 -19  -1   -0.39    0.44
   0 -19   1   -0.67    0.42
   0 -19  -1    0.15    0.46
   0 -19   1   -0.31    0.51
   0 -19  -1   -0.48    0.56
   0  19  -3    0.28    0.42
   0  19  -3    0.37    0.46
   0  19   3    0.69    0.49
   0  19   3   -0.07    0.43
   0  19  -3    0.10    0.32
   0  19  -3   -0.32    0.48
   0  19   3   -0.42    0.52
   0  19   3    0.02    0.43
   0  19   3    0.30    0.50
   0 -19   3   -0.12    0.39
   0 -19  -3   -0.33    0.54
   0 -19  -3    0.29    0.46
   0 -19  -3    0.66    0.52
   0 -19   3    0.02    0.41
   0 -19   3   -0.55    0.53
   0 -19  -3   -0.15    0.56
   0 -19   3   -0.65    0.51
   0 -19   3   -0.24    0.38
   0  19   5   -1.01    0.66
   0  19  -5   -0.13    0.56
   0  19   5   -0.51    0.53
   0  19  -5    0.11    0.61
   0  19   5   -0.04    0.44
   0  19  -5   -0.57    0.39
   0  19   5   -0.50    0.62
   0 -19   5   -0.72    0.35
   0 -19   5   -0.24    0.39
   0 -19  -5   -0.38    0.63
   0 -19   5   -0.08    0.48
   0 -19  -5   -0.03    0.78
   0 -19  -5    0.16    0.51
   0 -19   5    0.08    0.60
   0 -19  -5   -0.46    0.58
   0 -19   5    0.55    0.63
   0  19   7    0.31    0.63
   0  19   7    0.38    0.51
   0  19  -7   -0.19    0.38
   0  19   7   -0.10    0.52
   0  19   7    0.88    0.62
   0 -19  -7   -0.11    0.55
   0 -19  -7    0.05    0.55
   0 -19  -7    0.46    0.51
   0 -19  -7    1.31    0.67
   0 -19  -7   -0.07    0.41
   0 -19   7   -0.92    0.53
   0 -19   7    0.19    0.46
   0 -19   7    0.40    0.70
   0 -19   7   -0.18    0.33
   0  19  -9    0.96    0.58
   0  19   9   -0.39    0.61
   0  19  -9    0.13    0.40
   0  19   9    0.49    0.60
   0  19   9    0.55    0.58
   0  19   9    0.97    0.54
   0 -19  -9   -0.51    0.53
   0 -19  -9    0.13    0.58
   0 -19   9    0.93    0.70
   0 -19   9    0.35    0.67
   0 -19  -9   -0.05    0.54
   0 -19  -9   -0.69    0.52
   0 -19  -9   -0.52    0.36
   0 -19   9   -0.06    0.46
   0  19  11    0.00    0.51
   0  19  11    0.38    0.56
   0  19  11    0.72    0.50
   0  19  11    0.18    0.66
   0  19 -11    0.18    0.56
   0  19  11   -0.37    0.68
   0 -19  11    0.17    0.59
   0 -19  11    0.21    0.75
   0 -19 -11    0.18    0.61
   0 -19  11   -0.06    0.63
   0 -19 -11    0.27    0.62
   0 -19 -11    0.11    0.44
   0  20   0   27.04    2.60
   0  20   0   26.40    2.29
   0  20   0   25.14    2.21
   0  20   0   24.18    2.31
   0 -20   0   23.97    2.24
   0 -20   0   26.80    2.61
   0 -20   0   22.78    2.65
   0 -20   0   22.73    2.25
   0  20   2   45.82    4.17
   0  20  -2   52.33    4.11
   0  20   2   51.19    4.23
   0  20   2   47.03    4.43
   0  20   2   51.22    4.17
   0  20  -2   50.28    4.16
   0  20  -2   49.83    4.16
   0 -20   2   51.15    4.15
   0 -20  -2   48.87    4.34
   0 -20  -2   48.66    4.19
   0 -20   2   51.21    4.30
   0 -20   2   49.42    4.15
   0 -20  -2   44.06    4.15
   0 -20   2   51.89    4.14
   0  20   4    4.20    0.83
   0  20   4    3.53    0.71
   0  20  -4    2.41    0.61
   0  20  -4    2.14    0.54
   0  20   4    3.45    0.72
   0  20  -4    1.64    0.45
   0  20  -4    3.44    0.75
   0  20   4    2.56    0.68
   0  20   4    2.59    0.92
   0 -20  -4    3.94    0.87
   0 -20  -4    4.23    0.83
   0 -20   4    3.00    0.57
   0 -20   4    2.87    0.59
   0 -20   4    2.54    0.58
   0  20   6    2.48    0.68
   0  20   6    3.49    0.75
   0  20   6    1.67    0.78
   0  20  -6    2.35    0.59
   0  20   6    1.51    0.64
   0  20  -6    4.47    0.79
   0 -20  -6    3.30    1.01
   0 -20  -6    4.51    0.83
   0 -20   6    3.07    0.67
   0 -20  -6    2.67    0.58
   0 -20   6    2.45    0.52
   0 -20   6    2.45    0.79
   0 -20  -6    2.54    0.78
   0 -20   6    4.00    0.59
   0 -20   6    3.48    0.83
   0  20   8    0.72    0.61
   0  20  -8    0.64    0.61
   0  20   8   -0.23    0.51
   0  20  -8    0.21    0.40
   0  20   8    0.96    0.68
   0  20   8    0.64    0.55
   0 -20  -8    0.39    0.58
   0 -20   8    0.85    0.39
   0 -20   8    1.26    0.71
   0 -20   8    0.33    0.63
   0 -20  -8    0.72    0.55
   0 -20   8   -0.24    0.44
   0 -20  -8    0.73    0.66
   0 -20  -8    0.80    0.44
   0  20 -10    0.34    0.62
   0  20  10    1.14    0.71
   0  20  10    0.07    0.49
   0  20  10    0.05    0.53
   0  20  10   -0.60    0.62
   0  20  10   -0.73    0.51
   0 -20  10    0.33    0.82
   0 -20 -10    0.27    0.43
   0 -20 -10   -0.44    0.60
   0 -20  10   -0.17    0.66
   0 -20 -10    1.00    0.62
   0 -20  10    0.64    0.67
   0 -20 -10    0.44    0.66
   0  21  -1    0.78    0.54
   0  21  -1   -0.15    0.39
   0  21   1    0.59    0.59
   0  21  -1   -0.31    0.51
   0  21   1    0.67    0.52
   0  21   1    0.04    0.42
   0  21   1    0.24    0.54
   0  21  -1    0.06    0.49
   0 -21  -1    0.11    0.61
   0 -21   1    0.89    0.65
   0 -21  -1   -0.80    0.59
   0 -21  -1    0.13    0.47
   0 -21   1    0.93    0.51
   0 -21   1    0.06    0.43
   0 -21  -1   -0.06    0.49
   0 -21   1   -0.07    0.63
   0  21   3    0.13    0.53
   0  21   3   -0.10    0.45
   0  21  -3    1.31    0.59
   0  21   3   -0.21    0.57
   0  21  -3    0.00    0.35
   0  21   3   -0.11    0.45
   0  21   3    0.28    0.56
   0  21  -3    0.61    0.48
   0  21  -3   -0.28    0.52
   0 -21  -3    0.08    0.62
   0 -21   3   -0.29    0.37
   0 -21  -3    0.66    0.52
   0 -21  -3   -0.18    0.62
   0 -21   3   -0.16    0.65
   0 -21   3    0.20    0.42
   0 -21   3    0.45    0.54
   0 -21   3   -0.10    0.60
   0  21   5    0.41    0.56
   0  21   5    0.91    0.58
   0  21   5    0.42    0.66
   0  21  -5    0.41    0.43
   0  21   5   -0.09    0.47
   0  21  -5    2.28    0.62
   0 -21   5   -0.16    0.64
   0 -21   5   -0.02    0.46
   0 -21  -5    0.57    0.57
   0 -21   5   -0.01    0.39
   0 -21   5   -0.02    0.61
   0 -21  -5   -0.68    0.38
   0 -21   5   -0.32    0.38
   0 -21  -5    1.39    0.69
   0 -21  -5   -0.43    0.61
   0  21  -7    0.37    0.50
   0  21   7    0.05    0.54
   0  21   7    0.15    0.57
   0  21   7   -0.08    0.54
   0  21  -7    0.14    0.60
   0 -21   7   -0.33    0.61
   0 -21  -7    0.43    0.66
   0 -21  -7   -0.39    0.40
   0 -21   7   -0.15    0.38
   0 -21  -7   -0.45    0.54
   0 -21   7   -0.12    0.67
   0 -21   7   -0.06    0.36
   0 -21   7    0.14    0.49
   0 -21  -7   -0.05    0.61
   0  21   9    0.16    0.58
   0  21   9    0.06    0.52
   0  21   9   -0.22    0.65
   0  21  -9   -0.04    0.43
   0  21   9    0.42    0.68
   0 -21  -9    0.73    0.64
   0 -21  -9    0.84    0.69
   0 -21  -9    0.51    0.73
   0 -21  -9    0.73    0.48
   0 -21   9   -0.45    0.64
   0 -21   9    0.29    0.51
   0 -21  -9    0.09    0.54
   0 -21   9   -0.15    0.67
   0  22   0    1.38    0.58
   0  22   0    0.93    0.48
   0  22   0    1.42    0.61
   0  22   0    0.95    0.58
   0 -22   0    0.34    0.63
   0 -22   0    1.64    0.56
   0 -22   0    0.98    0.68
   0  22  -2    0.65    0.41
   0  22  -2    0.58    0.52
   0  22   2   -0.22    0.57
   0  22   2    0.19    0.47
   0  22   2   -0.72    0.45
   0  22  -2    0.31    0.57
   0  22  -2    0.39    0.51
   0  22   2    0.63    0.54
   0 -22   2    0.28    0.47
   0 -22  -2   -0.37    0.61
   0 -22   2    0.58    0.65
   0 -22   2   -0.10    0.66
   0 -22  -2    1.09    0.71
   0 -22  -2    1.12    0.53
   0  22   4    0.21    0.54
   0  22  -4   -0.07    0.35
   0  22   4    0.77    0.62
   0  22   4    0.32    0.63
   0  22   4   -0.42    0.47
   0  22  -4    0.10    0.51
   0  22  -4    0.71    0.50
   0  22  -4    0.23    0.58
   0  22   4    1.15    0.53
   0 -22  -4    0.81    0.70
   0 -22   4   -0.23    0.37
   0 -22  -4    0.71    0.63
   0 -22  -4   -0.02    0.52
   0 -22  -4    0.66    0.51
   0 -22   4    0.10    0.46
   0 -22   4    1.32    0.72
   0 -22   4   -0.06    0.64
   0 -22   4    0.45    0.43
   0  22  -6    4.22    0.81
   0  22  -6    3.03    0.63
   0  22   6    4.17    0.85
   0  22  -6    2.16    0.53
   0  22   6    3.70    0.89
   0  22   6    5.20    0.85
   0  22   6    3.45    0.75
   0 -22  -6    2.27    0.76
   0 -22  -6    3.41    0.93
   0 -22   6    3.95    0.92
   0 -22   6    5.09    1.06
   0 -22   6    3.72    0.63
   0 -22   6    2.71    0.59
   0 -22   6    3.32    0.89
   0 -22  -6    3.88    0.88
   0  22  -8    0.23    0.46
   0  22   8   -0.07    0.66
   0  22   8    0.59    0.58
   0  22  -8    0.45    0.62
   0  22   8    0.11    0.57
   0  22   8    0.03    0.65
   0 -22   8    0.91    0.45
   0 -22  -8    0.41    0.63
   0 -22   8    0.53    0.51
   0 -22   8    0.44    0.69
   0 -22   8    0.98    0.74
   0 -22  -8    0.17    0.71
   0 -22  -8    0.57    0.65
   0 -22  -8    1.22    0.56
   0 -22  -8   -0.20    0.40
   0 -22  10    0.61    0.56
   0 -22 -10    0.53    0.64
   0  23   1    0.34    0.58
   0  23   1    0.11    0.44
   0  23  -1   -0.22    0.50
   0  23   1   -0.01    0.52
   0  23  -1    0.28    0.50
   0  23  -1   -0.26    0.39
   0  23   1   -1.19    0.46
   0 -23  -1   -0.32    0.48
   0 -23   1    0.69    0.50
   0 -23  -1    0.49    0.70
   0 -23   1    0.77    0.66
   0 -23   1   -0.44    0.60
   0 -23  -1   -0.41    0.60
   0  23  -3    0.15    0.56
   0  23  -3    0.35    0.49
   0  23   3    0.42    0.62
   0  23  -3   -0.48    0.47
   0  23   3   -0.04    0.44
   0  23   3    1.10    0.58
   0  23   3   -0.42    0.43
   0  23  -3    0.31    0.39
   0 -23   3   -0.18    0.64
   0 -23   3   -0.12    0.43
   0 -23   3   -0.68    0.61
   0 -23  -3    0.61    0.52
   0 -23   3   -0.13    0.45
   0 -23  -3   -0.07    0.63
   0 -23  -3   -0.54    0.49
   0 -23  -3    0.16    0.63
   0  23   5    0.10    0.55
   0  23  -5    0.82    0.61
   0  23   5    0.82    0.67
   0  23  -5    0.29    0.46
   0  23  -5    0.28    0.50
   0 -23  -5   -0.19    0.38
   0 -23   5    0.26    0.43
   0 -23   5    0.84    0.50
   0 -23   5   -0.22    0.65
   0 -23  -5   -0.02    0.56
   0 -23  -5   -0.24    0.68
   0 -23  -5    0.77    0.72
   0 -23   5    0.29    0.44
   0 -23   5   -1.19    1.06
   0  23  -7   -0.32    0.44
   0  23   7   -0.40    0.54
   0  23   7    0.52    0.59
   0  23  -7    0.22    0.62
   0  23   7    0.65    0.70
   0 -23  -7    1.25    0.79
   0 -23   7    0.01    0.41
   0 -23   7    0.30    0.71
   0 -23  -7    0.02    0.46
   0 -23  -7   -0.09    0.67
   0 -23   7   -0.06    0.40
   0 -23   7   -0.66    0.65
   0 -23  -7    1.17    0.69
   0 -23   7    0.36    0.50
   0 -23   9   -0.39    0.52
   0 -23  -9    0.36    0.60
   0 -23   9    0.16    0.46
   0  24   0    0.45    0.57
   0  24   0    0.11    0.44
   0  24   0    1.31    0.61
   0 -24   0   -0.54    0.49
   0 -24   0   -0.03    0.48
   0 -24   0    0.95    0.68
   0  24   2    1.99    0.66
   0  24  -2    3.73    0.73
   0  24   2    2.15    0.77
   0  24   2    2.07    0.64
   0  24  -2    3.09    0.68
   0  24  -2    1.98    0.65
   0  24   2    1.30    0.62
   0  24  -2    2.17    0.55
   0 -24  -2    1.44    0.80
   0 -24  -2    2.26    0.85
   0 -24  -2    2.99    0.67
   0 -24   2    2.82    0.81
   0 -24  -2    3.66    0.76
   0 -24   2    2.48    0.88
   0 -24   2    3.57    0.69
   0  24   4    4.85    0.91
   0  24   4    6.64    1.05
   0  24   4    5.49    0.91
   0  24  -4    5.59    0.80
   0  24  -4    4.49    0.68
   0 -24  -4    3.80    0.98
   0 -24  -4    4.51    0.80
   0 -24   4    5.72    0.88
   0 -24  -4    4.67    0.90
   0 -24   4    6.01    1.09
   0 -24   4    4.48    0.78
   0 -24   4    6.21    1.09
   0  24  -6    0.71    0.65
   0  24  -6   -0.35    0.43
   0  24   6    0.31    0.56
   0  24   6    0.55    0.63
   0  24   6    0.24    0.76
   0  24  -6   -0.02    0.49
   0 -24   6    0.57    0.74
   0 -24  -6    0.52    0.64
   0 -24   6   -0.08    0.68
   0 -24  -6   -0.14    0.70
   0 -24   6    0.51    0.52
   0 -24   6    0.22    0.45
   0 -24  -6   -0.28    0.71
   0 -24   6    0.45    0.45
   0  25   1    0.09    0.52
   0  25  -1    0.14    0.53
   0  25   1   -0.41    0.44
   0  25  -1   -0.18    0.54
   0  25  -1   -0.11    0.43
   0  25  -1    0.54    0.58
   0  25   1   -0.84    0.48
   0 -25  -1    0.29    0.71
   0 -25   1   -0.78    0.63
   0 -25  -1    0.05    0.51
   0 -25   1    0.17    0.53
   0 -25   1    0.07    0.69
   0 -25   1    0.17    0.49
   0 -25  -1    0.77    0.58
   0  25  -3   -0.40    0.56
   0  25  -3    0.34    0.42
   0  25   3    0.20    0.65
   0  25  -3   -0.73    0.48
   0  25   3    0.14    0.52
   0  25  -3    0.16    0.53
   0  25   3   -0.02    0.50
   0  25   3   -0.25    0.55
   0 -25   3    0.17    0.55
   0 -25   3    0.45    0.53
   0 -25   3   -0.85    0.68
   0 -25  -3   -0.93    0.62
   0 -25   3   -0.83    0.66
   0 -25  -3    0.56    0.72
   0 -25  -3   -0.13    0.54
   0 -25  -3    0.59    0.53
   0  25   5    0.15    0.54
   0  25  -5    0.23    0.46
   0  25  -5   -0.53    0.49
   0  25   5   -1.06    0.50
   0 -25   5   -0.40    0.68
   0 -25  -5   -0.79    0.53
   0 -25  -5   -0.24    0.77
   0 -25   5   -0.03    0.56
   0 -25  -5   -0.21    0.43
   0 -25   5   -0.06    0.48
   0  26   0    0.47    0.58
   0  26   0    0.74    0.54
   0  26   0    0.23    0.61
   0 -26   0    0.47    0.75
   0 -26   0    0.31    0.53
   0 -26   0    0.15    0.57
   0 -26   0    0.47    0.75
   0  26   2    6.22    1.00
   0  26  -2    9.75    1.06
   0  26  -2    6.27    1.04
   0  26   2    7.20    1.02
   0  26  -2    5.83    0.99
   0  26   2    6.53    1.02
   0 -26   2    5.14    1.25
   0 -26  -2    5.97    1.20
   0 -26   2    6.71    1.23
   0 -26  -2    9.36    1.15
   0 -26   2    6.92    1.03
   0 -26  -2    5.35    1.18
   0 -26   2    9.91    1.14
   0 -26  -2    5.94    1.01
   0 -26   4    3.70    0.77
   1   0 -16    0.93    0.73
   1   0 -16    0.28    0.50
  -1   0  16    0.01    0.42
  -1   0  16    0.01    0.40
  -1   0  16    0.39    0.40
  -1   0  16   -0.27    0.45
  -1   0  14    0.94    0.51
  -1   0  14    0.12    0.37
  -1   0  14   -0.08    0.38
   1   0 -14    0.66    0.48
  -1   0  14   -0.53    0.35
   1   0 -14    0.25    0.35
   1   0 -14    0.50    0.89
   1   0 -12    0.05    0.31
  -1   0  12    0.74    0.68
   1   0 -12    1.02    0.53
   1   0 -12    1.57    0.60
  -1   0  12   -0.06    0.33
  -1   0  12    0.28    0.34
  -1   0  12    0.55    0.43
  -1   0  10   -0.18    0.30
  -1   0  10    0.42    0.24
  -1   0  10    1.03    0.41
  -1   0  10    0.73    0.32
   1   0 -10    0.89    0.46
  -1   0  10    0.46    0.30
   1   0 -10    0.36    0.26
   1   0 -10    0.49    0.28
   1   0 -10    1.34    0.41
  -1   0   8    0.25    0.30
  -1   0   8    0.31    0.20
   1   0  -8    0.11    0.34
  -1   0   8    0.56    0.25
   1   0  -8    1.46    0.26
  -1   0   8   -0.19    0.20
   1   0  -8    0.22    0.22
  -1   0   6    0.51    0.30
  -1   0   6   -0.44    0.26
   1   0  -6    0.73    0.36
   1   0  -6    0.56    0.24
  -1   0   6    0.61    0.26
   1   0  -6   -0.36    0.44
  -1   0   6   -0.19    0.26
  -1   0   6    0.02    0.19
  -1   0   6    0.56    0.28
   1   0  -6    1.16    0.33
   1   0  -6    0.13    0.21
   1   0  -6    0.03    0.22
  -1   0   6   -0.08    0.25
   1   0  -4   13.22    1.27
  -1   0   4   15.69    1.31
   1   0  -4   16.18    1.31
  -1   0   4   16.18    1.28
  -1   0   4   11.42    1.27
  -1   0   2   -0.34    0.14
   1   0  -2   -0.09    0.19
  -1   0   2   -0.08    0.13
  -1   0   2   -0.17    0.12
   1   0  -2   -0.27    0.11
   1   0  -2   -0.15    0.14
  -1   0   2   -0.43    0.10
   1   0  -2   -0.21    0.13
  -1   0   2   -0.33    0.12
   1   0  -2   -0.12    0.12
  -1   0   2   -0.11    0.14
  -1   0   2   -0.49    0.20
  -1   0   2   -0.28    0.17
   1   0  -2   -0.24    0.13
   1   0   2    0.34    0.19
   1   0   2    0.23    0.14
  -1   0  -2    0.08    0.17
  -1   0  -2   -0.16    0.12
   1   0   2   -0.06    0.14
   1   0   2    0.08    0.12
  -1   0  -2    0.13    0.15
  -1   0  -2    0.00    0.12
  -1   0  -4   18.41    1.65
   1   0   6    7.83    0.74
   1   0   6    5.73    0.69
   1   0  10    0.92    0.31
   1   0  10    0.77    0.30
  -1   0 -10    1.00    0.38
   1   0  10    0.72    0.36
   1   0  12    0.50    0.33
   1   0  12    0.50    0.44
  -1   0 -12    1.57    0.60
  -1   0 -12    0.74    0.51
   1   0  12    0.34    0.34
  -1   0 -12    0.66    0.43
   1   0  12    0.23    0.33
   1   0  14    0.44    0.48
   1   0  14    0.57    0.37
   1   0  14    0.04    0.38
  -1   0 -14    0.66    0.47
   1   0  14    0.18    0.33
   1   0  16    0.14    0.40
   1   0  16   -0.39    0.35
   1   0  16   -0.24    0.47
  -1   0 -16   -0.22    0.47
   1   0  16    0.03    0.37
  -1   0 -16    0.40    0.68
  -1   1  17    0.79    0.55
  -1   1  17    0.64    0.56
   1   1 -17   -0.11    0.53
  -1   1  17    0.26    0.47
   1  -1 -17   -0.36    0.69
  -1  -1  17    0.30    0.44
  -1  -1  17    0.15    0.46
  -1  -1  17   -0.07    0.54
  -1  -1  17    0.22    0.43
  -1   1  15    0.62    0.44
  -1   1  15    0.27    0.39
   1   1 -15    0.25    0.65
  -1   1  15   -0.22    0.37
  -1   1  15    0.33    0.49
   1   1 -15    0.89    0.53
   1   1 -15    0.65    0.40
  -1  -1  15    0.76    0.39
  -1  -1  15    0.46    0.57
   1  -1 -15    0.57    0.51
  -1  -1  15    0.33    0.40
   1  -1 -15   -0.07    0.35
   1  -1 -15    1.54    0.73
  -1  -1  15    0.34    0.48
  -1   1  13    0.30    0.38
  -1   1  13    0.37    0.39
   1   1 -13   -0.39    0.55
  -1   1  13    0.30    0.35
   1   1 -13    0.48    0.43
   1   1 -13    0.24    0.33
  -1   1  13   -0.54    0.41
   1  -1 -13    0.33    0.58
  -1  -1  13    0.84    0.37
  -1  -1  13   -0.14    0.34
  -1  -1  13    0.82    0.48
   1  -1 -13   -0.40    0.42
  -1   1  11    2.99    0.50
  -1   1  11    2.47    0.54
   1   1 -11    2.76    0.52
   1   1 -11    2.48    0.42
   1   1 -11    2.43    0.41
  -1   1  11    2.87    0.52
  -1   1  11    2.90    0.49
   1   1 -11    2.67    0.63
  -1  -1  11    2.57    0.53
   1  -1 -11    2.29    0.41
  -1  -1  11    2.17    0.44
  -1  -1  11    2.26    0.44
  -1  -1  11    2.20    0.47
   1  -1 -11    3.06    0.65
   1  -1 -11    2.44    0.40
   1  -1 -11    2.84    0.56
  -1   1   9    9.57    1.01
   1   1  -9    9.39    0.97
   1   1  -9    9.39    0.90
   1   1  -9   10.84    1.08
  -1   1   9    8.81    0.93
  -1   1   9    9.40    0.95
   1   1  -9   10.69    0.90
  -1   1   9    8.73    0.92
  -1   1   9   10.08    0.94
  -1  -1   9    8.70    0.98
  -1  -1   9    7.10    0.84
   1  -1  -9   10.26    0.90
   1  -1  -9   10.28    0.99
  -1  -1   9    9.05    0.91
  -1  -1   9    8.24    0.91
  -1  -1   9   10.58    0.95
   1  -1  -9   11.60    1.11
   1  -1  -9    9.25    0.89
  -1   1   7    3.02    0.41
   1   1  -7    0.97    0.33
  -1   1   7    2.32    0.39
  -1   1   7    1.92    0.47
   1   1  -7    2.49    0.52
  -1   1   7    2.46    0.38
  -1   1   7    2.48    0.34
   1   1  -7    1.81    0.34
  -1   1   7    2.61    0.34
   1   1  -7    1.95    0.38
   1  -1  -7    3.85    0.54
  -1  -1   7    3.34    0.46
   1  -1  -7    2.78    0.39
  -1  -1   7    1.45    0.35
  -1  -1   7    1.89    0.40
   1  -1  -7    2.24    0.35
   1  -1  -7    1.57    0.37
  -1  -1   7    2.34    0.40
   1  -1  -7    1.94    0.36
  -1  -1   7    2.41    0.35
   1   1  -5   37.17    3.10
  -1   1   5   45.42    3.16
   1   1  -5   35.96    3.12
  -1   1   5   43.90    3.11
  -1   1   5   40.10    3.09
   1   1  -5   39.32    3.10
   1   1  -5   38.58    3.09
  -1   1   5   39.50    3.16
  -1   1   5   43.52    3.14
  -1   1   5   41.34    3.14
   1   1  -5   37.54    3.15
   1   1  -5   38.46    3.11
   1   1  -5   35.51    3.12
  -1   1   5   39.16    3.09
  -1  -1   5   38.96    3.13
  -1  -1   5   36.75    3.10
  -1  -1   5   37.63    3.12
  -1  -1   5   34.64    3.09
   1  -1  -5   43.68    3.16
   1  -1  -5   35.90    3.14
  -1  -1   5   34.76    3.14
   1  -1  -5   40.47    3.13
   1  -1  -5   36.02    3.09
  -1  -1   5   35.26    3.10
   1  -1  -5   41.46    3.11
  -1  -1   5   34.49    3.08
   1  -1  -5   37.79    3.09
  -1  -1   5   37.26    3.11
  -1  -1   5   36.48    3.09
  -1   1   3   85.66    7.06
  -1   1   3   91.73    7.06
   1   1  -3   89.15    7.05
   1   1  -3   94.91    7.04
  -1   1   3   82.98    7.06
   1   1  -3   89.37    7.05
  -1   1   3   83.57    7.05
  -1   1   3   87.69    7.05
  -1   1   3   86.04    7.04
   1   1  -3   92.79    7.07
   1   1  -3   94.38    7.04
   1   1  -3   94.18    7.06
  -1   1   3   87.89    7.06
   1   1  -3   89.19    7.06
   1   1  -3   87.17    7.05
  -1   1   3   89.01    7.07
  -1  -1   3   89.62    7.07
   1  -1  -3   80.50    7.06
   1  -1  -3   90.32    7.04
  -1  -1   3   95.83    7.06
  -1  -1   3   89.14    7.04
   1  -1  -3   83.34    7.05
  -1  -1   3   86.76    7.05
  -1  -1   3   87.34    7.05
   1  -1  -3   90.43    7.04
   1  -1  -3   85.58    7.06
  -1  -1   3   91.40    7.06
  -1  -1   3   91.75    7.04
   1  -1  -3   89.82    7.05
   1  -1  -3   81.91    7.06
  -1  -1   3   87.98    7.04
  -1  -1   3   92.13    7.05
  -1   1   1    8.09    0.73
  -1   1   1    8.42    0.72
   1  -1  -1    9.85    0.77
  -1  -1   1    8.43    0.72
   1   1   1    7.95    0.65
   1  -1   1    8.05    0.61
   1  -1   1    6.18    0.63
   1   1   3   78.31    6.51
   1   1   3   81.96    6.50
   1   1   3   81.33    6.50
   1   1   3   76.69    6.51
  -1   1  -3   80.77    6.48
   1   1   3   70.71    6.48
  -1   1  -3   86.62    6.51
   1   1   3   80.04    6.51
  -1   1  -3   87.75    6.50
   1  -1   3   92.41    6.52
   1  -1   3   89.42    6.49
   1  -1   3   86.67    6.48
  -1  -1  -3   83.02    6.51
  -1  -1  -3   75.20    6.48
  -1  -1  -3   74.26    6.51
   1  -1   3   78.83    6.50
  -1  -1  -3   82.46    6.50
  -1  -1  -3   81.08    6.50
   1  -1   3   86.08    6.48
  -1   1  -5   35.68    2.99
   1   1   5   38.29    3.01
   1   1   5   42.99    3.04
  -1   1  -5   35.65    2.98
   1   1   5   35.84    3.00
   1   1   5   37.81    3.02
   1   1   5   36.03    2.99
  -1   1  -5   35.69    3.04
   1   1   5   37.59    3.00
  -1   1  -5   35.12    3.04
   1  -1   5   38.08    2.99
  -1  -1  -5   36.04    3.00
   1  -1   5   32.18    3.16
  -1  -1  -5   41.12    3.03
   1  -1   5   36.45    3.00
   1  -1   5   35.62    2.98
   1  -1   5   33.36    3.02
  -1  -1  -5   38.67    3.00
  -1  -1  -5   37.74    3.01
  -1  -1  -5   41.73    3.06
   1  -1   5   36.20    2.97
   1   1   7    2.27    0.39
  -1   1  -7    1.67    0.39
  -1   1  -7    1.78    0.51
  -1   1  -7    1.76    0.44
   1   1   7    3.32    0.41
  -1   1  -7    1.65    0.67
   1   1   7    3.28    0.43
   1   1   7    3.08    0.48
  -1  -1  -7    2.92    0.49
  -1  -1  -7    3.31    0.43
  -1  -1  -7    3.79    0.55
   1  -1   7    2.52    0.45
   1  -1   7    2.30    0.35
  -1  -1  -7    2.35    0.37
   1   1   9    9.85    0.90
  -1   1  -9    8.13    1.02
  -1   1  -9    9.81    1.01
  -1   1  -9    8.18    0.84
  -1   1  -9    8.31    0.90
   1   1   9    9.45    0.96
   1   1   9    8.95    0.89
   1   1   9    8.88    0.85
   1   1   9    8.06    0.88
   1   1   9    8.64    0.87
   1  -1   9    9.82    0.95
  -1  -1  -9   10.08    1.03
   1  -1   9    8.79    0.94
  -1  -1  -9    9.59    1.06
  -1  -1  -9    7.69    0.86
  -1  -1  -9    9.63    0.93
   1  -1   9    6.17    0.92
   1  -1   9    8.82    0.85
   1   1  11    2.61    0.57
   1   1  11    2.66    0.42
   1   1  11    1.74    0.42
  -1   1 -11    2.34    0.49
  -1   1 -11    2.63    0.59
  -1   1 -11    2.35    0.56
   1   1  11    1.76    0.44
   1   1  11    3.28    0.55
   1  -1  11    2.41    0.43
   1  -1  11    2.56    0.43
   1  -1  11    3.13    0.52
  -1  -1 -11    2.44    0.50
  -1  -1 -11    1.32    0.53
   1  -1  11    1.89    0.45
  -1  -1 -11    2.01    0.62
  -1   1 -13   -0.03    0.56
  -1   1 -13   -0.16    0.49
   1   1  13    0.18    0.45
   1   1  13    0.61    0.38
  -1   1 -13   -0.42    0.39
   1   1  13    0.17    0.33
   1   1  13    0.27    0.34
  -1  -1 -13    0.47    0.57
   1  -1  13   -0.06    0.32
   1  -1  13    0.28    0.34
   1  -1  13   -0.12    0.33
   1  -1  13    0.17    0.42
  -1  -1 -13    0.17    0.43
  -1   1 -15    0.13    0.64
   1   1  15   -0.43    0.37
  -1   1 -15    0.11    0.43
   1   1  15    0.94    0.39
   1   1  15    0.23    0.37
   1  -1  15   -0.02    0.36
   1  -1  15    0.66    0.50
   1  -1  15    0.51    0.37
  -1  -1 -15    0.30    0.48
  -1  -1 -15   -0.06    0.63
   1   1  17    0.70    0.46
  -1   1 -17    0.30    0.75
  -1   1 -17    0.59    0.55
   1   1  17    0.66    0.43
   1   1  17    0.11    0.52
  -1  -1 -17    2.02    0.86
  -1  -1 -17    0.26    0.53
   1  -1  17    0.14    0.43
   1  -1  17   -0.62    0.51
  -1   2  16    0.62    0.43
  -1   2  16    0.58    0.47
   1   2 -16    0.45    0.52
  -1   2  16    1.18    0.49
  -1   2  16    1.20    0.57
   1  -2 -16    0.85    0.43
  -1  -2  16    0.11    0.38
   1  -2 -16    0.92    0.54
  -1  -2  16    0.92    0.43
   1  -2 -16    1.16    0.80
  -1  -2  16    0.36    0.54
  -1  -2  16    1.10    0.48
  -1   2  14    1.95    0.73
  -1   2  14    1.19    0.55
  -1   2  14    1.05    0.45
   1   2 -14    0.97    0.50
  -1   2  14    1.98    0.54
   1   2 -14    2.60    0.74
  -1  -2  14    2.44    0.59
  -1  -2  14    1.14    0.41
   1  -2 -14    1.19    0.43
   1  -2 -14    2.48    0.76
  -1  -2  14    1.44    0.47
   1  -2 -14    1.56    0.58
  -1  -2  14    0.70    0.40
  -1   2  12    1.68    0.54
   1   2 -12    2.13    0.53
  -1   2  12    1.94    0.47
   1   2 -12    2.73    0.45
  -1   2  12    2.85    0.48
   1   2 -12    1.73    0.41
  -1   2  12    2.57    0.48
   1   2 -12    1.55    0.64
  -1   2  12    1.74    0.50
  -1  -2  12    2.16    0.44
   1  -2 -12    2.05    0.39
   1  -2 -12    2.13    0.42
  -1  -2  12    2.61    0.56
  -1  -2  12    2.87    0.51
   1  -2 -12    2.25    0.57
   1  -2 -12    2.96    0.68
  -1  -2  12    1.67    0.42
   1   2 -10    2.36    0.44
  -1   2  10    3.67    0.51
   1   2 -10    3.35    0.45
  -1   2  10    3.70    0.50
  -1   2  10    3.47    0.57
   1   2 -10    2.90    0.49
  -1   2  10    2.91    0.51
   1   2 -10    3.58    0.62
  -1  -2  10    2.86    0.46
   1  -2 -10    3.85    0.58
  -1  -2  10    3.20    0.45
   1  -2 -10    2.66    0.43
   1  -2 -10    4.54    0.68
  -1  -2  10    3.74    0.51
  -1  -2  10    2.59    0.42
   1   2  -8   17.55    1.80
  -1   2   8   22.39    1.84
  -1   2   8   22.84    1.83
   1   2  -8   21.32    1.80
   1   2  -8   19.84    1.83
   1   2  -8   25.12    1.82
   1   2  -8   24.66    1.92
  -1   2   8   22.30    1.85
   1   2  -8   20.50    1.80
  -1   2   8   22.00    1.86
  -1  -2   8   18.44    1.81
  -1  -2   8   18.96    1.78
  -1  -2   8   20.86    1.80
  -1  -2   8   23.10    1.88
   1  -2  -8   23.08    1.84
   1  -2  -8   26.15    1.96
  -1  -2   8   17.67    1.78
  -1  -2   8   23.62    1.84
  -1  -2   8   20.82    1.80
   1  -2  -8   21.42    1.82
   1  -2  -8   20.56    1.80
   1  -2  -8   23.70    1.88
   1   2  -6   19.09    1.56
   1   2  -6   16.61    1.51
  -1   2   6   16.33    1.50
   1   2  -6   19.34    1.46
  -1   2   6   17.72    1.50
  -1   2   6   17.02    1.50
  -1   2   6   16.83    1.56
   1   2  -6   19.80    1.48
   1   2  -6   17.07    1.53
  -1   2   6   18.60    1.50
  -1   2   6   17.47    1.45
   1  -2  -6   15.04    1.46
  -1  -2   6   15.74    1.48
   1  -2  -6   17.16    1.46
  -1  -2   6   17.16    1.51
  -1  -2   6   18.47    1.51
   1  -2  -6   18.09    1.52
  -1  -2   6   16.66    1.55
   1  -2  -6   16.54    1.49
  -1  -2   6   18.10    1.45
  -1  -2   6   14.98    1.51
  -1  -2   6   14.92    1.44
   1  -2  -6   16.56    1.58
  -1  -2   6   17.82    1.52
   1  -2  -6   18.38    1.50
   1   2  -4  494.70   36.23
   1   2  -4  446.68   36.23
  -1   2   4  449.01   36.25
  -1   2   4  438.46   36.24
  -1   2   4  463.52   36.25
   1   2  -4  467.02   36.24
   1   2  -4  484.44   36.23
  -1   2   4  468.95   36.25
   1   2  -4  430.44   36.24
  -1   2   4  425.79   36.27
  -1   2   4  471.80   36.24
   1   2  -4  485.52   36.25
   1   2  -4  424.96   36.23
  -1   2   4  432.32   36.23
   1   2  -4  463.93   36.23
  -1   2   4  496.94   36.23
  -1  -2   4  426.19   36.24
   1  -2  -4  483.31   36.23
   1  -2  -4  474.41   36.24
   1  -2  -4  489.74   36.23
  -1  -2   4  471.27   36.23
   1  -2  -4  454.34   36.24
  -1  -2   4  462.42   36.23
  -1  -2   4  469.95   36.25
  -1  -2   4  467.59   36.24
  -1  -2   4  426.65   36.23
   1  -2  -4  460.92   36.26
   1  -2  -4  442.12   36.25
  -1  -2   4  439.56   36.23
  -1  -2   4  432.46   36.23
   1   2  -2  164.31   13.47
   1   2  -2  174.72   13.47
   1   2  -2  177.88   13.46
   1   2  -2  174.24   13.46
  -1   2   2  165.62   13.47
  -1   2   2  184.54   13.46
  -1   2   2  166.72   13.47
  -1   2   2  166.53   13.48
   1   2  -2  160.26   13.45
  -1   2   2  165.36   13.48
   1   2  -2  176.33   13.47
  -1   2   2  155.48   13.47
   1   2  -2  178.94   13.47
  -1  -2   2  174.14   13.47
  -1  -2   2  173.18   13.47
  -1  -2   2  171.15   13.46
  -1  -2   2  174.50   13.46
   1  -2  -2  160.54   13.47
   1  -2  -2  167.31   13.47
   1  -2  -2  165.54   13.46
  -1  -2   2  177.56   13.46
   1  -2  -2  159.91   13.47
   1  -2  -2  163.05   13.47
   1  -2  -2  179.28   13.46
   1  -2  -2  163.17   13.47
  -1  -2   2  174.59   13.46
  -1  -2   2  177.20   13.47
   1   2   0  168.26   13.94
   1   2   0  160.63   13.93
   1   2   0  171.06   13.93
   1   2   0  187.00   13.93
  -1   2   0  189.69   13.94
  -1   2   0  179.97   13.93
   1   2   0  179.80   13.93
   1   2   0  173.77   13.94
  -1   2   0  184.39   13.93
   1   2   0  164.66   13.94
  -1   2   0  178.09   13.93
   1   2   0  169.52   13.93
   1   2   0  166.38   13.93
  -1   2   0  183.93   13.93
  -1   2   0  177.57   13.93
  -1   2   0  176.79   13.94
  -1   2   0  177.58   13.93
  -1  -2   0  174.99   13.93
  -1  -2   0  176.55   13.93
  -1  -2   0  189.82   13.93
  -1  -2   0  164.95   13.93
   1  -2   0  179.56   13.93
  -1  -2   0  177.53   13.94
   1  -2   0  179.82   13.94
  -1  -2   0  179.61   13.93
  -1  -2   0  180.84   13.93
  -1  -2   0  173.55   13.94
   1  -2   0  172.75   13.94
   1  -2   0  177.88   13.93
   1  -2   0  180.37   13.94
   1  -2   0  190.53   13.93
   1  -2   0  165.16   13.92
  -1  -2   0  180.26   13.94
   1  -2   0  161.87   13.93
  -1  -2   0  168.48   13.93
  -1   2  -2  165.84   12.50
   1   2   2  165.48   12.51
   1   2   2  157.75   12.51
  -1   2  -2  145.95   12.49
  -1   2  -2  157.87   12.49
   1   2   2  149.80   12.50
  -1   2  -2  165.02   12.49
   1   2   2  154.62   12.51
   1   2   2  155.89   12.51
   1   2   2  158.47   12.49
   1   2   2  169.20   12.50
   1   2   2  159.40   12.50
   1  -2   2  168.25   12.50
  -1  -2  -2  160.00   12.51
   1  -2   2  150.57   12.49
  -1  -2  -2  168.93   12.51
   1  -2   2  175.93   12.49
  -1  -2  -2  154.12   12.51
  -1  -2  -2  151.17   12.49
   1  -2   2  149.60   12.49
  -1  -2  -2  155.62   12.49
  -1  -2  -2  154.61   12.51
  -1  -2  -2  141.21   12.50
  -1  -2  -2  153.66   12.50
  -1   2  -4  446.06   36.08
   1   2   4  424.64   36.09
  -1   2  -4  464.60   36.10
   1   2   4  435.13   36.10
  -1   2  -4  472.54   36.08
  -1   2  -4  456.29   36.11
   1   2   4  444.72   36.11
   1   2   4  473.47   36.09
   1   2   4  447.59   36.10
   1  -2   4  477.09   36.10
  -1  -2  -4  451.16   36.11
   1  -2   4  436.80   36.10
   1  -2   4  486.33   36.08
  -1  -2  -4  474.53   36.08
   1  -2   4  458.63   36.08
  -1  -2  -4  456.55   36.11
   1  -2   4  485.90   36.10
  -1  -2  -4  446.55   36.10
  -1  -2  -4  433.23   36.09
   1   2   6   19.15    1.72
   1   2   6   20.47    1.67
  -1   2  -6   20.74    1.69
  -1   2  -6   21.28    1.68
   1   2   6   18.90    1.71
   1   2   6   21.40    1.73
   1   2   6   16.93    1.69
  -1  -2  -6   17.82    1.71
  -1  -2  -6   20.31    1.67
   1  -2   6   23.09    1.73
   1  -2   6   20.33    1.67
   1  -2   6   21.12    1.73
  -1  -2  -6   20.84    1.80
  -1  -2  -6   20.57    1.73
   1  -2   6   20.43    1.68
   1  -2   6   21.06    1.68
  -1  -2  -6   20.58    1.77
   1   2   8   23.14    2.03
   1   2   8   24.89    2.04
  -1   2  -8   25.91    2.10
  -1   2  -8   23.93    2.06
  -1   2  -8   22.33    2.01
   1   2   8   23.25    2.01
   1   2   8   20.88    2.15
  -1   2  -8   24.40    2.03
  -1  -2  -8   25.84    2.11
   1  -2   8   22.66    2.03
   1  -2   8   23.41    1.99
  -1  -2  -8   22.30    2.01
   1  -2   8   22.97    1.99
  -1  -2  -8   27.50    2.10
  -1  -2  -8   27.74    2.06
   1  -2   8   23.66    1.99
  -1   2 -10    3.78    0.51
   1   2  10    3.75    0.54
  -1   2 -10    3.80    0.67
   1   2  10    3.04    0.52
   1   2  10    3.39    0.50
   1   2  10    2.80    0.49
  -1   2 -10    4.64    0.60
   1  -2  10    3.26    0.47
  -1  -2 -10    3.64    0.60
   1  -2  10    3.53    0.47
  -1  -2 -10    3.70    0.65
   1  -2  10    4.24    0.56
  -1  -2 -10    3.96    0.60
   1   2  12    2.93    0.54
   1   2  12    1.40    0.47
   1   2  12    1.76    0.54
   1   2  12    2.54    0.45
  -1   2 -12    3.02    0.62
  -1   2 -12    2.64    0.65
  -1   2 -12    1.85    0.48
   1   2  12    2.17    0.54
   1  -2  12    3.16    0.57
  -1  -2 -12    1.95    0.65
   1  -2  12    2.60    0.44
   1  -2  12    2.33    0.44
  -1  -2 -12    2.35    0.55
  -1  -2 -12    2.77    0.63
  -1   2 -14    1.00    0.54
  -1   2 -14    3.14    0.75
   1   2  14    1.36    0.43
   1   2  14    1.58    0.50
   1   2  14    0.71    0.41
  -1  -2 -14    1.28    0.54
   1  -2  14    0.69    0.51
  -1  -2 -14    2.37    0.72
   1  -2  14    0.84    0.39
   1  -2  14    1.16    0.39
  -1   2 -16    1.74    0.74
   1   2  16   -0.17    0.46
  -1   2 -16    0.71    0.51
   1   2  16    0.39    0.40
   1   2  16    0.05    0.39
   1   2  16    0.70    0.49
  -1  -2 -16    0.42    0.54
  -1  -2 -16    1.16    0.74
   1  -2  16    0.83    0.42
   1  -2  16    0.29    0.44
   1  -2  16    0.96    0.54
   1   3 -17    0.59    0.59
  -1   3  17    0.14    0.52
  -1   3  17    0.65    0.45
  -1   3  17    0.89    0.51
  -1   3  17    1.14    0.54
   1  -3 -17    0.41    0.43
   1  -3 -17    0.45    0.60
   1  -3 -17    0.32    0.79
  -1  -3  17   -0.07    0.52
  -1  -3  17    0.42    0.57
  -1  -3  17    0.22    0.42
   1   3 -15    0.48    0.49
  -1   3  15    1.35    0.46
  -1   3  15    1.72    0.57
  -1   3  15    0.98    0.45
  -1   3  15    0.83    0.48
   1  -3 -15    0.38    0.53
  -1  -3  15    1.75    0.65
   1  -3 -15    1.03    0.41
   1  -3 -15    0.58    0.67
  -1  -3  15    1.09    0.42
  -1  -3  15    0.71    0.40
  -1  -3  15    0.87    0.57
  -1   3  13    0.97    0.50
   1   3 -13    0.33    0.34
  -1   3  13    0.91    0.41
   1   3 -13    0.76    0.60
  -1   3  13    0.94    0.38
  -1   3  13    0.35    0.42
  -1   3  13    0.77    0.45
   1  -3 -13    1.05    0.63
  -1  -3  13    1.17    0.50
   1  -3 -13    0.91    0.36
  -1  -3  13    0.59    0.35
  -1  -3  13    0.78    0.42
   1  -3 -13    0.64    0.34
  -1  -3  13    0.34    0.40
   1  -3 -13    1.32    0.52
  -1   3  11    0.45    0.36
  -1   3  11    0.69    0.40
   1   3 -11    0.63    0.33
   1   3 -11    0.24    0.38
  -1   3  11    0.49    0.41
  -1   3  11   -0.41    0.41
   1   3 -11   -0.35    0.49
  -1  -3  11    0.20    0.27
  -1  -3  11    0.26    0.33
   1  -3 -11    0.09    0.29
  -1  -3  11    0.16    0.30
  -1  -3  11   -0.04    0.39
   1  -3 -11    0.05    0.52
   1  -3 -11    0.02    0.30
   1  -3 -11    0.15    0.42
   1   3  -9    4.44    0.61
  -1   3   9    5.94    0.71
   1   3  -9    6.35    0.67
  -1   3   9    6.72    0.75
   1   3  -9    4.80    0.65
  -1   3   9    6.41    0.70
   1   3  -9    5.85    0.74
   1   3  -9    5.13    0.59
   1  -3  -9    5.79    0.66
  -1  -3   9    5.85    0.70
   1  -3  -9    6.59    0.79
  -1  -3   9    5.07    0.60
  -1  -3   9    5.82    0.62
   1  -3  -9    6.41    0.74
  -1  -3   9    5.91    0.72
   1  -3  -9    5.58    0.60
   1   3  -7    7.10    0.89
   1   3  -7    8.87    1.03
  -1   3   7   10.78    0.94
  -1   3   7    7.98    0.82
   1   3  -7    7.61    0.83
  -1   3   7    8.66    0.87
   1   3  -7    8.16    0.79
   1   3  -7    8.30    0.88
  -1   3   7    9.22    0.93
  -1   3   7    9.54    0.91
   1   3  -7    9.00    0.98
   1   3  -7    7.49    0.81
  -1  -3   7    8.14    0.79
   1  -3  -7    8.48    0.94
  -1  -3   7    8.59    0.95
  -1  -3   7    9.04    0.85
  -1  -3   7    7.12    0.83
   1  -3  -7    9.24    0.91
  -1  -3   7    8.93    0.88
   1  -3  -7    7.88    0.95
  -1  -3   7    7.01    0.88
  -1  -3   7    7.19    0.80
   1  -3  -7    9.92    0.84
  -1  -3   7    6.27    0.80
   1  -3  -7    8.32    0.82
   1   3  -5    3.93    0.45
  -1   3   5    3.77    0.50
  -1   3   5    4.37    0.57
  -1   3   5    3.86    0.51
   1   3  -5    3.76    0.54
   1   3  -5    3.64    0.42
  -1   3   5    3.10    0.53
  -1   3   5    3.85    0.48
   1   3  -5    4.26    0.49
  -1   3   5    4.24    0.52
  -1   3   5    4.33    0.45
  -1   3   5    3.55    0.46
   1   3  -5    4.58    0.45
   1   3  -5    3.66    0.46
   1   3  -5    3.46    0.48
   1   3  -5    5.01    0.49
  -1   3   5    4.11    0.55
   1   3  -5    4.12    0.44
   1  -3  -5    4.65    0.45
   1  -3  -5    3.71    0.50
   1  -3  -5    4.56    0.60
  -1  -3   5    4.42    0.50
   1  -3  -5    3.68    0.50
   1  -3  -5    3.62    0.54
  -1  -3   5    4.12    0.46
  -1  -3   5    3.93    0.43
  -1  -3   5    3.90    0.46
   1  -3  -5    3.93    0.55
  -1  -3   5    4.51    0.50
  -1  -3   5    4.55    0.56
  -1  -3   5    4.80    0.50
  -1  -3   5    4.43    0.49
   1  -3  -5    3.96    0.44
  -1  -3   5    3.77    0.48
   1   3  -3  244.31   18.05
  -1   3   3  232.14   18.03
  -1   3   3  214.89   18.06
  -1   3   3  214.42   18.06
  -1   3   3  224.65   18.06
  -1   3   3  211.94   18.05
   1   3  -3  227.93   18.05
  -1   3   3  239.09   18.04
  -1   3   3  241.06   18.06
   1   3  -3  223.81   18.05
  -1   3   3  218.93   18.05
   1   3  -3  239.01   18.04
  -1   3   3  213.29   18.05
   1   3  -3  227.18   18.03
  -1   3   3  232.47   18.05
   1   3  -3  238.51   18.04
   1   3  -3  236.58   18.04
  -1  -3   3  244.83   18.05
  -1  -3   3  229.09   18.03
   1  -3  -3  225.09   18.05
  -1  -3   3  203.35   18.06
   1  -3  -3  213.74   18.05
  -1  -3   3  239.24   18.04
  -1  -3   3  225.39   18.05
   1  -3  -3  244.38   18.04
  -1  -3   3  229.32   18.05
  -1  -3   3  231.29   18.04
   1  -3  -3  219.37   18.06
  -1  -3   3  232.46   18.04
   1  -3  -3  223.65   18.06
   1  -3  -3  223.00   18.06
   1   3  -1    8.47    0.75
   1   3  -1    7.68    0.73
   1   3  -1    8.69    0.77
  -1   3   1    7.53    0.77
   1   3  -1    7.58    0.75
  -1   3   1    9.78    0.75
  -1   3   1    8.24    0.75
   1   3  -1    7.88    0.77
  -1   3   1    9.03    0.78
  -1   3   1    8.95    0.75
  -1   3   1    8.44    0.76
   1   3  -1    9.09    0.74
   1   3  -1    9.46    0.76
  -1   3   1    7.36    0.76
  -1   3   1    8.40    0.76
   1   3  -1    8.24    0.72
   1  -3  -1    8.40    0.74
   1  -3  -1    7.94    0.75
   1  -3  -1    7.71    0.76
   1  -3  -1    7.13    0.77
   1  -3  -1    6.85    0.78
  -1  -3   1    8.40    0.74
  -1  -3   1    7.88    0.74
  -1  -3   1    8.37    0.77
   1  -3  -1    8.90    0.77
   1  -3  -1    9.47    0.77
  -1  -3   1    9.66    0.74
  -1  -3   1    8.77    0.76
  -1  -3   1    8.41    0.75
   1  -3  -1    9.35    0.77
  -1  -3   1    8.42    0.74
   1  -3  -1    9.13    0.73
   1   3   1    6.70    0.68
   1   3   1    6.51    0.67
   1   3   1    6.07    0.65
   1   3   1    6.44    0.64
   1   3   1    7.03    0.67
  -1   3  -1    8.31    0.69
  -1   3  -1    8.67    0.65
   1   3   1    6.49    0.68
   1   3   1    6.81    0.66
   1   3   1    7.12    0.64
  -1   3  -1    8.72    0.63
  -1   3  -1    8.50    0.64
   1   3   1    6.81    0.67
  -1  -3  -1    6.65    0.66
  -1  -3  -1    6.52    0.64
  -1  -3  -1    6.23    0.66
  -1  -3  -1    6.52    0.68
   1  -3   1    8.01    0.65
  -1  -3  -1    5.87    0.68
   1  -3   1    8.48    0.67
  -1  -3  -1    6.98    0.64
  -1  -3  -1    6.25    0.67
  -1  -3  -1    6.63    0.66
  -1  -3  -1    7.02    0.67
  -1  -3  -1    6.72    0.69
  -1  -3  -1    5.96    0.65
   1   3   3  213.05   17.00
  -1   3  -3  213.99   16.98
   1   3   3  214.72   17.00
   1   3   3  208.71   16.99
  -1   3  -3  211.64   16.97
   1   3   3  215.85   16.98
   1   3   3  219.41   16.99
   1   3   3  217.32   17.00
  -1   3  -3  222.09   16.98
   1   3   3  223.01   17.00
  -1   3  -3  220.90   16.98
  -1  -3  -3  204.76   17.00
  -1  -3  -3  210.49   16.98
   1  -3   3  220.80   16.98
  -1  -3  -3  213.81   17.00
   1  -3   3  207.96   16.98
  -1  -3  -3  225.81   16.97
   1  -3   3  206.91   16.97
  -1  -3  -3  217.27   17.00
  -1  -3  -3  209.18   16.99
  -1  -3  -3  207.25   17.00
   1  -3   3  237.99   16.98
  -1  -3  -3  206.20   17.00
  -1  -3  -3  198.35   16.97
   1   3   5    3.55    0.49
   1   3   5    3.58    0.48
  -1   3  -5    3.75    0.41
   1   3   5    4.52    0.48
   1   3   5    3.52    0.48
   1   3   5    3.45    0.53
  -1   3  -5    3.46    0.49
  -1   3  -5    4.51    0.47
  -1   3  -5    4.18    0.47
  -1   3  -5    4.16    0.45
   1  -3   5    3.78    0.45
   1  -3   5    4.25    0.45
  -1  -3  -5    3.62    0.51
  -1  -3  -5    3.94    0.55
   1  -3   5    3.90    0.49
  -1  -3  -5    4.81    0.52
  -1  -3  -5    3.68    0.41
   1  -3   5    4.47    0.48
   1  -3   5    4.16    0.50
  -1  -3  -5    3.02    0.46
  -1  -3  -5    4.44    0.48
  -1   3  -7    7.16    0.81
   1   3   7    8.87    0.86
   1   3   7    9.94    0.92
   1   3   7    9.27    1.00
   1   3   7    6.46    0.77
   1   3   7    8.80    0.86
  -1   3  -7    8.72    0.97
   1  -3   7    6.72    0.76
  -1  -3  -7    7.41    0.87
  -1  -3  -7    7.10    0.87
   1  -3   7    9.32    0.90
   1  -3   7    7.54    0.87
   1  -3   7    8.97    0.81
  -1  -3  -7    8.21    0.91
  -1  -3  -7    8.21    0.93
  -1  -3  -7    8.14    0.80
   1   3   9    6.00    0.69
   1   3   9    7.30    0.71
  -1   3  -9    5.81    0.72
   1   3   9    5.11    0.63
  -1   3  -9    5.76    0.66
   1   3   9    6.22    0.64
  -1   3  -9    5.03    0.59
   1  -3   9    4.20    0.57
   1  -3   9    4.84    0.57
  -1  -3  -9    5.64    0.79
   1  -3   9    4.77    0.64
  -1  -3  -9    6.09    0.72
  -1  -3  -9    5.27    0.60
   1  -3   9    4.82    0.62
   1   3  11    0.20    0.40
   1   3  11   -0.09    0.31
  -1   3 -11   -0.36    0.34
  -1   3 -11    0.36    0.44
  -1   3 -11    1.35    0.51
  -1  -3 -11    1.36    0.57
   1  -3  11    0.25    0.26
   1  -3  11    0.25    0.39
   1  -3  11   -0.10    0.28
  -1  -3 -11    0.06    0.49
   1   3  13    0.48    0.47
  -1   3 -13    0.41    0.52
   1   3  13    0.72    0.48
   1   3  13   -0.07    0.37
   1   3  13    0.53    0.35
  -1   3 -13    0.17    0.40
   1   3  13    0.65    0.37
  -1   3 -13    0.99    0.58
   1  -3  13    0.62    0.39
   1  -3  13    0.53    0.45
  -1  -3 -13    0.70    0.60
   1  -3  13    0.29    0.31
  -1  -3 -13    1.85    0.53
   1   3  15    1.18    0.49
   1   3  15    1.44    0.59
  -1   3 -15    1.06    0.69
  -1   3 -15    0.62    0.47
   1   3  15    1.24    0.59
   1   3  15    0.96    0.43
   1   3  15    1.51    0.45
   1  -3  15    0.29    0.49
  -1  -3 -15    1.13    0.55
   1  -3  15    0.64    0.45
   1  -3  15    0.33    0.41
  -1  -3 -15    1.22    0.73
   1   3  17    0.40    0.50
   1   3  17    0.51    0.57
   1   3  17    0.59    0.46
  -1   3 -17    0.42    0.51
  -1   3 -17    0.74    0.73
   1   3  17    0.56    0.60
   1  -3  17    1.16    0.58
  -1  -3 -17    1.17    0.64
  -1  -3 -17   -0.06    0.75
   1   4 -16   -0.03    0.49
  -1   4  16    0.57    0.50
  -1   4  16   -0.13    0.73
  -1   4  16    0.09    0.43
  -1   4  16    0.16    0.53
  -1  -4  16    1.39    0.57
  -1  -4  16    0.00    0.48
  -1  -4  16    0.47    0.40
   1  -4 -16   -0.41    0.37
   1  -4 -16    0.83    0.55
  -1  -4  16   -0.21    0.35
   1  -4 -16    0.97    0.74
  -1   4  14    0.86    0.50
   1   4 -14    0.45    0.40
  -1   4  14    0.70    0.42
  -1   4  14    0.70    0.40
  -1   4  14    0.27    0.46
   1   4 -14    0.12    0.45
  -1   4  14    0.93    0.58
   1  -4 -14    0.96    0.37
  -1  -4  14    0.91    0.52
  -1  -4  14    0.26    0.38
  -1  -4  14    0.95    0.37
   1  -4 -14    1.39    0.71
   1  -4 -14   -0.19    0.49
   1  -4 -14    0.43    0.37
  -1  -4  14    0.20    0.45
  -1   4  12    4.23    0.68
  -1   4  12    4.02    0.64
   1   4 -12    3.12    0.49
   1   4 -12    4.02    0.72
   1   4 -12    2.61    0.48
  -1   4  12    3.45    0.61
  -1   4  12    3.26    0.57
   1   4 -12    3.55    0.56
   1  -4 -12    2.84    0.47
   1  -4 -12    3.48    0.57
  -1  -4  12    2.71    0.48
  -1  -4  12    2.61    0.53
   1  -4 -12    3.18    0.64
   1  -4 -12    5.19    0.81
  -1  -4  12    3.08    0.63
   1   4 -10    3.12    0.44
   1   4 -10    2.08    0.40
   1   4 -10    1.86    0.39
  -1   4  10    3.33    0.53
   1   4 -10    1.86    0.46
  -1   4  10    2.93    0.50
   1  -4 -10    2.74    0.44
  -1  -4  10    2.63    0.43
  -1  -4  10    2.87    0.49
  -1  -4  10    2.49    0.41
   1  -4 -10    2.61    0.43
   1  -4 -10    3.84    0.65
   1  -4 -10    4.13    0.97
   1   4  -8   22.81    1.89
   1   4  -8   22.43    1.97
  -1   4   8   23.61    1.93
   1   4  -8   20.41    1.99
  -1   4   8   24.29    1.95
  -1   4   8   21.66    1.91
   1   4  -8   21.53    1.91
  -1   4   8   22.75    1.95
   1   4  -8   22.73    1.90
  -1  -4   8   17.66    1.85
   1  -4  -8   23.56    1.89
  -1  -4   8   19.65    1.87
  -1  -4   8   22.71    1.95
  -1  -4   8   21.87    1.91
   1  -4  -8   26.60    1.89
   1  -4  -8   26.85    2.02
  -1  -4   8   22.36    1.92
   1  -4  -8   23.50    1.96
  -1   4   6   77.31    5.81
   1   4  -6   74.63    5.81
   1   4  -6   68.23    5.82
  -1   4   6   77.59    5.84
   1   4  -6   68.58    5.82
  -1   4   6   77.48    5.85
   1   4  -6   74.37    5.83
   1   4  -6   74.54    5.82
   1   4  -6   72.08    5.84
  -1   4   6   62.26    5.84
  -1   4   6   70.36    5.84
   1   4  -6   78.05    5.85
  -1   4   6   76.48    5.83
   1  -4  -6   79.68    5.84
  -1  -4   6   81.09    5.85
  -1  -4   6   60.84    5.79
  -1  -4   6   66.61    5.81
   1  -4  -6   80.41    5.85
  -1  -4   6   72.30    5.82
   1  -4  -6   73.67    5.87
   1  -4  -6   71.44    5.85
  -1  -4   6   77.48    5.84
  -1  -4   6   69.04    5.83
   1  -4  -6   70.13    5.85
  -1  -4   6   64.03    5.81
  -1  -4   6   68.95    5.80
   1  -4  -6   78.33    5.81
  -1  -4   6   71.64    5.84
   1   4  -4  343.29   27.27
  -1   4   4  335.54   27.29
   1   4  -4  350.18   27.28
   1   4  -4  368.76   27.27
  -1   4   4  341.43   27.29
   1   4  -4  361.35   27.26
   1   4  -4  360.40   27.31
   1   4  -4  357.75   27.26
  -1   4   4  363.35   27.28
  -1   4   4  333.54   27.28
  -1   4   4  332.71   27.29
  -1   4   4  333.82   27.29
  -1   4   4  329.25   27.27
   1  -4  -4  309.35   27.29
  -1  -4   4  341.67   27.31
   1  -4  -4  360.98   27.35
   1  -4  -4  321.17   27.28
  -1  -4   4  347.90   27.28
   1  -4  -4  349.90   27.26
   1  -4  -4  335.14   27.27
  -1  -4   4  368.14   27.26
  -1  -4   4  324.08   27.27
  -1  -4   4  343.92   27.26
  -1  -4   4  360.79   27.27
  -1  -4   4  365.34   27.26
   1  -4  -4  342.25   27.30
   1  -4  -4  321.72   27.28
   1   4  -2    4.34    0.41
  -1   4   2    3.07    0.40
   1   4  -2    3.60    0.41
  -1   4   2    3.70    0.45
  -1   4   2    4.60    0.45
   1   4  -2    4.00    0.44
  -1   4   2    3.16    0.44
  -1   4   2    2.43    0.41
   1   4  -2    3.93    0.37
  -1   4   2    3.21    0.45
   1   4  -2    3.18    0.39
   1   4  -2    3.62    0.43
  -1   4   2    3.06    0.46
  -1   4   2    3.93    0.48
   1   4  -2    4.59    0.46
  -1   4   2    3.17    0.44
  -1  -4   2    2.98    0.40
   1  -4  -2    3.68    0.47
  -1  -4   2    4.29    0.43
   1  -4  -2    4.02    0.45
  -1  -4   2    3.89    0.44
  -1  -4   2    4.18    0.41
   1  -4  -2    3.18    0.46
   1  -4  -2    3.78    0.39
   1  -4  -2    3.31    0.40
   1  -4  -2    3.34    0.42
   1  -4  -2    3.40    0.41
   1  -4  -2    3.66    0.43
   1  -4  -2    3.85    0.47
   1  -4  -2    4.11    0.45
  -1  -4   2    4.24    0.46
  -1  -4   2    4.41    0.41
  -1  -4   2    4.14    0.38
  -1   4   0  181.84   13.70
   1   4   0  182.21   13.69
   1   4   0  166.70   13.68
   1   4   0  166.34   13.69
  -1   4   0  168.20   13.68
   1   4   0  167.91   13.69
   1   4   0  160.44   13.68
  -1   4   0  166.72   13.68
  -1   4   0  166.53   13.70
   1   4   0  173.84   13.69
   1   4   0  179.26   13.68
  -1   4   0  175.20   13.68
  -1   4   0  165.22   13.69
  -1   4   0  179.69   13.68
   1   4   0  173.92   13.70
  -1   4   0  173.21   13.68
  -1   4   0  169.08   13.68
   1  -4   0  177.93   13.70
   1  -4   0  166.72   13.68
   1  -4   0  166.15   13.68
   1  -4   0  178.32   13.70
   1  -4   0  174.35   13.68
  -1  -4   0  174.60   13.68
   1  -4   0  174.37   13.68
  -1  -4   0  179.52   13.69
  -1  -4   0  176.94   13.69
  -1  -4   0  177.57   13.71
   1  -4   0  167.29   13.70
  -1  -4   0  173.29   13.69
  -1  -4   0  176.48   13.69
   1  -4   0  175.16   13.69
  -1  -4   0  171.72   13.70
  -1  -4   0  174.74   13.69
   1   4   2    3.02    0.42
   1   4   2    5.71    0.59
   1   4   2    3.61    0.44
  -1   4  -2    4.21    0.40
  -1   4  -2    5.05    0.48
   1   4   2    2.85    0.46
  -1   4  -2    4.58    0.50
   1   4   2    4.06    0.47
  -1   4  -2    2.81    0.42
  -1   4  -2    3.54    0.46
   1   4   2    3.23    0.43
   1   4   2    5.64    0.57
   1   4   2    3.69    0.47
   1   4   2    4.33    0.50
  -1  -4  -2    3.05    0.42
  -1  -4  -2    3.76    0.46
  -1  -4  -2    3.04    0.43
  -1  -4  -2    5.29    0.57
  -1  -4  -2    4.49    0.51
   1  -4   2    3.94    0.45
   1  -4   2    4.80    0.47
  -1  -4  -2    5.60    0.59
   1  -4   2    3.75    0.44
  -1  -4  -2    4.79    0.47
   1  -4   2    3.38    0.39
   1  -4   2    5.23    0.47
   1   4   4  325.68   26.33
   1   4   4  320.46   26.32
  -1   4  -4  336.36   26.32
   1   4   4  330.01   26.34
   1   4   4  327.87   26.34
  -1   4  -4  311.43   26.31
   1   4   4  331.95   26.34
   1   4   4  340.50   26.35
  -1   4  -4  334.42   26.32
   1   4   4  327.90   26.34
   1   4   4  327.79   26.37
   1   4   4  328.39   26.31
  -1   4  -4  342.92   26.32
  -1  -4  -4  332.58   26.34
   1  -4   4  344.69   26.32
  -1  -4  -4  361.81   26.32
  -1  -4  -4  324.90   26.43
  -1  -4  -4  330.27   26.33
  -1  -4  -4  311.60   26.34
   1  -4   4  357.28   26.32
   1  -4   4  352.51   26.32
  -1  -4  -4  330.25   26.35
  -1  -4  -4  319.43   26.31
  -1  -4  -4  331.40   26.34
   1  -4   4  332.48   26.32
  -1   4  -6   72.50    5.84
   1   4   6   73.56    5.86
  -1   4  -6   76.75    5.83
   1   4   6   73.62    5.86
  -1   4  -6   77.49    5.81
  -1   4  -6   74.62    5.85
  -1   4  -6   67.72    5.81
   1   4   6   62.22    5.86
   1  -4   6   72.70    5.82
  -1  -4  -6   67.99    5.85
   1  -4   6   77.35    5.83
  -1  -4  -6   73.01    5.87
  -1  -4  -6   69.53    5.85
  -1  -4  -6   65.96    5.79
   1  -4   6   68.23    5.80
  -1  -4  -6   73.33    5.81
  -1  -4  -6   83.85    6.00
   1  -4   6   78.09    5.84
  -1  -4  -6   72.35    5.88
   1  -4   6   77.19    5.84
  -1   4  -8   23.71    1.90
  -1   4  -8   22.37    1.95
   1   4   8   18.11    1.82
  -1   4  -8   17.55    1.84
   1   4   8   21.25    1.87
   1   4   8   22.25    1.85
   1   4   8   22.75    1.88
  -1   4  -8   22.34    1.86
  -1  -4  -8   22.85    1.80
  -1  -4  -8   22.13    1.92
   1  -4   8   22.59    1.92
   1  -4   8   19.48    1.85
  -1  -4  -8   22.88    1.94
  -1  -4  -8   24.01    1.89
   1  -4   8   22.08    1.86
  -1   4 -10    3.00    0.59
   1   4  10    3.21    0.50
   1   4  10    3.01    0.55
   1   4  10    3.84    0.59
  -1   4 -10    3.03    0.55
  -1  -4 -10    2.96    0.42
   1  -4  10    2.63    0.45
  -1  -4 -10    3.26    0.57
   1  -4  10    3.03    0.54
  -1  -4 -10    2.75    0.62
  -1  -4 -10    4.06    0.64
   1   4  12    2.55    0.54
  -1   4 -12    4.11    0.66
   1   4  12    3.94    0.65
   1   4  12    3.83    0.65
  -1   4 -12    4.32    0.73
  -1  -4 -12    3.22    0.75
  -1  -4 -12    3.92    0.67
   1  -4  12    2.58    0.51
   1  -4  12    4.19    0.65
   1   4  14    0.86    0.54
   1   4  14   -0.23    0.46
   1   4  14    0.39    0.44
  -1   4 -14    0.79    0.63
   1   4  14    0.25    0.38
   1   4  14    0.77    0.36
  -1  -4 -14    0.74    0.52
   1  -4  14    0.44    0.45
  -1  -4 -14    0.73    0.64
   1  -4  14   -0.08    0.37
   1   4  16    0.70    0.55
   1   4  16    0.91    0.54
   1   4  16    0.92    0.68
   1   4  16    0.32    0.42
  -1   4 -16    0.64    0.68
   1  -4  16    1.27    0.55
   1  -4  16    0.39    0.42
  -1  -4 -16    0.37    0.61
  -1  -4 -16    0.17    0.68
  -1   5  17    0.15    0.47
  -1   5  17    0.11    0.54
   1   5 -17   -0.35    0.52
  -1   5  17   -0.64    0.43
  -1   5  17    0.18    0.54
  -1   5  17   -0.25    0.43
   1  -5 -17   -0.71    0.53
  -1  -5  17   -0.38    0.80
   1  -5 -17   -0.55    0.86
   1  -5 -17   -0.58    0.40
   1   5 -15   -0.06    0.49
  -1   5  15    0.52    0.54
  -1   5  15    0.88    0.45
  -1   5  15    0.23    0.47
  -1   5  15   -0.20    0.39
  -1   5  15    0.85    0.52
   1   5 -15    0.28    0.40
   1  -5 -15    0.10    0.37
  -1  -5  15   -0.18    0.44
  -1  -5  15    0.42    0.56
   1  -5 -15    0.98    0.74
   1  -5 -15    0.12    0.64
   1   5 -13    0.64    0.44
   1   5 -13    0.06    0.34
  -1   5  13    0.05    0.41
  -1   5  13    0.37    0.51
  -1   5  13    0.03    0.43
  -1   5  13    0.00    0.45
   1   5 -13    0.47    0.38
  -1  -5  13    0.79    0.39
  -1  -5  13    0.63    0.45
   1  -5 -13    0.85    0.53
  -1  -5  13    0.70    0.47
   1  -5 -13    0.14    0.33
   1  -5 -13   -0.09    0.34
   1   5 -11    8.98    0.95
  -1   5  11    9.42    1.03
   1   5 -11    9.59    0.97
   1   5 -11    7.50    0.97
  -1   5  11   10.79    1.07
  -1   5  11    8.43    1.02
   1  -5 -11    8.87    1.08
  -1  -5  11    7.68    0.93
   1  -5 -11   11.00    0.96
  -1  -5  11    8.24    1.06
   1  -5 -11    9.68    0.94
  -1  -5  11    7.65    1.02
  -1  -5  11    6.61    0.83
   1  -5 -11    8.68    1.06
  -1   5   9   25.98    2.33
   1   5  -9   25.13    2.31
  -1   5   9   28.67    2.37
   1   5  -9   26.85    2.30
   1   5  -9   27.21    2.30
  -1   5   9   29.66    2.37
  -1   5   9   29.36    2.34
  -1  -5   9   26.67    2.36
   1  -5  -9   27.94    2.43
   1  -5  -9   29.12    2.38
  -1  -5   9   27.77    2.29
   1  -5  -9   26.82    2.30
  -1  -5   9   26.29    2.33
   1  -5  -9   28.97    2.30
   1   5  -7   59.36    4.69
  -1   5   7   67.01    4.72
   1   5  -7   53.91    4.70
   1   5  -7   55.12    4.68
  -1   5   7   50.33    4.72
  -1   5   7   59.44    4.72
   1   5  -7   50.28    4.69
   1   5  -7   59.06    4.67
  -1   5   7   68.04    4.75
   1   5  -7   59.67    4.70
   1  -5  -7   62.12    4.69
  -1  -5   7   60.81    4.72
  -1  -5   7   48.23    4.67
   1  -5  -7   58.63    4.68
  -1  -5   7   58.97    4.69
  -1  -5   7   62.75    4.73
  -1  -5   7   55.12    4.68
  -1  -5   7   51.87    4.67
   1  -5  -7   66.31    4.77
   1  -5  -7   60.66    4.74
   1  -5  -7   58.44    4.73
   1   5  -5   54.55    4.39
  -1   5   5   57.41    4.40
   1   5  -5   55.12    4.37
   1   5  -5   53.91    4.36
   1   5  -5   49.84    4.38
  -1   5   5   54.92    4.41
  -1   5   5   50.26    4.40
  -1   5   5   56.45    4.37
  -1   5   5   55.11    4.37
   1   5  -5   54.33    4.39
  -1   5   5   54.14    4.41
  -1   5   5   57.47    4.40
   1  -5  -5   57.41    4.42
  -1  -5   5   54.55    4.37
  -1  -5   5   48.94    4.36
   1  -5  -5   53.25    4.40
   1  -5  -5   55.13    4.42
  -1  -5   5   53.88    4.37
   1  -5  -5   56.65    4.37
  -1  -5   5   55.74    4.40
  -1  -5   5   53.80    4.40
  -1  -5   5   54.47    4.38
   1  -5  -5   56.47    4.37
   1  -5  -5   50.11    4.42
   1  -5  -5   57.66    4.42
   1   5  -3  148.58   11.52
  -1   5   3  146.68   11.51
  -1   5   3  145.53   11.56
   1   5  -3  156.66   11.50
  -1   5   3  138.61   11.49
  -1   5   3  138.54   11.52
  -1   5   3  134.92   11.54
  -1   5   3  128.70   11.51
  -1   5   3  142.79   11.51
   1   5  -3  150.29   11.50
  -1   5   3  145.25   11.52
   1   5  -3  148.39   11.51
   1   5  -3  144.79   11.51
  -1  -5   3  154.65   11.50
   1  -5  -3  137.89   11.51
  -1  -5   3  151.21   11.48
   1  -5  -3  145.59   11.50
   1  -5  -3  139.51   11.51
   1  -5  -3  148.45   11.56
  -1  -5   3  149.75   11.49
   1  -5  -3  132.66   11.56
   1  -5  -3  144.16   11.52
  -1  -5   3  146.94   11.51
   1  -5  -3  147.60   11.52
   1  -5  -3  145.11   11.50
  -1  -5   3  146.01   11.50
  -1  -5   3  146.51   11.50
  -1  -5   3  146.93   11.52
   1  -5  -3  149.03   11.53
   1   5  -1  144.10   11.72
  -1   5   1  144.36   11.73
  -1   5   1  146.39   11.72
   1   5  -1  144.27   11.72
  -1   5   1  148.49   11.73
  -1   5   1  148.41   11.74
  -1   5   1  150.21   11.74
  -1   5   1  156.28   11.73
   1   5  -1  149.54   11.72
   1   5  -1  143.38   11.72
  -1   5   1  144.91   11.73
   1   5  -1  147.30   11.72
  -1   5   1  152.14   11.73
  -1   5   1  147.25   11.72
   1   5  -1  132.18   11.71
  -1   5   1  150.40   11.72
   1   5  -1  151.83   11.72
   1   5  -1  143.02   11.74
  -1  -5   1  137.69   11.72
   1  -5  -1  150.03   11.73
  -1  -5   1  145.68   11.72
  -1  -5   1  156.08   11.72
  -1  -5   1  150.85   11.74
   1  -5  -1  153.94   11.73
   1  -5  -1  156.00   11.73
   1  -5  -1  150.57   11.73
   1  -5  -1  148.42   11.74
   1  -5  -1  149.39   11.74
   1  -5  -1  145.53   11.72
   1  -5  -1  145.83   11.74
   1  -5  -1  146.20   11.72
  -1  -5   1  153.02   11.72
  -1  -5   1  145.49   11.72
  -1  -5   1  145.92   11.73
   1   5   1  142.79   11.57
  -1   5  -1  148.75   11.59
  -1   5  -1  142.04   11.56
  -1   5  -1  153.63   11.55
  -1   5  -1  145.59   11.58
  -1   5  -1  149.07   11.55
   1   5   1  150.90   11.58
   1   5   1  142.65   11.57
  -1   5  -1  151.36   11.57
  -1   5  -1  142.67   11.56
   1   5   1  140.82   11.57
   1   5   1  144.64   11.58
   1   5   1  141.98   11.57
   1   5   1  145.34   11.57
   1   5   1  141.51   11.58
   1   5   1  148.85   11.57
   1   5   1  142.52   11.57
   1  -5   1  153.22   11.56
  -1  -5  -1  144.24   11.56
  -1  -5  -1  144.28   11.56
   1  -5   1  150.49   11.56
  -1  -5  -1  145.00   11.57
   1  -5   1  145.80   11.56
   1  -5   1  150.45   11.56
   1  -5   1  153.61   11.59
   1  -5   1  147.08   11.55
  -1  -5  -1  137.12   11.58
   1  -5   1  142.46   11.56
   1  -5   1  145.20   11.57
   1  -5   1  152.70   11.58
  -1  -5  -1  141.34   11.57
   1  -5   1  142.17   11.58
  -1  -5  -1  139.63   11.56
  -1  -5  -1  153.06   11.58
  -1  -5  -1  147.29   11.57
  -1  -5  -1  145.55   11.57
   1  -5   1  153.93   11.55
  -1  -5  -1  134.66   11.56
  -1  -5  -1  141.85   11.58
  -1   5  -3  152.98   11.40
  -1   5  -3  145.19   11.40
   1   5   3  138.94   11.42
   1   5   3  142.26   11.41
  -1   5  -3  151.34   11.41
  -1   5  -3  148.12   11.42
   1   5   3  141.97   11.40
   1   5   3  131.56   11.43
   1   5   3  154.23   11.46
   1   5   3  143.13   11.46
  -1   5  -3  147.96   11.43
   1   5   3  140.26   11.43
   1   5   3  142.41   11.42
   1   5   3  146.13   11.44
   1   5   3  129.04   11.42
   1   5   3  141.89   11.44
  -1  -5  -3  136.70   11.40
  -1  -5  -3  147.30   11.43
   1  -5   3  142.20   11.43
   1  -5   3  146.25   11.40
   1  -5   3  160.43   11.41
  -1  -5  -3  133.96   11.41
  -1  -5  -3  149.32   11.46
   1  -5   3  142.80   11.41
  -1  -5  -3  148.02   11.43
   1  -5   3  152.01   11.40
  -1  -5  -3  133.89   11.43
   1  -5   3  145.44   11.42
  -1  -5  -3  139.56   11.43
  -1  -5  -3  144.62   11.42
  -1  -5  -3  137.47   11.43
   1   5   5   55.24    4.33
   1   5   5   54.84    4.33
  -1   5  -5   50.98    4.32
   1   5   5   52.66    4.32
  -1   5  -5   55.16    4.29
  -1   5  -5   48.75    4.28
  -1   5  -5   52.90    4.28
   1   5   5   56.85    4.32
  -1  -5  -5   57.78    4.34
  -1  -5  -5   54.27    4.33
   1  -5   5   49.76    4.29
   1  -5   5   53.26    4.28
  -1  -5  -5   57.34    4.28
  -1  -5  -5   53.41    4.33
   1  -5   5   52.59    4.27
  -1  -5  -5   57.23    4.35
  -1  -5  -5   50.16    4.27
   1  -5   5   47.56    4.32
  -1  -5  -5   54.65    4.29
   1   5   7   63.85    4.63
   1   5   7   48.20    4.63
  -1   5  -7   61.58    4.72
   1   5   7   58.60    4.62
   1   5   7   57.46    4.65
   1   5   7   47.90    4.61
  -1   5  -7   53.75    4.62
  -1   5  -7   57.74    4.63
  -1   5  -7   55.51    4.66
  -1   5  -7   57.34    4.61
   1  -5   7   59.74    4.65
   1  -5   7   59.05    4.62
  -1  -5  -7   54.40    4.64
  -1  -5  -7   58.58    4.59
  -1  -5  -7   63.22    4.67
   1  -5   7   56.78    4.60
  -1  -5  -7   60.22    4.68
  -1  -5  -7   63.78    4.63
   1  -5   7   57.10    4.63
   1  -5   7   49.31    4.60
  -1   5  -9   26.99    2.34
  -1   5  -9   24.59    2.24
   1   5   9   30.41    2.35
  -1   5  -9   26.67    2.24
   1   5   9   26.02    2.31
  -1   5  -9   28.14    2.30
   1   5   9   27.68    2.30
  -1  -5  -9   27.27    2.32
   1  -5   9   27.96    2.30
   1  -5   9   23.90    2.22
  -1  -5  -9   24.86    2.37
  -1  -5  -9   27.38    2.23
   1  -5   9   27.23    2.27
  -1  -5  -9   28.88    2.24
  -1  -5  -9   29.08    2.39
   1   5  11    7.21    0.88
  -1   5 -11    8.98    1.11
  -1   5 -11    9.10    1.05
   1   5  11    7.58    0.94
   1   5  11    7.45    0.93
   1  -5  11    6.66    0.98
   1  -5  11    9.22    0.93
  -1  -5 -11    8.94    0.88
  -1  -5 -11    6.56    1.03
  -1  -5 -11    8.05    0.96
   1   5  13    0.52    0.54
   1   5  13    0.32    0.43
  -1   5 -13   -0.38    0.55
  -1   5 -13    0.27    0.52
   1   5  13    0.14    0.37
   1  -5  13    0.21    0.38
  -1  -5 -13    0.38    0.38
  -1  -5 -13    0.09    0.50
   1  -5  13    0.65    0.46
   1   5  15    0.04    0.44
   1   5  15    0.35    0.54
  -1   5 -15   -0.01    0.63
   1   5  15    0.39    0.53
   1   5  15    0.16    0.41
   1   5  15   -0.27    0.53
   1  -5  15   -0.19    0.44
   1  -5  15   -0.27    0.37
  -1  -5 -15    0.60    0.70
  -1  -5 -15    0.22    0.52
   1   5  17    0.42    0.60
   1   5  17    0.30    0.45
   1   5  17   -0.14    0.54
   1   5  17    0.54    0.58
  -1  -5 -17   -0.33    0.55
   1  -5  17    0.10    0.49
  -1   6  16    1.99    0.55
  -1   6  16    2.49    0.72
  -1   6  16    2.68    0.73
  -1   6  16    1.71    0.68
   1  -6 -16    1.53    0.48
  -1  -6  16    1.37    0.58
  -1  -6  16    2.55    0.66
   1  -6 -16    1.37    0.66
   1  -6 -16    1.72    0.84
  -1   6  14    0.98    0.55
  -1   6  14    1.62    0.60
  -1   6  14    1.32    0.48
   1   6 -14    0.99    0.43
   1   6 -14    0.84    0.91
  -1   6  14    0.69    0.50
  -1  -6  14    1.99    0.63
  -1  -6  14    0.70    0.52
   1  -6 -14    0.46    0.36
   1  -6 -14    1.55    0.42
   1  -6 -14    1.33    0.71
   1  -6 -14    1.82    0.62
  -1   6  12   22.88    2.02
  -1   6  12   23.27    2.01
  -1   6  12   21.54    1.99
   1   6 -12   17.43    1.93
  -1   6  12   20.65    1.97
   1   6 -12   23.09    1.93
   1  -6 -12   23.21    2.05
   1  -6 -12   24.78    2.15
   1  -6 -12   21.99    1.91
  -1  -6  12   19.93    1.96
  -1  -6  12   25.52    2.05
   1  -6 -12   19.63    1.90
  -1   6  10   35.19    3.09
  -1   6  10   37.61    3.11
   1   6 -10   34.52    3.04
  -1   6  10   39.73    3.12
   1   6 -10   34.97    3.06
  -1   6  10   40.94    3.13
   1  -6 -10   36.72    3.05
  -1  -6  10   33.05    3.08
   1  -6 -10   39.42    3.14
   1  -6 -10   37.74    3.05
   1  -6 -10   39.19    3.20
  -1  -6  10   35.83    3.18
   1   6  -8   23.85    2.19
  -1   6   8   28.00    2.27
   1   6  -8   27.78    2.20
   1   6  -8   25.71    2.20
  -1   6   8   26.47    2.23
  -1   6   8   30.02    2.28
  -1   6   8   29.39    2.24
   1  -6  -8   24.76    2.32
   1  -6  -8   24.16    2.24
  -1  -6   8   27.16    2.25
   1  -6  -8   28.43    2.19
   1  -6  -8   27.65    2.19
  -1  -6   8   21.40    2.17
  -1  -6   8   25.44    2.23
  -1  -6   8   23.70    2.18
   1  -6  -8   28.44    2.26
  -1   6   6   38.36    3.40
   1   6  -6   37.72    3.34
  -1   6   6   45.48    3.36
  -1   6   6   46.66    3.41
   1   6  -6   41.11    3.38
   1   6  -6   39.71    3.36
  -1   6   6   42.85    3.42
   1   6  -6   35.76    3.36
  -1   6   6   43.43    3.40
   1  -6  -6   44.86    3.43
   1  -6  -6   43.84    3.38
  -1  -6   6   36.24    3.34
   1  -6  -6   49.74    3.46
  -1  -6   6   37.57    3.34
  -1  -6   6   41.25    3.40
   1  -6  -6   45.50    3.44
   1  -6  -6   43.86    3.36
  -1  -6   6   38.25    3.39
   1  -6  -6   39.47    3.35
  -1  -6   6   37.90    3.36
   1   6  -4   42.82    3.42
  -1   6   4   39.71    3.44
  -1   6   4   40.09    3.44
  -1   6   4   42.69    3.46
   1   6  -4   39.27    3.43
  -1   6   4   43.41    3.42
   1   6  -4   42.78    3.43
  -1   6   4   41.03    3.44
  -1   6   4   45.04    3.45
  -1   6   4   43.01    3.43
  -1   6   4   44.09    3.45
   1   6  -4   41.67    3.40
   1   6  -4   41.84    3.42
  -1   6   4   42.30    3.45
  -1   6   4   40.78    3.45
  -1  -6   4   42.01    3.41
   1  -6  -4   41.74    3.45
   1  -6  -4   42.04    3.43
   1  -6  -4   40.93    3.46
   1  -6  -4   40.32    3.41
   1  -6  -4   43.50    3.45
  -1  -6   4   42.14    3.41
   1  -6  -4   44.23    3.46
  -1  -6   4   41.36    3.42
  -1  -6   4   44.65    3.44
   1  -6  -4   43.21    3.42
   1  -6  -4   43.81    3.41
  -1  -6   4   41.69    3.44
   1  -6  -4   44.52    3.47
  -1  -6   4   41.54    3.41
   1   6  -2    7.86    0.77
  -1   6   2    5.93    0.71
  -1   6   2    5.32    0.65
   1   6  -2    6.07    0.67
  -1   6   2    7.55    0.74
  -1   6   2    5.66    0.68
  -1   6   2    5.94    0.74
  -1   6   2    5.34    0.69
   1  -6  -2    6.07    0.73
   1  -6  -2    5.37    0.67
   1  -6  -2    6.37    0.71
   1  -6  -2    8.32    0.94
   1  -6  -2    5.73    0.74
  -1  -6   2    8.00    0.65
  -1   6   0   21.63    1.51
   1   6   0   13.16    1.51
  -1   6   0   19.64    1.51
   1   6   0   13.71    1.48
   1   6   0   14.00    1.49
   1   6   0   20.51    1.57
  -1   6   0   15.11    1.46
  -1   6   0   16.69    1.59
  -1   6   0   20.63    1.52
   1   6   0   13.10    1.51
  -1   6   0   15.68    1.52
  -1  -6   0   13.91    1.51
   1  -6   0   16.24    1.52
   1  -6   0   18.80    1.47
  -1  -6   0   21.62    1.54
   1  -6   0   22.15    1.64
   1  -6   0   19.95    1.54
   1  -6   0   17.48    1.50
  -1  -6   0   16.28    1.53
  -1  -6   0   16.22    1.48
   1  -6   0   17.83    1.52
  -1  -6   0   13.23    1.52
   1  -6   0   19.39    1.48
  -1  -6   0   14.89    1.48
   1  -6   0   20.64    1.51
  -1   6  -2    7.43    0.69
   1   6   2    6.24    0.71
  -1   6  -2    6.28    0.74
   1   6   2    6.69    0.73
   1   6   2    6.30    0.73
   1   6   2    6.83    0.77
  -1   6  -2    7.49    0.76
   1   6   2    5.66    0.72
  -1   6  -2    6.79    0.77
   1   6   2    7.31    0.72
   1   6   2    7.46    0.81
  -1   6  -2    5.82    0.67
  -1  -6  -2    6.30    0.69
  -1  -6  -2    6.14    0.74
   1  -6   2    5.77    0.74
  -1  -6  -2    6.07    0.69
  -1  -6  -2    7.74    0.77
   1  -6   2    8.11    0.77
  -1  -6  -2    6.12    0.78
  -1  -6  -2    5.30    0.68
   1  -6   2    4.89    0.69
   1  -6   2    8.67    0.71
  -1  -6  -2    8.83    0.71
   1  -6   2    9.12    0.69
  -1   6  -4   45.15    3.58
  -1   6  -4   40.72    3.60
   1   6   4   44.62    3.63
   1   6   4   48.55    3.61
   1   6   4   43.41    3.61
   1   6   4   45.47    3.62
   1   6   4   39.88    3.61
  -1   6  -4   42.72    3.59
   1   6   4   47.38    3.63
   1   6   4   48.67    3.63
   1   6   4   42.38    3.62
   1   6   4   44.37    3.62
   1   6   4   39.33    3.61
   1   6   4   49.89    3.65
  -1  -6  -4   40.48    3.61
  -1  -6  -4   50.22    3.65
   1  -6   4   42.15    3.59
  -1  -6  -4   47.23    3.64
  -1  -6  -4   45.92    3.64
   1  -6   4   43.77    3.58
  -1  -6  -4   45.26    3.61
  -1  -6  -4   44.19    3.63
  -1  -6  -4   49.74    3.63
  -1  -6  -4   42.38    3.62
   1  -6   4   41.70    3.61
   1   6   6   44.77    3.64
  -1   6  -6   39.92    3.57
  -1   6  -6   42.79    3.58
  -1   6  -6   43.35    3.57
  -1   6  -6   46.07    3.58
   1   6   6   40.23    3.61
   1   6   6   46.32    3.62
   1   6   6   40.74    3.60
   1   6   6   49.63    3.58
  -1  -6  -6   42.01    3.55
   1  -6   6   47.74    3.60
   1  -6   6   44.79    3.58
  -1  -6  -6   44.68    3.62
  -1  -6  -6   47.18    3.63
  -1  -6  -6   47.55    3.57
   1  -6   6   38.43    3.59
   1  -6   6   43.02    3.57
  -1  -6  -6   45.48    3.65
   1   6   8   29.46    2.34
  -1   6  -8   26.26    2.26
   1   6   8   29.64    2.31
   1   6   8   32.15    2.37
  -1   6  -8   27.75    2.31
   1   6   8   28.70    2.32
  -1   6  -8   23.16    2.26
  -1   6  -8   29.24    2.29
  -1  -6  -8   26.97    2.33
  -1  -6  -8   26.62    2.31
   1  -6   8   28.38    2.30
  -1  -6  -8   30.29    2.46
   1  -6   8   24.54    2.25
   1  -6   8   24.75    2.27
  -1  -6  -8   23.82    2.23
  -1  -6  -8   29.24    2.26
   1   6  10   43.66    3.39
   1   6  10   41.51    3.38
  -1   6 -10   40.19    3.28
  -1   6 -10   41.51    3.33
   1   6  10   38.82    3.33
  -1   6 -10   39.25    3.36
   1  -6  10   39.21    3.34
   1  -6  10   36.38    3.30
  -1  -6 -10   38.70    3.27
  -1  -6 -10   41.83    3.37
  -1  -6 -10   40.98    3.44
   1   6  12   30.56    2.55
   1   6  12   28.43    2.53
  -1   6 -12   31.25    2.50
   1   6  12   24.32    2.45
  -1   6 -12   29.44    2.57
   1  -6  12   24.25    2.42
   1  -6  12   31.66    2.50
  -1  -6 -12   29.27    2.62
  -1  -6 -12   29.19    2.53
   1   6  14    0.52    0.43
   1   6  14    1.98    0.62
   1   6  14    1.37    0.54
  -1   6 -14    1.55    0.64
   1  -6  14    0.94    0.50
   1  -6  14    1.32    0.46
  -1  -6 -14    1.43    0.75
  -1  -6 -14    1.30    0.41
  -1  -6 -14    0.97    0.56
   1   6  16    2.06    0.66
   1   6  16    1.52    0.54
   1   6  16    1.54    0.46
   1   6  16    2.24    0.69
   1   6  16    1.84    0.67
   1  -6  16    0.76    0.63
  -1  -6 -16    2.14    0.68
   1  -6  16    1.87    0.63
  -1  -6 -16    1.76    0.84
  -1   7  17    0.44    0.60
  -1   7  17    0.32    0.59
  -1   7  17    0.18    0.47
  -1   7  17    0.51    0.50
   1  -7 -17   -0.17    0.78
   1  -7 -17    0.80    0.67
  -1  -7  17    0.26    0.60
   1  -7 -17   -0.19    0.53
   1   7 -15    0.51    0.52
  -1   7  15    1.88    0.68
  -1   7  15    2.58    0.67
  -1   7  15    2.10    0.54
  -1   7  15    2.20    0.66
   1  -7 -15    2.36    0.80
   1  -7 -15    2.03    0.47
   1  -7 -15    2.26    0.72
  -1  -7  15    1.66    0.58
   1   7 -13    3.48    0.55
  -1   7  13    1.74    0.58
  -1   7  13    1.61    0.62
  -1   7  13    1.18    0.47
  -1  -7  13    2.87    0.63
   1  -7 -13    2.08    0.71
   1  -7 -13    2.59    0.48
   1  -7 -13    2.25    0.47
   1  -7 -13    1.65    0.58
  -1   7  11    3.12    0.65
  -1   7  11    5.37    0.76
  -1   7  11    5.68    0.77
   1  -7 -11    4.99    0.80
   1  -7 -11    4.43    0.62
  -1  -7  11    4.87    0.72
  -1  -7  11    5.93    0.75
   1  -7 -11    8.63    0.82
  -1   7   9   13.77    1.31
   1   7  -9   13.86    1.29
  -1   7   9   12.29    1.38
  -1   7   9   12.16    1.34
  -1   7   9   13.17    1.33
   1   7  -9   12.59    1.24
   1  -7  -9   12.56    1.23
   1  -7  -9   13.55    1.35
  -1  -7   9   14.47    1.33
   1  -7  -9   15.16    1.24
  -1  -7   9   14.56    1.32
  -1  -7   9   12.44    1.22
   1  -7  -9   14.44    1.36
   1  -7  -9   12.56    1.41
  -1   7   7   39.02    3.19
   1   7  -7   40.19    3.21
  -1   7   7   42.08    3.27
  -1   7   7   39.27    3.23
  -1   7   7   40.73    3.27
  -1   7   7   39.53    3.23
   1   7  -7   41.08    3.20
   1  -7  -7   38.42    3.25
  -1  -7   7   34.38    3.17
   1  -7  -7   37.23    3.20
  -1  -7   7   36.92    3.18
   1  -7  -7   40.03    3.26
   1  -7  -7   37.16    3.26
  -1  -7   7   39.21    3.23
  -1  -7   7   41.15    3.24
   1  -7  -7   41.32    3.20
   1   7  -5   63.84    5.18
  -1   7   5   62.74    5.19
  -1   7   5   67.36    5.21
   1   7  -5   67.33    5.18
   1   7  -5   57.16    5.18
  -1   7   5   67.26    5.16
   1   7  -5   64.45    5.16
  -1   7   5   65.56    5.21
   1   7  -5   61.14    5.15
   1  -7  -5   61.60    5.17
  -1  -7   5   64.00    5.17
   1  -7  -5   62.50    5.16
   1  -7  -5   62.06    5.20
  -1  -7   5   61.33    5.15
  -1  -7   5   60.84    5.15
   1  -7  -5   66.81    5.16
   1  -7  -5   70.21    5.22
  -1  -7   5   66.33    5.19
   1  -7  -5   67.42    5.21
  -1  -7   5   68.37    5.20
  -1  -7   5   67.91    5.20
   1  -7  -5   64.81    5.16
  -1  -7   5   63.88    5.15
   1  -7  -5   58.18    5.17
   1   7  -3   82.83    6.55
  -1   7   3   79.25    6.54
   1   7  -3   83.95    6.53
  -1   7   3   82.14    6.54
  -1   7   3   80.06    6.56
  -1   7   3   84.18    6.55
   1   7  -3   88.26    6.54
   1   7  -3   75.98    6.54
  -1   7   3   85.63    6.56
   1   7  -3   85.36    6.52
   1   7  -3   83.15    6.50
  -1   7   3   82.28    6.53
   1   7  -3   71.50    6.54
  -1   7   3   80.51    6.54
  -1   7   3   80.76    6.54
  -1   7   3   78.90    6.56
   1  -7  -3   85.82    6.56
  -1  -7   3   78.30    6.52
  -1  -7   3   89.92    6.54
   1  -7  -3   76.72    6.56
   1  -7  -3   77.66    6.52
  -1  -7   3   82.88    6.55
   1  -7  -3   80.83    6.55
   1  -7  -3   81.46    6.56
   1  -7  -3   82.89    6.55
  -1  -7   3   83.68    6.52
  -1  -7   3   77.33    6.64
   1  -7  -3   78.40    6.54
   1  -7  -3   84.27    6.52
  -1  -7   3   83.77    6.53
   1  -7  -3   82.43    6.53
  -1   7   1   40.07    3.28
   1   7  -1   37.18    3.28
  -1   7   1   40.86    3.30
   1   7  -1   40.15    3.28
   1   7  -1   40.45    3.27
  -1   7   1   42.57    3.28
   1   7  -1   40.48    3.29
  -1   7   1   40.24    3.31
  -1   7   1   40.27    3.28
   1   7  -1   38.13    3.29
  -1   7   1   40.10    3.30
   1   7  -1   36.80    3.29
   1   7  -1   39.48    3.27
  -1   7   1   39.84    3.31
   1   7  -1   41.57    3.26
  -1   7   1   39.97    3.29
   1  -7  -1   44.24    3.46
  -1  -7   1   39.59    3.27
   1  -7  -1   40.48    3.30
   1  -7  -1   43.72    3.32
   1  -7  -1   41.75    3.28
   1  -7  -1   39.02    3.27
  -1  -7   1   39.07    3.27
   1  -7  -1   41.60    3.30
  -1  -7   1   39.57    3.28
  -1  -7   1   40.78    3.29
  -1  -7   1   39.16    3.31
   1  -7  -1   41.57    3.31
   1  -7  -1   39.85    3.31
  -1  -7   1   45.70    3.34
  -1  -7   1   40.64    3.27
  -1   7  -1   40.50    3.24
   1   7   1   40.80    3.26
   1   7   1   40.05    3.26
  -1   7  -1   40.52    3.28
  -1   7  -1   42.38    3.23
   1   7   1   39.59    3.27
   1   7   1   42.81    3.27
   1   7   1   40.19    3.28
  -1   7  -1   37.93    3.24
   1   7   1   38.73    3.28
  -1   7  -1   39.21    3.25
   1   7   1   40.32    3.28
   1   7   1   40.61    3.26
  -1   7  -1   38.16    3.29
  -1   7  -1   38.03    3.24
  -1   7  -1   37.34    3.25
   1   7   1   41.57    3.26
   1   7   1   43.44    3.24
  -1   7  -1   38.54    3.26
   1  -7   1   40.64    3.24
   1  -7   1   38.93    3.28
  -1  -7  -1   42.18    3.27
  -1  -7  -1   39.66    3.25
   1  -7   1   39.45    3.23
  -1  -7  -1   38.81    3.29
   1  -7   1   39.42    3.25
   1  -7   1   39.06    3.26
  -1  -7  -1   42.00    3.29
   1  -7   1   40.12    3.30
   1  -7   1   43.13    3.27
   1  -7   1   39.64    3.26
  -1  -7  -1   40.27    3.27
  -1  -7  -1   40.49    3.27
  -1  -7  -1   42.29    3.29
  -1  -7  -1   40.87    3.28
   1  -7   1   38.37    3.25
  -1  -7  -1   39.40    3.26
   1  -7   1   40.74    3.23
  -1  -7  -1   40.62    3.24
   1   7   3   77.05    6.62
  -1   7  -3   82.10    6.61
   1   7   3   82.57    6.64
   1   7   3   84.04    6.63
   1   7   3   78.35    6.63
  -1   7  -3   81.34    6.62
   1   7   3   81.56    6.63
   1   7   3   83.90    6.63
  -1   7  -3   86.71    6.61
   1   7   3   84.10    6.61
   1   7   3   80.90    6.60
   1   7   3   81.26    6.64
   1   7   3   83.76    6.62
   1   7   3   84.77    6.62
  -1  -7  -3   86.81    6.62
  -1  -7  -3   84.00    6.64
   1  -7   3   83.43    6.61
   1  -7   3   83.71    6.59
  -1  -7  -3   85.06    6.63
  -1  -7  -3   81.25    6.62
  -1  -7  -3   80.25    6.63
   1  -7   3   80.68    6.60
   1  -7   3   83.94    6.64
  -1  -7  -3   79.46    6.64
  -1  -7  -3   79.18    6.60
  -1  -7  -3   80.10    6.62
  -1  -7  -3   79.92    6.64
   1  -7   3   95.76    6.64
  -1  -7  -3   83.98    6.63
   1   7   5   64.07    5.13
  -1   7  -5   72.80    5.14
   1   7   5   53.40    5.14
   1   7   5   62.62    5.18
  -1   7  -5   63.99    5.14
  -1   7  -5   65.50    5.11
   1   7   5   67.18    5.17
  -1   7  -5   59.66    5.12
   1   7   5   63.61    5.17
  -1  -7  -5   64.02    5.17
   1  -7   5   65.10    5.13
  -1  -7  -5   58.69    5.17
   1  -7   5   62.95    5.12
  -1  -7  -5   66.46    5.12
  -1  -7  -5   61.39    5.12
   1  -7   5   63.85    5.11
   1  -7   5   63.56    5.16
  -1  -7  -5   62.86    5.14
   1  -7   5   70.15    5.16
  -1  -7  -5   60.89    5.17
  -1  -7  -5   67.47    5.18
   1   7   7   38.51    3.20
  -1   7  -7   39.31    3.14
   1   7   7   38.39    3.15
  -1   7  -7   41.08    3.16
   1   7   7   42.91    3.23
   1   7   7   40.67    3.23
  -1   7  -7   38.61    3.16
  -1  -7  -7   38.29    3.23
  -1  -7  -7   40.41    3.22
  -1  -7  -7   39.13    3.15
  -1  -7  -7   38.22    3.23
   1  -7   7   35.49    3.13
   1  -7   7   39.28    3.18
  -1  -7  -7   34.19    3.13
   1  -7   7   39.77    3.17
  -1  -7  -7   36.23    3.20
   1  -7   7   38.59    3.15
   1  -7   7   38.00    3.13
  -1   7  -9   13.95    1.17
   1   7   9   12.78    1.27
   1   7   9   11.90    1.24
   1   7   9   12.17    1.32
  -1   7  -9   13.55    1.19
  -1  -7  -9   12.86    1.32
  -1  -7  -9   10.65    1.13
  -1  -7  -9   12.71    1.27
   1  -7   9   11.60    1.22
  -1  -7  -9    9.40    1.18
   1  -7   9   11.97    1.18
  -1  -7  -9   13.35    1.14
   1   7  11    3.42    0.65
  -1   7 -11    2.63    0.53
   1   7  11    4.05    0.66
  -1   7 -11    4.15    0.60
  -1   7 -11    4.31    0.69
   1   7  11    2.50    0.58
   1   7  11    3.93    0.73
   1  -7  11    3.43    0.56
  -1  -7 -11    4.51    0.71
  -1  -7 -11    3.96    0.76
  -1  -7 -11    4.68    0.54
  -1  -7 -11    3.13    0.51
   1  -7  11    4.25    0.65
  -1   7 -13    2.72    0.60
   1   7  13    2.41    0.61
  -1   7 -13    3.12    0.69
   1   7  13    1.79    0.65
   1   7  13    1.99    0.56
   1  -7  13    1.70    0.47
  -1  -7 -13    1.26    0.43
  -1  -7 -13    2.55    0.72
  -1  -7 -13    3.67    0.73
   1  -7  13    2.43    0.59
   1   7  15    2.18    0.64
   1   7  15    2.00    0.66
   1   7  15    1.72    0.66
  -1  -7 -15    1.55    0.79
  -1  -7 -15    0.81    0.42
  -1  -7 -15    2.08    0.63
   1  -7  15    1.75    0.63
   1  -7  15    0.94    0.48
   1   7  17    0.46    0.57
   1   7  17    0.44    0.58
   1   7  17    0.77    0.66
   1   7  17    0.62    0.47
  -1  -7 -17    0.14    0.62
  -1  -7 -17    0.50    0.82
   1  -7  17    0.37    0.59
   1   8 -16    1.86    0.58
  -1   8  16    1.86    0.71
  -1   8  16    1.83    0.60
  -1   8  16    3.61    0.77
  -1   8  16    3.11    0.73
  -1  -8  16    2.62    0.66
   1  -8 -16    2.89    0.78
  -1  -8  16    2.38    0.71
   1  -8 -16    3.05    0.64
   1  -8 -16    2.51    0.52
   1  -8 -16    2.05    0.87
  -1   8  14    1.70    0.60
  -1  -8  14    2.17    0.64
   1  -8 -14    2.76    0.81
  -1  -8  14    1.40    0.56
   1  -8 -14    2.44    0.50
   1  -8 -14    2.27    0.66
   1   8 -12   16.73    1.62
   1   8 -12   14.74    1.59
  -1   8  12   16.84    1.70
  -1   8  12   18.40    1.69
  -1   8  12   14.00    1.66
  -1   8  12   16.88    1.63
   1  -8 -12   14.30    1.69
   1  -8 -12   17.21    1.55
   1  -8 -12   16.08    1.56
  -1  -8  12   20.03    1.69
  -1  -8  12   18.47    1.78
   1  -8 -12   17.23    1.79
   1   8 -10    8.46    0.97
  -1   8  10    9.23    1.05
  -1   8  10    8.55    1.08
  -1   8  10   11.47    1.17
   1   8 -10    8.84    1.05
  -1   8  10    9.60    1.16
  -1  -8  10    9.95    1.11
   1  -8 -10   10.50    1.21
   1  -8 -10    9.91    1.13
  -1  -8  10    9.13    1.08
   1  -8 -10    8.19    0.97
   1  -8 -10    7.73    0.92
  -1   8   8    5.34    0.73
  -1   8   8    5.20    0.68
   1   8  -8    6.14    0.68
  -1   8   8    5.29    0.71
  -1   8   8    4.54    0.75
   1   8  -8    4.49    0.60
  -1  -8   8    5.58    0.67
  -1  -8   8    5.63    0.70
   1  -8  -8    5.45    0.73
  -1  -8   8    6.78    0.82
   1  -8  -8    6.00    0.64
   1  -8  -8    5.97    0.75
   1  -8  -8    5.67    0.79
  -1   8   6   27.75    2.40
  -1   8   6   27.56    2.38
  -1   8   6   27.67    2.33
  -1   8   6   27.12    2.36
   1   8  -6   29.24    2.34
   1   8  -6   24.19    2.29
   1   8  -6   27.25    2.31
   1  -8  -6   28.76    2.40
  -1  -8   6   26.24    2.35
  -1  -8   6   26.56    2.30
   1  -8  -6   27.57    2.31
   1  -8  -6   26.84    2.39
  -1  -8   6   31.75    2.37
  -1  -8   6   29.36    2.37
   1  -8  -6   31.47    2.40
   1   8  -4  144.35   10.68
  -1   8   4  138.35   10.69
   1   8  -4  128.44   10.67
   1   8  -4  129.57   10.65
  -1   8   4  139.74   10.67
  -1   8   4  129.10   10.66
  -1   8   4  129.54   10.70
   1   8  -4  132.74   10.65
  -1   8   4  135.77   10.69
  -1   8   4  115.54   10.68
   1   8  -4  134.30   10.65
  -1  -8   4  134.54   10.69
   1  -8  -4  132.61   10.67
  -1  -8   4  128.18   10.66
  -1  -8   4  143.45   10.67
   1  -8  -4  132.96   10.69
  -1  -8   4  138.87   10.65
   1  -8  -4  141.48   10.71
   1  -8  -4  132.58   10.69
  -1  -8   4  140.23   10.70
   1  -8  -4  130.46   10.66
  -1   8   2   56.88    4.82
   1   8  -2   63.23    4.79
   1   8  -2   63.14    4.81
  -1   8   2   58.18    4.83
  -1   8   2   58.01    4.80
  -1   8   2   57.71    4.79
  -1   8   2   56.72    4.80
   1   8  -2   63.08    4.79
   1   8  -2   61.42    4.82
  -1   8   2   57.96    4.82
   1   8  -2   60.63    4.79
  -1   8   2   60.16    4.79
  -1   8   2   57.64    4.80
  -1   8   2   55.97    4.79
   1   8  -2   62.09    4.79
   1   8  -2   62.49    4.79
  -1   8   2   59.71    4.81
   1   8  -2   60.24    4.79
   1  -8  -2   61.18    4.81
   1  -8  -2   56.29    4.82
  -1  -8   2   60.49    4.80
  -1  -8   2   61.39    4.78
  -1  -8   2   62.22    4.80
   1  -8  -2   57.62    4.79
  -1  -8   2   60.68    4.83
  -1  -8   2   61.37    4.79
  -1  -8   2   59.61    4.79
  -1  -8   2   62.09    4.79
   1  -8  -2   58.33    4.82
   1  -8  -2   60.37    4.81
   1  -8  -2   57.93    4.83
   1  -8  -2   56.01    4.79
  -1  -8   2   62.64    4.83
   1  -8  -2   58.69    4.79
   1  -8  -2   52.28    4.80
  -1   8   0    4.21    0.53
   1   8   0    4.30    0.50
   1   8   0    3.47    0.50
  -1   8   0    3.57    0.49
   1   8   0    4.72    0.50
  -1   8   0    3.51    0.44
   1   8   0    3.57    0.51
  -1   8   0    3.83    0.48
  -1   8   0    4.22    0.48
   1   8   0    3.81    0.46
   1   8   0    3.81    0.47
  -1   8   0    4.04    0.46
   1   8   0    3.60    0.51
  -1   8   0    3.27    0.51
  -1   8   0    2.97    0.49
   1   8   0    3.47    0.44
   1   8   0    3.55    0.45
   1  -8   0    3.59    0.51
  -1  -8   0    3.96    0.53
  -1  -8   0    3.06    0.53
   1  -8   0    4.17    0.48
  -1  -8   0    3.11    0.47
   1  -8   0    3.44    0.43
   1  -8   0    4.12    0.46
  -1  -8   0    2.96    0.43
   1  -8   0    3.85    0.56
   1  -8   0    3.32    0.48
   1  -8   0    3.95    0.50
   1  -8   0    3.21    0.45
   1  -8   0    4.37    0.52
  -1  -8   0    3.43    0.43
  -1  -8   0    3.49    0.49
  -1  -8   0    2.76    0.45
  -1  -8   0    4.10    0.48
  -1  -8   0    3.90    0.50
  -1   8  -2   63.99    4.79
   1   8   2   53.45    4.80
   1   8   2   53.11    4.80
   1   8   2   59.60    4.81
   1   8   2   56.45    4.81
  -1   8  -2   65.99    4.80
  -1   8  -2   62.65    4.79
  -1   8  -2   65.14    4.76
  -1   8  -2   59.84    4.77
   1   8   2   55.79    4.78
   1   8   2   54.76    4.82
   1   8   2   55.60    4.82
   1   8   2   54.71    4.80
   1   8   2   57.13    4.79
  -1   8  -2   63.65    4.77
   1   8   2   55.52    4.79
  -1   8  -2   63.66    4.82
   1  -8   2   64.71    4.78
   1  -8   2   66.15    4.77
   1  -8   2   60.66    4.82
   1  -8   2   65.78    4.85
  -1  -8  -2   52.02    4.80
  -1  -8  -2   58.90    4.81
  -1  -8  -2   56.80    4.82
   1  -8   2   64.28    4.79
  -1  -8  -2   59.07    4.81
  -1  -8  -2   55.08    4.82
   1  -8   2   63.08    4.79
   1  -8   2   64.72    4.80
   1  -8   2   62.32    4.78
  -1  -8  -2   57.19    4.79
  -1  -8  -2   58.23    4.81
   1  -8   2   62.08    4.80
  -1  -8  -2   56.19    4.80
  -1  -8  -2   56.21    4.83
   1   8   4  147.04   10.76
   1   8   4  131.84   10.74
  -1   8  -4  131.89   10.72
   1   8   4  115.48   10.75
   1   8   4  135.78   10.73
  -1   8  -4  135.68   10.74
  -1   8  -4  140.88   10.71
   1   8   4  131.65   10.76
  -1   8  -4  129.78   10.70
   1   8   4  133.02   10.72
  -1   8  -4  133.66   10.72
   1  -8   4  143.87   10.71
  -1  -8  -4  128.62   10.75
  -1  -8  -4  119.93   10.71
   1  -8   4  142.04   10.76
   1  -8   4  138.91   10.71
  -1  -8  -4  136.17   10.74
   1  -8   4  144.78   10.72
  -1  -8  -4  131.54   10.75
   1  -8   4  138.09   10.75
  -1  -8  -4  138.06   10.75
  -1  -8  -4  135.62   10.75
   1  -8   4  134.54   10.73
   1   8   6   27.25    2.28
   1   8   6   25.70    2.27
   1   8   6   29.34    2.28
   1   8   6   25.85    2.22
  -1   8  -6   23.44    2.21
  -1   8  -6   23.01    2.21
  -1   8  -6   26.87    2.19
  -1   8  -6   31.44    2.24
  -1  -8  -6   27.20    2.28
  -1  -8  -6   24.99    2.28
   1  -8   6   28.86    2.23
   1  -8   6   30.56    2.26
  -1  -8  -6   26.47    2.21
  -1  -8  -6   21.79    2.24
  -1  -8  -6   27.94    2.27
   1  -8   6   24.03    2.18
   1   8   8    6.36    0.79
  -1   8  -8    5.68    0.66
   1   8   8    5.52    0.76
   1   8   8    5.46    0.79
   1  -8   8    6.49    0.80
   1  -8   8    6.63    0.75
  -1  -8  -8    6.01    0.83
  -1  -8  -8    6.64    0.83
  -1  -8  -8    8.23    0.89
   1  -8   8    4.99    0.67
  -1  -8  -8    7.19    0.73
   1   8  10   11.56    1.08
   1   8  10   11.44    1.20
   1   8  10    9.28    1.12
  -1   8 -10   10.44    1.03
   1   8  10    9.30    1.09
  -1   8 -10    8.99    1.00
  -1  -8 -10    8.89    1.12
   1  -8  10    7.99    1.06
  -1  -8 -10    6.84    1.07
  -1  -8 -10    8.12    1.04
   1  -8  10   10.44    1.03
  -1  -8 -10    9.30    0.96
  -1  -8 -10    7.47    0.93
  -1   8 -12   20.57    1.72
   1   8  12   16.55    1.78
  -1   8 -12   18.01    1.96
   1   8  12   21.90    1.93
   1   8  12   19.07    1.86
   1   8  12   18.35    1.88
  -1  -8 -12   17.39    1.71
  -1  -8 -12   19.57    1.95
  -1  -8 -12   17.00    1.70
  -1  -8 -12   20.88    1.88
   1  -8  12   20.02    1.83
   1  -8  12   21.49    1.77
   1   8  14    1.73    0.65
   1   8  14    1.78    0.62
   1   8  14    2.93    0.71
   1   8  14    1.94    0.56
   1  -8  14    2.33    0.60
  -1  -8 -14    1.84    0.46
  -1  -8 -14    2.56    0.81
   1  -8  14    1.24    0.50
   1   8  16    2.14    0.72
   1   8  16    1.48    0.60
   1   8  16    3.00    0.73
   1   8  16    2.13    0.79
   1  -8  16    3.63    0.74
  -1  -8 -16    3.44    0.80
  -1  -8 -16    2.40    0.53
  -1  -8 -16    3.28    0.95
  -1   9  15    0.49    0.58
   1   9 -15    1.98    0.55
  -1   9  15    1.19    0.62
  -1   9  15    0.99    0.53
   1  -9 -15    1.04    0.46
   1  -9 -15    1.20    0.72
   1  -9 -15    1.39    0.64
  -1  -9  15    1.51    0.60
   1  -9 -15    0.96    0.42
  -1  -9  15    1.56    0.58
  -1   9  13    1.81    0.90
   1   9 -13    1.28    0.49
  -1   9  13    0.71    0.50
  -1   9  13    0.78    0.59
   1  -9 -13    1.22    0.41
   1  -9 -13    0.91    0.67
  -1  -9  13    0.65    0.49
   1  -9 -13    0.78    0.41
  -1  -9  13    0.50    0.49
   1   9 -11    7.95    0.86
   1   9 -11    6.83    0.83
  -1   9  11    5.87    0.90
  -1   9  11    7.56    0.92
  -1   9  11    5.77    0.83
  -1   9  11    8.46    0.99
  -1  -9  11    7.20    0.88
   1  -9 -11    6.29    0.76
   1  -9 -11    5.76    0.75
   1  -9 -11    5.92    0.94
  -1  -9  11    6.90    0.96
   1  -9 -11    6.80    0.96
   1   9  -9    3.29    0.52
  -1   9   9    3.37    0.64
  -1   9   9    2.78    0.53
  -1   9   9    2.76    0.46
   1   9  -9    2.51    0.44
  -1   9   9    2.05    0.52
   1  -9  -9    2.78    0.61
   1  -9  -9    2.58    0.61
   1  -9  -9    3.50    0.63
  -1  -9   9    3.01    0.56
  -1  -9   9    1.41    0.78
   1  -9  -9    2.63    0.44
  -1   9   7    4.50    0.61
  -1   9   7    5.28    0.71
   1   9  -7    5.40    0.65
   1   9  -7    4.52    0.58
  -1   9   7    5.56    0.75
  -1   9   7    4.64    0.67
   1  -9  -7    5.79    0.72
  -1  -9   7    5.35    0.63
  -1  -9   7    5.06    0.66
   1  -9  -7    6.77    0.80
   1  -9  -7    4.62    0.71
  -1  -9   7    5.60    0.67
  -1  -9   7    5.69    0.70
   1  -9  -7    4.96    0.59
   1   9  -5   21.66    1.82
  -1   9   5   20.20    1.91
   1   9  -5   18.11    1.79
  -1   9   5   23.00    1.89
  -1   9   5   20.71    1.84
   1  -9  -5   18.95    1.88
   1  -9  -5   18.02    1.80
  -1  -9   5   22.50    1.88
   1  -9  -5   24.00    1.88
   1  -9  -5   24.53    1.92
  -1  -9   5   26.37    1.92
   1  -9  -5   19.81    1.88
   1   9  -3   49.65    4.64
   1   9  -3   57.65    4.67
  -1   9   3   59.94    4.69
   1   9  -3   56.43    4.66
   1   9  -3   62.38    4.69
  -1   9   3   56.52    4.70
   1   9  -3   64.31    4.69
  -1   9   3   56.72    4.71
  -1   9   3   58.09    4.68
   1   9  -3   50.36    4.74
  -1   9   3   54.84    4.72
   1   9  -3   66.56    4.71
  -1   9   3   59.51    4.68
  -1  -9   3   65.11    4.68
  -1  -9   3   51.57    4.66
   1  -9  -3   56.20    4.72
  -1  -9   3   60.56    4.74
   1  -9  -3   53.09    4.71
   1  -9  -3   56.87    4.73
  -1  -9   3   55.37    4.67
  -1  -9   3   66.73    4.74
  -1  -9   3   60.89    4.69
   1   9  -1   11.40    1.19
   1   9  -1   14.49    1.21
  -1   9   1   13.52    1.22
   1   9  -1   14.68    1.18
  -1   9   1   13.38    1.26
   1   9  -1   14.52    1.24
  -1   9   1   13.21    1.24
  -1   9   1   11.60    1.20
  -1   9   1   12.02    1.22
  -1   9   1   14.79    1.20
   1   9  -1   13.93    1.18
   1   9  -1   13.68    1.22
  -1   9   1   11.47    1.22
   1   9  -1   10.95    1.20
   1   9  -1   11.98    1.22
  -1   9   1   12.84    1.19
   1   9  -1   14.43    1.25
  -1  -9   1   13.51    1.28
   1  -9  -1   12.77    1.27
   1  -9  -1   13.16    1.30
   1  -9  -1   14.80    1.19
   1  -9  -1   13.72    1.23
  -1  -9   1   10.83    1.28
  -1  -9   1   14.98    1.21
  -1  -9   1   12.83    1.20
   1  -9  -1   14.44    1.21
  -1  -9   1   13.01    1.23
  -1  -9   1   13.48    1.21
   1   9   1   11.66    1.23
  -1   9  -1   12.01    1.15
   1   9   1   12.11    1.19
   1   9   1   12.98    1.19
   1   9   1   12.33    1.22
   1   9   1   11.94    1.12
  -1   9  -1   13.11    1.15
  -1   9  -1   12.34    1.18
  -1   9  -1   13.30    1.18
   1   9   1   12.02    1.19
   1   9   1   14.31    1.17
  -1   9  -1   14.70    1.13
  -1   9  -1   13.40    1.17
  -1   9  -1   12.75    1.13
  -1  -9  -1   12.05    1.26
   1  -9   1   12.88    1.19
  -1  -9  -1   11.38    1.23
  -1  -9  -1   12.75    1.22
   1  -9   1   14.29    1.16
  -1  -9  -1   11.61    1.19
   1  -9   1   11.55    1.17
  -1  -9  -1   12.16    1.18
   1  -9   1   13.47    1.14
  -1  -9  -1   11.07    1.26
   1  -9   1   11.94    1.26
   1  -9   1   13.72    1.11
   1  -9   1   14.05    1.17
   1  -9   1   12.25    1.13
   1   9   3   54.18    4.77
  -1   9  -3   55.00    4.71
   1   9   3   68.08    4.78
   1   9   3   58.90    4.73
  -1   9  -3   58.92    4.71
  -1   9  -3   62.00    4.74
   1   9   3   53.59    4.73
  -1   9  -3   60.01    4.72
   1   9   3   62.29    4.73
  -1   9  -3   52.93    4.70
   1   9   3   59.02    4.74
   1  -9   3   60.28    4.76
  -1  -9  -3   60.01    4.73
   1  -9   3   58.25    4.71
  -1  -9  -3   55.43    4.75
  -1  -9  -3   52.24    4.76
  -1  -9  -3   67.70    4.77
  -1  -9  -3   60.77    4.78
   1  -9   3   52.14    4.70
   1  -9   3   55.27    4.71
   1  -9   3   62.32    4.73
   1  -9   3   61.31    4.79
   1  -9   3   58.21    4.72
  -1   9  -5   19.09    1.93
  -1   9  -5   21.65    1.95
  -1   9  -5   25.37    1.99
   1  -9   5   21.03    1.94
  -1  -9  -5   26.32    2.05
   1  -9   5   23.13    2.02
   1  -9   5   28.09    2.05
  -1   9  -7    4.37    0.60
   1   9   7    4.48    0.66
   1   9   7    4.71    0.71
  -1   9  -7    5.59    0.56
   1   9   7    4.74    0.71
   1   9   7    4.64    0.60
  -1  -9  -7    4.45    0.66
  -1  -9  -7    4.79    0.57
   1  -9   7    5.59    0.62
   1  -9   7    4.90    0.64
   1  -9   7    4.28    0.61
  -1  -9  -7    4.58    0.70
   1   9   9    2.12    0.51
   1   9   9    2.29    0.48
   1   9   9    2.95    0.60
  -1   9  -9    2.54    0.49
   1   9   9    3.21    0.63
   1   9   9    2.62    0.51
  -1  -9  -9    3.12    0.46
  -1  -9  -9    2.41    0.59
   1  -9   9    1.57    0.50
   1  -9   9    3.02    0.53
  -1  -9  -9    2.86    0.59
  -1  -9  -9    2.41    0.57
   1   9  11    5.85    0.87
   1   9  11    5.44    0.79
  -1   9 -11    4.71    0.71
   1   9  11    7.49    0.94
  -1   9 -11    5.25    0.71
   1   9  11    6.27    0.93
   1  -9  11    7.35    0.85
   1  -9  11    6.14    0.79
  -1  -9 -11    5.08    0.67
  -1  -9 -11    6.39    0.91
  -1  -9 -11    7.09    0.97
  -1  -9 -11    6.45    0.71
   1   9  13    0.53    0.72
   1   9  13    1.15    0.58
  -1   9 -13    1.13    0.47
   1   9  13    0.34    0.43
   1   9  13    0.94    0.64
  -1  -9 -13    0.03    0.57
  -1  -9 -13    0.52    0.65
   1  -9  13    0.44    0.48
  -1  -9 -13    0.99    0.41
   1  -9  13    0.95    0.50
  -1  -9 -13    0.44    0.39
   1   9  15    1.86    0.72
   1   9  15    1.58    0.63
   1   9  15    1.18    0.59
   1   9  15    1.21    0.56
   1  -9  15    0.55    0.67
  -1  -9 -15    2.09    0.80
   1  -9  15    1.35    0.55
  -1  -9 -15    1.25    0.69
  -1  -9 -15    1.04    0.44
  -1  10  16    4.10    0.83
   1  10 -16    3.51    0.65
  -1  10  16    3.55    0.85
  -1  10  16    2.39    0.89
   1 -10 -16    1.94    0.78
  -1 -10  16    2.80    0.77
   1 -10 -16    2.62    0.92
  -1 -10  16    3.39    0.75
   1 -10 -16    1.84    0.54
   1 -10 -16    2.45    0.59
   1  10 -14    1.47    0.55
  -1  10  14    0.74    0.56
  -1  10  14    0.98    0.53
  -1  10  14    1.31    0.65
  -1 -10  14    0.89    0.57
   1 -10 -14    1.41    0.66
   1 -10 -14    1.71    0.74
  -1 -10  14    1.91    0.61
   1 -10 -14    0.98    0.47
   1 -10 -14    1.23    0.46
   1  10 -12   15.75    1.46
  -1  10  12   15.09    1.59
  -1  10  12   15.02    1.68
  -1  10  12   13.60    1.55
   1  10 -12   16.49    1.53
  -1  10  12   14.56    1.62
   1 -10 -12   15.14    1.65
   1 -10 -12   16.16    1.50
   1 -10 -12   15.64    1.46
   1 -10 -12   15.62    1.98
  -1 -10  12   15.32    1.56
  -1 -10  12   14.98    1.59
  -1  10  10   12.72    1.44
   1  10 -10   12.99    1.54
   1  10 -10   12.19    1.22
  -1  10  10   12.52    1.35
  -1  10  10   10.43    1.28
  -1  10  10   12.08    1.43
   1 -10 -10   14.93    1.26
   1 -10 -10   13.57    1.39
  -1 -10  10   12.31    1.46
   1 -10 -10   14.50    1.45
   1 -10 -10   11.80    1.22
  -1 -10  10   11.81    1.33
   1 -10 -10    9.25    1.27
  -1  10   8    8.14    0.95
   1  10  -8    7.34    0.84
  -1  10   8    6.95    0.84
   1  10  -8    6.13    0.77
  -1  10   8    8.88    0.84
  -1  10   8    8.70    0.93
  -1  10   8    9.24    0.98
  -1 -10   8    7.78    0.98
   1 -10  -8    6.63    0.77
   1 -10  -8    6.05    0.89
  -1 -10   8    7.08    0.80
  -1 -10   8    7.02    0.89
  -1 -10   8    7.02    0.85
   1 -10  -8    6.87    0.94
   1 -10  -8    7.09    1.04
   1  10  -6    5.88    0.59
  -1  10   6    3.98    0.68
  -1  10   6    3.88    0.64
   1  10  -6    6.16    0.65
  -1  10   6    5.07    0.60
   1 -10  -6    4.82    0.67
  -1 -10   6    4.53    0.58
  -1 -10   6    5.20    0.63
  -1 -10   6    6.00    0.70
   1 -10  -6    5.74    0.72
  -1 -10   6    4.45    0.53
   1 -10  -6    4.17    0.60
  -1 -10   6    4.67    0.65
   1 -10  -6    3.97    0.55
   1  10  -4   92.48    7.06
   1  10  -4   90.05    7.09
  -1  10   4   86.12    7.08
  -1  10   4   83.30    7.11
   1  10  -4   90.36    7.07
  -1  10   4   76.24    7.10
  -1  10   4   85.03    7.10
   1 -10  -4   86.16    7.11
  -1 -10   4  101.71    7.10
  -1 -10   4   83.68    7.06
   1 -10  -4   88.89    7.11
  -1 -10   4   94.38    7.14
  -1 -10   4   91.74    7.07
  -1 -10   4   92.53    7.12
   1 -10  -4   83.40    7.08
   1 -10  -4   86.24    7.07
  -1  10   2   42.58    3.35
  -1  10   2   42.64    3.40
  -1  10   2   42.63    3.40
   1  10  -2   41.59    3.37
  -1  10   2   41.58    3.36
   1  10  -2   41.40    3.32
   1  10  -2   42.75    3.36
  -1  10   2   42.01    3.37
   1  10  -2   44.55    3.38
  -1  10   2   44.98    3.37
   1  10  -2   39.40    3.35
   1  10  -2   41.65    3.35
   1 -10  -2   40.58    3.42
  -1 -10   2   41.86    3.34
  -1 -10   2   38.77    3.34
  -1 -10   2   38.99    3.43
  -1 -10   2   41.54    3.41
  -1 -10   2   34.50    3.34
   1 -10  -2   38.13    3.36
   1 -10  -2   39.57    3.40
  -1 -10   2   36.55    3.39
   1 -10  -2   42.62    3.38
   1  10   0    0.46    1.15
   1 -10   0    0.64    1.44
  -1 -10   0    1.21    1.41
   1 -10   0    1.52    1.38
   1  10   2   44.34    3.38
  -1  10  -2   37.14    3.32
   1  10   2   39.06    3.33
  -1  10  -2   41.16    3.35
  -1  10  -2   42.39    3.34
   1  10   2   39.26    3.39
  -1  10  -2   40.58    3.31
   1  10   2   36.69    3.35
  -1  10  -2   38.78    3.32
  -1  10  -2   43.21    3.37
   1  10   2   41.14    3.36
  -1  10  -2   45.40    3.31
   1  10   2   36.86    3.39
  -1 -10  -2   39.61    3.37
   1 -10   2   42.52    3.40
  -1 -10  -2   41.68    3.40
   1 -10   2   44.26    3.37
   1 -10   2   42.14    3.32
   1 -10   2   41.30    3.43
   1 -10   2   41.33    3.34
  -1 -10  -2   40.51    3.37
  -1 -10  -2   39.06    3.38
   1 -10   2   40.97    3.33
  -1 -10  -2   39.39    3.42
   1  10   4   84.41    7.13
   1  10   4   85.49    7.18
   1  10   4   87.88    7.13
  -1  10  -4   91.17    7.12
  -1  10  -4   82.44    7.13
   1  10   4   94.14    7.18
  -1  10  -4   92.43    7.14
  -1  10  -4   85.31    7.12
   1 -10   4   96.90    7.19
  -1 -10  -4   96.54    7.17
  -1 -10  -4   88.96    7.18
   1 -10   4   89.00    7.11
   1 -10   4   84.04    7.13
  -1 -10  -4   90.16    7.15
  -1 -10  -4   85.52    7.17
  -1 -10  -4   90.27    7.18
   1 -10   4   89.88    7.17
   1  10   6    5.17    0.66
   1  10   6    5.66    0.72
   1  10   6    3.17    0.55
  -1  10  -6    4.93    0.60
  -1  10  -6    6.06    0.62
   1 -10   6    5.11    0.59
  -1 -10  -6    4.30    0.54
   1 -10   6    5.47    0.66
  -1 -10  -6    4.33    0.62
   1 -10   6    3.95    0.63
  -1 -10  -6    4.81    0.99
  -1 -10  -6    4.63    0.68
  -1 -10  -6    4.19    0.64
   1  10   8    6.64    0.94
   1  10   8    6.59    0.80
  -1  10  -8    7.87    0.80
   1  10   8    6.63    0.87
  -1  10  -8    8.35    0.92
  -1 -10  -8    6.90    0.89
   1 -10   8    8.16    0.93
  -1 -10  -8    6.77    0.87
  -1 -10  -8    7.11    0.91
  -1 -10  -8    7.26    0.94
   1 -10   8    6.67    0.88
   1  10  10   13.07    1.34
  -1  10 -10   13.45    1.37
   1  10  10   14.30    1.52
   1  10  10   13.46    1.57
   1  10  10   13.73    1.45
   1  10  10   13.34    1.41
   1 -10  10   15.52    1.42
  -1 -10 -10   13.49    1.46
   1 -10  10   15.19    1.82
  -1 -10 -10   11.61    1.28
  -1 -10 -10   13.20    1.48
  -1 -10 -10   14.14    1.55
  -1  10 -12   15.32    1.43
  -1  10 -12   14.44    1.44
   1  10  12   15.09    1.55
   1  10  12   14.51    1.65
   1  10  12   12.87    1.46
   1  10  12   15.57    1.57
   1 -10  12   14.63    1.49
  -1 -10 -12   11.54    1.34
  -1 -10 -12   12.28    1.66
  -1 -10 -12   15.03    1.57
   1 -10  12   15.44    1.47
  -1 -10 -12   12.93    1.34
   1  10  14    1.16    0.53
   1  10  14    2.42    0.68
   1  10  14    1.99    0.73
   1  10  14    1.60    0.65
  -1  10 -14    0.90    0.57
  -1 -10 -14    1.11    0.65
   1 -10  14    0.80    0.54
  -1 -10 -14    1.36    0.44
  -1 -10 -14    2.83    0.80
   1 -10  14    1.45    0.56
   1  10  16    3.10    0.71
   1  10  16    2.73    0.89
   1  10  16    2.07    0.74
  -1 -10 -16    4.48    1.19
   1 -10  16    2.83    0.70
  -1 -10 -16    1.74    0.78
  -1 -10 -16    2.74    0.95
   1  11 -15    0.51    0.54
  -1  11  15    0.22    0.50
  -1  11  15    1.07    0.66
  -1  11  15    1.10    0.60
  -1 -11  15    0.42    0.61
  -1 -11  15    0.25    0.53
   1 -11 -15    0.96    0.76
   1 -11 -15    0.83    0.48
   1 -11 -15    1.79    0.49
   1  11 -13    2.93    0.60
  -1  11  13    4.98    0.85
  -1  11  13    3.52    0.75
  -1  11  13    4.94    0.90
   1  11 -13    4.01    0.68
  -1 -11  13    3.62    0.70
  -1 -11  13    4.53    0.76
   1 -11 -13    3.60    0.61
   1 -11 -13    3.27    0.87
   1 -11 -13    6.86    1.07
   1 -11 -13    3.71    0.63
  -1  11  11    0.14    0.49
  -1  11  11   -0.11    0.51
  -1  11  11    1.00    0.62
  -1  11  11    1.88    0.46
   1  11 -11    0.98    0.39
   1  11 -11    0.15    0.45
   1 -11 -11   -0.17    0.33
   1 -11 -11    0.37    0.40
  -1 -11  11    0.18    0.41
   1 -11 -11    0.55    0.54
  -1 -11  11    0.44    0.51
   1 -11 -11    0.13    0.55
   1 -11 -11    0.78    0.54
  -1  11   9    3.34    0.60
  -1  11   9    3.18    0.58
  -1  11   9    3.40    0.69
   1  11  -9    3.98    0.55
   1  11  -9    4.17    0.73
  -1  11   9    3.19    0.68
  -1  11   9    3.57    0.66
   1 -11  -9    3.41    0.53
  -1 -11   9    4.78    1.23
  -1 -11   9    4.42    0.64
   1 -11  -9    3.78    0.68
   1 -11  -9    2.57    0.67
   1 -11  -9    4.22    0.71
  -1  11   7   15.56    1.36
  -1  11   7   11.76    1.25
   1  11  -7   12.27    1.24
  -1  11   7   11.38    1.34
  -1  11   7   10.82    1.23
   1  11  -7   12.56    1.18
   1 -11  -7   10.89    1.15
   1 -11  -7   12.38    1.29
  -1 -11   7   11.66    1.31
  -1 -11   7   11.73    1.15
  -1 -11   7   13.77    1.25
  -1 -11   7   12.18    1.32
  -1  11   5    0.47    0.43
   1  11  -5    0.09    0.33
   1  11  -5    0.79    0.30
   1  11  -5    0.25    0.31
  -1  11   5    0.52    0.34
  -1  11   5   -0.27    0.32
  -1  11   5    0.38    0.35
   1 -11  -5    0.08    0.39
  -1 -11   5    0.75    0.35
   1 -11  -5    0.95    0.30
   1 -11  -5    0.46    0.37
   1 -11  -5    0.45    0.38
   1 -11  -5    0.12    0.41
  -1 -11   5    0.78    0.40
  -1 -11   5    1.04    0.30
  -1 -11   5    0.46    0.28
  -1 -11   5   -0.04    0.37
  -1  11   3    0.68    0.34
  -1  11   1    1.74    0.53
   1  11  -1    4.75    0.47
  -1  11   1    2.45    0.44
  -1  11   1    2.35    0.51
   1  11  -1    2.89    0.54
   1  11  -1    3.61    0.55
   1  11  -1    3.05    0.51
   1  11  -1    3.43    0.55
  -1  11   1    1.31    0.54
  -1  11   1    1.48    0.52
   1 -11  -1    3.21    0.60
  -1 -11   1    3.17    0.58
  -1 -11   1    2.83    0.50
   1 -11  -1    1.81    0.48
  -1 -11   1    3.58    0.57
  -1 -11   1    2.38    0.63
   1 -11  -1    2.83    0.52
  -1 -11   1    4.16    0.64
  -1  11  -1    2.52    0.48
  -1  11  -1    2.43    0.50
  -1  11  -1    3.85    0.42
  -1  11  -1    2.36    0.49
   1  11   1    0.92    0.48
   1  11   1    0.80    0.52
   1  11   1    0.84    0.49
  -1  11  -1    3.21    0.42
   1  11   1    0.89    0.66
   1  11   1    2.97    0.42
   1  11   1    1.46    0.48
  -1 -11  -1    1.26    0.47
   1 -11   1    2.87    0.46
   1 -11   1    2.79    0.49
   1 -11   1    3.92    0.61
   1 -11   1    0.96    0.57
  -1 -11  -1    2.29    0.51
  -1 -11  -1    0.08    0.57
   1 -11   1    2.38    0.44
  -1 -11  -1    1.72    0.55
   1  11   3    0.75    0.34
   1  11   5    0.01    0.36
   1  11   5    0.52    0.34
   1  11   5    0.70    0.32
  -1  11  -5    0.24    0.26
  -1  11  -5   -0.26    0.24
   1  11   5    0.48    0.34
   1  11   5    0.35    0.40
  -1  11  -5    0.15    0.31
  -1  11  -5   -0.10    0.20
   1 -11   5    0.15    0.37
  -1 -11  -5    0.71    0.37
   1 -11   5    0.08    0.33
  -1 -11  -5    0.38    0.43
  -1 -11  -5    0.31    0.36
  -1 -11  -5    0.16    0.35
   1 -11   5    0.61    0.37
  -1  11  -7   11.71    1.24
   1  11   7   13.41    1.39
   1  11   7   11.78    1.26
  -1  11  -7   12.49    1.17
   1  11   7   11.30    1.25
   1  11   7   15.18    1.37
  -1 -11  -7   11.40    1.24
  -1 -11  -7   12.91    1.34
   1 -11   7   13.99    1.31
  -1 -11  -7   11.97    1.30
   1 -11   7   10.97    1.22
  -1 -11  -7   11.54    1.28
   1 -11   7   13.59    1.31
  -1  11  -9    2.42    0.53
  -1  11  -9    2.43    0.47
   1  11   9    3.59    0.69
   1  11   9    3.03    0.59
   1  11   9    3.70    0.73
   1 -11   9    3.43    0.60
  -1 -11  -9    3.34    0.66
   1 -11   9    3.22    0.58
  -1 -11  -9    3.19    0.67
  -1 -11  -9    2.66    0.50
  -1 -11  -9    3.18    0.65
  -1  11 -11    0.57    0.91
   1  11  11    0.14    0.49
   1  11  11    1.53    0.61
   1  11  11    0.62    0.44
   1  11  11    0.34    0.59
   1  11  11    0.78    0.44
  -1 -11 -11    0.68    0.35
  -1 -11 -11    0.78    0.53
   1 -11  11    0.14    0.43
  -1 -11 -11    0.02    0.57
   1 -11  11    0.20    0.47
  -1 -11 -11    0.32    0.47
   1  11  13    4.49    0.82
   1  11  13    4.17    0.72
   1  11  13    3.52    0.87
  -1  11 -13    3.85    0.65
   1  11  13    4.85    0.85
   1 -11  13    3.24    0.68
   1 -11  13    4.28    0.72
  -1 -11 -13    3.91    0.81
  -1 -11 -13    3.49    0.84
  -1 -11 -13    4.19    0.66
  -1 -11 -13    2.98    0.56
  -1  11 -15    0.37    0.48
   1  11  15    1.44    0.64
   1  11  15    0.94    0.56
   1  11  15    0.43    0.69
  -1 -11 -15    0.83    0.69
  -1 -11 -15    1.24    0.74
  -1 -11 -15    1.42    0.49
   1 -11  15    1.27    0.57
   1 -11  15    0.78    0.86
  -1  12  14    5.71    0.99
  -1  12  14    4.44    0.91
   1  12 -14    2.96    0.64
  -1  12  14    4.06    0.81
   1  12 -14    5.63    0.79
  -1 -12  14    4.06    0.91
   1 -12 -14    5.04    0.74
  -1 -12  14    5.51    0.88
   1 -12 -14    5.01    0.75
   1 -12 -14    5.20    1.05
   1 -12 -14    5.67    1.03
   1  12 -12    2.96    0.65
  -1  12  12    4.08    0.72
  -1  12  12    4.55    0.86
  -1  12  12    4.09    0.80
   1  12 -12    3.46    0.59
  -1  12  12    4.57    0.83
   1 -12 -12    4.92    0.90
   1 -12 -12    2.95    0.78
   1 -12 -12    4.03    0.65
  -1 -12  12    4.32    0.72
  -1 -12  12    4.12    0.77
   1 -12 -12    4.73    0.86
   1 -12 -12    4.62    0.63
  -1  12  10    0.47    0.42
   1  12 -10    0.33    0.44
   1  12 -10    0.43    0.40
  -1  12  10    2.99    0.69
  -1  12  10    0.54    0.50
  -1  12  10    1.10    0.59
  -1  12  10    0.99    0.42
   1 -12 -10    0.71    0.37
   1 -12 -10    0.51    0.52
   1 -12 -10    1.06    0.59
   1 -12 -10    0.77    0.54
  -1 -12  10   -0.09    0.50
  -1 -12  10    0.18    0.44
  -1  12   8    9.92    1.14
  -1  12   8    9.06    1.11
   1  12  -8   10.51    1.32
  -1  12   8   10.04    1.14
  -1  12   8   10.92    1.28
  -1  12   8   10.21    1.11
   1  12  -8   10.56    1.14
   1 -12  -8   10.03    1.18
   1 -12  -8   10.26    1.24
   1 -12  -8   10.94    1.06
  -1 -12   8    8.57    1.13
   1 -12  -8   10.55    1.22
  -1 -12   8    9.47    1.19
  -1 -12   8    7.48    0.99
  -1 -12   8   11.42    1.23
  -1  12   6    4.28    0.74
  -1  12   6    4.87    0.71
  -1  12   6    4.28    0.76
   1  12  -6    4.65    0.55
  -1  12   6    5.36    0.70
   1  12  -6    4.65    0.59
   1  12  -6    4.11    0.73
   1 -12  -6    4.17    0.73
  -1 -12   6    4.93    0.71
  -1 -12   6    5.11    0.57
  -1 -12   6    4.27    0.70
   1 -12  -6    3.89    0.56
   1 -12  -6    3.60    0.65
   1 -12  -6    5.71    0.75
  -1 -12   6    3.68    0.56
   1 -12  -6    3.79    0.66
   1  12  -4   24.54    2.00
  -1  12   4   26.52    2.07
   1  12  -4   23.54    1.97
  -1  12   4   22.21    2.19
   1  12  -4   25.26    2.01
  -1  12   4   22.81    2.03
   1  12  -4   23.56    1.94
   1  12  -4   22.18    2.05
   1  12  -4   22.18    1.94
   1 -12  -4   24.47    2.02
  -1 -12   4   23.80    1.98
  -1 -12   4   22.43    2.03
  -1 -12   4   25.55    2.10
  -1 -12   4   25.38    2.10
   1 -12  -4   24.39    2.07
   1 -12  -4   22.13    2.08
   1 -12  -4   22.59    2.01
  -1 -12   4   21.13    1.96
   1 -12  -4   24.08    2.08
  -1 -12   4   22.13    1.99
   1  12  -2   26.28    2.32
   1  12  -2   26.59    2.33
  -1  12   2   26.97    2.37
   1  12  -2   27.98    2.32
   1  12  -2   27.79    2.35
   1  12  -2   27.47    2.29
  -1  12   2   27.00    2.33
  -1  12   2   30.89    2.35
  -1  12   2   27.24    2.34
  -1  12   2   29.03    2.38
   1 -12  -2   28.15    2.35
  -1 -12   2   26.49    2.31
   1 -12  -2   29.64    2.41
  -1 -12   2   27.57    2.33
  -1 -12   2   26.27    2.32
  -1 -12   2   27.51    2.39
  -1 -12   2   26.58    2.41
   1 -12  -2   28.80    2.39
   1 -12  -2   25.88    2.34
  -1  12   0   34.24    2.58
   1  12   0   30.15    2.56
  -1  12   0   26.97    2.56
  -1  12   0   30.26    2.57
   1  12   0   31.78    2.59
  -1  12   0   29.96    2.59
  -1  12   0   26.47    2.53
   1  12   0   30.95    2.59
   1  12   0   34.21    2.59
   1  12   0   32.43    2.58
   1 -12   0   29.44    2.55
  -1 -12   0   31.91    2.65
  -1 -12   0   31.94    2.62
   1 -12   0   32.00    2.63
  -1 -12   0   28.73    2.57
  -1 -12   0   29.59    2.56
   1 -12   0   27.01    2.61
   1 -12   0   34.31    2.57
   1  12   2   26.32    2.33
  -1  12  -2   29.05    2.32
   1  12   2   26.84    2.35
  -1  12  -2   28.76    2.30
   1  12   2   25.11    2.36
  -1  12  -2   28.04    2.25
  -1  12  -2   29.40    2.30
  -1  12  -2   23.23    2.28
   1  12   2   28.49    2.33
   1  12   2   26.97    2.31
   1  12   2   25.20    2.28
   1 -12   2   25.16    2.36
   1 -12   2   28.84    2.27
   1 -12   2   27.10    2.28
  -1 -12  -2   26.05    2.33
   1 -12   2   28.06    2.29
   1 -12   2   30.11    2.36
  -1 -12  -2   25.96    2.33
  -1 -12  -2   27.14    2.34
  -1 -12  -2   28.49    2.37
  -1 -12  -2   27.75    2.39
   1  12   4   20.20    2.35
   1  12   4   23.68    2.04
   1  12   4   23.11    2.07
  -1  12  -4   26.27    2.03
  -1  12  -4   24.99    2.00
  -1  12  -4   25.46    2.06
   1  12   4   20.96    2.15
   1  12   4   23.62    2.08
   1 -12   4   22.18    2.00
  -1 -12  -4   22.52    2.10
  -1 -12  -4   23.04    2.11
  -1 -12  -4   22.26    2.05
   1 -12   4   25.59    2.10
   1 -12   4   24.69    2.04
   1 -12   4   24.62    2.01
  -1 -12  -4   22.61    2.18
   1 -12   4   23.93    1.99
  -1 -12  -4   21.88    2.19
   1 -12   4   28.49    2.14
  -1  12  -6    4.45    0.55
   1  12   6    4.30    0.71
   1  12   6    5.74    0.78
   1  12   6    4.66    0.68
  -1  12  -6    5.38    0.64
  -1  12  -6    3.81    0.55
  -1 -12  -6    4.64    0.97
  -1 -12  -6    4.24    0.69
   1 -12   6    5.92    0.73
  -1 -12  -6    3.93    0.56
   1 -12   6    4.50    0.63
   1 -12   6    4.31    0.69
  -1 -12  -6    3.63    0.66
  -1 -12  -6    3.58    0.66
   1  12   8    9.73    1.03
  -1  12  -8   10.68    1.26
  -1  12  -8    9.37    1.01
   1  12   8    9.96    1.15
   1  12   8   10.86    1.20
   1  12   8    9.85    1.15
   1 -12   8    9.28    1.16
  -1 -12  -8    9.74    1.04
   1 -12   8   10.36    1.18
  -1 -12  -8    8.96    1.13
  -1 -12  -8   10.46    1.21
  -1 -12  -8    8.89    1.19
   1 -12   8    9.32    1.09
   1  12  10    0.72    0.47
   1  12  10    0.80    0.49
   1  12  10    0.99    0.46
  -1  12 -10    0.99    0.46
  -1  12 -10    0.51    0.35
   1  12  10    1.04    0.60
   1  12  10    0.82    0.63
  -1 -12 -10    1.02    0.38
   1 -12  10    1.32    0.47
   1 -12  10    1.42    0.99
  -1 -12 -10    0.99    0.55
  -1 -12 -10    0.52    0.50
  -1 -12 -10   -0.38    0.51
   1  12  12    3.42    0.83
   1  12  12    3.68    0.90
  -1  12 -12    5.61    0.70
   1  12  12    4.57    0.91
   1  12  12    3.37    0.78
  -1 -12 -12    4.71    0.84
   1 -12  12    3.83    0.73
  -1 -12 -12    3.28    0.58
   1 -12  12    6.02    0.74
  -1 -12 -12    3.29    0.75
  -1 -12 -12    4.99    0.90
  -1 -12 -12    4.72    0.66
   1  12  14    5.16    1.09
   1  12  14    5.70    0.88
   1  12  14    6.47    1.02
  -1  12 -14    5.16    0.75
  -1 -12 -14    5.03    0.71
  -1 -12 -14    6.62    1.04
  -1 -12 -14    4.11    0.69
   1 -12  14    4.90    0.86
   1 -12  14    4.68    0.79
  -1 -12 -14    4.38    1.00
   1  13 -15   -0.88    0.51
  -1  13  15   -0.67    0.60
  -1  13  15    0.78    0.56
  -1  13  15   -0.45    0.50
   1  13 -15   -0.24    0.43
   1 -13 -15    0.33    0.64
   1 -13 -15   -0.52    0.39
   1 -13 -15    0.26    0.49
  -1 -13  15    0.59    0.54
  -1 -13  15   -0.46    0.61
  -1  13  13    0.69    0.68
   1  13 -13    0.54    0.43
  -1  13  13    1.11    0.58
   1  13 -13    0.25    0.55
  -1  13  13    1.08    0.51
  -1 -13  13    1.30    0.54
   1 -13 -13    0.86    0.45
   1 -13 -13    1.10    0.45
   1 -13 -13    1.17    0.67
   1 -13 -13    2.30    0.76
  -1 -13  13    1.65    0.68
  -1  13  11    8.65    1.00
  -1  13  11    8.20    1.12
  -1  13  11    8.60    1.19
   1  13 -11    9.23    1.06
  -1  13  11    8.36    1.11
  -1  13  11    7.64    1.10
   1  13 -11   13.80    1.23
  -1 -13  11   12.45    1.19
   1 -13 -11    7.54    1.15
   1 -13 -11    8.55    1.02
  -1 -13  11   12.19    1.30
   1 -13 -11    6.82    1.13
  -1  13   9   -0.08    0.41
   1  13  -9    0.85    0.39
   1  13  -9    1.41    0.52
  -1  13   9    0.94    0.52
  -1  13   9    0.79    0.62
  -1  13   9    1.10    0.45
  -1  13   9    1.32    0.62
  -1 -13   9    1.65    0.58
  -1 -13   9    1.67    0.51
  -1 -13   9    1.54    0.55
   1 -13  -9    1.44    0.59
   1 -13  -9    2.15    0.61
   1 -13  -9    1.19    0.40
  -1 -13   9    0.67    0.37
   1 -13  -9    2.03    0.63
   1  13  -7    1.41    0.49
  -1  13   7    0.51    0.44
   1  13  -7    1.34    0.41
  -1  13   7    0.89    0.54
  -1  13   7    0.94    0.55
  -1  13   7    0.96    0.43
   1 -13  -7    0.63    0.45
   1 -13  -7    0.16    0.34
  -1 -13   7    1.09    0.56
   1 -13  -7    1.37    0.56
   1 -13  -7    1.35    0.50
  -1 -13   7    0.34    0.50
  -1 -13   7    0.18    0.32
  -1 -13   7    0.86    0.54
   1 -13  -7    0.91    0.48
  -1 -13   7    0.52    0.33
  -1  13   5    0.95    0.42
  -1  13   5    1.04    0.43
  -1  13   5    1.42    0.53
  -1  13   5    0.97    0.47
   1  13  -5    1.40    0.39
   1  13  -5    1.56    0.39
   1  13  -5    1.10    0.45
   1 -13  -5    1.65    0.53
   1 -13  -5    0.72    0.47
  -1 -13   5    1.19    0.78
  -1 -13   5    0.31    0.34
  -1 -13   5    1.25    0.34
   1 -13  -5    0.96    0.46
   1 -13  -5    1.18    0.43
  -1 -13   5    2.31    0.47
   1 -13  -5    1.47    0.37
  -1  13   3    0.24    0.38
  -1  13   3    1.04    0.36
  -1  13   3    0.74    0.42
   1  13  -3    1.45    0.29
   1  13  -3    1.12    0.37
   1  13  -3    1.03    0.35
   1  13  -3    0.97    0.27
   1  13  -3    1.37    0.37
  -1  13   3    1.88    0.84
  -1 -13   3    1.31    0.41
  -1 -13   3    0.98    0.33
   1 -13  -3    0.56    0.41
   1 -13  -3    0.79    0.38
   1 -13  -3    1.05    0.39
  -1 -13   3    0.55    0.42
  -1 -13   3    1.09    0.49
  -1 -13   3    1.02    0.34
   1 -13  -3    0.88    0.79
  -1  13   1    3.32    0.52
   1  13  -1    3.09    0.51
  -1  13   1    2.51    0.45
  -1  13   1    1.67    0.39
   1  13  -1    3.41    0.50
   1  13  -1    2.63    0.42
   1  13  -1    2.60    0.46
   1  13  -1    2.88    0.50
  -1  13   1    2.47    0.51
  -1  13   1    2.63    0.47
  -1  13   1    2.80    0.48
  -1 -13   1    3.59    0.49
  -1 -13   1    3.03    0.48
  -1 -13   1    1.90    0.52
   1 -13  -1    2.41    0.46
   1 -13  -1    2.93    0.48
   1 -13  -1    2.79    0.53
  -1 -13   1    3.07    0.53
  -1 -13   1    3.75    0.59
   1 -13  -1    2.13    0.52
  -1  13  -1    2.96    0.51
   1  13   1    2.28    0.37
   1  13   1    2.67    0.47
   1  13   1    3.58    0.49
  -1  13  -1    2.29    0.47
   1  13   1    3.21    0.52
  -1  13  -1    2.30    0.40
  -1  13  -1    3.22    0.47
   1  13   1    3.23    0.52
   1  13   1    2.83    0.47
  -1 -13  -1    1.82    0.44
  -1 -13  -1    1.61    0.44
   1 -13   1    2.78    0.54
  -1 -13  -1    2.74    0.55
  -1 -13  -1    1.83    0.47
   1 -13   1    3.11    0.55
  -1 -13  -1    2.79    0.56
   1 -13   1    2.37    0.45
   1 -13   1    3.33    0.50
   1 -13   1    2.45    0.43
   1  13   3    0.39    0.39
  -1  13  -3    0.49    0.32
  -1  13  -3    0.72    0.24
   1  13   3    0.44    0.32
  -1  13  -3    0.67    0.32
  -1  13  -3    0.69    0.38
   1  13   3    0.09    0.34
  -1 -13  -3    0.98    0.62
   1 -13   3    0.53    0.28
   1 -13   3    1.10    0.43
   1 -13   3    0.94    0.30
   1 -13   3    0.83    0.44
   1 -13   3    0.83    0.39
  -1 -13  -3    0.37    0.41
   1  13   5    0.82    0.48
   1  13   5    0.99    0.38
  -1  13  -5    0.66    0.28
  -1  13  -5    0.63    0.33
   1  13   5    0.60    0.49
   1  13   5    1.06    0.41
  -1 -13  -5    0.69    0.43
  -1 -13  -5    0.52    0.45
   1 -13   5    0.26    0.29
  -1 -13  -5    0.74    0.49
   1 -13   5    0.40    0.42
  -1 -13  -5    0.97    0.43
   1 -13   5    0.59    0.42
  -1  13  -7    0.33    0.32
   1  13   7    0.59    0.44
   1  13   7    0.28    0.43
   1  13   7    0.34    0.54
  -1  13  -7    1.81    0.46
   1  13   7    0.21    0.53
   1 -13   7    0.41    0.48
  -1 -13  -7    0.26    0.46
  -1 -13  -7    0.62    0.53
  -1 -13  -7    1.35    0.55
  -1 -13  -7    1.11    0.50
   1 -13   7    0.83    0.82
   1 -13   7    0.67    0.44
  -1 -13  -7    0.52    0.35
   1  13   9    0.89    0.63
  -1  13  -9    2.18    0.67
   1  13   9    1.58    0.50
   1  13   9    1.44    0.67
   1  13   9    1.97    0.54
  -1  13  -9    1.24    0.50
   1 -13   9    2.16    0.51
  -1 -13  -9    0.93    0.39
  -1 -13  -9    1.86    0.64
   1 -13   9    0.98    0.56
  -1 -13  -9    1.34    0.58
  -1 -13  -9    0.75    0.57
   1 -13   9    1.28    0.55
   1  13  11    7.85    1.14
  -1  13 -11    8.46    0.97
   1  13  11    8.84    1.14
   1  13  11    8.89    1.21
   1  13  11    7.90    0.98
   1 -13  11   10.10    1.22
  -1 -13 -11    9.50    1.16
   1 -13  11    8.85    1.12
  -1 -13 -11    7.09    0.91
  -1 -13 -11    8.78    1.12
   1  13  13    1.38    0.55
  -1  13 -13    1.21    0.52
   1  13  13    0.43    0.58
   1  13  13    1.30    0.71
   1  13  13    0.66    0.47
  -1 -13 -13    1.47    0.69
  -1 -13 -13    0.87    0.41
   1 -13  13    1.78    0.64
   1 -13  13   -0.15    0.44
  -1 -13 -13    1.03    0.58
  -1 -13 -13    1.51    0.46
  -1  13 -15   -0.04    0.48
   1  13  15    0.91    0.67
   1  13  15   -0.13    0.51
   1  13  15   -0.07    0.57
   1 -13  15   -0.09    0.56
  -1 -13 -15    0.09    0.44
  -1 -13 -15   -0.25    0.42
  -1 -13 -15    1.75    0.72
   1 -13  15    0.24    0.51
  -1  14  14    0.25    0.66
   1  14 -14    1.45    0.48
   1  14 -14    1.77    0.62
  -1  14  14    1.02    0.59
  -1  14  14    1.65    0.71
   1 -14 -14    2.23    0.54
   1 -14 -14    1.21    0.76
  -1 -14  14    1.11    0.58
  -1 -14  14    1.40    0.68
   1 -14 -14    2.76    0.83
   1 -14 -14    1.55    0.56
  -1  14  12    2.78    0.65
  -1  14  12    2.27    0.72
   1  14 -12    1.60    0.62
  -1  14  12    3.59    0.79
   1  14 -12    2.04    0.53
  -1  14  12    2.54    0.80
  -1  14  12    2.42    0.56
   1 -14 -12    2.74    0.77
   1 -14 -12    2.77    0.54
   1 -14 -12    1.83    0.77
  -1 -14  12    2.95    0.66
   1 -14 -12    3.55    0.62
   1 -14 -12    3.14    0.72
  -1 -14  12    2.47    0.70
   1  14 -10    6.15    0.91
  -1  14  10    6.30    0.84
  -1  14  10    9.37    1.03
   1  14 -10    4.83    0.78
  -1  14  10    7.14    1.05
  -1  14  10    6.75    0.97
  -1 -14  10    6.55    0.97
   1 -14 -10    7.20    0.85
   1 -14 -10    9.41    1.10
   1 -14 -10   10.09    1.14
   1 -14 -10    7.14    1.04
  -1 -14  10    7.08    0.93
  -1 -14  10    5.05    0.93
   1  14  -8    2.26    0.62
  -1  14   8    2.05    0.65
  -1  14   8    2.57    0.67
  -1  14   8    3.18    0.58
  -1  14   8    1.74    0.59
   1  14  -8    1.31    0.47
  -1 -14   8    1.83    0.63
   1 -14  -8    3.11    0.65
  -1 -14   8    3.53    0.60
  -1 -14   8    2.61    0.65
   1 -14  -8    2.02    0.47
   1 -14  -8    1.50    0.56
   1 -14  -8    2.84    0.72
   1 -14  -8    2.94    0.67
  -1 -14   8    1.86    0.42
   1  14  -6    2.65    0.58
  -1  14   6    4.13    0.70
   1  14  -6    2.15    0.47
  -1  14   6    3.71    0.59
   1  14  -6    2.32    0.50
  -1  14   6    3.19    0.61
  -1  14   6    3.96    0.69
  -1 -14   6    1.60    0.44
  -1 -14   6    2.73    0.45
   1 -14  -6    3.67    0.67
  -1 -14   6    3.50    0.71
   1 -14  -6    2.48    0.60
  -1 -14   6    2.87    0.67
   1 -14  -6    3.23    0.52
   1 -14  -6    2.01    0.66
   1 -14  -6    3.38    0.62
   1  14  -4    2.44    0.46
   1  14  -4    1.30    0.36
  -1  14   4    3.29    0.57
  -1  14   4    4.72    0.64
   1  14  -4    2.11    0.39
   1  14  -4    2.65    0.49
  -1  14   4    3.95    0.57
   1  14  -4    3.14    0.50
  -1  14   4    3.55    0.63
   1  14  -4    3.41    0.55
   1 -14  -4    4.85    0.64
  -1 -14   4    2.58    0.47
  -1 -14   4    2.95    0.56
   1 -14  -4    4.10    0.66
   1 -14  -4    4.04    0.52
  -1 -14   4    3.99    0.67
  -1 -14   4    2.28    0.59
   1 -14  -4    4.58    0.66
   1  14  -2    7.56    0.87
  -1  14   2    7.10    0.87
   1  14  -2    6.89    0.83
   1  14  -2    6.78    0.79
   1  14  -2    6.99    0.88
  -1  14   2    8.63    0.93
  -1  14   2    6.97    0.84
  -1  14   2    8.04    0.90
  -1  14   2    7.42    0.83
  -1 -14   2    7.07    0.83
  -1 -14   2    8.73    0.97
   1 -14  -2    6.81    0.92
   1 -14  -2    8.78    0.98
  -1 -14   2    7.10    0.85
  -1 -14   2    7.67    0.86
   1 -14  -2    7.42    0.94
   1 -14  -2    7.41    0.91
  -1 -14   2    6.81    0.95
   1  14   0   22.62    1.94
  -1  14   0   21.55    1.95
   1  14   0   20.51    1.95
  -1  14   0   22.10    1.95
  -1  14   0   24.21    1.96
   1  14   0   23.41    1.99
  -1  14   0   24.83    1.93
  -1  14   0   22.53    1.97
   1  14   0   21.32    1.98
   1  14   0   19.37    1.97
   1 -14   0   24.02    1.95
  -1 -14   0   20.48    1.94
   1 -14   0   22.49    2.03
  -1 -14   0   23.24    2.03
  -1 -14   0   18.80    1.98
   1 -14   0   24.26    2.03
  -1 -14   0   21.94    1.95
  -1 -14   0   21.95    2.05
   1 -14   0   22.88    1.95
  -1  14  -2    7.29    0.81
   1  14   2    7.02    0.83
   1  14   2    6.88    0.86
   1  14   2    6.90    0.85
   1  14   2    7.13    0.84
   1  14   2    8.11    0.96
  -1  14  -2    7.53    0.88
  -1  14  -2    7.12    0.75
  -1 -14  -2    6.74    0.92
  -1 -14  -2    6.67    0.89
   1 -14   2    6.43    0.90
   1 -14   2    7.29    0.81
   1 -14   2    7.36    0.80
   1 -14   2    6.94    0.83
  -1 -14  -2    6.28    0.83
   1 -14   2    8.91    1.02
  -1  14  -4    2.83    0.48
  -1  14  -4    4.27    0.54
   1  14   4    4.14    0.66
   1  14   4    3.22    0.63
  -1  14  -4    4.14    0.58
   1  14   4    2.48    0.54
   1  14   4    3.50    0.55
   1  14   4    3.06    0.56
   1 -14   4    4.71    0.69
  -1 -14  -4    3.05    0.62
  -1 -14  -4    2.60    0.58
   1 -14   4    6.03    0.63
  -1 -14  -4    3.45    0.58
   1 -14   4    3.61    0.67
   1 -14   4    2.84    0.49
   1 -14   4    3.72    0.48
  -1 -14  -4    2.29    0.60
  -1  14  -6    3.95    0.58
   1  14   6    2.75    0.58
  -1  14  -6    2.53    0.46
   1  14   6    3.03    0.68
   1  14   6    1.13    0.61
   1  14   6    2.13    0.54
  -1 -14  -6    2.57    0.62
   1 -14   6    3.67    0.68
  -1 -14  -6    2.28    0.47
  -1 -14  -6    2.30    0.65
  -1 -14  -6    2.78    0.68
  -1 -14  -6    4.29    0.94
   1 -14   6    3.96    0.68
   1 -14   6    4.33    0.60
  -1  14  -8    2.21    0.55
   1  14   8    3.25    0.73
   1  14   8    2.22    0.60
  -1  14  -8    2.24    0.46
   1  14   8    2.40    0.56
   1  14   8    1.29    0.68
  -1 -14  -8    2.44    0.48
   1 -14   8    2.17    0.62
  -1 -14  -8    3.01    0.68
   1 -14   8    2.33    0.61
   1 -14   8    2.19    0.62
  -1 -14  -8    1.71    0.59
  -1 -14  -8    2.46    0.67
  -1 -14  -8    1.83    0.70
   1  14  10    5.46    0.83
   1  14  10    5.36    0.94
  -1  14 -10    6.02    0.73
  -1  14 -10    7.04    0.83
   1  14  10    6.44    0.99
   1  14  10    4.51    0.90
  -1 -14 -10    5.36    1.17
  -1 -14 -10    6.02    0.94
   1 -14  10   10.54    1.10
  -1 -14 -10    5.12    0.91
   1 -14  10    9.53    1.03
   1 -14  10    6.03    0.89
  -1 -14 -10    5.50    0.76
   1  14  12    3.84    0.87
   1  14  12    4.38    0.98
   1  14  12    2.96    0.74
  -1  14 -12    3.19    0.64
   1  14  12    3.48    0.64
  -1  14 -12    2.50    0.52
   1  14  12    2.55    0.69
  -1 -14 -12    3.41    0.81
   1 -14  12    3.35    0.63
  -1 -14 -12    2.83    0.55
  -1 -14 -12    3.01    0.72
  -1 -14 -12    2.04    0.75
   1  14  14    1.34    0.68
   1  14  14    1.37    0.77
   1  14  14    1.63    0.75
   1  14  14    1.08    0.57
  -1  14 -14    0.95    0.52
  -1 -14 -14    1.39    0.51
   1 -14  14    1.99    0.60
  -1 -14 -14    1.37    0.74
  -1 -14 -14    1.01    0.48
   1 -14  14    1.89    0.66
  -1 -14 -14    2.46    0.84
  -1  15  13   -0.38    0.47
   1  15 -13    0.23    0.53
   1  15 -13   -0.64    0.41
  -1  15  13    0.35    0.44
  -1  15  13    0.28    0.49
  -1  15  13    0.52    0.66
   1 -15 -13    0.14    0.66
   1 -15 -13    0.27    0.41
   1 -15 -13    0.32    0.44
  -1 -15  13    0.73    0.65
   1 -15 -13    0.43    0.59
   1 -15 -13    0.92    0.69
  -1 -15  13    0.44    0.57
  -1  15  11    1.76    0.64
  -1  15  11    1.84    0.57
  -1  15  11    2.52    0.78
   1  15 -11    1.19    0.47
  -1  15  11    1.95    0.68
   1  15 -11    1.89    0.59
  -1  15  11    0.77    0.47
  -1 -15  11    1.57    0.67
   1 -15 -11    0.78    0.56
  -1 -15  11    1.62    0.57
   1 -15 -11    1.70    0.69
  -1 -15  11    0.32    0.58
   1 -15 -11    0.85    0.59
   1 -15 -11    1.20    0.44
  -1  15   9    0.75    0.61
  -1  15   9    0.10    0.43
   1  15  -9    0.37    0.51
  -1  15   9    0.37    0.57
   1  15  -9    0.56    0.39
   1 -15  -9    0.48    0.49
  -1 -15   9    1.60    0.64
   1 -15  -9    1.20    0.44
  -1 -15   9    0.30    0.47
  -1 -15   9    0.34    0.56
   1 -15  -9    0.82    0.59
   1 -15  -9   -0.03    0.53
  -1  15   7    0.91    0.48
  -1  15   7    0.24    0.57
  -1  15   7    1.14    0.48
  -1  15   7    0.98    0.56
   1  15  -7    0.94    0.51
   1  15  -7    1.09    0.40
   1 -15  -7    0.81    0.58
   1 -15  -7    0.71    0.50
   1 -15  -7    1.17    0.51
  -1 -15   7    0.45    0.33
   1 -15  -7    1.47    0.41
  -1 -15   7    1.08    0.50
  -1 -15   7    0.58    0.55
  -1 -15   7    0.64    0.35
  -1 -15   7    1.09    0.60
   1 -15  -7    0.52    0.50
  -1  15   5    5.12    0.79
   1  15  -5    5.51    0.79
   1  15  -5    5.97    0.69
   1  15  -5    5.43    0.67
   1  15  -5    3.74    0.57
  -1  15   5    6.07    0.77
  -1  15   5    5.76    0.84
  -1  15   5    4.45    0.70
   1 -15  -5    4.40    0.77
  -1 -15   5    4.47    0.63
   1 -15  -5    5.40    0.66
  -1 -15   5    4.87    0.82
   1 -15  -5    4.34    0.79
  -1 -15   5    5.12    0.74
  -1 -15   5    6.05    0.85
   1 -15  -5    5.50    0.85
  -1 -15   5    4.46    0.62
   1 -15  -5    4.35    0.69
   1  15  -3    5.86    0.72
   1  15  -3    4.31    0.63
   1  15  -3    6.03    0.69
   1  15  -3    5.08    0.63
  -1  15   3    5.01    0.69
   1  15  -3    4.58    0.57
  -1  15   3    3.79    0.71
  -1  15   3    4.18    0.64
  -1  15   3    4.21    0.66
  -1  15   3    3.87    0.70
  -1 -15   3    4.49    0.62
   1 -15  -3    3.38    0.65
   1 -15  -3    4.74    0.80
   1 -15  -3    2.86    0.69
  -1 -15   3    5.11    0.77
   1 -15  -3    4.05    0.66
  -1 -15   3    4.69    0.64
  -1 -15   3    4.04    0.79
  -1 -15   3    6.17    0.79
  -1  15   1    7.19    0.82
  -1  15   1    5.78    0.77
  -1  15   1    6.12    0.77
  -1  15   1    7.23    0.86
   1  15  -1    6.72    0.84
   1  15  -1    6.91    0.83
  -1  15   1    5.52    0.78
   1  15  -1    5.76    0.74
   1  15  -1    6.56    0.80
  -1 -15   1    6.90    0.83
   1 -15  -1    6.11    0.86
  -1 -15   1    7.80    1.06
  -1 -15   1    7.17    0.94
   1 -15  -1    6.20    0.91
  -1 -15   1    7.08    0.92
   1 -15  -1    5.30    0.79
   1 -15  -1    8.10    1.10
  -1 -15   1    6.97    0.81
  -1  15  -1    5.96    0.72
   1  15   1    4.83    0.75
  -1  15  -1    6.03    0.76
   1  15   1    7.43    0.87
   1  15   1    6.71    0.82
   1  15   1    4.62    0.67
   1  15   1    6.38    0.83
   1  15   1    7.28    0.83
  -1  15  -1    8.40    0.83
  -1  15  -1    7.60    0.83
  -1 -15  -1    5.18    0.76
   1 -15   1    6.41    0.91
  -1 -15  -1    7.63    0.89
   1 -15   1    6.81    0.78
   1 -15   1    7.86    0.83
   1 -15   1    7.55    0.90
   1 -15   1    6.88    0.78
  -1 -15  -1    5.32    0.78
  -1 -15  -1    5.92    0.88
  -1 -15  -1    6.10    0.87
   1  15   3    4.71    0.74
  -1  15  -3    3.93    0.58
   1  15   3    4.01    0.64
  -1  15  -3    4.25    0.50
  -1  15  -3    3.67    0.61
  -1  15  -3    4.26    0.58
   1  15   3    4.17    0.62
   1  15   3    3.26    0.63
   1  15   3    2.99    0.67
   1 -15   3    4.68    0.74
   1 -15   3    4.01    0.75
  -1 -15  -3    4.64    0.75
  -1 -15  -3    2.99    0.68
  -1 -15  -3    4.28    0.69
   1 -15   3    4.48    0.57
  -1 -15  -3    4.08    0.68
   1 -15   3    3.81    0.58
   1 -15   3    4.65    0.62
   1  15   5    5.17    0.75
   1  15   5    4.60    0.79
  -1  15  -5    3.32    0.55
   1  15   5    5.30    0.70
  -1  15  -5    5.12    0.64
  -1  15  -5    4.87    0.71
   1  15   5    5.38    0.74
   1  15   5    6.32    0.85
  -1 -15  -5    4.12    0.69
  -1 -15  -5    4.01    0.78
   1 -15   5    5.06    0.84
  -1 -15  -5    5.21    0.80
   1 -15   5    5.76    0.71
   1 -15   5    4.71    0.60
   1 -15   5    4.67    0.78
  -1 -15  -5    4.31    0.76
  -1 -15  -5    4.65    0.76
   1  15   7    1.49    0.52
   1  15   7    0.48    0.56
   1  15   7    0.94    0.59
   1  15   7    0.25    0.43
  -1  15  -7    0.45    0.41
  -1  15  -7    0.90    0.49
  -1 -15  -7    0.80    0.39
  -1 -15  -7    0.38    0.50
  -1 -15  -7    0.44    0.51
  -1 -15  -7    1.45    0.61
  -1 -15  -7    0.95    0.54
   1 -15   7    0.35    0.51
   1 -15   7    0.45    0.54
   1 -15   7    1.24    0.51
   1  15   9    1.12    0.65
   1  15   9   -0.59    0.55
  -1  15  -9    0.27    0.37
  -1  15  -9    0.87    0.49
   1  15   9   -0.08    0.47
  -1 -15  -9    0.32    0.51
  -1 -15  -9    1.32    0.44
   1 -15   9    0.16    0.55
  -1 -15  -9    0.07    0.53
   1 -15   9   -0.31    0.49
   1 -15   9   -0.40    0.43
  -1 -15  -9    0.70    0.55
   1  15  11    1.04    0.61
  -1  15 -11    1.30    0.54
   1  15  11    1.71    0.56
   1  15  11    0.88    0.56
  -1  15 -11    1.42    0.45
   1  15  11    1.45    0.69
  -1 -15 -11    1.41    0.68
  -1 -15 -11    3.12    0.77
   1 -15  11    2.01    0.53
   1 -15  11    1.00    0.61
  -1 -15 -11    1.65    0.64
   1 -15  11    0.87    0.57
  -1 -15 -11    0.91    0.44
   1  15  13    0.86    0.71
  -1  15 -13    1.08    0.54
   1  15  13    0.02    0.46
   1  15  13    0.29    0.49
  -1  15 -13    0.27    0.41
   1  15  13    0.49    0.58
   1 -15  13    0.51    0.52
  -1 -15 -13    0.55    0.44
  -1 -15 -13    0.58    0.48
  -1 -15 -13   -0.17    0.60
  -1 -15 -13    0.28    0.64
   1 -15  13    0.63    0.61
   1  16 -14    0.42    0.59
  -1  16  14    1.36    0.76
   1  16 -14    0.53    0.55
  -1  16  14    0.34    0.67
   1 -16 -14    1.05    0.64
   1 -16 -14    0.71    0.79
  -1 -16  14    0.64    0.70
  -1 -16  14    0.73    0.59
   1 -16 -14    0.09    0.48
   1 -16 -14   -0.35    0.67
  -1  16  12    0.81    0.50
   1  16 -12   -0.30    0.39
   1  16 -12    1.07    0.58
  -1  16  12    0.57    0.59
  -1  16  12    0.78    0.53
  -1  16  12    0.41    0.70
   1 -16 -12    0.42    0.43
  -1 -16  12    0.36    0.64
   1 -16 -12    1.31    0.67
  -1 -16  12    0.59    0.67
   1 -16 -12    0.13    0.43
   1 -16 -12    0.76    0.67
   1 -16 -12    0.79    0.63
   1  16 -10    0.12    0.53
  -1  16  10    0.68    0.51
   1  16 -10    0.48    0.42
  -1  16  10    0.83    0.66
  -1  16  10    0.90    0.64
  -1  16  10    1.24    0.50
  -1  16  10    1.69    0.61
  -1 -16  10    0.68    0.62
   1 -16 -10    1.20    0.46
  -1 -16  10    1.52    0.67
  -1 -16  10    0.33    0.48
   1 -16 -10    1.63    0.64
   1 -16 -10    0.45    0.61
   1 -16 -10    0.80    0.62
  -1  16   8    1.84    0.69
   1  16  -8    1.77    0.48
  -1  16   8    2.56    0.71
  -1  16   8    1.01    0.52
  -1  16   8    2.27    0.63
   1  16  -8    2.69    0.63
  -1 -16   8    1.07    0.40
   1 -16  -8    1.45    0.46
  -1 -16   8    2.07    0.64
  -1 -16   8    1.70    0.57
  -1 -16   8    0.91    0.61
   1 -16  -8    1.46    0.65
   1 -16  -8    1.68    0.56
   1 -16  -8    1.56    0.59
  -1  16   6    5.37    0.78
  -1  16   6    6.10    0.88
   1  16  -6    4.73    0.77
   1  16  -6    4.81    0.71
  -1  16   6    6.74    0.92
  -1  16   6    5.64    0.85
   1  16  -6    5.96    0.72
   1 -16  -6    4.76    0.91
  -1 -16   6    4.17    0.87
   1 -16  -6    7.06    0.91
   1 -16  -6    6.69    0.81
  -1 -16   6    4.56    0.67
   1 -16  -6    5.03    0.85
  -1 -16   6    6.13    0.79
  -1 -16   6    5.80    0.90
   1 -16  -6    5.44    0.72
  -1 -16   6    4.74    0.67
  -1  16   4    0.68    0.54
   1  16  -4    0.27    0.37
   1  16  -4    0.67    0.30
  -1  16   4    2.24    0.52
  -1  16   4    2.03    0.52
   1  16  -4    0.40    0.41
  -1  16   4    0.10    0.39
   1  16  -4    1.21    0.48
  -1 -16   4    1.60    0.51
  -1 -16   4    0.97    0.40
   1 -16  -4    1.85    0.53
  -1 -16   4    1.81    0.61
   1 -16  -4    0.97    0.55
   1 -16  -4    1.49    0.58
  -1 -16   4    0.52    0.36
  -1 -16   4    1.16    0.54
   1  16  -2   14.49    1.56
   1  16  -2   17.67    1.57
   1  16  -2   16.06    1.51
   1  16  -2   15.88    1.56
  -1  16   2   18.48    1.57
  -1  16   2   16.56    1.56
  -1  16   2   17.95    1.59
  -1  16   2   16.55    1.63
   1  16  -2   15.76    1.59
  -1  16   2   15.88    1.59
  -1 -16   2   17.06    1.70
  -1 -16   2   16.51    1.54
   1 -16  -2   18.09    1.68
   1 -16  -2   16.67    1.59
   1 -16  -2   15.92    1.58
  -1 -16   2   16.78    1.62
  -1 -16   2   17.49    1.69
  -1 -16   2   15.59    1.53
   1 -16  -2   15.60    1.67
  -1  16   0   13.71    1.39
   1  16   0   12.49    1.39
   1  16   0   13.40    1.42
   1  16   0   12.33    1.40
   1  16   0   14.47    1.33
  -1  16   0   15.20    1.44
  -1  16   0   15.51    1.33
  -1  16   0   13.77    1.39
   1  16   0   13.55    1.39
   1 -16   0   16.16    1.50
  -1 -16   0   11.72    1.36
  -1 -16   0   14.22    1.50
  -1 -16   0   14.30    1.37
  -1 -16   0   12.27    1.44
  -1 -16   0   13.42    1.49
   1 -16   0   13.83    1.50
   1 -16   0   14.50    1.39
   1  16   2   15.74    1.59
  -1  16  -2   16.38    1.54
  -1  16  -2   14.43    1.45
   1  16   2   16.34    1.57
   1  16   2   14.75    1.56
  -1  16  -2   17.42    1.52
   1  16   2   14.65    1.53
  -1  16  -2   19.03    1.58
   1  16   2   16.89    1.62
  -1 -16  -2   17.34    1.59
   1 -16   2   16.74    1.64
  -1 -16  -2   16.67    1.56
   1 -16   2   17.80    1.68
   1 -16   2   15.02    1.48
  -1 -16  -2   15.19    1.65
  -1 -16  -2   16.21    1.64
  -1  16  -4    0.51    0.38
   1  16   4    0.96    0.54
   1  16   4    0.94    0.49
  -1  16  -4    1.04    0.41
   1  16   4    0.57    0.45
   1  16   4    0.79    0.52
   1  16   4    0.58    0.39
   1 -16   4    0.74    0.35
  -1 -16  -4    1.40    0.57
  -1 -16  -4    1.46    0.53
   1 -16   4    1.54    0.59
   1 -16   4    1.66    0.56
  -1 -16  -4    1.07    0.47
   1 -16   4    0.80    0.35
  -1 -16  -4    1.46    0.57
  -1  16  -6    5.33    0.66
  -1  16  -6    6.27    0.80
   1  16   6    5.18    0.76
   1  16   6    4.51    0.84
   1  16   6    5.09    0.79
   1  16   6    4.62    0.85
  -1 -16  -6    4.48    0.67
  -1 -16  -6    5.07    0.87
   1 -16   6    6.23    0.86
   1 -16   6    5.83    0.87
   1 -16   6    6.53    0.77
   1 -16   6    3.92    0.60
  -1 -16  -6    6.42    0.88
  -1 -16  -6    4.40    0.74
  -1 -16  -6    4.05    0.83
   1  16   8    1.10    0.69
  -1  16  -8    1.79    0.57
   1  16   8    1.69    0.71
   1  16   8    1.01    0.55
  -1  16  -8    1.27    0.42
   1  16   8    1.93    0.64
  -1 -16  -8    1.88    0.63
  -1 -16  -8    0.84    0.43
   1 -16   8    2.25    0.68
   1 -16   8    2.40    0.62
  -1 -16  -8    0.87    0.60
   1 -16   8    1.83    0.51
  -1 -16  -8    2.25    0.69
  -1  16 -10    0.75    0.52
   1  16  10    1.28    0.55
   1  16  10    1.55    0.60
   1  16  10    0.38    0.63
   1 -16  10    1.19    0.61
   1 -16  10    0.98    0.63
  -1 -16 -10    1.35    0.68
  -1 -16 -10    0.37    0.60
   1 -16  10    1.07    0.51
   1  16  12    0.63    0.87
   1  16  12   -0.35    0.45
   1  16  12    0.14    0.65
   1  16  12    0.74    0.50
  -1  16 -12    0.25    0.50
   1  16  12    0.26    0.54
   1 -16  12    0.03    0.49
  -1 -16 -12    0.51    0.62
  -1 -16 -12    1.14    0.67
  -1 -16 -12    0.88    0.64
   1 -16  12    0.05    0.56
   1  16  14   -0.15    0.70
  -1  16 -14    1.21    0.58
   1  16  14    1.12    0.54
   1  16  14    0.08    0.56
   1  16  14    0.43    0.70
   1  16  14    0.90    0.67
   1 -16  14    0.84    0.58
  -1 -16 -14    0.67    0.47
  -1 -16 -14    0.77    0.68
  -1 -16 -14    1.67    1.14
   1 -16  14    1.06    0.67
  -1 -16 -14    1.43    0.55
   1  17 -13    0.92    0.60
  -1  17  13    1.19    0.74
  -1  17  13    0.28    0.55
   1  17 -13    0.19    0.84
  -1  17  13    1.02    0.56
   1 -17 -13    0.52    0.46
   1 -17 -13   -0.06    0.62
   1 -17 -13    0.87    0.55
  -1 -17  13    1.89    0.75
  -1 -17  13    1.57    0.62
   1 -17 -13    0.92    0.71
  -1  17  11    0.04    0.65
  -1  17  11    1.20    0.53
  -1  17  11    0.41    0.57
   1  17 -11   -0.06    0.40
  -1  17  11    0.84    0.71
   1 -17 -11    0.15    0.40
  -1 -17  11    0.48    0.48
   1 -17 -11    0.46    0.57
   1 -17 -11    0.84    0.63
   1 -17 -11    0.08    0.61
  -1 -17  11    0.45    0.66
  -1 -17  11   -0.23    0.56
  -1  17   9    7.37    1.05
  -1  17   9    7.81    1.02
  -1  17   9    6.63    0.92
  -1  17   9    7.03    0.90
   1  17  -9    5.67    0.81
  -1  17   9    6.93    1.05
   1  17  -9    8.11    0.96
   1 -17  -9    6.57    0.83
   1 -17  -9    7.02    1.05
  -1 -17   9    6.38    0.97
  -1 -17   9    4.66    0.72
  -1 -17   9    7.03    1.02
   1 -17  -9    7.11    1.00
  -1 -17   9    6.09    0.89
   1 -17  -9    4.93    0.90
  -1  17   7    8.45    1.37
  -1  17   7    8.76    1.07
  -1  17   7    6.38    0.90
   1  17  -7    7.03    0.86
   1  17  -7    6.61    0.83
   1  17  -7    7.87    0.97
  -1  17   7    8.20    1.01
   1 -17  -7    7.34    0.87
   1 -17  -7    7.64    1.08
  -1 -17   7    6.60    1.03
  -1 -17   7    7.94    0.93
   1 -17  -7    6.61    0.99
   1 -17  -7    6.02    0.91
  -1 -17   7    7.57    1.05
   1 -17  -7   10.03    1.24
  -1 -17   7    5.79    0.80
   1  17  -5    1.09    0.43
  -1  17   5    2.89    0.59
  -1  17   5    2.75    0.59
  -1  17   5    2.04    0.61
  -1  17   5    3.04    0.69
   1  17  -5    2.03    0.52
   1  17  -5    1.73    0.61
  -1 -17   5    2.89    0.51
   1 -17  -5    2.87    0.65
   1 -17  -5    1.94    0.48
  -1 -17   5    2.96    0.58
  -1 -17   5    2.44    0.73
   1 -17  -5    2.00    0.69
   1 -17  -5    2.22    0.66
  -1 -17   5    1.73    0.65
  -1 -17   5    1.93    0.46
  -1  17   3    3.70    0.65
  -1  17   3    2.91    0.66
   1  17  -3    2.48    0.49
  -1  17   3    1.86    0.57
   1  17  -3    2.52    0.63
  -1  17   3    1.88    0.52
   1  17  -3    2.88    0.56
  -1  17   3    1.58    0.52
   1  17  -3    2.95    0.60
   1 -17  -3    3.07    0.71
  -1 -17   3    2.18    0.53
   1 -17  -3    3.71    0.66
  -1 -17   3    2.26    0.68
   1 -17  -3    2.30    0.57
  -1 -17   3    3.68    0.61
  -1 -17   3    2.53    0.70
   1 -17  -3    2.73    0.72
   1  17  -1   16.67    1.58
   1  17  -1   13.25    1.55
  -1  17   1   15.03    1.49
   1  17  -1   16.15    1.55
   1  17  -1   16.76    1.47
  -1  17   1   15.36    1.54
  -1  17   1   14.87    1.52
   1  17  -1   18.28    1.55
  -1  17   1   14.69    1.58
   1 -17  -1   13.22    1.60
  -1 -17   1   14.24    1.48
  -1 -17   1   17.51    1.68
  -1 -17   1   16.40    1.54
   1 -17  -1   18.33    1.55
   1 -17  -1   13.00    1.63
   1 -17  -1   15.04    1.52
  -1 -17   1   14.52    1.64
  -1 -17   1   16.31    1.58
   1  17   1   17.00    1.53
   1  17   1   17.44    1.59
  -1  17  -1   13.93    1.55
  -1  17  -1   15.50    1.57
  -1  17  -1   16.38    1.54
   1  17   1   20.44    1.63
  -1  17  -1   13.07    1.45
   1  17   1   16.98    1.64
   1  17   1   15.94    1.59
   1 -17   1   15.51    1.65
  -1 -17  -1   16.23    1.65
   1 -17   1   15.53    1.54
  -1 -17  -1   15.54    1.59
  -1 -17  -1   18.06    1.57
   1 -17   1   14.88    1.86
   1 -17   1   13.02    1.66
  -1 -17  -1   14.61    1.67
  -1  17  -3    3.01    0.64
   1  17   3    2.38    0.57
  -1  17  -3    2.51    0.55
  -1  17  -3    2.10    0.52
   1  17   3    3.08    0.62
   1  17   3    2.34    0.57
  -1  17  -3    2.06    0.42
   1  17   3    1.88    0.61
   1  17   3    2.62    0.66
  -1 -17  -3    2.63    0.60
   1 -17   3    3.36    0.55
   1 -17   3    4.11    0.77
   1 -17   3    3.26    0.57
  -1 -17  -3    1.93    0.57
   1 -17   3    2.37    0.72
   1 -17   3    2.50    0.49
  -1 -17  -3    3.79    0.75
  -1 -17  -3    3.54    0.71
   1  17   5    1.47    0.51
   1  17   5    1.58    0.66
   1  17   5    1.97    0.59
   1  17   5    1.47    0.61
   1  17   5    2.84    0.62
  -1  17  -5    1.77    0.48
  -1  17  -5    1.41    0.43
  -1  17  -5    2.96    0.64
  -1 -17  -5    1.49    0.66
  -1 -17  -5    2.19    0.62
   1 -17   5    2.29    0.54
   1 -17   5    1.87    0.62
   1 -17   5    2.24    0.65
  -1 -17  -5    1.04    0.62
   1 -17   5    1.59    0.41
  -1 -17  -5    2.55    0.61
   1  17   7    7.03    1.24
  -1  17  -7    8.93    0.90
   1  17   7    7.01    0.98
   1  17   7    8.20    0.96
  -1  17  -7    9.57    0.99
   1  17   7    7.42    1.01
   1 -17   7    7.70    1.01
  -1 -17  -7    6.73    1.02
  -1 -17  -7    5.91    0.81
   1 -17   7    6.53    0.86
  -1 -17  -7    6.38    0.95
   1 -17   7    5.50    0.98
  -1 -17  -7    6.98    1.04
   1 -17   7    5.47    0.75
  -1 -17  -7    7.81    1.32
   1  17   9    7.41    1.08
   1  17   9    6.10    1.07
   1  17   9    6.70    1.06
   1  17   9    8.53    1.00
  -1  17  -9    7.26    0.95
  -1 -17  -9    7.10    1.01
  -1 -17  -9    7.01    0.92
  -1 -17  -9    7.19    1.07
   1 -17   9    6.94    1.03
   1 -17   9    6.88    0.99
   1 -17   9    7.08    0.89
  -1 -17  -9    5.78    1.00
  -1 -17  -9    8.12    1.14
  -1  17 -11    1.31    0.53
   1  17  11    0.42    0.52
   1  17  11    1.21    0.61
   1  17  11    0.46    0.58
   1  17  11    0.43    0.67
   1  17  11   -0.25    0.64
  -1 -17 -11    1.10    0.67
  -1 -17 -11    0.19    0.56
   1 -17  11    0.00    0.56
   1 -17  11    0.12    0.53
  -1 -17 -11    0.29    0.41
   1 -17  11    0.83    0.62
  -1 -17 -11    1.72    0.70
   1  17  13    0.79    0.77
   1  17  13    1.17    0.73
  -1  17 -13    0.97    0.73
   1  17  13    1.58    0.62
   1  17  13    1.02    0.54
  -1 -17 -13    0.31    0.63
  -1 -17 -13    1.05    0.76
  -1 -17 -13    2.38    1.16
   1 -17  13    0.57    0.64
  -1 -17 -13    0.24    0.44
   1 -17  13    0.91    1.00
   1  18 -12   -0.42    0.55
   1  18 -12    0.50    0.49
  -1  18  12   -0.16    0.56
  -1  18  12    0.38    0.69
  -1  18  12    0.19    0.52
  -1  18  12   -0.64    0.46
   1 -18 -12   -0.12    0.58
   1 -18 -12    0.51    0.67
   1 -18 -12    0.48    0.45
  -1 -18  12    0.16    0.67
  -1 -18  12   -0.39    0.50
   1 -18 -12    0.04    0.63
  -1  18  10    3.74    0.84
   1  18 -10    2.38    0.56
   1  18 -10    2.45    0.67
  -1  18  10    2.87    0.64
  -1  18  10    3.38    0.87
  -1  18  10    3.07    0.76
  -1  18  10    3.71    0.72
   1 -18 -10    3.39    0.75
   1 -18 -10    2.96    0.74
  -1 -18  10    3.27    0.62
   1 -18 -10    1.70    0.75
  -1 -18  10    2.64    0.76
   1 -18 -10    2.67    0.59
  -1 -18  10    1.65    0.47
   1 -18 -10    3.20    0.77
   1  18  -8    0.35    0.40
   1  18  -8    1.26    0.58
  -1  18   8    1.59    0.58
  -1  18   8    1.72    0.69
  -1  18   8    1.59    0.66
  -1 -18   8    1.01    0.55
   1 -18  -8    1.07    0.64
   1 -18  -8    1.20    0.59
   1 -18  -8    1.16    0.47
  -1 -18   8    0.67    0.63
   1 -18  -8    2.25    0.60
  -1 -18   8    0.95    0.65
   1 -18  -8    1.10    0.64
  -1 -18   8    0.36    0.38
  -1  18   6   10.04    1.06
   1  18  -6   10.00    1.09
  -1  18   6    9.66    1.14
   1  18  -6    7.02    0.91
   1 -18  -6    9.57    1.19
   1 -18  -6    7.42    1.01
  -1 -18   6    7.11    0.91
  -1 -18   6    6.38    0.88
  -1 -18   6    9.38    1.18
  -1 -18   6    8.86    1.11
  -1 -18   6    7.12    1.12
   1 -18  -6    9.48    1.19
   1 -18  -6   10.53    1.09
   1 -18  -6    7.57    1.10
  -1  18   4    0.47    0.44
   1  18  -4    0.79    0.57
   1  18  -4    0.53    0.34
  -1  18   4    0.89    0.57
   1  18  -4    0.28    0.45
  -1  18   4    0.65    0.54
   1  18  -4    0.39    0.42
  -1  18   4    0.38    0.51
   1 -18  -4    1.13    0.54
   1 -18  -4    0.66    0.59
  -1 -18   4    0.61    0.61
   1 -18  -4    0.20    0.39
  -1 -18   4    0.52    0.39
  -1 -18   4    0.68    0.50
  -1 -18   4    1.12    0.62
   1 -18  -4    1.16    0.62
  -1 -18   4   -0.21    0.35
  -1  18   2    5.09    0.75
  -1  18   2    6.49    0.78
   1  18  -2    5.30    0.71
  -1  18   2    6.37    0.83
   1  18  -2    5.00    0.73
  -1  18   2    4.97    0.75
  -1  18   2    7.38    0.92
   1  18  -2    5.15    0.78
   1  18  -2    5.03    0.77
   1  18  -2    5.33    0.83
   1 -18  -2    6.42    0.82
   1 -18  -2    5.73    0.77
  -1 -18   2    5.30    0.77
  -1 -18   2    5.12    0.91
  -1 -18   2    4.49    0.87
  -1 -18   2    5.26    0.77
   1 -18  -2    4.83    0.89
   1 -18  -2    5.13    0.88
  -1 -18   2    3.97    0.73
  -1  18   0    1.31    0.50
  -1  18   0    2.35    0.49
  -1  18   0    1.81    0.58
   1  18   0    2.68    0.60
   1  18   0    2.31    0.50
   1  18   0    1.22    0.58
  -1  18   0    2.23    0.56
   1  18   0    2.03    0.59
   1  18   0    1.77    0.56
  -1 -18   0    2.62    0.59
   1 -18   0    2.66    0.57
   1 -18   0    2.71    0.57
  -1 -18   0    1.83    0.68
  -1 -18   0    1.98    0.57
   1 -18   0    0.91    0.63
  -1 -18   0    2.46    0.57
  -1 -18   0    0.79    0.60
   1 -18   0    1.80    0.66
  -1  18  -2    6.65    0.82
   1  18   2    5.36    0.76
  -1  18  -2    4.52    0.71
   1  18   2    5.34    0.77
  -1  18  -2    4.00    0.71
   1  18   2    4.02    0.78
  -1  18  -2    4.86    0.66
   1  18   2    5.17    0.84
   1  18   2    5.67    0.79
   1 -18   2    5.64    0.73
  -1 -18  -2    5.01    0.90
   1 -18   2    5.93    0.89
  -1 -18  -2    4.86    0.77
   1 -18   2    7.94    0.85
  -1 -18  -2    4.96    0.87
  -1 -18  -2    4.57    0.80
   1 -18   2    5.26    0.86
  -1  18  -4    0.47    0.31
   1  18   4    2.25    0.63
   1  18   4    1.16    0.52
   1  18   4    0.97    0.48
  -1  18  -4    0.68    0.45
   1  18   4    0.61    0.57
   1  18   4   -0.02    0.42
  -1  18  -4    0.00    0.47
  -1 -18  -4    0.83    0.53
   1 -18   4    0.58    0.38
  -1 -18  -4    0.74    0.49
  -1 -18  -4    0.34    0.55
   1 -18   4    0.65    0.37
  -1 -18  -4   -0.40    0.57
   1 -18   4    1.21    0.49
   1 -18   4    0.47    0.55
   1 -18   4    0.90    0.57
  -1  18  -6    8.93    0.92
   1  18   6    7.99    1.09
   1  18   6    9.12    1.07
  -1  18  -6    7.80    0.91
  -1  18  -6    9.38    1.05
  -1 -18  -6    7.79    1.14
   1 -18   6    9.03    1.18
   1 -18   6    8.78    0.96
  -1 -18  -6    5.41    0.96
  -1 -18  -6    6.86    1.12
   1 -18   6   10.62    1.19
   1 -18   6    8.35    1.05
  -1  18  -8    0.30    0.40
  -1  18  -8    0.54    0.55
   1  18   8    2.45    0.75
   1  18   8    1.16    0.57
  -1 -18  -8    0.89    0.61
   1 -18   8    0.65    0.64
  -1 -18  -8    1.37    0.59
  -1 -18  -8    1.12    0.46
   1 -18   8    0.61    0.64
   1  18  10    2.35    0.73
   1  18  10    3.12    0.88
   1  18  10    2.18    0.76
   1  18  10    2.86    0.64
  -1  18 -10    4.24    1.21
  -1 -18 -10    3.03    0.60
  -1 -18 -10    3.01    0.73
   1 -18  10    2.41    0.61
  -1 -18 -10    1.48    0.74
  -1 -18 -10    3.56    0.84
   1  18  12    0.23    0.74
   1  18  12    0.23    0.57
   1  18  12   -0.16    0.54
  -1  18 -12   -0.42    0.56
   1  18  12   -0.42    0.49
   1 -18  12   -0.51    0.70
  -1 -18 -12   -0.02    0.43
  -1 -18 -12    0.17    0.61
   1 -18  12    0.06    0.49
  -1 -18 -12    0.28    0.65
  -1 -18 -12    0.60    0.67
   1  19 -11    0.84    0.60
  -1  19  11    0.44    0.71
  -1  19  11    1.61    0.60
  -1  19  11   -0.05    0.53
  -1  19  11    0.53    0.58
   1 -19 -11   -0.01    0.67
  -1 -19  11    0.46    0.70
  -1 -19  11    0.26    0.69
  -1 -19  11    0.91    0.52
   1 -19 -11    1.13    0.69
   1 -19 -11    0.90    0.45
   1 -19 -11    1.04    0.67
   1  19  -9   -0.48    0.51
  -1  19   9   -0.28    0.64
  -1  19   9    0.32    0.55
  -1  19   9   -0.16    0.47
  -1  19   9    0.60    0.51
  -1 -19   9    0.10    0.34
   1 -19  -9    0.00    0.65
   1 -19  -9    0.21    0.56
   1 -19  -9    0.05    0.60
   1 -19  -9    0.35    0.54
  -1 -19   9    0.09    0.61
  -1 -19   9    0.13    0.46
   1 -19  -9    0.36    0.41
   1  19  -7   -0.12    0.63
  -1  19   7    0.98    0.66
  -1  19   7    0.92    0.54
  -1  19   7    1.92    0.66
  -1  19   7    0.73    0.54
   1  19  -7    1.15    0.47
   1 -19  -7    0.23    0.53
  -1 -19   7    0.68    0.51
   1 -19  -7    0.70    0.42
  -1 -19   7    0.18    0.35
   1 -19  -7    1.22    0.63
   1 -19  -7    0.22    0.49
   1 -19  -7    0.30    0.65
  -1 -19   7    0.66    0.47
  -1 -19   7    0.02    0.80
  -1  19   5    0.47    0.69
  -1  19   5    1.70    0.59
   1  19  -5    0.22    0.57
   1  19  -5   -0.16    0.43
   1  19  -5    0.99    0.48
   1  19  -5    0.92    0.36
  -1  19   5    0.86    0.62
  -1 -19   5    0.49    0.66
  -1 -19   5    0.16    0.38
   1 -19  -5    1.54    0.62
  -1 -19   5    1.41    0.67
  -1 -19   5    0.22    0.53
   1 -19  -5    0.48    0.60
  -1 -19   5    0.94    0.44
   1 -19  -5    0.54    0.44
  -1  19   3   11.48    1.31
   1  19  -3   12.60    1.32
   1  19  -3    9.86    1.28
   1  19  -3   14.44    1.40
  -1  19   3   10.17    1.22
  -1  19   3   11.26    1.35
   1  19  -3   11.15    1.17
  -1  19   3   10.77    1.37
  -1  19   3   13.32    1.31
  -1 -19   3   11.35    1.47
  -1 -19   3   13.16    1.31
   1 -19  -3   11.09    1.32
  -1 -19   3   12.65    1.24
  -1 -19   3   10.93    1.41
   1 -19  -3   11.96    1.48
   1 -19  -3    9.89    1.29
  -1 -19   3   11.06    1.24
   1 -19  -3   10.87    1.39
   1  19  -1    8.41    1.01
  -1  19   1    8.09    1.04
   1  19  -1    7.91    0.94
   1  19  -1    8.79    1.04
   1  19  -1    8.79    1.00
   1  19  -1    8.37    0.97
  -1  19   1    7.89    0.96
  -1  19   1    6.90    0.96
  -1  19   1    7.37    0.94
   1 -19  -1    5.47    1.04
  -1 -19   1    7.88    1.12
   1 -19  -1    6.80    0.95
  -1 -19   1    6.50    0.93
  -1 -19   1    7.44    0.97
  -1 -19   1    8.84    1.15
  -1 -19   1    7.90    1.00
   1 -19  -1    7.06    0.92
   1 -19  -1    8.56    1.10
   1  19   1    7.69    1.03
   1  19   1    8.81    1.02
  -1  19  -1    7.38    0.94
  -1  19  -1    6.88    0.95
   1  19   1    9.31    1.04
  -1  19  -1    7.75    0.98
   1  19   1    6.21    0.96
  -1  19  -1    7.23    0.89
   1  19   1    8.51    1.02
  -1 -19  -1    6.67    0.96
  -1 -19  -1    7.05    1.09
   1 -19   1    8.37    0.99
   1 -19   1    9.18    1.01
  -1 -19  -1    9.78    1.14
  -1 -19  -1    6.59    1.05
   1 -19   1    8.07    1.11
   1 -19   1    9.45    1.15
   1  19   3   13.90    1.33
  -1  19  -3   11.53    1.16
  -1  19  -3   13.49    1.27
   1  19   3   13.27    1.42
   1  19   3   11.43    1.35
   1  19   3   11.55    1.35
  -1  19  -3   12.89    1.27
  -1  19  -3   13.33    1.36
   1  19   3   11.64    1.30
  -1 -19  -3   10.52    1.39
   1 -19   3    9.43    1.18
  -1 -19  -3    9.21    1.24
   1 -19   3   11.89    1.45
  -1 -19  -3   10.59    1.39
   1 -19   3   11.31    1.38
   1 -19   3   11.21    1.29
  -1 -19  -3   13.31    1.38
   1 -19   3   11.47    1.21
   1  19   5    0.61    0.61
   1  19   5    1.46    0.55
   1  19   5    1.06    0.54
  -1  19  -5    1.08    0.58
  -1  19  -5    1.00    0.46
   1 -19   5    1.36    0.44
   1 -19   5    1.31    0.66
   1 -19   5    1.28    0.67
  -1 -19  -5    0.38    0.60
   1 -19   5    0.99    0.47
   1 -19   5    0.25    0.37
  -1 -19  -5    0.40    0.64
  -1  19  -7    0.56    0.86
  -1  19  -7    0.45    0.42
   1  19   7   -0.44    0.46
   1  19   7    1.12    0.64
   1  19   7    0.97    0.59
   1  19   7   -0.57    0.60
  -1 -19  -7    0.42    0.55
   1 -19   7    0.11    0.35
  -1 -19  -7    1.55    0.66
  -1 -19  -7    0.17    0.41
  -1 -19  -7    0.00    0.49
   1 -19   7    0.51    0.76
  -1 -19  -7   -0.13    0.58
   1 -19   7    0.01    0.56
  -1  19  -9    0.53    0.58
   1  19   9    0.24    0.66
   1  19   9    0.06    0.54
   1  19   9    0.44    0.56
  -1  19  -9    0.16    0.37
  -1 -19  -9    0.28    0.59
  -1 -19  -9    0.25    0.42
   1 -19   9    0.99    0.70
   1 -19   9    0.43    0.47
  -1 -19  -9    0.87    0.68
   1 -19   9    0.27    0.82
  -1 -19  -9   -0.32    0.54
   1  19  11    0.47    0.54
   1  19  11    1.47    0.71
   1  19  11    0.43    0.75
   1  19  11   -0.07    0.69
   1  19  11    0.47    0.56
  -1  19 -11    0.02    0.57
  -1 -19 -11    1.06    0.65
   1 -19  11    1.39    0.69
   1 -19  11    0.56    0.51
  -1 -19 -11    0.62    0.69
  -1 -19 -11    0.22    0.64
  -1 -19 -11    0.24    0.43
  -1  20  10    0.51    0.63
   1  20 -10    1.17    0.65
  -1  20  10    0.75    0.55
  -1  20  10    1.68    0.76
  -1  20  10    0.35    0.52
  -1 -20  10    0.51    0.50
   1 -20 -10   -0.41    0.66
   1 -20 -10    0.47    0.61
  -1 -20  10    0.68    0.71
   1 -20 -10    1.05    0.51
   1  20  -8   -0.32    0.38
   1  20  -8    0.41    0.60
  -1  20   8    1.23    0.67
  -1  20   8   -0.11    0.53
  -1  20   8   -0.22    0.49
   1 -20  -8    0.32    0.45
   1 -20  -8   -0.21    0.53
   1 -20  -8    0.17    0.58
  -1 -20   8    0.72    0.65
  -1 -20   8    0.24    0.37
  -1 -20   8    0.09    0.59
  -1 -20   8    0.27    0.48
   1 -20  -8   -0.44    0.60
  -1  20   6    0.70    0.55
   1  20  -6    1.57    0.50
  -1  20   6    1.40    0.65
  -1  20   6    0.60    0.65
   1  20  -6    0.90    0.60
   1  20  -6    0.68    0.45
   1 -20  -6    1.54    0.52
  -1 -20   6    1.07    0.68
  -1 -20   6    1.08    0.45
  -1 -20   6    0.25    0.64
   1 -20  -6    0.82    0.69
   1 -20  -6    0.56    0.59
  -1 -20   6    0.58    0.40
  -1 -20   6    0.87    0.49
   1  20  -4    5.56    0.71
  -1  20   4    6.07    0.98
  -1  20   4    5.45    0.85
   1  20  -4    8.67    1.05
   1  20  -4    4.52    0.73
  -1  20   4    5.40    0.85
   1  20  -4    6.32    0.85
   1 -20  -4    7.49    1.05
  -1 -20   4    5.09    0.95
   1 -20  -4    5.22    0.79
   1 -20  -4    4.40    1.19
  -1 -20   4    6.11    0.79
  -1 -20   4    7.60    0.86
  -1 -20   4    6.16    0.87
  -1  20   2    7.73    1.02
   1  20  -2    6.47    0.83
   1  20  -2    7.81    0.97
   1  20  -2    7.50    0.95
  -1  20   2    4.70    1.11
  -1  20   2    7.80    0.94
  -1 -20   2    8.41    1.03
  -1 -20   2    7.29    0.92
   1 -20  -2    6.20    1.41
   1 -20  -2    6.05    0.90
  -1 -20   2    6.52    1.54
   1 -20  -2    7.38    0.97
   1 -20  -2    6.86    1.29
  -1 -20   2    5.79    0.89
  -1  20   0   30.99    2.63
  -1  20   0   34.46    2.70
   1  20   0   25.78    2.63
   1  20   0   30.28    2.71
   1  20   0   35.13    3.07
  -1  20   0   32.61    3.15
  -1  20   0   28.93    2.69
   1  20   0   32.50    2.70
   1  20   0   29.03    2.63
   1 -20   0   29.97    2.66
  -1 -20   0   33.66    3.21
   1 -20   0   30.79    2.65
   1 -20   0   30.25    2.98
  -1 -20   0   28.82    2.65
  -1 -20   0   28.74    3.10
  -1 -20   0   26.13    2.66
   1 -20   0   32.66    3.18
   1  20   2    5.18    1.19
   1  20   2    5.97    1.00
  -1  20  -2    6.80    0.83
   1  20   2    5.08    1.23
  -1  20  -2    8.80    0.95
   1  20   2    6.07    0.91
   1  20   2    7.89    1.05
  -1  20  -2    7.44    0.93
   1 -20   2    8.62    0.96
  -1 -20  -2    6.18    0.95
  -1 -20  -2    5.03    0.92
   1 -20   2    9.06    1.15
  -1 -20  -2    6.67    1.22
   1 -20   2    9.17    1.00
   1  20   4    7.04    0.95
  -1  20  -4    6.58    0.84
   1  20   4    6.53    0.94
   1  20   4    4.41    0.92
  -1  20  -4    9.32    1.23
   1  20   4    9.25    1.12
  -1  20  -4    5.04    0.77
  -1  20  -4    6.74    0.78
  -1 -20  -4    7.24    1.13
   1 -20   4    6.02    0.81
   1 -20   4    7.17    1.13
   1 -20   4    6.36    0.81
  -1 -20  -4    5.70    0.92
   1 -20   4    6.93    1.08
   1 -20   4    6.27    0.85
  -1 -20  -4    6.56    1.09
   1  20   6    0.96    0.58
  -1  20  -6    0.55    0.44
   1  20   6    0.91    0.58
  -1  20  -6    1.56    0.58
  -1  20  -6    0.63    0.48
   1  20   6    0.37    0.60
   1  20   6    0.96    0.68
   1 -20   6    1.23    0.69
  -1 -20  -6    0.60    0.44
  -1 -20  -6    1.33    0.65
  -1 -20  -6    0.63    0.65
   1 -20   6    1.15    0.48
   1 -20   6    0.51    0.42
  -1 -20  -6    1.29    0.95
   1  20   8   -0.14    0.62
  -1  20  -8    0.85    0.58
   1  20   8   -0.25    0.62
   1  20   8   -0.29    0.52
   1  20   8   -0.57    0.48
  -1  20  -8    0.42    0.41
  -1 -20  -8   -0.19    0.58
   1 -20   8   -0.11    0.36
   1 -20   8    1.20    0.67
  -1 -20  -8    0.34    0.45
  -1 -20  -8    0.06    0.54
   1 -20   8    0.58    0.49
  -1 -20  -8   -0.87    0.61
   1 -20   8    0.18    0.63
  -1  20 -10   -0.46    0.53
   1  20  10    0.41    0.56
   1  20  10    0.40    0.67
   1  20  10   -0.31    0.68
   1  20  10   -0.30    0.51
  -1 -20 -10    0.27    0.59
   1 -20  10    0.33    0.47
   1 -20  10    0.39    0.64
  -1 -20 -10    0.40    0.69
   1 -20  10    0.15    0.65
  -1 -20 -10    1.57    0.73
  -1 -20 -10    0.81    0.44
   1  21  -9    0.83    0.66
  -1  21   9    0.51    0.56
  -1  21   9    0.09    0.56
   1  21  -9    0.70    0.46
  -1  21   9    0.69    0.71
  -1 -21   9    1.17    0.73
   1 -21  -9   -0.26    0.60
   1 -21  -9    0.62    0.59
   1 -21  -9    0.67    0.66
  -1 -21   9    1.68    0.59
   1 -21  -9    0.77    0.49
  -1 -21   9    0.92    0.72
  -1 -21   9    0.49    0.39
   1 -21  -9    1.68    0.77
  -1  21   7    2.18    0.65
  -1  21   7    2.36    0.68
   1  21  -7    2.51    0.58
  -1  21   7    2.10    0.75
   1  21  -7    3.43    0.78
   1 -21  -7    1.52    0.79
  -1 -21   7    1.53    0.49
   1 -21  -7    0.11    0.64
  -1 -21   7    0.67    0.46
   1 -21  -7    3.62    0.60
   1 -21  -7    2.50    0.72
  -1 -21   7    2.31    0.84
  -1 -21   7    0.56    0.74
   1  21  -5    0.65    0.36
  -1  21   5    0.97    0.55
  -1  21   5    0.27    0.62
   1  21  -5    1.57    0.66
  -1  21   5    1.25    0.58
   1  21  -5    0.72    0.47
  -1 -21   5    0.75    0.50
   1 -21  -5    0.68    0.66
  -1 -21   5    0.99    0.46
   1 -21  -5    1.35    0.62
  -1 -21   5    0.50    0.61
  -1 -21   5    0.98    0.71
   1 -21  -5    0.62    0.44
  -1 -21   5    0.68    0.47
   1 -21  -5    1.74    0.74
   1  21  -3    1.35    0.65
  -1  21   3    2.27    0.71
   1  21  -3    1.75    0.58
  -1  21   3    2.48    0.63
  -1  21   3    1.96    0.59
   1  21  -3    1.74    0.48
  -1  21   3    1.98    0.59
   1  21  -3    3.88    0.74
  -1 -21   3    1.99    0.61
   1 -21  -3    2.88    0.83
   1 -21  -3    1.90    0.75
  -1 -21   3    1.58    0.54
   1 -21  -3    1.37    0.72
  -1 -21   3    0.71    0.51
  -1 -21   3    1.84    0.75
  -1 -21   3    1.12    0.69
  -1  21   1    0.41    0.41
   1  21  -1   -0.19    0.51
   1  21  -1   -0.01    0.54
  -1  21   1    0.02    0.52
  -1  21   1    0.85    0.50
   1  21  -1    0.58    0.42
   1  21  -1   -0.02    0.52
  -1  21   1    0.52    0.51
  -1 -21   1    0.14    0.61
  -1 -21   1   -0.16    0.43
   1 -21  -1    0.09    0.46
  -1 -21   1    0.04    0.49
  -1 -21   1   -0.86    0.56
   1 -21  -1   -0.15    0.63
   1 -21  -1    0.21    0.49
   1  21   1    0.11    0.55
   1  21   1    0.84    0.52
  -1  21  -1    0.66    0.54
  -1  21  -1    0.57    0.40
   1  21   1    1.16    0.56
  -1  21  -1    0.31    0.49
  -1  21  -1    1.34    0.53
   1  21   1    0.33    0.43
   1 -21   1    0.10    0.59
  -1 -21  -1   -0.15    0.50
   1 -21   1    0.34    0.47
   1 -21   1   -0.34    0.58
   1 -21   1   -0.16    0.43
  -1 -21  -1    0.17    0.49
  -1 -21  -1   -0.07    0.62
  -1 -21  -1    0.34    0.64
   1  21   3    3.19    0.69
  -1  21  -3    2.33    0.58
  -1  21  -3    1.88    0.66
   1  21   3    2.49    0.70
   1  21   3    2.09    0.70
   1  21   3    4.32    0.69
   1  21   3    3.08    0.66
  -1  21  -3    1.05    0.49
  -1  21  -3    2.14    0.56
  -1 -21  -3    2.85    0.82
  -1 -21  -3    2.62    0.69
  -1 -21  -3    1.53    0.70
   1 -21   3    2.54    0.55
   1 -21   3    1.12    0.71
  -1 -21  -3    1.36    0.60
   1 -21   3    1.01    0.69
   1 -21   3    2.22    0.63
  -1  21  -5    0.95    0.62
   1  21   5    1.32    0.67
   1  21   5    1.85    0.69
   1  21   5   -0.13    0.55
  -1  21  -5    1.46    0.44
   1  21   5    0.74    0.53
   1  21   5   -0.48    0.49
   1 -21   5    0.05    0.62
  -1 -21  -5    0.47    0.66
   1 -21   5    0.70    0.65
   1 -21   5    0.54    0.40
   1 -21   5    0.71    0.41
  -1 -21  -5    0.43    0.64
  -1 -21  -5    0.56    0.59
   1  21   7    1.63    0.64
   1  21   7    0.41    0.60
  -1  21  -7    1.05    0.64
   1  21   7    1.39    0.75
   1  21   7    1.71    0.70
   1 -21   7    2.62    0.80
   1 -21   7    2.59    0.80
   1 -21   7    1.84    0.48
  -1 -21  -7    2.46    0.57
  -1 -21  -7    2.23    0.80
   1 -21   7    2.61    0.60
  -1 -21  -7    1.74    0.74
  -1  21  -9    1.01    0.64
   1  21   9    1.11    0.68
   1  21   9    0.38    0.66
   1  21   9    0.96    0.74
   1  21   9    0.39    0.59
  -1  21  -9    1.09    0.46
  -1 -21  -9    0.97    0.75
   1 -21   9    0.41    0.51
   1 -21   9    0.82    0.71
   1 -21   9    0.47    0.67
  -1 -21  -9    0.57    0.47
  -1 -21  -9    1.51    0.70
  -1 -21  -9    0.85    0.60
  -1 -21  -9    0.56    0.68
  -1 -22  10   -0.11    0.54
   1 -22 -10    0.11    0.61
  -1 -22  10    0.78    0.45
  -1  22   8    1.24    0.60
   1  22  -8    1.52    0.72
  -1  22   8    0.60    0.69
   1  22  -8    1.08    0.51
  -1  22   8    1.42    0.68
  -1 -22   8    0.86    0.73
  -1 -22   8    1.57    0.56
   1 -22  -8    1.09    0.51
  -1 -22   8    2.04    0.79
   1 -22  -8    1.94    0.78
   1 -22  -8    0.76    0.68
   1 -22  -8    1.03    0.77
  -1 -22   8    0.82    0.47
  -1  22   6    3.70    0.79
  -1  22   6    3.76    0.87
   1  22  -6    3.29    0.66
   1  22  -6    2.59    0.58
  -1  22   6    3.33    0.73
   1  22  -6    5.26    0.90
   1 -22  -6    3.80    0.68
  -1 -22   6    3.01    0.65
   1 -22  -6    4.55    0.96
   1 -22  -6    3.53    0.87
  -1 -22   6    4.52    0.69
  -1 -22   6    4.66    0.94
   1 -22  -6    4.95    0.89
  -1 -22   6    2.55    0.68
  -1 -22   6    3.49    0.95
   1  22  -4    1.25    0.52
   1  22  -4    1.59    0.46
  -1  22   4    1.70    0.60
  -1  22   4    0.67    0.55
  -1  22   4    2.04    0.71
   1  22  -4    1.46    0.58
   1  22  -4    0.59    0.63
   1 -22  -4    1.39    0.73
  -1 -22   4    2.30    0.75
   1 -22  -4    1.98    0.65
  -1 -22   4    1.86    0.53
   1 -22  -4    1.33    0.49
  -1 -22   4    1.00    0.75
   1 -22  -4    1.24    0.71
  -1 -22   4    1.83    0.57
   1  22  -2    3.52    0.72
  -1  22   2    3.54    0.71
   1  22  -2    2.29    0.65
  -1  22   2    2.81    0.75
  -1  22   2    3.15    0.67
   1  22  -2    3.07    0.61
   1  22  -2    4.52    0.82
  -1  22   2    3.47    0.69
   1 -22  -2    3.37    0.67
  -1 -22   2    2.76    0.84
  -1 -22   2    2.51    0.81
  -1 -22   2    3.19    0.86
   1 -22  -2    4.38    1.06
  -1 -22   2    1.99    0.60
   1 -22  -2    3.97    0.87
   1 -22  -2    3.00    0.85
   1  22   0    1.19    0.62
   1  22   0    2.10    0.55
   1  22   0    2.20    0.66
   1  22   0    1.25    0.65
  -1  22   0    1.04    0.49
  -1  22   0    1.57    0.61
  -1  22   0    1.70    0.68
  -1  22   0    0.98    0.55
  -1 -22   0    1.89    0.76
   1 -22   0    2.23    0.60
   1 -22   0    0.69    0.69
  -1 -22   0    1.77    0.61
   1 -22   0    1.61    0.57
  -1 -22   0    1.46    0.75
  -1 -22   0    1.32    0.57
   1 -22   0    1.53    0.70
  -1  22  -2    4.42    0.63
  -1  22  -2    4.31    0.74
   1  22   2    3.95    0.79
   1  22   2    3.34    0.73
   1  22   2    4.02    0.74
   1  22   2    3.58    0.82
  -1  22  -2    3.85    0.72
  -1  22  -2    3.65    0.74
   1  22   2    4.52    0.78
  -1 -22  -2    2.85    0.70
   1 -22   2    3.04    0.87
   1 -22   2    4.06    0.90
   1 -22   2    4.47    0.69
  -1 -22  -2    3.31    0.76
  -1 -22  -2    4.31    0.92
  -1 -22  -2    3.12    0.87
   1 -22   2    2.29    0.65
   1  22   4    1.32    0.63
  -1  22  -4    0.93    0.51
   1  22   4    2.41    0.66
  -1  22  -4    1.07    0.55
  -1  22  -4    2.40    0.65
   1  22   4    2.21    0.61
   1  22   4    2.23    0.76
   1  22   4    1.91    0.70
   1 -22   4    2.42    0.67
   1 -22   4    3.86    0.82
  -1 -22  -4    2.09    0.79
  -1 -22  -4    1.89    0.75
   1 -22   4    2.87    0.85
   1 -22   4    2.38    0.53
  -1 -22  -4    1.19    0.64
  -1 -22  -4    2.28    0.62
   1  22   6    3.03    0.79
   1  22   6    5.20    0.96
   1  22   6    3.81    0.81
  -1  22  -6    5.52    0.83
  -1  22  -6    3.46    0.63
  -1  22  -6    1.83    0.55
  -1 -22  -6    3.33    0.89
   1 -22   6    4.18    0.94
   1 -22   6    4.30    0.89
   1 -22   6    4.77    0.64
  -1 -22  -6    3.20    0.87
   1 -22   6    3.01    0.61
  -1 -22  -6    4.19    0.86
  -1 -22  -6    3.85    0.65
   1  22   8    0.06    0.67
   1  22   8    0.84    0.64
  -1  22  -8    1.17    0.49
   1  22   8    0.70    0.63
   1  22   8    1.22    0.68
  -1  22  -8    1.53    0.66
  -1 -22  -8    0.39    0.66
  -1 -22  -8    0.78    0.69
   1 -22   8    0.67    0.71
   1 -22   8    0.37    0.69
  -1 -22  -8    1.02    0.77
  -1 -22  -8    1.02    0.70
  -1 -22  -8    1.21    0.53
  -1 -22 -10    0.63    0.62
   1 -22  10   -0.64    0.48
   1 -23  -9    0.02    0.58
  -1  23   7    2.24    0.84
  -1  23   7    2.83    0.71
  -1  23   7    2.82    0.82
   1  23  -7    2.02    0.77
   1  23  -7    1.46    0.56
   1 -23  -7    1.99    0.82
  -1 -23   7    0.86    0.58
  -1 -23   7    1.77    0.83
  -1 -23   7    2.83    0.87
   1 -23  -7    3.07    0.82
   1 -23  -7    1.33    0.85
  -1 -23   7    2.48    0.59
   1  23  -5    0.50    0.66
  -1  23   5    1.25    0.68
  -1  23   5    0.43    0.56
   1  23  -5   -0.03    0.49
  -1  23   5    0.39    0.55
   1  23  -5    0.42    0.47
   1  23  -5    0.60    0.38
  -1 -23   5   -0.17    0.66
  -1 -23   5    0.49    0.70
  -1 -23   5   -0.38    0.43
   1 -23  -5    0.45    0.45
   1 -23  -5    0.72    0.70
  -1 -23   5   -0.36    0.43
  -1 -23   5   -0.21    0.45
   1 -23  -5    0.61    0.73
   1 -23  -5    0.04    0.55
   1  23  -3   -0.37    0.48
  -1  23   3    0.35    0.52
   1  23  -3   -0.37    0.45
   1  23  -3    0.22    0.40
  -1  23   3    0.04    0.59
  -1  23   3    0.43    0.51
   1  23  -3   -0.16    0.55
   1 -23  -3    0.15    0.49
  -1 -23   3    0.26    0.66
   1 -23  -3   -0.04    0.61
  -1 -23   3    0.31    0.55
  -1 -23   3   -0.85    0.62
   1 -23  -3    0.20    0.63
   1 -23  -3    0.25    0.51
  -1 -23   3    0.23    0.43
  -1 -23   3    0.32    0.47
  -1  23   1    1.07    0.62
  -1  23   1   -0.39    0.46
  -1  23   1    0.45    0.54
   1  23  -1    0.70    0.58
   1  23  -1    0.19    0.52
  -1  23   1    0.20    0.45
   1  23  -1    0.16    0.42
   1 -23  -1    0.54    0.66
   1 -23  -1    0.00    0.64
   1 -23  -1    0.47    0.50
  -1 -23   1    0.34    0.64
  -1 -23   1    1.09    0.55
  -1 -23   1    0.55    0.52
  -1 -23   1    0.59    0.64
   1 -23  -1    0.77    0.54
  -1  23  -1    0.18    0.40
  -1  23  -1   -0.20    0.49
  -1  23  -1   -0.05    0.52
   1  23   1    0.02    0.56
   1  23   1    1.50    0.54
   1  23   1    1.07    0.62
   1  23   1    0.02    0.56
  -1 -23  -1    0.54    0.69
   1 -23   1    0.18    0.48
  -1 -23  -1    0.39    0.50
   1 -23   1    0.36    0.50
   1 -23   1    0.81    0.68
  -1 -23  -1    0.20    0.65
   1 -23   1   -0.59    0.59
  -1 -23  -1    0.23    0.54
   1  23   3   -0.32    0.52
  -1  23  -3   -0.29    0.47
  -1  23  -3   -0.32    0.35
   1  23   3    0.68    0.54
  -1  23  -3   -0.39    0.49
   1  23   3   -0.10    0.54
   1  23   3    0.98    0.64
  -1  23  -3   -0.01    0.48
  -1 -23  -3   -0.52    0.47
  -1 -23  -3   -0.40    0.53
  -1 -23  -3   -0.55    0.61
   1 -23   3   -0.03    0.67
   1 -23   3   -0.24    0.41
   1 -23   3    0.81    0.67
  -1 -23  -3   -0.88    0.63
  -1  23  -5    0.06    0.47
   1  23   5    0.77    0.67
  -1  23  -5    0.98    0.61
   1  23   5    0.38    0.57
   1  23   5    0.90    0.60
   1  23   5    0.44    0.55
  -1  23  -5   -0.01    0.40
   1 -23   5    0.48    0.69
  -1 -23  -5    0.59    0.62
   1 -23   5    1.00    0.45
   1 -23   5   -0.12    0.66
  -1 -23  -5    0.43    0.70
  -1 -23  -5    0.31    0.68
  -1 -23  -5    0.55    0.52
   1  23   7    3.61    0.83
  -1  23  -7    2.12    0.59
   1  23   7    1.85    0.83
  -1  23  -7    3.55    0.77
   1  23   7    2.47    0.73
   1  23   7    1.34    0.69
   1 -23   7    2.76    0.82
  -1 -23  -7    1.64    0.60
  -1 -23  -7    2.25    0.79
  -1 -23  -7    1.82    0.84
   1 -23   7    1.81    0.84
  -1 -23  -7    1.60    0.83
   1 -23   7    3.28    0.67
  -1 -23  -9   -0.29    0.57
   1  24  -6    0.36    0.46
   1  24  -6    0.46    0.71
  -1  24   6    0.65    0.60
  -1  24   6    1.07    0.86
   1  24  -6    1.43    0.57
  -1  24   6    2.97    0.71
   1 -24  -6    0.08    0.75
  -1 -24   6    0.84    0.53
  -1 -24   6    0.77    0.49
  -1 -24   6    1.46    0.82
  -1 -24   6    1.89    0.83
   1 -24  -6   -0.21    0.60
   1 -24  -6    0.62    0.75
   1 -24  -6    1.14    0.63
  -1 -24   6    0.86    0.51
  -1  24   4    1.84    0.63
   1  24  -4    1.00    0.48
   1  24  -4    1.25    0.60
  -1  24   4    0.68    0.67
   1  24  -4    1.40    0.55
   1  24  -4    1.21    0.68
  -1 -24   4    1.09    0.63
  -1 -24   4    0.77    0.50
   1 -24  -4    0.93    0.60
  -1 -24   4    1.76    0.57
   1 -24  -4    1.03    0.78
   1 -24  -4    1.27    0.75
  -1 -24   4    0.80    0.73
  -1 -24   4    1.76    0.81
  -1  24   2    0.39    0.55
   1  24  -2    0.95    0.48
   1  24  -2    0.93    0.56
  -1  24   2    0.98    0.56
   1  24  -2    1.39    0.64
  -1  24   2    1.51    0.67
   1  24  -2    1.32    0.60
  -1  24   2    1.04    0.60
   1 -24  -2    0.80    0.55
  -1 -24   2    0.28    0.54
   1 -24  -2    2.06    0.78
  -1 -24   2    1.72    0.75
   1 -24  -2    1.17    0.75
  -1 -24   2    1.42    0.68
  -1 -24   2    0.56    0.71
   1 -24  -2    1.90    0.58
  -1  24   0    3.18    0.70
   1  24   0    2.98    0.66
   1  24   0    2.94    0.68
  -1  24   0    2.77    0.62
   1  24   0    0.43    0.62
   1  24   0    2.46    0.75
  -1  24   0    2.34    0.67
  -1  24   0    3.33    0.76
  -1 -24   0    3.39    0.71
  -1 -24   0    3.21    0.87
   1 -24   0    4.08    0.91
  -1 -24   0    2.89    0.71
   1 -24   0    1.91    0.80
   1 -24   0    3.98    0.75
  -1 -24   0    4.53    0.93
   1  24   2    0.45    0.56
   1  24   2    0.77    0.67
   1  24   2    1.11    0.61
  -1  24  -2    1.05    0.57
   1  24   2    1.19    0.57
  -1  24  -2    1.07    0.49
  -1  24  -2    1.05    0.55
  -1  24  -2    1.32    0.64
  -1 -24  -2    1.78    0.78
   1 -24   2    0.84    0.55
   1 -24   2    1.21    0.54
   1 -24   2    1.24    0.72
  -1 -24  -2    0.92    0.56
  -1 -24  -2   -0.31    0.64
   1  24   4    1.99    0.63
   1  24   4    0.98    0.61
  -1  24  -4    1.22    0.56
   1  24   4    1.05    0.65
  -1  24  -4    1.11    0.44
   1  24   4    1.92    0.78
  -1  24  -4    0.97    0.53
  -1  24  -4    1.60    0.67
   1 -24   4    0.97    0.50
   1 -24   4    2.21    0.82
   1 -24   4    1.36    0.58
  -1 -24  -4    1.44    0.65
  -1 -24  -4    1.36    0.69
   1 -24   4    1.16    0.76
   1  24   6    1.22    0.63
  -1  24  -6   -0.23    0.53
   1  24   6    0.45    0.80
   1  24   6    1.38    0.68
  -1  24  -6    0.83    0.54
  -1  24  -6    1.28    0.46
   1 -24   6    0.47    0.47
   1 -24   6    1.60    0.62
   1 -24   6    1.33    0.76
  -1 -24  -6    1.19    0.70
  -1 -24  -6    0.52    0.57
  -1 -24  -6    1.51    0.82
   1 -24   6    0.78    0.75
  -1 -24  -6    0.45    0.73
  -1  25   5    2.18    0.72
   1  25  -5    1.60    0.58
  -1  25   5    1.63    0.66
   1  25  -5    1.14    0.51
  -1 -25   5    1.34    0.68
   1 -25  -5    1.41    0.87
  -1 -25   5    2.23    0.94
   1 -25  -5    2.26    0.77
   1 -25  -5    3.42    0.91
  -1 -25   5    0.70    0.60
  -1 -25   5    0.83    0.54
   1 -25  -5    1.59    0.57
  -1  25   3   -0.16    0.50
  -1  25   3    0.66    0.65
   1  25  -3    0.42    0.55
   1  25  -3   -0.09    0.53
  -1  25   3    0.56    0.68
   1  25  -3    0.06    0.44
  -1 -25   3    0.59    0.74
  -1 -25   3    0.61    0.53
  -1 -25   3    0.36    0.73
   1 -25  -3    0.07    0.72
   1 -25  -3    0.07    0.70
  -1 -25   3    1.14    0.54
   1 -25  -3   -0.32    0.52
  -1  25   1    0.31    0.48
   1  25  -1    0.47    0.55
   1  25  -1    1.30    0.62
   1  25  -1    0.05    0.56
   1  25  -1    0.03    0.56
  -1  25   1    0.99    0.58
  -1  25   1    0.65    0.62
  -1  25   1    0.24    0.58
   1 -25  -1    0.13    0.53
  -1 -25   1    1.24    0.63
   1 -25  -1    0.56    0.73
   1 -25  -1    0.83    0.52
  -1 -25   1   -0.13    0.68
  -1 -25   1    0.51    0.54
   1 -25  -1    1.03    0.77
  -1 -25   1   -0.39    0.67
  -1  25  -1    0.47    0.57
   1  25   1    0.64    0.53
  -1  25  -1    0.80    0.60
  -1  25  -1    1.20    0.61
  -1  25  -1    0.00    0.42
   1  25   1    0.13    0.58
   1  25   1    0.70    0.63
   1 -25   1    1.60    0.61
  -1 -25  -1    1.38    0.76
  -1 -25  -1    0.40    0.76
  -1 -25  -1    1.21    0.60
   1 -25   1    1.30    0.72
  -1 -25  -1    0.44    0.54
   1 -25   1    0.70    0.54
   1 -25   1    0.33    0.70
   1  25   3    0.14    0.56
   1  25   3    0.10    0.54
   1  25   3    0.39    0.69
   1  25   3   -0.06    0.52
  -1  25  -3    0.48    0.55
  -1  25  -3   -0.06    0.50
  -1  25  -3    0.98    0.59
  -1  25  -3   -0.13    0.40
   1 -25   3    0.03    0.68
   1 -25   3    1.11    0.64
   1 -25   3    0.49    0.51
  -1 -25  -3    0.52    0.76
   1 -25   3   -0.58    0.64
  -1 -25  -3    1.00    0.74
  -1 -25  -3    0.24    0.53
  -1 -25  -3    0.37    0.62
   1  25   5    0.57    0.62
  -1  25  -5    0.80    0.55
   1  25   5    1.58    0.69
  -1  25  -5    1.75    0.55
   1 -25   5    1.11    0.59
  -1 -25  -5    1.81    0.75
   1 -25   5    1.95    0.59
  -1 -25  -5    1.53    0.85
  -1 -25  -5    1.16    0.58
  -1 -25  -5    0.79    0.90
   1 -25   5    1.49    0.80
  -1  26   2    1.27    0.65
   1  26  -2   -0.02    0.50
   1  26  -2    0.40    0.58
  -1  26   2    0.30    0.50
   1  26  -2    0.52    0.61
  -1 -26   2   -0.15    0.73
   1 -26  -2   -0.12    0.71
   1 -26  -2    1.30    0.77
   1 -26  -2    0.73    0.59
  -1 -26   2    1.39    0.59
   1 -26  -2    0.83    0.58
  -1 -26   2   -0.26    0.51
  -1  26   0   -0.07    0.64
   1  26   0    0.00    0.49
   1  26   0    0.03    0.61
  -1  26   0    0.47    0.49
  -1  26   0   -0.51    0.57
   1  26   0    0.16    0.57
  -1  26   0   -0.03    0.55
  -1 -26   0    0.24    0.76
   1 -26   0    0.45    0.78
  -1 -26   0    0.47    0.69
   1 -26   0   -0.40    0.50
  -1 -26   0    0.17    0.55
   1 -26   0   -0.35    0.67
  -1 -26   0    0.51    0.56
   1 -26   0    0.38    0.53
   1  26   2   -0.26    0.59
   1  26   2    0.25    0.55
  -1  26  -2    1.21    0.61
   1  26   2    0.25    0.53
  -1  26  -2    0.53    0.45
  -1  26  -2    0.70    0.62
   1 -26   2    0.96    0.57
   1 -26   2    0.19    0.50
  -1 -26  -2   -0.09    0.59
  -1 -26  -2    0.42    0.85
  -1 -26  -2    0.90    0.58
  -1 -26  -2    1.09    0.76
   1 -26   2    0.35    0.72
   2   0 -16    4.11    0.69
  -2   0  16    4.55    0.69
  -2   0  16    6.11    0.90
  -2   0  16    5.58    0.80
   2   0 -16    4.02    0.77
  -2   0  16    4.11    0.74
   2   0 -14    5.86    0.84
  -2   0  14    6.40    0.84
  -2   0  14    6.62    0.85
   2   0 -14    5.79    0.72
   2   0 -14    6.39    1.05
  -2   0  14    5.85    0.74
  -2   0  14    7.99    0.96
   2   0 -14    4.56    0.72
  -2   0  12    2.73    0.56
  -2   0  12    2.29    0.74
  -2   0  12    2.63    0.53
   2   0 -12    2.44    0.68
   2   0 -12    2.85    0.57
   2   0 -12    1.79    0.43
   2   0 -12    2.11    0.43
  -2   0  12    2.45    0.47
   2   0 -10   23.19    1.84
  -2   0  10   21.57    1.85
   2   0 -10   23.29    1.83
   2   0 -10   20.07    1.88
  -2   0  10   20.98    1.85
  -2   0  10   20.33    1.86
  -2   0  10   20.54    1.91
   2   0 -10   20.46    1.97
   2   0  -8   11.23    1.03
  -2   0   8   10.84    1.05
  -2   0   8   11.90    1.13
  -2   0   8    9.76    1.05
   2   0  -8   11.86    1.11
  -2   0   8   13.31    1.09
   2   0  -8   11.57    1.04
  -2   0   8   10.52    1.00
   2   0  -6    8.01    0.94
  -2   0   6    8.11    0.80
   2   0  -6    6.42    0.73
   2   0  -6    9.11    0.91
  -2   0   6    7.54    0.75
  -2   0   6    7.18    0.82
   2   0  -6    6.87    0.72
  -2   0   6    6.60    0.75
  -2   0   6    6.28    0.70
   2   0  -6    8.52    0.84
   2   0  -6    7.23    0.73
  -2   0   6    5.91    0.77
  -2   0   6    7.05    0.75
  -2   0   4  104.13    8.51
   2   0  -4  102.06    8.49
  -2   0   4  105.07    8.51
  -2   0   4  102.46    8.49
  -2   0   4  111.28    8.50
  -2   0   4  103.42    8.51
   2   0  -4  107.95    8.51
  -2   0   4  107.56    8.51
   2   0  -4  123.16    8.50
  -2   0   4  103.85    8.57
   2   0  -4   99.90    8.51
   2   0  -4  113.24    8.52
   2   0  -4  110.78    8.50
   2   0  -4  101.58    8.57
  -2   0   4  118.03    8.50
  -2   0   4   96.57    8.54
  -2   0   2   63.53    5.31
   2   0  -2   72.09    5.32
  -2   0   2   65.15    5.32
  -2   0   2   73.25    5.32
   2   0  -2   65.43    5.31
   2   0  -2   63.02    5.32
  -2   0   2   66.54    5.31
   2   0  -2   70.14    5.33
   2   0  -2   69.56    5.31
  -2   0   2   65.02    5.32
   2   0  -2   66.15    5.33
  -2   0   2   66.74    5.32
  -2   0   2   63.97    5.32
  -2   0   2   67.37    5.34
   2   0  -2   66.08    5.32
  -2   0   0  531.68   47.63
   2   0   0  653.44   47.61
   2   0   0  608.86   47.64
  -2   0   0  663.29   47.61
   2   0   0  631.49   47.62
   2   0   0  515.39   47.61
   2   0   0  645.97   47.62
  -2   0   0  656.15   47.64
   2   0   0  575.69   47.63
   2   0   0  545.18   47.63
   2   0   0  637.27   47.63
  -2   0   0  586.04   47.62
  -2   0   0  582.32   47.62
  -2   0  -2   67.14    5.40
   2   0   2   66.46    5.40
   2   0   2   68.08    5.41
   2   0   2   64.61    5.38
  -2   0  -2   66.88    5.38
   2   0   2   66.43    5.39
  -2   0  -2   68.12    5.39
  -2   0  -2   71.77    5.38
  -2   0  -2   65.68    5.40
   2   0   2   73.04    5.38
   2   0   4   85.46    7.52
  -2   0  -4   95.56    7.49
  -2   0  -4   90.05    7.52
   2   0   4   99.64    7.50
   2   0   4  105.54    7.55
   2   0   4   93.27    7.52
  -2   0  -4   96.64    7.50
   2   0   4   99.05    7.50
  -2   0  -4   92.68    7.52
  -2   0  -4   84.87    7.54
   2   0   6    5.71    0.68
   2   0   6    5.60    0.61
   2   0   6    6.73    0.70
  -2   0  -6    7.19    0.68
  -2   0  -6    6.22    0.70
  -2   0  -6    6.04    0.65
  -2   0  -6    7.34    0.86
   2   0   6    7.09    0.68
   2   0   6    6.24    0.67
   2   0   6    7.27    0.87
  -2   0  -6    7.19    0.70
  -2   0  -8    9.92    0.94
  -2   0  -8    9.99    1.10
   2   0   8    9.34    0.90
   2   0   8   10.83    0.98
  -2   0  -8    9.94    1.04
  -2   0  -8   10.46    1.13
   2   0   8    9.66    0.88
   2   0   8    8.99    0.91
  -2   0  -8    8.16    0.88
  -2   0 -10   19.90    1.81
  -2   0 -10   21.57    1.95
   2   0  10   21.88    1.86
  -2   0 -10   22.76    1.92
   2   0  10   19.06    1.78
   2   0  12    2.90    0.58
  -2   0 -12    2.90    0.62
   2   0  12    2.40    0.42
  -2   0 -12    1.81    0.51
   2   0  12    1.95    0.44
   2   0  12    2.34    0.47
  -2   0 -12    3.39    0.74
  -2   0 -14    5.40    0.78
   2   0  14    4.79    0.71
   2   0  14    7.39    0.89
   2   0  14    6.38    0.82
  -2   0 -14    8.24    1.04
   2   0  16    4.81    0.72
   2   0  16    4.59    0.80
  -2   0 -16    3.34    0.70
  -2   0 -16    7.06    1.08
  -2   1  17    0.09    0.43
  -2   1  17    0.47    0.49
   2   1 -17   -0.26    0.39
  -2   1  17   -0.16    0.53
   2   1 -17    0.16    0.53
  -2  -1  17    0.24    0.56
   2  -1 -17   -0.42    0.40
  -2  -1  17   -0.37    0.41
   2  -1 -17   -0.07    0.54
  -2  -1  17    0.78    0.49
  -2   1  15    0.28    0.38
   2   1 -15    0.47    0.47
  -2   1  15    1.13    0.47
  -2   1  15    0.67    0.45
  -2   1  15    0.70    0.50
   2   1 -15   -0.15    0.39
   2   1 -15    0.12    0.36
  -2  -1  15   -0.07    0.38
  -2  -1  15    0.59    0.42
   2  -1 -15    0.94    0.55
   2  -1 -15    0.38    0.66
  -2  -1  15    0.37    0.45
  -2  -1  15    0.50    0.50
   2  -1 -15    0.06    0.37
  -2   1  13    1.67    0.51
  -2   1  13    1.19    0.49
   2   1 -13    1.35    0.39
  -2   1  13    0.36    0.39
   2   1 -13    0.44    0.46
  -2   1  13    1.11    0.42
   2   1 -13    1.84    0.67
   2   1 -13    0.91    0.39
  -2  -1  13    0.76    0.40
   2  -1 -13    1.33    0.53
   2  -1 -13    2.32    0.41
   2  -1 -13    1.07    0.64
  -2  -1  13    1.50    0.41
  -2  -1  13    0.65    0.42
  -2  -1  13    0.56    0.47
   2  -1 -13    1.15    0.41
  -2   1  11    1.29    0.43
  -2   1  11    1.34    0.42
   2   1 -11    1.83    0.37
   2   1 -11    1.19    0.36
  -2   1  11    1.38    0.49
   2   1 -11    1.06    0.55
   2   1 -11    0.82    0.44
  -2  -1  11    1.14    0.46
   2  -1 -11    1.22    0.35
  -2  -1  11    1.30    0.38
   2  -1 -11    1.11    0.35
   2  -1 -11    1.50    0.58
  -2  -1  11    2.09    0.40
  -2  -1  11    1.64    0.44
  -2   1   9    3.55    0.50
   2   1  -9    1.89    0.37
  -2   1   9    2.65    0.49
   2   1  -9    3.75    0.56
  -2   1   9    2.30    0.39
   2   1  -9    3.08    0.41
  -2   1   9    2.93    0.46
   2   1  -9    2.44    0.48
  -2   1   9    2.20    0.41
  -2  -1   9    2.69    0.44
   2  -1  -9    2.08    0.39
   2  -1  -9    2.40    0.49
  -2  -1   9    2.50    0.45
   2  -1  -9    2.81    0.41
  -2  -1   9    2.96    0.48
  -2  -1   9    3.01    0.43
   2  -1  -9    2.32    0.82
  -2  -1   9    2.20    0.38
   2  -1  -9    2.77    0.39
   2   1  -7   34.10    2.87
  -2   1   7   38.16    2.86
   2   1  -7   31.41    2.83
   2   1  -7   30.24    2.82
  -2   1   7   33.61    2.81
   2   1  -7   35.44    2.83
   2   1  -7   36.43    2.91
   2   1  -7   33.06    2.83
  -2   1   7   34.70    2.87
  -2   1   7   33.97    2.82
  -2   1   7   37.37    2.89
  -2   1   7   32.91    2.82
  -2  -1   7   32.65    2.81
   2  -1  -7   34.29    2.83
  -2  -1   7   36.61    2.84
   2  -1  -7   35.66    2.89
   2  -1  -7   39.96    2.83
  -2  -1   7   34.10    2.82
  -2  -1   7   34.35    2.83
  -2  -1   7   36.07    2.88
  -2  -1   7   30.21    2.83
  -2  -1   7   35.77    2.86
   2  -1  -7   34.77    2.91
   2  -1  -7   35.58    2.84
  -2   1   5   57.07    4.37
   2   1  -5   56.03    4.34
   2   1  -5   52.91    4.47
  -2   1   5   53.07    4.36
   2   1  -5   55.20    4.35
   2   1  -5   51.24    4.37
  -2   1   5   53.82    4.35
  -2   1   5   54.55    4.37
  -2   1   5   54.92    4.36
   2   1  -5   54.99    4.37
  -2   1   5   55.89    4.36
  -2   1   5   55.45    4.34
  -2   1   5   54.89    4.33
   2  -1  -5   55.83    4.35
  -2  -1   5   53.24    4.36
   2  -1  -5   58.76    4.39
  -2  -1   5   50.35    4.33
  -2  -1   5   53.44    4.36
  -2  -1   5   54.20    4.36
   2  -1  -5   50.78    4.34
  -2  -1   5   52.66    4.38
   2  -1  -5   58.59    4.35
  -2  -1   5   54.18    4.34
   2  -1  -5   55.83    4.37
   2  -1  -5   51.30    4.37
  -2  -1   5   52.87    4.39
   2  -1  -5   50.51    4.36
  -2  -1   5   52.44    4.37
  -2   1   3   21.57    1.86
   2   1  -3   25.01    1.86
  -2   1   3   21.14    1.88
   2   1  -3   20.22    1.87
   2   1  -3   26.82    1.89
  -2   1   3   22.00    1.88
  -2   1   3   21.42    1.91
   2   1  -3   22.46    1.89
   2   1  -3   24.30    1.86
  -2   1   3   22.21    1.86
  -2   1   3   23.62    1.85
   2   1  -3   24.93    1.86
  -2   1   3   19.78    1.85
  -2   1   3   23.08    1.88
   2   1  -3   23.94    1.88
  -2   1   3   24.08    1.87
  -2  -1   3   18.64    1.88
   2  -1  -3   23.70    1.87
  -2  -1   3   22.61    1.90
  -2  -1   3   19.78    1.86
   2  -1  -3   21.98    1.85
   2  -1  -3   20.19    1.90
  -2  -1   3   25.12    1.87
  -2  -1   3   23.89    1.87
   2  -1  -3   21.44    1.87
   2  -1  -3   23.69    1.85
   2  -1  -3   20.03    1.89
  -2  -1   3   23.90    1.86
  -2  -1   3   25.44    1.85
   2  -1  -3   24.58    1.88
   2  -1  -3   21.68    1.84
  -2  -1   3   23.98    1.88
  -2   1   1  267.37   20.46
   2   1  -1  257.44   20.47
  -2   1   1  260.12   20.47
   2   1  -1  271.20   20.48
  -2   1   1  256.63   20.46
  -2   1   1  264.52   20.47
  -2   1   1  246.38   20.47
   2   1  -1  253.07   20.47
  -2   1   1  267.32   20.46
   2   1  -1  248.94   20.47
   2   1  -1  258.92   20.46
   2   1  -1  245.32   20.47
  -2   1   1  260.06   20.47
   2   1  -1  267.55   20.47
  -2   1   1  251.23   20.46
   2   1  -1  248.20   20.46
   2   1  -1  290.65   20.47
  -2   1   1  249.96   20.47
  -2   1   1  236.13   20.47
   2   1  -1  273.07   20.46
  -2   1   1  261.32   20.46
   2   1  -1  251.15   20.47
  -2  -1   1  245.87   20.47
   2  -1  -1  260.53   20.46
   2  -1  -1  260.86   20.46
   2  -1  -1  249.50   20.47
  -2  -1   1  279.25   20.47
  -2  -1   1  235.50   20.46
  -2  -1   1  250.63   20.47
  -2  -1   1  270.06   20.47
   2  -1  -1  272.58   20.46
   2  -1  -1  260.51   20.47
  -2  -1   1  261.68   20.47
  -2  -1   1  268.75   20.48
  -2  -1   1  261.65   20.47
   2  -1  -1  242.92   20.47
   2  -1  -1  269.82   20.47
   2  -1  -1  248.61   20.47
  -2  -1   1  256.48   20.46
  -2  -1   1  271.23   20.46
   2  -1  -1  258.02   20.47
   2   1   1  228.33   19.46
   2   1   1  245.21   19.48
   2   1   1  246.28   19.48
  -2   1  -1  267.37   19.47
   2   1   1  240.66   19.47
   2   1   1  254.97   19.48
  -2   1  -1  252.02   19.48
  -2   1  -1  251.39   19.48
   2   1   1  215.64   19.46
   2   1   1  252.46   19.47
  -2   1  -1  247.77   19.47
  -2   1  -1  245.87   19.47
   2   1   1  258.96   19.47
   2   1   1  251.09   19.48
   2   1   1  240.51   19.47
  -2   1  -1  232.10   19.46
   2   1   1  256.57   19.47
   2  -1   1  253.24   19.48
  -2  -1  -1  215.79   19.47
  -2  -1  -1  232.93   19.46
  -2  -1  -1  258.34   19.48
   2  -1   1  255.45   19.47
   2  -1   1  230.16   19.46
  -2  -1  -1  228.21   19.47
   2  -1   1  261.62   19.48
  -2  -1  -1  247.71   19.47
   2  -1   1  252.80   19.47
   2  -1   1  263.26   19.47
  -2  -1  -1  236.36   19.48
  -2  -1  -1  262.03   19.47
  -2  -1  -1  252.57   19.48
  -2  -1  -1  251.87   19.47
  -2  -1  -1  237.29   19.47
   2   1   3   22.80    1.75
   2   1   3   20.76    1.77
   2   1   3   20.44    1.78
   2   1   3   22.45    1.76
  -2   1  -3   23.12    1.78
   2   1   3   18.45    1.77
  -2   1  -3   22.62    1.75
   2   1   3   20.82    1.82
  -2   1  -3   22.90    1.79
   2  -1   3   24.23    1.78
  -2  -1  -3   21.51    1.78
  -2  -1  -3   21.58    1.76
  -2  -1  -3   18.43    1.79
  -2  -1  -3   20.22    1.79
   2  -1   3   20.15    1.81
   2  -1   3   22.32    1.75
  -2  -1  -3   20.17    1.82
  -2   1  -5   54.59    4.24
   2   1   5   50.86    4.22
   2   1   5   52.44    4.19
  -2   1  -5   52.07    4.19
   2   1   5   50.58    4.20
  -2   1  -5   55.95    4.23
   2   1   5   46.54    4.17
   2   1   5   54.95    4.22
   2   1   5   52.15    4.21
   2   1   5   49.42    4.23
  -2  -1  -5   50.06    4.24
   2  -1   5   53.72    4.20
  -2  -1  -5   54.10    4.21
   2  -1   5   51.84    4.23
  -2  -1  -5   52.65    4.21
   2  -1   5   53.72    4.22
   2  -1   5   53.67    4.19
  -2  -1  -5   53.48    4.21
  -2  -1  -5   53.24    4.24
   2   1   7   32.14    2.68
   2   1   7   33.80    2.70
   2   1   7   32.04    2.71
  -2   1  -7   31.61    2.69
  -2   1  -7   33.79    2.77
  -2   1  -7   34.44    2.80
  -2   1  -7   32.79    2.70
   2   1   7   34.34    2.73
   2   1   7   32.43    2.71
  -2  -1  -7   33.79    2.72
   2  -1   7   32.46    2.70
  -2  -1  -7   37.76    2.79
   2  -1   7   31.94    2.67
  -2  -1  -7   29.01    2.70
   2  -1   7   34.32    2.73
  -2  -1  -7   35.70    2.81
  -2  -1  -7   31.34    2.74
   2   1   9    2.09    0.36
   2   1   9    1.89    0.37
  -2   1  -9    1.84    0.35
  -2   1  -9    2.42    0.39
   2   1   9    2.48    0.34
  -2   1  -9    2.48    0.46
  -2   1  -9    2.74    0.54
   2   1   9    1.59    0.39
   2   1   9    2.59    0.42
   2  -1   9    2.18    0.39
   2  -1   9    2.60    0.34
   2  -1   9    2.96    0.39
   2  -1   9    2.35    0.38
  -2  -1  -9    2.03    0.38
  -2  -1  -9    2.60    0.53
   2  -1   9    3.21    0.47
  -2  -1  -9    1.85    0.42
  -2  -1  -9    1.83    0.46
  -2   1 -11    1.37    0.50
   2   1  11    0.47    0.35
   2   1  11    1.51    0.45
  -2   1 -11    2.00    0.58
   2   1  11    0.72    0.34
   2   1  11    0.73    0.40
  -2   1 -11    1.18    0.41
   2   1  11    1.39    0.35
   2   1  11    0.34    0.33
   2  -1  11    0.73    0.37
   2  -1  11    0.90    0.55
   2  -1  11    1.59    0.36
  -2  -1 -11    1.52    0.58
   2  -1  11    1.31    0.33
  -2  -1 -11    0.76    0.49
  -2  -1 -11    1.71    0.44
   2   1  13    1.84    0.53
   2   1  13    1.88    0.47
  -2   1 -13    1.64    0.47
  -2   1 -13    1.43    0.64
   2   1  13    1.58    0.40
  -2   1 -13    2.51    0.61
   2   1  13    0.74    0.40
   2  -1  13    1.37    0.50
   2  -1  13    1.03    0.41
  -2  -1 -13    0.88    0.47
  -2  -1 -13    2.02    0.62
   2  -1  13    0.99    0.48
  -2  -1 -13    1.04    0.63
   2   1  15    0.34    0.44
   2   1  15    0.53    0.54
  -2   1 -15    0.18    0.46
  -2   1 -15    0.58    0.66
   2   1  15   -0.01    0.34
   2  -1  15    0.07    0.46
   2  -1  15    0.15    0.35
  -2  -1 -15    0.22    0.46
  -2  -1 -15   -0.18    0.62
  -2   1 -17   -0.05    0.49
   2   1  17   -0.44    0.42
   2   1  17    0.11    0.52
  -2   1 -17   -0.46    0.67
   2  -1  17   -0.32    0.51
   2  -1  17    0.50    0.43
  -2  -1 -17   -0.98    0.47
  -2   2  16    0.30    0.44
  -2   2  16    0.45    0.45
   2   2 -16    1.07    0.54
  -2   2  16   -0.08    0.40
  -2   2  16    0.23    0.51
   2   2 -16   -0.09    0.37
   2  -2 -16    0.91    0.72
  -2  -2  16   -0.09    0.42
  -2  -2  16   -0.14    0.37
   2  -2 -16    0.72    0.40
  -2  -2  16    0.17    0.51
  -2  -2  16    0.01    0.43
   2   2 -14    0.32    0.47
   2   2 -14   -0.04    0.34
  -2   2  14   -0.02    0.40
  -2   2  14    0.77    0.42
  -2   2  14    0.00    0.41
   2   2 -14   -0.55    0.33
  -2  -2  14   -0.24    0.34
  -2  -2  14    0.24    0.42
   2  -2 -14    0.75    0.52
  -2  -2  14    0.11    0.48
  -2  -2  14    0.23    0.35
   2  -2 -14    0.06    0.64
   2  -2 -14    0.16    0.38
   2  -2 -14    0.07    0.34
   2   2 -12    6.90    0.80
  -2   2  12    7.81    0.91
   2   2 -12    9.53    1.06
  -2   2  12    7.57    0.95
  -2   2  12    7.46    0.85
   2   2 -12    6.43    0.79
  -2   2  12    7.62    0.89
  -2   2  12    6.72    0.84
  -2  -2  12    5.72    0.79
   2  -2 -12    6.62    0.87
   2  -2 -12    8.74    1.06
  -2  -2  12    6.22    0.85
  -2  -2  12    6.92    0.91
  -2  -2  12    8.02    0.89
   2  -2 -12    8.19    0.81
   2  -2 -12    9.47    1.02
   2   2 -10   16.69    1.56
  -2   2  10   15.30    1.42
  -2   2  10   16.77    1.46
  -2   2  10   17.48    1.51
   2   2 -10   13.34    1.38
  -2   2  10   15.45    1.39
   2   2 -10   16.87    1.40
   2   2 -10   13.55    1.44
   2  -2 -10   15.80    1.48
  -2  -2  10   15.07    1.39
   2  -2 -10   16.47    1.56
   2  -2 -10   15.97    1.38
  -2  -2  10   13.32    1.37
  -2  -2  10   15.58    1.43
   2  -2 -10   14.77    1.39
  -2  -2  10   16.73    1.50
   2   2  -8   43.70    3.46
  -2   2   8   42.41    3.39
  -2   2   8   41.32    3.40
   2   2  -8   39.64    3.41
   2   2  -8   44.32    3.39
   2   2  -8   39.61    3.39
  -2   2   8   44.94    3.42
  -2   2   8   41.04    3.44
   2   2  -8   39.81    3.38
   2  -2  -8   41.28    3.38
  -2  -2   8   36.53    3.36
   2  -2  -8   42.24    3.43
  -2  -2   8   41.59    3.43
   2  -2  -8   44.02    3.47
  -2  -2   8   43.92    3.42
   2  -2  -8   41.47    3.37
   2  -2  -8   42.24    3.40
  -2  -2   8   40.23    3.38
  -2  -2   8   41.29    3.38
  -2   2   6   31.50    2.62
   2   2  -6   30.54    2.59
   2   2  -6   32.01    2.63
   2   2  -6   29.94    2.62
  -2   2   6   30.64    2.64
  -2   2   6   30.76    2.63
   2   2  -6   28.98    2.58
  -2   2   6   32.42    2.58
   2   2  -6   31.17    2.58
  -2   2   6   34.94    2.62
  -2   2   6   33.60    2.61
  -2  -2   6   27.81    2.64
  -2  -2   6   30.80    2.57
  -2  -2   6   26.82    2.59
  -2  -2   6   31.25    2.62
  -2  -2   6   31.45    2.59
   2  -2  -6   31.13    2.61
   2  -2  -6   33.45    2.67
  -2  -2   6   31.05    2.61
   2  -2  -6   36.79    2.66
   2  -2  -6   34.06    2.63
   2  -2  -6   35.38    2.59
  -2  -2   6   31.29    2.61
  -2  -2   6   29.68    2.60
   2  -2  -6   34.76    2.64
   2  -2  -6   32.12    2.63
  -2   2   4   63.66    4.66
   2   2  -4   58.87    4.64
  -2   2   4   55.02    4.68
   2   2  -4   60.90    4.63
   2   2  -4   57.68    4.62
   2   2  -4   57.32    4.63
  -2   2   4   53.46    4.63
  -2   2   4   59.63    4.69
   2   2  -4   54.61    4.63
  -2   2   4   56.47    4.62
   2   2  -4   61.96    4.65
  -2  -2   4   58.81    4.63
   2  -2  -4   55.54    4.65
  -2  -2   4   58.50    4.63
   2  -2  -4   63.40    4.63
  -2  -2   4   58.00    4.63
  -2  -2   4   57.25    4.62
   2  -2  -4   56.37    4.64
   2  -2  -4   58.43    4.64
   2  -2  -4   55.44    4.67
  -2  -2   4   61.28    4.63
   2  -2  -4   53.63    4.63
  -2  -2   4   52.82    4.65
  -2  -2   4   57.95    4.62
  -2  -2   4   58.99    4.64
   2   2  -2    5.06    0.51
   2   2  -2    3.28    0.44
   2   2  -2    3.91    0.47
   2   2  -2    5.34    0.55
   2   2  -2    4.22    0.47
   2   2  -2    2.39    0.53
  -2  -2   2    4.22    0.48
  -2  -2   2    4.75    0.46
  -2  -2   2    5.49    0.57
  -2  -2   2    4.86    0.52
  -2  -2   2    4.04    0.49
  -2  -2   2    4.82    0.49
   2   2   0   16.87    1.31
   2   2   0   17.35    1.32
  -2   2   0   16.76    1.31
  -2   2   0   15.30    1.32
  -2   2   0   16.41    1.30
  -2   2   0   14.89    1.31
  -2   2   0   16.04    1.30
  -2   2   0   16.28    1.33
   2   2   0   16.62    1.31
   2   2   0   16.78    1.32
   2   2   0   17.10    1.32
   2   2   0   15.25    1.30
   2   2   0   14.90    1.32
   2   2   0   14.92    1.32
  -2   2   0   15.98    1.30
  -2   2   0   15.39    1.32
  -2  -2   0   15.77    1.33
  -2  -2   0   16.50    1.32
   2  -2   0   15.81    1.31
   2  -2   0   16.50    1.30
   2  -2   0   17.16    1.31
  -2  -2   0   15.26    1.31
   2  -2   0   16.49    1.30
  -2  -2   0   14.18    1.32
  -2  -2   0   15.95    1.30
   2  -2   0   16.28    1.32
  -2  -2   0   16.85    1.31
  -2  -2   0   17.72    1.31
   2  -2   0   15.69    1.30
   2  -2   0   15.43    1.32
   2  -2   0   15.87    1.33
  -2  -2   0   16.22    1.32
   2   2   2    1.03    0.23
  -2   2  -2    1.64    0.24
  -2   2  -2    1.00    0.19
  -2   2  -2    1.55    0.20
   2   2   2    1.64    0.23
  -2   2  -2    1.48    0.19
  -2   2  -2    1.21    0.24
   2   2   2    1.12    0.22
   2   2   2    1.29    0.28
   2   2   2    1.42    0.20
   2   2   2    1.03    0.25
   2   2   2    1.31    0.31
   2   2   2    1.54    0.27
  -2  -2  -2    1.09    0.31
   2  -2   2    0.77    0.23
  -2  -2  -2    1.09    0.25
  -2  -2  -2    1.30    0.19
   2  -2   2    1.26    0.19
  -2  -2  -2    0.86    0.23
  -2  -2  -2    1.67    0.33
  -2  -2  -2    1.32    0.27
  -2  -2  -2    1.47    0.19
   2  -2   2    1.41    0.20
   2  -2   2    1.27    0.23
  -2  -2  -2    1.04    0.22
   2  -2   2    1.45    0.20
  -2  -2  -2    1.59    0.22
  -2  -2  -2    0.98    0.25
   2   2   4   53.02    4.50
   2   2   4   54.35    4.53
   2   2   4   56.46    4.58
   2   2   4   55.04    4.52
   2   2   4   56.92    4.53
  -2   2  -4   63.71    4.53
   2   2   4   53.55    4.55
  -2  -2  -4   48.65    4.55
  -2  -2  -4   58.89    4.53
  -2  -2  -4   55.35    4.55
  -2  -2  -4   56.21    4.53
  -2  -2  -4   62.57    4.50
  -2  -2  -4   50.64    4.52
   2  -2   4   64.00    4.53
   2   2   6   33.18    2.52
   2   2   6   29.41    2.52
   2   2   6   29.86    2.50
   2   2   6   26.76    2.47
  -2   2  -6   33.45    2.56
   2   2   6   30.80    2.49
  -2   2  -6   32.95    2.53
  -2  -2  -6   30.76    2.52
   2  -2   6   27.27    2.50
   2  -2   6   29.30    2.51
   2  -2   6   28.93    2.52
  -2  -2  -6   31.96    2.58
  -2  -2  -6   29.74    2.50
  -2  -2  -6   32.09    2.51
  -2  -2  -6   31.02    2.56
  -2   2  -8   42.12    3.49
   2   2   8   41.01    3.42
   2   2   8   37.45    3.40
   2   2   8   42.34    3.44
  -2   2  -8   43.09    3.47
  -2   2  -8   45.76    3.48
   2   2   8   44.56    3.45
  -2  -2  -8   44.21    3.51
  -2  -2  -8   39.46    3.43
   2  -2   8   41.49    3.39
   2  -2   8   40.90    3.44
  -2  -2  -8   44.49    3.49
  -2  -2  -8   42.11    3.44
   2   2  10   14.48    1.34
  -2   2 -10   16.70    1.44
   2   2  10   13.19    1.30
   2   2  10   15.91    1.37
   2   2  10   15.24    1.32
  -2   2 -10   11.74    1.25
  -2   2 -10   14.70    1.50
  -2  -2 -10   15.55    1.49
  -2  -2 -10   17.42    1.49
  -2  -2 -10   14.12    1.36
   2  -2  10   14.04    1.36
   2  -2  10   18.00    1.50
   2  -2  10   12.09    1.26
  -2   2 -12    8.11    0.93
  -2   2 -12    5.89    0.78
   2   2  12    7.95    0.80
   2   2  12    5.81    0.76
   2   2  12    7.36    0.84
  -2   2 -12    7.05    0.94
   2   2  12    7.01    0.88
   2   2  12    7.29    0.90
  -2  -2 -12    7.43    1.00
   2  -2  12    6.86    0.80
  -2  -2 -12    7.54    0.94
   2  -2  12    6.58    0.77
   2  -2  12    6.88    0.85
   2  -2  12    6.74    0.84
   2   2  14    0.37    0.51
  -2   2 -14    0.51    0.57
   2   2  14    0.42    0.42
  -2   2 -14    0.30    0.56
   2   2  14   -0.36    0.37
   2   2  14    0.28    0.35
  -2  -2 -14   -0.04    0.45
  -2  -2 -14    0.72    0.65
   2  -2  14    0.01    0.43
   2  -2  14    0.25    0.33
  -2   2 -16    1.02    0.69
   2   2  16    0.08    0.47
   2   2  16    0.32    0.40
   2   2  16    0.38    0.52
   2  -2  16    0.30    0.52
   2  -2  16    0.13    0.37
  -2  -2 -16    0.94    0.49
  -2  -2 -16    0.51    0.70
  -2   3  17    0.57    0.48
  -2   3  17    1.51    0.63
  -2   3  17    0.01    0.47
  -2   3  17   -0.25    0.46
   2   3 -17    0.77    0.47
   2   3 -17    0.20    0.59
   2  -3 -17    0.70    0.59
  -2  -3  17   -0.03    0.42
  -2  -3  17    0.78    0.52
  -2  -3  17    0.41    0.55
   2  -3 -17    0.09    0.43
  -2  -3  17    0.09    0.42
   2   3 -15    2.13    0.59
  -2   3  15    2.41    0.54
  -2   3  15    2.42    0.58
   2   3 -15    1.93    0.50
  -2   3  15    1.95    0.54
   2   3 -15    1.41    0.46
   2  -3 -15    1.62    0.80
  -2  -3  15    1.90    0.52
   2  -3 -15    3.03    0.49
   2  -3 -15    2.55    0.66
  -2  -3  15    2.11    0.63
   2  -3 -15    2.77    0.52
  -2  -3  15    1.00    0.45
  -2   3  13    3.21    0.57
   2   3 -13    3.10    0.53
  -2   3  13    3.00    0.59
  -2   3  13    3.86    0.68
   2   3 -13    3.02    0.60
  -2   3  13    3.25    0.55
  -2   3  13    2.75    0.54
   2   3 -13    1.95    0.48
   2  -3 -13    2.84    0.50
  -2  -3  13    3.66    0.68
   2  -3 -13    4.62    0.83
  -2  -3  13    2.98    0.59
   2  -3 -13    2.94    0.64
   2  -3 -13    2.68    0.48
  -2  -3  13    2.49    0.49
  -2  -3  13    3.64    0.58
  -2   3  11    1.38    0.42
  -2   3  11    0.97    0.40
  -2   3  11    2.47    0.49
   2   3 -11    0.50    0.42
  -2   3  11    2.10    0.49
   2   3 -11    0.91    0.36
   2   3 -11    1.14    0.36
  -2  -3  11    0.78    0.36
  -2  -3  11    0.73    0.46
   2  -3 -11    2.30    0.63
  -2  -3  11    0.59    0.33
   2  -3 -11    1.38    0.50
   2  -3 -11    1.48    0.37
  -2  -3  11    0.68    0.41
   2  -3 -11    1.21    0.36
  -2   3   9    5.96    0.69
  -2   3   9    6.50    0.75
  -2   3   9    5.61    0.69
   2   3  -9    5.92    0.72
  -2   3   9    6.81    1.11
   2   3  -9    5.43    0.64
   2   3  -9    6.40    0.73
   2  -3  -9    5.28    0.79
   2  -3  -9    6.57    0.67
  -2  -3   9    6.00    0.76
   2  -3  -9    6.45    0.72
  -2  -3   9    7.30    0.79
  -2  -3   9    5.09    0.65
  -2  -3   9    6.66    0.72
   2  -3  -9    6.40    0.76
  -2   3   7   16.94    1.58
  -2   3   7   18.08    1.55
   2   3  -7   19.06    1.53
  -2   3   7   20.83    1.56
   2   3  -7   20.14    1.49
   2   3  -7   17.07    1.57
   2   3  -7   18.99    1.53
   2   3  -7   15.46    1.49
  -2   3   7   12.78    1.62
   2  -3  -7   17.19    1.55
  -2  -3   7   16.29    1.50
   2  -3  -7   16.62    1.58
   2  -3  -7   15.91    1.66
  -2  -3   7   17.59    1.52
   2  -3  -7   14.90    1.52
  -2  -3   7   16.28    1.60
   2  -3  -7   18.68    1.52
  -2  -3   7   17.33    1.53
  -2  -3   7   17.67    1.55
  -2  -3   7   15.00    1.49
  -2  -3   7   19.06    1.50
  -2  -3   7   19.48    1.56
   2   3  -5    7.83    0.81
  -2   3   5    9.24    0.88
   2   3  -5    9.08    0.85
   2   3  -5    8.08    0.89
   2   3  -5    8.67    0.91
  -2   3   5    9.94    0.97
  -2   3   5    9.58    0.90
   2   3  -5    8.44    0.88
  -2   3   5    8.13    0.89
  -2   3   5   10.19    0.89
  -2   3   5    8.35    0.83
  -2   3   5    9.54    0.93
  -2  -3   5   10.47    0.91
   2  -3  -5    8.84    0.87
  -2  -3   5    8.92    0.82
  -2  -3   5   10.28    0.93
  -2  -3   5    8.12    0.85
   2  -3  -5    8.14    0.87
   2  -3  -5    8.27    0.92
   2  -3  -5   10.54    0.99
  -2  -3   5    8.45    0.91
  -2  -3   5    9.49    0.87
  -2  -3   5    9.07    0.83
   2  -3  -5   10.38    0.84
   2   3  -3  254.38   19.78
   2   3  -3  253.26   19.78
  -2   3   3  257.40   19.78
   2   3  -3  252.13   19.78
  -2   3   3  227.81   19.79
  -2   3   3  266.35   19.80
  -2   3   3  241.89   19.76
  -2   3   3  236.46   19.79
   2   3  -3  247.24   19.79
  -2   3   3  238.70   19.79
   2   3  -3  261.53   19.79
   2   3  -3  258.07   19.78
  -2   3   3  248.28   19.79
  -2   3   3  242.79   19.79
   2  -3  -3  239.69   19.80
  -2  -3   3  253.86   19.78
   2  -3  -3  267.62   19.80
   2  -3  -3  248.31   19.79
   2  -3  -3  251.68   19.79
  -2  -3   3  255.62   19.78
   2  -3  -3  237.62   19.79
   2  -3  -3  254.68   19.79
  -2  -3   3  262.67   19.78
   2  -3  -3  248.12   19.77
   2  -3  -3  262.50   19.78
   2  -3  -3  234.27   19.79
  -2  -3   3  238.54   19.79
  -2  -3   3  252.98   19.79
  -2  -3   3  248.94   19.79
  -2  -3   3  255.34   19.79
  -2  -3   3  245.57   19.77
   2   3  -1  143.75   11.43
  -2   3   1  142.71   11.42
   2   3  -1  151.22   11.43
  -2   3   1  149.24   11.44
  -2   3   1  150.08   11.42
  -2   3   1  139.98   11.41
   2   3  -1  142.47   11.41
   2   3  -1  148.55   11.43
   2   3  -1  147.37   11.41
   2   3  -1  138.50   11.41
   2   3  -1  144.65   11.41
  -2   3   1  140.17   11.41
  -2   3   1  137.41   11.40
   2   3  -1  150.57   11.41
  -2   3   1  143.91   11.41
  -2   3   1  140.52   11.44
   2  -3  -1  145.36   11.40
  -2  -3   1  143.12   11.40
  -2  -3   1  150.04   11.41
  -2  -3   1  146.11   11.41
   2  -3  -1  136.81   11.42
  -2  -3   1  145.24   11.41
   2  -3  -1  132.62   11.42
  -2  -3   1  142.92   11.42
  -2  -3   1  151.96   11.41
   2  -3  -1  131.96   11.42
  -2  -3   1  154.43   11.43
  -2  -3   1  142.50   11.43
   2  -3  -1  142.10   11.41
   2   3   1  112.25   10.79
   2   3   1  138.56   10.74
   2   3   1  137.00   10.72
   2   3   1  141.84   10.73
  -2   3  -1  149.32   10.72
  -2   3  -1  137.93   10.73
   2   3   1  119.58   10.73
  -2   3  -1  136.82   10.72
   2   3   1  135.67   10.74
  -2   3  -1  139.43   10.72
   2   3   1  130.24   10.73
   2   3   1  138.69   10.73
  -2   3  -1  140.44   10.72
   2   3   1  122.56   10.72
   2  -3   1  138.68   10.73
  -2  -3  -1  123.95   10.72
  -2  -3  -1  136.78   10.73
   2  -3   1  143.08   10.74
  -2  -3  -1  135.79   10.73
   2  -3   1  138.18   10.72
   2  -3   1  137.34   10.74
  -2  -3  -1  129.32   10.73
  -2  -3  -1  139.54   10.75
  -2  -3  -1  140.38   10.73
  -2  -3  -1  136.25   10.74
   2  -3   1  134.30   10.73
  -2  -3  -1  139.85   10.73
  -2   3  -3  245.26   18.43
   2   3   3  222.47   18.44
   2   3   3  244.20   18.44
   2   3   3  242.56   18.44
   2   3   3  246.49   18.43
   2   3   3  241.10   18.45
   2   3   3  209.91   18.43
  -2   3  -3  237.59   18.42
   2   3   3  240.53   18.45
  -2   3  -3  224.83   18.41
   2   3   3  224.56   18.45
   2   3   3  234.17   18.45
  -2  -3  -3  238.07   18.45
  -2  -3  -3  223.60   18.43
   2  -3   3  234.13   18.42
  -2  -3  -3  225.94   18.44
  -2  -3  -3  225.27   18.42
   2  -3   3  246.31   18.43
   2  -3   3  222.33   18.42
  -2  -3  -3  224.26   18.45
  -2  -3  -3  228.72   18.45
  -2  -3  -3  223.93   18.43
  -2  -3  -3  248.43   18.45
   2   3   5    9.15    0.91
   2   3   5    9.87    0.96
  -2   3  -5    8.81    0.81
  -2   3  -5    8.67    1.03
   2   3   5    8.08    0.92
   2   3   5    8.77    0.86
   2   3   5    8.00    0.89
  -2  -3  -5   10.68    0.97
   2  -3   5    9.97    0.86
  -2  -3  -5   11.35    1.02
  -2  -3  -5   10.37    0.93
  -2  -3  -5    9.77    0.92
  -2  -3  -5    7.45    0.87
  -2  -3  -5   11.37    0.90
   2  -3   5    9.74    0.83
   2  -3   5    8.67    1.01
   2   3   7   15.49    1.49
   2   3   7   18.91    1.53
   2   3   7   17.75    1.52
  -2   3  -7   16.84    1.56
   2   3   7   17.84    1.58
  -2   3  -7   17.62    1.57
  -2  -3  -7   15.16    1.61
  -2  -3  -7   14.34    1.66
  -2  -3  -7   18.28    1.57
   2  -3   7   19.48    1.47
   2  -3   7   17.07    1.53
  -2  -3  -7   16.89    1.54
   2   3   9    5.01    0.64
  -2   3  -9    7.08    0.78
   2   3   9    4.96    0.69
  -2   3  -9    6.32    0.72
   2   3   9    5.99    0.70
   2   3   9    5.97    0.72
   2  -3   9    7.14    0.73
   2  -3   9    5.13    0.63
  -2  -3  -9    6.84    0.82
  -2  -3  -9    6.56    0.83
  -2  -3  -9    5.92    0.71
   2   3  11    2.11    0.58
   2   3  11    0.75    0.36
   2   3  11    0.60    0.38
  -2   3 -11    0.90    0.50
   2   3  11    1.41    0.49
   2  -3  11    0.64    0.32
  -2  -3 -11    2.65    0.63
   2  -3  11    0.73    0.42
  -2  -3 -11    1.52    0.51
  -2  -3 -11    2.09    0.51
  -2   3 -13    2.35    0.69
   2   3  13    2.98    0.63
  -2   3 -13    3.61    0.69
   2   3  13    3.52    0.62
   2   3  13    2.64    0.47
   2   3  13    2.91    0.52
   2   3  13    2.73    0.61
  -2  -3 -13    3.71    0.66
  -2  -3 -13    4.06    0.76
  -2  -3 -13    3.62    0.77
   2  -3  13    2.52    0.57
   2  -3  13    3.02    0.45
   2  -3  13    2.17    0.66
   2   3  15    3.61    0.68
   2   3  15    2.29    0.58
  -2   3 -15    2.39    0.70
   2   3  15    1.90    0.57
  -2   3 -15    1.61    0.71
   2   3  15    2.38    0.48
   2   3  15    1.75    0.50
  -2  -3 -15    2.72    0.79
   2  -3  15    2.23    0.60
  -2  -3 -15    1.48    0.60
   2   3  17   -0.34    0.76
  -2   3 -17    0.50    0.70
   2   3  17    0.46    0.42
   2   3  17    0.39    0.55
   2  -3  17    0.47    0.57
  -2  -3 -17    0.35    0.76
   2   4 -16    0.58    0.44
  -2   4  16    0.32    0.46
  -2   4  16    0.09    0.45
  -2   4  16    0.83    0.48
   2   4 -16    0.91    0.55
   2   4 -16    0.52    0.46
  -2   4  16    0.50    0.58
  -2  -4  16    1.48    0.46
   2  -4 -16    0.72    0.42
  -2  -4  16    0.13    0.39
   2  -4 -16   -0.09    0.53
  -2  -4  16    0.82    0.54
   2  -4 -16    0.21    0.70
  -2  -4  16    0.83    0.56
   2  -4 -16    0.22    0.53
   2   4 -14    2.19    0.51
  -2   4  14    3.57    0.64
  -2   4  14    3.98    0.72
   2   4 -14    3.11    0.64
   2   4 -14    2.24    0.50
  -2   4  14    4.03    0.67
  -2   4  14    2.90    0.57
  -2   4  14    2.54    0.56
  -2  -4  14    2.61    0.61
   2  -4 -14    3.07    0.82
  -2  -4  14    3.40    0.60
   2  -4 -14    2.78    0.51
  -2  -4  14    1.64    0.48
  -2  -4  14    3.41    0.67
   2  -4 -14    3.24    0.51
   2  -4 -14    2.82    0.67
   2   4 -12   19.19    1.60
  -2   4  12   16.70    1.63
  -2   4  12   18.91    1.63
   2   4 -12   15.90    1.64
  -2   4  12   16.20    1.71
  -2   4  12   19.96    1.68
   2   4 -12   16.45    1.59
  -2  -4  12   16.19    1.55
  -2  -4  12   16.59    1.59
   2  -4 -12   16.84    1.59
  -2  -4  12   18.26    1.66
   2  -4 -12   19.00    1.71
  -2  -4  12   19.92    1.75
   2  -4 -12   15.12    1.56
   2  -4 -12   18.89    1.80
  -2   4  10    8.08    0.87
   2   4 -10    6.44    0.73
   2   4 -10    4.67    0.70
  -2   4  10    7.10    0.80
  -2   4  10    8.80    0.87
   2   4 -10    5.86    0.78
  -2  -4  10    7.72    0.88
   2  -4 -10    8.79    0.91
   2  -4 -10    6.67    0.75
   2  -4 -10    8.14    0.95
  -2  -4  10    6.81    0.85
  -2  -4  10    5.70    0.73
  -2  -4  10    6.46    0.73
   2  -4 -10    7.01    0.73
  -2   4   8   56.02    4.47
   2   4  -8   52.26    4.45
   2   4  -8   54.69    4.43
  -2   4   8   57.29    4.46
   2   4  -8   55.07    4.43
  -2   4   8   56.25    4.46
   2   4  -8   51.96    4.42
   2  -4  -8   56.52    4.43
  -2  -4   8   52.70    4.47
  -2  -4   8   54.77    4.46
   2  -4  -8   56.12    4.48
   2  -4  -8   53.81    4.43
  -2  -4   8   54.20    4.42
   2  -4  -8   57.84    4.52
  -2  -4   8   54.77    4.43
  -2   4   6   74.83    5.36
   2   4  -6   57.91    5.32
   2   4  -6   66.56    5.36
   2   4  -6   66.89    5.34
  -2   4   6   64.55    5.36
  -2   4   6   57.50    5.36
  -2   4   6   69.34    5.36
   2   4  -6   71.52    5.33
   2   4  -6   65.02    5.35
   2   4  -6   67.02    5.34
  -2  -4   6   70.48    5.37
  -2  -4   6   64.03    5.33
  -2  -4   6   67.85    5.34
  -2  -4   6   60.66    5.33
  -2  -4   6   67.88    5.37
   2  -4  -6   67.37    5.37
  -2  -4   6   62.25    5.33
   2  -4  -6   68.93    5.37
   2  -4  -6   71.14    5.34
  -2  -4   6   61.33    5.32
  -2  -4   6   63.77    5.36
   2  -4  -6   75.87    5.34
  -2  -4   6   66.60    5.34
   2  -4  -6   69.27    5.39
   2   4  -4  280.84   22.16
  -2   4   4  270.52   22.18
  -2   4   4  281.10   22.18
  -2   4   4  290.99   22.16
   2   4  -4  281.37   22.16
   2   4  -4  279.70   22.15
  -2   4   4  265.84   22.18
  -2   4   4  284.80   22.17
  -2   4   4  286.70   22.19
   2   4  -4  280.19   22.18
  -2   4   4  284.54   22.18
  -2   4   4  268.24   22.15
   2  -4  -4  276.34   22.17
   2  -4  -4  293.04   22.16
  -2  -4   4  279.04   22.16
  -2  -4   4  265.66   22.16
  -2  -4   4  275.78   22.18
   2  -4  -4  295.48   22.21
   2  -4  -4  270.77   22.18
   2  -4  -4  282.06   22.19
   2  -4  -4  271.79   22.18
  -2  -4   4  294.09   22.15
  -2  -4   4  285.10   22.16
   2  -4  -4  264.84   22.18
   2  -4  -4  288.13   22.15
  -2   4   2  314.56   24.27
  -2   4   2  292.70   24.29
  -2   4   2  286.22   24.28
  -2   4   2  311.00   24.29
  -2   4   2  311.31   24.28
   2   4  -2  302.31   24.27
  -2   4   2  303.00   24.27
  -2   4   2  296.86   24.29
   2   4  -2  306.95   24.28
   2   4  -2  320.98   24.28
   2   4  -2  324.43   24.29
  -2   4   2  306.99   24.30
  -2   4   2  287.55   24.29
   2   4  -2  328.77   24.28
   2   4  -2  301.89   24.26
   2   4  -2  306.47   24.29
  -2  -4   2  323.42   24.29
  -2  -4   2  307.53   24.30
   2  -4  -2  314.78   24.27
  -2  -4   2  317.12   24.28
  -2  -4   2  312.10   24.29
   2  -4  -2  311.52   24.29
  -2  -4   2  318.36   24.28
   2  -4  -2  302.42   24.29
   2  -4  -2  291.35   24.29
   2  -4  -2  289.88   24.29
  -2  -4   2  317.21   24.28
   2  -4  -2  301.64   24.29
   2  -4  -2  295.21   24.28
  -2  -4   2  319.45   24.27
   2  -4  -2  307.96   24.29
  -2  -4   2  284.21   24.27
   2  -4  -2  308.81   24.28
   2   4   0  166.49   12.75
  -2   4   0  162.53   12.76
  -2   4   0  163.27   12.77
  -2   4   0  158.61   12.74
   2   4   0  160.97   12.75
   2   4   0  161.10   12.76
   2   4   0  150.96   12.75
   2   4   0  157.49   12.75
  -2   4   0  156.17   12.74
  -2   4   0  160.00   12.74
  -2   4   0  167.03   12.76
   2   4   0  156.16   12.76
  -2   4   0  158.40   12.74
   2   4   0  153.98   12.75
  -2   4   0  159.72   12.74
   2  -4   0  156.94   12.74
  -2  -4   0  165.89   12.74
   2  -4   0  161.61   12.77
   2  -4   0  162.61   12.76
  -2  -4   0  158.82   12.76
  -2  -4   0  164.61   12.75
   2  -4   0  162.84   12.74
  -2  -4   0  156.64   12.75
  -2  -4   0  165.09   12.76
  -2  -4   0  153.60   12.75
   2  -4   0  160.29   12.75
  -2  -4   0  165.04   12.75
  -2  -4   0  163.84   12.76
   2  -4   0  163.86   12.76
  -2  -4   0  154.74   12.75
   2  -4   0  174.33   12.75
   2  -4   0  164.17   12.75
  -2  -4   0  161.68   12.77
   2   4   2  303.27   23.61
   2   4   2  271.70   23.59
  -2   4  -2  304.87   23.62
   2   4   2  299.98   23.62
   2   4   2  287.26   23.61
   2   4   2  307.55   23.61
   2   4   2  298.36   23.61
   2   4   2  302.50   23.61
   2   4   2  265.54   23.61
  -2   4  -2  304.90   23.59
  -2   4  -2  322.82   23.59
   2   4   2  295.93   23.61
  -2   4  -2  291.92   23.59
   2  -4   2  304.46   23.62
  -2  -4  -2  316.35   23.61
  -2  -4  -2  312.93   23.61
  -2  -4  -2  275.05   23.61
   2  -4   2  294.07   23.59
  -2  -4  -2  299.30   23.61
   2  -4   2  298.27   23.60
  -2  -4  -2  290.91   23.61
  -2  -4  -2  300.48   23.60
   2  -4   2  290.88   23.60
  -2  -4  -2  290.34   23.61
  -2  -4  -2  314.81   23.61
  -2  -4  -2  284.54   23.61
  -2  -4  -2  290.52   23.62
   2  -4   2  326.87   23.60
   2  -4   2  303.36   23.60
   2   4   4  273.64   21.46
   2   4   4  262.50   21.44
   2   4   4  270.26   21.45
   2   4   4  265.54   21.43
   2   4   4  268.49   21.45
   2   4   4  270.15   21.41
  -2   4  -4  278.11   21.42
   2   4   4  266.01   21.43
  -2   4  -4  260.99   21.41
   2   4   4  266.62   21.44
  -2   4  -4  271.69   21.41
   2   4   4  274.96   21.44
   2  -4   4  266.11   21.42
  -2  -4  -4  267.40   21.42
   2  -4   4  268.89   21.41
  -2  -4  -4  270.48   21.45
  -2  -4  -4  284.18   21.45
  -2  -4  -4  258.30   21.45
   2  -4   4  291.38   21.42
  -2  -4  -4  264.40   21.44
  -2  -4  -4  286.60   21.45
  -2  -4  -4  266.66   21.43
  -2   4  -6   67.72    5.54
  -2   4  -6   67.03    5.54
   2   4   6   67.00    5.53
  -2   4  -6   72.30    5.51
   2   4   6   69.87    5.57
  -2   4  -6   65.29    5.51
  -2  -4  -6   65.33    5.57
  -2  -4  -6   78.60    5.55
   2  -4   6   69.73    5.55
   2  -4   6   70.39    5.52
   2  -4   6   64.28    5.57
   2  -4   6   66.37    5.51
  -2  -4  -6   63.61    5.53
  -2  -4  -6   72.75    5.57
  -2  -4  -6   66.44    5.58
   2  -4   6   73.74    5.54
  -2  -4  -6   73.77    5.60
   2   4   8   48.00    4.34
   2   4   8   55.69    4.36
  -2   4  -8   55.00    4.39
  -2   4  -8   53.36    4.38
   2   4   8   55.66    4.40
   2   4   8   55.31    4.39
  -2  -4  -8   54.78    4.38
   2  -4   8   53.12    4.33
  -2  -4  -8   54.45    4.42
   2  -4   8   54.65    4.36
  -2  -4  -8   53.10    4.41
  -2  -4  -8   53.89    4.32
   2   4  10    6.54    0.78
   2   4  10    5.59    0.77
   2   4  10    9.98    0.89
   2   4  10    7.14    0.84
  -2   4 -10    6.53    0.81
  -2   4 -10    8.03    0.90
  -2  -4 -10    7.34    0.93
   2  -4  10    7.22    0.90
   2  -4  10    7.30    0.78
  -2  -4 -10    6.92    0.89
  -2  -4 -10    6.64    0.85
   2   4  12   18.12    1.69
  -2   4 -12   17.96    1.79
  -2   4 -12   20.01    1.85
   2   4  12   18.56    1.75
   2   4  12   21.75    1.79
   2  -4  12   18.21    1.65
  -2  -4 -12   17.77    1.77
  -2  -4 -12   16.64    1.86
   2  -4  12   19.61    1.77
  -2  -4 -12   17.75    1.88
  -2   4 -14    3.26    0.79
   2   4  14    3.16    0.71
   2   4  14    3.58    0.55
  -2   4 -14    3.60    0.75
   2   4  14    3.71    0.69
   2   4  14    4.21    0.64
   2   4  14    4.67    0.74
   2  -4  14    3.37    0.65
  -2  -4 -14    3.48    0.85
  -2  -4 -14    3.44    0.72
   2   4  16    0.52    0.43
  -2   4 -16   -0.03    0.63
   2   4  16    0.78    0.43
   2   4  16    0.53    0.55
   2   4  16    0.36    0.49
  -2  -4 -16    1.11    0.57
  -2  -4 -16    0.81    0.72
   2  -4  16    0.52    0.57
  -2   5  17    0.12    0.55
   2   5 -17    1.17    0.62
  -2   5  17    0.91    0.52
  -2   5  17    0.69    0.55
  -2   5  17    0.84    0.63
   2  -5 -17    0.78    0.66
  -2  -5  17    0.39    0.47
   2  -5 -17    0.67    0.75
   2  -5 -17   -0.19    0.71
  -2  -5  17    0.31    0.57
  -2  -5  17    0.70    0.59
   2   5 -15    0.65    0.46
   2   5 -15    0.83    0.52
  -2   5  15    1.43    0.53
  -2   5  15    1.97    0.88
  -2   5  15    1.39    0.47
   2  -5 -15    1.38    0.45
   2  -5 -15    0.77    0.75
   2  -5 -15    1.19    0.66
  -2  -5  15    1.39    0.53
  -2  -5  15    0.87    0.48
  -2  -5  15    1.14    0.44
  -2  -5  15    1.40    0.58
  -2   5  13    2.36    0.57
  -2   5  13    1.24    0.53
  -2   5  13    1.59    0.56
   2   5 -13    1.15    0.45
   2   5 -13    1.86    0.44
  -2   5  13    1.80    0.50
   2  -5 -13    1.41    0.42
  -2  -5  13    1.85    0.56
   2  -5 -13    1.46    0.41
  -2  -5  13    1.00    0.42
   2  -5 -13    3.36    0.67
  -2  -5  13    1.06    0.63
  -2  -5  13    1.31    0.39
   2   5 -11   11.02    1.14
  -2   5  11   10.79    1.22
   2   5 -11   12.49    1.22
   2   5 -11   10.59    1.17
  -2   5  11   11.37    1.21
  -2   5  11   11.33    1.23
   2  -5 -11   11.53    1.36
   2  -5 -11   12.39    1.30
  -2  -5  11    9.72    1.08
   2  -5 -11   12.05    1.14
  -2  -5  11   10.78    1.15
   2  -5 -11   12.38    1.17
  -2  -5  11   12.94    1.21
  -2  -5  11   12.90    1.28
   2   5  -9    0.99    0.34
  -2   5   9    1.82    0.46
  -2   5   9    1.38    0.48
   2   5  -9    1.80    0.41
   2   5  -9    1.62    0.35
  -2   5   9    2.68    0.45
   2   5  -9    1.01    0.29
  -2  -5   9    1.30    0.39
  -2  -5   9    1.99    0.37
  -2  -5   9    0.49    0.26
  -2  -5   9    1.40    0.41
   2  -5  -9    1.03    0.49
   2  -5  -9    1.36    0.33
   2  -5  -9    1.93    0.37
  -2   5   7   26.38    2.41
  -2   5   7   32.76    2.42
   2   5  -7   27.33    2.37
   2   5  -7   29.17    2.38
   2   5  -7   28.14    2.40
  -2   5   7   29.72    2.40
   2   5  -7   27.78    2.36
  -2   5   7   22.82    2.40
   2  -5  -7   33.18    2.37
  -2  -5   7   28.15    2.42
  -2  -5   7   28.17    2.37
   2  -5  -7   30.21    2.47
   2  -5  -7   26.69    2.42
   2  -5  -7   30.00    2.37
  -2  -5   7   30.18    2.40
  -2  -5   7   26.86    2.36
  -2   5   5   11.47    1.35
   2   5  -5   15.81    1.34
  -2   5   5   16.49    1.39
   2   5  -5   15.04    1.36
  -2   5   5   16.05    1.38
   2   5  -5   14.44    1.28
   2   5  -5   13.80    1.43
  -2   5   5   16.10    1.32
   2   5  -5   14.97    1.36
  -2   5   5   16.08    1.36
  -2   5   5   13.67    1.37
  -2   5   5   15.42    1.39
   2   5  -5   16.59    1.35
   2   5  -5   13.82    1.32
  -2  -5   5   15.69    1.36
  -2  -5   5   13.53    1.35
  -2  -5   5   15.01    1.32
  -2  -5   5   17.10    1.39
  -2  -5   5   14.67    1.34
  -2  -5   5   16.26    1.39
  -2  -5   5   16.38    1.30
   2  -5  -5   15.03    1.37
   2  -5  -5   16.27    1.40
   2  -5  -5   16.31    1.39
   2  -5  -5   14.35    1.42
   2  -5  -5   16.27    1.33
  -2  -5   5   14.97    1.34
   2  -5  -5   15.92    1.37
   2  -5  -5   16.48    1.42
  -2   5   3   55.27    4.29
  -2   5   3   50.03    4.28
  -2   5   3   50.87    4.25
   2   5  -3   55.82    4.26
  -2   5   3   53.42    4.29
  -2   5   3   51.32    4.28
  -2   5   3   54.70    4.28
  -2   5   3   49.54    4.29
  -2   5   3   54.33    4.25
  -2   5   3   52.90    4.28
  -2   5   3   54.89    4.27
   2   5  -3   53.67    4.24
   2  -5  -3   48.73    4.28
   2  -5  -3   52.62    4.26
   2  -5  -3   50.82    4.30
  -2  -5   3   53.71    4.29
   2  -5  -3   50.84    4.28
   2  -5  -3   50.47    4.27
  -2  -5   3   56.90    4.25
   2  -5  -3   54.78    4.25
  -2  -5   3   51.56    4.25
  -2  -5   3   52.90    4.26
   2  -5  -3   55.44    4.29
  -2  -5   3   57.06    4.32
  -2  -5   3   57.13    4.27
   2  -5  -3   48.18    4.41
   2  -5  -3   53.46    4.28
  -2   5   1  420.74   33.16
   2   5  -1  412.10   33.15
  -2   5   1  415.78   33.14
   2   5  -1  426.63   33.14
   2   5  -1  429.32   33.14
  -2   5   1  441.80   33.16
   2   5  -1  407.02   33.14
  -2   5   1  408.23   33.15
   2   5  -1  410.74   33.14
   2   5  -1  407.87   33.14
   2   5  -1  431.88   33.14
  -2   5   1  406.58   33.14
  -2   5   1  428.75   33.15
   2   5  -1  413.59   33.16
  -2   5   1  420.47   33.15
  -2  -5   1  428.20   33.14
   2  -5  -1  411.63   33.16
  -2  -5   1  408.52   33.14
   2  -5  -1  421.26   33.15
  -2  -5   1  428.66   33.15
   2  -5  -1  429.53   33.16
  -2  -5   1  404.15   33.14
  -2  -5   1  433.13   33.14
   2  -5  -1  420.56   33.14
   2  -5  -1  438.41   33.15
   2  -5  -1  417.83   33.13
   2  -5  -1  419.92   33.15
   2  -5  -1  419.87   33.14
  -2  -5   1  421.06   33.16
   2  -5  -1  403.38   33.15
  -2  -5   1  436.55   33.15
  -2  -5   1  383.59   33.14
  -2   5  -1  427.26   32.61
   2   5   1  417.54   32.63
   2   5   1  355.18   32.63
  -2   5  -1  413.46   32.62
  -2   5  -1  414.80   32.62
   2   5   1  417.63   32.64
  -2   5  -1  426.42   32.64
  -2   5  -1  435.01   32.61
  -2   5  -1  415.93   32.64
   2   5   1  403.20   32.63
   2   5   1  400.56   32.62
  -2   5  -1  417.49   32.61
   2   5   1  409.38   32.63
  -2   5  -1  414.74   32.62
   2   5   1  397.53   32.62
  -2   5  -1  437.30   32.62
   2   5   1  404.28   32.63
   2   5   1  421.48   32.62
   2   5   1  398.50   32.63
  -2  -5  -1  399.38   32.64
   2  -5   1  440.33   32.61
   2  -5   1  420.60   32.63
  -2  -5  -1  387.70   32.63
   2  -5   1  416.99   32.64
  -2  -5  -1  415.23   32.61
   2  -5   1  428.73   32.63
  -2  -5  -1  399.96   32.62
   2  -5   1  429.84   32.62
  -2  -5  -1  392.42   32.62
   2  -5   1  418.33   32.61
  -2  -5  -1  387.80   32.62
   2  -5   1  421.09   32.62
  -2  -5  -1  403.60   32.62
  -2  -5  -1  416.06   32.63
   2  -5   1  437.17   32.61
  -2  -5  -1  406.85   32.63
  -2  -5  -1  408.72   32.62
   2   5   3   46.90    4.12
   2   5   3   52.47    4.14
  -2   5  -3   52.74    4.10
  -2   5  -3   53.79    4.14
   2   5   3   50.26    4.13
   2   5   3   51.51    4.13
  -2   5  -3   56.24    4.10
   2   5   3   49.39    4.15
   2   5   3   44.77    4.25
   2   5   3   48.27    4.10
   2   5   3   51.01    4.14
   2   5   3   49.33    4.13
  -2   5  -3   50.94    4.11
  -2   5  -3   51.66    4.11
   2  -5   3   55.54    4.14
  -2  -5  -3   50.40    4.15
  -2  -5  -3   52.12    4.12
   2  -5   3   56.08    4.10
  -2  -5  -3   51.35    4.28
   2  -5   3   52.95    4.11
   2  -5   3   51.31    4.11
  -2  -5  -3   47.82    4.10
  -2  -5  -3   49.24    4.14
  -2  -5  -3   48.53    4.13
  -2  -5  -3   47.72    4.21
  -2  -5  -3   48.62    4.13
  -2  -5  -3   51.16    4.14
   2  -5   3   55.27    4.10
   2  -5   3   54.69    4.10
   2  -5   3   52.84    4.12
  -2   5  -5   14.97    1.31
  -2   5  -5   15.22    1.29
  -2   5  -5   16.02    1.29
  -2   5  -5   15.16    1.28
   2   5   5   14.80    1.38
   2   5   5   15.81    1.35
   2   5   5   13.74    1.34
   2   5   5   16.99    1.36
   2   5   5   15.18    1.33
   2  -5   5   15.79    1.30
   2  -5   5   15.75    1.30
  -2  -5  -5   14.68    1.28
   2  -5   5   16.52    1.28
  -2  -5  -5   14.36    1.40
  -2  -5  -5   14.40    1.36
   2  -5   5   15.15    1.31
  -2  -5  -5   15.29    1.36
  -2  -5  -5   12.83    1.26
  -2  -5  -5   15.22    1.37
  -2  -5  -5   12.12    1.34
   2   5   7   25.96    2.52
  -2   5  -7   36.06    2.51
  -2   5  -7   31.23    2.54
   2   5   7   32.13    2.59
  -2   5  -7   31.38    2.52
  -2   5  -7   26.37    2.49
   2  -5   7   26.07    2.52
   2  -5   7   31.97    2.51
  -2  -5  -7   30.57    2.57
  -2  -5  -7   31.70    2.50
   2  -5   7   33.23    2.53
   2  -5   7   29.20    2.55
  -2  -5  -7   34.73    2.60
   2  -5   7   25.56    2.48
  -2  -5  -7   36.14    2.63
  -2   5  -9    1.37    0.33
   2   5   9    1.92    0.42
   2   5   9    2.06    0.40
   2  -5   9    1.82    0.36
   2  -5   9    2.14    0.40
  -2  -5  -9    2.69    0.57
   2   5  11   12.47    1.24
  -2   5 -11   14.02    1.37
   2   5  11   10.37    1.28
   2   5  11   13.51    1.36
  -2  -5 -11   13.28    1.46
   2  -5  11   11.47    1.15
  -2  -5 -11   14.38    1.45
  -2  -5 -11   12.15    1.29
  -2  -5 -11   11.09    1.14
   2  -5  11   11.91    1.26
  -2   5 -13    1.09    0.59
   2   5  13    1.71    0.55
   2   5  13    1.86    0.62
   2   5  13    2.08    0.48
  -2   5 -13    1.70    0.57
  -2  -5 -13    1.99    0.62
   2  -5  13    1.37    0.42
   2  -5  13    1.15    0.49
   2   5  15    0.77    0.44
   2   5  15    0.37    0.49
   2   5  15    1.23    0.62
   2   5  15    0.36    0.54
   2   5  15    1.20    0.41
  -2   5 -15    2.64    0.76
   2  -5  15    0.72    0.38
  -2  -5 -15    1.10    0.76
   2  -5  15    2.00    0.54
  -2  -5 -15    0.77    0.56
   2   5  17    0.35    0.48
   2   5  17    0.84    0.59
  -2   5 -17    0.59    0.71
   2   5  17    0.87    0.54
   2   5  17   -0.33    0.58
   2  -5  17    0.24    0.48
  -2  -5 -17    0.83    1.03
  -2  -5 -17    0.71    0.64
   2   6 -16   -0.29    0.42
   2   6 -16    1.17    0.60
  -2   6  16    0.33    0.46
   2   6 -16    0.91    0.48
  -2   6  16    0.35    0.47
  -2   6  16    0.41    0.55
  -2   6  16    0.48    0.56
  -2   6  16    0.33    0.56
   2  -6 -16    0.54    0.59
  -2  -6  16    0.87    0.58
   2  -6 -16    1.05    0.42
   2  -6 -16    0.35    0.43
   2  -6 -16    0.51    0.71
  -2  -6  16    0.99    0.56
  -2   6  14    0.04    0.41
   2   6 -14    0.47    0.40
  -2   6  14   -0.42    0.43
   2   6 -14    0.94    0.52
  -2   6  14    0.30    0.50
  -2   6  14    0.46    0.50
   2   6 -14    0.97    0.49
   2  -6 -14    0.69    0.67
   2  -6 -14    0.26    0.38
  -2  -6  14    0.96    0.53
  -2  -6  14    0.87    0.52
   2  -6 -14    0.58    0.57
  -2  -6  14    0.06    0.36
   2   6 -12   10.10    1.15
  -2   6  12   12.33    1.21
  -2   6  12   12.01    1.22
  -2   6  12    9.52    1.17
   2   6 -12    8.14    1.09
  -2  -6  12    9.88    1.11
   2  -6 -12   12.01    1.10
   2  -6 -12   10.80    1.11
  -2  -6  12   10.17    1.29
   2  -6 -12   11.34    1.27
  -2  -6  12   11.78    1.28
   2  -6 -12   10.47    1.36
  -2   6  10   12.98    1.29
  -2   6  10   14.14    1.31
   2   6 -10   13.51    1.27
  -2   6  10   13.56    1.29
   2   6 -10   11.65    1.22
   2   6 -10   11.77    1.25
   2  -6 -10   14.37    1.42
  -2  -6  10   11.95    1.31
   2  -6 -10   14.88    1.34
  -2  -6  10   13.65    1.32
   2  -6 -10   12.91    1.23
  -2  -6  10   10.01    1.20
  -2   6   8   48.77    3.89
  -2   6   8   50.23    3.91
  -2   6   8   48.94    3.91
   2   6  -8   45.86    3.87
  -2   6   8   47.54    3.89
   2   6  -8   50.19    3.87
   2   6  -8   48.37    3.87
  -2  -6   8   46.89    3.86
   2  -6  -8   39.42    4.07
   2  -6  -8   49.47    3.86
   2  -6  -8   49.36    3.92
  -2  -6   8   45.14    3.85
  -2  -6   8   52.49    3.92
  -2  -6   8   46.51    3.90
   2  -6  -8   47.38    3.86
  -2  -6   8   42.10    3.94
  -2   6   6   62.18    4.87
   2   6  -6   56.82    4.81
   2   6  -6   62.17    4.82
  -2   6   6   62.00    4.85
   2   6  -6   62.19    4.84
  -2   6   6   63.15    4.86
  -2   6   6   62.77    4.86
  -2   6   6   59.90    4.80
   2  -6  -6   56.45    4.88
   2  -6  -6   58.91    4.83
  -2  -6   6   57.40    4.85
   2  -6  -6   58.95    4.87
   2  -6  -6   60.82    4.81
   2  -6  -6   60.75    4.82
  -2  -6   6   61.08    4.79
  -2  -6   6   59.57    4.81
   2  -6  -6   59.24    4.87
  -2  -6   6   60.00    4.85
  -2  -6   6   52.88    4.81
   2   6  -4   30.46    2.48
  -2   6   4   29.94    2.49
   2   6  -4   30.80    2.44
  -2   6   4   30.56    2.51
  -2   6   4   30.94    2.47
   2   6  -4   30.19    2.46
  -2   6   4   29.98    2.50
  -2   6   4   32.01    2.52
   2   6  -4   30.42    2.48
   2   6  -4   30.21    2.49
  -2   6   4   25.97    2.50
  -2   6   4   32.87    2.51
   2   6  -4   27.74    2.48
  -2   6   4   27.94    2.46
  -2   6   4   28.44    2.54
   2  -6  -4   28.85    2.51
   2  -6  -4   31.44    2.47
   2  -6  -4   28.10    2.53
  -2  -6   4   29.21    2.46
  -2  -6   4   33.19    2.52
  -2  -6   4   29.83    2.48
   2  -6  -4   33.47    2.51
  -2  -6   4   29.67    2.47
  -2  -6   4   28.16    2.51
   2  -6  -4   32.12    2.52
   2  -6  -4   30.58    2.47
  -2  -6   4   29.20    2.47
  -2  -6   4   31.95    2.45
   2  -6  -4   26.99    2.54
  -2  -6   4   29.83    2.50
   2  -6  -4   32.44    2.50
   2   6  -2   62.84    5.15
   2   6  -2   62.18    5.16
   2   6  -2   63.96    5.16
   2   6  -2   64.20    5.17
   2   6  -2   72.56    5.21
  -2   6   2   69.07    5.18
  -2   6   2   64.81    5.16
  -2   6   2   68.79    5.19
  -2   6   2   60.85    5.22
   2   6  -2   66.32    5.17
   2   6  -2   61.47    5.15
  -2   6   2   61.50    5.19
   2   6  -2   68.06    5.15
  -2   6   2   64.36    5.19
   2   6  -2   62.43    5.18
   2  -6  -2   62.15    5.20
  -2  -6   2   61.94    5.15
   2  -6  -2   52.58    5.25
   2  -6  -2   67.67    5.19
  -2  -6   2   65.67    5.20
   2  -6  -2   63.80    5.19
   2  -6  -2   67.86    5.18
  -2  -6   2   61.30    5.16
   2  -6  -2   66.15    5.16
  -2  -6   2   61.54    5.17
   2  -6  -2   64.29    5.20
   2  -6  -2   66.72    5.17
  -2  -6   2   67.00    5.18
   2  -6  -2   67.80    5.16
  -2  -6   2   63.90    5.17
   2  -6  -2   63.54    5.16
  -2  -6   2   66.39    5.16
  -2   6   0   79.40    6.13
   2   6   0   73.99    6.21
   2   6   0   73.78    6.14
   2   6   0   67.85    6.22
  -2   6   0   75.75    6.12
  -2   6   0   83.47    6.17
  -2   6   0   69.31    6.14
   2   6   0   73.33    6.15
   2   6   0   86.68    6.16
  -2   6   0   80.32    6.13
   2   6   0   68.17    6.20
   2   6   0   79.16    6.18
  -2  -6   0   89.15    6.21
   2  -6   0   73.68    6.15
   2  -6   0   69.63    6.18
   2  -6   0   79.89    6.13
   2  -6   0   80.52    6.13
   2  -6   0   79.52    6.16
  -2  -6   0   80.21    6.17
   2  -6   0   82.10    6.16
  -2  -6   0   75.30    6.14
  -2  -6   0   74.49    6.23
   2  -6   0   78.34    6.13
   2  -6   0   75.52    6.15
  -2  -6   0   69.20    6.18
  -2  -6   0   77.44    6.15
  -2   6  -2   64.98    5.13
   2   6   2   62.96    5.17
  -2   6  -2   63.80    5.14
  -2   6  -2   67.44    5.12
  -2   6  -2   66.86    5.14
   2   6   2   65.14    5.14
   2   6   2   63.38    5.16
   2   6   2   65.51    5.17
  -2   6  -2   65.81    5.16
   2   6   2   61.15    5.18
   2   6   2   61.31    5.16
   2   6   2   61.52    5.15
   2   6   2   63.19    5.17
  -2   6  -2   64.58    5.15
   2   6   2   65.10    5.15
   2  -6   2   67.42    5.13
  -2  -6  -2   54.39    5.22
  -2  -6  -2   66.54    5.17
  -2  -6  -2   65.97    5.17
   2  -6   2   65.35    5.39
   2  -6   2   68.16    5.13
  -2  -6  -2   58.64    5.14
  -2  -6  -2   63.41    5.18
  -2  -6  -2   65.41    5.17
   2  -6   2   67.23    5.14
  -2  -6  -2   64.77    5.16
  -2  -6  -2   62.93    5.17
   2  -6   2   67.49    5.15
   2  -6   2   64.90    5.16
  -2  -6  -2   64.00    5.15
   2  -6   2   63.54    5.14
   2   6   4   28.14    2.42
   2   6   4   29.63    2.42
  -2   6  -4   28.63    2.37
   2   6   4   32.35    2.46
   2   6   4   31.77    2.44
   2   6   4   28.46    2.38
   2   6   4   26.37    2.42
  -2   6  -4   28.37    2.42
   2   6   4   30.60    2.44
   2   6   4   27.89    2.43
   2   6   4   27.15    2.41
   2   6   4   29.66    2.42
  -2   6  -4   29.11    2.36
  -2   6  -4   28.56    2.37
  -2   6  -4   29.33    2.40
  -2   6  -4   30.54    2.47
   2  -6   4   29.53    2.36
   2  -6   4   31.03    2.46
   2  -6   4   29.54    2.42
  -2  -6  -4   26.97    2.48
  -2  -6  -4   28.05    2.42
  -2  -6  -4   29.87    2.43
  -2  -6  -4   30.23    2.43
  -2  -6  -4   29.21    2.44
  -2  -6  -4   28.59    2.43
   2  -6   4   32.74    2.37
  -2  -6  -4   27.21    2.39
   2  -6   4   28.68    2.40
  -2  -6  -4   25.79    2.38
  -2  -6  -4   31.10    2.44
  -2   6  -6   62.71    4.74
   2   6   6   60.69    4.75
  -2   6  -6   57.18    4.71
   2   6   6   58.74    4.75
  -2   6  -6   61.37    4.75
   2   6   6   59.65    4.77
   2   6   6   64.59    4.72
   2   6   6   56.83    4.74
  -2   6  -6   60.75    4.72
   2  -6   6   59.79    4.71
  -2  -6  -6   50.81    4.72
  -2  -6  -6   59.92    4.77
  -2  -6  -6   54.81    4.77
  -2  -6  -6   56.22    4.74
   2  -6   6   58.08    4.72
  -2  -6  -6   60.02    4.70
  -2  -6  -6   57.59    4.79
   2  -6   6   60.69    4.73
   2  -6   6   52.04    4.75
   2   6   8   50.40    3.93
   2   6   8   41.47    3.91
  -2   6  -8   47.44    3.83
  -2   6  -8   46.68    3.84
   2   6   8   50.68    3.93
  -2   6  -8   49.47    3.87
   2   6   8   51.06    3.89
  -2  -6  -8   49.51    3.84
   2  -6   8   47.77    3.86
   2  -6   8   46.83    3.85
  -2  -6  -8   43.39    3.86
  -2  -6  -8   42.86    3.82
   2  -6   8   49.42    3.83
  -2  -6  -8   48.80    3.91
  -2   6 -10   18.29    1.55
   2   6  10   13.98    1.51
   2   6  10   18.12    1.58
  -2   6 -10   16.32    1.51
  -2  -6 -10   16.79    1.64
  -2  -6 -10   14.53    1.40
   2  -6  10   16.51    1.50
  -2  -6 -10   15.15    1.52
  -2  -6 -10   15.87    1.58
   2  -6  10   14.86    1.41
   2   6  12   11.92    1.29
   2   6  12   13.74    1.37
  -2   6 -12   14.17    1.43
   2   6  12   13.64    1.42
  -2   6 -12   15.16    1.38
   2  -6  12   12.56    1.32
  -2  -6 -12   13.48    1.52
  -2  -6 -12   11.80    1.48
   2  -6  12    9.64    1.21
  -2  -6 -12   14.99    1.41
  -2   6 -14    0.53    0.60
   2   6  14    0.13    0.43
   2   6  14    0.34    0.48
   2   6  14    0.02    0.55
  -2   6 -14   -0.36    0.50
   2  -6  14    0.28    0.39
  -2  -6 -14    0.43    0.51
  -2  -6 -14    1.01    0.67
   2  -6  14   -0.21    0.42
   2   6  16    0.86    0.58
   2   6  16    1.06    0.64
  -2   6 -16    0.48    0.64
   2   6  16   -0.02    0.52
   2  -6  16    2.15    1.12
  -2  -6 -16    0.97    0.61
  -2  -6 -16    0.00    0.70
  -2   7  17    1.49    0.56
  -2   7  17    1.27    0.66
   2   7 -17    0.45    0.62
  -2   7  17    1.56    0.58
  -2   7  17    2.99    0.98
  -2   7  17    1.05    0.64
   2  -7 -17    1.53    0.52
   2  -7 -17    1.94    0.70
   2  -7 -17    1.64    0.89
  -2  -7  17    1.18    0.67
  -2  -7  17    1.46    0.65
  -2   7  15    1.19    0.63
  -2   7  15    0.41    0.53
   2   7 -15    0.54    0.48
   2   7 -15    0.91    0.45
  -2   7  15    0.86    0.57
  -2   7  15    0.56    0.48
  -2  -7  15    0.83    0.56
  -2  -7  15    0.50    0.56
  -2  -7  15    0.57    0.39
   2  -7 -15    0.59    0.57
   2  -7 -15    0.99    0.43
   2  -7 -15    1.35    0.71
   2  -7 -15    1.20    0.42
  -2   7  13   15.34    1.53
   2   7 -13   15.15    1.48
  -2   7  13   12.41    1.45
   2   7 -13   14.02    1.42
   2   7 -13   13.26    1.55
  -2   7  13   14.86    1.53
  -2  -7  13   14.09    1.48
   2  -7 -13   16.56    1.59
   2  -7 -13   12.47    1.38
   2  -7 -13   18.05    1.67
  -2  -7  13   13.60    1.54
  -2   7  11   42.24    3.82
   2   7 -11   45.63    3.79
   2   7 -11   45.07    3.78
  -2   7  11   46.90    3.83
  -2   7  11   49.16    3.86
   2   7 -11   47.16    3.80
  -2  -7  11   45.30    3.83
   2  -7 -11   46.85    3.78
   2  -7 -11   48.54    3.93
   2  -7 -11   43.74    3.77
  -2  -7  11   45.31    3.84
   2  -7 -11   49.37    3.87
  -2  -7  11   40.97    3.75
  -2   7   9    2.12    0.47
  -2   7   9    1.52    0.48
   2   7  -9    1.85    0.46
   2   7  -9    2.32    0.44
   2   7  -9    2.66    0.47
  -2   7   9    2.62    0.56
  -2   7   9    2.11    0.50
   2  -7  -9    2.93    0.55
   2  -7  -9    2.53    0.42
  -2  -7   9    3.05    0.64
  -2  -7   9    3.65    0.56
   2  -7  -9    1.98    0.56
  -2  -7   9    2.32    0.42
   2  -7  -9    2.75    0.41
   2   7  -7    5.05    0.57
  -2   7   7    5.08    0.67
  -2   7   7    4.01    0.63
  -2   7   7    4.39    0.53
  -2   7   7    4.97    0.61
   2   7  -7    5.63    0.60
  -2   7   7    5.18    0.65
  -2  -7   7    4.37    0.55
   2  -7  -7    4.57    0.65
   2  -7  -7    5.17    0.69
  -2  -7   7    5.89    0.66
   2  -7  -7    4.44    0.55
   2  -7  -7    5.17    0.69
  -2  -7   7    4.93    0.56
  -2   7   5   56.49    4.69
  -2   7   5   62.34    4.70
  -2   7   5   58.80    4.68
  -2   7   5   59.88    4.65
  -2   7   5   61.02    4.68
   2   7  -5   57.08    4.65
   2   7  -5   56.70    4.64
   2   7  -5   60.25    4.68
  -2   7   5   54.88    4.69
   2  -7  -5   61.29    4.65
   2  -7  -5   61.29    4.65
  -2  -7   5   55.47    4.69
  -2  -7   5   58.63    4.71
  -2  -7   5   60.13    4.70
   2  -7  -5   55.72    4.69
   2  -7  -5   50.32    4.76
   2  -7  -5   58.12    4.67
  -2  -7   5   53.48    4.64
  -2  -7   5   59.22    4.62
   2  -7  -5   55.94    4.72
   2  -7  -5   56.33    4.69
  -2  -7   5   54.63    4.64
   2   7  -3    1.35    0.28
   2   7  -3    1.05    0.31
  -2   7   3    1.24    0.33
  -2   7   3    0.90    0.33
   2   7  -3    2.03    0.35
   2   7  -3    1.48    0.30
  -2   7   3    1.44    0.33
  -2   7   3    0.89    0.36
  -2   7   3    0.89    0.30
   2   7  -3    0.99    0.22
   2   7  -3    1.87    0.34
  -2   7   3    0.54    0.35
  -2   7   3    1.36    0.34
   2   7  -3    1.29    0.32
  -2   7   3    1.49    0.60
  -2   7   3    1.16    0.34
   2  -7  -3    0.97    0.35
   2  -7  -3    1.18    0.34
   2  -7  -3    1.06    0.36
  -2  -7   3    0.94    0.30
   2  -7  -3    1.25    0.37
   2  -7  -3    1.16    0.41
  -2  -7   3    1.98    0.41
  -2  -7   3    1.37    0.29
  -2  -7   3    1.50    0.31
   2  -7  -3    1.46    0.29
   2  -7  -3    1.05    0.28
   2  -7  -3    1.16    0.30
  -2  -7   3    1.46    0.34
   2  -7  -3    1.37    0.31
   2  -7  -3    1.09    0.33
  -2  -7   3    0.89    0.27
  -2   7   1   24.56    1.99
   2   7  -1   22.38    1.96
   2   7  -1   23.78    1.96
  -2   7   1   24.83    1.98
   2   7  -1   22.33    1.95
   2   7  -1   22.99    1.95
  -2   7   1   24.71    1.96
   2   7  -1   23.75    1.95
  -2   7   1   24.01    1.95
  -2   7   1   23.91    1.98
   2   7  -1   22.75    1.95
   2   7  -1   22.05    1.97
  -2   7   1   24.71    1.95
   2   7  -1   23.13    1.97
  -2  -7   1   24.06    1.94
  -2  -7   1   21.63    1.96
   2  -7  -1   25.82    2.00
   2  -7  -1   24.34    1.94
   2  -7  -1   25.38    1.95
  -2  -7   1   24.73    1.99
  -2  -7   1   22.49    1.99
  -2  -7   1   23.32    1.96
   2  -7  -1   24.29    1.99
   2  -7  -1   24.11    1.98
   2  -7  -1   25.33    1.99
  -2  -7   1   19.61    1.93
  -2  -7   1   22.94    1.95
   2  -7  -1   18.86    1.98
   2   7   1   21.20    1.95
   2   7   1   22.34    1.93
  -2   7  -1   23.70    1.90
  -2   7  -1   23.46    1.95
  -2   7  -1   20.86    1.97
   2   7   1   23.60    1.97
   2   7   1   23.47    1.94
  -2   7  -1   22.22    1.90
   2   7   1   23.40    1.94
  -2   7  -1   22.80    1.94
   2   7   1   24.27    1.94
   2   7   1   23.65    1.90
   2   7   1   22.75    1.96
  -2   7  -1   23.53    1.90
  -2   7  -1   23.05    1.91
   2   7   1   23.31    1.95
   2   7   1   22.62    1.96
  -2   7  -1   22.92    1.94
  -2   7  -1   23.17    1.93
  -2  -7  -1   23.17    1.97
   2  -7   1   28.89    2.12
   2  -7   1   21.41    1.93
  -2  -7  -1   24.51    1.91
  -2  -7  -1   22.65    1.95
  -2  -7  -1   22.68    1.94
   2  -7   1   23.62    1.90
   2  -7   1   21.79    1.91
  -2  -7  -1   24.06    1.92
   2  -7   1   23.25    1.90
  -2  -7  -1   23.98    1.95
   2  -7   1   22.47    1.98
  -2  -7  -1   23.41    1.96
  -2  -7  -1   22.40    1.93
   2  -7   1   23.04    1.93
  -2  -7  -1   25.12    1.96
   2  -7   1   23.69    1.93
   2  -7   1   23.76    1.96
   2   7   3    1.81    0.35
  -2   7  -3    1.80    0.32
   2   7   3    1.41    0.33
   2   7   3    1.47    0.34
   2   7   3    2.08    0.41
   2   7   3    0.59    0.31
   2   7   3    1.37    0.29
  -2   7  -3    1.28    0.34
   2   7   3    2.49    0.36
   2   7   3    0.90    0.31
   2   7   3    1.53    0.36
   2   7   3    1.33    0.29
  -2   7  -3    1.86    0.37
   2   7   3    0.41    0.28
   2  -7   3    1.81    0.41
  -2  -7  -3    0.85    0.30
  -2  -7  -3    2.04    0.38
  -2  -7  -3    1.17    0.36
  -2  -7  -3    2.75    0.39
  -2  -7  -3    1.44    0.36
  -2  -7  -3    1.31    0.33
  -2  -7  -3    0.27    0.37
   2  -7   3    1.72    0.29
   2  -7   3    1.23    0.38
  -2  -7  -3    0.83    0.29
  -2  -7  -3    1.13    0.28
   2   7   5   59.92    4.84
   2   7   5   61.00    4.82
  -2   7  -5   60.39    4.76
   2   7   5   54.03    4.80
  -2   7  -5   63.13    4.82
   2   7   5   57.89    4.82
  -2   7  -5   58.23    4.78
   2   7   5   57.12    4.76
   2   7   5   62.80    4.79
  -2   7  -5   58.54    4.77
  -2   7  -5   59.41    4.88
  -2  -7  -5   60.27    4.83
  -2  -7  -5   57.57    4.77
  -2  -7  -5   56.53    4.78
   2  -7   5   59.99    4.80
  -2  -7  -5   60.56    4.82
   2  -7   5   60.66    4.81
  -2  -7  -5   59.57    4.83
   2  -7   5   60.12    4.78
  -2  -7  -5   59.61    4.83
   2   7   7    4.74    0.66
  -2   7  -7    7.29    0.68
  -2   7  -7    5.05    0.60
  -2   7  -7    5.24    0.67
   2   7   7    4.89    0.69
   2   7   7    4.11    0.65
  -2  -7  -7    5.17    0.58
   2  -7   7    5.60    0.63
  -2  -7  -7    4.76    0.57
  -2  -7  -7    4.85    0.66
  -2  -7  -7    5.16    0.71
   2  -7   7    5.23    0.62
  -2  -7  -7    5.48    0.70
  -2  -7  -7    7.08    0.76
   2  -7   7    6.04    0.69
   2  -7   7    6.25    0.69
  -2   7  -9    4.27    0.47
  -2   7  -9    2.52    0.46
  -2   7  -9    2.48    0.42
   2   7   9    3.44    0.59
   2   7   9    2.85    0.53
   2   7   9    3.56    0.59
   2   7   9    2.86    0.54
  -2  -7  -9    2.43    0.40
   2  -7   9    3.37    0.49
  -2  -7  -9    2.65    0.51
  -2  -7  -9    2.85    0.54
  -2  -7  -9    3.24    0.57
  -2  -7  -9    2.51    0.39
  -2  -7  -9    2.81    0.62
   2  -7   9    3.17    0.48
   2  -7   9    2.33    0.44
  -2   7 -11   43.84    3.48
   2   7  11   45.38    3.56
  -2   7 -11   39.33    3.55
   2   7  11   43.80    3.50
   2   7  11   38.60    3.47
  -2  -7 -11   41.13    3.57
  -2  -7 -11   36.64    3.46
  -2  -7 -11   37.85    3.57
   2  -7  11   40.75    3.50
   2  -7  11   43.29    3.43
  -2  -7 -11   46.34    3.54
  -2  -7 -11   41.35    3.40
  -2   7 -13   13.92    1.48
   2   7  13   13.20    1.39
  -2   7 -13   13.02    1.52
   2   7  13   16.51    1.59
   2   7  13   13.70    1.48
   2   7  13   12.01    1.47
  -2  -7 -13   12.89    1.65
   2  -7  13   12.51    1.31
   2  -7  13   14.05    1.44
  -2  -7 -13   13.03    1.29
  -2  -7 -13   14.29    1.49
   2   7  15    0.01    0.60
   2   7  15    0.85    0.55
   2   7  15    0.42    0.44
  -2   7 -15    0.43    0.67
  -2  -7 -15    0.57    0.58
   2  -7  15    1.06    0.54
   2  -7  15    1.01    0.46
  -2  -7 -15    1.35    0.76
   2   7  17    2.42    0.62
   2   7  17    1.56    0.69
   2  -7  17    1.23    0.66
  -2  -7 -17    1.12    0.85
  -2  -7 -17    1.52    0.69
  -2   8  16    0.86    0.58
  -2   8  16    1.34    0.64
  -2   8  16    0.40    0.56
   2   8 -16    0.14    0.51
   2  -8 -16    0.99    0.41
   2  -8 -16    0.43    0.44
  -2  -8  16    0.70    0.62
   2  -8 -16    0.05    0.59
   2  -8 -16    1.57    0.82
  -2  -8  16    0.36    0.56
   2   8 -14    1.07    0.43
  -2   8  14    1.35    0.60
   2   8 -14    1.23    0.50
  -2   8  14    1.47    0.52
  -2   8  14    0.71    0.53
  -2   8  14    0.47    0.52
   2  -8 -14    1.79    0.45
  -2  -8  14    0.88    0.56
   2  -8 -14    1.14    0.64
  -2  -8  14    0.41    0.54
   2  -8 -14    0.06    0.39
  -2  -8  14    0.23    0.38
   2  -8 -14    0.16    0.62
   2   8 -12    2.72    0.62
  -2   8  12    5.70    0.83
  -2   8  12    4.21    0.75
   2   8 -12    3.81    0.61
  -2   8  12    3.89    0.69
  -2  -8  12    4.00    0.73
   2  -8 -12    5.14    0.85
   2  -8 -12    4.78    0.62
   2  -8 -12    5.55    0.85
  -2  -8  12    3.80    0.73
  -2   8  10    0.97    0.43
  -2   8  10    1.79    0.57
  -2   8  10    0.95    0.41
   2   8 -10    1.16    0.45
  -2   8  10    2.70    0.66
   2   8 -10    2.21    0.41
   2  -8 -10    2.63    0.42
  -2  -8  10    0.89    0.38
  -2  -8  10    1.39    0.50
   2  -8 -10    1.50    0.39
   2  -8 -10    2.29    0.60
   2  -8 -10    1.37    0.54
  -2   8   8    2.61    0.49
   2   8  -8    3.17    0.50
  -2   8   8    2.52    0.48
   2   8  -8    2.62    0.45
  -2   8   8    2.60    0.41
  -2   8   8    2.03    0.49
  -2   8   8    1.85    0.51
  -2  -8   8    2.39    0.50
   2  -8  -8    2.73    0.54
   2  -8  -8    2.37    0.52
   2  -8  -8    3.51    0.44
   2  -8  -8    2.45    0.40
  -2  -8   8    2.41    0.41
   2  -8  -8    3.48    0.59
  -2  -8   8    3.57    0.55
  -2   8   6   12.00    1.18
  -2   8   6   16.22    1.28
  -2   8   6   12.15    1.15
  -2   8   6   13.31    1.21
  -2   8   6   14.62    1.25
   2   8  -6    9.82    1.13
   2   8  -6   12.00    1.18
  -2  -8   6   10.45    1.12
   2  -8  -6   13.35    1.27
  -2  -8   6   10.12    1.20
   2  -8  -6   13.35    1.23
  -2  -8   6   12.39    1.20
   2  -8  -6   14.02    1.26
   2  -8  -6   12.35    1.14
  -2   8   4   17.49    1.92
   2   8  -4   25.32    1.89
  -2   8   4   23.45    1.91
  -2   8   4   19.14    1.94
  -2   8   4   19.21    1.96
   2   8  -4   20.20    1.92
   2   8  -4   20.00    1.88
  -2   8   4   27.50    2.00
  -2   8   4   22.05    1.94
  -2  -8   4   25.94    1.90
  -2  -8   4   26.18    1.97
   2  -8  -4   22.49    1.95
   2  -8  -4   21.76    1.96
   2  -8  -4   20.61    1.94
  -2  -8   4   24.38    1.91
  -2  -8   4   26.04    1.96
   2  -8  -4   19.95    1.89
   2   8  -2    6.07    0.59
   2   8  -2    6.55    0.62
   2   8  -2    6.58    0.62
  -2   8   2    4.23    0.58
  -2   8   2    4.11    0.57
  -2   8   2    5.03    0.60
   2   8  -2    5.83    0.68
  -2   8   2    5.01    0.60
  -2   8   2    5.14    0.62
   2   8  -2    6.51    0.59
  -2   8   2    3.05    0.60
  -2   8   2    4.79    0.64
   2   8  -2    6.54    0.67
   2   8  -2    6.34    0.60
   2   8  -2    6.38    0.75
   2   8  -2    6.70    0.67
   2  -8  -2    3.96    0.61
  -2  -8   2    6.28    0.71
  -2  -8   2    6.44    0.62
   2  -8  -2    4.35    0.58
   2  -8  -2    5.37    0.56
  -2  -8   2    4.70    0.56
  -2  -8   2    6.80    0.65
  -2  -8   2    5.67    0.64
  -2  -8   2    5.63    0.66
   2  -8  -2    4.56    0.64
   2  -8  -2    4.41    0.61
  -2  -8   2    5.27    0.60
   2  -8  -2    3.88    0.60
  -2   8   0   40.64    3.25
  -2   8   0   41.27    3.26
   2   8   0   42.78    3.27
   2   8   0   43.27    3.29
   2   8   0   41.49    3.29
  -2   8   0   39.67    3.31
   2   8   0   40.66    3.30
   2   8   0   37.84    3.29
   2   8   0   40.27    3.28
   2   8   0   41.08    3.28
  -2   8   0   41.00    3.30
   2   8   0   41.39    3.26
  -2   8   0   40.36    3.27
   2   8   0   39.09    3.26
  -2   8   0   41.06    3.28
  -2   8   0   37.89    3.26
   2   8   0   38.73    3.26
   2  -8   0   38.99    3.26
  -2  -8   0   43.51    3.29
   2  -8   0   38.81    3.31
  -2  -8   0   41.11    3.31
  -2  -8   0   38.35    3.28
   2  -8   0   42.84    3.26
  -2  -8   0   36.46    3.26
  -2  -8   0   40.36    3.28
   2  -8   0   39.98    3.28
   2  -8   0   39.85    3.29
  -2  -8   0   40.97    3.28
   2  -8   0   41.01    3.30
  -2  -8   0   38.97    3.26
  -2  -8   0   35.58    3.26
   2  -8   0   40.65    3.27
  -2   8  -2    5.89    0.69
   2   8   2    6.69    0.78
  -2   8  -2    5.89    0.67
   2   8   2    5.00    0.62
  -2   8  -2    6.12    0.75
   2   8   2    5.37    0.67
  -2   8  -2    7.40    0.67
  -2   8  -2    7.54    0.75
   2   8   2    4.85    0.62
  -2   8  -2    6.42    0.61
  -2   8  -2    6.91    0.62
   2   8   2    4.36    0.60
   2  -8   2    5.42    0.64
   2  -8   2    7.10    0.62
  -2  -8  -2    4.20    0.64
  -2  -8  -2    5.78    0.85
  -2  -8  -2    5.16    0.64
  -2  -8  -2    4.56    0.61
   2  -8   2    7.19    0.67
  -2  -8  -2    4.40    0.62
   2  -8   2    7.33    0.63
   2  -8   2    6.32    0.60
   2  -8   2    6.83    0.78
  -2  -8  -2    4.64    0.59
   2  -8   2    6.21    0.70
  -2  -8  -2    3.78    0.61
   2  -8   2    6.53    0.66
   2  -8   2    6.40    0.68
  -2   8  -4   20.87    2.05
   2   8   4   26.41    2.02
  -2   8  -4   23.65    2.02
   2   8   4   23.82    2.05
   2   8   4   20.05    2.12
   2   8   4   23.22    2.11
  -2   8  -4   28.59    2.03
  -2   8  -4   21.96    1.99
   2  -8   4   26.30    2.01
  -2  -8  -4   20.82    2.05
  -2  -8  -4   22.78    2.02
   2  -8   4   25.44    2.09
  -2  -8  -4   25.23    2.09
  -2  -8  -4   25.95    2.08
   2  -8   4   24.82    1.99
  -2  -8  -4   22.66    2.07
  -2  -8  -4   20.56    2.05
   2  -8   4   24.78    2.02
  -2  -8  -4   27.14    2.09
  -2   8  -6   10.31    1.05
   2   8   6   14.95    1.13
   2   8   6   13.28    1.21
   2   8   6   12.51    1.19
  -2   8  -6   11.24    1.07
  -2   8  -6   13.09    1.09
   2   8   6   12.08    1.14
   2  -8   6    9.76    1.06
  -2  -8  -6    9.78    1.04
  -2  -8  -6   11.72    1.18
  -2  -8  -6   11.49    1.21
   2  -8   6    8.41    1.09
   2  -8   6   11.60    1.11
  -2  -8  -6   12.10    1.17
  -2  -8  -6   12.44    1.14
  -2  -8  -6   11.90    1.06
  -2   8  -8    2.73    0.41
   2   8   8    2.31    0.50
   2   8   8    2.73    0.53
  -2   8  -8    2.11    0.38
   2   8   8    2.34    0.44
   2   8   8    2.12    0.54
  -2  -8  -8    2.41    0.51
  -2  -8  -8    3.14    0.59
  -2  -8  -8    2.79    0.56
   2  -8   8    1.22    0.41
  -2  -8  -8    2.51    0.53
   2  -8   8    1.84    0.43
   2  -8   8    2.38    0.44
  -2  -8  -8    2.07    0.37
   2   8  10    2.02    0.61
   2   8  10    1.58    0.53
   2   8  10    1.85    0.47
  -2   8 -10    1.50    0.42
   2   8  10    2.03    0.50
  -2   8 -10    1.72    0.40
  -2  -8 -10    1.37    0.36
   2  -8  10    2.09    0.45
  -2  -8 -10    1.71    0.60
   2  -8  10    1.83    0.46
  -2  -8 -10    0.99    0.35
  -2  -8 -10    1.13    0.52
  -2  -8 -10    1.42    0.46
  -2  -8 -10    0.87    0.48
  -2   8 -12    4.70    0.58
   2   8  12    4.27    0.68
   2   8  12    4.23    0.79
  -2   8 -12    4.42    0.67
   2   8  12    3.37    0.72
   2   8  12    4.72    0.80
  -2  -8 -12    3.78    0.81
  -2  -8 -12    4.96    0.79
   2  -8  12    3.89    0.63
   2  -8  12    5.85    0.73
  -2  -8 -12    3.89    0.57
   2   8  14    1.18    0.57
   2   8  14    0.91    0.60
  -2   8 -14    0.76    0.53
   2   8  14    1.01    0.66
   2   8  14    0.82    0.48
  -2  -8 -14    1.06    0.71
   2  -8  14    1.94    0.55
  -2  -8 -14    0.88    0.41
   2  -8  14    0.99    0.50
   2   8  16    0.63    0.74
   2   8  16    0.99    0.66
   2   8  16    0.25    0.49
   2  -8  16    0.22    0.66
  -2  -8 -16    0.23    0.41
  -2  -8 -16    1.31    0.62
  -2  -8 -16    0.30    0.71
  -2   9  15    0.89    0.58
  -2   9  15    0.55    0.51
  -2   9  15    2.57    0.70
   2   9 -15    1.92    0.59
  -2   9  15    2.85    0.69
   2  -9 -15    1.81    0.69
   2  -9 -15    2.28    0.82
   2  -9 -15    1.12    0.45
  -2  -9  15    1.84    0.63
   2   9 -13    4.05    0.70
  -2   9  13    5.24    1.08
  -2   9  13    5.55    0.84
  -2   9  13    4.85    0.82
   2   9 -13    3.65    0.62
   2  -9 -13    5.61    0.69
   2  -9 -13    5.74    0.73
   2  -9 -13    3.60    0.89
  -2  -9  13    3.98    0.76
  -2  -9  13    4.04    0.72
   2  -9 -13    5.21    0.91
   2   9 -11   19.78    1.87
  -2   9  11   21.34    1.92
  -2   9  11   21.75    1.89
   2   9 -11   17.82    1.80
  -2   9  11   18.98    1.93
  -2  -9  11   21.49    1.92
  -2  -9  11   20.64    1.91
   2  -9 -11   20.16    1.96
   2  -9 -11   20.12    1.80
  -2  -9  11   17.80    1.76
   2  -9 -11   23.56    2.02
   2   9  -9    0.29    0.32
  -2   9   9    0.22    0.37
  -2   9   9    0.91    0.39
  -2   9   9    0.56    0.32
  -2   9   9    0.75    0.48
   2   9  -9    0.23    0.40
  -2   9   9    0.99    0.45
   2  -9  -9    0.60    0.46
  -2  -9   9    0.78    0.43
  -2  -9   9    0.45    0.31
   2  -9  -9    0.56    0.47
   2  -9  -9    0.53    0.30
   2  -9  -9    0.08    0.42
  -2  -9   9   -0.07    0.40
   2  -9  -9    0.01    0.33
  -2   9   7   20.76    1.76
  -2   9   7   18.52    1.67
   2   9  -7   19.41    1.71
   2   9  -7   19.93    1.68
  -2   9   7   18.69    1.71
  -2   9   7   20.17    1.76
  -2   9   7   17.97    1.74
   2  -9  -7   19.52    1.77
   2  -9  -7   20.11    1.75
  -2  -9   7   19.68    1.74
  -2  -9   7   19.82    1.74
   2  -9  -7   17.94    1.78
  -2  -9   7   17.10    1.72
  -2  -9   7   18.15    1.65
   2  -9  -7   20.76    1.67
   2   9  -5   10.10    1.05
   2  -9  -5    9.86    1.09
  -2  -9   5   13.44    1.03
   2  -9  -5    9.77    1.13
  -2   9   3   31.59    2.71
  -2   9   3   35.68    2.74
  -2   9   3   35.01    2.69
   2   9  -3   29.46    2.68
  -2   9   3   30.53    2.73
   2   9  -3   29.61    2.65
   2   9  -3   34.46    2.69
  -2   9   3   34.20    2.70
   2   9  -3   33.45    2.70
   2   9  -3   33.76    2.69
   2   9  -3   33.75    2.68
   2  -9  -3   31.72    2.75
   2  -9  -3   34.51    2.77
  -2  -9   3   32.44    2.68
   2  -9  -3   29.56    2.67
  -2  -9   3   29.44    2.75
  -2  -9   3   35.88    2.70
   2  -9  -3   31.86    2.72
  -2  -9   3   30.71    2.66
   2   9  -1   23.65    2.03
   2   9  -1   24.06    2.04
   2   9  -1   23.24    2.02
   2   9  -1   25.92    2.00
  -2   9   1   23.79    1.99
   2   9  -1   24.64    2.00
  -2   9   1   24.00    2.00
  -2   9   1   20.63    2.00
  -2   9   1   22.59    2.00
  -2   9   1   24.81    2.04
  -2   9   1   24.94    2.01
   2   9  -1   22.91    2.01
  -2   9   1   22.96    2.00
   2  -9  -1   23.04    2.01
   2  -9  -1   23.24    2.06
  -2  -9   1   24.50    2.06
  -2  -9   1   23.61    2.03
  -2  -9   1   23.71    2.04
   2  -9  -1   25.65    2.06
  -2  -9   1   24.26    2.01
   2  -9  -1   25.00    2.01
  -2  -9   1   22.28    2.00
   2  -9  -1   23.35    1.99
   2   9   1   22.40    2.06
   2   9   1   23.53    2.05
   2   9   1   22.85    2.09
  -2   9  -1   24.30    2.05
  -2   9  -1   20.94    2.02
  -2   9  -1   23.49    2.01
   2   9   1   24.36    2.01
  -2   9  -1   25.26    2.05
  -2   9  -1   27.50    2.02
  -2   9  -1   25.32    2.04
   2   9   1   23.75    2.04
   2   9   1   25.54    2.10
   2  -9   1   21.53    2.04
   2  -9   1   26.76    2.06
   2  -9   1   24.97    2.10
   2  -9   1   23.52    2.07
  -2  -9  -1   25.38    2.07
   2  -9   1   24.69    2.09
   2  -9   1   25.57    2.00
  -2  -9  -1   24.77    2.07
  -2  -9  -1   23.70    2.08
   2  -9   1   24.18    2.01
  -2  -9  -1   23.82    2.10
  -2   9  -3   40.03    2.77
   2   9   3   38.91    2.77
   2   9   3   33.44    2.75
   2   9   3   39.02    2.82
   2   9   3   29.23    2.80
  -2   9  -3   32.00    2.86
   2   9   3   32.59    2.77
   2   9   3   29.63    2.77
  -2   9  -3   34.07    2.73
  -2   9  -3   35.08    2.74
   2   9   3   29.29    2.73
   2  -9   3   31.77    2.80
  -2  -9  -3   30.36    2.79
  -2  -9  -3   33.12    2.79
   2  -9   3   34.81    2.72
   2  -9   3   34.28    2.79
   2  -9   3   37.02    2.74
  -2  -9  -3   28.55    2.77
  -2  -9  -3   32.09    2.76
  -2  -9  -3   31.30    2.79
  -2  -9  -3   30.57    2.76
  -2   9  -5    7.14    0.76
  -2   9  -5    7.84    0.74
   2   9   5    9.21    0.81
  -2  -9  -5    7.36    0.88
   2  -9   5    6.11    0.74
   2   9   7   19.54    1.73
   2   9   7   20.85    1.68
  -2   9  -7   18.65    1.66
   2   9   7   19.88    1.78
   2   9   7   20.37    1.76
   2  -9   7   19.74    1.65
   2  -9   7   19.50    1.69
  -2  -9  -7   16.07    1.76
  -2  -9  -7   17.13    1.71
  -2  -9  -7   18.40    1.64
   2  -9   7   18.49    1.70
  -2   9  -9    0.20    0.30
   2   9   9    0.74    0.37
   2   9   9    0.73    0.47
  -2   9  -9    0.74    0.35
   2   9   9    0.29    0.48
   2   9   9    0.30    0.39
  -2  -9  -9   -0.44    0.47
  -2  -9  -9    0.04    0.38
  -2  -9  -9    0.77    0.43
  -2  -9  -9    0.53    0.44
  -2  -9  -9    0.62    0.30
   2  -9   9    0.71    0.38
   2  -9   9    0.12    0.35
  -2   9 -11   18.83    1.76
   2   9  11   20.65    1.86
   2   9  11   22.50    1.94
   2   9  11   21.07    1.92
  -2   9 -11   20.33    1.81
   2   9  11   23.39    2.01
   2  -9  11   18.81    1.80
   2  -9  11   20.28    1.94
  -2  -9 -11   20.04    1.99
  -2  -9 -11   18.40    1.74
  -2  -9 -11   17.16    1.82
  -2  -9 -11   19.98    1.75
  -2  -9 -11   19.65    1.90
   2   9  13    6.59    0.96
   2   9  13    3.72    0.96
   2   9  13    3.57    0.68
  -2   9 -13    5.04    0.64
  -2   9 -13    3.94    0.69
   2   9  13    4.57    0.84
  -2  -9 -13    4.30    0.62
  -2  -9 -13    5.31    0.92
   2  -9  13    3.99    0.72
   2  -9  13    4.57    0.69
  -2  -9 -13    5.51    0.88
   2   9  15    1.92    0.58
   2   9  15    1.76    0.82
   2   9  15    1.78    0.69
   2   9  15    0.82    0.61
  -2  -9 -15    0.64    0.41
   2  -9  15    2.12    0.59
  -2  -9 -15    1.71    0.74
   2  -9  15    2.14    0.54
  -2  -9 -15    1.03    0.72
   2  10 -16    1.17    0.52
  -2  10  16    1.67    0.63
  -2  10  16    1.73    0.68
   2  10 -16    1.33    0.61
  -2  10  16    1.61    0.70
   2 -10 -16    1.96    0.55
   2 -10 -16    2.42    0.83
  -2 -10  16    1.96    0.69
   2 -10 -16    0.97    0.52
  -2 -10  16    2.21    0.71
   2 -10 -16    3.94    1.01
  -2  10  14    5.10    0.86
   2  10 -14    2.85    0.59
  -2  10  14    3.84    0.71
  -2  10  14    2.30    0.74
   2  10 -14    3.93    0.69
  -2 -10  14    3.99    0.84
   2 -10 -14    3.07    0.79
  -2 -10  14    4.07    0.73
   2 -10 -14    3.06    0.61
   2 -10 -14    4.07    0.64
   2 -10 -14    3.77    0.93
  -2  10  12    8.57    1.43
  -2  10  12   12.93    1.40
   2  10 -12   11.50    1.28
  -2  10  12   11.43    1.30
   2  10 -12    9.23    1.18
   2 -10 -12   13.34    1.61
   2 -10 -12   12.21    1.58
  -2 -10  12   12.35    1.34
   2 -10 -12   10.69    1.18
   2 -10 -12   12.94    1.23
  -2 -10  12   10.43    1.31
  -2  10  10    0.15    0.40
   2  10 -10    0.29    0.37
  -2  10  10    0.74    0.52
  -2  10  10    0.95    0.45
  -2  10  10    0.71    0.54
   2  10 -10    0.17    0.42
  -2 -10  10    0.80    0.46
   2 -10 -10    0.11    0.51
  -2 -10  10    0.15    0.31
   2 -10 -10    0.13    0.46
   2 -10 -10    0.46    0.43
  -2 -10  10    0.52    0.47
   2 -10 -10    1.11    0.36
   2 -10 -10    1.46    0.58
  -2  10   8   10.09    1.17
  -2  10   8    9.96    1.07
  -2  10   8   10.33    1.04
   2  10  -8    9.07    1.02
  -2  10   8   11.30    1.13
  -2  10   8    9.64    1.08
   2  10  -8   10.17    1.10
  -2 -10   8    9.67    1.15
   2 -10  -8    9.75    1.16
   2 -10  -8    9.93    1.14
   2 -10  -8    8.68    1.00
  -2 -10   8    9.53    1.12
  -2 -10   8    8.93    0.98
   2 -10  -8   11.74    1.20
  -2  10   6   12.08    1.22
  -2  10   6   14.22    1.66
  -2  10   6   12.80    1.13
   2  10  -6   10.98    1.10
   2  10  -6   12.44    1.17
  -2  10   6   12.22    1.20
  -2 -10   6   11.46    1.18
   2 -10  -6   12.05    1.19
   2 -10  -6   11.93    1.09
   2 -10  -6    9.95    1.22
  -2 -10   6   13.74    1.22
  -2 -10   6   11.17    1.08
   2 -10  -6   10.35    1.13
  -2 -10   6   11.65    1.16
  -2 -10   6    8.30    1.16
   2  10  -4   56.72    4.28
   2  10  -4   59.07    4.31
  -2  10   4   53.47    4.31
  -2  10   4   51.85    4.29
  -2  10   4   47.15    4.31
  -2  10   4   50.60    4.33
   2  10  -4   52.97    4.28
  -2 -10   4   49.89    4.27
  -2 -10   4   54.46    4.28
   2 -10  -4   51.26    4.27
  -2 -10   4   55.84    4.35
   2 -10  -4   51.53    4.32
   2 -10  -4   48.14    4.28
   2 -10  -4   53.23    4.32
   2 -10  -4   56.81    4.35
  -2  10   2   24.46    2.31
  -2  10   2   26.82    2.33
  -2  10   2   28.57    2.37
  -2  10   2   27.82    2.33
   2  10  -2   29.28    2.33
   2  10  -2   28.33    2.37
  -2  10   2   28.12    2.37
   2  10  -2   28.63    2.34
   2  10  -2   25.15    2.28
   2  10  -2   28.59    2.33
   2  10  -2   29.12    2.35
   2 -10  -2   32.92    2.42
  -2 -10   2   25.23    2.30
  -2 -10   2   28.06    2.32
  -2 -10   2   27.13    2.41
   2 -10  -2   28.06    2.35
  -2 -10   2   27.20    2.34
   2 -10  -2   27.35    2.39
  -2 -10   2   26.84    2.40
   2 -10  -2   26.73    2.35
  -2  10   0   51.82    4.41
  -2  10   0   51.22    4.42
   2  10   0   53.35    4.43
  -2  10   0   57.06    4.43
  -2  10   0   53.73    4.44
  -2  10   0   50.72    4.40
   2  10   0   58.48    4.46
   2  10   0   63.01    4.45
   2  10   0   53.00    4.45
   2  10   0   51.14    4.42
  -2 -10   0   54.34    4.43
   2 -10   0   54.00    4.42
   2 -10   0   58.77    4.48
   2 -10   0   51.17    4.48
   2 -10   0   48.27    4.40
  -2 -10   0   57.40    4.48
  -2 -10   0   57.33    4.45
   2 -10   0   60.34    4.43
  -2  10  -2   29.35    2.38
   2  10   2   31.42    2.36
   2  10   2   32.37    2.46
   2  10   2   25.03    2.38
  -2  10  -2   24.92    2.34
  -2  10  -2   28.83    2.37
  -2  10  -2   27.87    2.32
  -2  10  -2   29.98    2.39
  -2  10  -2   26.22    2.35
   2  10   2   29.67    2.45
   2  10   2   27.42    2.40
   2  10   2   31.52    2.41
   2 -10   2   29.14    2.36
   2 -10   2   26.41    2.31
  -2 -10  -2   28.66    2.43
   2 -10   2   33.90    2.47
  -2 -10  -2   26.49    2.40
  -2 -10  -2   27.51    2.42
  -2 -10  -2   29.29    2.46
  -2 -10  -2   25.30    2.43
   2 -10   2   26.24    2.38
   2 -10   2   29.70    2.44
   2 -10   2   28.60    2.38
  -2  10  -4   51.40    4.27
   2  10   4   49.07    4.34
   2  10   4   54.53    4.31
  -2  10  -4   49.44    4.26
   2  10   4   50.04    4.29
   2  10   4   60.57    4.35
  -2  10  -4   56.06    4.30
  -2  10  -4   53.89    4.28
  -2 -10  -4   50.74    4.33
   2 -10   4   56.05    4.33
  -2 -10  -4   57.86    4.35
  -2 -10  -4   52.19    4.32
  -2 -10  -4   51.91    4.30
  -2 -10  -4   46.02    4.33
  -2 -10  -4   54.46    4.32
   2 -10   4   58.19    4.36
   2 -10   4   49.53    4.28
  -2  10  -6   12.59    1.14
   2  10   6   11.91    1.35
   2  10   6   11.43    1.16
   2  10   6   12.47    1.23
  -2  10  -6   12.77    1.07
   2 -10   6   12.51    1.22
  -2 -10  -6   12.39    1.20
  -2 -10  -6    9.22    1.17
  -2 -10  -6   11.76    1.23
   2 -10   6   11.49    1.12
  -2 -10  -6   11.44    1.19
   2 -10   6   12.30    1.17
  -2 -10  -6   10.46    1.08
   2  10   8   10.50    1.20
  -2  10  -8   10.01    1.03
   2  10   8    9.09    1.04
   2  10   8    9.98    1.09
  -2 -10  -8    9.65    1.20
   2 -10   8    9.73    1.06
  -2 -10  -8    8.27    1.11
   2 -10   8    9.66    1.03
  -2 -10  -8   10.29    0.98
  -2 -10  -8    9.05    1.12
   2  10  10    0.29    0.50
   2  10  10    1.49    0.44
  -2  10 -10    0.28    0.38
   2  10  10    0.75    0.43
   2  10  10    0.64    0.56
   2  10  10    0.38    0.41
  -2 -10 -10    0.33    0.33
   2 -10  10    0.79    0.43
   2 -10  10    1.38    0.43
  -2 -10 -10    0.36    0.50
  -2 -10 -10    0.68    0.54
  -2 -10 -10    0.27    0.44
   2  10  12   13.11    1.53
  -2  10 -12   12.10    1.22
   2  10  12    9.90    1.30
  -2  10 -12   13.75    1.26
   2  10  12   11.27    1.39
   2  10  12   11.62    1.31
   2 -10  12   12.17    1.24
  -2 -10 -12   12.64    1.17
  -2 -10 -12    8.94    1.34
  -2 -10 -12   11.91    1.17
   2 -10  12   12.99    1.31
  -2 -10 -12    9.75    1.27
  -2 -10 -12   11.32    1.39
   2  10  14    2.67    0.75
   2  10  14    3.77    0.82
  -2  10 -14    3.63    0.67
   2  10  14    3.95    0.95
  -2 -10 -14    3.34    0.81
   2 -10  14    4.00    0.69
  -2 -10 -14    3.03    0.56
   2 -10  14    3.45    0.70
  -2 -10 -14    2.73    0.85
   2  10  16    2.12    0.84
   2  10  16    1.41    0.68
   2  10  16    1.67    0.61
  -2 -10 -16    2.16    0.53
  -2 -10 -16    3.08    0.81
   2 -10  16    3.19    0.69
  -2 -10 -16    3.31    1.01
   2  11 -15    0.51    0.46
   2  11 -15   -0.61    0.50
  -2  11  15    0.17    0.60
  -2  11  15   -0.41    0.43
  -2  11  15    0.10    0.54
  -2 -11  15    1.37    0.64
   2 -11 -15   -0.75    0.36
   2 -11 -15    0.59    0.69
  -2 -11  15   -0.26    0.50
   2 -11 -15   -0.41    0.60
   2 -11 -15   -0.24    0.43
   2  11 -13    0.72    0.42
  -2  11  13    0.76    0.50
  -2  11  13    0.33    0.51
   2  11 -13    1.36    0.52
  -2  11  13    1.37    0.64
   2 -11 -13    1.17    0.44
   2 -11 -13    0.61    0.43
  -2 -11  13    0.87    0.58
  -2 -11  13    0.46    0.52
   2 -11 -13    0.93    0.58
   2 -11 -13    0.98    0.66
   2  11 -11    0.65    0.49
   2  11 -11    0.49    0.39
  -2  11  11    0.43    0.55
  -2  11  11    0.98    0.47
  -2 -11  11    0.76    0.51
  -2 -11  11    0.26    0.46
   2 -11 -11    0.84    0.57
   2 -11 -11    0.86    0.37
  -2 -11  11    0.40    0.35
   2 -11 -11    1.65    0.45
   2 -11 -11    1.46    0.62
   2 -11 -11    0.62    0.57
  -2  11   9   33.94    2.68
  -2  11   9   28.46    2.61
   2  11  -9   28.99    2.56
  -2  11   9   31.78    2.64
  -2  11   9   28.59    2.66
  -2  11   9   28.07    2.56
   2  11  -9   32.15    2.60
   2 -11  -9   28.79    2.66
   2 -11  -9   29.97    2.55
  -2 -11   9   33.07    2.66
   2 -11  -9   31.49    2.64
  -2 -11   9   27.85    2.53
   2 -11  -9   27.49    2.64
  -2 -11   9   29.96    2.61
  -2  11   7    3.80    0.58
   2  11  -7    2.36    0.45
  -2  11   7    3.34    0.51
  -2  11   7    2.34    0.57
  -2  11   7    2.40    0.48
   2  11  -7    2.94    0.58
  -2  11   7    1.79    0.51
  -2 -11   7    4.10    0.62
  -2 -11   7    2.52    0.43
   2 -11  -7    2.50    0.57
   2 -11  -7    3.52    0.86
  -2 -11   7    2.20    0.56
   2 -11  -7    3.24    0.64
   2 -11  -7    3.44    0.47
   2 -11  -7    2.03    0.49
  -2 -11   7    3.63    0.58
   2  11  -5    9.28    0.92
  -2  11   5    9.63    0.96
   2  11  -5    9.65    0.92
   2  11  -5    8.02    0.99
  -2  11   5    9.60    1.05
   2  11  -5    8.76    0.84
  -2  11   5    9.65    1.01
  -2  11   5    9.63    1.22
   2 -11  -5   10.15    1.17
   2 -11  -5    6.98    0.98
  -2 -11   5    8.09    0.90
   2 -11  -5    8.62    0.90
   2 -11  -5    7.02    0.98
  -2 -11   5   10.40    0.92
  -2 -11   5    9.70    1.05
   2 -11  -5    8.86    1.02
  -2 -11   5   10.06    1.06
  -2 -11   5    8.37    0.99
   2  11  -3   57.76    4.47
   2  11  -3   57.64    4.48
   2  11  -3   55.61    4.47
   2  11  -3   55.42    4.47
   2  11  -3   51.89    4.44
   2  11  -3   57.89    4.50
  -2  11   3   52.06    4.51
  -2  11   3   52.33    4.49
  -2  11   3   55.24    4.50
  -2  11   3   52.89    4.48
  -2 -11   3   52.18    4.45
   2 -11  -3   54.74    4.50
   2 -11  -3   53.00    4.52
  -2 -11   3   57.77    4.47
  -2 -11   3   53.14    4.46
   2 -11  -3   53.29    4.45
  -2 -11   3   57.93    4.55
  -2 -11   3   59.45    4.54
   2 -11  -3   58.62    4.54
  -2  11   1   13.39    1.26
   2  11  -1   12.80    1.24
  -2  11   1   10.15    1.20
   2  11  -1   14.17    1.12
   2  11  -1   10.07    1.21
   2  11  -1   11.08    1.19
   2  11  -1   11.43    1.26
  -2  11   1   15.89    1.17
  -2  11   1   12.03    1.20
   2  11  -1   12.84    1.23
   2 -11  -1   13.23    1.18
   2 -11  -1   13.03    1.28
  -2 -11   1    9.21    1.33
   2 -11  -1    9.69    1.31
  -2 -11   1   13.24    1.19
  -2 -11   1   11.81    1.32
  -2 -11   1    8.16    1.21
  -2 -11   1   11.92    1.30
   2 -11  -1   13.47    1.23
  -2  11  -1   12.18    1.13
   2  11   1   13.20    1.22
  -2  11  -1    9.14    1.20
  -2  11  -1   15.40    1.14
  -2  11  -1   12.19    1.21
   2  11   1   12.62    1.25
   2  11   1   14.91    1.18
   2  11   1   12.52    1.29
   2  11   1   11.27    1.24
  -2  11  -1    8.64    1.24
  -2 -11  -1    9.21    1.36
   2 -11   1   14.24    1.27
  -2 -11  -1   12.25    1.34
   2 -11   1   12.02    1.32
   2 -11   1   14.43    1.11
  -2 -11  -1   12.29    1.23
  -2 -11  -1   12.68    1.30
  -2 -11  -1    8.96    1.22
   2 -11   1   13.05    1.30
   2 -11   1   13.72    1.16
  -2  11  -3   52.93    4.55
  -2  11  -3   57.16    4.56
   2  11   3   58.24    4.62
  -2  11  -3   53.47    4.55
   2  11   3   59.09    4.58
  -2  11  -3   56.67    4.54
   2  11   3   55.12    4.61
  -2  11  -3   57.32    4.57
   2  11   3   57.86    4.58
   2  11   3   59.61    4.61
  -2  11  -3   52.88    4.55
  -2 -11  -3   54.93    4.60
  -2 -11  -3   51.83    4.55
   2 -11   3   58.29    4.54
   2 -11   3   62.94    4.56
  -2 -11  -3   60.64    4.63
  -2 -11  -3   51.43    4.61
   2 -11   3   52.93    4.55
   2 -11   3   60.89    4.61
   2 -11   3   54.17    4.62
  -2 -11  -3   55.50    4.60
  -2 -11  -3   57.27    4.61
  -2  11  -5    8.98    0.89
   2  11   5    7.86    0.97
   2  11   5   10.04    1.00
   2  11   5    9.29    0.94
  -2  11  -5   10.85    0.97
   2 -11   5    8.32    0.99
   2 -11   5    9.83    1.05
  -2 -11  -5    9.04    1.04
  -2 -11  -5    9.77    1.04
   2 -11   5    8.23    0.92
  -2 -11  -5    9.70    1.04
   2  11   7    2.61    0.53
  -2  11  -7    2.77    0.49
   2  11   7    2.37    0.59
   2  11   7    3.11    0.52
  -2  11  -7    2.57    0.41
   2  11   7    2.65    0.59
  -2 -11  -7    2.37    0.56
   2 -11   7    2.74    0.54
  -2 -11  -7    2.13    0.56
  -2 -11  -7    3.17    0.59
   2 -11   7    2.73    0.55
   2 -11   7    3.80    0.51
   2  11   9   28.23    2.62
   2  11   9   28.98    2.62
  -2  11  -9   32.11    2.53
   2  11   9   28.81    2.66
   2  11   9   29.52    2.67
   2 -11   9   31.29    2.54
  -2 -11  -9   26.85    2.50
  -2 -11  -9   29.99    2.64
   2 -11   9   30.83    2.57
  -2 -11  -9   28.80    2.68
   2  11  11    0.06    0.55
   2  11  11    1.19    0.55
   2  11  11    0.49    0.42
   2  11  11    0.72    0.61
   2  11  11    0.56    0.45
  -2  11 -11    0.55    0.39
  -2 -11 -11    0.22    0.44
   2 -11  11    0.47    0.39
  -2 -11 -11    0.37    0.59
  -2 -11 -11    0.54    0.54
  -2 -11 -11    0.16    0.33
   2 -11  11    0.20    0.46
   2  11  13    0.08    0.50
   2  11  13   -0.57    0.60
   2  11  13   -0.23    0.44
  -2  11 -13    0.47    0.77
   2  11  13    0.74    0.60
  -2 -11 -13    0.24    0.63
  -2 -11 -13    0.64    0.58
   2 -11  13    1.21    0.47
   2 -11  13    0.61    0.57
  -2 -11 -13    0.53    0.37
  -2 -11 -13    0.90    0.38
   2  11  15   -0.21    0.63
   2  11  15    0.27    0.49
   2  11  15   -0.10    0.53
   2 -11  15    0.14    0.50
  -2 -11 -15   -0.29    0.59
   2 -11  15    0.23    0.52
  -2 -11 -15    0.08    0.40
  -2 -11 -15    0.09    0.62
   2  12 -14    1.39    0.50
   2  12 -14    0.38    0.53
  -2  12  14    1.76    0.67
  -2  12  14    1.18    0.70
  -2  12  14    1.66    0.61
   2 -12 -14    2.23    0.56
   2 -12 -14    1.73    0.50
  -2 -12  14    1.59    0.59
   2 -12 -14    2.35    0.81
  -2 -12  14    1.22    0.64
  -2  12  12    4.22    0.77
  -2  12  12    2.22    0.73
   2  12 -12    1.87    0.52
  -2  12  12    1.81    0.59
   2  12 -12    2.93    0.65
   2 -12 -12    2.64    0.75
   2 -12 -12    1.94    0.51
  -2 -12  12    2.97    0.70
   2 -12 -12    1.48    0.50
  -2 -12  12    2.52    0.61
   2 -12 -12    2.45    0.78
  -2  12  10    0.65    0.45
   2  12 -10    0.96    0.45
  -2  12  10    1.74    0.61
  -2  12  10    0.91    0.62
   2  12 -10    1.11    0.52
  -2  12  10    1.25    0.44
  -2  12  10    1.42    0.51
  -2 -12  10    1.18    0.58
   2 -12 -10    1.38    0.62
   2 -12 -10    1.42    0.41
   2 -12 -10    1.40    0.62
   2 -12 -10    2.04    0.61
  -2 -12  10    1.33    0.39
  -2 -12  10    1.78    0.52
   2 -12 -10    1.30    0.40
  -2  12   8    1.30    0.55
  -2  12   8    1.15    0.40
  -2  12   8    1.50    0.55
  -2  12   8    2.30    0.48
  -2  12   8    0.82    0.44
   2  12  -8    0.44    0.46
   2  12  -8    1.16    0.39
   2 -12  -8    1.84    0.54
  -2 -12   8    1.38    0.58
   2 -12  -8    1.16    0.37
  -2 -12   8    1.43    0.51
   2 -12  -8    1.99    0.54
  -2 -12   8    0.22    0.32
   2 -12  -8    2.18    0.56
  -2 -12   8    0.78    0.51
   2  12  -6    1.95    0.51
   2  12  -6    1.60    0.39
  -2  12   6    1.00    0.45
  -2  12   6    0.64    0.39
  -2  12   6    0.56    0.47
   2  12  -6    0.38    0.36
  -2 -12   6    0.94    0.34
   2 -12  -6    0.27    0.43
   2 -12  -6    0.83    0.42
  -2 -12   6    1.93    0.47
  -2 -12   6    0.59    0.34
   2 -12  -6    0.87    0.44
   2 -12  -6    1.61    0.51
   2 -12  -6    0.47    0.31
  -2 -12   6    1.43    0.50
  -2  12   4    9.48    0.92
  -2  12   4    7.90    0.88
   2  12  -4    8.48    0.87
   2  12  -4    8.43    0.86
   2  12  -4    8.05    0.82
   2  12  -4    8.15    0.93
   2  12  -4    5.95    0.73
  -2 -12   4    8.44    0.84
   2 -12  -4    7.43    0.95
  -2 -12   4    6.83    0.91
  -2 -12   4    8.09    0.99
   2 -12  -4    7.16    1.01
   2 -12  -4    7.75    0.92
  -2 -12   4    8.61    0.96
  -2 -12   4    6.96    0.83
   2 -12  -4    7.74    0.87
  -2 -12   4    7.20    0.78
   2  12  -2    3.63    0.55
  -2  12   2    6.21    0.63
   2  12  -2    4.34    0.54
   2  12  -2    4.50    0.62
   2  12  -2    4.31    0.59
  -2  12   2    6.69    0.71
  -2  12   2    4.80    0.60
   2  12  -2    4.29    0.60
  -2  12   2    7.37    0.80
  -2  12   2    5.45    0.62
   2  12  -2    4.64    0.60
   2 -12  -2    6.39    0.72
  -2 -12   2    4.25    0.70
  -2 -12   2    4.06    0.59
  -2 -12   2    4.47    0.58
   2 -12  -2    4.12    0.59
   2 -12  -2    4.15    0.67
  -2 -12   2    3.79    0.60
   2 -12  -2    4.81    0.68
  -2 -12   2    4.27    0.68
   2  12   0   26.79    2.21
   2  12   0   24.86    2.22
   2  12   0   27.24    2.20
  -2  12   0   25.22    2.16
  -2  12   0   24.98    2.20
   2  12   0   25.74    2.18
  -2  12   0   23.25    2.18
  -2  12   0   26.09    2.19
   2  12   0   26.41    2.22
  -2 -12   0   28.05    2.21
  -2 -12   0   24.66    2.19
   2 -12   0   25.87    2.17
   2 -12   0   26.38    2.17
  -2 -12   0   25.36    2.19
  -2 -12   0   25.58    2.26
  -2 -12   0   25.52    2.24
   2 -12   0   25.33    2.24
   2 -12   0   25.08    2.24
  -2  12  -2    5.30    0.58
  -2  12  -2    5.80    0.61
   2  12   2    3.72    0.57
   2  12   2    4.42    0.66
   2  12   2    3.76    0.58
   2  12   2    3.14    0.50
   2  12   2    3.72    0.62
  -2  12  -2    5.08    0.58
  -2  12  -2    5.26    0.56
   2  12   2    3.02    0.57
  -2  12  -2    4.40    0.55
   2 -12   2    5.86    0.58
  -2 -12  -2    3.97    0.59
   2 -12   2    5.00    0.55
   2 -12   2    5.05    0.68
  -2 -12  -2    3.70    0.66
  -2 -12  -2    4.98    0.70
   2 -12   2    6.55    0.71
  -2 -12  -2    3.61    0.60
   2 -12   2    5.01    0.55
  -2 -12  -2    3.97    0.61
  -2  12  -4    5.83    0.80
   2  12   4    6.71    0.81
  -2  12  -4    8.07    0.78
  -2  12  -4    8.58    0.81
  -2  12  -4    8.51    0.88
   2  12   4    8.26    0.99
   2  12   4    8.09    0.84
   2  12   4    6.56    1.04
   2 -12   4    6.85    0.87
  -2 -12  -4    7.26    0.89
  -2 -12  -4    7.65    0.97
   2 -12   4    8.56    0.85
   2 -12   4    9.01    0.94
   2 -12   4    7.45    0.77
  -2 -12  -4    7.18    0.94
   2 -12   4    6.71    0.79
   2  12   6    1.86    0.54
  -2  12  -6    0.26    0.37
   2  12   6    1.13    0.52
   2  12   6    1.73    0.38
  -2  12  -6    0.99    0.31
   2  12   6    0.29    0.37
   2  12   6    1.33    0.46
   2 -12   6    0.73    0.42
  -2 -12  -6    1.01    0.49
   2 -12   6    1.48    0.42
  -2 -12  -6    0.30    0.42
   2 -12   6    1.74    0.52
  -2 -12  -6    1.55    0.50
  -2 -12  -6    1.45    0.47
   2  12   8    1.05    0.49
   2  12   8    1.09    0.58
   2  12   8    1.37    0.57
  -2  12  -8    1.74    0.46
   2  12   8    0.83    0.44
  -2  12  -8    1.34    0.35
  -2 -12  -8    1.41    0.39
  -2 -12  -8    1.25    0.55
   2 -12   8    2.83    0.56
  -2 -12  -8    1.73    0.54
   2 -12   8    1.26    0.50
   2 -12   8    1.90    0.46
  -2 -12  -8    1.38    0.53
  -2  12 -10    2.34    0.59
   2  12  10    0.87    0.59
   2  12  10    1.32    0.66
   2  12  10    0.41    0.47
   2  12  10    1.09    0.47
  -2 -12 -10    0.43    0.35
  -2 -12 -10    1.08    0.54
   2 -12  10    1.02    0.50
   2 -12  10    1.66    0.83
  -2 -12 -10    0.98    0.60
  -2 -12 -10    0.40    0.48
   2  12  12    1.92    0.69
   2  12  12    2.78    0.82
  -2  12 -12    2.25    0.53
   2  12  12    1.45    0.51
   2  12  12    2.58    0.68
  -2 -12 -12    2.70    0.74
   2 -12  12    1.97    0.68
  -2 -12 -12    3.00    0.61
  -2 -12 -12    2.14    0.60
   2 -12  12    1.84    0.53
  -2 -12 -12    1.87    0.47
  -2 -12 -12    1.33    0.64
   2  12  14    2.54    0.83
   2  12  14    2.60    0.64
   2  12  14    2.73    0.84
  -2  12 -14    1.98    0.54
   2 -12  14    2.09    0.55
  -2 -12 -14    2.92    0.87
  -2 -12 -14    2.23    0.49
  -2 -12 -14    2.68    0.53
   2 -12  14    1.33    0.58
  -2  13  15    1.41    0.74
   2  13 -15    0.26    0.56
  -2  13  15    0.47    0.61
  -2  13  15    1.20    0.60
   2  13 -15    0.37    0.46
   2 -13 -15    0.28    0.50
   2 -13 -15   -0.63    0.57
  -2 -13  15    0.79    0.56
  -2 -13  15   -0.22    0.66
   2 -13 -15    0.72    0.49
   2  13 -13    0.84    0.44
   2  13 -13    1.34    0.55
  -2  13  13    0.06    0.49
  -2  13  13    1.15    0.67
  -2  13  13    0.13    0.51
   2 -13 -13    1.60    0.47
   2 -13 -13    0.89    0.69
   2 -13 -13    0.66    0.45
   2 -13 -13    0.65    0.68
  -2 -13  13    1.13    0.64
  -2  13  11   22.59    2.14
   2  13 -11   23.62    2.01
  -2  13  11   20.62    1.91
   2  13 -11   20.57    1.92
  -2  13  11   21.06    2.01
  -2  13  11   21.63    2.05
  -2 -13  11   21.21    2.05
   2 -13 -11   20.24    1.91
   2 -13 -11   16.59    1.96
   2 -13 -11   20.70    1.94
   2 -13 -11   23.94    2.11
  -2  13   9    9.24    1.12
  -2  13   9   10.03    1.15
  -2  13   9   10.51    1.19
   2  13  -9    9.87    1.07
  -2  13   9    9.42    1.17
   2  13  -9    9.45    1.06
  -2  13   9    8.63    0.99
  -2 -13   9    7.68    1.09
   2 -13  -9    9.42    1.22
   2 -13  -9    8.56    1.02
  -2 -13   9    7.16    0.98
   2 -13  -9    9.00    1.13
  -2 -13   9   10.40    1.18
   2 -13  -9   11.17    1.23
  -2 -13   9   10.16    1.11
   2  13  -7   11.06    1.13
  -2  13   7   10.22    1.26
  -2  13   7   11.73    1.24
   2  13  -7   11.28    1.22
  -2  13   7   10.83    1.17
  -2  13   7   11.61    1.31
   2 -13  -7   10.40    1.35
  -2 -13   7   12.92    1.32
   2 -13  -7   10.32    1.24
  -2 -13   7   11.40    1.31
   2 -13  -7   10.43    1.24
  -2 -13   7    8.98    1.20
  -2 -13   7   12.79    1.10
   2 -13  -7   10.65    1.23
   2 -13  -7   11.96    1.13
  -2 -13   7    9.70    1.09
  -2  13   5    7.59    0.97
   2  13  -5    9.78    1.06
  -2  13   5   11.19    1.13
  -2  13   5    8.05    0.93
   2  13  -5    9.97    1.08
  -2  13   5   10.67    1.09
   2  13  -5    8.91    0.91
  -2 -13   5   10.72    1.20
  -2 -13   5    7.70    0.93
   2 -13  -5   10.84    1.18
  -2 -13   5    7.16    0.94
   2 -13  -5    8.39    1.06
  -2 -13   5    9.38    1.13
   2 -13  -5    7.05    0.93
   2 -13  -5    8.56    0.95
  -2 -13   5    9.34    1.03
   2 -13  -5    8.79    1.08
   2  13  -3   14.66    1.34
   2  13  -3   13.36    1.32
  -2  13   3   13.22    1.38
   2  13  -3   14.88    1.36
   2  13  -3   14.51    1.27
  -2  13   3   14.60    1.41
   2  13  -3   16.89    1.58
   2  13  -3   16.60    1.35
  -2  13   3   13.61    1.44
  -2  13   3   15.59    1.37
   2 -13  -3   14.33    1.37
   2 -13  -3   12.71    1.41
   2 -13  -3   13.90    1.31
   2 -13  -3   14.08    1.43
  -2 -13   3   15.04    1.33
  -2 -13   3   13.76    1.37
  -2 -13   3   13.00    1.31
   2  13  -1   13.78    1.32
   2  13  -1   14.26    1.27
   2  13  -1   13.76    1.34
  -2  13   1   13.13    1.33
   2  13  -1   14.91    1.34
   2  13  -1   13.32    1.32
  -2  13   1   13.29    1.30
  -2  13   1   15.76    1.29
  -2  13   1   13.75    1.30
  -2 -13   1   12.84    1.32
  -2 -13   1   14.99    1.40
  -2 -13   1   13.15    1.41
  -2 -13   1   13.12    1.30
   2 -13  -1   14.05    1.38
  -2 -13   1   12.81    1.28
   2 -13  -1   14.21    1.29
   2 -13  -1   13.95    1.30
   2 -13  -1   13.11    1.37
  -2  13  -1   13.47    1.32
  -2  13  -1   14.68    1.26
   2  13   1   14.12    1.37
   2  13   1   12.48    1.23
  -2  13  -1   14.69    1.31
  -2  13  -1   15.63    1.34
   2  13   1   15.35    1.35
   2  13   1   13.16    1.32
   2  13   1   14.83    1.38
   2  13   1   15.34    1.33
   2 -13   1   12.74    1.30
   2 -13   1   13.98    1.27
   2 -13   1   12.64    1.38
  -2 -13  -1   13.82    1.38
  -2 -13  -1   13.28    1.32
  -2 -13  -1   11.96    1.36
  -2 -13  -1   15.71    1.35
   2 -13   1   16.19    1.40
  -2 -13  -1   14.18    1.41
  -2  13  -3   12.66    1.25
   2  13   3   15.68    1.44
   2  13   3   14.69    1.42
   2  13   3   14.10    1.36
  -2  13  -3   15.62    1.36
  -2  13  -3   14.39    1.31
   2  13   3   14.09    1.36
  -2  13  -3   15.13    1.32
   2  13   3   14.65    1.51
   2 -13   3   10.89    1.54
  -2 -13  -3   12.88    1.63
  -2 -13  -3   16.56    1.56
  -2 -13  -3   14.30    1.42
  -2 -13  -3   14.80    1.45
   2 -13   3   13.40    1.28
   2 -13   3   14.31    1.32
   2 -13   3   15.42    1.27
   2 -13   3   14.42    1.41
  -2  13  -5    9.22    1.04
  -2  13  -5    7.91    0.86
   2  13   5   10.59    1.14
   2  13   5    8.36    0.99
  -2  13  -5    7.54    0.89
   2  13   5    9.07    0.95
   2  13   5    6.82    0.97
   2  13   5    7.64    0.91
   2 -13   5   13.24    1.60
  -2 -13  -5   10.39    1.07
  -2 -13  -5    8.50    1.06
  -2 -13  -5    9.85    1.10
  -2 -13  -5    8.92    1.03
   2 -13   5    8.34    0.96
   2 -13   5    9.10    1.07
   2 -13   5    6.46    0.87
  -2 -13  -5    8.59    1.01
  -2  13  -7   10.87    1.07
  -2  13  -7   12.60    1.23
   2  13   7   12.20    1.37
   2  13   7   11.55    1.24
   2  13   7   11.04    1.24
   2  13   7   11.19    1.18
  -2 -13  -7   10.64    1.28
   2 -13   7   11.07    1.27
  -2 -13  -7   10.53    1.12
  -2 -13  -7   12.28    1.28
  -2 -13  -7    8.98    1.27
  -2 -13  -7   10.96    1.28
   2 -13   7   11.12    1.19
   2 -13   7   11.24    1.23
   2  13   9   11.00    1.08
   2  13   9    9.99    1.19
  -2  13  -9    9.12    0.98
   2  13   9    6.83    1.11
  -2  13  -9    9.54    1.08
   2  13   9    9.49    1.20
  -2 -13  -9    8.56    0.98
  -2 -13  -9    7.35    1.14
   2 -13   9   11.03    1.53
   2 -13   9    9.85    1.16
  -2 -13  -9    9.61    1.16
   2 -13   9    9.00    1.07
  -2 -13  -9   10.02    1.19
   2  13  11   20.59    2.18
   2  13  11   21.12    2.08
  -2  13 -11   21.57    1.91
   2  13  11   21.45    2.12
   2  13  11   21.15    1.95
   2  13  11   20.73    2.42
  -2 -13 -11   19.81    2.05
  -2 -13 -11   18.21    1.87
   2 -13  11   22.84    1.95
  -2 -13 -11   22.21    2.37
  -2 -13 -11   17.80    2.01
   2 -13  11   23.33    1.99
   2  13  13    0.90    0.55
   2  13  13    1.03    0.49
   2  13  13    1.37    0.63
  -2  13 -13    1.47    0.51
  -2 -13 -13    0.26    0.64
  -2 -13 -13    1.09    0.57
  -2 -13 -13    0.47    0.40
   2 -13  13    1.00    0.51
  -2 -13 -13    0.05    0.58
   2 -13  13    1.64    0.59
  -2 -13 -13    0.87    0.42
   2  13  15    0.91    0.66
   2  13  15   -0.19    0.65
  -2  13 -15    0.69    0.53
   2  13  15    0.52    0.53
   2  13  15    0.84    0.71
  -2 -13 -15    0.95    0.47
   2 -13  15    0.06    1.07
   2 -13  15    1.37    0.68
  -2 -13 -15    2.60    0.78
   2  14 -14   -0.19    0.44
  -2  14  14    0.29    0.52
   2  14 -14    0.89    0.62
  -2  14  14   -0.52    0.45
  -2  14  14    0.68    0.66
   2 -14 -14    0.39    0.72
  -2 -14  14   -0.25    0.55
   2 -14 -14    0.10    0.64
   2 -14 -14    0.96    0.50
   2 -14 -14   -0.07    0.41
  -2 -14  14    0.16    0.66
  -2  14  12    3.47    0.77
  -2  14  12    5.29    0.67
  -2  14  12    5.46    0.82
  -2  14  12    3.35    0.87
   2  14 -12    4.21    0.74
   2  14 -12    1.95    0.59
   2 -14 -12    4.20    0.90
   2 -14 -12    3.46    0.63
  -2 -14  12    5.06    0.88
  -2 -14  12    4.38    0.75
   2 -14 -12    4.23    0.91
   2 -14 -12    3.85    0.69
   2 -14 -12    3.50    0.84
   2  14 -10    8.91    1.00
   2  14 -10    6.12    0.87
  -2  14  10    8.00    1.04
  -2  14  10    7.58    1.07
  -2  14  10    9.23    1.18
  -2  14  10    8.46    0.94
   2 -14 -10    9.60    1.15
   2 -14 -10    7.35    0.90
   2 -14 -10    9.22    1.14
  -2 -14  10    7.48    0.97
  -2 -14  10    7.56    1.03
   2 -14 -10    8.44    1.13
  -2 -14  10    9.06    1.10
  -2 -14  10    6.76    0.87
   2  14  -8    0.03    0.48
  -2  14   8    0.06    0.41
  -2  14   8    0.99    0.56
  -2  14   8    0.71    0.46
   2  14  -8    0.44    0.38
  -2  14   8   -0.15    0.52
  -2  14   8    0.30    0.40
   2 -14  -8   -0.06    0.51
   2 -14  -8    0.42    0.51
  -2 -14   8    0.32    0.53
  -2 -14   8    0.28    0.40
   2 -14  -8    0.26    0.57
  -2 -14   8    0.26    0.55
  -2 -14   8   -0.07    0.43
   2 -14  -8    0.46    0.47
   2 -14  -8    0.07    0.34
  -2  14   6    0.94    0.51
   2  14  -6    0.46    0.38
   2  14  -6    0.15    0.47
  -2  14   6    0.47    0.42
   2  14  -6    0.08    0.35
  -2  14   6    0.51    0.41
  -2  14   6    0.35    0.51
  -2 -14   6   -0.12    0.50
  -2 -14   6   -0.30    0.46
   2 -14  -6   -0.07    0.43
   2 -14  -6    1.16    0.45
  -2 -14   6    0.41    0.52
  -2 -14   6   -0.19    0.31
   2 -14  -6   -0.41    0.52
   2 -14  -6    0.35    0.45
   2 -14  -6    0.61    0.36
  -2 -14   6    0.71    0.36
   2  14  -4    3.68    0.52
   2  14  -4    5.91    0.69
  -2  14   4    4.92    0.68
   2  14  -4    4.26    0.61
  -2  14   4    3.78    0.66
  -2  14   4    3.94    0.70
   2  14  -4    4.56    0.61
   2  14  -4    4.93    0.59
  -2  14   4    4.02    0.62
   2 -14  -4    3.91    0.70
   2 -14  -4    4.39    0.67
   2 -14  -4    3.99    0.57
   2 -14  -4    4.60    0.74
  -2 -14   4    4.27    0.60
  -2 -14   4    5.49    0.65
  -2 -14   4    4.76    0.77
  -2 -14   4    7.01    1.00
  -2 -14   4    5.27    0.76
   2  14  -2    6.54    0.78
   2  14  -2    6.40    0.78
  -2  14   2    6.11    0.75
  -2  14   2    7.63    0.87
   2  14  -2    6.71    0.78
  -2  14   2    7.52    0.79
  -2  14   2    6.60    0.76
   2  14  -2    6.46    0.75
  -2 -14   2    6.25    0.86
  -2 -14   2    6.25    0.77
  -2 -14   2    5.66    0.74
   2 -14  -2    4.85    0.84
   2 -14  -2    7.32    0.90
   2 -14  -2    6.77    0.85
   2 -14  -2    6.36    0.78
  -2 -14   2    7.48    0.91
  -2 -14   2    6.87    0.85
   2  14   0    1.40    0.44
  -2  14   0    1.57    0.37
  -2  14   0    1.82    0.45
   2  14   0    1.95    0.47
  -2  14   0    1.82    0.41
  -2  14   0    2.66    0.45
   2  14   0    0.90    0.34
   2  14   0    1.51    0.47
   2 -14   0    2.77    0.45
   2 -14   0    2.50    0.53
  -2 -14   0    0.96    0.49
  -2 -14   0    1.18    0.49
  -2 -14   0    1.15    0.40
   2 -14   0    1.49    0.50
   2 -14   0    2.25    0.41
  -2 -14   0    0.49    0.46
   2  14   2    6.84    0.81
  -2  14  -2    6.83    0.80
   2  14   2    5.99    0.82
   2  14   2    6.28    0.79
   2  14   2    6.84    0.86
   2  14   2    7.07    0.84
  -2  14  -2    7.30    0.83
  -2  14  -2    7.01    0.84
  -2  14  -2    6.03    0.72
   2 -14   2    6.91    0.86
   2 -14   2    6.64    0.90
  -2 -14  -2    8.00    0.95
  -2 -14  -2    6.11    0.87
  -2 -14  -2    6.28    0.81
  -2 -14  -2    6.92    0.83
   2 -14   2    7.71    0.78
  -2 -14  -2    5.93    0.89
   2 -14   2    7.98    0.95
   2  14   4    4.45    0.66
   2  14   4    4.11    0.69
  -2  14  -4    4.42    0.62
  -2  14  -4    4.03    0.83
  -2  14  -4    4.53    0.56
   2  14   4    4.38    0.63
   2  14   4    3.83    0.66
   2  14   4    4.91    0.74
   2 -14   4    5.79    0.84
   2 -14   4    3.93    0.70
  -2 -14  -4    5.23    0.77
   2 -14   4    4.88    0.55
  -2 -14  -4    4.59    0.68
  -2 -14  -4    4.56    0.72
   2 -14   4    7.54    0.82
   2 -14   4    4.02    0.55
  -2 -14  -4    4.30    0.70
  -2 -14  -4    3.97    0.63
  -2  14  -6    1.26    0.46
   2  14   6   -0.03    0.44
  -2  14  -6    0.47    0.31
   2  14   6    0.27    0.39
   2  14   6   -0.05    0.50
   2  14   6    0.45    0.53
   2  14   6    0.48    0.39
  -2 -14  -6    0.13    0.48
  -2 -14  -6    0.45    0.49
  -2 -14  -6    0.39    0.50
   2 -14   6   -0.22    0.48
   2 -14   6   -0.10    0.47
   2 -14   6   -0.28    0.38
  -2 -14  -6    0.08    0.46
   2  14   8    0.01    0.58
   2  14   8    0.84    0.60
   2  14   8    0.41    0.44
  -2  14  -8    0.03    0.42
   2  14   8    0.54    0.50
  -2 -14  -8    0.26    0.53
   2 -14   8   -0.26    0.44
  -2 -14  -8   -0.02    0.51
  -2 -14  -8   -0.15    0.35
  -2 -14  -8   -0.09    0.52
  -2 -14  -8    0.63    0.53
   2 -14   8   -0.36    0.48
   2  14  10    9.24    1.14
   2  14  10    6.88    0.95
  -2  14 -10    7.66    0.92
   2  14  10    9.30    1.25
   2  14  10    7.32    1.08
   2 -14  10    7.75    1.00
  -2 -14 -10    6.45    0.86
   2 -14  10   10.07    1.17
  -2 -14 -10   10.77    1.31
   2 -14  10    7.70    0.94
  -2 -14 -10    7.32    1.09
  -2 -14 -10    7.49    1.06
  -2  14 -12    3.68    0.63
   2  14  12    4.02    0.69
   2  14  12    4.24    0.81
   2  14  12    4.08    0.92
   2  14  12    3.80    0.97
   2  14  12    2.58    0.70
  -2 -14 -12    3.75    0.87
  -2 -14 -12    2.41    0.74
   2 -14  12    3.55    0.64
  -2 -14 -12    2.86    0.69
  -2 -14 -12    2.93    0.58
   2 -14  12    3.81    0.72
  -2  14 -14    0.12    0.50
   2  14  14    0.30    0.59
   2  14  14    0.28    0.68
   2  14  14   -0.22    0.69
   2  14  14   -0.33    0.44
   2 -14  14    0.74    0.57
  -2 -14 -14   -0.13    0.66
   2 -14  14    1.04    0.55
  -2 -14 -14    0.55    0.41
  -2 -14 -14    0.58    0.66
  -2 -14 -14    0.07    0.39
  -2  15  13   -0.07    0.50
  -2  15  13    0.75    0.47
   2  15 -13    0.63    0.71
   2  15 -13   -0.02    0.41
  -2  15  13    0.30    0.62
  -2  15  13    0.08    0.53
   2 -15 -13    1.10    0.70
  -2 -15  13   -0.27    0.52
   2 -15 -13   -0.07    0.45
   2 -15 -13   -0.17    0.40
   2 -15 -13    0.81    0.66
  -2 -15  13    0.67    0.67
  -2  15  11    7.10    1.08
   2  15 -11    8.54    0.99
  -2  15  11    6.09    0.86
  -2  15  11    6.95    1.03
   2  15 -11    5.49    0.81
  -2  15  11    7.21    0.97
   2 -15 -11    5.89    0.82
   2 -15 -11    6.76    1.29
  -2 -15  11    5.43    0.96
  -2 -15  11    7.33    0.86
   2 -15 -11    7.67    1.07
  -2 -15  11    7.92    1.07
   2 -15 -11    7.69    1.12
  -2 -15  11    6.75    0.93
  -2  15   9   12.70    1.57
  -2  15   9   16.98    1.79
  -2  15   9   11.45    1.37
   2  15  -9   13.23    1.36
   2  15  -9   13.25    1.50
   2 -15  -9   13.70    1.52
  -2 -15   9   13.06    1.46
  -2 -15   9   15.45    1.55
   2 -15  -9   12.70    1.35
   2 -15  -9   15.89    1.80
  -2 -15   9   13.51    1.55
   2 -15  -9   13.10    1.54
  -2 -15   9   12.88    1.29
   2 -15  -9   11.43    1.43
  -2  15   7    3.84    0.70
   2  15  -7    4.41    0.74
  -2  15   7    2.48    0.58
  -2  15   7    3.74    0.77
   2  15  -7    2.77    0.53
  -2  15   7    2.87    0.69
   2 -15  -7    4.03    0.77
  -2 -15   7    4.43    0.79
   2 -15  -7    3.13    0.54
  -2 -15   7    3.79    0.56
  -2 -15   7    3.10    0.66
   2 -15  -7    2.12    0.63
  -2 -15   7    3.62    0.76
   2 -15  -7    2.98    0.68
   2 -15  -7    2.90    0.64
  -2 -15   7    3.06    0.53
  -2  15   5    1.71    0.50
  -2  15   5    0.73    0.46
  -2  15   5    0.80    0.53
  -2  15   5    1.92    0.59
   2  15  -5    1.31    0.46
   2  15  -5    1.20    0.50
   2  15  -5    1.08    0.39
   2  15  -5    0.96    0.30
   2  15  -5    1.57    0.45
   2 -15  -5    1.18    0.39
  -2 -15   5    1.01    0.39
  -2 -15   5    1.14    0.54
   2 -15  -5    0.44    0.51
  -2 -15   5    0.77    0.56
   2 -15  -5    1.64    0.55
  -2 -15   5    1.03    0.60
   2 -15  -5    1.44    0.60
  -2  15   3   27.36    2.28
   2  15  -3   27.31    2.26
  -2  15   3   26.21    2.28
   2  15  -3   27.15    2.28
   2  15  -3   24.52    2.31
   2  15  -3   27.46    2.22
  -2  15   3   28.86    2.36
   2  15  -3   24.25    2.26
  -2 -15   3   25.64    2.49
   2 -15  -3   25.19    2.34
  -2 -15   3   26.42    2.41
  -2 -15   3   27.47    2.26
   2 -15  -3   24.28    2.35
  -2 -15   3   25.18    2.31
   2 -15  -3   26.41    2.30
   2 -15  -3   24.79    2.29
  -2 -15   3   25.01    2.38
  -2  15   1    2.87    0.49
  -2  15   1    3.08    0.52
   2  15  -1    2.07    0.52
  -2  15   1    1.93    0.49
   2  15  -1    2.46    0.55
   2  15  -1    1.89    0.44
  -2  15   1    3.26    0.58
   2  15  -1    3.32    0.58
   2 -15  -1    4.59    0.68
   2 -15  -1    2.97    0.63
  -2 -15   1    3.41    0.67
  -2 -15   1    2.23    0.51
   2 -15  -1    3.21    0.63
  -2 -15   1    2.40    0.60
  -2 -15   1    4.70    0.63
   2 -15  -1    2.33    0.50
  -2 -15   1    3.36    0.54
  -2  15  -1    4.22    0.57
  -2  15  -1    2.46    0.44
   2  15   1    2.26    0.58
   2  15   1    3.21    0.62
   2  15   1    3.20    0.59
[truncated: 2,325,373 more chars]
